# Supplementary material
Source: PubMed Central journal article supplement (PMC133449)
Supplement: gb-2002-3-11-research0065-s5.pdf [file gb-2002-3-11-research0065-s5.pdf]

| CJID   | NAME | GWEIGHT | 81116     | 81176     | G1        | P1        | P2        | P3        | P4        | PHLS01    | PHLS02    | PHLS03    | X         |
|--------|------|---------|-----------|-----------|-----------|-----------|-----------|-----------|-----------|-----------|-----------|-----------|-----------|
| Cj0001 | dnaA | 1       | 0.1137    | 0.059771  | -0.401444 | -0.023563 | -0.37501  | 0.274172  | 0.198997  | -0.282614 | 0.254352  | 0.129876  | 0.382833  |
| Cj0002 | dnaN | 1       | 0.164915  | 0.01564   | -0.434598 | 0.193961  | -0.611755 | 0.157561  | 0.335255  | -0.49981  | 0.289362  | 0.383608  | -0.082988 |
| Cj0003 | gyrB | 1       | -0.008682 | 0.025454  |           | 0.09126   | -0.496957 | 0.028993  | 0.095722  | 0.377512  | -0.451662 | 0.010207  | 0.132511  |
| Cj0004 |      | 1       | 0.246226  | 0.032947  | -0.38628  | 0.415001  | -0.480961 | 0.170694  | -0.047816 | -0.351074 | 0.266637  | 0.191057  | -0.123748 |
| Cj0005 |      | 1       | 0.085289  | -0.203568 | -0.051549 | -0.188693 | -0.319046 | 0.102053  | -0.140826 | -0.095265 | -0.014937 | 0.172231  | 0.312084  |
| Cj0006 |      | 1       | -0.053793 | 0.041664  | -0.400111 | -0.111695 | -0.40679  | 0.036609  | 0.145612  | -0.266038 | 0.107688  | 0.250113  | 0.09788   |
| Cj0007 | gltB | 1       | -0.265345 | 0.03083   | -0.292829 | -0.061752 | -0.735764 | 0.056306  | 0.128029  | -0.468132 | -0.105628 | -0.055291 | 0.03984   |
| Cj0008 |      | 1       | -1.315451 | -0.080545 | -2.365128 | -1.510457 | -0.611976 | -1.920298 | 0.37951   | -0.890305 | 0.416732  | 0.472072  | -1.631735 |
| Cj0009 | gltD | 1       | -0.156498 | -0.122963 | -0.157946 | -0.384395 | -0.366057 | -0.052147 | -0.053943 | -0.359379 | -0.298495 | -0.105008 | 0.051998  |
| Cj0010 |      | 1       | -0.110293 | -0.004335 | -0.260152 | -0.266732 | -0.073393 | -0.024883 | 0.095992  | -0.112475 | -0.036526 | 0.346758  | 0.109026  |
| Cj0011 |      | 1       | -0.120608 | 0.037171  | -0.939814 | 0.230203  | -0.814514 | 0.153157  | 0.254231  | -1.225329 | 0.394843  | 0.439357  | -0.149121 |
| Cj0012 |      | 1       | -0.235314 | -0.000144 | -0.545403 | -0.148321 | -0.407172 | -0.047816 | 0.050188  | -0.086507 | 0.026729  | 0.132906  | -0.429537 |
| Cj0013 | ilvD | 1       | -0.108736 | -0.04216  | -0.581432 | 0.136716  | -0.815783 | 0.164143  | 0.325271  | -0.99223  | 0.154324  | 0.121413  | -0.400682 |
| Cj0014 |      | 1       | -0.014208 | -0.446345 | 0.018492  | -0.038303 | 0.124593  | -0.171531 | -0.22196  | 0.019915  | -0.07036  | 0.057693  | 0.354001  |
| Cj0015 |      | 1       | 0.072174  | 0.059909  | -0.348684 | 0.15782   | -0.094341 | 0.129217  | 0.227125  | 0.041243  | -0.007667 | 0.137897  | -0.000722 |
| Cj0016 |      | 1       | 0.18954   | 0.084609  | -0.148321 | -0.187543 | 0.337882  | -0.081614 | -0.045134 | 0.425889  | -0.599899 | -0.120608 | 0.27023   |
| Cj0017 |      | 1       | -0.002744 | -0.20573  | -0.186886 | -0.131313 | -0.127526 | 0.220578  | -0.019609 | 0.085968  | -0.119197 | -0.019609 | 0.265077  |
| Cj0018 |      | 1       | 0.067363  | -0.188365 | -0.292829 | 0.117695  | -0.084517 | 0.202512  | 0.175557  | -0.046176 | -0.067939 | 0.091395  | 0.245617  |
| Cj0019 |      | 1       | 0.260387  | 0.033511  | -0.488228 | 0.194087  | -0.410812 | 0.425352  | 0.330214  | 0.006047  | 0.267596  | 0.446256  | -0.044985 |
| Cj0020 |      | 1       | 0.208268  | 0.296663  | 0.199876  | 0.3667    | 0.532267  | 0.52647   | 0.288063  | 0.1956    |           | -0.269164 | 0.188021  |
| Cj0021 |      | 1       | 0.022616  | -0.162299 | -0.161492 | -0.015958 | 0.201132  | -0.868542 | -0.071421 | 1.010207  | 0.020911  | -0.145286 | 0.026871  |
| Cj0022 |      | 1       | 0.188654  | 0.044464  | -0.568965 | -0.138124 | -0.5041   | -0.120922 | -0.09727  | -0.162137 | -0.003611 | 0.123534  | -0.196938 |
| Cj0023 | purB | 1       | 0.044464  | -0.229551 | 0.065021  | -0.337339 | 0.221939  | -0.082377 | -0.187379 | 0.149129  | -1.02034  | -0.383642 | -0.134477 |
| Cj0024 | nrdA | 1       | 0.083928  | -0.012897 | -0.3485   | 0.224905  | 3.993756  | 0.029983  | 0.084064  | -0.343183 | 0.14991   | -0.113255 | -0.408704 |
| Cj0025 |      | 1       | -0.077193 | -0.328616 | -0.156659 | -0.170556 | -0.338798 | 0.058524  | -0.222128 | 0.005472  | -0.225329 | -0.228368 | -0.15682  |
| Cj0026 |      | 1       | 0.051859  | 0.062536  | -0.513131 | -0.075824 | -0.455218 | 0.06571   | -0.007667 | -0.115597 | 0.01564   | 0.103531  | -0.031209 |
| Cj0027 | pyrG | 1       | 0.03083   | -0.000433 | -0.567468 | -0.030914 | -0.652448 | 0.090989  | 0.018919  | -0.463748 | -0.259979 | 0.062122  | -0.005927 |
| Cj0028 | recJ | 1       | 0.147307  | -0.048711 | -0.566827 | 0.569977  | -0.618827 | 0.234133  | 0.266517  | -0.951764 | 0.519441  | 0.298189  | -0.476739 |
| Cj0029 | ansA | 1       | -0.187543 | -0.309359 | -0.471329 | -0.402969 | -0.559367 | -0.157464 | -0.225329 | -0.427013 | -0.338068 | -0.317606 | -0.107492 |
| Cj0030 |      | 1       | -0.872235 | -0.361787 | -0.532825 | -0.006217 | -0.234126 | 0.113434  | 0.15562   | -0.114348 | 0.099497  | 0.121679  | -0.158268 |
| Cj0031 |      | 1       | 0.311271  | 0.015212  | 0.01407   | 0.10742   | -0.258598 | 0.135666  | 0.110764  | 0.255319  | 0.032947  | -0.02694  | -0.176414 |
| Cj0032 |      | 1       | -1.422366 | -0.056041 | 0.253989  | -1.49981  | 0.184344  | -0.540778 | -1.018586 | 0.36042   | -0.260843 | -0.686174 | -2.113411 |
| Cj0033 |      | 1       | -1.03623  | -0.265865 | -0.067183 | -1.538262 | -0.41523  | -2.70557  | -2.298318 | 0.066399  | -2.431287 | -2.556393 | -2.071573 |

|        |   |           |           |           |           |           |           |           |           |           |           |           |
|--------|---|-----------|-----------|-----------|-----------|-----------|-----------|-----------|-----------|-----------|-----------|-----------|
| Cj0034 | 1 | -0.248451 | 0.046142  | -1.123748 | 0.107688  | -1.750979 | -0.127999 | 0.449007  | -1.349603 | 0.007196  | -0.240759 | -0.601869 |
| Cj0035 | 1 | 0.091531  | 0.034216  | 0.015069  | -0.038006 | 0.161952  | 0.100305  | 0.008057  | 0.145743  |           | -0.141462 | 0.133695  |
| Cj0036 | 1 | 0.156785  | -0.026793 | -0.768568 | 0.512884  | -1.135428 | 0.328951  | 0.452595  | -0.816545 | 0.380508  | 0.475604  | -0.575185 |
| Cj0037 | 1 | 0.136323  | -0.035047 | -0.444184 | -0.345931 | -0.662689 | 0.239765  | 0.043764  | -0.102837 | -0.023123 | 0.02148   | -0.111228 |
| Cj0038 | 1 | -0.159718 | -0.005058 | -0.474933 | 0.085017  | -0.833413 | -0.044241 | 0.227741  | -0.31079  | -0.231922 | 0.109962  | 0.175812  |
| Cj0039 | 1 | -0.006942 | 0.017494  | -0.379507 | 0.073409  | -0.171044 | -0.008102 | 0.16877   | -0.076585 | -0.132104 | 0.063917  | 0.158078  |
| Cj0040 | 1 | 0.252416  | 0.061431  | -0.662004 | 0.259423  | -0.269512 | 0.071488  | 0.1129    | -0.24554  | 0.24732   | 0.436588  | 0.126973  |
| Cj0041 | 1 | 0.142609  | 0.109962  | -0.175762 | 0.119954  | -0.295482 | 0.257011  | 0.054918  | 0.035342  | 0.313014  | 0.404576  | -0.085895 |
| Cj0042 | 1 | -0.18164  | -0.087274 | 0.157949  | -0.037562 | 0.157432  | 0.088956  | 0.025312  | -0.028558 | -0.249308 | -0.088654 | 0.123269  |
| Cj0043 | 1 | 0.1121    | -0.03934  | -0.413692 | 0.293841  | -0.414461 | 0.292546  | 0.295605  | -0.309359 | 0.209765  | 0.134747  | -0.36829  |
| Cj0044 | 1 | 0.239765  | 0.154324  | -0.019902 | 0.209266  | 0.244765  | 0.245252  | 0.198117  | 0.298424  | 0.239642  | 0.09815   | 0.237441  |
| Cj0045 | 1 | -0.053643 | 0.168     | -0.478949 | -0.018878 | -0.465142 | 0.316493  | -0.020779 | -0.104077 | 0.092749  | 0.262313  | -0.136062 |
| Cj0046 | 1 | -0.271252 | 0.256407  | -0.001443 | -0.159396 | 0.035202  | 0.181548  | -0.101598 | -0.011443 | -0.08896  | -0.049009 | -0.001588 |
| Cj0047 | 1 | -0.1181   | 0.033652  | -0.147362 | -0.046474 | -0.069301 | 0.167101  | 0.018777  | 0.247806  | -0.000144 | -0.099587 | -0.060247 |
| Cj0048 | 1 | -0.029294 | 0.239031  | 0.351967  | -0.050951 | 0.337311  | 0.141956  | 0.01264   | 0.378179  | 0.016639  | 0.111699  | 0.275841  |
| Cj0049 | 1 | -0.253257 | -0.307394 | 0.141171  | -0.501647 | 0.053667  | 0.156526  | -0.233786 | 0.037171  | -0.055891 | -0.135745 | 0.080794  |
| Cj0050 | 1 | -0.228368 | -0.367546 | -0.104853 | -0.230905 | -0.003901 | 0.017494  | -0.123905 | -0.072483 | -0.207894 | -0.035786 | -0.11076  |
| Cj0051 | 1 | -0.374449 | -0.048114 |           | 0.401521  | 0.376402  | -0.028999 | -0.134477 | -0.648598 | 0.325041  | 0.302524  | -0.541618 |
| Cj0052 | 1 | -0.075976 | 0.398241  | 0.191942  | 0.181166  | 0.344828  | 0.158208  | -0.21558  | 0.146655  | 0.00173   | 0.15562   | -0.026058 |
| Cj0053 | 1 | -0.428954 | -0.294597 | -0.015666 | -0.400873 | -0.219606 | 0.141694  | -0.181804 | -0.002021 | -0.006797 | 0.055335  | -0.001732 |
| Cj0054 | 1 | -0.330792 | -0.029146 | -0.717145 | -0.016541 | -0.770781 | 0.070389  | 0.186501  | -0.705335 | -0.022977 | 0.029135  | -0.218263 |
| Cj0055 | 1 | -1.378194 | 0.003026  | -0.235994 | -0.001299 | -0.126266 | 0.144177  | 0.194465  | -0.019902 | 0.024887  | 0.084745  | 0.014498  |
| Cj0056 | 1 | -2.769059 | 0.032947  | 0.041523  | 0.017209  | 0.075738  | 0.04684   | 0.094777  | 0.166715  | -0.078107 | 0.04991   | 0.120219  |
| Cj0057 | 1 | -2.765131 | -0.407172 | 0.258459  | -0.216921 | -0.070512 | 0.031536  | -0.011588 | 0.07382   | -0.149761 | -0.103922 | 0.21661   |
| Cj0058 | 1 | -1.907251 | -0.043646 | -0.298495 | -0.109826 | -0.095111 | 0.019204  | 0.114367  | -0.125793 | 0.084473  | 0.185486  | 0.209266  |
| Cj0059 | 1 | -1.067636 | -0.224992 | 0.028852  | -0.008537 | 0.252416  | 0.116365  | 0.204892  | 0.011209  | -0.151683 | -0.017563 | 0.149389  |
| Cj0060 | 1 | -0.027822 | -0.091418 | 0.159758  | 0.168514  | 0.140648  | -0.013043 | 0.048794  | 0.273456  | -0.052745 | 0.147307  | 0.110096  |
| Cj0061 | 1 | 0.014498  | -0.283843 | -0.092956 | -0.058293 | -0.042754 | 0.049073  | -0.042605 | 0.053667  | -0.051848 | 0.042784  | 0.160791  |
| Cj0062 | 1 | 0.084064  | -0.30561  | 0.023752  | -0.949812 | 0.238053  | -0.477944 | -0.131155 | 0.08134   | 1.247259  | -0.168771 | 0.105812  |
| Cj0063 | 1 | 0.039981  | 0.053945  | -0.319406 | 0.190804  | -0.514779 | 0.290542  | 0.203138  | -0.024443 | 0.116099  | 0.462785  | 0.092613  |
| Cj0064 | 1 | -0.665432 | 0.025029  | 0.191689  | 0.199123  | 0.343806  | 0.206393  | 0.070801  | 0.271784  | 0.000721  | 0.230818  | 0.078746  |
| Cj0065 | 1 | 0.069015  | -0.320846 | -0.001732 | -0.102372 | 0.12075   | 0.1141    | -0.089114 | 0.244887  | -0.007812 | 0.119555  | 0.057     |
| Cj0066 | 1 | 0.062536  | -0.107803 | -0.166179 | 0.006908  | 0.063227  | 0.138552  | 0.123534  | 0.061292  | 0.057138  | 0.116764  | 0.033793  |
| Cj0067 | 1 | 0.19131   | -0.059495 | 0.062398  | 0.127633  | 0.230941  | 0.264717  | 0.124328  | 0.257373  | 0.05797   | 0.15095   | 0.091801  |
| Cj0068 | 1 | 0.127633  | -0.069906 | -0.49879  | 0.068464  | -0.351627 | 0.038577  | 0         | 0.025312  | -0.018732 | 0.05464   | -0.141144 |

pspA

|        |   |           |           |           |           |           |           |           |           |           |           |           |
|--------|---|-----------|-----------|-----------|-----------|-----------|-----------|-----------|-----------|-----------|-----------|-----------|
| Cj0069 | 1 | 0.023752  | -0.344282 | -0.569822 | -0.559579 | 0.809826  | -0.518908 | -0.273518 | 0.211137  | -0.536168 | -0.116066 | 0.119555  |
| Cj0070 | 1 | 0.223175  | -0.410045 | 0.118094  | -0.594008 | 0.63951   | -0.401635 | -0.004914 | 0.098824  |           | -0.054992 | 0.185867  |
| Cj0071 | 1 | 0.213254  | -0.161331 | 0.145482  | -0.772752 | 0.514299  | -1.251882 | -0.569394 | 0.136454  | -1.445755 | -0.915391 | 0.037312  |
| Cj0072 | 1 | 0.143524  | -0.041863 | 2.251901  | 0.189919  | -1.149441 | 0.129085  | 0.039934  |           | 0.004465  | 0.009347  | 0.017352  |
| Cj0073 | 1 | -0.002888 | -0.280685 | 0.075464  | -0.150561 | 0.803888  | -0.005348 | -0.170232 | 0.159758  | -0.412347 | 0.100574  | -0.09542  |
| Cj0074 | 1 | 0.033652  | -0.260497 | 0.148999  |           | 0.327802  | -0.035343 | 0.035905  | 0.094236  | -0.983361 | 0.050049  | 0.091124  |
| Cj0075 | 1 | -0.116379 | -0.083906 | 0.023894  | -0.07127  | 0.440633  | -0.151362 | -0.035343 | 0.251931  | -0.642955 | -0.012461 | 0.195852  |
| Cj0076 | 1 | -0.043497 | 0.026163  | 0.243669  | 0.212258  | 0.343351  | 0.193456  | 0.087191  | 0.356595  | 0.00101   | 0.177216  | 0.224411  |
| Cj0077 | 1 | -0.069301 | -0.112163 | 0.074231  | -0.443399 | 0.237931  | 0.005472  | -0.297077 | 0.221073  | -3.013917 | -0.317427 | 0.350158  |
| Cj0078 | 1 | -0.440655 | -0.289298 | -0.060849 | -0.0511   | 0.171335  | 0.390888  | 0.045163  | 0.075053  | -0.005782 | -0.016395 | 0.07738   |
| Cj0079 | 1 | 0.123401  | 0.058801  | -0.036526 | 0.200253  | -0.089267 | 0.238542  | 0.27608   | 0.181039  | 0.25882   | 0.104873  | 0.029842  |
| Cj0080 | 1 | 0.076559  | 0.024745  | -0.100051 | 0.14952   | -0.090035 | 0.188781  | 0.102725  | 0.176706  | 0.227618  | 0.366924  | 0.088006  |
| Cj0081 | 1 | -0.040972 | -0.14401  | 0.071763  | 0.007626  | 0.151469  | 0.26123   | -0.101598 | 0.140124  | 0.14978   | 0.307895  | -0.05125  |
| Cj0082 | 1 | 0.009204  | -0.081003 | -0.066276 | -0.021951 | 0.189793  | 0.017352  | -0.047219 | -0.050054 | -0.082072 | 0.067226  | 0.10916   |
| Cj0083 | 1 | 0.0719    | -0.075216 | 0.653702  | 0.123004  | 0.60966   | 0.109427  | 0.115566  | 0.226015  | 0.073546  | 0.18574   | 0.061154  |
| Cj0084 | 1 | -0.09542  | 0.469365  | 0.283329  | 0.02361   | 0.589763  | 0.060877  | -0.02327  | 0.413594  | 0.146655  | 0.211261  | -0.059495 |
| Cj0085 | 1 | 0.008917  | -0.001588 | 0.199625  | -0.256011 | 0.282143  | 0.055196  | -0.259288 | 0.113967  | -0.130839 | 0.020342  | -0.206395 |
| Cj0086 | 1 | 0.033511  | -0.004045 | 0.063089  | -0.187214 | 0.058386  | -0.125164 | -0.140348 | 0.010923  | -0.344099 | 0.023894  | -0.105628 |
| Cj0087 | 1 | 0.025879  | 0.231064  | 0.159112  | -0.537215 | 0.229219  | 0.012211  | -0.01217  | 0.143002  | -1.90185  | -0.112787 | 0.154842  |
| Cj0088 | 1 | -0.07765  | 0.263515  | 0.110631  | 0.052833  | -0.122491 | -0.040972 | -0.163268 | -0.428566 | 0.070939  | -0.046772 | 0.24245   |
| Cj0089 | 1 | 0.02772   | 0.148609  | -0.011443 | -0.107648 | -0.11951  | -0.027822 | -0.170394 | 0.051163  | 0.154713  | 0.211635  | -0.050502 |
| Cj0090 | 1 | -0.117787 | -0.049158 | -0.094649 | 0.106884  | -0.000433 | 0.08624   | 0.190552  | -0.002744 | 0.033793  | 0.130931  | 0.022332  |
| Cj0091 | 1 | 0.133827  | 0.017209  | -0.254978 | 0.170822  | -0.071421 | 0.21176   | 0.186247  | 0.015069  | 0.151209  | 0.201885  | 0.270947  |
| Cj0092 | 1 | 0.173511  | 0.286053  | 0.037312  | 0.046282  | 0.198117  | 0.095722  | 0.047259  | 0.378068  | 0.048376  | 0.140779  | 0.215492  |
| Cj0093 | 1 | -0.01028  | 0.045723  | -0.544771 | 0.029559  | -0.752194 | 0.100843  | -0.036674 | -0.386091 | 0.092613  | 0.274053  | 0.068052  |
| Cj0094 | 1 | -0.248965 | 0.174662  | -0.146084 | -0.15441  | 0.068327  | 0.174151  | 0.045583  | -0.035934 | -0.28086  | 0.14509   | 0.156655  |
| Cj0095 | 1 | -0.003611 | 0.430499  | 0.021195  | 0.1995    | 0.10017   | 0.137372  | 0.105812  | 0.262313  | -0.461164 | 0.080385  | 0.555129  |
| Cj0096 | 1 | 0.06571   | 0.648005  | 0.181166  | 0.089905  | 0.377624  | 0.232538  | 0.177089  | 0.711935  | 0.272382  | 0.247441  | 0.700085  |
| Cj0097 | 1 | -0.213906 | -0.324455 | 0.10541   | -0.21491  | -0.099278 | 0.117163  | -0.053194 | 0.027862  | 0.013927  | -0.174621 | 0.391328  |
| Cj0098 | 1 | -0.018878 | -0.186557 | 0.103531  | -0.110449 | -0.033422 | 0.147567  | 0.07519   | -0.010134 | -0.082377 | 0.153935  | 0.219587  |
| Cj0099 | 1 | -0.127526 | -0.017709 |           | 0.042084  | 1.85591   | -0.107803 | 0.041523  | -0.786373 | -0.114035 | 0.163112  | 0.123799  |
| Cj0100 | 1 | 0.14978   | 0.082294  | -0.212902 | 0.243547  | -0.054542 | -0.122177 | -0.107492 | 0.11703   | -0.003611 | 0.100305  | 0.205768  |
| Cj0101 | 1 | 0.028711  | -0.226004 | -0.069301 | -0.283843 | -0.127683 | 0.05894   | -0.044092 | -0.143213 | -0.038599 | 0.162468  | 0.179001  |
| Cj0102 | 1 | -0.148801 | -0.248451 | 0.129613  | -0.89084  | 0.297368  | -0.458386 | -0.247765 | 0.060324  | -0.686638 | 0.041944  | 0.183074  |
| Cj0103 | 1 | 0.067639  | -0.229213 | -0.171368 | -0.144967 | 0.269871  | -0.058142 | 0.129613  | 0.074094  | -0.178208 | 0.184978  | -0.003467 |

|        |       |   |           |           |           |           |           |           |           |           |           |           |           |
|--------|-------|---|-----------|-----------|-----------|-----------|-----------|-----------|-----------|-----------|-----------|-----------|-----------|
| Cj0104 | atpH  | 1 | 0.15549   | 0.184852  | 0.244887  | -0.058142 | 0.360645  | 0.22231   | -0.011152 | 0.248049  | -0.50226  | 0.098689  | 0.241474  |
| Cj0105 | atpA  | 1 | -0.065974 | -0.511279 | 0.12618   | -0.334062 | -0.059345 | 0.010064  | -0.230905 | 0.069977  | -0.151042 | -0.146883 | 0.260507  |
| Cj0106 | atpG  | 1 | -0.101289 | -0.058593 | 0.348912  | 1.070664  | 0.333882  | 0.915253  | 0.80521   | 0.021338  | 0.479748  | 0.095992  | 0.971663  |
| Cj0107 | atpD  | 1 | -0.034456 | -0.22651  | -0.023416 | -0.002599 | 0.242328  | 0.161823  | 0.15004   | 0.141302  | -0.24554  | -0.005058 | 0.085697  |
| Cj0108 | atpC  | 1 | -0.034456 | 0.273934  | 0.241474  | 0.146786  | 0.519743  | 0.083928  | 0.115699  | 0.374066  | -0.486004 | -0.164238 | 0.126973  |
| Cj0109 | exbB3 | 1 | 0.021053  | 0.031254  | -0.597714 | -0.043497 | -0.704159 | 0.065986  | 0.088006  | -0.322108 | 0.116498  | 0.056306  | 0.11023   |
| Cj0110 | exbD3 | 1 | 0.128293  | -0.078564 | -0.290533 | -0.056341 | -0.255839 | 0.15082   | 0.188274  | -0.073849 | -0.0432   | -0.034604 | 0.180784  |
| Cj0111 |       | 1 | 0.205017  | 0.082703  | -0.406407 | 0.08787   | -0.364013 | -0.015958 | 0.088142  | 0.024036  | 0.021053  | 0.161436  | 0.188654  |
| Cj0112 |       | 1 | 0.491494  | -0.01057  | -0.421399 | 0.306029  | -0.008102 | 0.312781  | 0.125916  | -0.131945 | -0.11703  | 0.194087  | -0.073241 |
| Cj0113 | pal   | 1 | 0.025029  | -0.281737 |           | -0.549831 | -0.868806 | 0.109829  | -0.24708  | -0.341354 | -2.135428 | -0.130997 | 0.222186  |
| Cj0114 |       | 1 | -0.054992 | -0.273692 | -0.349419 | -0.338433 | 0.034075  | -0.08804  | 0.0397    | -0.073849 | -0.469929 | -0.050353 | 0.057554  |
| Cj0115 | slyD  | 1 | 0.074916  | 0.017637  | -0.848921 | 0.168129  | -0.563412 | 0.064193  | 0.204892  | -0.608672 | 0.071763  | 0.227864  | -0.036674 |
| Cj0116 | fabD  | 1 | -0.156016 | -0.165855 |           | 0.175173  | -0.090496 | -0.156016 | 0.118493  | -0.253773 | -0.08804  | 0.054084  | 0.048655  |
| Cj0117 | pfs   | 1 | -0.189516 | -0.371833 | 0.201257  | -0.582512 | 0.431997  | -0.343183 | -0.351627 | 0.424492  | -1.96917  | -0.081919 | 0.043484  |
| Cj0118 |       | 1 | -0.12202  | -0.067939 | -0.137807 | -0.201244 | 0.021053  | 0.024887  | -0.02694  | -0.076737 | -0.163429 | -0.039933 | 0.029276  |
| Cj0119 |       | 1 | 0.154454  | -0.137489 | -0.077041 | 0.022616  | 0.044044  | 0.063503  | -0.012606 | 0.172231  | 0.026021  | 0.199625  | -0.07552  |
| Cj0120 |       | 1 | 0.07861   | -0.011733 | -0.166017 | 0.055335  | 0.156008  | 0.076833  | -0.07036  | 0.169284  | -0.016395 | 0.137241  | -0.186393 |
| Cj0121 |       | 1 | -0.335699 | -0.462555 | -0.178535 | -0.25515  | 0.024178  | 0.185867  | -0.127841 | 0.141956  | -0.128472 | 0.039981  | -0.259806 |
| Cj0122 |       | 1 | -1.471529 | -0.900772 | -0.343183 | -0.112943 | 0.019488  | 0.178237  | 0.136585  | 0.026871  | -0.022683 | 0.085968  | 0.005041  |
| Cj0123 |       | 1 | -0.052296 | -0.141144 | 0.122606  | 0.012354  | 0.252295  | 0.131063  | 0.040121  | 0.257614  | -0.079478 | 0.032101  | 0.053667  |
| Cj0124 |       | 1 | 0.178364  | 0.008774  | -0.226848 | 0.280481  | -0.164399 | 0.317999  | 0.123666  | 0.25084   | 0.53087   | 0.534958  | -0.085435 |
| Cj0125 |       | 1 | 0.034497  | -0.086507 | -0.299915 | 0.111031  | -0.310075 | 0.327917  | 0.115433  | -0.032831 | 0.23952   | 0.299127  | -0.133685 |
| Cj0126 |       | 1 | 0.053806  | -0.127211 | -0.006942 | -0.227016 | 0.090447  | 0.158337  | -0.013625 | 0.072998  | 0.033088  | 0.148479  | -0.117474 |
| Cj0127 |       | 1 | 0.077243  | 0.003602  | 0.052138  | 0.119423  | 0.10916   | 0.310456  | 0.234869  | 0.292546  | 0.030689  | 0.081749  | -0.020926 |
| Cj0128 |       | 1 | 0.02772   | 0.051442  | 0.076559  | 0.163885  | 0.234992  | 0.145612  | 0.064883  | 0.265077  | 0.294077  | 0.202888  | -0.034751 |
| Cj0129 |       | 1 | -0.103302 | -0.237183 | 0.117429  | -0.233108 | 0.041804  | -0.01057  | -0.251195 | 0.099228  | -0.378944 | -0.148801 | -0.121079 |
| Cj0130 | tyrA  | 1 | 0.026163  | -0.045283 | -0.079326 | -0.10827  | 0.068877  | 0.041383  | 0.036327  | -0.027969 | -0.099124 | -0.035934 | -0.047517 |
| Cj0131 |       | 1 | 0.030265  | -0.013625 |           | 0.087599  |           | 0.1038    | 0.132511  | 3.642748  | 0.015069  | -0.082988 | -0.002744 |
| Cj0132 | lpxC  | 1 | 0.245496  | 0.025029  | -0.874084 | 0.151209  | -0.514985 | 0.0782    | 0.151989  | 1.076422  | 0.086784  | -0.131313 | 0.03337   |
| Cj0133 |       | 1 | 0.042784  | 0.040542  | -0.187707 | -0.122334 | -0.298673 | 0.108759  | 0.011925  | 0.060186  | 0.033088  | -0.208394 | -0.084976 |
| Cj0134 | thrB  | 1 | -0.086048 | -0.050652 | -0.186065 | 0.005759  | -0.347215 | 0.099363  | 0.097341  | -0.143692 | 0.088142  | -0.044092 | -0.017271 |
| Cj0135 |       | 1 | 0.094641  | 0.133169  | -0.011443 | 0.050467  | 0.040261  | -1.439872 | 0.029842  | 0.20989   | -0.098969 | 0.038998  | 0.153287  |
| Cj0136 | infB  | 1 | 0.202888  | 0.016354  | -0.358639 | 0.052972  | -0.323733 | 0.132643  | 0.056029  | -0.031946 | 0.176833  | 0.122606  | 0.095722  |
| Cj0137 |       | 1 | -0.281036 | 0.179638  | 0.09004   | -0.326082 | -0.0145   | -0.124534 | -0.390812 | 0.140648  | -0.629947 | 0.1396    | -0.196773 |
| Cj0138 |       | 1 | -0.490253 | -0.0885   | -0.063711 | -0.340989 | -0.832128 | -0.313119 | -0.204233 | -0.170719 | -0.182295 | -0.541198 | -0.180986 |

|        |   |           |           |           |           |           |           |           |           |           |           |           |
|--------|---|-----------|-----------|-----------|-----------|-----------|-----------|-----------|-----------|-----------|-----------|-----------|
| Cj0139 | 1 | -0.809196 | -0.027969 | -0.231413 | -0.187871 | -0.782397 | -0.609993 | -0.505124 | 0.133564  | 0.105812  | -0.785626 | -0.070058 |
| Cj0140 | 1 | -1.570464 | 0.249506  | 0.115699  | 0.055612  | 0.278461  | 0.260267  | 0.14952   | 0.403268  | 0.201634  | 0.12446   | 0.177471  |
| Cj0141 | 1 | -0.105318 | 0.177726  | -0.436549 | -0.056941 | -0.838564 | 0.141956  | -0.115754 | -0.264998 | 0.066399  | 0.023894  | -0.11951  |
| Cj0142 | 1 | -0.113255 | 0.081476  | -0.031946 | -0.009408 | 0.008057  | 0.00863   | 0.078473  | 0.072037  | 0.0719    | -0.0613   | 0.060462  |
| Cj0143 | 1 | 0.116897  | 0.462157  | -0.056041 | 0.319271  | 0.263155  | 0.190804  | 0.183836  | 0.279293  | 0.125916  | 0.028993  | 0.466131  |
| Cj0144 | 1 | 0.269033  | 0.303342  | 0.273217  | 0.108223  | 0.375735  | -0.030472 | -0.139395 | 0.319965  | -0.024296 | -0.249994 | 0.302875  |
| Cj0145 | 1 | -0.232599 | -0.033865 | -0.119354 | -0.069603 | -0.242977 | 0.173639  | 0.048794  | -0.278059 | 0.281669  | 0.187768  | -0.018732 |
| Cj0146 | 1 | 0.102994  | -0.265691 | 0.147307  | 1.041383  | 0.266277  | -0.133844 | 0.00906   | 1.016282  | 0.265557  | 0.156785  |           |
| Cj0147 | 1 | 0.014498  | -0.057242 |           | 0.064607  |           | -0.03003  | 0.16877   | 0.163885  | 0.196481  | 0.059632  |           |
| Cj0148 | 1 | 0.011925  | 0.170822  | 0.147958  | -0.17397  | 0.425459  | -0.061451 | -0.213571 | 0.210888  | -0.389678 | -0.036674 | 0.19497   |
| Cj0149 | 1 | -0.207228 | -0.39973  | 0.279531  | -0.658583 | 0.148479  | -0.072483 | -0.329522 | 0.024036  | -0.355867 | -0.263438 | 0.31429   |
| Cj0150 | 1 | -0.034308 | -0.206562 | -0.26067  | -0.297963 | -0.137807 | 0.077927  | 0.263275  | -0.038599 | -0.114816 | 0.057     | 0.178237  |
| Cj0151 | 1 | -0.015666 | -0.160524 | -0.128945 | -0.139554 | 0.210139  | -0.138124 | 0.070801  | 0.143785  | -0.050652 | 0.042924  | -0.207228 |
| Cj0152 | 1 | 0.15549   | 0.031536  | -0.503078 | 0.133564  | -0.386657 | 0.1125    | 0.217355  | -0.360305 | 0.125916  | 0.314174  | -0.130523 |
| Cj0153 | 1 | 0.069015  | -0.056191 | 0.100305  | -0.384019 | 0.117828  | -0.024296 | -0.114035 | 0.025879  | -0.08253  | -0.137013 | 0.330558  |
| Cj0154 | 1 | 0.181675  | -0.010716 | -0.047517 | -0.041863 | -0.106405 | 0.03956   | 0.082021  | -0.062957 | -0.017855 | 0.182057  | 0.126576  |
| Cj0155 | 1 | 0.101785  | 0.030972  | -0.134477 | 0.096667  | -0.147522 | 0.183074  | 0.153935  | 0.257373  | -0.162945 | 0.29537   | -0.009553 |
| Cj0156 | 1 | 0.259664  | 0.573471  | 0.176195  | 0.318577  | 0.364572  | 0.232538  | -0.134477 | 0.356482  | 0.195096  | 0.344942  | -0.019463 |
| Cj0157 | 1 | 0.148348  | -0.092186 | -0.009118 | -0.058894 | 0.255319  | 0.111432  | -0.056941 | 0.155231  | -0.000577 | 0.229342  | 0.015498  |
| Cj0158 | 1 | 0.127897  | 0.022474  | -0.552368 | -0.006797 | -0.160524 | 0.100978  | 0.159887  | -0.068393 | 0.221197  | 0.230449  | -0.090649 |
| Cj0159 | 1 | 0.279055  | -0.008537 | -0.611314 | 0.17645   | -0.503691 | 0.255078  | 0.173383  | -0.055591 | 0.134221  | 0.122474  | 0.057138  |
| Cj0160 | 1 | 0.2444    | -0.027675 | -0.346298 | 0.208642  | 0.865206  | 0.261952  | 0.179384  | 0.165172  | 0.108357  | 0.172488  | 0.045024  |
| Cj0161 | 1 | 0.010493  | -0.08758  | 0.145482  | -0.066276 | 3.208548  | 0.116498  | 0.004178  | 0.205768  | 0.095857  | 0.060047  | 0.110898  |
| Cj0162 | 1 | -0.034456 | -0.217088 | 0.099093  | -0.234296 | 0.455544  | -0.111072 | 0.034075  | 0.052138  | -0.325901 | 0.216734  | 0.252416  |
| Cj0163 | 1 | 0.016211  | -0.067636 | 0.163756  | -0.939538 | 0.503959  | -0.852042 | -0.343916 | 0.215244  |           | -0.327529 | 0.08787   |
| Cj0164 | 1 | -0.159235 | 0.456491  | 1.720454  | -0.345748 | 0.967464  | -0.120451 | -0.045283 |           | -1.156177 | 0.200504  | -0.170719 |
| Cj0165 | 1 | -0.050652 | -0.101908 | -1.229044 | -0.518081 | 0.442015  | 0.038155  | -0.124692 | 0.033793  | 0.256286  | 0.024603  | 0.23952   |
| Cj0166 | 1 | 0.074642  | -0.232091 | 0.133432  | -0.069301 | 0.27011   | 0.104739  | 0.071213  | 0.069152  | -0.18705  | -0.060397 | 0.131721  |
| Cj0167 | 1 | -0.350155 | -0.212902 | 0.287236  |           | 0.545178  | 1.238237  | 1.102524  | 0.250477  | 1.016568  | 1.584145  | -0.013917 |
| Cj0168 | 1 | 0.011066  | -0.002455 | 0.241962  | 0.035624  | 0.378512  | 0.139993  | 0.066675  | 0.360308  | -0.099278 | 0.063089  | -0.046474 |
| Cj0169 | 1 | -0.157303 | -0.177882 | 0.091801  | -0.292829 | 0.121546  | 0.172616  | -0.242294 | 0.152638  | -0.766603 | -0.085589 | -0.13733  |
| Cj0170 | 1 | -1.629055 | 0.062122  | -0.490659 | -0.162622 | -0.471329 | 0.171335  | -0.07127  | -0.140348 | -0.01057  | -0.100206 | -0.025324 |
| Cj0171 | 1 | -1.182786 | -0.259979 | 0.147046  | -0.113723 | 0.27274   | 0.198997  | 0.055751  | 0.222557  | -0.41889  | -0.133369 | 0.078473  |
| Cj0172 | 1 | -0.141303 | 0.007339  | 0.025454  | 0.1038    | 0.242328  | 0.201885  | 0.122209  | 0.195726  | 0.172231  | 0.084609  | -0.099742 |
| Cj0173 | 1 | -0.072179 | -0.208894 | -0.017417 | -0.992804 | 0.044604  | -0.247765 | -0.36829  | 0.015783  | -0.634867 | -0.084364 | -0.142258 |

miaA

sodB

|        |   |           |           |           |           |           |           |           |           |           |           |           |
|--------|---|-----------|-----------|-----------|-----------|-----------|-----------|-----------|-----------|-----------|-----------|-----------|
| Cj0174 | 1 | -0.051549 | -0.094803 | -0.261362 | -0.057392 | 0.009491  | 0.154065  | -0.025177 | -0.018878 | 0.025454  | 0.129349  | -0.050801 |
| Cj0175 | 1 | -0.249822 | -0.016979 | -0.018293 | 0.099497  | 0.093966  | -0.067939 | 0.219587  | 0.218347  | 0.189287  | 0.171591  | -0.028116 |
| Cj0176 | 1 | -0.737447 | 0.085425  | 0.2806    | 0.148479  | 0.60521   | -0.637558 | -0.006797 | 0.345396  | 0.185105  | 0.330673  | -0.041269 |
| Cj0177 | 1 | -1.311148 | -1.244002 | 0.129481  | -0.239907 | 0.194844  | -0.231413 | -0.286304 | 0.073409  | -0.292299 | 0.098015  | -0.116223 |
| Cj0178 | 1 | -3.55131  | -2.620601 | -0.050951 | -0.038747 | 0.047399  | 0.081612  | 0.297133  | -0.013334 | -0.261016 | -0.12658  | 0.200253  |
| Cj0179 | 1 | -3.294774 | -2.575185 | 0.062398  | 0.062398  | 1.834711  | 0.236584  | -0.007232 | 0.928048  | -0.151843 | -0.062957 | 0.048794  |
| Cj0180 | 1 | -2.904008 | -1.785875 | 0.056445  | 0.18954   | 0.208767  | 0.101516  | 0.061431  | 0.324465  | 0.159887  | 0.23008   | -0.128787 |
| Cj0181 | 1 | -1.956796 | -0.878321 | 0.074916  | 4.062294  | 0.130404  | -0.156498 | -0.327348 | 0.169155  | -0.365314 | 0.499578  | -0.085129 |
| Cj0182 | 1 | -0.457197 | -0.143851 | -0.144808 | 0.063503  | -0.163429 | -0.410428 | 0.118227  | -0.16537  | 0.126576  | 0.168     | -0.043497 |
| Cj0183 | 1 | 0.040121  | 0.062812  | -0.169582 | 0.16221   | -0.109203 | 0.171591  | 0.159629  | 0.076149  | 0.00101   | 0.174023  | 0.217603  |
| Cj0184 | 1 | 0.210015  | 0.03689   | -0.202572 | 0.206893  | 0.082021  | 0.36446   | 0.282262  | 0.260146  | 0.20989   | 0.164915  | 0.219711  |
| Cj0185 | 1 | -0.059345 | 0.238787  | 0.052138  | -0.248622 | 0.023752  | 0.09329   | -0.219438 | 0.100574  | -0.291415 | 0.102188  | -0.151202 |
| Cj0186 | 1 | -0.148961 | 0.04698   | -0.039933 | -0.142895 | -0.248965 | 0.059632  | 0.014355  | -0.065219 | -0.077498 | 0.050745  | -0.080393 |
| Cj0187 | 1 | 0.08093   | 0.112767  | -0.008537 | -0.247937 | 0.05797   | -0.120765 | -0.09619  | 0.156526  | -0.069149 | 0.098015  | 0.073409  |
| Cj0188 | 1 | 0.000289  | 0.69439   | 0.260507  | -1.923031 | 0.418784  | -0.973129 | -0.229213 | 0.349931  | -1.471929 | -0.067485 | 0.351402  |
| Cj0189 | 1 | -0.062505 | -0.035786 | -0.004769 | -0.065672 | -0.049606 | 0.154972  | -0.000577 | -0.040527 | -0.094649 | 0.104471  | -0.22803  |
| Cj0190 | 1 | -0.232939 | 0.033511  | -0.359934 | 0.135666  | -0.761702 | 0.140517  | 0.266757  | -0.516636 | 0.121546  | 0.197111  | -0.059645 |
| Cj0191 | 1 | 0.15056   | -0.005782 | -0.271775 | 0.168     | -0.121079 | 0.316841  | 0.244887  | -0.050204 | 0.260507  | 0.309409  | -0.053045 |
| Cj0192 | 1 | 0.041804  | -0.055291 | -0.244856 | 0.411535  | -0.253257 | 0.297485  | 0.420186  | -0.063409 | 0.314523  | 0.348686  | -0.393463 |
| Cj0193 | 1 | -0.10036  | -0.057692 | -0.288946 | -0.082072 | -0.520356 | -0.048711 | 0.108089  | -0.44969  | 0.1149    | 0.122474  | 0.139469  |
| Cj0194 | 1 | -0.054093 | -0.062505 | -0.0432   | -2.437526 | -0.146883 | -0.099124 | 0.185105  | -0.11857  | 0.04977   | 0.05464   | 0.186247  |
| Cj0195 | 1 | -0.151683 | -0.003322 | -0.466935 | 0.435735  | -0.711701 | 0.108357  | 0.182438  | -1.11904  | 0.259423  | 0.184217  | -0.312223 |
| Cj0196 | 1 | -0.209895 | -0.067788 | -0.443399 | 0.543496  | -0.644082 | 0.093019  | -0.048711 | -0.481163 | 0.16543   | 0.115965  | -0.420627 |
| Cj0197 | 1 | -0.207894 | -0.065219 | -0.438307 | -0.085435 | -0.940922 | 0.059355  | 0.143785  | -0.561281 | 0.169284  | 0.048236  | -0.191986 |
| Cj0198 | 1 | -0.096962 | -0.024003 | -0.354022 | -0.063861 | -0.279284 | 0.123136  | 0.196859  | -0.272123 | 0.162726  | 0.1137    | 0.025454  |
| Cj0199 | 1 | 0.181802  | -0.224317 | -0.22398  | 0.044184  | -0.103612 | 0.104605  | 0.261832  | 0.049491  | -0.023416 | 0.076969  | 0.267116  |
| Cj0200 | 1 | 0.123799  | -0.057091 | -0.354575 | 0.402504  | -0.561068 | 0.285225  | 0.343351  | -0.509225 | 0.2949    | 0.218471  | 0.015212  |
| Cj0201 | 1 | 0.01564   | -0.377819 | 0.106482  | -0.241612 | -0.135428 | 0.088006  | 0.09356   | -0.263265 | 0.043345  | 0.085833  | 0.142348  |
| Cj0202 | 1 | 0.101785  | -0.306145 | -0.631735 | -0.184589 | -0.613962 | 0.165172  | 0.303109  | -0.923304 | 0.052277  | 0.125387  | 0.228234  |
| Cj0203 | 1 | 0.037453  | -0.050801 | 0.007626  | -0.019317 | 0.078883  | 0.171079  | 0.28558   | 0.035202  | -0.045878 | 0.03689   | 0.053111  |
| Cj0204 | 1 | -0.089421 | 0.012783  | -0.044241 | 0.215741  | 0.016924  | 0.222681  | 0.001298  | 0.182057  | 0.164014  | 0.222063  | -0.040378 |
| Cj0205 | 1 | -0.11904  | -0.03416  | -0.416    | -0.047666 | -0.409661 | -0.06115  | 0.038155  | -0.290886 | 0.019773  | -0.06809  | -0.045878 |
| Cj0206 | 1 | -0.038599 | 0.020484  | -0.573682 | -0.045134 | -0.413692 | 0.092072  | 0.061845  | -0.379695 | 0.011925  | 0.044744  | -0.035047 |
| Cj0207 | 1 | -0.062656 | -0.009553 | -0.725947 | 0.222928  | -0.907251 | 0.297133  | 0.44297   | -0.796862 | 0.338339  | 0.104605  | -0.691057 |
| Cj0208 | 1 | -0.534914 | -0.054542 | 0.133827  | -0.001588 | 0.263034  | 0.163112  | -0.063108 | 0.28629   | -0.11904  | 0.050745  | -0.008392 |

exbB1

exbD1

tonB1

foIE

fill

bacA

thrS

infC

|        |   |           |           |           |           |           |           |           |           |           |           |           |
|--------|---|-----------|-----------|-----------|-----------|-----------|-----------|-----------|-----------|-----------|-----------|-----------|
| Cj0209 | 1 | -0.168123 | -0.578198 | 0.156008  | -0.499198 | 0.396379  | -0.107182 | -0.309002 | 0.110898  | -0.517668 | -0.065672 | -0.01844  |
| Cj0210 | 1 | 0.016211  | 0.02219   | -0.347215 | -0.191656 | -0.436159 | -0.015228 | -0.022977 | -0.374075 | -0.187379 | -0.024443 | 0.062536  |
| Cj0211 | 1 | 0.043624  | -0.014645 | -0.349787 | -0.104387 | -0.54962  | 0.085833  | 0.08134   | -0.832899 | -0.128314 | 0.059217  | 0.00777   |
| Cj0212 | 1 | -0.160685 | -0.190009 | -0.107959 | 0.046701  | 0.153157  | -0.104077 | -0.048711 | 0.326652  | -0.099742 | 0.035342  | -0.150721 |
| Cj0213 | 1 | -0.074001 | -0.470329 | 0.135404  | -0.787617 | 0.432853  | -0.299383 | -0.366429 | 0.122076  | -0.625934 | -0.269338 | -0.14003  |
| Cj0214 | 1 | -0.059495 | -0.347766 | -0.47333  | -0.929885 | -0.648598 | -0.503487 | -0.318686 | -0.606035 | -1.201576 | -0.318866 | 0.004609  |
| Cj0215 | 1 | -0.079326 | -0.256356 | -0.022244 | -0.177719 | -0.049308 | -0.173319 | -0.065521 | 0.114767  | -0.429731 | -0.183277 | 0.031395  |
| Cj0216 | 1 | -0.142576 | 0.060601  | 0.271904  | -0.151362 | 0.354001  | -0.169582 | -0.346298 | 0.350837  | -0.491876 | -0.382325 | -0.201742 |
| Cj0217 | 1 | -0.236164 | -0.019463 | -0.351258 | -0.12422  | -0.377632 | 0.108759  | 0.091937  | -0.493093 | -0.040675 | 0.009491  | -0.275262 |
| Cj0218 | 1 | -0.104697 | -0.108892 | -0.25515  | -0.326986 | 0.104739  | -0.072331 | -0.000144 | -0.129576 | -0.214408 | -0.161976 | 0.005903  |
| Cj0219 | 1 | -0.343549 | -0.21927  | -0.886033 | -0.174784 |           | -0.089728 | -0.036822 | -0.238715 | -0.347582 | -0.106405 | 0.152248  |
| Cj0220 | 1 | -0.275437 | 0.156267  | 0.307079  | 1.706022  | 0.455439  |           | -0.419276 | 0.342669  |           | -0.25257  | 0.019773  |
| Cj0221 | 1 | 0.006765  | -0.156981 | 0.155102  | -0.964939 | 0.26123   | -0.209061 | -0.517668 | 0.22367   | -1.768076 | -0.304362 | -0.041269 |
| Cj0222 | 1 | -0.197269 | -0.207894 | 0.222063  | -1.139236 | 0.347666  | -0.547932 | -0.454032 | 0.028993  |           | -1.116848 | 0.1644    |
| Cj0223 | 1 | 0.040402  | -0.105784 | -0.101289 | -0.643856 | -0.184752 | -1.054692 | -0.128156 | 0.235482  | -1.703689 | -0.151683 | 0.093556  |
| Cj0224 | 1 | -0.081308 | 0.044044  | 0.133695  | -0.103457 | 0.229711  | 0.016782  | -0.141939 | 0.291132  | 0.151339  | 0.001874  | -0.21073  |
| Cj0225 | 1 | -0.304362 | -0.518081 | 0.244522  | -0.529489 | 0.175045  | 0.037031  | -0.639355 | 0.07738   | -0.47333  | -0.213069 | -0.36829  |
| Cj0226 | 1 | -0.086201 | 0.005903  | 0.125387  | -0.114972 | 0.27035   | -0.041863 | -0.068998 | -0.003467 | -0.11904  | -0.09619  | -0.187543 |
| Cj0227 | 1 | -0.151202 | -0.012897 | 0.308011  | 0.041944  | 0.368712  | -0.010425 | 0.122076  | 0.04712   | -0.04112  | -0.087274 | -0.381761 |
| Cj0228 | 1 | -0.04439  | 0.147828  | 0.330673  | -0.378944 | 0.579759  | 0.114634  | -0.026793 | 0.323197  | -0.21491  | 0.232906  | 0.027012  |
| Cj0229 | 1 | -0.006217 | -0.041417 | -0.299915 | 0.200128  | -0.612637 | 0.23217   | 0.120883  | -0.257218 | 0.125254  | 0.224534  | -0.114972 |
| Cj0230 | 1 | -0.081919 | -0.076889 | 0.005472  | 0.023752  | 0.103665  | 0.135798  | 0.1956    | -0.026499 | -0.062354 | 0.053528  | -0.027969 |
| Cj0231 | 1 | 0.086376  | -0.08024  | 0.102188  | -0.124849 |           | -0.071876 | 0.051581  | 0.157691  | -0.246224 | 0.07382   | -0.119981 |
| Cj0232 | 1 | 0.025029  | 0.301354  | 0.19333   | -0.098351 | 0.317767  | 0.132774  | 0.02772   | 0.413811  | 0.168129  | 0.103531  | -0.292122 |
| Cj0233 | 1 | -0.00231  | 0.191815  | -0.309717 | -0.541408 | -0.172018 | -0.000722 | -0.286128 | -0.042605 | -0.306323 | -0.076889 | -0.49289  |
| Cj0234 | 1 | -0.047368 | 0.020342  | -0.164076 | -0.055142 | 0.041383  | 0.072998  | 0.110096  | -0.018586 | 0.025596  | 0.103128  | -0.019755 |
| Cj0235 | 1 | 0.218223  | 0.141564  | -0.098351 | -0.130365 | -0.064163 | 0.034216  | -0.142576 | 0.115166  | -0.032241 | 0.086784  | -0.179678 |
| Cj0236 | 1 | 0.206893  | 0.521754  | 0.124857  | -0.007957 | 0.393306  | 0.076833  | 0.108625  | 0.273934  | 0.154972  | 0.254957  | 0.057277  |
| Cj0237 | 1 | 0.098689  | -0.01217  | -0.34172  | 0.253384  | -0.338068 | 0.317883  | 0.194213  | -0.380446 | 0.413486  | 0.414785  | -0.0836   |
| Cj0238 | 1 | -0.131471 | 0.065159  | -0.216418 | 0.064745  | -0.279459 | 0.136585  | 0.061292  | -0.265518 | 0.111165  | 0.173895  | 0.138945  |
| Cj0239 | 1 | 0.127369  | -0.016395 | -0.029883 | 0.396817  | 0.183074  | 0.170181  | 0.510253  | 0.079975  | 0.345283  | 0.182184  | -0.653128 |
| Cj0240 | 1 | 0.107554  | 0.232292  | 0.20389   | 0.046701  | 0.319502  | 0.109561  | 0.116764  | 0.257493  | 0.227987  | -0.01028  | 0.35095   |
| Cj0241 | 1 | 0.12499   | -0.049457 | -0.713592 | -0.001155 | -0.785129 | -0.077954 | 0.20063   | -0.360305 | 0.458382  | 0.336969  | 0.317651  |
| Cj0242 | 1 | 0.227248  | -0.10967  | 0.167872  | -0.020779 | -0.003756 | -0.236673 | 0.181293  | 0.00317   | 0.051998  | 0.19333   | 0.280719  |
| Cj0243 | 1 | 0.053111  | 0.004609  | -0.666118 | 0.373063  | -0.559792 | 0.140386  | 0.268913  | -0.495329 | 0.406428  | 0.460376  | -0.022537 |

argC

argB

argD

cynT

|        |      |   |           |           |           |           |           |           |           |           |           |           |           |
|--------|------|---|-----------|-----------|-----------|-----------|-----------|-----------|-----------|-----------|-----------|-----------|-----------|
| Cj0244 | rpmI | 1 | 0.217851  | 0.00389   | -0.466935 | 0.40294   | -0.679689 | 0.020058  | -0.136062 | -0.176903 | 0.309991  | 0.420833  | -0.046921 |
| Cj0245 | rpIT | 1 | 0.281669  | -0.256873 | -0.120608 | -0.238374 | -0.093879 | -0.432844 | -0.03623  | -0.261535 | -0.060096 | 0.023326  | 0.287118  |
| Cj0246 |      | 1 | 0.247077  | 0.013069  | -0.460171 | -0.064616 | -0.351811 | -1.215915 | 0.234869  | -0.323552 | 0.195222  | 0.276318  | 0.187641  |
| Cj0247 |      | 1 | 0.055473  | -0.226679 | 0.03083   | 0.033934  | 0.085153  | 0.089498  | 0.161823  | 0.109026  | 0.082021  | 0.189413  | 0.055473  |
| Cj0248 |      | 1 | 0.285343  | 0.168899  | -0.061451 | 0.228603  | 0.041103  | 0.179766  | 0.184471  | 0.299714  | 0.210638  | 0.258579  | 0.077106  |
| Cj0249 |      | 1 | 0.172616  | -0.30365  | 0.033511  | -0.238204 | -0.061601 | 0.043624  | -0.084211 | -0.109826 | 0.079975  | 0.17645   | 0.004178  |
| Cj0250 |      | 1 | 0.160533  | -0.054992 | -0.552156 | -0.029883 | -0.581432 | 0.208018  | 0.311852  | -0.840371 | 0.097611  | 0.268434  | -0.171044 |
| Cj0251 |      | 1 | 0.131985  | -0.028705 | -0.375384 | 0.186247  | -0.228537 | 0.140255  | 0.25181   | -0.108736 | 0.152508  | 0.276675  | 0.045862  |
| Cj0252 | moaC | 1 | 0.079429  | 0.013069  | 0.097611  | 0.237686  | 0.136323  | 0.096397  | 0.107688  | 0.298424  | 0.260387  | 0.19862   | -0.129892 |
| Cj0253 |      | 1 | -0.002888 | -0.013334 | -0.488026 | 0.050188  | -0.798115 | 0.049073  | 0.242938  | -0.690358 | 0.134352  | 0.128029  | -0.246567 |
| Cj0254 |      | 1 | -0.062053 | -0.03697  | -0.133211 | -0.135269 | -0.303828 | 0.099228  | -0.004335 | -0.097733 | -0.112163 | -0.002599 | -0.00231  |
| Cj0255 |      | 1 | 0.101381  | 0.03956   | -0.393274 | 0.063641  | -0.405834 | 0.161952  | 0.134352  | -0.381949 | -0.005058 | 0.146525  | 0.018492  |
| Cj0256 |      | 1 | 0.118626  | -0.01028  | 0.058386  | 0.18574   | 0.198494  | 0.025738  | -0.102527 | 0.183963  | 0.051024  | 0.109427  | 0.022332  |
| Cj0257 | dgkA | 1 | -0.015228 | -0.060849 | -0.259116 | 0.095452  | -0.308109 | 0.078883  | -0.053194 | -0.019463 | 0.128953  | 0.074916  | -0.003177 |
| Cj0258 |      | 1 | 0.159242  | -0.403733 | 0.123931  | -0.358824 | 0.305679  | -1.136379 | 0.0782    | 0.024745  | -0.645661 | -0.038006 | 0.074642  |
| Cj0259 | pyrC | 1 | 0.187768  | -0.016979 | -0.21927  | 0.138683  | -0.399159 | -1.868279 | 0.210015  | 0.038998  | 0.110764  | 0.168257  | 0.014212  |
| Cj0260 |      | 1 | 0.1121    | -0.006072 | 0.004322  | 0.125519  | 0.110631  | -2.264651 | 0.09126   | 0.324465  | 0.192573  | 0.332278  | 0.010064  |
| Cj0261 |      | 1 | 0.194717  | -0.385337 | 0.200128  | -0.349052 | 0.268913  | -0.480559 | -0.132578 | 0.113567  | -0.135745 | 0.002018  | -0.155534 |
| Cj0262 |      | 1 | -0.117631 | -0.050951 | -0.122491 | 0.006334  | -0.067636 | -0.17397  | 0.223052  | -0.205896 | 0.007483  | 0.052555  | -0.074912 |
| Cj0263 |      | 1 | 0.330788  | -0.096807 | 0.155231  | 0.045303  | 0.215119  | -5.227016 | -0.270208 | 0.113034  | -0.339345 | -0.345564 | 0.003026  |
| Cj0264 |      | 1 | 0.051859  | 0.046282  | -0.069149 | 0.262794  | 0.005184  | -6.795859 | -3.859352 | 0.232047  | 0.277033  | -0.114816 | -0.120922 |
| Cj0265 |      | 1 | -0.404878 | -0.346665 | 0.036609  | -0.21491  | -0.1938   | -1.270208 | -1.337521 | 0.127501  | 0.029135  | -0.165208 | -0.253429 |
| Cj0266 |      | 1 | 0.113034  | -0.043795 | -0.181968 | -0.031356 | -0.034604 | -0.148961 | -0.03357  | -0.029735 | -0.034899 | -0.011297 | 0.06695   |
| Cj0267 |      | 1 | -0.029735 | 0.031819  | -0.055441 | -0.097733 |           | -0.171368 | -0.25257  | -0.374449 | -0.065068 | -0.011588 | -0.109203 |
| Cj0268 |      | 1 | 0.059632  | 0.012354  | -0.006217 | 0.173383  | -0.349235 | 0.107286  | -0.107337 | -0.211398 | 0.118758  | 0.137372  | 0.134484  |
| Cj0269 |      | 1 | 0.09842   | -0.15441  | 0.07738   | -0.025911 | 0.019631  | 0.199248  | -0.174296 | 0.061292  | 0.05325   | 0.015926  | -0.124534 |
| Cj0270 |      | 1 | 0.135535  | 0.012068  | -0.403542 | -0.011443 | -0.438307 | -0.008392 | -0.077193 | -0.240759 | 0.06984   | 0.064331  | 0.098554  |
| Cj0271 |      | 1 | 0.016211  | 0.029983  | -0.307037 | 0.084745  | -0.470929 | -0.083447 | 0.048794  | -0.402397 | 0.038577  | 0.121811  | 0.005903  |
| Cj0272 |      | 1 | 0.129217  | 0.234379  | 0.023184  | 0.051302  | 0.11703   | -0.076585 | -0.064767 | 0.305795  | 0.078337  | 0.11929   | 0.038998  |
| Cj0273 | fabZ | 1 | 0.000433  | -0.036822 | 0.073546  | 0.00992   | -0.182786 | 0.183074  | -0.088807 | 0.046142  | 0.005472  | -0.110449 | -0.02415  |
| Cj0274 | lpxA | 1 | 0.157691  | -0.081156 | -0.083906 | -0.336428 | -0.25515  | -0.120294 | -0.147681 | -0.095882 | -0.522012 | -0.119981 | 0.108892  |
| Cj0275 | clpX | 1 | 0.018207  | 0.059632  | -0.288417 | -0.165046 | -0.107337 | -0.159879 | -0.003467 | -0.402397 | -0.069452 | -0.029294 | -0.071724 |
| Cj0276 | mreB | 1 | 0.040121  | 0.336398  | 0.139862  | -0.517668 | 0.196481  | -0.80869  | -0.138759 | 0.314174  | -0.529906 | -0.032536 | 0.092749  |
| Cj0277 |      | 1 | 0.025029  | -0.016249 | -0.028705 | 0.126048  | -0.128945 | 0.108759  | 0.007052  | 0.026588  | 0.126048  | 0.136323  | -0.032684 |
| Cj0278 |      | 1 | -0.053045 | 0.04684   | 0.174918  | 0.004897  | 0.264476  | 0.03492   | 0.1133    | -0.021658 | 0.0397    | 0.108223  | 0.202637  |



|        |   |           |           |           |           |           |           |           |           |           |           |           |
|--------|---|-----------|-----------|-----------|-----------|-----------|-----------|-----------|-----------|-----------|-----------|-----------|
| Cj0279 | 1 | 0.090989  | -0.013917 | -0.256528 | 0.146655  | -0.35679  | 0.003746  | 0.146264  | 0.006908  | 0.090718  | 0.005041  | 0.056167  |
| Cj0280 | 1 | 0.144699  | 0.028145  | 0.038155  | 0.164786  | 0.176961  | 0.268315  | 0.191436  | 0.290306  | 0.243425  | 0.183582  | 0.119688  |
| Cj0281 | 1 | 0.034497  | -0.013043 | -0.470529 | 0.092884  | -0.684086 | 0.393526  | 0.026304  | -0.175273 | 0.337083  | 0.361544  | -0.118257 |
| Cj0282 | 1 | -0.123905 | 0.035765  | 0.045443  | 0.037874  | 0.186247  | 0.167486  | 0.113967  | -0.023416 | -0.050502 | -0.062505 | 0.122076  |
| Cj0283 | 1 | 0.402176  | 0.641546  | 0.207268  | 1.680819  | 0.418892  | 1.092816  | 2.177312  | 0.231801  | 1.319676  | -1.638007 | 0.708231  |
| Cj0284 | 1 | 0.239642  | 0.03337   | -0.252913 | 0.163499  | -0.198262 | 0.194591  | 0.16543   | -0.069301 | 0.179256  | 0.080658  | 0.453017  |
| Cj0285 | 1 | 0.103128  | 0.328836  | -0.241612 | 0.060047  | -0.39498  | 0.181421  | 0.060324  | -0.155373 | 0.124725  | 0.043204  | 0.118758  |
| Cj0286 | 1 | 0.100305  | -0.002888 | -0.243489 | 0.188274  | -0.421786 | 0.178109  | 0.370834  | -0.054392 | 0.243791  | 0.245374  | 0.284633  |
| Cj0287 | 1 | 0.345056  | -0.053494 | -0.485802 | 0.391878  | -0.558517 | 0.230695  | 0.415975  | -0.253945 | 0.453017  | 0.285816  | -0.15441  |
| Cj0288 | 1 | 0.608904  | 0.536749  | 0.131458  | 0.277628  | 0.365245  | 0.018064  | 0.218967  | 0.363564  | 0.218223  | 0.210389  | 0.456491  |
| Cj0289 | 1 | 0.067776  | -0.277709 | 0.15017   | -0.627494 | 0.181166  | -0.130839 | -0.102527 | 0.007196  | -0.165046 | -0.196277 | 0.494876  |
| Cj0290 | 1 | 0.096667  | -0.387978 | 0.036187  | -0.229382 | -0.018878 | -0.077498 | 0.077927  | -0.092494 | -0.214742 | -0.039785 | 0.279055  |
| Cj0291 | 1 | 0.036749  | -0.048561 | 0.032383  | 1.45096   | 0.318577  | -0.262919 | -0.165208 | 0.043204  | -0.24708  | -0.787866 | 0.334454  |
| Cj0292 | 1 | 0.096532  | -0.099742 | -0.116223 | 0.260989  | 0.058801  | 0.09356   | -0.099587 | 0.229342  | -0.129734 | 0.064193  | 0.110764  |
| Cj0293 | 1 | 0.189919  | -0.430898 | 0.089227  | -0.357899 | -0.140348 | -0.021951 | -0.059044 | -0.115129 | -0.069149 | -0.119824 | 0.094506  |
| Cj0294 | 1 | 0.518031  | -0.107337 | 0.156785  | 1.13652   | 0.335255  | 1.445409  | 1.58376   | -0.058593 | 0.072037  | 0.834388  | 0.56881   |
| Cj0295 | 1 | -0.189516 | -0.919752 | 0.012497  | -0.544771 | 0.341075  | -1.769551 | 0.071763  | 0.132774  | -0.296013 | 0.072037  | -0.059796 |
| Cj0296 | 1 | 0.123931  | -0.373514 | 0.194465  | 0.127765  | 0.426104  | -0.614624 | 0.098958  | 0.233765  | -0.097888 | 0.018349  | 0.228234  |
| Cj0297 | 1 | 0.045303  | -0.652221 | -0.178535 | -0.368104 | -0.325901 | -0.452451 | -0.046474 | -0.277709 | -0.225498 | -0.197765 | 0.3744    |
| Cj0298 | 1 | 0.14509   | -0.052745 | -0.044092 | -0.064616 | -0.242977 | -0.272994 | 0.183709  | -0.113723 | -0.070209 | -0.192645 | 0.275603  |
| Cj0299 | 1 | 0.09329   | -1.383831 | -0.029294 | 0.130536  | -0.07309  | -2.070967 | 0.08624   | 0.074368  | -0.086967 | 0.006334  | 0.112767  |
| Cj0300 | 1 | 0.10165   | -1.113411 | 0.020484  | 0.421371  | 0.048655  | -2.130365 | -0.170881 | 0.158337  | -0.24708  | 0.08692   | 0.063089  |
| Cj0301 | 1 | 0.095182  | -0.786871 | -0.367546 | -0.090649 | -0.239566 | -1.079173 | -0.171368 | -0.037266 | 0.097341  | 0.156785  | 0.028852  |
| Cj0302 | 1 | 0.1145    | -0.403542 | -0.357345 | -0.01057  | -0.288593 | -1.300093 | 0.128821  | -0.294597 | 0.001154  | 0.03196   | 0.063227  |
| Cj0303 | 1 | 0.122474  | -1.201576 | 0.133958  | 0.101247  | 0.388906  | -1.448115 | 0.076833  | 0.218223  | -0.076889 | -0.436549 | 0.001298  |
| Cj0304 | 1 | 0.080112  | -0.172506 | -0.18705  | 0.144307  | -0.349052 | -1.108425 | 0.079429  | 0.07382   | -0.005927 | 0.077243  | -0.333153 |
| Cj0305 | 1 | 0.218595  | -0.600337 | 0.309758  | 0.4654    | -1.743231 | -0.792357 | 0.141302  | 0.141302  | 3.144993  | 0.300417  | -1.59031  |
| Cj0306 | 1 | 0.179638  | -0.056641 | -0.372393 | -1.547932 | -0.763416 | -1.329522 | 0.041383  | -0.510868 | 0.099228  | 0.095722  | -1.774478 |
| Cj0307 | 1 | 0.045583  | -0.294066 | 0.27739   | -0.328978 | 0.409472  | -0.710992 | 0.02432   | 0.178237  | -0.971997 | -0.112475 | -0.131629 |
| Cj0308 | 1 | 0.166201  | 0.22033   | 0.195852  | 0.092207  | 0.495081  | 0.190046  | -0.124063 | 0.361768  | -0.096962 | 0.1141    | -0.158429 |
| Cj0309 | 1 | 0.011639  | -0.225666 | -0.574326 | -0.36086  | -1.090803 | 0.012068  | -0.115754 | -0.929061 | -0.242977 | -0.137965 | -0.161976 |
| Cj0310 | 1 | 0.119821  | -0.108425 | -0.355313 | -0.765131 | -0.524085 | -0.346481 | -0.132736 | -0.426819 | -0.414653 | -0.172506 | 0.045024  |
| Cj0311 | 1 | 0.164658  | 0.004034  | 0.120219  | 0.167743  | 0.379399  | 0.042084  | 0.182819  | 0.249142  | 0.073957  | 0.08243   | -0.090957 |
| Cj0312 | 1 | 0.140255  | 0.023042  | 0.192573  | 0.207018  | 0.465609  | 0.225522  | 0.094912  | 0.309758  | 0.039981  | 0.081612  | -0.027675 |
| Cj0313 | 1 | -0.208394 | -0.013189 | -0.332426 | -0.126108 | -0.423526 | -0.159074 | -0.086201 | -0.230228 | 0.051163  | 0.026588  | -0.28736  |

carB

surE

bioA

pth

|        |      |   |           |           |           |           |           |           |           |           |           |           |           |
|--------|------|---|-----------|-----------|-----------|-----------|-----------|-----------|-----------|-----------|-----------|-----------|-----------|
| Cj0314 | lysA | 1 | -0.065974 | -0.245882 | -0.237354 | -0.296013 | 0.061845  | 0.047678  | -0.067636 | -0.096499 | -0.271426 | -0.178698 | 0.089769  |
| Cj0315 |      | 1 | -0.147202 | 0.014212  | 0.221444  | 0.021764  | -0.040527 | 0.102591  | 0.204015  | 0.66102   | 0.045723  | 0.0719    | 0.023894  |
| Cj0316 | pheA | 1 | -0.104697 | 0.097611  | 0.334683  | -0.289298 | 0.591201  | -0.120137 | -0.302582 | 0.389016  | -0.68571  | -0.135269 | 0.134484  |
| Cj0317 | hisC | 1 | -0.348317 | -0.491876 | -0.209395 | -0.192645 | -0.452057 | -0.030619 | -0.571536 | -0.082072 | -0.161169 | -0.140189 | -0.124849 |
| Cj0318 | flfF | 1 | -0.029588 | -0.237183 | -0.065521 | -1.418119 | 0.239154  | 0.283922  | -0.128314 | 0.044604  |           | -0.215747 | 0.237074  |
| Cj0319 | flfG | 1 | -0.029441 | -0.240759 | 1.092004  | -0.06537  | -1.595097 | -0.068393 | 0.030265  |           | -0.424881 | 0.029559  | 0.117163  |
| Cj0320 | flfH | 1 | 0.016782  | 0.009204  | 0.082294  | 0.186374  | 0.077927  | 0.190804  | 0.163885  | 0.192194  | 0.217355  | 0.116764  | -0.091879 |
| Cj0321 | dxs  | 1 | -0.248965 | -0.379132 | -0.255494 | -1.504714 | -0.653582 | -0.665889 | -0.603841 | -0.32265  | 2.86922   | -0.158751 | 0.088684  |
| Cj0322 | perR | 1 | 0.222557  | -0.069906 | -0.829306 | -0.548776 | -1.005493 | -0.528448 | -0.137489 | -1.07036  | -0.828537 | 0.008343  | 0.152508  |
| Cj0323 |      | 1 | 0.091937  | 0.033511  | 0.037031  | 0.105946  | 0.028286  | 0.115033  | 0.07286   | 0.08787   | 0.176706  | 0.147697  | 0.028569  |
| Cj0324 | ubiE | 1 | 0.011925  | 0.043484  | 0.044184  | 0.494057  | 0.129481  | 0.087599  | 0.377401  | 0.123666  | 0.295723  | 0.030689  | -0.403733 |
| Cj0325 | xseA | 1 | 0.044044  | 0.012211  | -0.221455 | -0.114035 | -0.114816 | 0.0202    | -0.112319 | -0.042605 | -0.041714 | 0.033229  | -0.13622  |
| Cj0326 | serC | 1 | -0.089881 | 0.013784  | -0.564051 | 0.462995  | -0.903738 | 0.181293  | 0.50457   | -1.040378 | 0.319271  | 0.1121    | -0.442614 |
| Cj0327 |      | 1 | 0.14965   | 0.121281  | -0.233956 | 0.09126   | -0.040082 | 0.012211  | 0.023184  | 0.420725  | -0.030619 | 0.080794  | 0.108759  |
| Cj0328 |      | 1 | 0.240742  | 0.144177  | 0.044604  | 0.192068  | 0.066675  | 0.178237  | 0.105008  | 0.300299  | 0.126841  | 0.070115  | 0.228849  |
| Cj0329 |      | 1 | 0.010064  | 0.382833  | 0.096936  | 1.296957  | 0.147437  |           | 5.547185  | -0.024443 | 1.513541  | -0.867489 | -0.068846 |
| Cj0330 |      | 1 | -0.075216 | 0.221939  | 0.146003  |           | 0.19333   | -0.038154 | -0.334425 | 0.024603  | 0.67726   | -0.208561 | 0.126973  |
| Cj0331 |      | 1 | 0.238909  | 0.000433  | -0.511279 | 0.097611  | -0.419855 | 0.117961  | 0.056167  | -0.198262 | 0.068877  | 0.141825  | 0.302173  |
| Cj0332 |      | 1 | 0.192952  | 0.571046  | -0.022097 | -0.062053 | 0.079429  | 0.042504  | -0.02034  | 0.338339  | -0.02459  | 0.057831  | 0.343578  |
| Cj0333 |      | 1 | -0.011152 | 0.241352  | 0.16337   |           | 0.077653  | -0.262054 | -0.27282  | -0.135586 | -2.405069 | -0.072938 | -0.15457  |
| Cj0334 | ahpC | 1 | -0.047368 | -0.106715 | 0.051024  | -0.114191 | 0.293959  | 0.127369  | 0.145612  | -0.006797 | -0.196773 | -0.152805 | 0.085425  |
| Cj0335 | flhB | 1 | 0.216486  | 0.141825  | -0.115754 | -0.140666 | -0.056491 | -0.03934  | 0.251689  | 0.067501  | -0.619271 | -0.097888 | 0.198746  |
| Cj0336 |      | 1 | 0.182184  | 0.00101   | 0.310456  | 0.256407  | 0.278698  | 0.183074  | 0.277271  | 0.488001  | 0.27965   | 0.083928  | 0.172872  |
| Cj0337 |      | 1 | -0.086661 | -0.254634 | -0.0145   | -0.248965 | -0.400301 | -0.01217  | 0.009204  | -0.088807 | 0.124857  | 0.000721  | 0.259664  |
| Cj0338 |      | 1 | -0.053494 | -0.049308 | -0.277884 | -0.086201 | -0.443399 | 0.138945  | 0.147046  | -0.195451 | 0.081885  | 0.237441  | 0.254836  |
| Cj0339 |      | 1 | -0.187543 | 0.024603  | -0.361231 | -0.008247 | -0.571322 | 0.118227  | 0.05797   | -0.482976 | -0.080698 | 0.006765  | 0.174534  |
| Cj0340 |      | 1 | -0.761702 | 0.76545   | 0.252052  | 2.607224  | 0.42503   |           | -0.191821 | 0.266157  | 2.777872  | 1.130799  | 0.358396  |
| Cj0341 |      | 1 | -0.009989 | -0.52367  | -0.179841 | -0.335699 | -0.328978 | -0.127526 | -0.10827  | -0.29814  | -0.051399 | -0.060849 | 0.222805  |
| Cj0342 |      | 1 | -0.024883 | -0.401635 | 0.1396    | -0.148961 | 0.282262  | -0.053045 | 0.142348  | 0.01264   | -0.225835 | -0.080698 | 0.280125  |
| Cj0343 |      | 1 | 0.027012  | -0.312402 | -0.288241 | 0.020484  | -0.468132 | 0.089363  | 0.227125  | 0.015783  | -0.18968  | 0.024178  | 0.025738  |
| Cj0344 |      | 1 | 0.022474  | 0.301119  | 0.275007  | 0.074916  | 0.570851  | 0.064055  | -0.088654 | 0.288299  | -0.055291 | 0.136979  | 0.118626  |
| Cj0345 | trpE | 1 | -0.009699 | -0.345564 | -0.207728 | -0.223475 | -0.186229 | 0.002739  | 0.00173   | -0.116379 | -0.07628  | 0.033511  | 0.282973  |
| Cj0346 | trpD | 1 | 0.079702  | -0.229551 | 0.110363  | -0.977952 | 0.0942    | -0.316708 | -0.060247 | 0.015783  | -0.618827 | -0.351258 | 0.257373  |
| Cj0347 | trpF | 1 | 0.08243   | -0.075368 | -0.189187 | -0.233786 | -0.325178 | -0.147681 | -0.140826 | -0.053943 | -0.54372  | -0.216921 | 0.169797  |
| Cj0348 | trpB | 1 | -0.011733 | -0.020779 | -0.188858 | 0.071076  | -0.139395 | -0.078259 | -0.268122 | 0.226509  | -0.176251 | 0.0202    | 0.038717  |

|        |      |   |           |           |           |           |           |           |           |           |           |           |           |
|--------|------|---|-----------|-----------|-----------|-----------|-----------|-----------|-----------|-----------|-----------|-----------|-----------|
| Cj0349 | trpA | 1 | -0.002021 | -0.095265 | -0.175436 | -0.349052 | -0.213738 | -0.226341 | -0.236843 | -0.109514 | -0.25515  | -0.157303 | 0.028993  |
| Cj0350 |      | 1 | 0.050745  | -0.141621 | -0.298495 | -0.458188 | -0.415807 | -0.312939 | -0.171693 | -0.271426 | -0.279634 | -0.163429 | 0.076012  |
| Cj0351 | fljN | 1 | 0.108491  | 0.038155  | -0.751465 | 0.287118  | -1.048711 | 0.261591  | 0.464877  | -1.21491  | 0.397693  | 0.396159  | -0.514161 |
| Cj0352 |      | 1 | 0.171079  | 0.031536  | 0.241352  | -0.010425 | 0.294665  | -0.041417 | 0.0397    | 0.387032  | 0.138421  | 0.218223  | -0.111383 |
| Cj0353 |      | 1 | 0.198368  | 0.015498  | -0.689195 | 0.048097  | -0.816291 | 0.169925  | 0.033793  | -0.379695 | 0.222681  | 0.084064  | 0.052277  |
| Cj0354 |      | 1 | 0.300534  | -0.003756 | -0.550254 | 0.019204  | -0.704865 | 0.180275  | 0.130008  | -0.472529 | 0.14091   | 0.177854  | 0.170566  |
| Cj0355 |      | 1 | 0.279768  | 0.022332  | 0.05464   | 0.208767  | 0.068877  | 0.306729  | 0.177344  | 0.136585  | 0.105946  | 0.272382  | 0.184471  |
| Cj0356 |      | 1 | 0.310573  | 0.027437  | -0.278059 | 0.194844  | -0.333334 | 0.188274  | 0.015069  | 0.239765  | 0.146003  | 0.126312  | 0.00906   |
| Cj0357 |      | 1 | 0.15782   | -0.021951 | -0.086661 | -0.104077 | 0.012497  | -0.015374 | 0.038858  | -0.044538 | 0.109561  | -0.03771  | 0.023326  |
| Cj0358 |      | 1 | 0.186374  | 0.043204  | -0.065974 | -0.237013 | -0.031651 | 0.041383  | -0.138283 | -0.165531 | -0.448115 | -0.310969 | 0.01564   |
| Cj0359 |      | 1 | 0.066537  | -0.214073 | 0.060739  | -0.166017 | -0.060247 | -0.140507 | -0.062053 | 0.128425  | -0.467134 | 0.041383  | -0.076585 |
| Cj0360 |      | 1 | -0.297786 | -0.155052 | -0.370154 | -0.038006 | -0.59837  | -0.025471 | -0.114191 | -0.489848 | -0.130208 | 0.066399  | -0.028558 |
| Cj0361 | lspA | 1 | -0.079021 | -0.074456 | -0.383454 | -0.121706 | -1.317606 | 0.103531  | -0.037414 | -0.667722 | -0.139713 | -0.148161 | -0.091264 |
| Cj0362 |      | 1 | 0.057416  | 0.028569  | -0.559154 | 0.016924  | -0.752194 | 0.257373  | 0.171207  | -0.754383 | 0.07738   | -0.010425 | -0.090803 |
| Cj0363 |      | 1 | 0.15782   | 0.040682  | 1.029064  | 0.244765  | 0.023468  | 0.367707  | 0.257011  | 2.317072  | 0.242694  | 0.082158  | 0.05325   |
| Cj0364 |      | 1 | 0.169155  | 0.024745  | -0.193965 | -0.026793 | -0.448312 | 0.167101  | 0.041103  | -0.060849 | 0.053945  | -0.002599 | -0.164238 |
| Cj0365 |      | 1 | -0.001588 | 0.003458  | -0.820362 | 0.008487  | -1.289122 | 0.154454  | 0.10541   | -1.39479  | 0.223793  | 0.126973  | -0.246395 |
| Cj0366 |      | 1 | 0.154324  | -0.01217  | -1.882039 | 0.032524  | -0.839338 | -0.065974 | 0.088142  | -0.908876 | 0.131063  | 0.059217  | 0.141171  |
| Cj0367 |      | 1 | 0.165044  | -0.041417 | -0.246909 | 0.599794  |           | 0.250719  | 0.439995  | -0.136537 | 0.54893   | 0.407842  | -0.137965 |
| Cj0368 |      | 1 | 0.223052  | 0.020769  | -0.565759 | 0.336969  | -0.454822 | 0.203765  | 0.172231  | -0.098969 | 0.418244  | 0.364012  | 0.067501  |
| Cj0369 |      | 1 | -0.070512 | 0.044184  | 0.03956   | -0.117318 | 0.025879  | 0.041103  | -0.096807 | 0.009777  | 0.04991   | 0.060877  | -0.04886  |
| Cj0370 | rpsU | 1 | 0.131326  | -0.410428 | -0.031946 | -1.467932 | -0.009553 | -0.211398 | 0.008917  | -0.054242 | -0.482775 | -0.263785 | 0.229219  |
| Cj0371 |      | 1 | 0.007339  | -0.08024  | -0.394221 | -0.224992 | -0.675074 | -0.20141  | 0.024178  | -0.04558  | -0.443595 | -0.079478 | 0.211386  |
| Cj0372 |      | 1 | -0.005203 | 0.098689  | -0.087274 | -0.877526 | -0.121079 | -0.248451 | -0.304719 | -0.044985 | -0.295305 | 0.006047  | -0.029883 |
| Cj0373 |      | 1 | 0.073683  | -0.031946 | -0.47694  | -0.049606 | -0.856215 | 0.096127  | -0.026058 | -0.758282 | 0.126709  | 0.099901  | -0.127841 |
| Cj0374 |      | 1 | -0.119824 | -0.006217 | -0.824188 | 0.548141  | -0.973979 | 0.221815  | 0.450274  | -1.352916 | 0.402722  | 0.270947  | -0.397068 |
| Cj0375 |      | 1 | 0.199248  | -0.058142 | -0.634419 | 0.215368  | -0.5041   | 0.173383  | 0.162597  | -0.465938 | 0.20063   | 0.220578  | 0.175812  |
| Cj0376 |      | 1 | 0.244887  | 0.004322  | -0.559579 | 0.362554  | -0.385149 | 0.259423  | 0.264717  | -0.259634 | 0.425137  | 0.364572  | 0.143002  |
| Cj0377 |      | 1 | -0.048114 | -0.037562 | -0.63554  | 0.243913  | -0.880179 | 0.202637  | 0.161823  | -0.524293 | 0.334339  | 0.207018  | -0.098969 |
| Cj0378 |      | 1 | -0.160847 | 0.076833  | -0.887367 | 0.191057  | -0.812232 | 0.147828  | 0.243913  | -0.774478 | 0.357045  | 0.174151  | 0.1333    |
| Cj0379 |      | 1 | 0.120219  | -0.01057  | -0.502464 | 0.420833  | -0.683159 | 0.195474  | 0.333882  | -0.279984 | 0.456386  | 0.280006  | -0.26067  |
| Cj0380 |      | 1 | -0.873291 | -0.072331 | -0.25257  | 0.324235  | -0.433428 | 0.323197  | 0.331591  | -0.074608 | 0.450908  | 0.41792   | 0.463936  |
| Cj0381 |      | 1 | -0.680845 | -0.388544 | -0.464743 | -0.056191 | -0.976248 | 0.109427  | -0.060548 | -0.80768  | 0.129349  | -0.07552  | -0.124063 |
| Cj0382 |      | 1 | -0.270034 | 0.028711  | -0.508198 | 0.155102  | -0.767585 | 0.187388  | 0.202512  | -0.348133 | 0.166844  | -0.105008 | 0.108089  |
| Cj0383 |      | 1 | -0.03003  | 0.007483  | -0.214575 | 0.048376  | 0.14091   | 0.04991   | 0.084609  | 0.082158  | 0.008343  | -0.102372 | 0.142479  |

|        |   |           |           |           |           |           |           |           |           |           |           |           |
|--------|---|-----------|-----------|-----------|-----------|-----------|-----------|-----------|-----------|-----------|-----------|-----------|
| Cj0384 | 1 | 0.065434  | 0.408277  | -0.199255 | 0.199248  | -0.290356 | 0.111031  | 0.186374  | 0.014927  | 0.253747  | 0.1038    | 0.095587  |
| Cj0385 | 1 | 0.03492   | -0.298673 | -0.023416 | -0.11904  | 0.003458  | 0.096936  | 0.026588  | 0.03196   | 0.105008  | -0.075064 | 0.255924  |
| Cj0386 | 1 | 0.101785  | -0.208061 | 0.190172  | -0.710756 | 0.19497   | -0.057542 | -0.04707  | -0.020926 | -0.484994 | -0.137807 | 0.283922  |
| Cj0387 | 1 | 0.035624  | 0.027862  | -0.297254 | 0.019773  | -0.504919 | 0.059355  | -0.05125  | -0.24366  | -0.195286 | 0.055057  | -0.036674 |
| Cj0388 | 1 | -0.000722 | 0.012354  | -0.049457 | 0.231432  | -0.090957 | 0.075875  | -0.187871 | 0.235114  | -0.464345 | 0.175045  | 0.062674  |
| Cj0389 | 1 | -0.069452 | -0.070663 | -0.337339 | -0.19512  | -0.466138 | 0.098824  | 0.02432   | -0.452254 | -0.191162 | 0.015498  | 0.038296  |
| Cj0390 | 1 | 0.019061  | 0.002018  | -0.583593 | 0.201006  | -0.823422 | 0.032947  | 0.356933  | -0.534705 | 0.412619  | 0.255803  | -0.417155 |
| Cj0391 | 1 | 0.014498  | -0.068393 | -0.085589 | 0.034638  | 0.028286  | 0.083928  | 0.22848   | 0.061845  | -0.143373 | -0.010134 | 0.097071  |
| Cj0392 | 1 | 0.181166  | 0.015498  | 0.025596  | 0.152638  | 0.118227  | 0.154713  | 0.041664  | 0.225275  | -0.024737 | 0.005759  | 0.188781  |
| Cj0393 | 1 | -0.056941 | 0.004609  | -0.619271 | 0.013498  | -0.948698 | 0.204767  | 0.140779  | -0.674383 | 0.411969  | 0.169925  | -0.422559 |
| Cj0394 | 1 | 0.159887  | -0.203735 | 0.046421  | -0.131155 | 0.029276  | 0.1125    | 0.263756  | -0.013771 | 0.077927  | 0.095317  | 0.148869  |
| Cj0395 | 1 | -1.365128 | -1.673923 | -0.121235 | -0.359194 | 0.138421  | 0.050328  | 0.013784  | 0.1038    | -0.128629 | 0.104739  | -0.534496 |
| Cj0396 | 1 | -0.137013 | 0.000865  | -0.027381 | 0.066537  | 0.018064  | -0.018293 | 0.056306  | 0.205768  | 0.234379  | 0.374845  | -0.219774 |
| Cj0397 | 1 | 0.06571   | -0.217256 | 0.231801  | -0.359194 | 0.303109  | -0.019902 | -0.187379 | 0.016782  | -0.197269 | 0.126312  | 0.112367  |
| Cj0398 | 1 | 0.172359  | 0.072037  | -0.408895 | 0.072312  | -0.757794 | -0.023123 | 0.080385  | -0.627939 | 0.174534  | 0.32239   | 0.045163  |
| Cj0399 | 1 | 0.117562  | 0.064745  | -0.651314 | 0.459222  | -0.695956 | 0.203765  | 0.289536  | -0.923578 | 0.384381  | 0.259664  | -0.498586 |
| Cj0400 | 1 | 0.131326  | 0.040542  | 0.05464   | 0.128293  | 0.191942  | 0.050467  | -0.171044 | 0.314755  | 0.006908  | -0.009844 | 0.012783  |
| Cj0401 | 1 | -0.096345 | 0.005472  | -0.632853 | -0.015374 | -0.749281 | 0.058524  | -0.319406 | -0.646338 | 0.095587  | 0.043764  | -0.027528 |
| Cj0402 | 1 | -0.064465 | 0.022048  | -0.802638 | -0.022244 | -0.901311 | -0.185409 | -0.962407 | -0.866436 | 0.103531  | 0.102725  | -0.103147 |
| Cj0403 | 1 | 0.122209  | -0.000144 | -0.224317 | 0.021053  | -0.739131 | 0.060739  | 0.014498  | -0.148481 | 0.049352  | 0.132643  | 0.148609  |
| Cj0404 | 1 | 0.197865  | -0.02694  | -0.107182 | 0.142871  | -0.084517 | -0.034899 | -0.063108 | 0.279768  | 0.245252  | 0.339822  | -0.097425 |
| Cj0405 | 1 | 0.06984   | -0.507993 | -0.315271 | -0.228875 | -0.235144 | -0.042011 | -0.19479  | -0.398399 | -0.228537 | 0.022474  | 0.090853  |
| Cj0406 | 1 | 0.053389  | 0.003458  | -0.372206 | 0.002306  | -0.695723 | 0.026446  | 0.085153  | -0.234465 | -0.039933 | -0.001877 | 0.10675   |
| Cj0407 | 1 | 0.056722  | 0.031536  | -0.075368 | 0.045862  | -0.243831 | 0.041804  | 0.017637  | -0.126266 | -0.027675 | -0.088347 | 0.014927  |
| Cj0408 | 1 | 0.144307  | -0.01917  | 0.200755  | 0.125519  | 0.099228  | -0.146723 | -0.098815 | 0.235114  | 0.127105  | 0.020769  | 0.034216  |
| Cj0409 | 1 | -0.206895 | -0.134952 | -0.069149 | -0.127683 | -0.221791 | -0.13005  | -0.065672 | -0.081308 | -0.072786 | -0.225329 | -0.090957 |
| Cj0410 | 1 | -0.02239  | -0.003756 | -0.03697  | -0.148961 | 0.092613  | -0.087733 | -0.138124 | 0.136585  | -0.099742 | -0.030767 | -0.128472 |
| Cj0411 | 1 | 0.069702  | 0.041523  | -0.710048 | -0.366615 | -0.744197 | -0.126108 | -0.099433 | -0.248622 | -0.031651 | 0.003458  | -0.391002 |
| Cj0412 | 1 | 0.145351  | 0.260146  | 0.180784  | -0.168123 | 0.334911  | -0.09619  | -0.148641 | 0.40414   | 0.031536  | 0.239276  | -0.30187  |
| Cj0413 | 1 | -0.102992 | -0.000289 | 0.213752  |           | 0.292193  | -1.222633 | -1.1181   | -0.01844  |           | -2.221623 | -0.374636 |
| Cj0414 | 1 | 0.082158  | 0.052972  | -0.940922 | -0.309896 | -1.013917 | -0.046474 | 0.017494  | -1.03771  | 0.088684  | -0.081308 | -0.269164 |
| Cj0415 | 1 | 0.154324  | 0.035624  | -0.185901 | -0.065068 | -0.234126 | -0.017125 | 0.072037  | 0.066261  | 0.056722  | -0.074152 | -0.28279  |
| Cj0416 | 1 | 0.104202  | 0.40806   | 0.242572  | -0.159718 | 0.317999  | -0.523048 | -0.350706 | 0.333996  | -0.105628 | -0.035343 | -0.127053 |
| Cj0417 | 1 | 0.17479   | -0.018878 | -0.533034 | -0.027234 | -0.784632 | -0.10036  | -0.157785 | -1.108114 | 0.158596  | 0.073957  | -0.269164 |
| Cj0418 | 1 | 0.116764  | 0.02772   | -0.711464 | 0.154324  | -1.221623 | -0.243831 | 0.061016  | -0.77769  | 0.302173  | 0.196733  | -0.083294 |

|        |   |           |           |           |           |           |           |           |           |           |           |           |
|--------|---|-----------|-----------|-----------|-----------|-----------|-----------|-----------|-----------|-----------|-----------|-----------|
| Cj0419 | 1 | 0.211137  | 0.031254  | -0.611314 | 0.333195  | -1.308287 | 0.289952  | 0.30229   | -0.619049 | 0.285106  | 0.254836  | 0.03984   |
| Cj0420 | 1 | 0.042084  | 0.359184  | 0.256286  | 0.108759  | 0.366924  | 0.117562  | 0.082566  | 0.423632  | 0.185613  | 0.204266  | 0.100709  |
| Cj0421 | 1 | -0.183441 | -0.233956 | 0.172872  | -0.122491 | 0.127105  | 0.020484  | 0.001154  | 0.016639  | 0.089498  | 0.072723  | -0.001732 |
| Cj0422 | 1 | -0.46037  | -0.688032 | 0.036468  | -0.098969 | 0.04698   | -0.399921 | 0.065021  | 0.022474  | 0.141956  | 0.139862  | 0.047259  |
| Cj0423 | 1 | -1.212568 | -1.26986  | -0.098351 | -0.056041 | -0.175273 | -2.716908 | -0.081308 | 0.112233  | 0.007626  | -0.028263 | 0.257373  |
| Cj0424 | 1 | -1.438698 | -0.182786 | 0.094641  | 0.11023   | 0.27965   | -2.726424 | -0.04707  | 0.370164  | 0.124063  | 0.083111  | -0.021804 |
| Cj0425 | 1 | -0.41677  | -0.057692 | -0.282439 | -0.110293 | -0.691523 | -0.22803  | 0.01078   | -0.537424 | 0.026588  | 0.059217  | -0.002599 |
| Cj0426 | 1 | -0.200084 | -0.073241 | -0.125951 | -0.037562 | -0.251367 | -0.21927  | 0.138028  | -0.072179 | 0.010493  | -0.050353 | 0.230695  |
| Cj0427 | 1 | 0.042364  | -0.017855 | -0.613299 | 0.299714  | -0.801129 | -0.104387 | 0.303225  | -0.97568  | 0.274053  | 0.126973  | -0.56192  |
| Cj0428 | 1 | -0.078716 | 0.23585   | 0.278342  | 0.044324  | 0.422448  | -0.166827 | -0.117318 | 0.467801  | -0.022537 | 0.00906   | 0.336512  |
| Cj0429 | 1 | -0.039488 | 0.207018  | -0.355498 | -0.032536 | -0.698764 | 0.06226   | -0.10827  | -0.178045 | 0.105946  | 0.048655  | 0.017637  |
| Cj0430 | 1 | -0.082377 | 0.410884  | -0.072483 | -0.100051 | 0.006908  | 0.037734  | -0.120765 | 0.064883  | 0.132774  | 0.131985  | 0.228973  |
| Cj0431 | 1 | -0.047666 | 0.193078  | -0.184425 | 0.062398  | 0.025596  | 0.107956  | -0.050353 | 0.112767  | -0.089114 | 0.025029  | 0.446256  |
| Cj0432 | 1 | 0.324235  | 0.295958  | 0.120617  | 0.136979  | 0.309525  | 0.088142  | 0.089769  | 0.324811  | 0.226632  | 0.245009  | 0.606537  |
| Cj0433 | 1 | 0.200504  | -0.047219 | -0.613741 | -0.04216  | -0.835986 | 0.039981  | 0.229834  | -0.874613 | 0.300182  | 0.349479  | 0.158854  |
| Cj0434 | 1 | 0.057277  | -0.02459  | -0.111695 | -0.2624   | -0.313477 | -0.128629 | 0.178747  | -0.203236 | -0.109359 | -0.06356  | 0.136454  |
| Cj0435 | 1 | -0.115441 | 0.059909  | -0.414461 | -0.097579 | -0.319946 | -0.215245 | -0.297254 | -0.21927  | -0.122805 | -0.010716 | 0.096802  |
| Cj0436 | 1 | 0.047957  | 0.132906  | 0.022332  | 0.00317   | 0.390448  | -0.242806 | -0.439285 | 0.198997  | -0.227692 | -0.055142 | 0.172231  |
| Cj0437 | 1 | 0.004322  | -0.162299 | -0.110137 | -0.576691 | -0.278584 | -0.237183 | -0.133685 | -0.376882 | -0.184916 | -0.331518 | 0.20989   |
| Cj0438 | 1 | 0.028286  | 0.043345  | -0.271601 | -0.246738 | -0.197931 | 0.033652  | 0.136323  | -0.161492 | -0.167637 | -0.150721 | 0.194465  |
| Cj0439 | 1 | 0.072037  | -0.044241 | -0.13733  | 0.023894  | 0.057138  | -0.053344 | 0.078337  | -0.005203 | -0.108581 | 0.079566  | 0.101381  |
| Cj0440 | 1 | 0.393746  | 0.241108  | -0.106249 | 0.174279  | 0.128953  | -0.018732 | -0.036674 | 0.282618  | 0.28404   | 0.359071  | 0.095317  |
| Cj0441 | 1 | 0.174406  | -0.129576 | -0.202572 | -0.309181 | 0.040822  | -0.046474 | -0.012315 | 0.00777   | 0.01035   | 0.005184  | 0.268315  |
| Cj0442 | 1 | 0.027862  | -0.049457 | -0.283141 | 0.013069  | -0.905629 | -0.084823 | 0.278936  | -0.907522 | 0.095452  | 0.015926  | -0.217088 |
| Cj0443 | 1 | 0.004753  | 0.018492  | -0.060397 | 0.029135  | -0.010861 | -0.037858 | -0.093263 | 0.071076  | -0.139554 | -0.037858 | 0.182819  |
| Cj0444 | 1 | -0.000866 | 0.370945  | 0.057831  | 0.20389   | -0.012606 | -0.131629 | -0.380258 | 0.12499   | -0.023563 | -0.053793 | 0.14991   |
| Cj0445 | 1 | 0.030548  | -0.038154 | -0.222465 | -0.196773 | -0.34795  | 0.03083   | -0.434403 | -0.190174 | -0.024883 | -0.100979 | 0.112367  |
| Cj0446 | 1 | -0.02841  | 0.05464   | -0.255494 | -0.005638 | -0.604718 | -0.287712 | -0.314374 | -0.330066 | -0.023123 | -0.09234  | 0.085425  |
| Cj0447 | 1 | 0.143524  | -0.105473 | 0.110631  | -0.060247 | 0.221073  | -0.02415  | 0.034779  | 0.148999  | -0.277184 | -0.156338 | 0.073272  |
| Cj0448 | 1 | 0.094371  | 0.004178  | -0.219774 | 0.210638  | -0.127683 | 0.071351  | -0.063108 | 0.114234  | 0.163628  | 0.166073  | 0.055612  |
| Cj0449 | 1 | 0.123136  | -0.014208 | -0.407555 | -0.038599 | -0.27282  | 0.159112  | -0.02034  | -0.062053 | 0.143263  | 0.145743  | 0.148479  |
| Cj0450 | 1 | 0.146003  | 0.01078   | -0.497568 | -0.07552  | -0.748554 | -0.021658 | 0.145351  | -0.437916 | 0.04712   | 0.090853  | 0.141694  |
| Cj0451 | 1 | 0.105946  | 0.046282  | -0.275088 | 0.090853  | -0.496957 | -0.03416  | 0.215119  | -0.185901 | 0.160017  | 0.081885  | 0.139077  |
| Cj0452 | 1 | 0.001298  | -0.071421 | 0.10916   | -0.114816 | 0.076149  | -0.070209 | -0.091879 | 0.33182   | -0.057091 | -0.064163 | -0.181149 |
| Cj0453 | 1 | -0.116066 | -0.045134 | -0.644307 | -0.477944 | -0.388922 | -0.08253  | -0.083294 | -0.321928 | -0.165531 | -0.147202 | -0.197269 |

|        |   |           |           |           |           |           |           |           |           |           |           |           |
|--------|---|-----------|-----------|-----------|-----------|-----------|-----------|-----------|-----------|-----------|-----------|-----------|
| Cj0454 | 1 | 0.051442  | 0.025029  | -0.670475 | -0.129734 | -0.94675  | -0.064767 | 0.069427  | -0.42082  | 0.12618   | 0.094371  | -0.048114 |
| Cj0455 | 1 | 0.201132  | 0.054362  | -0.242635 | 0.073135  | -0.169582 | -0.028999 | -0.06115  | -0.018293 | 0.070801  | 0.206643  | -0.032684 |
| Cj0456 | 1 | 0.242206  | -0.025324 | -0.315092 | 0.273098  | -0.166503 | 0.095722  | 0.021622  | 0.24732   | 0.266637  | 0.230572  | -0.14003  |
| Cj0457 | 1 | 0.037031  | -0.010134 | 0.156138  | -0.081461 | 0.194717  | 0.096127  | -0.228199 | 0.062674  | -0.164884 | -0.06115  | -0.013189 |
| Cj0458 | 1 | 0.18574   | -0.103147 | -0.253085 | -0.017271 | -0.066276 | -0.049606 | 0.0782    | -0.042011 | -0.003467 | -0.016541 | 0.109026  |
| Cj0459 | 1 | 0.237808  | 0.024745  | -0.526577 | 0.279055  | -1.007812 | 0.310805  | 0.240498  | -0.53931  | 0.262433  | 0.207768  | -0.040378 |
| Cj0460 | 1 | 0.172872  | 0.031819  | 0.075738  | 0.370276  | -0.084211 | 0.35727   | 0.235972  | 0.135666  | 0.415218  | 0.211261  | -0.18295  |
| Cj0461 | 1 | -0.058593 | 0.046142  | -0.585107 | 0.23131   | -1.207228 | 0.146786  | 0.193709  | -0.839596 | 0.346531  | 0.178109  | -0.293182 |
| Cj0462 | 1 | -0.204732 | 0.038858  | -0.543299 | -0.110604 | -0.811726 | -0.019902 | 0.087599  | -0.718806 | -0.034751 | -0.089728 | -0.344099 |
| Cj0463 | 1 | -0.007087 | 0.041243  | -0.512719 | 0.016639  | -0.828281 | -0.08253  | 0.1995    | -0.711228 | 0.1503    | 0.164529  | -0.171856 |
| Cj0464 | 1 | 0.028711  | 0.005616  | 0.008057  | 0.388796  | -0.169258 | -0.053643 | 0.361656  | 0.062122  | 0.35558   | 0.220578  | -0.270382 |
| Cj0465 | 1 | 0.032665  | -0.427983 | 0.025879  | -0.190668 | -0.281912 | 0.034497  | -0.202572 | 0.030265  | -0.127053 | 0.060739  | -0.060999 |
| Cj0466 | 1 | 0.06984   | 0.050606  | 0.032524  | -0.100979 | -0.176577 | 0.092749  | 0.239154  | -0.10827  | 0.02361   | 0.033652  | 0.025879  |
| Cj0467 | 1 | 0.166844  | 0.046561  | -0.304541 | 0.184344  | -0.782397 | 0.14104   | 0.065986  | -0.53366  | 0.15056   | 0.27011   | 0.140386  |
| Cj0468 | 1 | 0.127105  | 0.063227  | 0.278698  | 0.122606  | 0.373286  | 0.06929   | -0.07127  | 0.234747  | 0.070389  | 0.080248  | 0.026588  |
| Cj0469 | 1 | -0.067183 | 0.021195  | -0.322265 | 0.028993  | -0.80138  | 0.192699  | -0.014791 | -0.773245 | 0.117695  | 0.115433  | -0.111072 |
| Cj0470 | 1 | -0.124692 | -0.086354 | -0.101598 | 0.153805  | -0.267948 | 0.098824  | 0.233152  | -0.134635 | 0.212134  | -0.009263 | 0.141564  |
| Cj0471 | 1 | 0.194591  | 0.017922  | -0.43012  | 0.532267  | -0.706041 | 0.279887  | 0.482229  | -0.703454 | 0.413161  | 0.244035  | -0.574756 |
| Cj0472 | 1 | -0.156177 | 0.399116  | 0.40969   | 0.187894  | 0.302524  | -0.046325 | -0.096962 | 0.40523   | 0.10165   | -0.018147 | 0.295253  |
| Cj0473 | 1 | 0.024462  | 0.114367  | -0.178208 | 0.130536  | -0.268643 | 0.245374  | 0.073409  | -0.359934 | 0.123799  | 0.008057  | 0.063917  |
| Cj0474 | 1 | -0.024737 | 0.067226  | -0.494516 | 0.113034  | -0.847103 | 0.137372  | 0.196103  | -0.465739 | 0.108892  | 0.031113  | 0.275484  |
| Cj0475 | 1 | 0.157044  | 0.034216  | -0.211565 | 0.116232  | -0.056491 | 0.09004   | 0.071625  | 0.1125    | -0.011297 | 0.009204  | 0.396269  |
| Cj0476 | 1 | 0.06695   | -0.010861 | -0.384772 | 0.218471  | -0.401254 | 0.089769  | 0.092884  | -0.540988 | 0.227618  | 0.161178  | 0.05797   |
| Cj0477 | 1 | -0.189351 | 0.000865  | -0.554909 | -0.044985 | -1.190009 | -0.091725 | -0.12422  | -1.185409 | 0.070389  | 0.088956  | -0.12658  |
| Cj0478 | 1 | -0.102837 | 0.055612  | -0.200415 | 0.009347  | -0.303294 | 0.03196   | 0.151989  | -0.178535 | 0.098958  | 0.123401  | 0.167872  |
| Cj0479 | 1 | 0.011496  | 0.039981  | -0.08024  | 0.050745  | -0.070815 | -0.006217 | 0.215741  | -0.128472 | -0.013625 | 0.013355  | -0.081156 |
| Cj0480 | 1 | -1.8847   | -1.11904  | 0.222186  | 0.087734  | 0.393965  | -3.412731 | -0.079021 | 0.354226  | 0.156785  | 0.083247  | -0.010134 |
| Cj0481 | 1 | -2.870915 | -1.949533 | -0.375946 | -0.317786 | -0.604937 | -3.627716 | 0.019346  | -0.529697 | 0.089769  | 0.001874  | -0.070815 |
| Cj0482 | 1 | -2.84996  | -0.830588 | -0.589225 | 0.009347  | -0.918388 | -3.414268 | 0.210514  | -0.971148 | 0.080658  | 0.037453  | -0.303828 |
| Cj0483 | 1 | -3.899695 | -0.620601 | -0.65449  | 0.417704  | -0.89084  | -5.608232 | 0.488926  | -1.527824 | 0.19131   | 0.081885  | -0.715012 |
| Cj0484 | 1 | -3.836501 | -1.96917  | -0.460767 | 0.288654  | -0.644082 | -7.20025  | 0.051859  | -0.551099 | 0.258338  | 0.212756  | -0.064616 |
| Cj0485 | 1 | -3.698998 | -2.848921 | -0.110293 | -0.408512 | -0.174784 | -6.20025  | -0.067183 | -0.157625 | -0.039192 | -0.064012 | 0.061707  |
| Cj0486 | 1 | -4.013917 | -2.68687  | -0.182131 | -0.294066 | -0.215747 | -7.310432 | -0.232769 | -0.141939 | -0.221623 | -0.182786 | -0.021658 |
| Cj0487 | 1 | -2.490862 | -1.205896 | -0.459576 | -0.029588 | -0.592267 | -3.120294 | -0.347766 | -0.438503 | 0.017922  | 0.038858  | -0.048711 |
| Cj0488 | 1 | -1.064012 | -2.049905 | 0.099632  | -0.194625 | 0.190299  | -2.317606 | -0.409661 | 0.259785  | 0.070939  | -0.02459  | -0.054392 |

|        |      |   |           |           |           |           |           |           |           |           |           |           |           |
|--------|------|---|-----------|-----------|-----------|-----------|-----------|-----------|-----------|-----------|-----------|-----------|-----------|
| Cj0489 | ald' | 1 | -3.307573 | -2.703689 | -0.071421 | -0.824955 | -0.271078 | -5.316169 | -0.661091 | -0.101134 | -0.443203 | -0.378757 | 0.109561  |
| Cj0490 | ald' | 1 | -2.626825 | -2.187707 | 0.075601  | -0.378194 | -0.04023  | -3.785875 | -0.36086  | -0.040675 | -0.334971 | -0.272123 | 0.210139  |
| Cj0491 | rpsL | 1 | -0.300271 | -0.239907 | -0.022537 | 0.148479  | -0.113099 | -0.227692 | -0.115129 | 0.061292  | -0.179515 | -0.035195 | 0.29678   |
| Cj0492 | rpsG | 1 | -0.192975 | 0.127501  | -0.003611 | 0.107152  | -0.053793 | -0.174459 | -0.370527 | 0.202637  | -0.139871 | -0.223643 | -0.028558 |
| Cj0493 | fusA | 1 | 0.011209  | -0.054093 | -0.514161 | 0.096667  | -0.592919 | 0.107152  | 0.157949  | -0.474132 | 0.244644  | 0.101516  | -0.358824 |
| Cj0494 |      | 1 | -0.062656 | 0.037874  | -0.726186 | -0.025324 | -1.03771  | 0.16092   | 0.144699  | -1.059194 | 0.043345  | -0.013917 | -0.245369 |
| Cj0495 |      | 1 | -0.006072 | -0.378007 | 0.2587    | 0.441271  | 0.441271  | -0.273343 | 0.249142  | -1.663374 | -1.147202 | 0.161694  |           |
| Cj0496 |      | 1 | 0.090176  | 0.00389   | -0.39138  | 0.146395  | -0.386846 | 0.218967  | 0.118626  | -0.164399 | 0.259062  | 0.158466  | -0.245198 |
| Cj0497 |      | 1 | 0.045163  | -0.009699 | -0.748069 | 0.205267  | -0.853605 | -0.071573 | 0.357158  | -0.847622 | 0.308361  | 0.319849  | -0.236843 |
| Cj0498 | trpC | 1 | 0.023468  | 0.028569  | -0.521805 | -0.098815 | -0.865122 | -0.690824 | 0.043484  | -0.609552 | 0.004897  | -0.025764 | -0.328616 |
| Cj0499 |      | 1 | -0.139713 | -0.236164 | 0.15095   | -0.109359 | 0.028993  | -0.757306 | -0.025618 | 0.214     | -0.197931 | -0.283316 | -0.019755 |
| Cj0500 |      | 1 | -0.010716 | 0.048097  | -0.450873 | 0.381173  | -0.597278 | -0.485398 | 0.227741  | -0.452254 | 0.282025  | 0.272859  | -0.219102 |
| Cj0501 |      | 1 | -2.175273 | -1.913216 | -0.570893 | -0.542668 | -0.296722 | -0.358824 | -0.446541 | -0.215915 | -0.211398 | -0.89084  | -0.398589 |
| Cj0502 |      | 1 | -0.53575  | 0.037734  | -0.664974 | 0.145221  | -0.796862 | 0.024745  | 0.277033  | -0.888434 | 0.358284  | 0.051024  | -0.564691 |
| Cj0503 |      | 1 | 0.005472  | -0.092278 | -0.041863 | 0.159629  | -0.368663 | 0.122474  | 0.148869  | -0.142576 | 0.025312  | 0.011353  | 0.120617  |
| Cj0504 |      | 1 | 0.058801  | 0.018777  | -0.307216 | 0.196859  | -0.322289 | 0.135141  | -0.023856 | -0.180986 | 0.220206  | 0.095857  | -0.160847 |
| Cj0505 |      | 1 | -0.302938 | 0.004753  | -0.196608 | -0.035934 | -0.254117 | -0.042754 | 0.079429  | -0.235144 | 0.127237  | -0.100051 | -0.176577 |
| Cj0506 | alaS | 1 | -0.081308 | 0.05894   | -0.562346 | -0.108736 | -0.635988 | 0.129217  | 0.054501  | -0.621266 | -0.072028 | -0.239736 | -0.347215 |
| Cj0507 | maf  | 1 | 0.0297    | -0.102372 | 0.078746  | -0.049905 | -0.035934 | 0.170951  | 0.138683  | 0.179766  | -0.025911 | -0.020633 | 0.016211  |
| Cj0508 | pbpA | 1 | 0.01407   | -0.003322 | 0.264596  | 0.225028  | 0.375623  | 0.251325  | 0.091531  | 0.348346  | 0.113434  | 0.140517  | -0.038154 |
| Cj0509 |      | 1 | -0.161331 | -0.038747 | -0.081614 | -0.207894 | -0.165531 | 0.06571   | -0.164399 | -0.115441 | 0.001154  | -0.032241 | -0.241782 |
| Cj0510 |      | 1 | 0.016354  | 0.07902   | -0.776207 | 0.061569  | -0.845287 | 0.052416  | -0.000722 | -0.506968 | 0.120219  | 0.129349  | -0.039044 |
| Cj0511 |      | 1 | 0.029418  | 0.00619   | 0.034357  | 0.151469  | -0.0613   | 0.223299  | 0.054223  | 0.157432  | 0.093425  | 0.112367  | 0.038717  |
| Cj0512 | purC | 1 | 0.026729  | 0.153805  | 0.133564  | 0.058109  | 0.22132   | -0.184752 | 0.034779  | 0.322274  | 0.160017  | 0.148218  | -0.048561 |
| Cj0513 |      | 1 | -0.086507 | -0.324455 | -0.004479 | -0.470129 | -0.02503  | -0.197104 | -0.239396 | -0.020048 | -0.265345 | -0.031209 | -0.169745 |
| Cj0514 | purQ | 1 | 0.005184  | -0.009263 | -0.300981 | -0.015666 | -0.307216 | 0.102591  | 0.137897  | -0.155213 | 0.098554  | 0.040121  | -0.207394 |
| Cj0515 |      | 1 | 0.090176  | -0.032979 | 0.169284  | 0.018207  | 0.330903  | 0.050328  | -0.013043 | 0.197362  | 0.025312  | 0.051998  | -0.040378 |
| Cj0516 | plsC | 1 | -0.221455 | 0.219463  | 0.195348  | 0.193204  | 0.355355  | -0.015958 | 0.048794  | 0.280244  | -0.007087 | 0.081476  | -0.059946 |
| Cj0517 | crcB | 1 | 0.009204  | 0.017922  | -0.460965 | 0.056029  | -0.826489 | 0.315798  | 0.142609  | -0.729053 | 0.279531  | 0.282499  | -0.147042 |
| Cj0518 | htpG | 1 | -0.142736 | 0.055751  | 0.028145  | 0.057138  | 0.091531  | 0.079293  | 0.269751  | 0.020627  | 0.021906  | 0.123401  | -0.098351 |
| Cj0519 |      | 1 | 0.080521  | 0.152119  | -0.004624 | -0.04216  | 0.089905  | -0.025618 | -0.055142 | 0.20201   | -0.084211 | -0.01844  | 0.106348  |
| Cj0520 |      | 1 | 0.125254  | 0.191942  | 0.211137  | 0.051581  | 0.53446   | -0.041417 | -0.004479 | 0.422341  | 0.016496  | -0.018001 | 0.134089  |
| Cj0521 |      | 1 | 0.006908  | 0.221073  | -0.302404 | -0.188365 | -0.422946 | 0.134615  | 0.019631  | -0.29885  | 0.09004   | 0.044464  | -0.121863 |
| Cj0522 |      | 1 | -0.099742 | 0.09842   | -0.221455 | -0.107959 | -0.188858 | -0.033865 | 0.128821  | -0.026499 | -0.022537 | -0.031651 | 0.162597  |
| Cj0523 |      | 1 | 0.074094  | 0.000433  | -0.203402 | -0.010716 | -0.01552  | -0.020194 | 0.110631  | 0.088413  | 0.053111  | 0.118626  | 0.153805  |

|        |   |           |           |           |           |           |           |           |           |           |           |           |
|--------|---|-----------|-----------|-----------|-----------|-----------|-----------|-----------|-----------|-----------|-----------|-----------|
| Cj0524 | 1 | 0.167229  | 0.484808  | 0.268315  | -0.056041 | 0.668482  | 0.104068  | -0.004624 | 0.44297   | 0.15004   | 0.12618   | 0.344147  |
| Cj0525 | 1 | -0.070663 | 0.023326  | -0.227523 | 0.032242  | -0.497568 | 0.228849  | -0.015228 | -0.139871 | 0.033229  | 0.023752  | -0.08804  |
| Cj0526 | 1 | -0.150241 | -0.045729 | 0.016211  | -0.049308 | 0.208392  | 0.0782    | 0.031254  | 0.076696  | 0.01078   | 0.044604  | -0.031356 |
| Cj0527 | 1 | 0.015355  | 0.042644  | -0.251024 | 0.087734  | -0.202572 | 0.095992  | 0.065159  | -0.009699 | 0.153935  | 0.088684  | -0.111383 |
| Cj0528 | 1 | 0.041944  | 0.557189  | 0.338795  | -0.028999 | 0.534161  | -0.188858 | -0.174133 | 0.500802  | 0.286408  | 0.14978   | -0.304541 |
| Cj0529 | 1 | 0.115832  | -0.048114 | -0.218934 | 0.015212  | -0.321567 | 0.098554  | 0.10916   | -0.318326 | 0.287354  | 0.242572  | 0.040682  |
| Cj0530 | 1 | 0.000433  | -0.007522 | -0.22095  | -0.108892 | -0.131945 | -0.177066 | 0.032806  | -0.081461 | -0.115285 | -0.009699 | 0.229957  |
| Cj0531 | 1 | -0.193965 | -0.024737 | -0.172181 | -0.144808 | 0.082294  | -0.117944 | -0.147362 | 0.061707  | -0.217424 | -0.085282 | 0.020342  |
| Cj0532 | 1 | 0.1149    | -0.013625 | -0.236333 | 0.15782   | -0.345015 | 0.043624  | -0.096345 | -0.070058 | 0.042084  | -0.039785 | -0.171693 |
| Cj0533 | 1 | -0.088807 | -0.043943 | -0.165531 | -0.137013 | -0.412347 | 0.00619   | 0.168     | -0.624822 | 0.10742   | 0.066675  | -0.345198 |
| Cj0534 | 1 | -0.112631 | -0.011879 | -0.356421 | -0.208561 | -0.597278 | -0.034013 | 0.000721  | -0.437721 | -0.188858 | -0.261016 | -0.068544 |
| Cj0535 | 1 | -0.173645 | -0.061752 | -0.174459 | -0.055591 | -0.196277 | 0.007339  | -0.016103 | -0.167799 | -0.30276  | -0.221119 | 0.003026  |
| Cj0536 | 1 | -0.187871 | 0.011353  | -0.591397 | -0.017563 | -0.303294 | 0.115965  | 0.002595  | -0.222296 | 0.059355  | 0.023752  | -0.479351 |
| Cj0537 | 1 | -0.128156 | -0.151042 | -0.589876 | -0.698295 | -0.742265 | -0.084058 | -0.234635 | -0.56043  | -0.204732 | -0.248965 | -0.109514 |
| Cj0538 | 1 | -0.059495 | -0.004045 | -0.140507 | -0.260152 | -0.353837 | -0.034013 | 0.108089  | -0.252226 | -0.001155 | -0.079021 | -0.208228 |
| Cj0539 | 1 | -0.027528 | -0.029735 | 0.038015  | -0.03003  | -0.127999 | -0.003322 | -0.087427 | 0.081476  | -0.204233 | 0.032383  | 0.114234  |
| Cj0540 | 1 | 0.072312  | 0.374733  | 0.120086  | 0.204892  | 0.099228  | 0.030689  | -0.341172 | 0.163628  | -0.053943 | 0.068877  | 0.089227  |
| Cj0541 | 1 | -0.051848 | -0.030767 | -0.626825 | -0.176577 | -0.984502 | 0.042084  | -0.090035 | -0.571107 | 0.019204  | 0.028428  | -0.434598 |
| Cj0542 | 1 | -0.066276 | 0.023042  | -0.689893 | -0.171856 | -1.14401  | -0.056941 | -0.057992 | -1.111851 | -0.091418 | -0.033865 | -0.317606 |
| Cj0543 | 1 | -0.032389 | 0.034216  | -0.014645 | -0.318146 | -0.16942  | -0.181149 | -0.148481 | -0.104697 | -0.321567 | -0.151042 | -0.124849 |
| Cj0544 | 1 | 0.090989  | 0.010923  | -0.216921 | 0.165815  | -0.19281  | 0.227618  | 0.170822  | -0.009408 | 0.157044  | 0.164786  | -0.441047 |
| Cj0545 | 1 | -0.032979 | -0.234465 | -0.003756 | -0.480357 | 0.212134  | -0.181313 | -0.198427 | 0.023894  | -0.478346 | -0.210563 | -0.052596 |
| Cj0546 | 1 | 0.130799  | -0.064012 | 0.069977  | -0.226004 | -0.015228 | -0.063861 | -0.120765 | -0.034604 | -0.150241 | -0.062957 | 0.015355  |
| Cj0547 | 1 | 0.005616  | -0.020779 | -0.366057 | -0.003177 | -0.510457 | 0.08093   | 0.144699  | -0.392516 | -0.060999 | -0.112007 | -0.148961 |
| Cj0548 | 1 | -0.07963  | 0.032947  | 0.185867  | 0.00863   | -0.043795 | -0.043943 | -0.124534 | 0.404903  | -0.011443 | 0.018349  | -0.349052 |
| Cj0549 | 1 | 0.03956   | -0.372206 | -0.146084 | -0.304541 | 0.063641  | -0.019609 | -0.181149 | 0.025029  | -0.301693 | 0.023468  | 0.080385  |
| Cj0550 | 1 | -0.1181   | -0.033717 | 0.214249  | -0.326986 | 0.085833  | -0.099124 | 0.053806  | 0.029559  | -0.266559 | -0.077954 | 0.063089  |
| Cj0551 | 1 | 0.152508  | 0.032947  | 0.130931  | 0.107554  | 0.152119  | -0.000577 | 0.188021  | 0.162855  | -0.138124 | -0.027087 | 0.235605  |
| Cj0552 | 1 | 0.202637  | 0.05894   | 0.231924  | 0.017352  | 0.283092  | -0.086661 | -0.123277 | 0.411426  | -0.11951  | -0.053194 | -0.025324 |
| Cj0553 | 1 | -0.089421 | 0.00245   | -0.544561 | 0.280125  | -0.913216 | 0.147307  | 0.145221  | -0.816545 | 0.304628  | 0.134747  | -0.341537 |
| Cj0554 | 1 | -0.038451 | 0.037312  | -0.21927  | -0.118884 | -0.005638 | 0.028993  | -0.04439  | -0.009844 | -0.094341 | 0.026446  | -0.098351 |
| Cj0555 | 1 | 0.119954  | 0.023184  | -0.431871 | -0.069452 | -0.788614 | -0.04558  | -0.088347 | -0.375946 | -0.012461 | -0.000866 | -0.225329 |
| Cj0556 | 1 | 0.056167  | 0.210015  | 0.277866  | 0.144699  | 0.339708  | -0.050652 | -0.039785 | 0.329296  | 0.149389  | 0.115033  | -0.137648 |
| Cj0557 | 1 | -0.002166 | 0.030972  | -0.121549 | 0.079429  | -0.334971 | 0.146655  | -0.202572 | -0.14401  | 0.227371  | 0.037171  | -0.296899 |
| Cj0558 | 1 | 0.004178  | -0.001155 | -0.019024 | -0.056791 | -0.11591  | -0.057392 | -0.020048 | 0.005903  | -0.038154 | -0.122491 | 0.070115  |



|        |   |           |           |           |           |           |           |           |           |           |           |           |
|--------|---|-----------|-----------|-----------|-----------|-----------|-----------|-----------|-----------|-----------|-----------|-----------|
| Cj0559 | 1 | 0.051024  | 0.044464  | -0.249308 | -0.007812 | -0.38289  | 0.054501  | 0.129745  | -0.208394 | -0.020048 | -0.023416 | -0.060397 |
| Cj0560 | 1 | -0.047219 | 0.210638  | 0.216113  | -0.09619  | 0.354001  | -0.048711 | -0.09111  | 0.309409  | 0.088413  | 0.060462  | -0.313836 |
| Cj0561 | 1 | -0.123434 | -0.142417 | 0.104605  | -0.105008 | -0.009699 | 0.147176  | -0.14178  | 0.036749  | 0.073135  | 0.028993  | -0.160363 |
| Cj0562 | 1 | -0.056641 | 0.037031  | -0.253601 | -0.217927 | -0.62371  | -0.025618 | 0.108892  | -0.157303 | -0.076432 | 0.002162  | -0.182131 |
| Cj0563 | 1 | 0.047399  | -0.020194 | 0.078473  | 0.083247  | 0.042644  | 0.028145  | 0.195096  | 0.289362  | 0.165558  | 0.058109  | -0.051549 |
| Cj0564 | 1 | -1.043646 | -0.079935 | 0.32987   | -0.001732 | 0.671927  | -1.001155 | -0.214742 | 0.322966  | -0.016687 | 0.00906   | -0.055891 |
| Cj0565 | 1 | -1.842698 | -0.714539 | -0.068241 | 0.053667  | -0.302048 | -1.879383 | -0.059645 | -0.192315 | 0.210638  | 0.058247  | -0.065521 |
| Cj0566 | 1 | -2.15457  | -1.966912 | 0.08243   | 0.144699  | -0.382325 | -3.988504 | 0.238542  | 0.006621  | 0.226015  | 0.316146  | 0.15069   |
| Cj0567 | 1 | -1.936221 | -1.520769 | 0.127369  | 0.082839  | 0.110096  | -3.099124 | 0.197111  | 0.195096  | 0.08243   | 0.138814  | 0.222681  |
| Cj0568 | 1 | -2.08804  | -1.877791 | 0.140386  | 0.185232  | 0.182946  | -3.270904 | 0.228111  | 0.395721  | 0.147307  | 0.104739  | 0.298424  |
| Cj0569 | 1 | -1.565759 | -1.048711 | -0.038451 | 0.007913  | 0.105544  | -2.267427 | 0.138159  | 0.021338  | 0.045443  | 0.053945  | 0.07286   |
| Cj0570 | 1 | 0.019346  | 0.550408  | 0.061984  | -2.910502 | 0.313594  | -0.087427 | -0.357345 | 0.152897  | -0.785378 | -0.147042 | 0.420078  |
| Cj0571 | 1 | 0.143916  | 0.008917  | -0.042457 | 0.192699  | 0.017922  | 0.22231   | 0.129745  | 0.206018  | 0.096802  | 0.016496  | 0.152768  |
| Cj0572 | 1 | 0.043904  | 0.043064  | 0.044184  | 0.153157  | 0.057277  | 0.142479  | 0.099228  | 0.320889  | 0.080521  | 0.106348  | 0.351741  |
| Cj0573 | 1 | -0.140507 | -0.02327  | -0.233278 | -0.230567 | -0.303116 | -0.018586 | -0.067032 | -0.386468 | -0.246909 | -0.131471 | -0.145286 |
| Cj0574 | 1 | -0.28279  | -0.242465 | 0.10017   | -0.212233 | 0.211511  | -0.111695 | -0.133685 | 0.064883  | -0.213404 | -0.150241 | 0.173767  |
| Cj0575 | 1 | 0.109026  | 0.076422  | 0.090311  | 0.012068  | 0.198997  | 0.076149  | 0.046701  | 0.205518  | -0.00419  | -0.040675 | 0.1333    |
| Cj0576 | 1 | 0.153676  | 0.200253  | 0.269632  | 0.063917  | 0.218719  | -0.04216  | -0.019902 | 0.358171  | -0.04886  | -0.098969 | 0.13606   |
| Cj0577 | 1 | -0.095882 | -0.407364 | 0.159371  | -0.919206 | 0.474981  | -0.159396 | -0.045134 | -0.058443 | -0.116066 | -0.185409 | 0.385265  |
| Cj0578 | 1 | 0.189287  | -0.052745 | 0.063365  | -0.183769 | 0.165687  | -0.005782 | 0.054362  | -0.024296 | -0.040378 | 0.069152  | 0.382501  |
| Cj0579 | 1 | 0.179893  | 0.01407   | 0.143132  | 0.091124  | 0.226632  | 0.238053  | -0.019463 | 0.108223  | 0.021906  | 0.239031  | 0.160146  |
| Cj0580 | 1 | 0.094912  | 0.289126  | 0.159112  | 0.064193  | 0.379288  | -0.020194 | -0.279109 | 0.17645   | -0.179351 | 0.030689  | 0.080658  |
| Cj0581 | 1 | 0.194087  | -0.340623 | 0.212756  | -1.070967 | 0.154194  | -0.832899 | -0.770289 | 0.009347  | -0.70557  | -0.93071  | 0.389016  |
| Cj0582 | 1 | -0.005203 | 0.036749  | -0.735524 | -0.311148 | -0.636436 | -0.286832 | -0.199587 | -0.293182 | -0.281386 | -0.245882 | 0.26123   |
| Cj0583 | 1 | 0.137766  | 0.025171  | -0.318506 | 0.058801  | -0.180495 | -0.069452 | 0.059078  | -0.050801 | -0.02239  | 0.142087  | 0.094506  |
| Cj0584 | 1 | -0.024883 | 0.53655   | 0.305912  |           | 0.518636  | 0.795684  | 0.28948   | 0.40806   | 0.934705  | 3.445462  | 0.212134  |
| Cj0585 | 1 | -0.077802 | -0.292475 | -0.343    | -0.627048 | 0.029842  | -0.320666 | -0.116536 | -0.338798 | -0.294951 | -0.286832 | 0.187008  |
| Cj0586 | 1 | -0.196277 | -0.01552  | -0.307394 | -0.33971  | -0.542879 | -0.236333 | 0.099497  | -0.544771 | -0.353653 | -0.114504 | -0.304541 |
| Cj0587 | 1 | 0.119024  | -0.001877 | -0.45799  | -0.024883 | -0.283492 | -0.091879 | -0.00101  | -0.283141 | -0.016249 | 0.316725  | -0.074912 |
| Cj0588 | 1 | 0.176067  | 0.326767  | 0.337768  | -0.21491  | 0.103665  | -0.09234  | -0.419083 | 0.092613  | -0.050951 | 0.210888  | -0.39498  |
| Cj0589 | 1 | 0.046282  | -0.032094 | -0.121706 | -0.590528 | -0.021072 | -0.508198 | -0.640029 | 0.019061  | -0.303294 | -0.224823 | 0.085968  |
| Cj0590 | 1 | 0.004753  | -0.06115  | 0.208892  | 0.961401  | 0.492007  | 1.749491  | 1.108089  | 0.033934  | 1.456964  | 0.342213  | 0.260748  |
| Cj0591 | 1 | -0.240418 | -0.232769 | 0.258338  |           | -0.046474 |           | -0.810966 | 0.252779  |           | -0.186393 | 0.646255  |
| Cj0592 | 1 | 0.127633  | 0.194465  | 0.297015  | 1.877037  | 0.545968  |           | -0.923578 | 0.351628  | 0.149129  | -0.429926 | -0.021658 |
| Cj0593 | 1 | -0.025324 | 0.035624  | -0.296899 | -0.089267 | -0.226848 | 0.123004  | -0.04707  | -0.165208 | 0.023894  | 0.127369  | 0.133037  |

dnaB

ribA

lysC

folP

ligA

tlyA

ribF

|        |   |           |           |           |           |           |           |           |           |           |           |           |
|--------|---|-----------|-----------|-----------|-----------|-----------|-----------|-----------|-----------|-----------|-----------|-----------|
| Cj0594 | 1 | -0.084058 | -0.010134 | -0.615729 | 0.003746  | -0.816291 | 0.007052  | 0.188401  | -0.76783  | 0.071076  | 0.108892  | -0.198096 |
| Cj0595 | 1 | -0.091571 | -0.252226 | 0.27274   | 0.091666  | 0.514501  | 0.074094  | 0.002018  | 0.285698  | -0.11904  | 0.130536  | 0.084745  |
| Cj0596 | 1 | 0.011925  | -0.009844 | -0.096962 | 0.137897  | -0.315092 | 0.115965  | -0.090649 | 0.14496   | 0.074505  | 0.046142  | -0.140985 |
| Cj0597 | 1 | -0.005348 | -0.501034 | 0.153935  | -2.337886 | 0.184471  | -0.277359 | -0.165046 | -0.008392 | -0.427401 | -0.500218 | 0.111966  |
| Cj0598 | 1 | 0.19774   | 0.0397    | -0.658356 | -0.032979 | -0.990509 | -0.019902 | 0.1995    | -0.911858 | 0.009204  | 0.255078  | -0.332426 |
| Cj0599 | 1 | 0.14274   | 0.067363  | -0.433039 | 0.041383  | -0.458981 | 0.044324  | 0.135009  | -0.558729 | 0.02432   | 0.148869  | -0.214408 |
| Cj0600 | 1 | 0.161565  | 0.011782  | -0.03416  | 0.260026  | 0.101919  | 0.114234  | 0.126444  | 0.362891  | 0.193835  | 0.129613  | -0.271078 |
| Cj0601 | 1 | 0.047678  | 0.054918  | -0.484792 | 0.101516  | -0.727141 | 0.29772   | 0.176195  | -0.560856 | 0.277747  | 0.27011   | -0.148161 |
| Cj0602 | 1 | -0.020633 | 0.007196  | -0.661547 | -0.234126 | -0.860923 | 0.114367  | 0.039279  | -0.419855 | 0.025879  | -0.02694  | -0.24366  |
| Cj0603 | 1 | 0.068602  | 0.389347  | 0.392977  | 1.452595  | 0.516721  |           | 1.4067    | 0.267835  |           | -0.233108 | 0.459432  |
| Cj0604 | 1 | 0.187134  | 0.028286  | 0.079566  | 0.169412  | -0.180332 | 0.205893  | 0.085289  | -0.127053 | 0.238298  | 0.122871  | -0.074001 |
| Cj0605 | 1 | -0.239396 | -0.003033 | -0.111695 | -0.381949 | -0.147362 | -0.064616 | -0.495736 | -0.192975 | -0.422366 | -0.299028 | -0.197269 |
| Cj0606 | 1 | 0.237931  | -0.032684 | -0.962407 | 0.426426  | -1.175599 | 0.302056  | 0.477056  | -1.577336 | 0.388796  | 0.395282  | -0.585107 |
| Cj0607 | 1 | -0.069755 | 0.004753  | -0.654449 | 0.094912  | -1.055291 | 0.046282  | 0.094506  | -0.943139 | 0.164658  | 0.107018  | -0.094803 |
| Cj0608 | 1 | -0.029441 | 0.02219   | 0.120883  | 0.123931  | 0.232538  | 0.105276  | 0.079702  | 0.252416  | 0.089363  | 0.015498  | -0.132736 |
| Cj0609 | 1 | -0.036674 | 0.041664  | -0.560217 | -0.184916 | -1.250852 | 0.01264   | -0.07628  | -0.576045 | -0.08253  | -0.091264 | -0.292829 |
| Cj0610 | 1 | 0.178109  | 0.072174  | -0.735764 | 0.256648  | -1.187379 | 0.154065  | 0.392647  | -1.022097 | 0.272979  | 0.223423  | -0.274215 |
| Cj0611 | 1 | 0.203514  | 0.057831  | -0.516429 | 0.247563  | -1.134794 | 0.051442  | 0.188274  | -0.949812 | 0.127633  | -0.041269 | -0.182295 |
| Cj0612 | 1 | 0.108759  | 0.169797  | 0.299245  | 0.08243   | 0.586212  | -0.009263 | -0.188858 | 0.489851  | 0.021053  | -0.079326 | -0.224654 |
| Cj0613 | 1 | 0.026163  | 0.010064  | -1.009553 | -0.314374 | -1.398589 | 0.138028  | -0.261189 | -1.2567   | 0.018064  | -0.003611 | -0.621488 |
| Cj0614 | 1 | -0.393274 | -0.032241 | -0.680151 | -0.024443 | -0.983932 | -0.007087 | 0.167743  | -0.982506 | -0.039785 | -0.099742 | -0.265345 |
| Cj0615 | 1 | -0.017417 | -0.007232 | -0.700873 | -0.004479 | -0.693854 | 0.078473  | -0.060548 | -1.132894 | 0.204516  | -0.141303 | -0.242123 |
| Cj0616 | 1 | -0.065823 | 0.008774  | -0.495125 | -0.021365 | -0.553638 | 0.124196  | -0.122334 | -0.440263 | 0.234624  | -0.361973 | -0.146883 |
| Cj0617 | 1 | -1.001732 | 0.017209  | -0.316528 | -0.284897 | -0.521183 | 0.118891  | -0.21424  | -0.19909  | -0.109048 | -0.32916  | -0.24554  |
| Cj0618 | 1 | -0.724278 | 0.045583  | -0.147042 | 0.042504  | -0.351443 | 0.204391  | 0.157044  | -0.027969 | 0.07738   | 0.005472  | 0.210888  |
| Cj0619 | 1 | 0.039419  | 0.032383  | -0.342269 | 0.083928  | -0.482573 | -0.012024 | 0.031113  | -0.302582 | -0.038747 | -0.157464 | -0.085895 |
| Cj0620 | 1 | 0.008774  | 0.62293   | 0.210389  | -0.077193 | 0.436162  | -0.145286 | -0.224823 | 0.353888  | -0.312044 | -0.066427 | 0.127765  |
| Cj0621 | 1 | -0.116692 | 0.056306  | -1.061601 | 0.026304  | -1.270556 | 0.069427  | 0.085289  | -1.70557  | -0.493703 | -0.069906 | -0.267253 |
| Cj0622 | 1 | -0.086814 | 0.035061  | -0.554485 | 0.167229  | -1.293713 | 0.220206  | 0.299362  | -1.022683 | 0.146655  | 0.062674  | -0.36736  |
| Cj0623 | 1 | 0.066399  | 0.002162  | -0.797864 | 0.380064  | -0.919752 | 0.129085  | 0.394843  | -0.949812 | 0.115832  | 0.217231  | -0.491267 |
| Cj0624 | 1 | -0.075064 | 0.231924  | -0.113723 | 0.066124  | -0.168609 | 0.066261  | -0.02415  | -0.011588 | -0.072634 | -0.098969 | 0.071351  |
| Cj0625 | 1 | -0.040378 | -0.055291 | -0.587923 | -0.296722 | -0.611976 | 0.004465  | 0.161565  | -1.183114 | -0.174621 | -0.176251 | -0.170881 |
| Cj0626 | 1 | -0.168933 | -0.052895 | -0.580569 | 0.068189  | -0.835986 | 0.033511  | 0.334911  | -1.199587 | 0.10017   | 0.024462  | -0.654944 |
| Cj0627 | 1 | 0.154454  | 0.05797   | -0.447721 | 0.033652  | -0.589225 | -0.008827 | 0.037874  | -0.760969 | 0.126841  | 0.232047  | 0.005472  |
| Cj0628 | 1 | -0.756331 | -0.043943 | -0.006942 | 0.884168  | -0.747584 | 0.066399  | 0.187388  | -0.577552 | 0.423847  | 0.330099  | 0.364797  |

|        |   |           |           |           |           |           |           |           |           |           |           |           |
|--------|---|-----------|-----------|-----------|-----------|-----------|-----------|-----------|-----------|-----------|-----------|-----------|
| Cj0629 | 1 | -3.39138  | -1.649729 | -0.408512 | -0.34172  | -1.005493 | -0.91213  | 0.114234  | -1.801883 | -0.185573 | -0.275961 | -0.378569 |
| Cj0630 | 1 | 0.229465  | 0.1038    | 0.139993  | -1.753896 | 0.400319  | -0.131471 | -1.085589 | 0.035342  | -0.253429 | -0.061451 | 0.668482  |
| Cj0631 | 1 | 0.024036  | -0.165208 | 0.037312  | -0.143851 | -0.124534 | -0.192645 | -0.07628  | 0.019773  | -0.299915 | -0.293889 | -0.257218 |
| Cj0632 | 1 | -0.016395 | -0.110449 | 0.09815   | 0.214747  | 0.044744  | -0.142099 | 0.004322  | 0.316957  | -0.061752 | -0.293713 | -0.019463 |
| Cj0633 | 1 | 0.03083   | -0.38628  | -0.112007 | -0.694321 | -0.30668  | -0.306323 | -0.237183 | 0.077653  | -0.404496 | -0.324455 | 0.005616  |
| Cj0634 | 1 | 0.085017  | -0.28736  | 0.040402  | -0.590962 | 0.169925  | -0.408512 | -0.261535 | 0.007339  | -0.59379  | -0.454229 | -0.013771 |
| Cj0635 | 1 | 0.132511  | -0.010425 | -0.472129 | 0.118626  | -0.847103 | -0.066276 | -0.245369 | -1.175599 | -0.264824 | -0.005638 | -0.165208 |
| Cj0636 | 1 | 0.117961  | 0.430392  | 0.321697  | 0.05172   | 0.309176  | -0.119981 | -0.410428 | 0.257735  | -0.429731 | -0.185409 | 0.052833  |
| Cj0637 | 1 | 0.041523  | -0.291592 | 0.042364  | -1.281737 | 0.412294  | -0.323552 | -0.271775 | 0.043624  | 2.842778  | -0.272472 | 0.036046  |
| Cj0638 | 1 | 0.204391  | 0.068327  | -0.449887 | -0.107337 | -0.962126 | -0.164884 | 0.050049  | -0.652448 | 0.118891  | -0.409087 | -0.076128 |
| Cj0639 | 1 | 0.307429  | 0.067639  | -0.752923 | 0.352081  | -0.879914 | -0.016103 | 0.403595  | -1.378194 | 0.390888  | 0.088006  | -0.403733 |
| Cj0640 | 1 | 0.211884  | 0.020058  | -0.215245 | 0.163112  | -0.453241 | 0.030265  | -0.055591 | 0.064883  | 0.211261  | 0.064469  | -0.207061 |
| Cj0641 | 1 | 0.021622  | -0.338798 | -0.082988 | -0.211899 | 0.076422  | -0.002744 | -0.401254 | 0.018207  | -0.211565 | -0.190668 | 0.010637  |
| Cj0642 | 1 | -0.098506 | -0.33061  | -0.02694  | -0.426238 | -0.042903 | -0.258253 | -0.224486 | -0.02503  | -0.237524 | -0.139871 | -0.065823 |
| Cj0643 | 1 | -0.024003 | 0.04977   | -0.332607 | 0.047678  | -0.824699 | -0.049606 | 0.104605  | -0.870651 | 0.065986  | -0.176577 | -0.484388 |
| Cj0644 | 1 | 0.031677  | 0.017779  | -0.094957 | -0.016395 | -0.092186 | -0.151042 | -0.457791 | 0.276675  | 0.023894  | -0.167961 | -0.304006 |
| Cj0645 | 1 | -0.063258 | -0.433623 | 0.057693  | -0.214742 | 0.12446   | -0.327167 | -0.311685 | -0.008247 | -0.156338 | -0.112319 | 0.076559  |
| Cj0646 | 1 | 0.064607  | 0.0297    | -0.331699 | -0.074001 | -0.262746 | -0.152003 | -0.089728 | -0.115129 | -0.216418 | -0.279284 | 0.001154  |
| Cj0647 | 1 | 0.068464  | 0.054918  | -0.114816 | -0.026205 | -0.003033 | -0.101753 | -0.152003 | -0.135745 | -0.145127 | -0.319406 | 0.098689  |
| Cj0648 | 1 | 0.139208  | -0.026646 | -0.490862 | 0.312084  | -0.544561 | 0.037312  | 0.095317  | -0.633076 | 0.235972  | 0.015926  | -0.227692 |
| Cj0649 | 1 | 0.105142  | 0.127105  | 0.189034  | 0.706376  | 0.718088  | 3.756436  | 1.596458  | 0.01035   | -1.674383 |           |           |
| Cj0650 | 1 | 0.307778  | 0.00777   | -0.572394 | 0.160791  | -0.746132 | 0.010637  | 0.168642  | -0.655172 | 0.290306  | 0.154324  | 0.08787   |
| Cj0651 | 1 | 0.129745  | -0.003901 | -0.531156 | 0.078883  | -0.940368 | 0.029842  | 0.129481  | -0.53366  | 0.219958  | 0.111031  | -0.163106 |
| Cj0652 | 1 | 0.209017  | -0.06115  | 0.15095   | 0.095182  | 0.139731  | 0.159758  | 0.032242  | 0.379843  | 0.221568  | 0.122209  | -0.17511  |
| Cj0653 | 1 | 0.016354  | 0.425244  | 0.226385  | 1.407298  | 0.199751  | 0.934403  | 2.30343   | 0.04991   | 5.548705  | 0.737514  | 0.011209  |
| Cj0654 | 1 | 0.056306  | 0.018207  | 0.137241  | -1.02503  | 0.573568  | -0.694788 | 0.785341  | 0.102725  | 0.239642  | 1.583038  | 0.07382   |
| Cj0655 | 1 | -0.778185 | 0.493545  | 0.214871  | 0.7876    | 0.469052  | 1.215368  | 1.61664   | 0.19497   | 1.15374   | -0.167637 | -0.106871 |
| Cj0656 | 1 | 0.268195  | 0.026304  | 0.283211  | 0.23842   | -0.105628 | 0.147307  | 0.16092   | 0.257976  | 0.214747  | 0.158983  | -0.186722 |
| Cj0657 | 1 | 0.135141  | -0.191821 | 0.147958  | -0.287184 | 0.080658  | 0.05464   | -0.094033 | -0.093109 | -0.591179 | -0.056641 | -0.29956  |
| Cj0658 | 1 | 0.292075  | -0.098351 | -0.052296 | 0.104739  | -0.275437 | 0.113567  | 0.135929  | -0.085129 | -0.013917 | 0.095317  | -0.059345 |
| Cj0659 | 1 | -0.511485 | -0.708868 | 0.095182  | 0.072312  | 0.237319  | -0.08024  | -0.062957 | 0.279768  | -0.038895 | -0.005348 | 0.132379  |
| Cj0660 | 1 | 0.15782   | 0.064883  | 0.204516  | 0.25689   | 0.159887  | 0.208892  | -0.008973 | 0.29125   | 0.427284  | 0.323774  | -0.187214 |
| Cj0661 | 1 | -0.041566 | 0.342782  | 0.009204  | -0.123434 | 0.253989  | 0.053111  | -0.324455 | -0.003177 | -0.095728 | -0.0511   | -0.050951 |
| Cj0662 | 1 | -0.167475 | -0.039785 | -0.397638 | 0.392537  | -0.957916 | 0.166972  | 0.416191  | -1.02239  | 0.389457  | 0.311852  | -0.405834 |
| Cj0663 | 1 | -0.212735 | 0.217355  | 0.154583  | -0.016833 | 0.4654    | -0.440851 | -0.304362 | 0.205142  | -0.35716  | 0.148609  | 0.418352  |

ilvC

recN

pbpC

|        |   |           |           |           |           |           |           |           |           |           |
|--------|---|-----------|-----------|-----------|-----------|-----------|-----------|-----------|-----------|-----------|
| Cj0664 | 1 | 1.073752  | 0.934328  | 0.360758  | 0.762902  | 0.634965  | 0.418568  | 0.408494  | -0.287712 | 0.184978  |
| Cj0665 | 1 | -0.09234  | 0.258941  | -0.025471 | 0.07738   | -0.145446 | -0.040527 | -0.158429 | 0.181675  | -0.204233 |
| Cj0666 | 1 | -0.117318 | 0.223793  | 0.104068  | 0.246712  | -0.045431 | -0.111695 | -0.103457 | 0.216734  | -0.450084 |
| Cj0667 | 1 | 0.213503  | 0.281906  | 0.178237  | 0.079293  | 0.289008  | 0.070664  | -0.024443 | -0.063258 | -0.376133 |
| Cj0668 | 1 | 0.225152  | 0.026871  | -0.068544 | 0.121546  | -0.552791 | 0.131458  | 0.043204  | 0.148218  | -0.32916  |
| Cj0669 | 1 | -0.048263 | 0.029559  | -0.241953 | -0.123277 | -0.911316 | -0.064767 | -0.115754 | -0.11591  | -0.305967 |
| Cj0670 | 1 | -0.057392 | 0.021622  | -0.540359 | 0.192825  | -1.155855 | 0.131458  | 0.186247  | -1.115285 | 0.124593  |
| Cj0671 | 1 | 0.185613  | 0.049352  | -0.408512 | 0.318346  | -1.213236 | 0.093966  | 0.141433  | -1.090496 | 0.215492  |
| Cj0672 | 1 | 0.085833  | 0.574441  | 0.260989  | 0.112233  | 0.490878  | -0.022977 | -0.162783 | 0.489851  | -0.117474 |
| Cj0673 | 1 | 0.084881  | -0.053344 | -0.377819 | -0.331881 | -0.664059 | -0.049905 | 0.07519   | -1.045729 | 0.063641  |
| Cj0674 | 1 | 0.002306  | -0.273518 | 0.066399  | -0.309181 | 0.117828  | -0.096036 | 0.029276  | -0.008102 | -0.158751 |
| Cj0675 | 1 | -0.115129 | 0.038577  | -0.464345 | 0.036468  | -0.595533 | -0.052596 | -0.36049  | -0.654717 | -0.057242 |
| Cj0676 | 1 | 0.050745  | -0.027528 | -0.272994 | 0.077653  | -0.549198 | -0.020048 | -0.268643 | -0.148481 | 0.036749  |
| Cj0677 | 1 | 0.013212  | -0.247937 | -0.022977 | -0.428372 | -0.351258 | -0.368849 | -0.127211 | -0.378194 | -0.269164 |
| Cj0678 | 1 | -0.072938 | -0.198427 | 0.085561  | -0.279284 | 0.033652  | -0.104232 | 0.187134  | -0.012315 | 0.082294  |
| Cj0679 | 1 | 0.026588  | -0.276136 | 0.125783  | -0.169258 | 0.770618  | -0.064163 | 0.049631  | 0.193456  | -0.272646 |
| Cj0680 | 1 | 0.139993  | 0.07382   | -0.283843 | 0.250355  | -0.798617 | -0.010861 | -0.039488 | 0.316957  | 0.168899  |
| Cj0681 | 1 | 0.069152  | -0.190339 | -0.196773 | -0.447918 | -0.196277 | -0.204067 | -0.256528 | -0.019902 | -0.07552  |
| Cj0682 | 1 | 0.20063   | -0.183605 | 0.063503  | -0.508814 | 0.249142  | -0.321387 | -0.14401  | 0.035765  | -0.261189 |
| Cj0683 | 1 | 0.241474  | 0.010207  | -0.605815 | 0.364684  | -0.776207 | 0.054362  | -0.058743 | -0.92221  | 0.354226  |
| Cj0684 | 1 | 0.043345  | 0.036468  | 0.218347  | 0.0782    | -0.202904 | -0.173482 | -0.514161 | 0.215989  | -0.105008 |
| Cj0685 | 1 | 0.259062  | -0.038451 | -0.07765  | -0.253601 | -0.685942 | 0.080385  | -0.12312  | -0.210062 | -0.1882   |
| Cj0686 | 1 | 0.093019  | 0.0397    | -0.37314  | -0.117944 | -0.743472 | -0.031209 | -0.005493 | -0.615287 | 0.008343  |
| Cj0687 | 1 | 0.199876  | -0.007377 | -0.507788 | -0.003033 | -1.059495 | 0.152508  | 0.154194  | -0.379883 | 0.247441  |
| Cj0688 | 1 | -0.050054 | -0.059495 | 0.111566  | 0.006478  | -0.234296 | -0.190009 | -0.392137 | 0.476537  | -0.135903 |
| Cj0689 | 1 | -0.643631 | -0.067788 | -0.768076 | 0.130008  | -1.075824 | 0.166458  | 0.269033  | -1.263612 | 0.326767  |
| Cj0690 | 1 | -2.729292 | 0.018777  | -0.265865 | -0.147841 | -0.554697 | 0.095047  | -0.029588 | -0.125006 | 0.004609  |
| Cj0691 | 1 | -0.50943  | 0.020769  | -0.082683 | 0.071213  | -0.145286 | 0.200379  | 0.192699  | 0.000721  | -0.043646 |
| Cj0692 | 1 | -0.396878 | 0.139469  | 0.129745  | 0.190425  | 0.300651  | 0.225275  | 0.029135  | 0.351289  | 0.260989  |
| Cj0693 | 1 | 0.04684   | -0.32572  | 0.095722  | -0.228875 | 0.405775  | -0.021511 | -0.07963  | -0.022097 | -0.157946 |
| Cj0694 | 1 | -0.048711 | 0.005472  | -0.398208 | -0.081919 | -0.911587 | -0.148481 | -0.061601 | -0.879383 | 0.009634  |
| Cj0695 | 1 | 0.028003  | -0.129418 | -0.46176  | -0.09866  | -0.760235 | -0.134794 | -0.246738 | -0.711464 | -0.147362 |
| Cj0696 | 1 | -0.180822 | 0.000721  | 0.23131   | 0.010637  | 0.119555  | -0.12926  | -0.162299 | 0.276199  | -0.105628 |
| Cj0697 | 1 | -0.144489 | 0.052555  | -0.689893 | 0.311387  | -1.102527 | 0.165558  | 0.233275  | -1.240929 | 0.368824  |
| Cj0698 | 1 | -0.073697 | 0.039279  | -0.39517  | 0.081203  | -0.448115 | 0.126841  | 0.082703  | -0.41677  | 0.130931  |

|        |   |           |           |           |           |           |           |           |           |           |           |           |
|--------|---|-----------|-----------|-----------|-----------|-----------|-----------|-----------|-----------|-----------|-----------|-----------|
| Cj0699 | 1 | 0.14978   | -0.015666 | -0.447918 | 0.519944  | -0.916753 | 0.232661  | 0.335598  | -1.130997 | 0.487692  | 0.344715  | -0.415422 |
| Cj0700 | 1 | 0.047399  | 0.048794  | 0.106348  | 0.172744  | 0.210888  | 0.066675  | 0.060186  | 0.346191  | 0.158337  | 0.064469  | 0.044744  |
| Cj0701 | 1 | -0.195781 | -0.147042 | -0.115129 | -0.180168 | 0.004609  | -0.017709 | -0.321387 | -0.046921 | -0.041566 | -0.120137 | -0.183441 |
| Cj0702 | 1 | 0.0229    | -0.093263 | -0.040378 | -0.207228 | 0.186627  | -0.149761 | 0.043764  | -0.057392 | -0.341172 | -0.085129 | 0.075327  |
| Cj0703 | 1 | 0.038577  | 0.045024  | -0.400492 | 0.069015  | -0.598151 | 0.165944  | 0.182946  | -0.298318 | 0.162339  | 0.12499   | -0.200415 |
| Cj0704 | 1 | 0.092343  | -0.025471 | -0.204898 | 0.49968   | -0.343183 | 0.27453   | 0.354791  | -0.707925 | 0.37128   | 0.243425  | -0.528448 |
| Cj0705 | 1 | -0.179351 | -0.277009 | 0.006478  | -0.215747 | 0.00101   | -0.023123 | -0.271601 | -0.068695 | -0.224317 | -0.14178  | -0.015228 |
| Cj0706 | 1 | 0.069977  | 0.059078  | -0.540778 | -0.099896 | -0.698998 | 0.046421  | 0.035765  | -0.210897 | 0.044604  | 0.22132   | 0.037453  |
| Cj0707 | 1 | 0.000289  | -0.192315 | 0.173255  | -0.274564 | 0.36614   | -0.264998 | -0.206562 | 0.293488  | -0.160847 | 0.189666  | 0.097476  |
| Cj0708 | 1 | 0.038998  | -0.02239  | -0.136696 | 0.40414   | -0.378569 | 0.014641  | 0.268674  | -0.70322  | 0.293959  | 0.202762  | -0.546456 |
| Cj0709 | 1 | -0.115441 | -0.024296 | -0.692921 | -0.03934  | -1.201576 | -0.006507 | 0.061154  | -1.415807 | -0.036526 | -0.082377 | -0.377819 |
| Cj0710 | 1 | -0.011733 | -0.005493 | -0.726186 | 0.090176  | -0.995103 | -0.006217 | 0.167101  | -0.979089 | 0.134615  | 0.20389   | 0.175557  |
| Cj0711 | 1 | 0.175684  | -0.009699 | -0.251367 | 0.27011   | -0.491267 | 0.264356  | 0.242938  | -0.361787 | 0.196607  | 0.186247  | -0.408512 |
| Cj0712 | 1 | 0.217355  | -0.011879 | -0.228537 | 0.304161  | -0.35089  | 0.262193  | 0.319618  | -0.304362 | 0.334683  | 0.133432  | -0.242465 |
| Cj0713 | 1 | 0.031395  | 0.027296  | -0.498383 | -0.006072 | -0.846065 | 0.134352  | -0.061601 | -0.390812 | 0.011496  | -0.034308 | 0.088006  |
| Cj0714 | 1 | -0.033865 | 0.424385  | 0.034075  | -0.327167 | 0.152248  | 0.042644  | -0.163914 | 0.074094  | -0.219942 | -0.174621 | 1.640343  |
| Cj0715 | 1 | 0.277271  | 0.033793  | -0.272297 | 0.178237  | -0.288769 | 0.096127  | 0.220949  | 0.03492   | 0.054223  | 0.006334  | 0.457437  |
| Cj0716 | 1 | 0.109561  | 0.488823  | 0.29443   | 0.058386  | 0.362105  | 0.092207  | -0.036674 | 0.413594  | -0.005927 | 0.00863   | 0.565987  |
| Cj0717 | 1 | -0.08253  | 0.04698   | 0.200504  | -0.059946 | 0.282855  | 0.007626  | -0.054692 | -0.09542  | -0.062354 | 0.045163  | 0.038015  |
| Cj0718 | 1 | -0.111695 | -0.075824 | 0.009347  |           | 0.174918  | -0.518701 | -0.314553 | 0.068877  | -0.676918 | -0.415615 | -0.08253  |
| Cj0719 | 1 | 0.169797  | 0.084745  | -0.035786 | -0.119824 | 0.066124  | 0.058109  | -0.008247 | 0.268554  | -0.01917  | 0.048376  | 0.10541   |
| Cj0720 | 1 | 0.105008  | 0.343351  | -0.001588 | 0.139208  | 0.185359  | 0.037031  | -0.121392 | 0.341189  | 0.303459  | 0.24817   | -0.067485 |
| Cj0721 | 1 | 0.069427  | -0.186065 | -0.158268 | -0.393463 | 0.01035   | -0.121706 | -0.104387 | -0.097425 | -0.069906 | -0.032684 | 0.134089  |
| Cj0722 | 1 | 0.160017  | 0.015355  | -0.621488 | 0.110497  | -0.789362 | -0.052147 | 0.341303  | -0.99683  | 0.285461  | 0.20989   | -0.322469 |
| Cj0723 | 1 | 0.083792  | -0.082836 | -0.092648 | 0.010923  | 0.133564  | -0.055891 | 0.080794  | 0.030265  | -0.074912 | 0.124196  | 0.151339  |
| Cj0724 | 1 | 0.01078   | 0.060047  | 0.151859  | 0.146525  | 0.326767  | 0.107018  | -0.086507 | 0.265437  | 0.13829   | 0.143263  | 0.196481  |
| Cj0725 | 1 | -0.011879 | -0.248965 | 0.123269  | -0.288593 | 0.014355  | 0.044884  | -0.140507 | -0.008973 | -0.069452 | -0.185573 | 0.286645  |
| Cj0726 | 1 | 0.002739  | 0.00777   | -0.063108 | -0.123748 | -0.138918 | 0.025596  |           | 0.1333    | -0.159879 | 0.003458  | 0.244887  |
| Cj0727 | 1 | 0.023894  | -0.272472 | 0.093154  | -0.25068  | 0.121413  | -0.222633 | -0.060698 | 0.230326  | -0.456999 | -0.105628 | 0.061569  |
| Cj0728 | 1 | 0.160791  | 0.308244  | 0.27453   | 0.048515  | 0.425996  | -0.019755 | -0.052147 | 0.346191  | -0.205064 | -0.026352 | 0.00619   |
| Cj0729 | 1 | -0.060849 | -0.012024 | -0.345748 | -0.353653 | -0.341903 | -0.054242 | -0.016103 | -0.395549 | -0.044092 | -0.080088 | 0.217355  |
| Cj0730 | 1 | -0.059645 | -0.229382 | 0.107688  | -1.405069 | 0.282025  | -0.644533 | -0.157946 | -0.01217  | -1.255322 | -1.093263 | 0.329525  |
| Cj0731 | 1 | 0.295253  | 0.029842  | 0.093695  | 0.385928  | 0.420294  | -1.32265  | -0.223138 | 0.143524  | -1.324094 | -0.024443 | 0.00245   |
| Cj0732 | 1 | 0.126444  | 0.592732  | 0.284751  | 0.01564   | 0.42374   | -1.631735 | -0.507583 | 0.202762  |           | -0.361231 | 0.77989   |
| Cj0733 | 1 | 0.081749  | -0.315451 | 0.288536  | -1.219942 | 0.227002  | -0.11857  | -0.5245   | 0.012497  | -0.744922 | -0.218598 | -0.053494 |

|        |   |           |           |           |           |           |           |           |           |           |           |           |
|--------|---|-----------|-----------|-----------|-----------|-----------|-----------|-----------|-----------|-----------|-----------|-----------|
| Cj0734 | 1 | 0.052694  | 0.016924  | -0.195616 | -0.18508  | -0.363642 | -0.09234  | -0.092033 | -0.32572  | -0.038451 | -0.006652 | -0.218934 |
| Cj0735 | 1 | 0.209391  | 0.015069  | 0.025312  | 0.010637  | -0.692688 | -0.084823 | 0.090853  | -0.34172  | 0.074916  | -0.02371  | -0.165693 |
| Cj0736 | 1 | 0.087191  | 0.003026  | 0.258338  | -0.048561 | 0.416299  | -0.060397 | -0.170069 | 0.502636  | -0.078411 | -0.151042 | -0.07309  |
| Cj0737 | 1 | -0.881773 | -0.331881 | -0.207728 | -0.223475 | -0.177882 | 0.03337   | -0.201079 | -0.121079 | -0.249651 | -0.256528 | -0.07127  |
| Cj0738 | 1 | -1.587273 | -1.402397 | -0.067636 | -0.5272   | -0.106715 | -0.263092 | -0.175436 | -0.075216 | -0.52533  | -0.301159 | -0.118257 |
| Cj0739 | 1 | -1.54372  | -0.129734 | -0.138283 | -0.009844 | -0.151522 | -0.213906 | -0.550043 | 0.030972  | -0.099742 | 0.1133    | -0.004479 |
| Cj0740 | 1 | -1.778432 | -1.046027 | 0.272262  | -0.140826 | 0.449324  | -0.390245 | -0.289122 | 0.414893  | -0.2624   | -0.215747 | -0.114191 |
| Cj0741 | 1 | -0.240929 | -0.11904  | 0.026446  | -0.315271 | -0.161492 | -0.571322 | -0.455218 | -0.445558 | -0.133211 | -0.059345 | -0.347215 |
| Cj0742 | 1 | 0.074231  | -0.220782 | 0.240864  | -0.301337 | 0.148869  | -0.310611 | -0.103147 | 0.102725  | -0.354391 | -0.052596 | 0.012783  |
| Cj0743 | 1 | 0.0202    | 0.051163  | 0.27739   | 0.340619  | 0.403486  | -5.756331 | -0.354022 | 0.307312  |           | -0.233108 | 0.257855  |
| Cj0744 | 1 | 0.065159  | -0.069755 | 0.185993  | 0.143132  | 0.188907  | -0.011879 | -0.083141 | 0.289598  | -0.011588 | -0.035786 | 0.081067  |
| Cj0745 | 1 | -0.552156 | -0.009844 | -0.416577 | 0.175301  | -0.676918 | 0.208517  | 0.205768  | -0.456801 | 0.239765  | 0.104337  | -0.365686 |
| Cj0746 | 1 | -0.393274 | 0.017352  | -0.300271 | 0.11929   | -0.222633 | -0.153447 | 0.225522  | -0.324455 | 0.111165  | 0.095452  | -0.158429 |
| Cj0747 | 1 | -1.112163 | -0.142099 | -0.093571 | 0.00906   | -0.051848 | -0.380071 | 0.155361  | -0.039933 | -0.004769 | 0.014641  | -0.110916 |
| Cj0748 | 1 | -2.071573 | -0.923578 | 0.038015  | 0.158725  | -0.121706 | -0.467932 | 0.1145    | 0.257252  | 0.267356  | 0.062812  | -0.084058 |
| Cj0749 | 1 | -2.886833 | -2.730249 | -0.099742 | -0.261535 | -0.200747 | -0.076585 | -0.199255 | -0.053045 | -0.149281 | 0.042784  | -0.224317 |
| Cj0750 | 1 | -3.18968  | -1.983932 | -0.174947 | -0.041863 | -0.144648 | -0.032536 | 0.191563  | -0.203735 | 0.006765  | 0.061984  | -0.055291 |
| Cj0751 | 1 | -3.14178  | -1.682233 | 0.187008  | -0.169258 | 0.357721  | -0.153126 | 0.053111  | 0.207518  | -0.361416 | 0.038998  | 0.042364  |
| Cj0752 | 1 | -1.818579 | -0.127999 | 0.324465  | 0.395063  | 0.463518  | -0.435963 | -0.326624 | 0.393197  | -1.274041 | -0.099587 | 0.004897  |
| Cj0753 | 1 | -0.076128 | -0.155855 | 0.127105  | -0.168285 | 0.351854  | -0.042011 | -0.141144 | -0.103612 | -0.10036  | -0.096807 | 0.029418  |
| Cj0754 | 1 | -3.101598 | -2.411963 | 0.095587  | -0.140189 | 0.223175  | -0.313119 | -0.019755 | 0.098015  | -0.332426 | -0.188036 | 0.263996  |
| Cj0755 | 1 | -3.491673 | -1.184097 | 0.161952  |           | 0.230449  | 0.430392  | -0.519735 | 0.226755  |           | -1.09234  | 0.211261  |
| Cj0756 | 1 | 0.080794  | 0.680864  | 0.437973  | 1.878255  | 0.61946   | 1.384271  |           | 0.421371  |           | -1.299028 | 0.242816  |
| Cj0757 | 1 | -0.49716  | -0.132894 | -0.319226 | -0.269164 | -0.477944 | -0.067183 | -0.32283  | -0.10967  | -0.186722 | -0.152805 | -0.142258 |
| Cj0758 | 1 | -0.322469 | 0.007339  | -0.211565 | -0.017709 | -0.600993 | 0.206893  | 0.145873  | -0.187543 | -0.102992 | -0.002744 | 0.005759  |
| Cj0759 | 1 | -0.151522 | 0.02361   | -0.13733  | 0.080385  | -0.067334 | 0.226509  | 0.131063  | -0.051698 | -0.009699 | -0.01844  | -0.126108 |
| Cj0760 | 1 | -0.046623 | 0.649386  | 0.146916  | -0.358639 | 0.349479  | -0.352916 | -0.315271 | 0.405339  | -0.292299 | -0.156177 | 0.282143  |
| Cj0761 | 1 | -0.061752 | 0.218347  | -0.498586 | -0.097579 | -1.025324 | 0.144569  | 0.031395  | -0.445951 | 0.103397  | 0.038436  | 0.052277  |
| Cj0762 | 1 | -0.215915 | 0.076559  | -0.270034 | 0.056029  | -0.461164 | 0.131985  | 0.190425  | -0.052296 | 0.158208  | 0.015783  | 0.318809  |
| Cj0763 | 1 | 0.105142  | -0.027234 | -0.676226 | 0.148218  | -0.866173 | 0.215368  | 0.25544   | -0.53952  | 0.151599  | 0.053389  | 0.256165  |
| Cj0764 | 1 | 0.027154  | 0.667665  | 0.303693  | 0.009777  | 0.459746  | 0.116365  | -0.049606 | 0.488721  | 0.071076  | 0.129217  | 0.312433  |
| Cj0765 | 1 | -0.218095 | 0.003602  | -0.459973 | 0.318461  | -1.276485 | 0.359071  | 0.428678  | -1.434403 | 0.321813  | 0.235727  | -0.490253 |
| Cj0766 | 1 | -0.057091 | 0.015498  | -0.183769 | 0.146916  | -0.672083 | 0.228973  | 0.296663  | -0.343916 | 0.167229  | 0.138028  | 0.004322  |
| Cj0767 | 1 | 0.223793  | 0.175684  | -0.003901 | -0.037118 | 0.137635  | 0.106348  | 0.099766  | 0.252537  | -0.03697  | 0.033088  | 0.210139  |
| Cj0768 | 1 | 0.115566  | 0.244035  | 0.125651  | 0.183074  | 0.116099  | 0.115566  | 0.043064  | 0.41186   | 0.180403  | 0.105544  | 0.144483  |

|        |   |           |           |           |           |           |           |           |           |           |           |
|--------|---|-----------|-----------|-----------|-----------|-----------|-----------|-----------|-----------|-----------|-----------|
| Cj0769 | 1 | 0.00906   | -0.031651 | 1.671475  | 1.847837  | -0.14401  | -0.118414 | -0.334425 | -5.058894 | -0.484187 | 0.306262  |
| Cj0770 | 1 | -0.096345 | 0.046142  | 0.582267  | 6.966692  | -1.812486 | 2.413675  | -1.602964 | 2.593234  |           | 0.485942  |
| Cj0771 | 1 | -0.505124 | 0.212258  | -1.240248 | -0.336974 | -0.574326 | 0.450676  | 1.776357  |           | -0.612196 | 0.339479  |
| Cj0772 | 1 | 0.307545  | 0.521252  | -0.663145 | 1.072586  | 0.629846  | 1.877195  | -0.781653 | 0.893906  |           | 0.204516  |
| Cj0773 | 1 | 0.100305  | -0.082988 | 0.192952  | 1.481816  | 0.282736  | 0.407733  | 0.932364  | -0.031504 | 0.271904  | 0.627327  |
| Cj0774 | 1 | 0.209765  | -0.045878 | 0.226015  | 0.562474  | 0.213005  | -0.232599 | 2.38976   | 0.067914  | 1.142021  | -0.130997 |
| Cj0775 | 1 | -0.015083 | -0.271949 | 0.111566  | -0.181477 | 0.214747  | -0.101598 | 0.060186  | 0.167101  | -0.296368 | -0.055142 |
| Cj0776 | 1 | 0.020769  | 0.322274  | 0.258097  | -0.31563  | 0.360533  | -0.440851 | -0.431287 | 0.218347  | -0.46176  | 0.111833  |
| Cj0777 | 1 | 1.00389   | 0.092478  | 0.177089  | -0.388922 | 0.323312  | -1.510868 | -0.638681 | -0.072179 |           | 0.828225  |
| Cj0778 | 1 | 0.072449  | -0.155052 | 0.034357  | -0.194295 | -0.033422 | -0.17511  | -0.027822 | -0.053494 | -0.133369 | -0.029294 |
| Cj0779 | 1 | -0.041269 | 0.065021  | 0.229096  |           | 0.412511  | 1.147567  | -0.02239  | 0.0842    | -0.067183 | 0.049631  |
| Cj0780 | 1 | 0.095992  | 0.449535  | 0.187514  | 0.124593  | 0.255319  | -0.131313 | -0.322289 | 0.224287  | -0.246224 | 0.078337  |
| Cj0781 | 1 | 0.05464   | -0.522841 | -0.39517  | -1.291239 |           |           | -0.522012 | -0.476137 | 1.194591  | 0.816804  |
| Cj0782 | 1 | -0.238715 | -0.168933 | 2.866651  | -0.002455 | 0.019061  | 1.52677   | 0.991826  | 1.715542  | -1.874084 | 0.688673  |
| Cj0783 | 1 | 0.0229    | -0.285073 | 0.801324  | 1.766086  | -1.433623 | 1.991862  | -0.839854 | -3.127841 | -0.39935  | 0.178492  |
| Cj0784 | 1 | -0.125793 | 0.588709  |           | 1.412944  | 1.595169  |           | -1.583376 | 1.906429  | 4.270992  | 0.277866  |
| Cj0785 | 1 | 0.202888  | -0.109359 | 0.168899  | 1.533613  | 0.373509  | 4.599711  | -2.024443 | -0.138283 | 0.253263  | -0.654036 |
| Cj0786 | 1 | 0.137504  | -0.232939 | 0.289126  | 0.798673  | 0.336398  | 6.980537  | 2.265767  | -0.006942 | 1.068877  | 0.121944  |
| Cj0787 | 1 | 0.247563  | -0.036674 | 0.208392  | -0.321387 | 0.451541  | -0.328797 | -0.128629 | 0.262072  | -0.516842 | -0.031356 |
| Cj0788 | 1 | 0.201257  | 0.272143  | 0.272262  | -0.340441 | 0.538538  | -1.177229 | -0.445755 | 0.410775  | -0.773245 | -0.122805 |
| Cj0789 | 1 | -0.039488 | -0.206395 | 0.228603  |           | 0.28238   | -2.756331 | -0.924399 | 0.067639  | 0.303109  | -0.14178  |
| Cj0790 | 1 | 0.028569  | -0.36086  | 0.161952  | -0.133685 | 0.227741  | -0.145286 | -0.053194 | 0.107286  | -0.484187 | -0.109981 |
| Cj0791 | 1 | 0.222805  | -0.155855 | 0.187894  | -0.43694  | 0.370945  | -0.273169 | -0.139871 | 0.011782  | -0.714302 | 0.197236  |
| Cj0792 | 1 | -0.009408 | 0.089769  | 0.278342  | -0.756331 | 0.605874  | -0.899426 | -0.354759 | 0.400101  | -0.201576 | 0.042504  |
| Cj0793 | 1 | -0.016103 | -0.142258 | 1.541614  |           | 0.552574  | 4.507078  |           | -1.257045 | 0.895147  | 0.965766  |
| Cj0794 | 1 | -0.538891 | -0.081308 |           | 1.611786  |           |           |           | -0.421786 | 1.882878  | 0.372061  |
| Cj0795 | 1 | -0.093879 | -0.08712  | 3.335212  |           | 0.373954  | -1.591614 | -0.046325 | -0.077193 | -1.837532 | -0.458188 |
| Cj0796 | 1 | -0.023856 | 0.722903  | 1.388906  | 1.391933  |           |           | 3.822587  | -4.073393 | 1.762987  | 0.237074  |
| Cj0797 | 1 | 0.052277  | -0.031356 | 0.260869  | 1.218595  | 0.239765  | -0.357899 | 0.734309  | -0.079478 | 0.39605   | -0.731685 |
| Cj0798 | 1 | 0.016924  | -0.105473 | 0.119423  | -0.384584 | 0.667029  | -1.236503 |           | 0.078337  | 0.728399  | -2.432844 |
| Cj0799 | 1 | 0.311503  | 0.168642  | 0.306962  | 0.406319  | 0.540821  | 1.645563  |           | 0.122871  | 1.14509   | -0.057242 |
| Cj0800 | 1 | -0.016979 | 0.461424  | 0.388245  | -0.131313 | 0.473839  | -0.100206 | -0.269686 | 0.462157  | -0.046921 | 0.035483  |
| Cj0801 | 1 | 0.116897  | 0.082975  | 0.198997  |           | 0.3744    | 1.089227  |           | -0.036082 | 1.100507  | 1.959956  |
| Cj0802 | 1 | -0.19413  | -0.014354 | 0.227002  | 1.465609  | 0.390117  | 1.153287  | -0.102682 | 0.133695  | 1.098083  | -1.72261  |
| Cj0803 | 1 | 0.164915  | -0.074456 | 0.219958  | 0.974896  | 0.459222  | -2.119667 | -0.38628  | 0.255078  | -1.054692 | -0.004045 |

cysS

msbA

|        |       |   |           |           |           |           |           |           |           |           |           |           |           |
|--------|-------|---|-----------|-----------|-----------|-----------|-----------|-----------|-----------|-----------|-----------|-----------|-----------|
| Cj0804 | pyrD  | 1 | -0.035786 | 0.275007  | 0.306846  | -0.015374 | 0.499578  | -0.277884 | -0.264651 | 0.333882  | -0.022537 | -0.056341 | -0.102372 |
| Cj0805 |       | 1 | -0.074912 | 0.467488  | -2.454822 | 1.716815  |           | 4.532267  |           |           |           |           | 0.164786  |
| Cj0806 | dapA  | 1 | -0.111072 | 0.166715  |           | 1.624288  | -2.484388 | 0.966578  | -1.76366  | -0.225666 | 1.907814  | -0.004479 | 0.275722  |
| Cj0807 |       | 1 | -0.2567   | 0.758559  | 4.240284  | 0.03956   |           | 0.038155  | 1.247016  |           |           | -4.383831 | 0.325962  |
| Cj0808 |       | 1 | 0.033652  | 1.096869  | -2.784881 | 0.861241  |           | 0.811389  | 0.988412  | 3.924252  |           | 0.423094  | 1.018634  |
| Cj0809 |       | 1 | 0.123666  | 0.938775  | 0.094777  | 1.348799  | 0.248049  |           |           | -0.021804 | 0.892896  |           | 0.15056   |
| Cj0810 | nadE  | 1 | -0.275961 | 0.678973  | 0.067088  | 1.344942  | 0.19862   | 1.17645   | 0.093695  | 0.015212  | 2.022723  | 1.040191  | 0.598651  |
| Cj0811 | lpxK  | 1 | 0.066124  | 0.275365  | 0.046561  | -0.1938   | 0.159629  | -0.278409 | -0.151522 | 0.175557  | -0.215412 | 0.308594  | 0.437015  |
| Cj0812 | thrC  | 1 | 0.221568  | 1.026871  | 0.245739  |           | 0.616358  | 0.651408  |           | 0.5065    | 0.01407   | 0.53963   | 1.099295  |
| Cj0813 | kdsB  | 1 | 0.007339  | 0.459117  | 0.245617  |           | 0.402613  |           |           | 0.013784  |           | -0.488026 | 0.376068  |
| Cj0814 |       | 1 | 0.045723  | 0.03196   | 0.129349  | -0.351995 | 0.237808  | -1.009844 | -0.149921 | 0.093154  | -0.335881 | -0.090189 | 0.019631  |
| Cj0815 |       | 1 | 0.740539  | 0.469261  | 0.240253  | 1.417596  | 0.544189  |           |           | 0.315798  | 1.514602  | 0.277152  | 0.187768  |
| Cj0816 |       | 1 | -0.465142 | 0.989139  | 0.283922  | -7.243318 | 0.686971  | 2.488566  | 0.97695   | 0.479127  |           | 2.761051  | 0.151599  |
| Cj0817 | glnH  | 1 | -0.039933 | -0.021804 | 0.180275  |           | 0.350271  | 0.686254  | 3.68373   | 0.000865  | 1.090989  | -0.676918 | 0.176323  |
| Cj0818 |       | 1 | -0.642279 | -0.319406 | 0.174662  | 0.544683  | 0.402504  | 1.050049  | 2.484963  | 0.018207  | 1.087938  | 1.258338  | 0.284514  |
| Cj0819 |       | 1 | -0.973129 | -0.765376 | 0.099901  | 2.364152  | 0.282143  | -0.606474 |           | 0.029842  |           | 0.158466  | 0.105008  |
| Cj0820 |       | 1 | 0.005328  | 0.266037  | 0.41511   | 0.117296  | 0.397912  |           |           | 0.243547  |           | 0.280481  | 0.071076  |
| Cj0821 | glimU | 1 | -0.099433 | -0.496957 | 0.14509   | -0.562559 | 0.103934  | -0.261708 | -0.240588 | -0.054392 | -0.398018 | -0.164561 | 0.240253  |
| Cj0822 | dfp   | 1 | 0.009347  | -0.33825  | 0.152638  | -0.388167 | 0.084745  | -0.864859 | -0.633524 | 0.059909  | -3.063711 | -0.955116 | 0.361319  |
| Cj0823 |       | 1 | 0.055473  | -0.225835 | 0.151209  | -0.577121 | 0.332737  | -0.407172 | -0.083753 | 0.219215  | -0.134952 | -0.073393 | 0.175812  |
| Cj0824 | uppS  | 1 | 0.017779  | 0.202512  | 0.268913  | -0.148001 | 0.038155  | -0.128787 | -0.337703 | 0.364572  | -0.019755 | -0.046027 | 0.104068  |
| Cj0825 |       | 1 | 0.058109  | -0.136379 | 0.170181  | -0.837274 | 0.159629  | -0.077041 | -0.047368 | -0.089421 | -0.24708  | -0.10067  | 0.385376  |
| Cj0826 |       | 1 | 0.125916  | -0.028852 | 0.18954   |           | 0.620493  | -0.433623 | -0.174947 | -0.000722 | -1.209228 | -0.238204 | 0.429214  |
| Cj0827 | truA  | 1 | 0.283803  | 0.209516  | -0.161169 | -0.349235 | 0.476122  | -0.532407 | -0.675305 | 0.088142  | -0.540149 | 0.165815  | 0.374845  |
| Cj0828 |       | 1 | -0.168123 | 0.137241  | 0.161178  | -0.362529 | 0.32964   | -0.99223  | -0.37258  | 0.322274  | -1.011879 | -0.125321 | 0.073409  |
| Cj0829 |       | 1 | -1.107182 | -0.141144 | 0.190552  | 3.557961  | 0.301236  | -0.264478 | -1.074304 | 0.012211  | -1.074608 | -1.124063 | -0.356606 |
| Cj0830 |       | 1 | 0.287709  | 0.1038    | 0.349931  | 2.969915  | 0.383497  | 1.652418  |           | 0.034216  | 0.814837  | 0.07779   | 0.275961  |
| Cj0831 |       | 1 | -0.225835 | 0.083111  | 0.429643  | 1.620258  | 0.488515  | 0.072449  | 2.881273  | 0.299714  | -0.109981 | 0.35321   | -0.183933 |
| Cj0832 |       | 1 | 0.05894   | 0.053389  | 0.28404   | 0.090176  | 0.372841  | -0.038451 | -0.009553 | 0.422556  | 0.055057  | 0.058663  | -0.103457 |
| Cj0833 |       | 1 | 0.073409  | -0.188858 | 0.125122  |           | 0.407951  |           |           | 0.020627  | 3.032136  |           | -0.424688 |
| Cj0834 |       | 1 | -0.146403 | 0.03984   | 0.243425  |           | 0.524766  | 1.086784  | 0.435522  | 0.034216  | 1.05894   | 0.303576  | 0.304861  |
| Cj0835 |       | 1 | 0.380064  | -0.060247 | 0.27023   | 0.302875  | 0.495183  | 1.393746  |           | 0.240864  | 2.348657  | 0.15549   | 0.191436  |
| Cj0836 | ogt   | 1 | 0.025738  | 0.098554  | 0.271545  | 0.099497  | 0.215989  | -0.044092 | -0.150881 | 0.343465  | 0.00906   | -0.02283  | -0.107337 |
| Cj0837 |       | 1 | 0.102457  | -0.35716  | 0.070527  | -0.218598 | -0.093725 | -0.037858 | -0.114504 | -0.026499 | -0.155695 | -0.010134 | 0.127369  |
| Cj0838 |       | 1 | -0.016103 | -0.222801 | 0.158466  |           | 0.100843  | -0.95288  | -0.211565 | 0         | -0.910231 | -0.234635 | 0.086784  |



|        |   |           |           |          |           |          |           |           |           |           |           |           |
|--------|---|-----------|-----------|----------|-----------|----------|-----------|-----------|-----------|-----------|-----------|-----------|
| Cj0839 | 1 | 0.085833  | -0.211231 | 0.256165 | -0.595969 | 0.450169 | -0.84451  | -0.335699 | 0.183328  | -0.675305 | -0.06356  | 0.113434  |
| Cj0840 | 1 | 0.125783  | 0.155749  | 0.275603 | 0.222063  | 0.297954 | -0.063108 | -0.223138 | 0.473008  | 0.11836   | 0.012497  | -0.013334 |
| Cj0841 | 1 | 0.098554  | 0.032806  | 0.145873 |           | 0.421371 | -1.13733  |           | -0.044538 |           | 0.536451  | 0.000144  |
| Cj0842 | 1 | -0.054242 | -0.016249 | 0.092884 | 0.350497  | 0.609566 | 1.329124  |           | 0.061984  | 1.621759  |           | 0.009777  |
| Cj0843 | 1 | 2.819075  | -0.000577 | 0.241123 | 0.339365  | 0.525167 |           | -0.060849 | 0.25689   | 2.326336  | 1.935384  | -0.178045 |
| Cj0844 | 1 | 0.271665  | 0.540226  | 0.357383 | 0.347439  | 0.587365 |           |           | 0.407407  | 0.159112  | -0.247423 | -0.134794 |
| Cj0845 | 1 | -0.172344 | -0.118884 | 0.16221  | -0.064465 | 0.167615 | 0.158337  | -0.086201 | -0.081003 | -0.072028 | 0.016639  | -0.19314  |
| Cj0846 | 1 | 0.013784  | -0.127211 | 0.093425 | -0.102682 | 0.362442 | -0.319586 | -0.190009 | 0.07902   | -0.55703  | 0.027437  | 0.283685  |
| Cj0847 | 1 | -0.171856 | 0.405121  | 0.274888 |           | 0.603217 | -0.01028  |           | 0.271665  | -1.630394 | -0.178698 | 0.370388  |
| Cj0848 | 1 | 0.002595  | 0.526369  | 0.406646 | -0.01552  | 0.511063 | 0.078063  | -0.135428 | 0.462052  | 0.0297    | 0.01264   | 0.043904  |
| Cj0849 | 1 | 0.030548  | -0.240929 | 0.117296 | -0.095728 | 0.130931 | -0.02841  | -0.151202 | 0.016924  | 0.007052  | 0.007339  | -0.187871 |
| Cj0850 | 1 | 0.08692   | -0.312939 | 0.203514 | -0.079021 | 0.234501 | 0.011209  | 0.003602  | 0.062674  | 0.000289  | 0.014641  | 0.129481  |
| Cj0851 | 1 | -0.1181   | 0.171207  | 0.200881 | -0.481364 | 0.473423 | 0.417704  | -1.642955 | 0.209641  |           | 0.511266  | 0.283566  |
| Cj0852 | 1 | -0.29442  | 0.777115  | 0.425137 |           | 0.713344 | 0.918157  | 0.745711  | 0.443925  | 1.559883  | -1.279284 | -0.004624 |
| Cj0853 | 1 | 0.053111  | 0.462681  | 0.174279 | 1.672923  | 0.206768 | 0.538637  | 1.436428  | -0.101289 | -2.377819 | -2.490051 | -0.052296 |
| Cj0854 | 1 | -0.040823 | 0.256648  | 0.131853 | 1.204266  | 0.221815 | 0.707171  | 0.982364  | 0.091937  | 0.594644  | 0.500598  | 0.181548  |
| Cj0855 | 1 | 0.048376  | 0.661658  | 0.164271 | 0.760434  | 0.521754 | 1.096329  | 0.348119  | 0.344488  | 1.162855  | 1.001154  | 0.50853   |
| Cj0856 | 1 | 0.134878  | 0.488926  | 0.832201 | -0.883369 | 0.508429 | 0.400647  | 0.182311  | 0.438719  | 0.09126   | 0.206143  | 0.396708  |
| Cj0857 | 1 | -0.033274 | 0.635058  | 0.051859 |           | 0.17031  | -0.72142  | -0.96917  | 0.002595  | -0.966912 | -0.028558 | 0.094641  |
| Cj0858 | 1 | -0.149281 | 0.315102  | 0.011066 | -0.0836   | 0.285225 | -0.08896  | -0.326263 | 0.050745  | 0.037874  | -0.02283  | 0.447315  |
| Cj0859 | 1 | 0.186374  | 1.097948  | 0.159112 | 0.545079  | 0.423847 | 0.662844  | 0.557386  | 0.28238   | 2.59065   | 1.147437  | 1.402231  |
| Cj0860 | 1 | 0.257614  | 1.07382   | 0.341758 |           | 0.377624 |           |           | 0.443819  | -0.013917 | -0.235824 | -0.697125 |
| Cj0861 | 1 | 0.032524  | 0.688046  | 0.15017  | 3.198085  | 0.410984 | 0.694479  | 1.636822  | -0.077193 | 1.782157  | -1.568751 | 0.204767  |
| Cj0862 | 1 | 0.002018  | -0.025764 | 0.122606 | 0.004753  | 0.169155 | -0.050502 | -0.055441 | 0.105678  | 0.050328  | 0.093425  | -0.099124 |
| Cj0863 | 1 | -0.069755 | 0.10675   | 0.185993 | 0.139731  | 0.241962 | 0.019488  | 0.08243   | 0.268794  | 0.005328  | -0.089574 | 0.096802  |
| Cj0864 | 1 | 0.101381  | 0.91196   | 0.274291 |           | 0.655718 | -2.213571 | -0.233108 | 0.509544  | -1.08467  | -1.233786 | 0.897163  |
| Cj0865 | 1 | -0.245027 | -0.067334 | 0.182946 |           | 0.192447 | 0.330214  | 0.985282  | -0.002888 | 0.451435  | -3.258425 | 0.857583  |
| Cj0866 | 1 | 0.255682  | -0.119197 | 0.154324 | 0.849599  | 0.299714 | 1.863502  | 1.669072  | -0.006507 | 1.983094  |           | 0.211635  |
| Cj0867 | 1 | -0.043497 | 0.31603   | 0.236707 | 1.162017  | 0.597221 |           | 1.542753  | 0.090853  | 1.016068  | 2.693922  | -0.174296 |
| Cj0868 | 1 | 1.151924  | 0.811471  | 0.314174 | 2.305562  | 0.710261 | 2.345992  | 1.217169  | 0.297368  | 1.245617  | -2.118414 | 0.684446  |
| Cj0869 | 1 | 0.159371  | -0.036674 | 0.209641 | -0.640704 | 0.328951 | -0.277009 |           | 0.063227  | 1.459799  | 0.241596  | -4.085589 |
| Cj0870 | 1 | 0.07779   | -0.075064 | 0.230203 | 1.832566  | 0.46069  | 1.712596  | 0.146395  | 0.067776  | 0.739243  | 0.577441  | 0.516519  |
| Cj0871 | 1 | 0.16877   | 0.318693  | 0.269632 | 2.228819  | 0.424277 | 0.644133  | 2.311736  | 0.157044  |           | 0.002739  | 0.264476  |
| Cj0872 | 1 | 0.011925  | 1.064814  | 0.298424 | -0.234975 | 0.582267 | 0.743989  | 1.283566  | 0.317072  |           | 1.51919   | 0.277747  |
| Cj0873 | 1 | 0.448372  | 0.378401  | 0.224658 | 1.450538  | 0.19774  | 0.540424  | 0.049352  | -0.065823 | 0.99675   | 0.178874  | -1.486004 |

psd

foID

lepP

dsbB

ast

dsbA

|        |   |           |           |           |           |           |           |           |           |           |
|--------|---|-----------|-----------|-----------|-----------|-----------|-----------|-----------|-----------|-----------|
| Cj0874 | 1 | -0.021658 | 0.055751  | 0.169284  | -0.696891 | 0.130667  | -6.148161 | -0.048711 | 0.394953  | 0.808838  |
| Cj0875 | 1 | 0.225275  | -0.032094 | -0.107182 | -0.017563 | -0.544771 | 0.008774  | -0.032241 | -0.18295  | 0.089363  |
| Cj0876 | 1 | -0.515192 | 0.753005  | 0.321813  | 0.387142  | 0.351628  | 0.360196  | 0.369159  | -0.156177 | -0.052446 |
| Cj0877 | 1 | 0.183074  | 0.073135  | 0.202386  | -1.25877  | -0.149281 | 0.652901  | -0.067183 | -0.601212 | 0.976144  |
| Cj0878 | 1 | 0.121148  | -0.163591 | 0.282025  | 1.336912  | 0.40523   | -2.52367  | 0.007339  | -0.348868 | 0.215989  |
| Cj0879 | 1 | -0.02371  | 0.403159  | 0.178874  | 0.723515  | 0.49252   | 1.315856  | 0.306496  | -1.141462 | 0.620211  |
| Cj0880 | 1 | -0.040527 | 0.708761  | 0.419539  | 0.399116  | 0.747173  | 0.496002  | 0.699552  | 0.815985  | 1.662752  |
| Cj0881 | 1 | -0.052296 | 0.159887  | 0.096802  | 0.702923  | 0.441165  | 1.084949  | -0.04216  | 0.983386  | 1.872868  |
| Cj0882 | 1 | 0.167101  | 0.165301  | 0.1956    | 1.028074  | 0.513491  | 0.758218  | 0.076559  | 2.305708  | 1.76137   |
| Cj0883 | 1 | -0.623487 | 0.299245  | 0.308477  | 0.380619  | 0.667029  | 0.742955  | 0.27274   | 3.1808    | 2.090887  |
| Cj0884 | 1 | -0.123748 | 0.713432  | 0.353323  | -1.751951 | 0.56003   | 2.66687   | 0.418784  | 0.154713  | 1.188717  |
| Cj0885 | 1 | -0.247251 | 0.038436  | 0.185993  | -0.915119 | 0.389567  | 1.062122  | 0.021195  | -0.021804 | -5.184425 |
| Cj0886 | 1 | 0.125651  | -0.115754 | 0.346645  | 1.22163   | 0.47228   | 1.791939  | 0.097206  | 0.114767  | -1.651541 |
| Cj0887 | 1 | 0.037874  | -0.124849 | 0.241596  | -0.228537 | 0.410775  | -0.488836 | 0.15782   | -0.153767 | 0.154065  |
| Cj0888 | 1 | 0.370388  | 0.778713  | 0.371503  | -0.454427 | 0.59321   | -0.174459 | 0.480989  | 0.509848  | -0.25257  |
| Cj0889 | 1 | 0.014212  | 0.282855  | 0.309176  | 0.9241    | 0.280838  | -0.078107 | -0.042457 | 2.066847  | 0.065434  |
| Cj0890 | 1 | -0.228368 | -0.114035 | 0.205017  | 0.9241    | 0.569005  | 0.105008  | 0.081476  | 0.531269  | 0.130404  |
| Cj0891 | 1 | -0.838564 | 0.409364  | 0.307545  | 0.247198  | 0.603217  | 1.058247  | 0.305095  | 0.918234  | -1.475936 |
| Cj0892 | 1 | -0.471729 | 0.986375  | 0.313246  | 1.143459  | 0.400757  | 0.936742  | 0.461424  | 2.165719  | 0.442015  |
| Cj0893 | 1 | 0.073546  | 0.256165  | 0.309642  | -0.08467  | 0.307312  | 1.064262  | -0.186065 | -0.030325 | 8.112361  |
| Cj0894 | 1 | 0.505383  | 0.284869  | -0.063861 | -2.268817 | 0.490673  | 1.609708  | 0.664483  | 0.092884  | -1.957356 |
| Cj0895 | 1 | -1.153928 | 0.468635  | 0.401849  | 1.734699  | 0.693855  | 1.021338  | 0.236095  | 4.33871   | 0.234992  |
| Cj0896 | 1 | 0.20201   | 1.145677  | 0.391658  | 0.12075   | 0.391658  | -0.027528 | 1.804384  | 0.389126  | 0.117296  |
| Cj0897 | 1 | 0.497229  | 0.005616  | 0.206018  | -2.491673 | 0.356707  | -0.865385 | 4.051772  | -0.021804 | 1.040121  |
| Cj0898 | 1 | 0.140386  | 0.045303  | 0.085833  | 1.743817  | 0.449218  | 3.507795  | -0.396688 | 0.106884  | 2.014927  |
| Cj0899 | 1 | -0.435183 | 0.316957  | 0.16877   | 0.37951   | 0.565597  | 0.191689  | 0.317304  | 1.715234  | -0.928237 |
| Cj0900 | 1 | 0.069427  | 0.786596  | 0.427284  | 2.710018  | 0.632454  | -0.005782 | 0.434562  | -1.176903 | -0.088347 |
| Cj0901 | 1 | 0.167101  | 0.760689  | 0.175045  | 1.906467  | 0.337996  | -0.099124 | -0.104387 | 1.11703   | 1.964251  |
| Cj0902 | 1 | -0.053344 | 0.522458  | 0.121546  | -0.082072 | 0.363339  | 2.678861  | 0.151209  | 0.295018  | 0.259544  |
| Cj0903 | 1 | 0.154972  | 1.176642  | 0.231924  | -0.861972 | 0.555325  | -0.640704 | 0         | 0.316262  | -0.060849 |
| Cj0904 | 1 | -0.144329 | 1.029418  | 0.116764  | 3.418419  | 0.524064  | -0.385149 | 2.07902   | 0.481816  | -0.216753 |
| Cj0905 | 1 | 0.03492   | 0.713344  | 0.0297    | 0.47633   | 0.737427  | -3.296191 | -0.007812 | 1.661202  | 0.844064  |
| Cj0906 | 1 | -0.258598 | 0.927517  | 0.587461  | -0.057392 | 0.464564  | 1.607721  | 0.132643  | -0.093725 | -0.212735 |
| Cj0907 | 1 | 1.401139  | 0.345964  | 0.770195  | 0.665848  | 1.206706  | 4.858836  | 0.216982  | 0.535456  | 1.841007  |
| Cj0908 | 1 |           |           |           |           |           |           | 0.529871  | -1.184425 | 0.777535  |

rpsO

glnQ

|        |   |           |           |           |           |          |           |           |           |           |           |
|--------|---|-----------|-----------|-----------|-----------|----------|-----------|-----------|-----------|-----------|-----------|
| Cj0909 | 1 | -0.341537 | 0.662661  | -0.080851 | 2.472306  | 0.333195 | 1.265617  | -0.044836 | 0.888383  | -0.599899 | -0.792607 |
| Cj0910 | 1 | -0.111851 | 0.36614   | 0.202386  | 1.473008  | 0.343692 | -0.458188 | 0.105812  | -6.454822 | -0.223475 | 1.210638  |
| Cj0911 | 1 | 0.078473  | 0.374956  | 0.276675  | 2.910771  | 0.55159  | 1.160017  | 0.244887  |           | 0.054084  | 0.15056   |
| Cj0912 | 1 | 0.013641  | 0.967169  | 0.315914  | 2.609282  | 0.505789 | -2.004624 | -0.093879 | 0.545968  | -0.337703 | 1.704695  |
| Cj0913 | 1 | 0.045583  | 0.026163  | 0.129481  | 1.643579  | 0.151209 | -0.022537 | 4.329339  | 0.020342  | -0.37034  | 0.404031  |
| Cj0914 | 1 | 0.421802  | -0.127841 | 0.088956  | 0.314523  | 0.331361 | -1.12658  | 0.017494  | 1.024958  | -5.695255 | 0.527571  |
| Cj0915 | 1 | 0.22033   | -0.01057  | 0.238665  | 0.643117  | 0.495081 | 0.507008  | 0.071076  | 0.309642  | -1.126896 | 0.207893  |
| Cj0916 | 1 | -0.765867 | 0.981414  | 0.255924  |           | 0.49057  | 0.134484  | -0.212066 | 0.273337  | 0.852878  | 2.471786  |
| Cj0917 | 1 | 0.186627  | -0.073241 | 0.110363  | 5.473862  | 0.262674 | -1.035934 | -0.017125 | 3.423417  | -1.878321 |           |
| Cj0918 | 1 | 0.656634  | 0.355355  | 0.253021  | 0.196607  | 0.156526 | 0.156526  | 0.01564   |           | -3.074608 | -0.635764 |
| Cj0919 | 1 | -0.128629 | 0.130404  | 0.285816  |           | 0.494672 | -3.529489 | -0.121235 | 0.089498  | -0.580138 | 0.191184  |
| Cj0920 | 1 | 0.08352   | 0.974529  | 0.278223  |           | 0.429321 | -0.441243 | 2.325847  | 0.243913  | -0.121706 | -0.584241 |
| Cj0921 | 1 | -0.600993 | 0.034216  | 0.18954   | -0.057542 | 0.275841 | -2.720707 | 0.217603  | -0.093725 | 3.191594  | 0.307312  |
| Cj0922 | 1 | 0.192825  | 0.233888  | 0.199123  | 1.55768   | 0.315798 | 0.664847  | -0.000144 | 0.779554  | 3.09087   | 0.96377   |
| Cj0923 | 1 | 0.031819  | 0.40523   | 0.355242  | 1.057069  | 0.394075 | 0.569977  | -0.07127  | 0.089905  | 2.440075  | 0.002883  |
| Cj0924 | 1 | 0.205643  | 1.047399  | 0.441802  | -0.960721 | 0.473943 | -0.140189 | 0.087463  | 0.267955  | -0.195286 | -1.511691 |
| Cj0925 | 1 | -0.174621 | -0.560217 | 0.135009  | 0.313246  | 0.306379 | 0.542704  | -0.022537 | 0.626299  | 0.279174  | 0.056861  |
| Cj0926 | 1 | 0.778797  | 0.000721  | 0.067776  | 0.701505  | 0.426962 | 1.415326  | -0.027528 | 1.567205  |           | -0.11466  |
| Cj0927 | 1 | -0.712882 | 0.374511  | 0.33674   | 0.80554   | 0.314755 | 4.204196  | -0.340806 | 0.279768  | 0.994869  | 0.348686  |
| Cj0928 | 1 | 0.270708  | 0.563451  | 0.331705  | 1.28765   | 0.604546 | -0.181968 | 0.423309  | 0.042084  | 2.918882  | -1.756818 |
| Cj0929 | 1 | 0.135404  | 0.163756  | 0.245861  | 0.542308  | 0.283922 | 1.45486   | 0.581303  | 0.057831  | 0.034357  | 3.584217  |
| Cj0930 | 1 | 0.155361  | -0.071876 | 0.29337   | 1.465713  | 0.361207 | 0.426533  | 0.152897  | 0.978562  | -0.697593 | 0.136848  |
| Cj0931 | 1 | 0.065572  | 0.019773  | 0.307429  | 1.036116  | 0.284751 | 0.211012  | 0.107018  | 1.426801  |           | 0.285106  |
| Cj0932 | 1 | -0.148161 | 0.288181  | 0.310573  |           | 0.46874  | 0.64441   | 0.413269  | 0.676087  | -0.796611 | -0.08804  |
| Cj0933 | 1 | -0.286128 | -0.065068 | 0.230203  |           | 0.291014 | 1.871055  | 0.790021  | 0.065848  | 0.401958  | -0.187214 |
| Cj0934 | 1 | -0.595969 | 0.108089  | 0.362442  | 1.640112  | 0.441908 | 1.34409   | 2.507668  | 0.007196  | 0.492315  | -0.968605 |
| Cj0935 | 1 | 0.008057  | -0.065823 | 0.268913  | -0.694788 | 0.247928 | 0.199374  | -1.143054 | 0.304044  | 5.507462  | 0.176961  |
| Cj0936 | 1 | 0.030689  | 0.92448   | 0.44668   | 0.610039  | 0.594166 | 1.536351  | 0.452806  | -0.296722 | 0.409255  | -0.003901 |
| Cj0937 | 1 | -0.033422 | 0.083247  | 0.177471  |           | 0.346305 | 2.695482  | -0.070663 | 1.061776  |           | 0.124725  |
| Cj0938 | 1 | 0.119688  | -0.176414 | 0.171079  |           | 0.516822 | 1.064883  | 4.927119  | 0.00777   | 1.405448  | -0.909689 |
| Cj0939 | 1 | -0.857521 | 0.448055  | 0.250719  | 2.036433  | 0.475292 | -0.275612 | 2.215088  | 0.213503  | 1.323658  | -0.178861 |
| Cj0940 | 1 | 0.535754  | 0.882291  | 0.372506  | 1.297426  | 0.527871 | 0.626953  | 0.367036  | 1.531718  | -0.970582 | -0.836759 |
| Cj0941 | 1 | -0.227016 | -0.166503 | 0.284514  |           | 0.274053 | -1.276485 | -1.433623 | 0.030407  | 7.495953  | -0.378944 |
| Cj0942 | 1 | -0.299028 | 0.025454  | 0.159242  |           | 0.412185 | 0.754374  | 0.804384  | 0.114234  | 1.078405  | 2.120982  |
| Cj0943 | 1 | -0.385714 | 0.293488  | 0.330214  |           | 0.369159 | 1.344885  | 0.27453   | 1.232906  | -0.325359 | -0.221791 |

rpiB

apt

pepA

atpE

|        |   |           |           |           |           |           |           |           |           |           |           |
|--------|---|-----------|-----------|-----------|-----------|-----------|-----------|-----------|-----------|-----------|-----------|
| Cj0944 | 1 | 0.240009  | 0.957469  | 0.443076  | 0.856627  | 0.682573  | 0.370834  | 2.349931  | 0.312897  | 1.205455  | -0.281036 |
| Cj0945 | 1 | -0.363271 | 0.218471  | 0.211386  |           | 0.247685  | -1.18508  | 0.769772  | -0.011443 | -0.145925 | 1.145677  |
| Cj0946 | 1 | 0.1125    | -0.092033 | 0.10675   |           | 0.389677  |           | 1.536501  | 0.1121    | 0.673918  | 0.109695  |
| Cj0947 | 1 | 0.010207  | 0.006908  | 0.289362  | 3.805179  | 0.390338  | 0.317767  |           | 0.265437  | 0.783582  | -2.548776 |
| Cj0948 | 1 | -0.022244 | 0.714136  | 0.425352  |           | 0.522056  | -0.512925 |           | 0.377068  | 0.422879  | -0.211064 |
| Cj0949 | 1 | 0.020342  | 0.655443  | 0.088142  |           | 0.178364  | -1.475936 |           | -0.043795 | 1.102725  | -0.001877 |
| Cj0950 | 1 | -0.112943 | 0.208392  | 0.123004  | -0.858044 | 0.476537  | -1.643856 | -2.300448 | -0.335153 |           | -1.385714 |
| Cj0951 | 1 | 0.0229    | 0.378179  | 0.234256  | -0.54751  | 0.348459  |           | 0.1137    | 0.069152  | -0.461363 | 4.2429    |
| Cj0952 | 1 |           | 1.067914  | 0.307895  | 0.717298  | 0.561595  | 1.569588  | 1.634314  | 0.49211   | 1.788435  | 0.395173  |
| Cj0953 | 1 | -0.000144 | 0.060877  | 0.178747  |           | 0.274769  | -0.897543 | -1.040675 | -0.075976 | -1.157785 | -0.371646 |
| Cj0954 | 1 | -1.127841 | 0.301705  | 0.1995    | 1.331591  | 0.429964  | 0.921284  | 0.467801  | 0.096802  | 0.374177  | 1.158208  |
| Cj0955 | 1 | -0.121863 | 0.400757  | 0.222805  | -1.018001 | 0.536152  |           |           | 0.207768  | 0.552771  | -5.097888 |
| Cj0956 | 1 | -0.083447 | 0.942909  | 0.348572  | 0.423847  | 0.518031  | 0.52647   |           | 0.390117  | -0.909147 | -1.099742 |
| Cj0957 | 1 | -0.069452 | 0.785341  | 0.070252  | -0.557879 | 0.218595  | 2.067811  |           | -0.024296 | 1.100036  | 0.718789  |
| Cj0958 | 1 | 0.941031  | 0.325617  | 0.228849  | 1.081885  | 0.481816  | 0.59827   | 0.868924  | 0.127633  | 0.439144  | 0.160404  |
| Cj0959 | 1 | -0.726424 | 0.690015  | 0.298541  |           | 0.600175  | 2.76992   | -0.187214 | 0.296546  |           | 0.462366  |
| Cj0960 | 1 | 0.084745  | 0.749062  | 0.270947  |           | 0.510861  | -1.286304 | -0.567254 | 0.52667   |           | -1.295836 |
| Cj0961 | 1 | -0.009844 | -0.404496 | 0.114634  | -0.413499 | -0.147522 | -0.250509 | 0.007483  | -0.114504 | -0.213738 | -0.466337 |
| Cj0962 | 1 | 0.041804  | -0.052596 | 0.076149  | -0.167799 | -0.009989 | -0.028705 | 0.095047  | -0.044985 | -0.113567 | -0.26067  |
| Cj0963 | 1 | 0.083656  | 0.006334  | 0.024462  | 0.149389  | 0.078746  | 0.008343  | 0.048515  | 0.046421  | -0.053344 | -0.146883 |
| Cj0964 | 1 | 0.309293  | 0.471552  | 0.187641  | 0.186881  | 0.262072  | 0.163241  | -0.118884 | 0.533264  | 0.203264  | 0.073135  |
| Cj0965 | 1 | -0.142258 | -0.242806 | 0.043064  | -0.416192 | -0.16942  | -0.287889 | -0.254806 | -0.197435 | -0.158107 | -0.434988 |
| Cj0966 | 1 | 0.715278  | 0.069152  | -0.119824 | -0.018732 | -0.256356 | 0.128029  | 0.206893  | -0.10036  | 0.148739  | 0.191942  |
| Cj0967 | 1 | 0.883386  | 0.49334   | 0.294077  | 0.017637  | 0.323312  | -0.326444 | -0.190997 | -0.056341 | -0.215245 | -0.079173 |
| Cj0968 | 1 | 0.327802  | 0.415001  | 0.248656  | 0.157302  | 0.393306  | 0.067226  | -2.073393 | 0.417704  | -0.008827 | 0.008917  |
| Cj0969 | 1 | 0.241474  | -0.532407 | 0.126841  | -0.457791 | 0.084609  | -0.084058 | -0.90996  | -0.084058 | -0.149761 | -0.137648 |
| Cj0970 | 1 | 0.343351  | -0.119981 | 0.026163  | -0.173157 | -0.088347 | -0.09111  | -2.247423 | 0.007339  | -0.224823 | -0.040823 |
| Cj0971 | 1 | 0.283566  | -0.279459 | 0.093695  | -0.21843  | 0.167872  | -0.158912 | -2.796862 | 0.096262  | -0.452649 | -0.063258 |
| Cj0972 | 1 | -0.037858 | 0.845671  | 0.259182  | -0.314912 | 0.354339  | -0.685942 |           | 0.236829  | -0.870915 | -0.411387 |
| Cj0973 | 1 | 0.176067  | -0.044985 | 0.16954   |           | 0.300417  | -0.472729 | -2.495736 | 0.05172   |           | 4.359858  |
| Cj0974 | 1 | 0.235972  | -0.00231  | 0.156397  | -0.295305 | -0.126896 | -0.072634 | -1.710284 | 0.025596  | -0.193635 | -0.004479 |
| Cj0975 | 1 | 0.776104  | -0.006072 | -0.038154 | 0.102188  | -0.018878 | -0.114191 | 0.18409   | 0.23952   | 0.054362  | 0.142871  |
| Cj0976 | 1 | 0.241352  | 0.050467  | -0.201742 | 0.208642  | -0.4856   | 0.107688  | -0.048263 | -0.001588 | 0.161178  | 0.192573  |
| Cj0977 | 1 | -0.019902 | -0.052296 | 0.191942  | -1.169745 | 0.343351  | -1.830332 | -0.531573 | -0.064465 |           | -0.145286 |
| Cj0978 | 1 | -0.101134 | -0.037562 | -0.68571  | 0.119821  | -0.961283 | 0.126576  | -0.293889 | -0.824699 | 0.129349  | 0.07779   |

|        |   |           |           |           |           |           |           |           |           |           |           |           |
|--------|---|-----------|-----------|-----------|-----------|-----------|-----------|-----------|-----------|-----------|-----------|-----------|
| Cj0979 | 1 | -0.064917 | -0.014645 | 0.121546  | 0.206893  | 0.019061  | 0.057554  | -0.027675 | 0.118758  | -0.136854 | -0.075672 | -0.22651  |
| Cj0980 | 1 | -0.238204 | -0.074304 | 0.12499   | 0.085561  | 0.199374  | 0.007626  | -0.077041 | 0.296076  | 0.079975  | -0.065219 | -0.120765 |
| Cj0981 | 1 | -0.412923 | -0.172669 | 0.192447  |           | 0.43082   | -0.780413 | -0.77769  | -0.126108 | -2.22297  | -0.284019 | 0.163241  |
| Cj0982 | 1 | 0.070115  | 0.050606  | -0.224486 | 0.035483  | -0.909689 | -0.098506 | 0.088684  | -0.629501 | 0.040402  | 0.126444  | -0.225835 |
| Cj0983 | 1 | -0.044687 | -0.034308 | 0.147567  | 0.004322  | 0.352871  | -0.110449 | 0.105812  | 0.170822  | -0.033127 | 0.146655  | -0.253773 |
| Cj0984 | 1 | -0.292299 | 0.060186  | 0.257493  | -0.064767 | 0.346758  | -0.208561 | -0.448509 | 0.457332  | -0.173645 | -0.083447 | -0.31581  |
| Cj0985 | 1 | -0.198924 | -0.069603 | -0.023856 | -0.155213 | -0.168771 | -0.137807 | -0.409661 | -0.048114 | -0.316708 | -0.160363 | -0.292475 |
| Cj0986 | 1 | 0.039419  | 0.002018  | -0.468731 | -0.222633 | -0.857783 | -0.658128 | -0.122491 | -0.640479 | 0.004465  | -0.111695 | -0.220446 |
| Cj0987 | 1 | 0.202136  | 0.018064  | -0.431676 | -0.025618 | -0.735043 | -1.252226 | -0.048263 | -0.364013 | 0.050328  | -0.219102 | -0.120765 |
| Cj0988 | 1 | 0.212009  | 0.038296  | -0.120137 | 0.076969  | -0.245027 | -1.680845 | -0.069452 | -0.329522 | 0.296076  | -0.046772 | -0.301693 |
| Cj0989 | 1 | -0.049009 | 0.015926  | -0.822656 | -0.042457 | -1.165531 | -0.487824 | -0.038747 | -0.861448 | 0.21313   | 0.012354  | -0.297254 |
| Cj0990 | 1 | 0.000289  | -0.117787 | -0.514573 | -0.057992 | -0.517048 | -0.179188 | 0.04991   | -0.210563 | -0.109048 | -0.023416 | 0.043204  |
| Cj0991 | 1 | -0.066578 | -0.107648 | 0.153546  | -0.519321 | 0.372172  | -0.401825 | -0.169907 | 0.281312  | -0.22398  | -0.142258 | -0.021658 |
| Cj0992 | 1 | 0.060047  | 0.031819  | 0.076833  | 0.0202    | 0.215119  | -0.014791 | -0.084517 | 0.294665  | 0.195474  | 0.098958  | -0.227016 |
| Cj0993 | 1 | -0.089421 | -0.266385 | -0.171044 | -0.30276  | -0.206063 | -0.167799 | -0.289475 | -0.34795  | -0.331155 | -0.109203 | -0.321928 |
| Cj0994 | 1 | -0.192645 | -0.051997 | 0.005184  | -2.846843 | 0.115699  | -0.641829 | -0.398018 | 0.044604  | -0.554697 | -0.18295  | -0.050204 |
| Cj0995 | 1 | 0.156008  | -0.033422 | -0.238374 | -0.007522 | -0.530948 | -0.051698 | 0.145612  | -0.242123 | -0.020633 | -0.021072 | -0.149601 |
| Cj0996 | 1 | 0.04712   | 0.121281  | 0.252295  | 0.123401  | 0.240253  | -0.022244 | -0.142417 | 0.367818  | 0.236462  | 0.092884  | -0.265865 |
| Cj0997 | 1 | -0.07552  | -0.004914 | -0.380822 | -0.008102 | -0.763416 | 0.041523  | 0.002883  | -0.434208 | 0.096127  | -0.050801 | -0.331336 |
| Cj0998 | 1 | -0.247423 | 0.153676  | -0.01552  | -0.137013 | -0.148321 | 0.038717  | 0.181929  | -0.044687 | -0.109203 | -0.062053 | 0.00777   |
| Cj0999 | 1 | 0.058801  | 0.046561  | -0.348133 | 0.189666  | -0.411004 | 0.169925  | 0.167358  | -0.280335 | 0.040121  | 0.088006  | -0.090342 |
| Cj1000 | 1 | 0.229465  | 0.848317  | 0.245496  | 0.117828  | 0.440314  | 0.10165   | -0.018732 | 0.469678  | 0.195222  | 0.252173  | 0.198117  |
| Cj1001 | 1 | -0.021804 | 0.240375  | -0.014937 | 0.046701  | 0.105008  | 0.155231  | 0.006047  | 0.030124  | 0.087463  | 0.131853  | 0.036749  |
| Cj1002 | 1 | -0.079478 | 0.219958  | -0.166017 | -0.018878 | -0.030472 | 0.105544  | 0.051163  | 0.06571   | -0.008392 | 0.023184  | 0.07779   |
| Cj1003 | 1 | 0.156008  | 0.056445  | -0.633076 | 0.183455  | -0.804148 | 0.191563  | 0.208392  | -0.569394 | 0.119821  | -0.124692 | 0.180148  |
| Cj1004 | 1 | 0.035202  | 0.397803  | 0.112633  | 0.155749  | 0.268195  | 0.137766  | 0.008487  | 0.359409  | 0.242572  | 0.202386  | 0.354452  |
| Cj1005 | 1 | -0.254978 | -0.015228 | -0.883635 | -0.133844 | -1.257045 | 0.123136  | 0.194591  | -1.425075 | 0.043904  | 0.011639  | -0.424688 |
| Cj1006 | 1 | -0.170881 | -0.039488 | 0.000289  | -0.149121 | -0.062806 | -0.01844  | -0.025471 | 0.088006  | -0.156498 | -0.161492 | -0.158912 |
| Cj1007 | 1 | 0.028003  | 0.019061  | -0.155052 | 0.104202  | -0.201244 | 0.021764  | 0.008774  | 0.013069  | -0.00101  | -0.061752 | -0.305075 |
| Cj1008 | 1 | 0.135929  | 0.681134  | 0.397036  | -0.061752 | 0.466236  | -0.04216  | -0.229044 | 0.498149  | -0.003177 | 0.017352  | 0.02432   |
| Cj1009 | 1 | 0.018207  | -0.024737 | -0.347766 | -0.329703 | -0.838822 | 0.000721  | 0.039279  | -0.784135 | -0.079326 | -0.041863 | -0.179025 |
| Cj1010 | 1 | 0.246955  | -0.025177 | -0.346115 | 0.086648  | -0.75755  | -0.04112  | 0.148739  | -0.800375 | 0.255682  | 0.136585  | -0.039488 |
| Cj1011 | 1 | 0.161823  | -0.001155 | -0.071573 | 0.111966  | 0.070801  | 0.332966  | -0.002744 | 0.013212  | 0.126841  | 0.346191  | 0.000433  |
| Cj1012 | 1 | 0.160662  | 0.013069  | -0.117318 | 0.083111  | -0.057392 | 0.468635  | -0.381949 | 0.19774   | -0.04558  | 0.067914  | -0.145446 |
| Cj1013 | 1 | 0.002018  | -0.480961 | -0.343366 | -0.37501  | -0.8497   | -0.1938   | -0.035047 | -0.22989  | 0.018492  | 0.038717  | 0.065572  |

ribA

rpoD

tgt

|        |   |           |           |           |           |           |           |           |           |           |           |           |
|--------|---|-----------|-----------|-----------|-----------|-----------|-----------|-----------|-----------|-----------|-----------|-----------|
| Cj1014 | 1 | 0.016924  | -0.001155 | -0.036526 | -0.412155 | -0.129103 | -0.076889 | -0.020779 | -0.127368 | -0.281036 | -0.121863 | 0.016211  |
| Cj1015 | 1 | 0.063641  | 0.017067  | -0.506968 | -0.038006 | -0.559367 | 0.074642  | 0.038436  | -0.819343 | -0.113411 | -0.011879 | -0.028999 |
| Cj1016 | 1 | 0.148348  | 0.074094  | 0.182438  | 0.175045  | 0.140255  | 0.141302  | 0.010637  | 0.37629   | -0.148961 | 0.068052  | 0.153676  |
| Cj1017 | 1 | -0.047965 | -0.050353 | -0.471929 | -0.232091 | -0.700638 | -0.146403 | 0.14091   | -1.248108 | 0.1149    | -0.03623  | -0.3485   |
| Cj1018 | 1 | 0.127501  | -0.19446  | 0.279174  | -0.617277 | 0.039981  | -0.250165 | 0.054779  | -0.027381 | -0.461164 | -0.366615 | 0.487075  |
| Cj1019 | 1 | 0.014355  | -0.028558 | -0.126658 | 0.047957  | -0.027822 | 0.065297  | -0.032536 | 0.024745  | -0.247765 | -0.01552  | 0.146916  |
| Cj1020 | 1 | 0.043345  | 0.018492  | -0.150241 | 0.333195  | -0.60406  | 0.190299  | -0.270034 | -0.282614 | 0.117296  | 0.133169  | -0.219438 |
| Cj1021 | 1 | 0.000721  | -0.005638 | -0.016395 | -0.269164 | 0.137241  | 0.047399  | -0.127841 | -0.104853 | -0.174947 | -0.00101  | -0.122805 |
| Cj1022 | 1 | 0.030689  | 0.040542  | -0.19446  | -0.005058 | -0.425075 | 0.168129  | 0.065848  | -0.475736 | -0.090342 | -0.070058 | -0.3655   |
| Cj1023 | 1 | -0.004624 | -0.197269 | 0.265317  | -0.067334 | 0.364572  | -0.182622 | -0.135745 | 0.140255  | -0.600337 | -0.046921 | -0.032389 |
| Cj1024 | 1 | 0.011925  | 0.057138  | 0.344374  | 0.026588  | 0.297954  | -0.096807 | -0.154249 | 0.498251  | -0.019609 | 0.078063  | -0.205231 |
| Cj1025 | 1 | -0.136854 | -0.001588 | -0.11951  | -0.233278 | -0.094187 | -0.054992 | -0.061451 | -0.074912 | -0.092648 | 0.012926  | -0.152484 |
| Cj1026 | 1 | -0.079173 | -0.022683 | -0.673463 | -0.115441 | -0.911044 | 0.037171  | -0.03416  | -0.821636 | 0.015355  | 0.054501  | -0.317966 |
| Cj1027 | 1 | 0.050049  | 0.043764  | 0.008057  | 0.038998  | -0.093417 | 0.071763  | 0.074779  | 0.08624   | 0.014784  | 0.017494  | -0.04886  |
| Cj1028 | 1 | -0.336246 | 0.219711  | 0.368936  | 0.117429  | 0.53834   | 0.114234  | -0.152324 | 0.361656  | 0.094236  | 0.11023   | -0.181149 |
| Cj1029 | 1 | 0.104739  | -0.067636 | -0.335699 | -0.111695 | -0.434208 | -0.045729 | -0.01217  | -0.458584 | -0.227523 | -0.067788 | 0.073135  |
| Cj1030 | 1 | 0.07519   | -0.034604 | -0.179678 | -0.110604 | -0.826489 | 0.045583  | 0.043064  | -0.75877  | -0.26067  | -0.162137 | -0.055291 |
| Cj1031 | 1 | 0.205142  | 0.018634  | -0.047517 | 0.004322  | -0.081308 | 0.032101  | 0.05894   | 0.038858  | -0.075672 | 0.00906   | 0.037874  |
| Cj1032 | 1 | -0.005348 | 0.026021  | -0.186722 | 0.146786  | -0.622376 | 0.053667  | 0.01035   | -0.157464 | 0.160017  | 0.133958  | -0.208728 |
| Cj1033 | 1 | -0.038599 | -0.123434 | 0.06226   | -0.161653 | 0.051581  | 0.029135  | -0.12202  | -0.025764 | -0.240418 | -0.211565 | -0.439481 |
| Cj1034 | 1 | 0.108089  | 0.007052  | -0.226004 | -0.147681 | -0.068241 | 0.135404  | 0.072723  | -0.146883 | 0.03956   | 0.043624  | -0.162622 |
| Cj1035 | 1 | 0.063227  | 0.00389   | -0.172344 | 0.015212  | 0.015783  | 0.159112  | 0.037171  | -0.63958  | -0.01348  | 0.115566  | -0.16004  |
| Cj1036 | 1 | 0.138945  | 0.072174  | 0.074642  | 0.036327  | 0.18053   | 0.032947  | 0.001154  | 0.250355  | 0.364348  | 0.182438  | -0.129734 |
| Cj1037 | 1 | -0.203568 | 0.368377  | 0.147697  | 1.249809  | 0.298541  | 1.506653  | -9.287712 | -0.015666 | 0.20201   |           | 1.02432   |
| Cj1038 | 1 | 0.02219   | 0.007626  | -0.595315 | 0.363451  | -1.057091 | 0.230818  | 0.476641  | -0.981651 | 0.269512  | 0.132379  | -0.565972 |
| Cj1039 | 1 | 0.219339  | 0.035202  | -0.19479  | 0.065434  | -0.513131 | 0.059632  | 0.098015  | -0.066881 | -0.043795 | -0.035786 | 0.170822  |
| Cj1040 | 1 | 0.17594   | 0.044884  | 0.118891  | 0.021338  | 0.114367  | 0.103665  | 0.020342  | 0.116099  | 0.162081  | 0.097341  | -0.07036  |
| Cj1041 | 1 | 0.034357  | -0.185737 | -0.109359 | -0.23243  | -0.094803 | -0.038303 | -0.173482 | -0.21073  | -0.171044 | -0.132104 | -0.081614 |
| Cj1042 | 1 | 0.133564  | -0.012606 | -0.356236 | -0.129734 | -0.711464 | 0.221815  | 0.072998  | -0.277359 | -0.114348 | 0.072723  | -0.039785 |
| Cj1043 | 1 | 0.153546  | -0.035047 | -0.330429 | -0.062204 | -0.729053 | 0.057554  | 0.035061  | -0.67738  | -0.027675 | -0.119354 | -0.345931 |
| Cj1044 | 1 | -0.050054 | 0.087734  | 0.413594  | -0.028852 | 0.24184   | 0.130404  | -0.147042 | 0.519844  | 0.049073  | -0.158268 | -0.119354 |
| Cj1045 | 1 | -0.213069 | 0.025029  | -0.074152 | -0.558092 | 0.111298  | 2.060324  | -0.433428 | -0.001443 | -0.231413 | -0.495532 | -0.188365 |
| Cj1046 | 1 | -0.029883 | 0.011353  | -0.017417 | -0.478949 | -0.043349 | -0.285952 | -0.168123 | 0.119688  | -0.333334 | -0.205896 | -0.1938   |
| Cj1047 | 1 | 0.114367  | 0.023468  | -0.01057  | 0.001298  | -0.015958 | -0.035638 | -0.043795 | 0.156138  | -0.198427 | -0.047219 | 0.020058  |
| Cj1048 | 1 | 0.062674  | 0.318346  | 0.167229  | 0.02219   | 0.173767  | 0.06695   | -0.14003  | 0.311736  | 0.037171  | 0.008487  | 0.252537  |

murG

|        |   |           |           |           |           |           |           |           |           |           |           |           |
|--------|---|-----------|-----------|-----------|-----------|-----------|-----------|-----------|-----------|-----------|-----------|-----------|
| Cj1049 | 1 | -0.139713 | 0.017494  | -0.514573 | -0.326263 | -1.023856 | 0.014498  | 0.119821  | -0.440068 | 0.049491  | -0.301515 | -0.27073  |
| Cj1050 | 1 | -0.315092 | -0.168447 | -0.064314 | -0.416385 | -0.314194 | -0.21558  | 0.184471  | 0.136848  | 0.097341  | -0.451662 | -0.18968  |
| Cj1051 | 1 | -0.724039 | -0.873027 | -0.725231 | -0.240077 | -1.529489 | -1.191327 | -0.667493 | -0.312044 | 0.173639  | -0.763905 | -0.162945 |
| Cj1052 | 1 | -0.017271 | 0.00101   | -0.015666 | 0.0229    | -0.174621 | 0.085153  | 0.061292  | 0.390117  | 0.185105  | 0.056722  | -0.060096 |
| Cj1053 | 1 | -0.159235 | -0.037562 | -0.313298 | -0.222633 | -0.85048  | -0.180168 | -0.21843  | -0.329341 | -0.167799 | -0.157946 | -0.248279 |
| Cj1054 | 1 | -0.256183 | -0.015666 | -0.190503 | -0.26067  | -0.483985 | -0.075216 | -0.331155 | -0.050801 | -0.409087 | -0.455416 | -0.255322 |
| Cj1055 | 1 | -1.723087 | 0.0082    | -0.352179 | 0.085425  | -0.772013 | 0.048934  | 0.152119  | -0.587489 | -0.285952 | -0.36736  | -0.167799 |
| Cj1056 | 1 | -0.19479  | -0.014937 | -0.449296 | 0.284514  | -1.158107 | -0.212902 | -0.199421 | -0.59379  | -0.020779 | -0.268817 | -0.270556 |
| Cj1057 | 1 | -0.12926  | -0.028705 | -0.284194 | -0.438307 | -0.542879 | -0.328073 | -0.221455 | -0.474733 | -0.371833 | -0.342086 | 0.069977  |
| Cj1058 | 1 | -0.182459 | 0.002595  | -0.512102 | -0.284194 | -1.027087 | -0.143213 | 0.164658  | -0.623265 | -0.290709 | -0.338615 | -0.464942 |
| Cj1059 | 1 | -0.046176 | 0.023752  | -0.329885 | -0.134002 | -0.511074 | -0.195616 | 0.051302  | -0.173319 | -0.402397 | -0.376695 | -0.202738 |
| Cj1060 | 1 | 0.005903  | 0.280006  | 0.152119  | -0.136537 | -0.118884 | -0.414076 | -0.336428 | 0.319849  | -0.441438 | -0.533242 | -0.012461 |
| Cj1061 | 1 | -0.224992 | -0.257908 | -0.025177 | -1.386846 | -0.115597 | -0.710284 | -0.081003 | 0.029276  | -0.845287 | -0.674153 | -0.059796 |
| Cj1062 | 1 | -0.02327  | -0.079173 | 0.151859  | -0.507378 | 0.241108  | -0.357345 | 0.124593  | 0.058524  | -0.172018 | -0.324636 | 0.014498  |
| Cj1063 | 1 | 0.062812  | 0.105276  | -0.172669 | -0.009408 | -0.101134 | -0.134952 | -0.041417 | 0.041804  | 0.147567  | 0.160275  | -0.209562 |
| Cj1064 | 1 | 0.141302  | 0.881116  | 0.239887  | -0.130839 | 1.011567  | -0.22196  | -0.447131 | 0.275126  | -0.379507 | -0.005927 | -0.054692 |
| Cj1065 | 1 | 0.100709  | -0.052596 | 0.09126   | -0.815275 | 0.387032  | -0.092186 | -0.071421 | -0.024296 | -0.235314 | -0.265691 | 0.136323  |
| Cj1066 | 1 | 0.135272  | -0.104232 | 0.1129    | 0.282973  | -0.621266 | 0.207268  | 0.024745  | -0.651088 | -0.240077 | 0.05172   | 0.05172   |
| Cj1067 | 1 | 0.166587  | -0.046623 | 0.145351  | -0.1938   | 0.113167  | -0.16537  | -0.052446 | 0.226878  | -0.331518 | -0.103302 | -0.12658  |
| Cj1068 | 1 | 0.27274   | 0.515208  | 0.31371   | 0.274053  | 0.341189  | 0.105142  | -0.073393 | 0.306612  | -0.188365 | -0.025471 | 0.247928  |
| Cj1069 | 1 | 0.052555  | -0.310432 | 0.186627  | -0.082225 | -0.244514 | 0.089498  | -0.030914 | -0.01844  | -0.192975 | -0.272646 | 0.136454  |
| Cj1070 | 1 | 0.115433  | -0.270382 | 0.15069   | -0.037266 | -0.117161 | 0.132906  | 0.083656  | 0.06874   | -0.157946 | -0.209228 | -0.040378 |
| Cj1071 | 1 | 0.063779  | -0.190997 | 0.045583  | -0.082988 | -0.107492 | 0.032101  | 0.171975  | 0.193204  | -0.236164 | -0.21843  | 0.178874  |
| Cj1072 | 1 | 0.005184  | 0.004897  | -0.330973 | -0.059345 | -0.854388 | 0.19862   | -0.049158 | 0.022758  | -0.182459 | -0.369967 | -0.354759 |
| Cj1073 | 1 | 0.116897  | -0.025764 | -0.451662 | -0.359934 | -0.600774 | -0.066276 | 0.094912  | -0.599681 | -0.234805 | -0.254806 | -0.133685 |
| Cj1074 | 1 | 0.162726  | -0.144329 | 0.259303  | 0.667847  | 0.36614   | -1.900234 | -0.536796 | 0.06929   | -0.345748 | 0.045862  | 0.045862  |
| Cj1075 | 1 | -0.098506 | 0.09842   | 0.215741  | 0.455229  | 0.455229  | -0.011733 | 0.260387  | 0.260387  | 0.260387  | 0.419107  | 0.419107  |
| Cj1076 | 1 | -0.021951 | 0.214     | 0.350158  | -0.364571 | 0.292782  | -0.35089  | -0.232939 | 0.471864  | -0.092494 | 0.065848  | -0.046325 |
| Cj1077 | 1 | 0.020484  | -0.217256 | 0.114634  | 0.293959  | -0.439481 | -0.249479 | -0.050353 | -0.93016  | -0.113723 | 0.298776  | 0.298776  |
| Cj1078 | 1 | 0.140255  | 0.067776  | -0.03549  | -0.168933 | -0.131945 | 0.06874   | 0.092478  | -0.105163 | -0.087887 | 0.049073  | -0.074912 |
| Cj1079 | 1 | 0.172359  | -0.02503  | -0.476538 | 0.312549  | -0.663602 | 0.000289  | 0.272979  | -0.401825 | 0.19333   | 0.165815  | -0.352363 |
| Cj1080 | 1 | -0.258425 | -0.127999 | 0.251446  | -0.103457 | 0.193583  | -0.226004 | -0.392426 | 0.505993  | -0.295128 | -0.176577 | -0.273692 |
| Cj1081 | 1 | -0.367918 | 0.026021  | -0.597496 | -0.179678 | -1.165531 | 0.032242  | -0.12202  | -1.065823 | -0.291415 | -0.275786 | -0.538262 |
| Cj1082 | 1 | -0.137648 | -0.023416 | -1.0145   | -0.483581 | -1.076737 | -0.287889 | -0.263785 | -0.892446 | -0.212568 | -0.198593 | -0.414653 |
| Cj1083 | 1 | -0.032831 | -0.188693 | 0.065848  | -0.29018  | 0.148869  | -0.346665 | -0.136696 | 0.207143  | -0.224149 | -0.140348 | -0.380822 |

|        |   |           |           |           |           |           |           |           |           |           |           |           |
|--------|---|-----------|-----------|-----------|-----------|-----------|-----------|-----------|-----------|-----------|-----------|-----------|
| Cj1084 | 1 | 0.038296  | 0.46069   | 0.551688  | 0.482642  | 0.59579   | -0.245198 | -0.300981 | 0.385928  | -0.011588 | -0.098815 | 0.00906   |
| Cj1085 | 1 | -0.164723 | -0.466536 | 0.031254  | -0.308109 | -0.178045 | -0.046325 | -0.124534 | -0.116848 | -0.279809 | -0.26708  | -0.160685 |
| Cj1086 | 1 | -0.388733 | -0.457395 | 0.130667  | -0.087887 | 0.190172  | -0.116848 | -0.171856 | 0.101785  | -0.542879 | -0.130681 | 0.105276  |
| Cj1087 | 1 | -0.030914 | -0.327529 | 0.368712  | -0.20573  | 0.402831  | -0.137648 | -0.199255 | 0.228603  | -0.478949 | -0.07476  | -0.235654 |
| Cj1088 | 1 | -0.060397 | 0.040402  | 0.172103  | -0.046474 | 0.196985  | -0.155052 | -0.527408 | 0.494876  | 0.054362  | -0.061902 | -0.076128 |
| Cj1089 | 1 | -0.201079 | -0.026058 | 0.225152  | -0.20025  | 0.352194  | -0.243489 |           | -0.176903 | 0.323197  | -4.590745 | -0.562346 |
| Cj1090 | 1 | 0.03083   | -0.277884 | 0.033934  | -0.20025  | 0.204516  | -0.881507 | -0.323552 | 0.114634  | -0.267948 | -0.13733  | -0.132736 |
| Cj1091 | 1 | -0.016395 | 0.174918  | 0.244522  |           | 0.403922  | 0.112767  | -0.59837  | 0.268674  |           | -0.336792 | 0.234379  |
| Cj1092 | 1 | -0.001732 | 0.342669  | 0.377735  | 0.008057  | 0.488309  | -0.21625  | -0.137965 | 0.409581  | -0.005058 | 0.023326  | -0.026352 |
| Cj1093 | 1 | -0.177719 | -0.021511 | -0.963813 | 0.058247  | -1.618827 | 0.134089  | -0.031651 | -1.382702 | 0.002018  | -0.114816 | -0.15682  |
| Cj1094 | 1 | 0.016211  | 0.038436  | -0.69129  | 0.241474  | -0.966912 | 0.138945  | 0.2949    | -1.302938 | 0.301236  | 0.25689   | 0.068602  |
| Cj1095 | 1 | 0.329296  | 0.157302  | -0.168447 | 0.196481  | -0.007667 | 0.116099  | 0.097206  | 0.08243   | 0.075738  | 0.23842   | 0.263034  |
| Cj1096 | 1 | 0.25181   | 0.431569  | 0.226262  | -0.094649 | 0.465609  | 0.011209  | -0.082377 | 0.533663  | 0.021622  | -0.057542 | 0.379288  |
| Cj1097 | 1 | -0.054392 | -0.092956 | 0.058801  | -0.580138 | 0.006047  | -0.051549 | -0.137648 | -0.052745 | -0.280159 | -0.100979 | -0.46953  |
| Cj1098 | 1 | -0.119824 | -0.10036  | 0.145873  | -0.713592 | 0.182692  | -0.164723 | -0.064767 | 0.096532  | -0.264305 | -0.073545 | -0.57906  |
| Cj1099 | 1 | 0.102188  | 0.190678  | 0.229957  | -0.080545 | 0.324695  | -0.127368 | -0.028116 | 0.200379  | -0.117005 | -0.00231  | 0.008774  |
| Cj1100 | 1 | -0.032094 | 0.580917  | 0.29901   | -0.355498 | 0.471864  | -0.301693 | -0.207894 | 0.42975   | 0.122341  | -0.053643 | -0.072483 |
| Cj1101 | 1 | 0.07738   | 0.382501  | 0.012354  | -0.735764 | 0.29337   | 0.131853  | -0.265171 | -0.071421 | -0.782149 | -0.190668 | -0.208561 |
| Cj1102 | 1 | -0.04216  | 0.178619  | 0.152248  | 0.100036  | 0.080658  | 0.007483  | -0.096962 | 0.115433  | -0.227354 | -0.133844 | 0.08352   |
| Cj1103 | 1 | 0.24817   | 0.668755  | 0.230572  | -1.374075 | 0.439357  | -0.491876 | -0.261881 | 0.301588  | -0.652221 | 0.083656  | 0.198243  |
| Cj1104 | 1 | 0.174279  | 1.081203  | 0.271067  | 0.531868  | 0.494979  | -0.029735 | -0.090957 | 0.532267  | 0.012926  | 0.290896  | 0.328836  |
| Cj1105 | 1 | -0.014062 | -0.02459  | -0.138759 | -0.348317 | -0.220614 | -0.172831 | -0.131945 | -0.333698 | -0.246909 | -0.207394 | 0.077516  |
| Cj1106 | 1 | -0.06356  | 0.035765  | -0.581432 | -0.119981 | -0.753896 | -0.08758  | 0.035342  | -0.671853 | 0.027154  | 0.006908  | 0.013212  |
| Cj1107 | 1 | 0.002162  | -0.355867 | 0.217975  | 0.146916  | 0.245131  | -0.12202  | 0.195474  | 0.096667  | -0.062505 | 0.06929   | 0.252295  |
| Cj1108 | 1 | -0.699466 | 0.617863  | 0.321582  | -0.136379 | 0.420509  | -0.564691 | -0.30561  | 0.279412  | 0.091124  |           | 0.422879  |
| Cj1109 | 1 | 0.038296  | -0.162137 | -0.028705 | -0.279634 | -0.188529 | 0.036749  | 0.047259  | -0.071573 | -0.100206 | -0.135269 | 0.330903  |
| Cj1110 | 1 | 0.028993  | -0.171856 | -0.00101  | -0.157946 | 0.063641  | -0.095265 | 0.133432  | -0.001155 | -0.216418 | -0.101134 | 0.282855  |
| Cj1111 | 1 | 0.159242  | 0.027437  | 0.23634   | -0.966348 | 0.33308   | -0.527408 | -0.284019 | 0.081476  | -1.084058 | 0.002018  | 0.170438  |
| Cj1112 | 1 | 0.126576  | 0.724301  | 0.184978  | -0.086814 | 0.499476  | -0.384019 | -0.570679 | 0.266757  | -0.401635 | -0.08896  | 0.232047  |
| Cj1113 | 1 | -0.085589 | -0.478547 | 0.109294  | -0.514779 | -0.027087 | -0.546878 | -0.424881 | -0.073849 | -0.341537 | -0.222801 | 0.322044  |
| Cj1114 | 1 | -0.369781 | 0.141302  | 0.167101  | 0.315102  | 0.353662  |           | -0.503282 | -0.019463 |           | -4.53952  | 0.585251  |
| Cj1115 | 1 | -0.331881 | 0.159242  | 0.230572  | -0.32916  | 0.381726  |           | -0.39954  | 0.124593  | 3.004861  | -2.447721 | 0.472592  |
| Cj1116 | 1 | 0.397474  | 0.670659  | 0.0229    |           | 0.666393  | -0.953718 | -0.059946 | 0.286526  |           | -0.19281  | 0.392867  |
| Cj1117 | 1 | 0.066261  | -0.170069 | 0.02432   | -0.166989 | -0.039044 | 0.127369  | -0.096499 | -0.179515 | -0.206063 | -0.127683 | 0.185867  |
| Cj1118 | 1 | 0.083928  | -0.281211 | 0.158208  | -0.396688 | 0.173895  | -0.022537 | -0.127526 | 0.051859  | -0.462157 | -0.251882 | -0.014354 |



|        |   |           |           |           |           |           |           |           |           |           |           |           |
|--------|---|-----------|-----------|-----------|-----------|-----------|-----------|-----------|-----------|-----------|-----------|-----------|
| Cj1119 | 1 | -0.020487 | -0.359749 | -0.008392 | 0.072998  | 0.16221   | -0.402588 | -0.012024 | 0.106348  | -0.233617 | -0.065219 |           |
| Cj1120 | 1 | 0.013498  | 0.13606   | 0.205267  | -0.297254 | 0.199876  | -0.381385 | -0.215915 | 0.429214  | -0.201742 | -0.26986  | -0.346115 |
| Cj1121 | 1 | -0.13005  | -0.022537 | -0.320486 | -0.267253 | -0.274739 | -0.142258 | -0.086814 | -0.356421 | -0.254806 | -0.099124 | -0.111072 |
| Cj1122 | 1 | -0.580353 | -0.633972 | 0.284396  | -1.132578 | 0.296898  | -2.073393 | -0.022097 | 0.107286  | -0.716908 | -0.303116 | 0.443925  |
| Cj1123 | 1 | 0.040682  | -0.076889 | 0.008917  | -0.099278 | -0.098969 | -0.156498 | -0.037562 | 0.021906  | 0.04991   | -0.086967 | -0.054842 |
| Cj1124 | 1 | -0.14003  | -0.144648 | 0.164658  | -0.075368 | 0.278104  | -0.354022 | -0.338615 | 0.387473  | -0.198759 | -0.343    | -0.053793 |
| Cj1125 | 1 | -0.126266 | -0.299028 | 0.158337  | 2.195001  | 0.193961  | -3.403542 | -0.063258 | 7.834736  | -0.009699 |           |           |
| Cj1126 | 1 | 0.028145  | -0.196442 | 0.23352   | 0.599889  | 0.441696  | 1.096532  | 4.487383  | 0.074505  | 0.341872  | 1.560764  | 0.374622  |
| Cj1127 | 1 | 0.060186  | -0.296368 | 0.160791  | -0.21558  | 0.212881  | -0.240929 | -0.021951 | 0.396159  | -0.355498 | -0.165208 | -0.062053 |
| Cj1128 | 1 | 0.10675   | 0.132906  | 0.321466  | -3.587273 | 0.391108  | -1.543299 | -0.500014 | 0.461738  |           | -0.419083 | -0.207561 |
| Cj1129 | 1 | -0.227692 | -0.188693 | 0.007196  | -0.499402 | -0.064163 | -0.210396 | -0.249479 | -0.082683 | -0.263092 | -0.141939 | -0.464544 |
| Cj1130 | 1 | -0.228875 | -0.243318 | 0.051998  | 2.923834  | 0.135141  | -0.285073 | -0.25257  | 0.066261  | -0.64318  | -0.169582 | -0.079173 |
| Cj1131 | 1 | -0.058142 | -0.033865 | -0.54751  | -0.1181   | -0.66246  | -0.170719 | 0.168257  | -0.593572 | 0.103397  | -0.034604 | -0.340441 |
| Cj1132 | 1 | -0.088193 | 0.34301   | 0.520347  | -0.12658  | 0.47176   | 0.028286  | -0.187214 | 0.444667  | -0.083906 | -0.068846 | -0.180332 |
| Cj1133 | 1 | -0.185409 | 0.00777   | -0.835986 | -0.270904 | -0.806417 | -0.003322 | -0.12202  | -1.483985 | 0.040542  | 0.030972  | -0.52824  |
| Cj1134 | 1 | -0.14003  | 0.028145  | -0.0511   | -0.003322 | -0.054692 | -0.196608 | -0.108892 | 0.056722  | 0.014927  | 0.153546  | -0.075672 |
| Cj1135 | 1 | -2.366615 | 0.025454  | 0.072998  | 0.085425  | 0.026304  | -4.506353 | -0.330066 | 0.206393  | 0.005472  | 0.002162  | -0.155052 |
| Cj1136 | 1 | -2.412731 | -0.094033 | -0.084211 | 0.09356   | -0.060397 | -3.316169 | -1.888434 | 0.102188  | 0.173511  | 0.14496   | -0.216753 |
| Cj1137 | 1 | -1.882571 | -0.952601 | 0.043484  | -1.885766 | -0.253429 | -5.117787 | -0.128787 | -0.128787 | -2.058293 | -0.047517 | -0.038303 |
| Cj1138 | 1 | -3.180495 | -1.33061  | 0.070115  | -0.602307 | 0.121413  | -2.674844 | 0.049352  | -0.323191 | -0.11904  | -0.107026 |           |
| Cj1139 | 1 | -2.235144 | -1.092956 | 0.140517  | 0.051581  | -0.066427 | -3.398969 | -2.15457  | 0.23634   | -0.025177 | -0.077498 | -0.114816 |
| Cj1140 | 1 | -2.194955 | -1.679458 | 0.316493  | -0.043497 | 0.407625  | -3.731206 | 0.520246  | 0.520246  | 0.051859  | 0.085017  | -0.180986 |
| Cj1141 | 1 | -1.486408 | -0.380822 | 0.08243   | -0.75268  | 0.121015  |           |           | -0.008392 | -0.063711 | 0.002306  | 0.016639  |
| Cj1142 | 1 | -1.062505 | -0.838564 | -0.072634 | -0.117944 | 0.061569  | -3.287712 | -2.189022 | 0.079566  | -0.10967  | -0.083906 | 0.178492  |
| Cj1143 | 1 | -1.6579   | -1.600774 | 0.100709  | 0.266517  | 0.331591  | -3.990796 | -2.635764 | 0.300885  | -0.015083 | -0.051698 | 0.432318  |
| Cj1144 | 1 | -1.282439 | -0.572394 | -0.649955 | 0.443607  | -0.571536 | -2.910502 | -2.463549 | -0.619936 | 0.492622  | 0.280838  | 0.459117  |
| Cj1145 | 1 | -0.945638 | -0.009118 | -0.483783 | -0.023856 | -1.032094 | -1.615287 | -1.359564 | -0.904818 | 0.081885  | 0.031113  | -0.29018  |
| Cj1146 | 1 | -0.111539 | 0.023468  | -0.031209 | -3.602964 | 0.276318  | -0.691523 | -1.283492 | 0.113567  | -0.649729 | -0.201908 | -0.055441 |
| Cj1147 | 1 | -0.005638 | 0.277628  | 0.297954  | -0.037414 | 0.585347  | -0.415807 | -0.200581 | 0.204892  | -0.149121 | 0.020911  | 0.093831  |
| Cj1148 | 1 | 0.143655  | 0.757109  | 0.349705  | -0.08253  | 0.608809  | -0.650861 | -0.634196 | 0.555424  | -0.314015 | -0.062806 | 0.12075   |
| Cj1149 | 1 | 0.176961  | 0.288299  | 0.095182  | -0.461363 | 0.198368  | -0.427207 | -0.354206 | -0.123277 | -0.545403 | -0.135111 | -0.082836 |
| Cj1150 | 1 | -0.07628  | -0.013334 | -0.008102 | -0.276136 | -0.103302 | -0.496142 | -0.155695 | 0.104873  | -0.309359 | -0.575615 | -0.148801 |
| Cj1151 | 1 | 0.162081  | 0.165815  | -0.139713 | -0.292829 | 0.041383  | -0.156177 | -0.113567 | 0.134484  | -0.139395 | -0.450479 | -0.071573 |
| Cj1152 | 1 | 0.245252  | 0.799585  | 0.304511  | -0.382137 | 0.453017  | -0.474532 | -0.196277 | 0.548239  | -0.272123 | -0.064465 | 0.174534  |
| Cj1153 | 1 | 0.124196  | -0.014354 | -0.545192 | -0.092956 | -1.186722 | -0.104853 | 0.252537  | -1.196277 | 0.227371  | 0.129349  | -0.067183 |

|        |   |           |           |           |           |           |           |           |           |           |           |           |
|--------|---|-----------|-----------|-----------|-----------|-----------|-----------|-----------|-----------|-----------|-----------|-----------|
| Cj1154 | 1 | 0.164529  | 0.001442  | -0.445362 | -0.084211 | -0.805409 | -0.052446 | 0.294547  | -1.064314 | -0.002888 | 0.048097  | -0.132736 |
| Cj1155 | 1 | 0.029983  | 0.008774  | -0.386846 | 0.095047  | -0.707689 | -0.017125 | 0.234992  | -1.135745 | -0.019609 | -0.096807 | -0.306859 |
| Cj1156 | 1 | 0.190172  | 0.038436  | -0.354575 | 0.338453  | -0.952322 | 0.172231  | 0.142871  | -0.880179 | 0.209266  | 0.034779  | -0.04707  |
| Cj1157 | 1 | 0.097341  | -0.400492 | 0.026871  | -0.165693 | -0.198427 | -0.000433 | -0.074001 | -0.163429 | -0.133844 | -0.071118 | 0.135798  |
| Cj1158 | 1 | 0.082566  | -0.028116 | -0.104542 | -0.166989 | -2.194295 | -0.029735 | 0.020911  | -0.35089  | -1.649729 | -1.840629 | 0.111298  |
| Cj1159 | 1 | 0.19232   | 0.002306  | -0.072028 | -0.074001 | -1.471929 | 0.121546  | -0.006507 | -0.026205 | -1.114348 | -1.162299 | 0.031254  |
| Cj1160 | 1 | -0.003033 | 0.281431  | 0.37729   | 0.204391  | -0.728335 | -0.853084 | 0.367595  | -2.880445 | -1.959037 | 0.018349  |           |
| Cj1161 | 1 | 0.035483  | -0.051698 | -0.239907 | -0.471529 | -0.809701 | -0.050652 | -0.018147 | -0.887633 | -0.561068 | -0.723563 | -0.109981 |
| Cj1162 | 1 | 0.176706  | 0.006908  | -0.382137 | -0.271426 | -0.288241 | -0.107492 | 0.10286   | -0.511485 | -0.303116 | -0.201908 | 0.16954   |
| Cj1163 | 1 | 0.108223  | -0.105318 | 0.096532  | 0.100978  | 0.228357  | -0.107182 | -0.053194 | 0.1333    | -0.189516 | -0.059645 | 0.215865  |
| Cj1164 | 1 | 0.160146  | 0.400757  | 0.243182  | 0.246104  | 0.417164  | -0.005348 | -0.296368 | 0.289244  | 0.162597  | -0.088193 | 0.174662  |
| Cj1165 | 1 | 0.041243  | -0.027822 | -0.799872 | 0.208392  | -0.97568  | 0.135272  | 0.188907  | -1.316169 | 0.313246  | 0.166972  | -0.208728 |
| Cj1166 | 1 | 0.125916  | 0.023184  | -0.305253 | -0.052147 | -0.748311 | 0.141956  | 0.072312  | -0.541198 | -0.11076  | -0.274564 | 0.134878  |
| Cj1167 | 1 | 0.177089  | -0.135745 | 0.134615  | 0.105678  | 0.110764  | 0.114634  | 0.002739  | 0.365245  | 0.062536  | 0.034357  | -0.003611 |
| Cj1168 | 1 | 0.039419  | -0.024883 | 0.191184  | -0.143692 | -0.042457 | -0.237013 | -0.226341 | 0.42503   | -0.072028 | -0.529906 | -0.375384 |
| Cj1169 | 1 | -0.02327  | -0.047666 | -0.486408 | -0.099124 | -0.589008 | -0.101753 | -0.125951 | -0.604718 | -0.191986 | -0.062053 | 0.063641  |
| Cj1170 | 1 | -0.102063 | -0.032831 | -0.748311 | -0.661547 | -0.945916 | -0.404496 | -0.443595 | -0.971714 | -0.039488 | -0.878056 | -0.570679 |
| Cj1171 | 1 | -0.153126 | -0.026352 | -0.352363 | -0.199421 | -0.980796 | -0.008973 | -0.050054 | -0.684782 | -0.302404 | -0.323913 | -0.200747 |
| Cj1172 | 1 | -0.164723 | 0.348459  | 0.324811  | 0.478817  | 0.478817  |           | -1.381573 | 0.45133   | -0.820616 | -0.576906 | -0.264305 |
| Cj1173 | 1 | 0.021906  | -0.384584 | -0.233447 | -0.39138  | -0.386657 | -0.190174 | -0.292652 | -0.174784 | -0.473731 | -0.358084 | -0.321387 |
| Cj1174 | 1 | -0.001155 | -0.308645 | 0.053111  | -0.168933 | -0.051399 | -0.216585 | -0.144648 | 0.077243  | -0.378944 | -0.246224 | -0.106094 |
| Cj1175 | 1 | -0.051848 | -0.019755 | -0.363271 | 0.080794  | -0.75755  | 0.029983  | -0.029441 | -0.637334 | -0.108892 | -0.354206 | -0.204067 |
| Cj1176 | 1 | -0.003177 | 0.019915  | -0.020633 | 0.118227  | -0.091418 | -0.042903 | -0.240418 | 0.215119  | 0.136323  | 0.037312  | -0.134002 |
| Cj1177 | 1 | 0.07519   | 0.077516  | 0.042224  | 2.126742  | 0.467384  | 1.515712  |           | -0.018293 |           | 1.508429  | -0.215747 |
| Cj1178 | 1 | 0.102591  | 0.065434  | -0.870387 | -0.237013 | -0.599025 | 0.010923  | -0.039933 | -0.786124 | -0.057542 | 0.060739  | -0.16246  |
| Cj1179 | 1 | 0.108089  | -0.029588 | -0.16004  | -0.056791 | 0.011496  | -0.064163 | -0.065521 | -0.054093 | 0.076149  | -0.047219 | -0.099278 |
| Cj1180 | 1 | 0.071076  | 0.034497  | 0.166458  | 0.154065  | -0.083447 | 0.005903  | -0.215077 | 0.246712  | 0.307429  | 0.009634  | -0.336974 |
| Cj1181 | 1 | -0.19347  | -0.121549 | -0.191986 | -0.201908 | -0.316708 | -0.131629 | -0.37707  | -0.208728 | -0.043349 | -0.051848 | -0.349235 |
| Cj1182 | 1 | -0.005348 | -0.056341 | 0.08882   | -0.377444 | 0.22928   | -0.357345 | -0.224654 | 0.046701  | -0.248622 | -0.04707  | -0.102527 |
| Cj1183 | 1 | 0.107956  | 0.013355  | -0.574541 | -0.314194 | -1.317966 | -0.227185 | -0.132894 | -0.644984 | -0.19446  | -0.412731 | -0.068393 |
| Cj1184 | 1 | 0.154454  | 0.311503  | 0.036468  | -0.174296 | 0.063917  | -0.25515  | -0.133211 | 0.300885  | 0.148739  | -0.035195 | -0.26708  |
| Cj1185 | 1 | 0.061154  | -0.364571 | -0.097425 | -0.240248 | -0.093725 | -0.028852 | -0.147522 | -0.174459 | -0.236843 | -0.126896 | 0.036609  |
| Cj1186 | 1 | 0.057831  | -0.044985 | -0.200415 | -0.150721 | -0.311506 | -0.043943 | -0.001588 | -0.238204 | -0.320486 | -0.249136 | 0.003314  |
| Cj1187 | 1 | 0.17594   | -0.089267 | -0.231583 | -0.193635 | -0.591832 | -0.142576 | 0.052416  | -0.076432 | 0.058247  | -0.257045 | -0.22095  |
| Cj1188 | 1 | -0.107959 | 0.362105  | 0.335026  | -0.111072 | 0.349365  | -0.566186 | -0.38628  | 0.404031  | 0.025879  | -0.268643 | -0.088654 |

|        |   |           |           |           |           |           |           |           |           |           |           |           |
|--------|---|-----------|-----------|-----------|-----------|-----------|-----------|-----------|-----------|-----------|-----------|-----------|
| Cj1189 | 1 | -0.307573 | 0.302524  | -0.006217 | -0.219438 | 0.249385  | -0.111695 | -0.199918 | -0.104542 | -0.186722 | -0.278234 | 0.098958  |
| Cj1190 | 1 | 0.008774  | 0.292075  | -0.038154 | -0.108114 | -0.082072 | 0.062951  | -0.03549  | 0.041383  | -0.0836   | -0.286304 | 0.155102  |
| Cj1191 | 1 | 0.234379  | 0.608242  | 0.088006  | 0.274769  | 0.1595    | 0.021764  | 0.049491  | 0.464877  | 0.069977  | 0.085833  | 0.31371   |
| Cj1192 | 1 | 0.256648  | 0.079156  | -0.27631  | 0.281312  | -0.282614 | 0.217603  | 0.184471  | 0.176833  | 0.438399  | 0.172359  | 0.242816  |
| Cj1193 | 1 | 0.059771  | -0.003033 | -0.895663 | -0.03003  | -1.558942 | 0.205893  | -0.022683 | -1.200913 | 0.110497  | -0.140985 | -0.071421 |
| Cj1194 | 1 | -0.161169 | 0.245617  | -0.126108 | 0.149259  | -0.169582 | 0.151729  | 0.141171  | 0.115699  | 0.064193  | 0.09842   | 0.297485  |
| Cj1195 | 1 | 0.09329   | 0.245982  | -0.062053 | 0.099363  | 0.154713  | 0.015069  | -0.097579 | 0.29725   | -0.158107 | -0.108114 | 0.345056  |
| Cj1196 | 1 | 0.04977   | 0.537545  | 0.285698  | -0.148481 | 0.362442  | -0.029883 | -0.22651  | 0.454597  | 0.015212  | -0.01057  | 0.236462  |
| Cj1197 | 1 | -0.081614 | -0.195946 | -0.033274 | -0.079173 | 0.02432   | -0.157625 | -0.230059 | -0.127211 | -0.146403 | -0.031504 | -0.201079 |
| Cj1198 | 1 | -0.016395 | 0.029842  | 0.05894   | 0.125783  | 0.15562   | -0.021365 | 0.123799  | 0.14496   | 0.007052  | 0.111432  | 0.087463  |
| Cj1199 | 1 | 0.230818  | 0.207518  | 0.133564  | 0.093425  | 0.206518  | -0.01057  | 0.142087  | 0.198368  | 0.032665  | 0.245252  | 0.275245  |
| Cj1200 | 1 | 0.170951  | 0.153805  | 0.037593  | 0.233029  | 0.173511  | -0.079021 | 0.052277  | 0.399882  | 0.164143  | 0.117163  | 0.108357  |
| Cj1201 | 1 | -0.118884 | -0.21843  | -0.397068 | -0.470529 | -0.273866 | -0.466138 | -0.237524 | -0.228537 | -0.481364 | -0.035195 | -0.02283  |
| Cj1202 | 1 | 0.070664  | -0.017563 | -0.606254 | -0.100515 | -0.700169 | -0.057842 | 0.133958  | -0.652221 | -0.051549 | 0.02361   | -0.061902 |
| Cj1203 | 1 | 0.091531  | 0.065848  | -0.639804 | 0.045862  | -0.583593 | -0.033274 | 0.018777  | -0.805156 | -0.004479 | -0.007667 | 0.025879  |
| Cj1204 | 1 | 0.197488  | 0.055057  | -0.368104 | 0.203514  | -0.633076 | 0.219339  | -0.064314 | -0.695956 | 0.112367  | 0.151989  | -0.108114 |
| Cj1205 | 1 | -0.161653 | -0.072483 | -0.951485 | -0.218095 | -0.830332 | -0.334062 | 0.121944  | -1.07765  | -0.047965 | -0.024737 | -0.363828 |
| Cj1206 | 1 | -0.008682 | -0.049158 | -0.050054 | -0.184916 | -0.244343 | -0.136696 | -0.017563 | -0.10656  | -0.431092 | -0.215077 | 0.228726  |
| Cj1207 | 1 | 0.001154  | -0.079478 | -0.097116 | -0.000433 | -0.017855 | -0.051698 | -0.053643 | -0.002744 | -0.226341 | -0.007812 | 0.252173  |
| Cj1208 | 1 | 0.116232  | 0.315102  | -0.033127 | 0.324926  | 0.025596  | -0.02239  | -0.290004 | 0.245131  | 0.157561  | 0.140517  | 0.027579  |
| Cj1209 | 1 | -0.031061 | -0.403351 | 0.035765  | -0.398018 | -0.046772 | -0.089728 | 0.012497  | -0.217759 | -0.185901 | -0.094187 | 0.194717  |
| Cj1210 | 1 | -0.125478 | -0.255494 | 0.132379  | -0.689427 | -0.285952 | -0.332426 | -0.036674 | -0.016395 | -0.393274 | -0.104542 | 0.253384  |
| Cj1211 | 1 | 0.047818  | -0.059044 | -0.143373 | 0.023042  | -0.179351 | -0.074304 | -0.054392 | 0.085289  | -0.068544 | 0.186881  | 0.197991  |
| Cj1212 | 1 | 0.15782   | 0.075053  | -0.075064 | 0.249385  | -0.016833 | 0.167229  | -0.151042 | 0.15043   | 0.060739  | 0.153416  | 0.063917  |
| Cj1213 | 1 | 0.011639  | -0.047219 | -0.58814  | -0.331336 | -0.740818 | -0.038451 | -0.199752 | -0.550676 | -0.168123 | -0.077802 | -0.16004  |
| Cj1214 | 1 | 0.187514  | 0.002018  | -0.58554  | 0.189034  | -1.040378 | 0.244765  | 0.125783  | -0.859352 | 0.161436  | 0.148609  | -0.13005  |
| Cj1215 | 1 | 0.339365  | -0.018147 | 0.128425  | 0.284277  | 0.197362  | 0.325617  | 0.099363  | 0.349139  | 0.076559  | 0.06874   | 0.118626  |
| Cj1216 | 1 | 0.053945  | 0.025171  | 0.181039  | 0.152508  | 0.262193  | 0.070939  | -0.027087 | 0.48553   | 0.086784  | 0.064607  | -0.184097 |
| Cj1217 | 1 | 0.0297    | -0.47353  | -0.0613   | -0.297254 | -0.010425 | -0.101908 | 0.007052  | -0.094033 | -0.144648 | -0.079326 | -0.117631 |
| Cj1218 | 1 | -0.03697  | -0.391002 | -0.016833 | -0.590093 | 0.135929  | -0.466736 | -0.304541 | -0.021219 | -0.3655   | -0.184425 | -0.210396 |
| Cj1219 | 1 | 0.059355  | -0.249308 | 0.08134   | -0.298495 | 0.324235  | -0.366987 | -0.096345 | 0.175557  | -0.337521 | -0.085742 | -0.24366  |
| Cj1220 | 1 | 0.003314  | 0.16543   | 0.388686  | 0.271306  | 0.093425  | -0.067334 | -0.193305 | 0.441802  | 0.071763  | -0.036674 | 0.031819  |
| Cj1221 | 1 | -0.069149 | -0.401254 | 0.08692   | -0.026499 | 0.171719  | -0.307751 | -0.021219 | -0.100515 | -0.112943 | -0.004335 | 0.082021  |
| Cj1222 | 1 | 0.014927  | 0.058109  | 0.078883  | -0.176903 | 0.063089  | 0.097746  | 0.09356   | -0.069603 | -0.256528 | -0.097733 | -0.064314 |
| Cj1223 | 1 | 0.258217  | 0.016639  | 0         | 0.145221  | 0.091124  | 0.08352   | 0.135404  | 0.206768  | 0.101381  | 0.179893  | -0.02415  |

|        |   |           |           |           |           |           |           |           |           |           |           |           |
|--------|---|-----------|-----------|-----------|-----------|-----------|-----------|-----------|-----------|-----------|-----------|-----------|
| Cj1224 | 1 | 0.312665  | 0.343806  | 0.198243  | 0.201383  | 0.468427  | 0.084064  | -0.207228 | 0.532367  | 0.138945  | 0.220825  | -0.206229 |
| Cj1225 | 1 | 0.090718  | -0.113255 | 0.128821  | -0.235994 | 0.171079  | -0.006362 | -0.177882 | -0.088807 | -0.447918 | -0.202738 | -0.106871 |
| Cj1226 | 1 | 0.040963  | 0.008343  | -0.326263 | -0.172506 | -0.433818 | 0.126312  | 0.020627  | -0.5391   | -0.274215 | -0.168447 | -0.130681 |
| Cj1227 | 1 | 0.07861   | -0.021072 | 0.154324  | -0.107648 | 0.081067  | -0.112007 | -0.01057  | 0.117163  | -0.204399 | -0.179841 | -0.085282 |
| Cj1228 | 1 | 0.207393  | 0.105142  | 0.193835  | 0.00101   | 0.331017  | 0.065434  | -0.108425 | 0.393416  | 0.209017  | 0.055473  | -0.094649 |
| Cj1229 | 1 | -0.074608 | 0.03984   | -0.128787 | -0.202572 | -0.215412 | -0.001299 | -0.101598 | -0.236843 | -0.182622 | -0.096345 | -0.177229 |
| Cj1230 | 1 | -0.061902 | -0.236164 | 0.310805  | 0.957395  | 0.391108  | -0.529281 | -0.104232 | 0.143132  | -0.774232 | -0.008537 | 0.038296  |
| Cj1231 | 1 | 0.075738  | 0.061569  | -0.253257 | 0.128161  | -0.264998 | -0.039044 | 0.153027  | -0.078716 | 0.095182  | 0.108089  | -0.29885  |
| Cj1232 | 1 | 0.025454  | 0.076969  | 0.289952  | 0.075738  | 0.261591  | -0.040378 | -0.239566 | 0.398788  | 0.23131   | 0.072449  | -0.377632 |
| Cj1233 | 1 | 0.028852  | -0.390812 | -0.012606 | -0.137965 | 0.031819  | -0.040675 | -0.139236 | -0.112319 | -0.056791 | -0.063861 | -0.357345 |
| Cj1234 | 1 | -0.028263 | -0.006942 | -0.137648 | 0.146525  | -0.166017 | 0.282143  | 0.182311  | -0.072786 | -0.160363 | 0.086104  | -0.358639 |
| Cj1235 | 1 | -0.190174 | -0.006362 | -0.600993 | -0.0432   | -0.821636 | 0.043904  | 0.181802  | -0.512719 | 0.162081  | 0.119024  | -0.475334 |
| Cj1236 | 1 | -0.14401  | 0.079975  | 0.22231   | -0.08896  | 0.124725  | 0.006047  | 0.045862  | 0.407842  | 0.306262  | 0.151079  | -0.441243 |
| Cj1237 | 1 | -0.026205 | 0.315798  | 0.046701  | -0.531782 | 0.196103  | -0.04886  | -0.261189 | -0.056791 | -0.243318 | -0.229213 | -0.177066 |
| Cj1238 | 1 | -0.398779 | -0.054542 | 0         | -0.001877 | -0.13416  | -0.042903 | 0.042224  | 0.047538  | -0.030177 | 0.053945  | -0.003611 |
| Cj1239 | 1 | -0.069603 | 0.05325   | -0.085895 | 0.079156  | -0.034751 | 0.00173   | 0.16877   | 0.122209  | -0.078107 | -0.078411 | 0.115699  |
| Cj1240 | 1 | -0.158268 | 0.033934  | 0.079702  | 0.019061  | 0.174023  | 0.095452  | 0.028286  | 0.318577  | 0.012068  | -0.00231  | 0.03984   |
| Cj1241 | 1 | -0.421786 | -0.235824 | -0.06673  | -0.113099 | -0.073393 | 0.064331  | 0.037593  | -0.147522 | -0.158107 | -0.234296 | -0.157625 |
| Cj1242 | 1 | -0.310075 | -0.045878 | -0.787866 | -0.120451 | -1.126896 | 0.079156  | 0.05894   | -0.963532 | -0.005638 | -0.02415  | -0.190339 |
| Cj1243 | 1 | 0.079293  | 0.049491  | -0.104853 | -0.04558  | 0.064469  | -0.304362 | -0.137807 | 0.02361   | 0.081612  | 0.035765  | -0.085895 |
| Cj1244 | 1 | 0.095047  | 0.653427  | 0.301705  | -0.029883 | 0.397803  | 0.038717  | -0.120451 | 0.459851  | 0.223917  | 0.148999  | -0.1882   |
| Cj1245 | 1 | -0.065068 | 0.004322  | -0.172181 | -0.042605 | -0.189845 | 0.097206  | 0.057554  | -0.130523 | 0.009634  | -0.081766 | -0.28437  |
| Cj1246 | 1 | -0.322108 | 0.013927  | -0.507993 | 0.094777  | -0.888434 | 0.098285  | 0.365805  | -0.431676 | 0.057277  | 0.047678  | -0.345748 |
| Cj1247 | 1 | 0.002162  | 0.091937  | 0.074094  | 0.130536  | 0.180148  | 0.002018  | 0.047538  | 0.255803  | 0.07519   | 0.073409  | 0.320773  |
| Cj1248 | 1 | -0.052745 | 0.001442  | -0.041714 | 0.146786  | -0.103612 | 0.040822  | 0.079839  | 0.262193  | 0.229957  | 0.111298  | -0.22989  |
| Cj1249 | 1 | 0.096262  | 0.02219   | -0.465938 | -0.200415 | -0.400873 | 0.032524  | 0.039279  | -0.786124 | 0.10916   | 0.019631  | -0.12658  |
| Cj1250 | 1 | -0.090342 | 0.002162  | -0.455811 | -0.023416 | -0.793357 | 0.02219   | 0.194844  | -1.004335 | -0.012897 | 0.012354  | -0.318686 |
| Cj1251 | 1 | 0.018634  | 0.014927  | -0.32572  | 0.206518  | -0.664974 | -0.018147 | 0.165301  | -0.5041   | 0.109962  | 0.128689  | -0.149441 |
| Cj1252 | 1 | 0.228111  | 0.048376  | -0.166341 | 0.41792   | -0.347032 | 0.244278  | 0.011639  | -0.17511  | 0.257735  | 0.153935  | -0.065823 |
| Cj1253 | 1 | 0.020627  | -0.082225 | 0.076969  | -0.426044 | 0.405339  | -0.204898 | -0.179188 | 0.00863   | -0.041714 | -0.225835 | -0.077345 |
| Cj1254 | 1 | 0.014927  | -0.098969 | -0.011152 | -0.246395 | -0.02327  | -0.185737 | -0.077193 | -0.040082 | -0.152805 | -0.287536 | 0.063365  |
| Cj1255 | 1 | 0.089363  | -0.017271 | -0.376508 | -0.288241 | -0.036378 | -0.423913 | -0.580785 | -0.02327  | -0.091571 | -0.760235 | -0.393842 |
| Cj1256 | 1 | 0.132774  | -0.012461 | -0.367918 | 0.032947  | -0.393842 | -0.076432 | -0.587273 | -0.103922 | 0.113167  | -0.188693 | -0.30793  |
| Cj1257 | 1 | 0.021622  | -0.285249 | 0.109427  | -0.345564 | 0.023184  | -0.084058 | -0.126738 | -0.215077 | -0.029883 | -0.416192 | 0.01564   |
| Cj1258 | 1 | 0.070801  | 0.020342  | -0.125321 | 0.030972  | -0.189351 | 0.072586  | 0.197614  | -0.221455 | 0.22033   | 0.061984  | 0.099901  |

|        |   |           |           |           |           |           |           |           |           |           |           |           |
|--------|---|-----------|-----------|-----------|-----------|-----------|-----------|-----------|-----------|-----------|-----------|-----------|
| Cj1259 | 1 | 0.079293  | -0.1882   | 0.239276  | -1.193305 | 0.142217  | -1.112787 | -0.019317 | 0.156008  | -0.389489 | -0.168447 | 0.062812  |
| Cj1260 | 1 | 0.1153    | 0.411318  | 0.056722  | 0.040682  | 0.381062  | -0.07552  | -0.084211 | 0.272023  | 0.059494  | -0.063258 | 0.132643  |
| Cj1261 | 1 | 0.121015  | -0.029735 | -0.68177  | -0.12422  | -0.720232 | 0.087327  | 0.051859  | -0.512925 | 0.130404  | 0.282618  | -0.065068 |
| Cj1262 | 1 | 0.204516  | -0.043051 | -0.178371 | 0.092207  | -0.332426 | 0.130008  | 0.178619  | -0.22989  | 0.193583  | 0.191184  | -0.07127  |
| Cj1263 | 1 | 0.217107  | 0.035342  | -0.090342 | 0.167486  | -0.038451 | 0.1145    | 0.233643  | 0.141171  | 0.136716  | -0.062957 | 0.044324  |
| Cj1264 | 1 | -0.006942 | 0.275841  | 0.384271  | 0.142479  | 0.377512  | 0.054084  | -0.09866  | 0.480679  | 0.135404  | -0.30276  | 0.00619   |
| Cj1265 | 1 | -0.107492 | -0.467932 | 0.101919  | -0.30561  | 0.08692   | -0.201576 | -0.161008 | -0.04023  | -0.288241 | -0.351811 | 0.083247  |
| Cj1266 | 1 | -0.042011 | -0.238885 | 0.278817  | 0.133169  | 0.340505  | -0.289475 | -0.011588 | 0.121281  | -0.145127 | -0.163106 | 0.116897  |
| Cj1267 | 1 | 0.145351  | -0.274041 | 0.312433  | 0.236095  | 0.300885  | -0.326263 | -0.084058 | 0.161952  | -0.722848 | 0.239154  | 0.091124  |
| Cj1268 | 1 | -0.107959 | 0.038717  | 0.297485  | 0.160146  | 0.34551   | -0.11076  | -0.21073  | 0.413919  | -0.037858 | -0.140348 | -0.055142 |
| Cj1269 | 1 | 0.09004   | -0.300448 | -0.009263 | -0.215915 | 0.061016  | -0.032094 | -0.050801 | -0.117474 | -0.145127 | -0.092802 | -0.043497 |
| Cj1270 | 1 | 0.074505  | -0.141621 | 0.34551   | -3.803897 | 0.366476  | -0.897812 | -0.402016 | 0.069565  | -0.62171  | -0.131155 | 0.105276  |
| Cj1271 | 1 | 0.05464   | -0.209895 | 0.103934  | -0.113567 | 0.326192  | -0.069452 | -0.123277 | 0.361432  | -0.213236 | -0.082836 | 0.018919  |
| Cj1272 | 1 | 0.058663  | 0.30871   | 0.328147  | -0.072786 | 0.399663  | 0.022332  | -0.320846 | 0.46634   | 0.00245   | 0.040402  | -0.076889 |
| Cj1273 | 1 | -0.079173 | -0.003177 | -0.137807 | -0.133052 | -0.20307  | -0.111539 | -0.13733  | -0.253429 | -0.195781 | -0.078868 | -0.184261 |
| Cj1274 | 1 | -0.012461 | -0.104077 | 0.047399  | 0.002739  | 0.081612  | -0.045134 | -0.130365 | 0.025738  | -0.249136 | -0.114348 | -0.020048 |
| Cj1275 | 1 | 0.179001  | 0.093425  | 0.188907  | 0.050745  | 0.327802  | 0.10017   | -0.077345 | 0.26111   | -0.018147 | 0.213254  | -0.077498 |
| Cj1276 | 1 | 0.141956  | 0.623305  | 0.420078  | -0.077954 | 0.544584  | 0.077516  | -0.197269 | 0.449957  | 0.220578  | 0.206893  | -0.001443 |
| Cj1277 | 1 | 0.042224  | -0.151362 | 0.187641  | -0.883369 | 0.168129  | -0.183933 | -0.16537  | 0.154065  | -0.266038 | 0.002739  | -0.133685 |
| Cj1278 | 1 | -0.184752 | 0.03337   | -0.145127 | -0.204732 | -0.526161 | -0.245027 | -0.127999 | -0.167637 | -0.239226 | 0.031677  | -0.074608 |
| Cj1279 | 1 | -0.372393 | 0.009347  | -0.056491 | 0.009634  | -0.257735 | -0.107648 | -0.072028 | -0.152644 | -0.150401 | -0.077041 | -0.028558 |
| Cj1280 | 1 | 0.068327  | 0.135666  | 0.268913  | 0.290306  | 0.361993  | 0.077106  | -0.072483 | 0.581496  | 0.136454  | 0.017779  | -0.192645 |
| Cj1281 | 1 | 0.14496   | -0.128314 | 0.058663  | -0.094803 | 0.194591  | -0.032684 | -0.195286 | 0.010064  | -0.219438 | -0.055891 | -0.19347  |
| Cj1282 | 1 | 0.117961  | 0         | -0.030472 | -0.006797 | -0.063108 | 0.131985  | 0.133958  | -0.027381 | 0.034779  | 0.109294  | -0.025764 |
| Cj1283 | 1 | -0.037562 | 0.086512  | 0.285816  | -0.025177 | 0.373509  | -0.452451 | -0.017855 | 0.310689  | 0.104202  | 0.088006  | -0.012024 |
| Cj1284 | 1 | 0.076149  | 0.478092  | 0.310922  | 0.240864  | 0.457542  | 0.095047  | 0.014498  | 0.505484  | 0.166458  | 0.127501  | -0.06809  |
| Cj1285 | 1 | 0.104337  | 0.365805  | 0.038155  | -0.374823 | 0.331132  | -0.015958 | -0.328254 | -0.076737 | -0.073697 | 0.01407   | 0.171463  |
| Cj1286 | 1 | -0.070663 | 0.010493  | -0.239736 | 0.14978   | -0.200415 | 0.148609  | 0.058524  | 0.019915  | 0.126973  | 0.118493  | 0.252173  |
| Cj1287 | 1 | 0.156397  | 0.009491  | -0.404878 | 0.170951  | -0.589008 | -0.035638 | -0.00231  | -0.340441 | 0.135009  | 0.081885  | -0.406025 |
| Cj1288 | 1 | 0.133695  | 0.013069  | -0.10656  | -0.060096 | 0.08352   | -0.028852 | -0.156177 | 0.250719  | 0.131194  | 0.051581  | -0.073697 |
| Cj1289 | 1 | 0.026729  | 0.023894  | -0.018147 | -0.172506 | -0.039785 | 0.018064  | -0.123434 | -0.135745 | 0.004178  | 0.006765  | -0.381761 |
| Cj1290 | 1 | -0.210563 | 0.013498  | -0.558942 | -0.124849 | -0.591614 | 0.113167  | 0.085289  | -0.32283  | -0.100824 | -0.131155 | -0.036674 |
| Cj1291 | 1 | 0.009347  | 0.132116  | 0.170566  | 0.129876  | 0.152897  | 0.041523  | 0.095047  | 0.363451  | 0.019204  | 0.143655  | 0.117163  |
| Cj1292 | 1 | 0.044884  | 0.035905  | -0.064616 | 0.178109  | 0.087327  | 0.0397    | 0.127501  | 0.327802  | 0.234011  | 0.019346  | -0.0836   |
| Cj1293 | 1 | -0.000577 | -0.322108 | -0.023856 | -0.186229 | 0.023184  | 0.187641  | -0.04558  | -0.109203 | 0.026729  | -0.064314 | -0.287184 |

|        |   |           |           |           |           |           |           |           |           |           |           |           |
|--------|---|-----------|-----------|-----------|-----------|-----------|-----------|-----------|-----------|-----------|-----------|-----------|
| Cj1294 | 1 | -0.332971 | -0.015958 | -0.246567 | -0.057392 | -0.035638 | -0.137965 | 0.173255  | -0.078107 | -0.169258 | -0.117787 | 0.128425  |
| Cj1295 | 1 | -0.25257  | 0.236707  | 0.245861  | 0.369494  | 0.480886  | -0.413499 | 0.138421  | 0.399007  | 0.275603  | 0.095857  | 0.379843  |
| Cj1296 | 1 | -0.904548 | 0.629473  | 0.282025  | -1.5391   | 0.504366  | -0.574756 | -0.348317 | 0.508733  | -0.260152 | -0.394032 | 0.342555  |
| Cj1297 | 1 | -1.908334 | -0.936221 | -0.238204 | -0.338433 | -0.428566 | -0.015666 | -1.674844 | -0.700169 | -0.131471 | -0.294597 | -0.147681 |
| Cj1298 | 1 | -1.879914 | -1.774972 | 0.040261  | -0.098506 | -0.100051 | 0.100439  | -1.260843 | -0.031946 | -0.160847 | -0.310611 | 0.141171  |
| Cj1299 | 1 | -2.37632  | -1.882039 | -0.014208 | 0.065986  | 0.331476  | -0.005493 | -1.445755 | 0.174151  | -0.03697  | 0.137504  | 0.09329   |
| Cj1300 | 1 | -2.158429 | -0.129576 | -0.450873 | 0.449112  | -0.574756 | 0.324004  | -1.37932  | -0.332244 | 0.316493  | 0.292193  | -0.271426 |
| Cj1301 | 1 | -2.675765 | -1.366987 | -0.104077 | -0.302048 | -0.172994 | 0.032101  | -1.366615 | -0.188365 | -0.120608 | -0.171856 | 0.219711  |
| Cj1302 | 1 | -3.112787 | -0.012024 | -0.330973 | 0.044044  | -0.18295  | 0.07286   | 0.115433  | -0.178861 | 0.063779  | 0.173255  | 0.126709  |
| Cj1303 | 1 | -3.307573 | -0.215077 | -0.013334 | 0.25882   | 0.093019  | 0.151989  | -0.142099 | 0.115033  | 0.082158  | 0.114367  | 0.328836  |
| Cj1304 | 1 | -2.511279 | -0.027675 | -0.261535 | 0.330903  | -0.202406 | 0.226015  | -0.463549 | 0.188907  | 0.035483  | 0.080112  | -0.085435 |
| Cj1305 | 1 | -1.361046 | -0.012024 | -0.593354 | -0.337339 | -0.231244 | 0.264476  | -0.253085 | -0.522012 | -0.054842 | -0.033422 | 0.074505  |
| Cj1306 | 1 | -1.542038 | -0.005348 | -0.347399 | -0.496957 | -0.012752 | 0.291014  | 0.267116  | -0.262919 | 0.046421  | 0.125783  | 0.076696  |
| Cj1307 | 1 | -0.384584 | -0.234126 | -0.072938 | 0.189287  | 0.104739  | 0.116099  | 0.242328  | 0.1153    | -0.024296 | 0.04991   | 0.140648  |
| Cj1308 | 1 | -0.729531 | 0.026729  | 0.265317  | 0.229219  | 0.438186  | 0.306496  | -0.192151 | 0.385155  | 0.100036  | 0.115033  | 0.03956   |
| Cj1309 | 1 | -1.595969 | -1.463549 | -0.07628  | -0.06356  | 0.055196  | 0.210638  | 0.010923  | -0.125006 | -0.120922 | -0.005493 | 0.142087  |
| Cj1310 | 1 | -0.850741 | -0.25068  | -0.009263 | 0.041383  | 0.036609  | 0.336169  | 0.102188  | 0.069565  | -0.154249 | -0.144329 | 0.088142  |
| Cj1311 | 1 | -0.096962 | -0.026352 | -0.228537 | 0.266037  | -0.119197 | 0.169412  | 0.169669  | -0.059946 | 0.100305  | 0.131589  | -0.322289 |
| Cj1312 | 1 | -0.285249 | -0.012897 | -0.290709 | 0.333195  | -0.352547 | 0.31034   | -0.007522 | -0.146403 | 0.380286  | 0.106884  | -0.312581 |
| Cj1313 | 1 | -0.288241 | -0.031061 | -0.249651 | -0.240418 | -0.192151 | 0.128161  | 0.059771  | -0.364756 | -0.300448 | -0.165208 | -0.151202 |
| Cj1314 | 1 | -0.094033 | -0.312223 | 0.177089  | -0.204067 | 0.125783  | -0.232769 | -0.120765 | 0.03196   | -0.660406 | -0.46953  | -0.165046 |
| Cj1315 | 1 | -0.007232 | -0.184916 | 0.28948   | -0.105939 | 0.444137  | -0.206728 | -0.044538 | 0.233643  | -0.437721 | -0.155213 | 0.042784  |
| Cj1316 | 1 | -0.120137 | 0.222063  | 0.299948  | 0.084609  | 0.324811  | -0.075824 | -0.352916 | 0.544881  | -0.124849 | -0.131787 | -0.141621 |
| Cj1317 | 1 | -0.532616 | -0.246053 | 0.002306  | -0.331518 | -0.504509 | -0.16537  | -0.303472 | -0.091725 | -0.094957 | -0.058593 | -0.419469 |
| Cj1318 | 1 | -1.369222 | -0.434208 | 0.221197  | -1.577767 | 0.502229  | -1.913216 | -1.045134 | 0.16092   | 0.614474  | -0.146723 | -0.396119 |
| Cj1319 | 1 | -2.626825 | -2.544561 | 0.20063   | 0.016639  | -0.082683 | -0.228368 | -0.108892 | 0.21313   | -0.175436 | -0.085742 | -0.199752 |
| Cj1320 | 1 | -3.521183 | -2.148161 | 0.187388  | 0.042084  | 0.128953  | -0.238374 | -0.39517  | 0.500394  | -0.060397 | -0.23243  | -0.17511  |
| Cj1321 | 1 | -2.909418 | -2.07765  | 0.005184  | 1.157432  | 0.207143  | -1.046325 | -0.730009 | -0.120451 | 1.309176  | 2.788811  | -0.130208 |
| Cj1322 | 1 | -4.132894 | -1.979373 | -0.772998 | 0.2444    | -0.909418 | 0.21176   | 0.316957  | -1.167799 | 0.224411  | 0.088956  | -0.370527 |
| Cj1323 | 1 | -0.766603 | -0.670245 | 0.156655  | -0.013625 | 0.34426   | -0.120765 | -0.124692 | 0.271306  | -0.071118 | 0.051163  | -0.032241 |
| Cj1324 | 1 | -3.886833 | -1.547088 | -0.077498 | 0.019773  | -0.240077 | 0.053111  | 0.067363  | 0.061431  | 0.125651  | -0.143851 | -0.312402 |
| Cj1325 | 1 | -1.085895 | 0.00101   | -0.451859 | 0.056445  | -0.52533  | 0.154065  | 0.231064  | -0.602526 | 0.082566  | -0.030472 | -0.565332 |
| Cj1326 | 1 | -3.546245 | -1.883103 | 0.074916  | 0.252537  | 0.188907  | -0.377632 | -0.236164 | 0.104739  | -0.851521 | -0.096807 | -0.446541 |
| Cj1327 | 1 | -3.766112 | -2.234465 | 0.303576  | -0.062204 | 0.393636  | -0.0432   | -0.017417 | 0.31603   | 0.060047  | -0.024003 | -0.270904 |
| Cj1328 | 1 | -4.576906 | -2.402016 | -0.082225 | 0.228973  | -0.187214 | -0.082683 | 0.026588  | 0.064745  | 0.1644    | 0.006478  | -0.375946 |

|        |   |           |           |           |           |           |           |           |           |           |           |           |
|--------|---|-----------|-----------|-----------|-----------|-----------|-----------|-----------|-----------|-----------|-----------|-----------|
| Cj1329 | 1 | -1.880976 | -0.528865 | -0.517048 | -0.054242 | -0.521598 | 0.240131  | 0.084473  | -0.413115 | 0.067363  | 0.093425  | -0.398589 |
| Cj1330 | 1 | -3.627716 | -1.928512 | -0.412731 | -0.061752 | -1.178861 | -0.450479 | 0.211884  | -0.85726  | 0.070115  | 0.18409   | -0.562133 |
| Cj1331 | 1 | -2.412731 | -0.616171 | -0.394221 | 0.036327  | -1.183114 | 0.011782  | 0.228849  | -0.729053 | 0.264596  | 0.1153    | -0.492687 |
| Cj1332 | 1 | -1.877791 | -1.442222 | 0.412077  | -0.176577 | 0.357383  | -0.146403 | -0.237694 | 0.424707  | 0.188401  | -0.051399 | -0.557667 |
| Cj1333 | 1 | -1.470729 | -1.369222 | -0.027087 | -0.824699 | 0.016639  | -0.453834 | -0.011879 | -0.060849 | 0.027296  | 0.068602  | -1.094803 |
| Cj1334 | 1 | -1.118414 | -0.149761 | -0.607793 | 0.227125  | -1.083447 | 0.354903  | 0.406319  | -0.992804 | 0.432746  | 0.366588  | -0.320666 |
| Cj1335 | 1 | -1.115597 | -0.753409 | 0.005616  | -0.053943 | 0.01035   | 0.119954  | 0.010207  | 0.258941  | 0.041103  | 0.10165   | -0.081156 |
| Cj1336 | 1 | -0.84451  | -0.087427 | -0.439285 | 0.035624  | -0.962688 | -0.080088 | 0.278223  | -1.077041 | 0.366812  | 0.323197  | -0.631064 |
| Cj1337 | 1 | -1.594225 | -1.101908 | -0.310611 | -0.067183 | -0.32265  | 0.22033   | 0.108759  | -0.229213 | 0.001154  | -0.176251 | -0.361973 |
| Cj1338 | 1 | -0.919479 | -0.747827 | 0.145612  | 0.0842    | 0.135929  | 0.357946  | 0.055057  | 0.145612  | 0.010637  | -0.016395 | 0.155749  |
| Cj1339 | 1 | -0.615287 | -0.083141 | 0.273456  | 0.04977   | 0.35061   | -0.018586 | -0.021658 | 0.31603   | -0.109981 | -0.140189 | -0.098815 |
| Cj1340 | 1 | -1.179515 | -0.057692 | 0.160791  | 0.045024  | 0.136716  | 0.061707  | 0.040402  | 0.355693  | 0.443501  | 0.177599  | -0.275786 |
| Cj1341 | 1 | -1.410812 | -0.581864 | -0.435573 | -0.043943 | -0.950369 | 0.191184  | -0.106094 | -0.442222 | 0.109695  | -0.06537  | -0.254978 |
| Cj1342 | 1 | -0.275088 | -0.230905 | -0.179351 | -0.381949 | -0.647693 | 0.104202  | 0.233765  | -0.073697 | 0.125651  | 0.134747  | -0.522012 |
| Cj1343 | 1 | -0.021658 | 0.173255  | 0.106482  | -0.223643 | 0.511367  | -0.286656 | 0.016782  | 0.372506  | -0.042308 | -0.037414 | -0.144329 |
| Cj1344 | 1 | 0.191815  | 0.282973  | 0.11929   | 0.054779  | 0.016924  | -0.067334 | -0.101908 | 0.458697  | 0.03689   | -0.153767 | 0.193835  |
| Cj1345 | 1 | 0.139208  | -0.094033 | -0.180495 | -0.108114 | -0.621266 | -0.058743 | 0.070252  | -0.285249 | 0.032665  | -0.030472 | 0.180657  |
| Cj1346 | 1 | 0.123534  | -0.050801 | 0.195096  | -1.593354 | 0.257493  | -0.366987 | 0.007052  | 0.007339  | -0.882039 | -0.323011 | 0.089227  |
| Cj1347 | 1 | 0.353097  | 0.293724  | 0.141825  | 0.981487  | 0.447209  | 2.584073  | 1.264837  | 0.185105  | 1.941444  | -0.089114 | -0.05125  |
| Cj1348 | 1 | 0.104202  | 0.364684  | 0.325271  | 0.018777  | 0.482332  | -0.091879 | -0.287008 | 0.355693  | 0.345964  | 0.113434  | 0.096936  |
| Cj1349 | 1 | -0.146883 | -0.078411 | -0.008537 | 2.292929  | 0.318693  | -0.487824 | -0.263612 | -0.001155 | -0.204233 | -0.229721 | 0.142871  |
| Cj1350 | 1 | 0.283566  | 0.183074  | 0.115033  | 1.044884  | 0.240986  | -0.194625 | 0.001586  | 0.045583  | -0.764886 | -0.08896  | 0.108759  |
| Cj1351 | 1 | 0.264837  | 0.498149  | 0.158854  | 1.052694  | 0.495491  | -1.932361 | -0.077498 | 0.138159  | 0.207643  | 0.345396  |           |
| Cj1352 | 1 | 0.092749  | 0.665757  | 0.17645   | 0.299596  | 0.35558   | 0.00619   | -0.39935  | 0.221197  | 0.225522  | 0.181039  | 0.098015  |
| Cj1353 | 1 | 0.042504  | -0.327167 | 0.053667  | -0.106249 | 0.105142  | -0.216921 | -0.065672 | -0.08467  | -0.06537  | -0.023416 | 0.236095  |
| Cj1354 | 1 | 0.136323  | 0.196481  | 0.156655  |           | 0.249385  |           |           | 0.041383  |           |           | 0.003746  |
| Cj1355 | 1 | 0.231801  | 0.245009  | 0.270589  | 1.786262  | 0.497127  | -0.180332 | 0.480058  | 0.152897  | -1.508814 | -0.096036 | 0.360308  |
| Cj1356 | 1 | -0.200084 | 1.166651  | 0.168642  | -1.415037 | 0.496002  |           | -0.251024 | 2.279412  | 3.369103  | 1.092004  | 1.673602  |
| Cj1357 | 1 | 0.073957  | -0.171693 | 0.137241  |           | 0.355242  | -0.323733 | -0.658811 | 0.08243   |           | -1.25877  | 0.399663  |
| Cj1358 | 1 | 0.253626  | -0.04558  | 0.196985  | -1.004914 | 0.253747  | -8.20025  | -0.40679  | 0.095047  | -13.28771 | 0.009777  | 0.463204  |
| Cj1359 | 1 | -0.458783 | 0.128161  | 0.315682  | -0.063409 | 0.419323  |           |           | 0.242206  |           |           | 0.324926  |
| Cj1360 | 1 | 0.124328  | 0.95509   | 0.289598  |           | 0.51541   |           | -0.244685 | 0.483674  |           | 0.466444  | 1.35834   |
| Cj1361 | 1 | 0.419215  | -0.24127  | 0.095587  | -1.108114 | 0.219587  | -0.190503 | 0.253384  | -0.060548 | 0.45249   | -0.168933 | 0.223917  |
| Cj1362 | 1 | 0.168129  | 0.005041  | -0.577336 | 0.365916  | -0.918933 | 0.259423  | 0.525067  | -0.98965  | 0.541713  | 0.374177  | -0.559154 |
| Cj1363 | 1 | 0.024745  | 0.376513  | 0.752149  | -0.073393 | 0.455649  |           | 1.5034    | 0.338225  | 0.757791  | 0.660746  | -0.159718 |





|        |   |           |           |           |           |           |           |           |           |           |           |           |
|--------|---|-----------|-----------|-----------|-----------|-----------|-----------|-----------|-----------|-----------|-----------|-----------|
| Cj1399 | 1 | 0.011496  | -0.047965 | 0.054223  | -0.062204 | 0.048794  | -0.034604 | -0.091571 | 0.071763  | -0.325539 | -0.352363 | -0.12422  |
| Cj1400 | 1 | 0.055335  | 0.783247  | 0.296428  | -0.418311 | 0.390888  | -0.239566 | -0.618606 | 0.300885  | 0.005903  | -0.204233 | -0.081614 |
| Cj1401 | 1 | -0.031504 | -0.285073 | 0.035202  | -0.248279 | 0.415975  | -4.049308 | -0.176577 | -0.057992 | 0.104739  | -0.484187 | 0.168899  |
| Cj1402 | 1 | -0.409278 | -0.094957 | -0.173807 | -0.028852 | -0.093725 | -0.520562 | -0.043646 | -0.199909 | 0.081749  | 0.070252  | 0.104202  |
| Cj1403 | 1 | 0.00863   | -0.12312  | -0.349419 | -0.065974 | -0.600118 | -0.142895 | -0.064465 | -0.432649 | -0.130365 | 0.042224  | 0.14091   |
| Cj1404 | 1 | 1.369494  | 0.684908  | 0.272382  | -1.087427 | 0.451963  | -0.426432 | -0.096499 | 0.326997  | -1.602088 | 0.047818  | -0.172994 |
| Cj1405 | 1 | 0.010493  | -0.426625 | 0.099093  | 0.08692   | 0.408929  | -0.446148 | -0.22803  | -0.056191 | -0.592049 | -0.255667 | -0.178535 |
| Cj1406 | 1 | 0.186881  | -0.034308 | 0.262674  | 0.922655  | 0.345737  |           | -0.239566 | 0.062674  | -1.098197 | -0.906169 | 0.359521  |
| Cj1407 | 1 | 0.100439  | -0.116066 | -0.004479 | -0.403924 | 0.269273  | 0.061292  | -0.172831 | 0.156138  | -0.719519 | -0.462754 | -0.310075 |
| Cj1408 | 1 | 0.173511  | 0.532367  | 0.242572  | 2.848618  | 0.415326  | 0.494876  | -3.163591 | 0.504976  |           | -0.235484 | -0.018586 |
| Cj1409 | 1 | -0.050951 | -0.475736 | -0.176903 | -0.412347 | 0.031113  | -0.061601 | -0.060397 | -0.161653 | -0.565545 | -0.40679  | -0.078716 |
| Cj1410 | 1 | -0.084823 | -0.271252 | 0.233765  | -0.912673 | 0.391438  | -0.62171  | -0.299028 | 0.082703  | -0.808437 | -0.819343 | 0.051163  |
| Cj1411 | 1 | -0.026205 | 0.241718  | 0.1133    | 0.96643   | 0.476952  | 0.37829   | 1.489492  | 0.265197  | 1.571725  | 1.916324  | 0.396269  |
| Cj1412 | 1 | 0.174662  | 0.463727  | 0.347325  | -0.215915 | 0.588709  | -0.35679  | -0.529489 | 0.380397  | -0.1386   | -0.166341 | 0.721941  |
| Cj1413 | 1 | 0.08882   | -0.211064 | 0.168899  | 0.714751  | 0.407625  | 3.577248  | -0.520769 | -0.101598 | 2.769602  |           | 0.25544   |
| Cj1414 | 1 | 0.043345  | -0.026793 | 0.177471  | -0.323552 | 0.086648  | -0.059044 | -0.175925 | 0.015783  | -0.133211 | -0.024003 | -0.10827  |
| Cj1415 | 1 | -0.975113 | 0.270469  | 0.209765  |           | 0.722116  | -3.22297  |           | 0.351854  | 0.180784  | -0.276485 |           |
| Cj1416 | 1 | -0.414268 | 0.113434  | 0.35558   | 0.101112  | 0.093019  | 0.013355  | -0.306859 | 0.432104  | -0.151683 | -0.252226 | -0.27439  |
| Cj1417 | 1 | -0.328254 | -0.084058 | -0.145765 | -0.208728 | -0.030914 | -0.015083 | -0.180495 | -0.164723 | -0.233786 | -0.296545 | -0.314015 |
| Cj1418 | 1 | 0.086512  | -0.033127 | -0.112943 | 0.018064  | 0.024036  | 0.099093  | 0.129613  | 0.016354  | -0.125636 | -0.165855 | -0.023123 |
| Cj1419 | 1 | -0.009699 | -0.015083 | 0.079702  | 0.075738  | 0.257735  | 0.030265  | -0.110449 | 0.178747  | 0.030407  | 0.091666  | -0.082988 |
| Cj1420 | 1 | 0.589092  | 1.071213  | 0.417812  | 2.043694  | 0.51924   |           | -1.165855 | 0.606537  | 0.118758  | 0.031536  | 0.075738  |
| Cj1421 | 1 | -0.964376 | -0.015374 | 0.147046  | 1.962031  | 0.336283  | 3.518523  |           | -0.015374 |           | 0.216238  | -0.754139 |
| Cj1422 | 1 | -2.280685 | -0.319046 | 0.094641  | -0.685477 | 0.411535  | 1.292252  | -1.988504 | 0.156008  |           | -0.147841 | -1.272994 |
| Cj1423 | 1 | -3.859352 | -0.280159 | 0.203264  |           | 0.424492  | -0.778432 | -0.46953  | 0.266876  | -0.290533 | -0.071421 | -0.852824 |
| Cj1424 | 1 | 1.933082  | 0.340733  | 0.42707   | 1.461686  | 2.40021   | 0.69073   | 2.085323  | 0.371503  | 2.210545  |           | 0.103128  |
| Cj1425 | 1 | -3.220278 | -0.002599 | -2.323372 | -3.995391 | -0.437135 | -0.180659 | 0.466536  | -0.354391 | 0.0782    | -0.043497 | -0.746374 |
| Cj1426 | 1 | -2.646564 | -0.018586 | -1.644758 | -2.535332 | -0.224486 | -1.07552  | -0.908334 | -0.247594 | 0.096667  | 0.031395  | -1.891643 |
| Cj1427 | 1 | -2.028558 | 0.428357  | 0.261591  | 1.097341  | 0.455544  | -1.245027 | -0.147841 | 0.282262  |           | 0.550901  |           |
| Cj1428 | 1 | -3.112787 | -0.221623 | 0.178492  | -3.660178 | 0.338453  | -1.782397 | -1.830332 | 0.485633  | 0.152248  | 0.075738  | -3.184425 |
| Cj1429 | 1 | -3.299028 | -0.627939 | -0.221287 | -5.368849 | -0.007667 | -3.081919 | -3.017417 | -0.071724 | -0.133369 | -0.200084 | -1.728813 |
| Cj1430 | 1 | -0.370713 | 0.714839  | 0.166844  | 1.003746  | 0.32112   | 2.600864  | 1.759156  | 0.16337   | 3.949292  | 1.080248  | 0.34301   |
| Cj1431 | 1 | -3.96804  | -2.341537 | -1.807427 |           | -0.386667 | -10.70275 | -4.051698 | 0.122606  | 0.073546  | 0.051442  | -2.783887 |
| Cj1432 | 1 | -2.498179 | -0.502873 | -3.534496 | -2.345931 | -0.500014 | -2.416577 | -1.897543 | -0.443203 | 0.48656   | 0.29678   | -2.246053 |
| Cj1433 | 1 | -3.740818 | -2.398208 | -0.230736 |           | 0.12075   |           | -6.221623 | -0.150241 | 0.053528  | -0.021072 | -4.194955 |

fiil

acpS

|        |   |           |           |           |           |           |           |           |           |           |
|--------|---|-----------|-----------|-----------|-----------|-----------|-----------|-----------|-----------|-----------|
| Cj1434 | 1 | -2.128472 | -0.191656 | 0.141564  | 0.324926  | -7.861448 | 0.135272  | 0.07286   | 0.233888  | -2.755356 |
| Cj1435 | 1 | -0.948141 | 0.73127   | 0.403377  | 0.535257  | 0.744592  | 0.350837  |           | 0.618239  | -0.366429 |
| Cj1436 | 1 | -2.784881 | -0.444184 | -0.152484 | 0.590434  | -6.058894 | 0.501516  | -0.163268 | 0.134089  | -2.291239 |
| Cj1437 | 1 | -2.229721 | -0.85022  | -0.038006 | 0.208642  | -4.016249 | -0.133052 | -0.028999 | 0.017922  | -2.204898 |
| Cj1438 | 1 | -2.708396 | -0.312223 | -0.324094 | 0.128953  | -5.205563 | 0.116498  | -0.071573 | 0.143785  | -2.213571 |
| Cj1439 | 1 | -3.056491 | -0.623265 | 0.219339  | 0.410775  | -4.506353 | 0.291839  | -0.11951  | 0.019773  | -2.296899 |
| Cj1440 | 1 | -2.995391 | 0.12446   | 0.238053  | 0.49057   | -8.380822 | 0.585924  | -0.120294 | -0.110916 | -2.792857 |
| Cj1441 | 1 | -3.316169 | -1.956796 | -1.72547  | -0.353469 | -4.9703   | -0.309896 | -0.17674  | -0.064465 | -3.392895 |
| Cj1442 | 1 | -0.858044 | -0.032536 | -1.436354 | -0.592702 | -0.098042 | 0.133695  | -1.046027 | 0.188148  | 0.146786  |
| Cj1443 | 1 | 0.151209  | 0.002018  | -0.953718 | -0.230059 | -0.8855   | -0.318146 | -0.72738  | 0.140255  | 0.131458  |
| Cj1444 | 1 | 0.158725  | 0.135929  | -0.072179 | 0.143393  | 0.086784  | 0.055196  | -0.264305 | 0.38084   | 0.044184  |
| Cj1445 | 1 | 0.125916  | -0.063861 | -0.401635 | -0.13005  | -0.2411   | -0.033127 | -0.271775 | -0.07127  | -0.117944 |
| Cj1446 | 1 | 0.145743  | -0.04707  | -0.944527 | -0.802638 | -0.467533 | 0.156267  | -0.651541 | -0.067939 | 0.036046  |
| Cj1447 | 1 | 0.180657  | -0.001155 | -0.715486 | -0.23226  | -0.78339  | -0.254117 | 0.077927  | -0.926865 | -0.125006 |
| Cj1448 | 1 | 0.203013  | -0.004479 | -0.992804 | -0.518494 | -0.5041   | -0.313119 | -0.41889  | -0.094957 | 0.08882   |
| Cj1449 | 1 | 0.088277  | 0.012354  | -0.755356 | -0.594008 | -0.375197 | 0.020627  | -0.790359 | 0.097341  | 0.058109  |
| Cj1450 | 1 | 0.215119  | 0.027579  | -0.39935  | -0.226004 | -0.353837 | -0.153286 | 0.30381   | -0.222465 | 0.091124  |
| Cj1451 | 1 | 0.258217  | 0.021764  | -0.145286 | -0.019609 | 0.083656  | 0.085833  | -0.012897 | 0.06929   | 0.059909  |
| Cj1452 | 1 | 0.231555  | 0.045862  | -0.463151 | 0.302524  | -0.478547 | 0.14496   | -0.04707  | -0.364385 | 0.506907  |
| Cj1453 | 1 | 0.03689   | -0.039637 | -0.816545 | -0.016687 | -0.918388 | 0.024462  | 0.142479  | -1.22196  | 0.295605  |
| Cj1454 | 1 | 0.045443  | -0.030767 | -0.558517 | -0.099124 | -0.94675  | 0.270708  | 0.048794  | -0.801883 | 0.011353  |
| Cj1455 | 1 | 0.03337   | 0.035061  | -0.161976 | 0.200379  | -0.670245 | 0.232047  | 0.041383  | -0.531156 | 0.157432  |
| Cj1456 | 1 | -0.128472 | 0.01564   | -0.254634 | 0.174534  | -0.408704 | 0.029276  | -1.097888 | -0.716434 | 0.254715  |
| Cj1457 | 1 | -0.111228 | -0.027528 | -0.653355 | -0.413307 | -0.685942 | -0.077041 | -0.105318 | -0.78339  | -0.06115  |
| Cj1458 | 1 | 0.097476  | -0.121392 | 0.028711  | 0.089905  | 0.040261  | -2.435183 | -0.48661  | 0.070252  | -1.920298 |
| Cj1459 | 1 | 0.27035   | 0.056167  | -0.021951 | 0.000289  | 0.120883  | 0.045862  | 0.011925  | 0.170694  | 0.023042  |
| Cj1460 | 1 | 0.223299  | 0.009777  | -0.307394 | 0.409907  | -0.347215 | 0.273217  | 0.190804  | -0.379883 | 0.490878  |
| Cj1461 | 1 | 0.214995  | 0.030407  | -0.391002 | -0.062656 | -0.465341 | 0.156785  | 0.116099  | -0.45799  | 0.046421  |
| Cj1462 | 1 | 0.064055  | -0.052596 | -0.340441 | 0.141564  | -0.468132 | 0.009777  | 0.022332  | -0.437135 | 0.165172  |
| Cj1463 | 1 | 0.108223  | 0.051442  | -0.190339 | 0.100978  | -0.171206 | -0.084976 | 0.064883  | -0.208228 | 0.025029  |
| Cj1464 | 1 | 0.101112  | 0.068189  | 0.149129  | 0.080248  | 0.350384  | -0.13242  | -0.274564 | 0.466131  | 0.025171  |
| Cj1465 | 1 | 0.046142  | 0.009491  | -0.923578 | 0.387804  | -1.179841 | 0.193204  | 0.38228   | -1.146883 | 0.444773  |
| Cj1466 | 1 | -0.015958 | 0.014927  | -0.734803 | 0.167229  | -1.122177 | 0.157949  | 0.086648  | -0.713829 | 0.189413  |
| Cj1467 | 1 | 0.180657  | 0.00101   | -0.540568 | 0.345169  | -0.889503 | 0.222434  | 0.142217  | -0.669786 | 0.375846  |
| Cj1468 | 1 | 0.153546  | 0.016496  | 0.301588  | 0.281194  | 0.293135  | 0.278223  | 0.030548  | 0.388134  | 0.385155  |

dut

prfB

flgI

flgK

|        |   |           |           |           |           |           |           |           |           |           |           |           |
|--------|---|-----------|-----------|-----------|-----------|-----------|-----------|-----------|-----------|-----------|-----------|-----------|
| Cj1469 | 1 | 0.118758  | 0.014498  | -0.618384 | -0.049308 | -0.838822 | 0.182057  | 0.08243   | -0.650635 | 0.065434  | 0.094912  | -0.310969 |
| Cj1470 | 1 | 0.123269  | -0.013917 | -0.595097 | 0.100709  | -0.782149 | 0.266876  | -0.018293 | -0.739854 | 0.092072  | 0.217851  | -0.337339 |
| Cj1471 | 1 | 0.161178  | 0.013498  | 0.013927  | -0.222801 | -0.025911 | -0.026646 | -0.283668 | 0.153546  | 0.012926  | 0.095317  | -0.094033 |
| Cj1472 | 1 | -0.116536 | 0.543991  | 0.176323  | -0.222465 | 0.286408  | -0.25739  | -0.497364 | 0.430178  | 0.018492  | 0.005472  | -0.231752 |
| Cj1473 | 1 | 0.015355  | -0.039488 | -0.58489  | -0.155213 | -0.457197 | -0.04886  | -0.174621 | -0.425269 | 0.00317   | 0.010637  | -0.172506 |
| Cj1474 | 1 | 0.132116  | -0.045283 | -0.147042 | 0.029276  | 0.101785  | -0.338068 | -0.070512 | 0.056584  | 0.038998  | 0.171335  | 0.072174  |
| Cj1475 | 1 | 0.085153  | 0.097746  | 0.355806  | 0.181802  | 0.27274   | 0.17557   | -0.096807 | 0.180403  | 0.167229  | 0.15004   | 0.133827  |
| Cj1476 | 1 | 0.0397    | -0.002021 | 0.355129  | 0.127369  | 0.138945  | 0.085425  | -0.114504 | 0.456175  | 0.367707  | 0.168129  | 0.10017   |
| Cj1477 | 1 | -0.054842 | -0.043051 | -0.996542 | 0.208642  | -1.216921 | 0.196607  | 0.103665  | -0.869069 | 0.402831  | 0.353097  | -0.111539 |
| Cj1478 | 1 | -0.122648 | 0.332164  | 0.025171  | 0.090311  | 0.146264  | 0.091801  | 0.155231  | 0.174279  | 0.022758  | 0.125519  | 0.359521  |
| Cj1479 | 1 | -0.000289 | 0.080112  | 0.118758  | 0.044744  | 0.248899  | -0.022977 | -0.052296 | 0.239887  | -0.039044 | -0.133369 | 0.352533  |
| Cj1480 | 1 | -0.044985 | 0.078746  | -0.047368 | 0.015069  | -0.352732 | -0.095111 | -0.124377 | 0.196103  | -0.058743 | -0.141462 | 0.311619  |
| Cj1481 | 1 | 0.027296  | 0.005184  | 0.070389  | -0.340075 | 0.207018  | -0.283492 | -0.246395 | -0.053344 | -0.037266 | -0.113255 | -0.261708 |
| Cj1482 | 1 | 0.127765  | 0.181802  | -0.304541 | -0.10967  | -0.202738 | -0.030767 | 0.05894   | -0.090342 | 0.088956  | 0.174662  | 0.000865  |
| Cj1483 | 1 | 0.1503    | 0.067226  | -0.349971 | 0.147828  | -0.517875 | 0.053111  | 0.065434  | -0.02239  | 0.178619  | 0.32239   | 0.040261  |
| Cj1484 | 1 | 0.255078  | 0.03492   | -0.470529 | 0.489235  | -0.595751 | 0.282143  | 0.284633  | -0.594008 | 0.569102  | 0.344942  | -0.39517  |
| Cj1485 | 1 | -0.033717 | 0.272501  | -0.007812 | -0.352363 | 0.082021  | 0.105276  | -0.186886 | -0.150721 | -0.08712  | -0.055891 | -0.097888 |
| Cj1486 | 1 | -0.130208 | -0.041566 | -0.570036 | -0.103302 | -0.682464 | 0.093019  | 0.113434  | -0.489241 | 0.059632  | -0.005058 | -0.218263 |
| Cj1487 | 1 | 0.092749  | 0.034075  | -0.086354 | 0.139731  | 0.155231  | 0.161565  | 0.107822  | 0.019488  | 0.021053  | -0.031504 | 0.087734  |
| Cj1488 | 1 | 0.108892  | 0.603787  | -0.227861 | 0.019488  | -0.103922 | -0.000289 | -0.156498 | 0.023752  | 0.023042  | -0.094957 | 0.180148  |
| Cj1489 | 1 | -0.018001 | -0.021219 | -0.709576 | -0.074001 | -1.004624 | 0.085968  | 0.168899  | -1.062204 | 0.215865  | 0.046142  | -0.481767 |
| Cj1490 | 1 | 0.151339  | 0.001442  | -0.472729 | 0.074231  | -0.676918 | 0.271665  | 0.303459  | -0.68455  | 0.121811  | 0.067639  | -0.253601 |
| Cj1491 | 1 | 0.246712  | -0.003033 | -0.39954  | 0.165301  | -0.261189 | 0.239398  | 0.134484  | -0.113099 | 0.119954  | 0.285461  | 0.073409  |
| Cj1492 | 1 | 0.221073  | 0.064607  | 0.224781  | 0.283092  | 0.228234  | 0.323774  | 0.002162  | 0.408494  | 0.314986  | 0.300182  | -0.07552  |
| Cj1493 | 1 | 0.231678  | -0.144489 | -0.079326 | -0.231583 | 0.104873  | 0.0842    | 0.113834  | -0.071118 | 0.059494  | 0.141825  | 0.249991  |
| Cj1494 | 1 | -0.121549 | -0.040675 | -0.529281 | 0.280481  | -0.753653 | 0.183074  | 0.358846  | -0.926317 | 0.329181  | 0.269991  | -0.631511 |
| Cj1495 | 1 | 0.213752  | 0.002018  | -0.470929 | 0.093831  | -0.576691 | 0.059771  | -0.025471 | -0.443988 | 0.145612  | 0.171207  | 0.083247  |
| Cj1496 | 1 | 0.166458  | 0.462157  | -0.043051 | 0.144699  | -0.128945 | 0.02361   | -0.320846 | 0.203013  | 0.072037  | 0.223299  | 0.006478  |
| Cj1497 | 1 | -0.38628  | -0.06537  | -0.501851 | -0.868279 | -0.228199 | -0.25739  | -0.197269 | -0.530322 | -0.240588 | -0.082988 | 0.097341  |
| Cj1498 | 1 | -0.081003 | -0.130681 | -0.065068 | -0.395739 | -0.03697  | -0.302226 | -0.047965 | -0.158429 | -0.346848 | -0.20141  | 0.162855  |
| Cj1499 | 1 | 0.126841  | 0.013927  | -0.54751  | 0.092207  | -0.678072 | 0.005184  | 0.134089  | -0.837532 | 0.063227  | 0.152248  | -0.043646 |
| Cj1500 | 1 | 0.127633  | 0.225028  | 0.179893  | 0.194591  | 0.136848  | 0.217975  | -0.134002 | 0.303225  | 0.213005  | 0.122871  | 0.020627  |
| Cj1501 | 1 | -0.137965 | -0.046325 | -0.876731 | 0.067226  | -0.863021 | 0.173511  | 0.406428  | -0.993379 | 0.266517  | 0.233275  | -0.597714 |
| Cj1502 | 1 | 0.029983  | -0.044985 | -0.565972 | 0.094236  | -0.679458 | 0.275126  | 0.146264  | -0.780909 | 0.158337  | 0.087599  | -0.411771 |
| Cj1503 | 1 | 0.090582  | -0.133211 | 0.311387  | 0.144046  | 0.210888  | 0.1038    | 0.044044  | 0.2444    | 0.082703  | -0.084058 | 0.196733  |

|        |   |           |           |           |           |           |           |           |           |           |           |           |
|--------|---|-----------|-----------|-----------|-----------|-----------|-----------|-----------|-----------|-----------|-----------|-----------|
| Cj1504 | 1 | 0.050049  | -0.026793 | -0.41062  | 0.515712  | -0.401825 | 0.148479  | 0.230818  | -0.1976   | 0.317188  | 0.313594  | -0.465938 |
| Cj1505 | 1 | -0.008537 | -0.488228 | 0.074505  | -0.818834 | 0.158078  | -0.182295 | -0.294243 | -0.075368 | -0.08896  | -0.066881 | 0.173255  |
| Cj1506 | 1 | -0.055891 | -0.011443 | -0.218934 | -0.027675 | -0.160685 | 0.083792  | 0.114634  | -0.226848 | 0.035765  | 0.090311  | -0.003901 |
| Cj1507 | 1 | 0.033511  | -0.046176 | -0.398018 | 0.020484  | -0.443988 | 0.043904  | -0.03697  | -0.260152 | -0.010716 | 0.006908  | 0.159112  |
| Cj1508 | 1 | 0.147697  | -0.008973 | -0.388167 | 0.471344  | -0.684086 | 0.188401  | 0.130667  | -0.90212  | 0.231924  | 0.094777  | -0.477743 |
| Cj1509 | 1 | 0.039138  | -0.043795 | -0.243318 | -0.066125 | -0.19479  | -0.02459  | -0.053643 | -0.33388  | -0.030767 | -0.124377 | -0.001155 |
| Cj1510 | 1 | 0.15549   | -0.019463 | -0.478145 | 0.122871  | -0.835729 | 0.347212  | 0.235114  | -0.999135 | 0.112767  | 0.029559  | -0.324816 |
| Cj1511 | 1 | 0.013784  | -0.007957 | -0.376508 | 0.192068  | -0.604498 | 0.032524  | 0.197865  | -0.650635 | 0.108892  | 0.122606  | -0.448115 |
| Cj1512 | 1 | 0.050049  | 0.220578  | 0.03689   | 0.070527  | 0.187388  | -0.087274 | -0.409853 | 0.370722  | 0.038015  | -0.024883 | -0.140826 |
| Cj1513 | 1 | 0.079839  | -0.118727 | -0.335881 | -0.164399 | -0.312581 | 0.018634  | -0.069755 | -0.26708  | -0.112475 | -0.014645 | -0.177882 |
| Cj1514 | 1 | 0.14496   | -0.030472 | -0.73889  | -0.005348 | -1.178208 | 0.040542  | 0.123004  | -0.749766 | 0.025879  | 0.102053  | -0.161331 |
| Cj1515 | 1 | 0.042784  | -0.043051 | -0.060397 | 0.141433  | -0.106249 | 0.097206  | 0.112767  | -0.072028 | 0.130536  | 0.099363  | -0.161976 |
| Cj1516 | 1 | 0.110096  | 0.051024  | 0.180912  | 0.311968  | 0.088684  | 0.252295  | 0.123666  | 0.473008  | 0.404031  | 0.259905  | -0.144808 |
| Cj1517 | 1 | -0.214575 | 0.028569  | -0.509841 | 0.092884  | -0.89459  | 0.208517  | 0.079429  | -0.725947 | 0.19774   | 0.130272  | -0.278584 |
| Cj1518 | 1 | -0.107337 | 0.012354  | -0.28736  | 0.124063  | -0.800877 | 0.153935  | 0.129745  | -0.432065 | 0.173767  | 0.072174  | -0.19347  |
| Cj1519 | 1 | -0.067183 | 0.0297    | 0.115965  | 0.352081  | -0.094187 | 0.286881  | 0.194591  | 0.164915  | 0.114367  | 0.088277  | -0.181149 |
| Cj1520 | 1 | 0.142479  | -0.399159 | 0.172359  | 0.091124  | 0.21313   | -0.152163 | -0.405069 | 0.468948  | 0.165172  | 0.089363  | -0.300804 |
| Cj1521 | 1 | 0.024036  | -1.101908 | -0.660635 | 0.00245   | -0.859614 | -0.002888 | 0.034779  | -0.649729 | 0.141956  | 0.132379  | -0.334789 |
| Cj1522 | 1 | -0.000722 | -2.173319 | -0.165855 | -0.180986 | -0.170881 | 0.148609  | 0.063641  | -0.112475 | 0.033088  | -0.000866 | -0.386657 |
| Cj1523 | 1 | 0.040822  | -2.690591 | 0.087734  | -0.025911 | 0.128557  | -0.064012 | -0.121235 | 0.212881  | -0.003033 | 0.035061  | -0.111228 |
| Cj1524 | 1 | 0.086784  | -2.270904 | 0.231064  | -0.009263 | 0.037874  | -0.003611 | -0.131945 | 0.257131  | 0.283566  | 0.191689  | -0.307394 |
| Cj1525 | 1 | 0.117695  | -0.906169 | -0.97228  | -0.048711 | -1.333153 | -0.030767 | 0.297954  | -1.165531 | 0.389897  | 0.286645  | -0.37707  |
| Cj1526 | 1 | -0.368104 | -1.495736 | -0.584674 | 0.021053  | -0.834956 | 0.034638  | -0.081919 | -0.274564 | 0.261832  | 0.170181  | 0.068877  |
| Cj1527 | 1 | 0.233275  | -0.168933 | -0.312939 | 0.158596  | -0.385714 | -0.235484 | 0.294547  | -0.048412 | 0.319734  | 0.133564  | -0.091879 |
| Cj1528 | 1 | 0.341986  | -0.225835 | -0.538471 | 0.134878  | -0.671393 | -0.642504 | 0.164529  | -0.462952 | 0.375735  | 0.15069   | 0.081067  |
| Cj1529 | 1 | 0.102725  | 0.023184  | -0.280685 | 0.107286  | -0.449296 | 0.195852  | 0.123799  | -0.366243 | 0.0229    | -0.114504 | -0.213571 |
| Cj1530 | 1 | -0.054542 | 0.02148   | -0.454822 | 0.137897  | -0.775466 | 0.235237  | 0.282618  | -0.243318 | 0.210888  | 0.157302  | 0.003746  |
| Cj1531 | 1 | 0.241352  | 0.15017   | 0.050885  | 0.038155  | 0.051442  | 0.067226  | 0.057     | 0.274053  | -0.061752 | 0.012497  | 0.132774  |
| Cj1532 | 1 | 0.144177  | 0.040402  | -0.154731 | 0.183074  | -0.17511  | 0.061707  | 0.030265  | -0.09111  | 0.402613  | 0.195096  | -0.093879 |
| Cj1533 | 1 | 0.22404   | -0.016687 | -0.577121 | 0.206393  | -1.03357  | 0.146264  | 0.204266  | -0.781901 | 0.302173  | 0.199374  | 0.011925  |
| Cj1534 | 1 | -0.08896  | 0.021195  | -0.436744 | 0.185613  | -0.782893 | 0.200128  | 0.167101  | -0.238715 | 0.275961  | 0.33674   | 0.121679  |
| Cj1535 | 1 | 0.022616  | 0.264837  | 0.136323  | -0.261708 | 0.217603  | -0.331699 | -0.48217  | 0.230326  | -0.446738 | -0.421399 | 0.301588  |
| Cj1536 | 1 | 0.137372  | 0.046421  | -0.127526 | 0.073272  | -0.019317 | -0.049756 | 0.037171  | 0.265797  | 0.272143  | 0.166972  | 0.265557  |
| Cj1537 | 1 | -0.009699 | -0.430314 | 0.04684   | -0.345198 | -0.057992 | -0.19446  | -0.082683 | -0.209395 | -0.401063 | -0.15682  | 0.212383  |
| Cj1538 | 1 | 0.160404  | 0.016924  | -0.351811 | 0.001586  | -0.431287 | 0.27262   | 0.190678  | -0.304362 | 0.040682  | 0.084064  | 0.136848  |

moaD

moaE

moaA2

dapF

|        |   |           |           |           |           |           |           |           |           |           |           |           |
|--------|---|-----------|-----------|-----------|-----------|-----------|-----------|-----------|-----------|-----------|-----------|-----------|
| Cj1539 | 1 | 0.020058  | -0.06356  | 0.140386  | 0.10541   | 0.092613  | 0.094371  | 0.090447  | 0.239031  | 0.067226  | 0.158596  | 0.219091  |
| Cj1540 | 1 | -0.02371  | 0.277271  | 0.100843  | 0.302875  | 0.179638  | 0.114634  | -0.126266 | 0.23842   | 0.078883  | 0.011209  | 0.096667  |
| Cj1541 | 1 | -0.142895 | -0.267427 | 0.105276  | -1.469929 | 0.583327  | 0.513491  | 2.010923  | -0.007377 |           | 0.059632  | 0.213378  |
| Cj1542 | 1 | -0.089728 | -0.160685 | -0.050652 | -0.381385 | -0.041269 | -0.102682 | 0.001442  | -0.087427 | -0.235484 | -0.093417 | 0.163112  |
| Cj1543 | 1 | 0.025738  | 0.040822  | -0.070663 | -0.07963  | 0.116631  | -0.547088 | -0.372954 | 0.146134  | -0.210062 | 0.08352   | 0.194339  |
| Cj1544 | 1 | -0.060096 | 0.515511  | 0.075464  | 0.379177  | 0.212507  | 0.166844  | -0.252742 | 0.361881  | 0.235237  | 0.127237  | 0.033511  |
| Cj1545 | 1 | -0.25877  | -0.124063 | 0.046421  | -0.262919 | -0.007812 | -0.192975 | 0.046421  | -0.232599 | -0.08804  | -0.048263 | 0.121546  |
| Cj1546 | 1 | 0.1145    | -0.021511 | -0.246909 | -0.075368 | -0.052745 | 0.131326  | 0.218595  | -0.110293 | 0.07286   | 0.001298  | 0.168899  |
| Cj1547 | 1 | -0.084976 | 0.037453  | -0.204067 | 0.061984  | 0.129085  | 0.167358  | 0.108625  | 0.151339  | -0.174133 | 0.037734  | 0.186501  |
| Cj1548 | 1 | -0.337521 | 0.247685  | -0.281386 | 0.189793  | 0.221073  | 0.09815   | -0.109826 | 0.331591  | 0.124328  | 0.001874  | 0.04684   |
| Cj1549 | 1 | -3.638456 | -0.213404 | -0.074001 | -0.214575 | -0.176414 | -0.067788 | -5.00231  | -0.393463 | -0.40316  | -0.221119 | 0.015212  |
| Cj1550 | 1 | -3.880445 | -0.000289 | -0.244002 | -0.053943 | -0.183933 | 0.130536  | -4.756331 | -0.132894 | -0.066881 | -0.027969 | -0.476538 |
| Cj1551 | 1 | -2.805913 | 0.051442  | 0.283922  | 2.629077  | 0.446997  | -3.414268 |           | 0.258217  | 0.903424  | 0.171719  | 0.572211  |
| Cj1552 | 1 | -1.605596 | 0.741661  | 0.331247  | 0.644041  | 0.573568  |           |           | 0.547845  | 0.051998  | -0.0511   | -0.094957 |
| Cj1553 | 1 | -0.990796 | -0.314912 | 0.254473  | -0.219438 | 0.31904   | 4.926298  |           | 0.07779   | 0.635244  | -2.129103 | 0.941632  |
| Cj1554 | 1 | -2.087427 | -0.264478 | 0.256286  | -0.908876 | 0.437334  | -0.631735 | -1.955116 | 0.042224  | -0.324816 | -0.105628 | 0.116498  |
| Cj1555 | 1 | -1.121863 | -0.209061 | 0.260267  |           | 0.359296  | -1.487621 | -1.316887 | 0.181421  | -1.572608 | -0.33898  | 0.040822  |
| Cj1556 | 1 | -1.752437 | 0.167743  | 0.296076  | 0.307895  | 0.023468  | 0.106884  | -0.565332 | 0.46048   | 0.249749  | 0.171335  | -0.079173 |
| Cj1557 | 1 | -1.178208 | -0.33661  | -0.14003  | 0.035202  | -0.330066 | -0.064917 | 0.017494  | -0.062354 | -0.033274 | -0.040823 | 0.021053  |
| Cj1558 | 1 | -2.198262 | -0.307216 | 0.201759  | -0.071724 | 0.240253  | -0.040972 | 0.143263  | 0.111833  | -0.081461 | 0.101247  | -0.047517 |
| Cj1559 | 1 | -1.138283 | -0.02239  | 0.069702  | 0.182946  | -0.149921 | 0.07738   | 0.0719    | 0.329296  | 0.196859  | 0.229096  | -0.020194 |
| Cj1560 | 1 | -0.795859 | -0.038747 | 0.344601  | 0.147437  | 0.162081  | -0.75877  | -0.387978 | 0.49416   | 0.190299  | 0.1141    | -0.086507 |
| Cj1561 | 1 | -0.252742 | -0.158107 | -0.015666 | 0.034075  | -0.027087 | -0.16942  | -0.197931 | -0.055142 | 0.009491  | 0.148348  | -0.169582 |
| Cj1562 | 1 | -0.242977 | -0.100824 | 0.008774  | 0.092072  | -0.057091 | -0.109359 | -0.127683 | 0.076012  | 0.03196   | 0.16543   | 0.078063  |
| Cj1563 | 1 | -0.197765 | 0.556993  | 0.280125  | 0.950319  | 0.621993  | 2.650627  |           | 0.245861  | 2.055508  | 0.53456   | 0.480679  |
| Cj1564 | 1 | 0.111566  | 0.626486  | 0.402831  | 0.267716  | 0.532666  | -0.10036  | -0.093571 | 0.580531  | 0.410992  | 0.510152  | 0.037312  |
| Cj1565 | 1 | 0.234256  | -0.028558 | -0.22095  | -0.142099 | -0.165855 | 0.09126   | 0.066813  | -0.069755 | 0.061292  | 0.035765  | -0.495532 |
| Cj1566 | 1 | -0.792607 | 0.029276  | -0.85909  | -0.215077 | -0.941476 | -0.63554  | -0.235654 | -0.936773 | 0.534659  | 0.35727   | -0.722848 |
| Cj1567 | 1 | 0.024036  | 0.009777  | 0.229465  | 0.144699  | 0.185359  | 0.135535  | 0.037171  | 0.24123   | 0.009634  | 0.063089  | -0.068998 |
| Cj1568 | 1 | -0.053494 | 0.024036  | -0.286656 | 0.511772  | -0.418311 | 0.187008  | 0.398679  | -0.456009 | 0.311619  | 0.273576  | -0.638456 |
| Cj1569 | 1 | -0.067636 | -0.338798 | -0.040527 | -0.284194 | 0.116365  | -0.316348 | -0.24366  | -0.094803 | -0.187871 | -0.208228 | -0.243489 |
| Cj1570 | 1 | -0.047666 | -0.023563 | -0.111072 | -0.317067 | -0.317786 | 0.027154  | 0.114634  | -0.127211 | 0.023042  | -0.17511  | -0.192975 |
| Cj1571 | 1 | -0.050951 | -0.016395 | -0.206562 | 0.102591  | -0.637109 | -0.153928 | 0.022048  | -0.328435 | -0.073697 | -0.199255 | -0.422752 |
| Cj1572 | 1 | -0.053344 | 0.59579   | 0.54745   | -0.079326 | 0.622274  | -0.196112 | -0.234465 | 0.560911  | 0.204266  | -0.021072 | -0.086661 |
| Cj1573 | 1 | 0.906044  | 0.705049  | 0.077106  |           | 0.379288  | 0.367147  | -0.155855 | -0.106249 | 0.627607  | 0.007052  | 0.511873  |

|        |   |           |           |           |           |           |           |           |           |           |           |           |
|--------|---|-----------|-----------|-----------|-----------|-----------|-----------|-----------|-----------|-----------|-----------|-----------|
| Cj1574 | 1 | -0.181313 | -0.006942 | -0.555545 | 0.358284  | -0.894858 | 0.22367   | 0.347779  | -0.703454 | 0.267236  | 0.189034  | -0.413307 |
| Cj1575 | 1 | 0.016211  | 0.3639    | 0.269033  | 0.115033  | 0.394075  | 0.111031  | -0.009844 | 0.439357  | 0.082566  | 0.009347  | 0.479955  |
| Cj1576 | 1 | 0.065572  | 0.502636  | 0.086648  | 0.003746  | 0.221197  | 0.19333   | -0.161815 | 0.356707  | 0.1333    | 0.012926  | 0.351289  |
| Cj1577 | 1 | -0.169582 | -0.060247 | -0.252398 | -0.182295 | -0.271601 | -0.140189 | -0.048263 | -0.287008 | -0.112163 | -0.082988 | -0.313298 |
| Cj1578 | 1 | -0.185245 | 0.056167  | -0.127841 | -0.047965 | -0.097733 | -0.077193 | 0.121944  | -0.03549  | 0.125916  | 0.009491  | -0.145925 |
| Cj1579 | 1 | 0.053389  | 0.220454  | -0.077193 | -0.202406 | 0.187894  | -0.171531 | 0.063641  | 0.196355  | -0.035195 | 0.005184  | 0.065848  |
| Cj1580 | 1 | 0.011496  | 0.648465  | 0.337426  | -0.18968  | 0.445833  | -0.142576 | -0.452057 | 0.592636  | -0.102217 | -0.007812 | 0.03492   |
| Cj1581 | 1 | 0.005903  | 0.020342  | -0.629724 | -0.119197 | -0.827769 | 0.155102  | -0.400082 | -0.516842 | 0.057831  | 0.064607  | -0.101289 |
| Cj1582 | 1 | -0.061752 | 0.12499   | -0.055291 | -0.004914 | -0.110449 | 0.051163  | 0.069152  | 0.013641  | 0.064469  | 0.136454  | -0.077954 |
| Cj1583 | 1 | 0.178747  | 0.533962  | 0.259303  | -0.078107 | 0.317883  | -0.193965 | -0.057542 | 0.278104  | 0.052138  | -0.218934 | 0.061016  |
| Cj1584 | 1 | 0.059217  | 0.648373  | 0.201257  | -0.798617 | 0.513289  | -0.091418 | -0.196608 | 0.466027  | -0.026646 | -0.005638 | -0.209728 |
| Cj1585 | 1 | -2.623265 | -2.171368 | -0.198262 | -0.33661  | -0.390623 | -0.113411 | -0.111383 | -0.316169 | -0.208728 | -0.841404 | 0.069702  |
| Cj1586 | 1 | 0.059632  | 0.008057  | -0.021951 | -0.013334 | -0.024296 | -0.132578 | 0.162855  | 0.054223  | 0.047678  | -0.01917  | 0.153935  |
| Cj1587 | 1 | 0.225152  | 0.061707  | -0.20573  | 0.024603  | 0.135535  | 0.107018  | 0.054779  | 0.147697  | -0.067788 | -0.056791 | -0.001732 |
| Cj1588 | 1 | 0.168385  | 0.004609  | -0.1882   | 0.24184   | -0.211231 | 0.000721  | -0.169096 | -0.144967 | 0.228726  | 0.042644  | -0.046623 |
| Cj1589 | 1 | 0.024603  | -0.216921 | -0.110137 | -0.344648 | -0.111539 | -0.125636 | 0.063089  | -0.122177 | 0.038577  | -0.161008 | 0.1129    |
| Cj1590 | 1 | 0.253021  | -0.088807 | -0.038599 | -0.566613 | -0.054093 | -0.232939 | 0.043764  | 0.067501  | -0.302048 | -0.130997 | 0.224287  |
| Cj1591 | 1 | 0.137897  | -0.009118 | -0.219102 | 0.14978   | -0.388733 | -0.028852 | -0.123905 | -0.221287 | 0.088684  | 0.143002  | -0.063711 |
| Cj1592 | 1 | -0.078259 | -0.040972 | -0.297963 | 0.325156  | -0.266732 | 0.078883  | -0.339345 | -0.262573 | 0.105812  | 0.128293  | -0.691756 |
| Cj1593 | 1 | 0.143002  | 0.012211  | -0.647241 | 0.351515  | -0.892714 | 0.220701  | 0.432318  | -1.254978 | 0.469886  | 0.310689  | -0.708396 |
| Cj1594 | 1 | 0.085833  | -0.038006 | 0.167486  | -0.904278 | 0.214995  | -0.147042 | -0.13622  | -0.016395 | -0.240929 | -0.291239 | 0.299245  |
| Cj1595 | 1 | 0.140386  | -0.107182 | 0.083111  | 0.151989  | 0.15082   | 0.026588  | -0.013625 | 0.121811  | 0.063365  | 0.069152  | 0.069015  |
| Cj1596 | 1 | -0.021365 | 0.057554  | 0.147697  | 0.278698  | 0.205518  | 0.119821  | -0.08024  | 0.321235  | 0.227125  | -0.028116 | -0.141621 |
| Cj1597 | 1 | 0.061016  | -0.500218 | 0.10742   | -0.014937 | 0.290896  | -0.079326 | 0.018777  | -0.065974 | -0.183277 | -0.124534 | -0.063108 |
| Cj1598 | 1 | -0.134952 | -0.009408 | -0.088193 | 0.11023   | -0.1181   | 0.093831  | 0.074368  | 0.007052  | -0.050204 | -0.080698 | -0.172831 |
| Cj1599 | 1 | 0.037171  | -0.131155 | 0.253989  | 0.083384  | 0.198368  | 0.251931  | 0.0297    | 0.310689  | -0.252054 | -0.00231  | 0.091395  |
| Cj1600 | 1 | -0.060247 | 0.134615  | 0.364012  | 0.123401  | 0.223546  | 0.091801  | -0.224317 | 0.537048  | -0.004045 | -0.173482 | -0.25068  |
| Cj1601 | 1 | -0.237694 | -0.029146 | 0.000577  | -0.265171 | -0.151522 | -0.272646 | -0.075064 | -0.167475 | -0.301337 | -0.332607 | -0.3893   |
| Cj1602 | 1 | -0.994528 | -0.010861 | 0.032806  | -0.186229 | -0.185409 | -0.387789 | -0.021951 | -0.090189 | -0.299028 | -0.523463 | -0.040378 |
| Cj1603 | 1 | -0.186393 | -0.08712  | 0.196229  | 0.026871  | 0.268913  | -0.093417 | 0.003314  | 0.248413  | -0.172669 | -0.128156 | 0.042644  |
| Cj1604 | 1 | -0.110137 | 0.041243  | 0.380397  | 0.062122  | 0.257373  | -0.097733 | -0.230228 | 0.563549  | 0.122474  | 0.032242  | -0.198262 |
| Cj1605 | 1 | -0.236333 | -0.682001 | 0.048236  | -0.080393 | 0.100978  | -0.560005 | -0.519942 | -0.12926  | -0.100979 | -0.085742 | 0.011209  |
| Cj1606 | 1 | -0.030472 | -0.332426 | 0.243182  | -0.054542 | 0.118493  | -0.39498  | 0.134878  | 0.00992   | -0.117631 | -0.03549  | 0.100843  |
| Cj1607 | 1 | 0.245861  | 0.039279  | 0.18409   | -0.374075 | 0.585828  | -0.170232 | -0.103457 | 0.361993  | 0.172488  | 0.123931  | 0.118758  |
| Cj1608 | 1 | 0.159758  | -0.035786 | -0.173319 | 0.35321   | -0.238885 | 0.069152  | 0.020484  | 0.11929   | 0.317883  | 0.223423  | -0.369408 |

|        |   |           |           |           |           |           |           |           |           |           |           |           |
|--------|---|-----------|-----------|-----------|-----------|-----------|-----------|-----------|-----------|-----------|-----------|-----------|
| Cj1609 | 1 | 0.070115  | 0.005759  | 0.004178  | 0.092613  | -0.054093 | 0.155102  | 0.159758  | -0.058593 | 0.116365  | 0.06226   | 0.032101  |
| Cj1610 | 1 | 0.005041  | 0.124328  | 0.089905  | -0.133685 | 0.396379  | -0.240077 | 0.061845  | 0.119954  | -0.368104 | 0.008774  | 0.044184  |
| Cj1611 | 1 | 0.125254  | 0.072998  | 0.325847  | 0.275961  | 0.281075  | 0.036327  | 0.109561  | 0.359071  | 0.110497  | 0.070939  | 0.146264  |
| Cj1612 | 1 | 0.069152  | 0.016496  | 0.4728    | 0.333767  | 0.167101  | 0.094641  | 0.075601  | 0.397693  | 0.386701  | 0.151729  | 0.0082    |
| Cj1613 | 1 | 0.098015  | -0.208061 | 0.097476  | -0.005638 | 0.194213  | -0.068998 | -0.244002 | -0.096807 | -0.126266 | -0.038747 | -0.120294 |
| Cj1614 | 1 | 0.153416  | -0.213404 | 0.102322  | 0.195474  | -0.21424  | 0.147828  | 0.188781  | 0.059909  | -0.090649 | 0.022758  | -0.049756 |
| Cj1615 | 1 | -0.271426 | 0.171079  | 0.282618  |           | 0.439464  | 2.883152  | -0.924125 | 0.296193  |           | 1.40305   | -0.258425 |
| Cj1616 | 1 | 0.094101  | 0.799833  | 0.386038  | 0.131721  | 0.639417  | -0.117631 | -0.430314 | 0.607863  | 0.135009  | -0.068998 | -0.270556 |
| Cj1617 | 1 | 0.179384  | -0.215245 | 0.006334  | 0.039138  | 0.071763  | 0.103531  | -0.143213 | -0.005782 | -0.007522 | 0.043764  | -0.205064 |
| Cj1618 | 1 | -0.358639 | -0.299738 | 0.097476  | 0.054779  | 0.184725  | -0.028558 | -0.256183 | 0.108089  | -0.019317 | 0.062951  | 0.151989  |
| Cj1619 | 1 | -0.159557 | 0.201257  | 0.307895  | -1.045729 | 0.464773  | 0.06695   | -0.132736 | 0.220701  |           | 0.082021  | 0.021195  |
| Cj1620 | 1 | -0.073545 | 0.392537  | 0.274291  | -0.29814  | 0.238665  | -0.273343 | -0.334062 | 0.46069   | 0.135535  | -0.07765  | -0.140985 |
| Cj1621 | 1 | -0.375946 | 1.07567   | 0.080658  |           | 0.340163  | 0.878608  | 0.657183  | -0.072028 | 0.766129  | 0.045583  | 1.698352  |
| Cj1622 | 1 | -0.213738 | 0.312084  | 0.172872  | 0.076833  | 0.342213  | 0.014498  | 0.077653  | 0.181929  | 0.116764  | 0.057416  | 0.395392  |
| Cj1623 | 1 | 0.058801  | 0.552672  | 0.177344  | -1.865648 | 0.470823  | 0.033934  | 0.060462  | 0.370164  | -0.580138 | 0.063503  | 0.640436  |
| Cj1624 | 1 | -0.134477 | 0.38648   | 0.413702  | 0.052277  | 0.413702  | -0.025324 | -0.096036 | 0.584097  | 0.147437  | -0.011006 | 0.342441  |
| Cj1625 | 1 | -0.518288 | 0.146786  | 0.15004   | 0.141433  | 0.259423  | 0.064193  | -0.078716 | -0.092494 | 0.035624  | 0.152378  | 0.194339  |
| Cj1626 | 1 | -0.152003 | -0.012752 | 0.178364  | 0.078746  | 0.130272  | 0.117562  | 0.121546  | 0.127369  | 0.087463  | 0.097611  | 0.041383  |
| Cj1627 | 1 | 0.245617  | 0.703012  | 0.292428  |           | 0.644687  | -0.817308 | -2.342269 | 0.45607   | -0.079783 | 0.259423  | 0.424385  |
| Cj1628 | 1 | -0.204898 | 1.126576  | 0.216486  | -5.717857 | 0.574053  | -0.453439 | -0.059946 | 0.531868  |           | 0.195977  | 2.138257  |
| Cj1629 | 1 | 0.037593  | -0.03934  | -0.751708 | 0.395502  | -0.979658 | 0.400429  | 0.369941  | -1.016249 | 0.453122  | 0.344033  | -0.507173 |
| Cj1630 | 1 | -0.08467  | 0.548831  | 0.1396    | 0.074505  | 0.298658  | 0.098285  | 0.087055  | 0.173639  | 0.167358  | 0.190678  | 0.536948  |
| Cj1631 | 1 | 0.142087  | 0.500394  | 0.217727  | 0.247198  | 0.307662  | 0.154583  | 0.057     | 0.401521  | 0.062674  | 0.101516  | 0.380064  |
| Cj1632 | 1 | 0.15017   | 0.646808  | 0.436908  | 0.164915  | 0.406754  | 0.290306  | -0.032831 | 0.472072  | 0.271784  | 0.154065  | 0.251204  |
| Cj1633 | 1 | 0.019773  | -0.509635 | 0.013498  | -0.372393 | 0.027012  | -0.085129 | -0.013917 | -0.070663 | -0.109981 | -0.013043 | 0.301822  |
| Cj1634 | 1 | 0.093831  | -0.106405 | 0.1137    | -2.598588 | -0.048711 | -0.166503 | -0.054242 | -0.075368 | -0.319766 | -0.127211 | 0.100574  |
| Cj1635 | 1 | -0.008682 | -0.182131 | 0.152508  | -0.004769 | 0.071488  | -0.062957 | -0.041863 | 0.20201   | -0.140507 | -0.03623  | 0.171847  |
| Cj1636 | 1 | 0.149389  | 0.018777  | -0.337886 | 0.174534  | -0.444773 | 0.226139  | -0.041714 | -0.366057 | 0.011066  | 0.009347  | 0.053528  |
| Cj1637 | 1 | 0.199248  | -0.041269 | -0.359749 | -0.304006 | -0.334425 | 0.098554  | 0.20389   | -0.610653 | 0.045443  | 0.000289  | -0.13622  |
| Cj1638 | 1 | 0.14509   | -0.192975 | 0.027296  | -0.136854 | -0.007667 | 0.137504  | 0.091395  | -0.028999 | -0.130523 | 0.104873  | 0.295253  |
| Cj1639 | 1 | 0.176706  | 0.029418  | -0.225835 | 0.222681  | -0.306502 | 0.188021  | -0.008973 | -0.082225 | 0.035483  | 0.234133  | 0.085289  |
| Cj1640 | 1 | 0.036749  | 0.020484  | -0.12202  | 0.388796  | -0.482775 | 0.225275  | -0.090035 | -0.09234  | 0.154972  | 0.266277  | -0.137965 |
| Cj1641 | 1 | -0.002888 | -0.006507 | -0.348133 | -0.022977 | -0.655863 | 0.067226  | 0.175684  | -0.759747 | 0.166073  | 0.096397  | -0.111072 |
| Cj1642 | 1 | 0.035483  | -0.3485   | 0.190299  | -2.276485 | 0.253142  | -0.123591 | 0.092207  | 0.027579  | -0.524915 | 0.004322  | 0.232538  |
| Cj1643 | 1 | 0.053945  | -0.058293 | -0.130208 | 0.112367  | -0.140826 | -0.000866 | 0.064331  | -0.120451 | -0.062354 | -0.002021 | 0.210514  |

|        |      |   |           |           |           |           |           |           |           |           |           |           |           |
|--------|------|---|-----------|-----------|-----------|-----------|-----------|-----------|-----------|-----------|-----------|-----------|-----------|
| Cj1644 | ispA | 1 | 0.001154  | 0.059632  | 0.065159  | 0.258338  | -0.065521 | 0.041804  | -0.092494 | 0.271187  | 0.237931  | 0.043484  | 0.08352   |
| Cj1645 | tkf  | 1 | -0.187214 | -0.246738 | 0.204266  | 0.746485  | 0.474047  | 0.589763  | -0.456207 | -0.054093 |           | 0.074916  | -0.023563 |
| Cj1646 | iamB | 1 | 0.008774  | 0.008917  | -0.231413 | 0.156397  | -0.267601 | 0.112367  | 0.090582  | -0.209395 | 0.143263  | 0.050467  | -0.073241 |
| Cj1647 | iamA | 1 | 0.200128  | 0.066261  | 0.182946  | 0.165044  | 0.257011  | 0.106214  | 0.131063  | 0.263876  | -0.229382 | 0.044884  | 0.124196  |
| Cj1648 |      | 1 | -0.006362 | 0.393965  | 0.406646  | 0.126709  | 0.829931  | -1.583376 | -0.237013 | 0.517427  | -0.001732 | 0.058247  | -0.011588 |
| Cj1649 |      | 1 | 0.109695  | -0.06115  | -0.277009 | 0.037312  | -0.179351 | 0.060877  | 0.084881  | -0.248965 | 0.086648  | 0.032947  | 0.044744  |
| Cj1650 |      | 1 | 0.195474  | -0.227016 | 0.172231  | -0.054093 | 0.191184  | 0.044744  | 0.045303  | 0.105276  | -0.067485 | -0.034751 | -0.057091 |
| Cj1651 |      | 1 | 0.160146  | -0.177882 | 0.266637  | 0.17645   | 0.323774  | -0.189022 | -0.131629 | 0.283566  | -0.139871 | -0.037266 | 0.289952  |
| Cj1652 |      | 1 | 0.142609  | 0.167615  | -0.138918 | 0.081203  | -0.406025 | -0.324816 | -0.396308 | 0.442545  | -0.028705 | -0.001588 | -0.12312  |
| Cj1653 |      | 1 | 0.110096  | -0.446934 | -0.012024 | -0.292475 | 0.059494  | -0.213906 | -0.133685 | -0.069452 | -0.402207 | -0.103612 | 0.0202    |
| Cj1654 |      | 1 | 0.010493  | -0.165531 | -0.059044 | -0.088347 | -0.196938 | -0.017563 | -0.172344 | -0.15859  | -0.168609 | -0.122491 | 0.149129  |
| Cj1655 |      | 1 | 0.045443  | -0.002744 | -0.425269 | 0.182692  | -0.511279 | 0.09329   | 0.058109  | -0.459378 | 0.1145    | 0.10608   | -0.016103 |
| Cj1656 |      | 1 | 0.017067  | 0         | 0.158078  | 0.1995    | 0.093154  | 0.094236  | -0.266038 | 0.413486  | 0.185105  | 0.132116  | -0.190833 |
| Cj1657 |      | 1 | -0.178045 | -0.137965 | -0.086507 | -0.07552  | -0.115285 | 0.114367  | -0.104387 | -0.131787 | -0.096499 | -0.189351 | -0.220782 |
| Cj1658 |      | 1 | 0.017494  | -0.039933 | 0.050606  | 0.048934  | 0.176706  | 0.083111  | 0.075875  | 0.0397    | 0.04991   | 0.071351  | -0.082225 |
| Cj1659 | p19  | 1 | -0.122491 | 0.690015  | 0.348006  | 0.57289   | 0.455965  | 1.061361  | 0.783415  | 0.274291  |           | 0.22033   | 0.419323  |
| Cj1660 |      | 1 | -0.079478 | 0.656359  | 0.372061  | 0.185359  | 0.623867  | 0.008487  | -0.362529 | 0.551393  | 0.307079  | 0.075327  | 0.055612  |
| Cj1661 |      | 1 | 0.079975  | 0.00992   | -0.142099 | -0.02503  | -0.097579 | 0.028145  | 0.094101  | -0.200084 | 0.113434  | -0.002455 | -0.093571 |
| Cj1662 |      | 1 | -0.04023  | -0.202074 | 0.126444  | 0.025738  | 0.092478  | 0.029135  | 0.035483  | 0.061845  | -0.027528 | 0.055751  | -0.043497 |
| Cj1663 |      | 1 | 0.225645  | -0.035934 | -0.039488 | 0.328262  | -0.390812 | 0.409147  | 0.153935  | -0.19446  | 0.340847  | 0.27608   | 0.041383  |
| Cj1664 |      | 1 | -0.019317 | 0.376846  | 0.249627  | 0.198368  | 0.413377  | 0.182311  | -0.152965 | 0.520246  | 0.279174  | 0.027579  | -0.067183 |
| Cj1665 |      | 1 | -0.323011 | -0.028558 | -0.742024 | 0.390117  | -0.70228  | 0.253384  | 0.426211  | -1.004335 | 0.416948  | 0.274411  | -0.502873 |
| Cj1666 |      | 1 | -0.154249 | -0.192645 | -0.167312 | -0.059645 | 0.071625  | 0.154194  | 0.028145  | 0.002883  | 0.068327  | 0.05797   | 0.017922  |
| Cj1667 |      | 1 | -0.42082  | 0.206393  | 0.175812  | -1.016541 | 0.213254  | 0.044324  | -0.049905 | 0.215244  | -0.631958 | 0.071213  | -0.138759 |
| Cj1668 |      | 1 | -0.330066 | 0.476226  | 0.34551   | 0.260507  | 0.359296  | 0.156267  | -0.16942  | 0.325617  | 0.381948  | 0.226262  | -0.319586 |
| Cj1669 |      | 1 | 0.060047  | 0.087599  | -0.149281 | 0.264596  | -0.18968  | 0.415001  | 0.289952  | -0.132578 | 0.252295  | 0.138552  | 0.200881  |
| Cj1670 |      | 1 | 0.008917  | 0.478609  | 0.163499  | 0.213627  | 0.389126  | 0.254836  | 0.020627  | 0.183709  | 0.264236  | 0.128689  | 0.364572  |
| Cj1671 |      | 1 | 0.161178  | 0.490673  | 0.262794  | 0.286999  | 0.595408  | 0.110764  | 0.147958  | 0.476641  | 0.292075  | 0.10286   | 0.50924   |
| Cj1672 |      | 1 | 0.138814  | 0.819995  | 0.382391  | -0.272472 | 0.651683  | 0.041523  | -0.081614 | 0.54962   | -0.067334 | 0.177471  | 0.23352   |
| Cj1673 |      | 1 | -0.137172 | 0.398569  | 0.047818  | 1.50121   | 0.406972  | 2.39742   | 1.627373  | -0.059345 | 4.306255  |           | 0.151859  |
| Cj1674 |      | 1 | -0.282439 | 0.042224  | -0.62638  | 0.122474  | -0.583809 | 0.237686  | 0.239765  | -0.492687 | 0.207643  | 0.080385  | -0.131945 |
| Cj1675 | fliQ | 1 | -0.160202 | 0.006334  | -0.256011 | 0.226509  | -0.271426 | 0.269632  | 0.302407  | -0.062656 | 0.364797  | 0.238665  | -0.413884 |
| Cj1676 | murB | 1 | -0.511485 | 0.1995    | -0.149441 | -0.318326 | 0.294312  | -0.411771 | -0.277359 | 0.450169  | 0.124063  | 0.156397  | -0.354391 |
| Cj1677 |      | 1 | -1.058293 | -0.035195 | -1.354391 | -0.670245 | -0.921117 | -0.688962 | 0.241108  | -1.534078 | 0.340163  | 0.231432  | -0.751465 |
| Cj1678 |      | 1 | -3.293359 | -0.639804 | -0.611976 | -0.037858 | -1.086507 | -1.031799 | 0.463204  | -1.505124 | -0.09542  | -0.304897 | -0.746132 |



|        |   |           |           |           |           |           |           |           |           |           |           |           |
|--------|---|-----------|-----------|-----------|-----------|-----------|-----------|-----------|-----------|-----------|-----------|-----------|
| Cj1679 | 1 | -2.37258  | -1.041269 | 0.050606  | 0.366252  | -0.037118 | -3.358454 | 0.268315  | 0.056584  | 0.318693  | 0.203765  | 0.113034  |
| Cj1680 | 1 | -0.246395 | -0.009699 | -0.427013 | 0.218471  | -0.381385 | -0.099433 | 0.076285  | -0.231244 | 0.314523  | 0.180657  | -0.230567 |
| Cj1681 | 1 | -0.005203 | -0.287184 | 0.051302  | -0.28086  | 0.180021  | -0.102063 | 0.105142  | -0.108425 | 0.013355  | -0.047816 | 0.278936  |
| Cj1682 | 1 | 0.043064  | -0.090957 | 0.046142  | -0.202074 | 0.038717  | -0.06115  | 0.225522  | 0.014641  | -0.047219 | -0.029735 | 0.292075  |
| Cj1683 | 1 | 0.026304  | 0.201383  | 0.123401  | -0.187707 | -0.005782 | -0.073545 | -0.027675 | 0.124857  | -0.136537 | 0.047818  | 0.374622  |
| Cj1684 | 1 | -0.415037 | 0.781318  | 0.26135   | -0.407172 | 0.379843  | -0.174133 | -0.347399 | 0.252658  | -0.290004 | -0.06809  | 0.097476  |
| Cj1685 | 1 | -0.000144 | -0.429343 | -0.018732 | -0.398018 | -0.069452 | -0.325901 | 0.035202  | -0.293713 | -0.25257  | -0.253601 | 0.218223  |
| Cj1686 | 1 | 0.210389  | -0.005927 | -0.04439  | 0.131853  | -0.115597 | 0.162726  | 0.271545  | -0.155373 | 0.057277  | 0.162855  | 0.04977   |
| Cj1687 | 1 | 0.497944  | 0.045024  | -0.15682  | 0.182692  | -0.105628 | 0.109561  | 0.013212  | -0.007377 | 0.056306  | 0.139339  | 0.217479  |
| Cj1688 | 1 | 0.346985  | 0.697863  | -0.035786 | 0.246834  | 0.122871  | 0.071076  | -0.182622 | 0.219463  | 0.008487  | 0.041804  | -0.064314 |
| Cj1689 | 1 | 0.203389  | -0.300804 | -0.185737 | -0.244172 | -0.214073 | 0.025454  | 0.20201   | -0.310254 | -0.079326 | -0.081766 | 0.232415  |
| Cj1690 | 1 | 0.145351  | -0.244685 | 0.045443  | -0.291239 | -0.065068 | -0.062656 | 0.122341  | -0.060548 | -0.190997 | -0.079326 | 0.220082  |
| Cj1691 | 1 | 0.298658  | -0.007957 | 0.074916  | -0.044687 | 0.183709  | -0.233786 | 0.020484  | 0.180912  | -0.42876  | 0.102591  | 0.192447  |
| Cj1692 | 1 | 0.126312  | 0.102188  | 0.273337  | 0.240986  | 0.324695  | 0.017494  | -0.151683 | 0.388686  | 0.08243   | 0.096532  | 0.097611  |
| Cj1693 | 1 | 0.08787   | -0.055291 | -0.294243 | -0.112007 | -0.249136 | -0.011152 | 0.099363  | -0.407555 | -0.007812 | 0.004609  | -0.097733 |
| Cj1694 | 1 | -0.174621 | 0.024178  | 0.313246  |           | 0.359296  | 1.186057  | -0.761702 | 0.005472  | 1.803599  | -0.264305 | 0.266517  |
| Cj1695 | 1 | -0.031504 | -0.032684 | -0.13622  | 0.179129  | -0.06673  | 0.068052  | 0.131589  | -0.03357  | 0.102591  | 0.053667  | -0.389111 |
| Cj1696 | 1 | 0.015212  | 0.423524  | 0.30229   | -0.248451 | 0.40294   | -0.148641 | -0.433428 | 0.513996  | -0.019609 | -0.158912 | 0.019773  |
| Cj1697 | 1 | 0.118493  | -0.21073  | -0.050951 | -0.212066 | -0.06673  | -0.026793 | -0.062053 | -0.176251 | -0.155695 | -0.038006 | 0.107554  |
| Cj1698 | 1 | -0.005493 | 0.024178  | 0.063779  | -0.120765 | -0.115129 | 0.056445  | 0.110363  | -0.102837 | -0.072483 | -0.032684 | -0.176088 |
| Cj1699 | 1 | 0.1133    | -0.12422  | 0.27274   | -0.046027 | 0.185486  | -0.259806 | -0.142258 | 0.27035   | -0.360675 | 0.008343  | 0.087191  |
| Cj1700 | 1 | -0.014208 | -0.007522 | -0.360305 | 0.236462  | -0.279109 | 0.10742   | -0.099587 | -0.546667 | 0.243913  | 0.127897  | -0.627271 |
| Cj1701 | 1 | -0.025911 | -0.015958 | -0.327348 | -0.262746 | -0.265691 | -0.078868 | -0.122491 | -0.431481 | -0.046176 | 0.069702  | -0.014791 |
| Cj1702 | 1 | 0.043484  | -0.236503 | 0.124063  | -0.058894 | 0.166715  | 0.070939  | 0.050606  | 0.079156  | -0.131471 | 0.132116  | 0.126576  |
| Cj1703 | 1 | 0.026446  | -0.180332 | -0.177882 | -0.016103 | 0.044884  | 0.000144  | -0.001443 | -0.109048 | -0.115285 | 0.037312  | 0.224534  |
| Cj1704 | 1 | 0.066399  | 0.351967  | 0.054918  | -0.312402 | 0.299948  | -0.684086 | -0.389111 | 0.352871  | -0.237524 | -0.07552  | -0.069149 |
| Cj1705 | 1 | 0.037171  | -0.185573 | 0.189287  | 0.518938  | 0.379954  |           | -1.174947 | 0.030265  |           |           | -2.297608 |
| Cj1706 | 1 | -0.100206 | -0.135903 | 0.051302  | 0.149389  | 0.072449  | -0.043497 | 0.017494  | 0.058109  | -0.161492 | -0.024883 | 0.178109  |
| Cj1707 | 1 | 0.028003  | 0.052416  | 0.267476  | -0.144329 | 0.260989  | -0.145286 | -0.182786 | 0.284988  | -0.248451 | -0.174459 | -0.005782 |
| Cj1708 | 1 | -0.015958 | 0.016068  | -0.34172  | 0.182057  | -0.183441 | 0.063641  | -0.148961 | -0.338433 | 0.275484  | 0.091937  | -0.408704 |
| Cj1709 | 1 | -0.153286 | -0.290356 | -0.028999 | -0.693388 | 0.1644    | 0.139339  | -0.157946 | -0.100515 | -0.455614 | -0.116848 | -0.357899 |
| Cj1710 | 1 | -0.117005 | 0.026021  | -0.308645 | 0.351176  | -0.566613 | 0.286881  | 0.369941  | -0.32916  | 0.398569  | 0.217603  | -0.448902 |
| Cj1711 | 1 | 0.012497  | 0.019773  | -0.076737 | 0.243547  | -0.067788 | -0.004769 | 0.047259  | 0.05172   | 0.267716  | 0.235114  | 0.036327  |
| Cj1712 | 1 | -0.09111  | 0.008774  | 0.018492  | 0.341986  | 0.117695  | 0.131458  | 0.03337   | 0.265917  | 0.51248   | 0.250477  | -0.03357  |
| Cj1713 | 1 | -0.003756 | -0.201908 | 0.000289  | -2.098506 | 0.11023   | -0.442811 | -0.223812 | -0.105473 | -2.691523 | -0.030914 | -0.232091 |

|        |   |           |           |           |           |           |           |           |           |           |           |           |
|--------|---|-----------|-----------|-----------|-----------|-----------|-----------|-----------|-----------|-----------|-----------|-----------|
| Cj1714 | 1 | -0.030325 | 0.004322  | -0.173157 | 0.077653  | -0.156016 | 0.249142  | 0.180275  | -0.059345 | 0.173255  | 0.155361  | 0.046421  |
| Cj1715 | 1 | 0.038717  | 0.002018  | -0.36736  | 0.210888  | -0.550043 | 0.015069  | 0.183709  | -0.387412 | 0.432959  | 0.225645  | -0.079326 |
| Cj1716 | 1 | 0.095317  | 0.430606  | -0.085895 | 0.175173  | 0.145873  | 0.122739  | -0.038303 | 0.181929  | 0.397036  | 0.274172  | 0.028145  |
| Cj1717 | 1 | 0.219215  | 0.129876  | 0.162855  | 0.591967  | 0.240009  | -1.029146 | -0.756818 | -0.093725 |           | -0.702046 | -0.028852 |
| Cj1718 | 1 | -0.075976 | 0.055473  | 0.170822  | 0.0229    | 0.1149    | -0.13005  | 0.056306  | 0.076696  | -0.12202  | -0.060247 | 0.133827  |
| Cj1719 | 1 | -0.143054 | 0.211261  | 0.270708  | -0.035343 | 0.463518  | -0.152484 | -0.297786 | 0.286053  | -0.157303 | -0.082072 | 0.100439  |
| Cj1720 | 1 | 0.301939  | 0.906275  | 0.351515  | -0.003177 | 0.529871  | -1.169745 | -3.943416 | 0.43776   |           | 0.280362  | 0.392207  |
| Cj1721 | 1 | -1.083447 | -0.775219 | -0.037118 | -0.43226  | 0.142479  | -3.303294 | -2.469929 | -0.047368 | -0.302404 | -0.107959 | 0.155361  |
| Cj1722 | 1 | -1.924125 | -0.738409 | -0.443791 | 0.147046  | -0.522634 | -2.179188 | -1.803897 | -0.273169 | 0.102994  | 0.066399  | 0.131721  |
| Cj1723 | 1 | -1.455614 | 0.006765  | -0.069906 | 0.240986  | -0.110916 | -1.394032 | -1.173319 | 0.203765  | 0.163628  | 0.010207  | 0.159629  |
| Cj1724 | 1 | -0.41523  | -0.011443 | -0.171044 | 0.450485  | -0.444969 | -0.249994 | 0.134089  | -0.21843  | 0.369941  | 0.24184   | -0.485398 |
| Cj1725 | 1 | -2.508814 | -0.045729 | -0.530531 | 0.041944  | -0.93126  | 0.137372  | 0.161565  | -0.789861 | 0.077516  | 0.101919  | -0.094187 |
| Cj1726 | 1 | -3.32771  | -0.021658 | -0.271426 | 0.292311  | -0.5664   | 0.291957  | 0.364797  | -0.195781 | 0.113567  | 0.015926  | -0.102063 |
| Cj1727 | 1 | -1.8847   | 0.004034  | 0.098689  | 0.24184   | -0.050652 | 0.256528  | 0.208268  | 0.295841  | 0.268434  | -0.032831 | 0.396269  |
| Cj1728 | 1 | -0.297608 | 0.432425  | 0.182692  | -0.565332 | 0.345169  | -0.413307 | -0.104232 | 0.563549  | -0.321748 | -0.206229 | 0.253142  |
| Cj1729 | 1 | -0.592049 | -0.862759 | 0.054779  |           | 0.089634  | -2.519528 | -1.200913 | -0.098197 | -0.180659 | -1.883635 | -0.852042 |
| Cj1730 | 1 | 0.243791  | 0.064193  | -0.362343 | 0.245131  | -1.121549 | 0.288181  | 0.272262  | -0.831615 | 0.278223  | 0.160791  | 0.264476  |
| Cj1731 | 1 | -0.12422  | 0.586789  | 0.317999  | 1.802772  | 0.52095   | 0.624709  | -4.640254 | 0.319965  | 1.691266  | 4.761785  | 0.20989   |
