# Supplementary material
Source: PubMed Central journal article supplement (PMC133449)
Supplement: gb-2002-3-11-research0065-s6.pdf [file gb-2002-3-11-research0065-s6.pdf]

| CJID    | NAME         | GWEIGHT | 81116 | 81176 | G1 | P1 | P2 | P3 | P4 | PHLS01 | PHLS02 | PHLS03 | X  |
|---------|--------------|---------|-------|-------|----|----|----|----|----|--------|--------|--------|----|
| EWEIGHT |              |         |       |       |    |    |    |    |    |        |        |        |    |
| Cj0001  | Cj0001, dn   | 1       | 1     | 1     | 1  | 1  | 1  | 1  | 1  | 1      | 1      | 1      | 1  |
| Cj0002  | Cj0002, dn   | 1       | 1     | 1     | 0  | 1  | 1  | 0  | 1  | 0      | 1      | 1      | 1  |
| Cj0003  | Cj0003, gy   | 1       | 1     | 1     | 0  | 1  | 1  | 0  | 1  | 0      | 1      | 1      | 1  |
| Cj0004  |              | 1       | 1     | 1     | 0  | 1  | 1  | 0  | 1  | 0      | 1      | 1      | 1  |
| Cj0005  |              | 1       | 1     | 1     | 1  | 1  | 1  | 0  | 1  | 1      | 1      | 1      | 1  |
| Cj0006  | Cj0006, prc  | 1       | 1     | 1     | 0  | 1  | 1  | 0  | 1  | 0      | 1      | 1      | 1  |
| Cj0007  | Cj0007, glt  | 1       | 0     | 1     | 0  | 1  | 1  | 0  | 1  | 0      | 1      | 1      | 1  |
| Cj0008  | Cj0008, un   | 1       | -1    | 1     | -1 | 0  | 0  | 0  | -1 | -1     | 1      | 1      | -1 |
| Cj0009  | Cj0009, glt  | 1       | 0     | 1     | 1  | 1  | 0  | 0  | 1  | 0      | 0      | 1      | 1  |
| Cj0010  |              | 1       | 1     | 1     | 0  | 1  | 1  | 1  | 1  | 1      | 1      | 1      | 1  |
| Cj0011  |              | 1       | 1     | 1     | -1 | 1  | 1  | 0  | 1  | -1     | 1      | 1      | 1  |
| Cj0012  |              | 1       | 0     | 1     | 0  | 1  | 1  | 0  | 1  | 1      | 1      | 1      | 0  |
| Cj0013  | Cj0013, ilvl | 1       | 1     | 1     | 0  | 1  | 1  | 0  | 1  | -1     | 1      | 1      | 0  |
| Cj0014  |              | 1       | 1     | 0     | 1  | 1  | 1  | 1  | 1  | 1      | 1      | 1      | 1  |
| Cj0015  |              | 1       | 1     | 1     | 0  | 1  | 1  | 1  | 1  | 1      | 1      | 1      | 1  |
| Cj0016  | Cj0016, po   | 1       | 1     | 1     | 1  | 1  | 1  | 1  | 1  | 1      | 0      | 1      | 1  |
| Cj0017  |              | 1       | 1     | 1     | 1  | 1  | 1  | 1  | 1  | 1      | 1      | 1      | 1  |
| Cj0018  |              | 1       | 1     | 1     | 0  | 1  | 1  | 1  | 1  | 1      | 1      | 1      | 1  |
| Cj0019  |              | 1       | 1     | 1     | 0  | 1  | 1  | 0  | 1  | 1      | 1      | 1      | 1  |
| Cj0020  |              | 1       | 1     | 1     | 1  | 1  | 1  | 1  | 1  | 1      | 1      | 0      | 1  |
| Cj0021  |              | 1       | 1     | 1     | 1  | 1  | 1  | 1  | -1 | 1      | 1      | 1      | 1  |
| Cj0022  |              | 1       | 1     | 1     | 0  | 1  | 1  | 0  | 1  | 1      | 1      | 1      | 1  |
| Cj0023  | Cj0023, pu   | 1       | 1     | 0     | 1  | 0  | 0  | 1  | 1  | 1      | -1     | 0      | 1  |
| Cj0024  | Cj0024, nrc  | 1       | 1     | 1     | 0  | 1  | 1  | 1  | 1  | 0      | 1      | 1      | 0  |
| Cj0025  |              | 1       | 1     | 0     | 1  | 1  | 1  | 0  | 1  | 1      | 1      | 0      | 1  |
| Cj0026  |              | 1       | 1     | 1     | 0  | 0  | 1  | 0  | 1  | 1      | 1      | 1      | 1  |
| Cj0027  | Cj0027, py   | 1       | 1     | 1     | 0  | 0  | 1  | 0  | 1  | 0      | 1      | 1      | 1  |
| Cj0028  | Cj0028, rec  | 1       | 1     | 1     | 0  | 1  | 1  | 0  | 1  | -1     | 1      | 1      | 0  |
| Cj0029  | Cj0029, an   | 1       | 0     | 0     | 0  | 0  | 0  | 0  | 1  | 0      | 0      | 0      | 1  |
| Cj0030  | Cj0030, un   | 1       | -1    | 0     | 0  | 1  | 1  | 1  | 1  | 1      | 1      | 1      | 1  |
| Cj0031  | Cj0031, prc  | 1       | 1     | 1     | 1  | 1  | 1  | 1  | 1  | 1      | 1      | 1      | 1  |
| Cj0032  | Cj0032, prc  | 1       | -1    | 1     | 1  | 1  | -1 | 1  | 0  | 1      | 1      | 0      | -1 |
| Cj0033  | Cj0033, prc  | 1       | -1    | 0     | 1  | 1  | -1 | 0  | -1 | 1      | -1     | -1     | -1 |

[illegible]



[illegible]

[illegible]

[illegible]

[illegible]

[illegible]

|        |             |   |   |   |   |   |    |   |    |    |    |   |   |
|--------|-------------|---|---|---|---|---|----|---|----|----|----|---|---|
| Cj0699 |             | 1 | 1 | 1 | 0 | 1 | 0  | 1 | 1  | -1 | 1  | 1 | 0 |
| Cj0700 | Cj0700, un  | 1 | 1 | 1 | 1 | 1 | 1  | 1 | 1  | 1  | 1  | 1 | 1 |
| Cj0701 | Cj0701, prc | 1 | 0 | 1 | 1 | 1 | 1  | 1 | 1  | 1  | 1  | 1 | 1 |
| Cj0702 | Cj0702, pu  | 1 | 1 | 1 | 1 | 1 | 1  | 1 | 1  | 1  | 1  | 1 | 1 |
| Cj0703 | Cj0703, un  | 1 | 1 | 1 | 0 | 1 | 1  | 1 | 1  | 1  | 1  | 1 | 1 |
| Cj0704 | Cj0704, gly | 1 | 1 | 1 | 1 | 1 | 0  | 1 | 1  | 0  | 1  | 1 | 1 |
| Cj0705 | Cj0705, un  | 1 | 0 | 1 | 1 | 1 | 1  | 1 | 1  | 0  | 1  | 1 | 0 |
| Cj0706 | Cj0706, un  | 1 | 1 | 1 | 0 | 1 | 1  | 1 | 1  | 1  | 1  | 1 | 1 |
| Cj0707 | Cj0707, kdl | 1 | 1 | 1 | 1 | 1 | 1  | 0 | 1  | 1  | 1  | 1 | 1 |
| Cj0708 | Cj0708, po  | 1 | 1 | 1 | 1 | 1 | 1  | 1 | 1  | 0  | 1  | 1 | 0 |
| Cj0709 | Cj0709, ffh | 1 | 1 | 1 | 0 | 1 | -1 | 1 | 1  | -1 | 1  | 1 | 0 |
| Cj0710 | Cj0710, rps | 1 | 1 | 1 | 0 | 1 | 0  | 1 | 1  | -1 | 1  | 1 | 1 |
| Cj0711 | Cj0711, un  | 1 | 1 | 1 | 0 | 1 | 0  | 1 | 1  | 0  | 1  | 1 | 0 |
| Cj0712 | Cj0712, rin | 1 | 1 | 1 | 1 | 1 | 0  | 1 | 1  | 0  | 1  | 1 | 1 |
| Cj0713 | Cj0713, trn | 1 | 1 | 1 | 0 | 1 | 0  | 1 | 1  | 0  | 1  | 1 | 1 |
| Cj0714 | Cj0714, rpl | 1 | 1 | 1 | 1 | 1 | 1  | 1 | 1  | 1  | 1  | 1 | 1 |
| Cj0715 | Cj0715, tra | 1 | 1 | 1 | 0 | 1 | 1  | 1 | 1  | 1  | 1  | 1 | 1 |
| Cj0716 | Cj0716, prc | 1 | 1 | 1 | 1 | 1 | 1  | 1 | 1  | 1  | 1  | 1 | 1 |
| Cj0717 | Cj0717, un  | 1 | 1 | 1 | 1 | 1 | 1  | 1 | 1  | 1  | 1  | 1 | 1 |
| Cj0718 | Cj0718, dn  | 1 | 1 | 1 | 1 | 1 | 1  | 0 | 1  | 1  | 0  | 1 | 1 |
| Cj0719 |             | 1 | 1 | 1 | 1 | 1 | 1  | 1 | 1  | 1  | 1  | 1 | 1 |
| Cj0720 |             | 1 | 1 | 1 | 1 | 1 | 1  | 1 | 1  | 1  | 1  | 1 | 1 |
| Cj0721 |             | 1 | 1 | 1 | 1 | 1 | 1  | 1 | 1  | 1  | 1  | 1 | 1 |
| Cj0722 |             | 1 | 1 | 1 | 0 | 1 | 1  | 1 | 1  | 1  | 1  | 1 | 1 |
| Cj0723 |             | 1 | 1 | 1 | 0 | 1 | 0  | 1 | -1 | 1  | 1  | 1 | 0 |
| Cj0724 | Cj0724, un  | 1 | 1 | 1 | 1 | 1 | 1  | 1 | 1  | 1  | 1  | 1 | 1 |
| Cj0725 |             | 1 | 1 | 1 | 1 | 1 | 1  | 1 | 1  | 1  | 1  | 1 | 1 |
| Cj0726 |             | 1 | 1 | 1 | 1 | 1 | 1  | 1 | 1  | 1  | 1  | 1 | 1 |
| Cj0727 | Cj0727, prc | 1 | 1 | 1 | 1 | 1 | 1  | 0 | 1  | 1  | 1  | 1 | 1 |
| Cj0728 | Cj0728, prc | 1 | 1 | 1 | 1 | 1 | 1  | 1 | 1  | 1  | 1  | 1 | 1 |
| Cj0729 | Cj0729, un  | 1 | 1 | 1 | 0 | 1 | 0  | 1 | 0  | 1  | 1  | 1 | 1 |
| Cj0730 | Cj0730, prc | 1 | 1 | 1 | 0 | 1 | 1  | 1 | 1  | 1  | -1 | 1 | 1 |
| Cj0731 | Cj0731, prc | 1 | 1 | 1 | 1 | 1 | 1  | 1 | 1  | 1  | -1 | 1 | 1 |
| Cj0732 | Cj0732, prc | 1 | 1 | 1 | 1 | 1 | 1  | 1 | 1  | 1  | 1  | 1 | 1 |
| Cj0733 | Cj0733, un  | 1 | 1 | 1 | 1 | 1 | -1 | 1 | 1  | 1  | 0  | 0 | 1 |

[illegible]

Cj1084  
Cj1085  
Cj1086  
Cj1087  
Cj1088  
Cj1089  
Cj1090  
Cj1091  
Cj1092  
Cj1093  
Cj1094  
Cj1095  
Cj1096  
Cj1097  
Cj1098  
Cj1099  
Cj1100  
Cj1101  
Cj1102  
Cj1103  
Cj1104  
Cj1105  
Cj1106  
Cj1107  
Cj1108  
Cj1109  
Cj1110  
Cj1111  
Cj1112  
Cj1113  
Cj1114  
Cj1115  
Cj1116  
Cj1117  
Cj1118

Cj1095, prc

Cj1097, prc

Cj1098, py

Cj1099, prc

Cj1100, un

Cj1101, prc

Cj1102, tru

Cj1103, csi

Cj1104, un

Cj1105, srr

Cj1106, po

Cj1107, un

Cj1108, clp

Cj1109, aa

Cj1113, un

[illegible]





[illegible]
