# Supplementary material
Source: PubMed Central journal article supplement (PMC133449)
Supplement: gb-2002-3-11-research0065-s8.pdf [file gb-2002-3-11-research0065-s8.pdf]

| UID     | NAME      | GWEIGHT | SS1     | G50       | 314       | H34     | J99     | AR32      |
|---------|-----------|---------|---------|-----------|-----------|---------|---------|-----------|
| EWEIGHT |           |         | 1       | 1         | 1         | 1       | 1       | 1         |
| HPY0001 | 14249 HPC | 1       | -0.085  | 0.446667  | 0.043333  | 0.13    | 0.395   | 0.256667  |
| HPY0002 | 14250 HPC | 1       | -0.34   | -0.066333 | 0.016667  | -0.37   | 0.2     | 0.267333  |
| HPY0003 | 14251 HPC | 1       |         | -0.422667 | -0.25     | -0.29   | 0.107   | -0.12     |
| HPY0004 | 14252 HPC | 1       | -0.22   | 0.133333  | 0.016667  | -0.025  | 0.35    | 0.053667  |
| HPY0005 | 14253 HPC | 1       | -0.16   | 0.036667  | 0.086667  | 0.02    | 0.075   | 0.533333  |
| HPY0006 | 14254 HPC | 1       | -0.03   | 0.63      | 0.22      | 0.405   | -0.25   | 0.07      |
| HPY0007 | 14255 HPC | 1       | 0.22    | -0.237    | -0.234333 | 0.4     | 0.08    | -0.132    |
| HPY0009 | 14257 HPC | 1       | -1.41   | 0.203333  | 0.061667  | -0.055  | 0.045   | 0.397333  |
| HPY0010 | 14258 HPC | 1       | -0.042  | 0.256667  | -0.036667 | 0.32    | 0.075   | 0.404667  |
| HPY0012 | 14260 HPC | 1       | -0.162  | 0.15      | -0.067667 | 0.055   | 0.39    | 0.493333  |
| HPY0013 | 14261 HPC | 1       | -0.0555 | -0.057667 | 0.02      | 0.025   | 0.34    | 0.464667  |
| HPY0014 | 14262 HPC | 1       | -0.068  | 0.07      | 0.07      | -0.09   | 0.3505  | 0.1715    |
| HPY0015 | 14293 HPC | 1       | 0.025   | 0.21      | -0.016667 | 0.55    | 0.17    | 0.45      |
| HPY0016 | 14294 HPC | 1       | 0.92    | 0.429667  | 0.14      | -0.005  | -0.095  | 0.745     |
| HPY0017 | 14295 HPC | 1       | -0.515  | -0.156667 | -0.12     | 0.32    | -0.175  | 0.255     |
| HPY0018 | 14296 HPC | 1       | -0.2765 | 0.285667  | 0.129     | 0.12    | 0.455   | 0.477667  |
| HPY0019 | 14297 HPC | 1       | 0.0435  | 0.24      | 0.183333  | 0.17    | 0.46    | 0.625     |
| HPY0020 | 14298 HPC | 1       | 0.105   | 0.203333  | 0.176667  | 0.24    | 0.11    | 0.256667  |
| HPY0021 | 14299 HPC | 1       | 0.18    | 0.453333  | -0.036667 | 0.165   | -0.465  | 0.146     |
| HPY0022 | 14300 HPC | 1       | -0.02   | 0.28      | -0.276667 | 0.165   | 0.055   | -0.071333 |
| HPY0023 | 14301 HPC | 1       | -0.62   | -0.815    | -0.423333 | -0.29   | -0.62   | -0.435    |
| HPY0024 | 14302 HPC | 1       | -0.219  | 1.599     | -0.08     | 0.77    | -0.2675 | 0.351     |
| HPY0025 | 14303 HPC | 1       | -0.005  | -0.896667 | -0.91     | 0.261   | -1.48   | -0.679333 |
| HPY0026 | 14304 HPC | 1       | 0.32    | 0.483333  | 0.343333  | 0.185   | 0.355   | 0.503333  |
| HPY0027 | 14305 HPC | 1       | -0.26   | -0.009    | 0.043333  | 0.849   | 0.305   | 0.396667  |
| HPY0028 | 14306 HPC | 1       | 0.11    | 0.36      | 0.04      | 0.33    | 0.235   | -0.006667 |
| HPY0029 | 14307 HPC | 1       | -0.195  | 0.336667  | 0.263333  | 0.43    | 0.065   | 0.565     |
| HPY0030 | 14308 HPC | 1       | -1.385  | -0.643333 | -0.493333 | -1.57   | -1.87   | 0.2       |
| HPY0031 | 14309 HPC | 1       | 0.1495  | 0.143333  | 0.133333  | 0.428   | 0.225   | 0.428     |
| HPY0032 | 14310 HPC | 1       | 0.35    | 0.608667  | 0.45      | 0.64    | -1.955  | -0.745667 |
| HPY0033 | 14311 HPC | 1       | 0.334   | 0.506667  | 0.426333  | 0.64    | 0.025   | 0.379333  |
| HPY0034 | 14312 HPC | 1       | -0.335  | -0.103333 | -0.08     | -0.53   | 0.345   | 0.073333  |
| HPY0035 | 14313 HPC | 1       | -0.56   | -0.083333 | -0.056667 | -0.06   | 0.62    | 0.376667  |
| HPY0036 | 14314 HPC | 1       | 0.313   | 0.21      | 0.432     | 0.38    | -0.04   | 0.166667  |
| HPY0037 | 14315 HPC | 1       | -0.032  | 0.093333  | 0.080667  | 0.14    | -0.04   | 0.043333  |
| HPY0038 | 14316 HPC | 1       | 0.28    | 0.33      | 0.196667  | 0.15    | 0.18    | 0.221667  |
| HPY0039 | 14317 HPC | 1       | -0.1965 | -0.02     | -0.176667 | 0.068   | 0.3765  | 0.223333  |
| HPY0040 | 14318 HPC | 1       | 0.2735  | 0.086667  | 0.075     | 0.18    | 0.075   | 0.093333  |
| HPY0041 | 14319 HPC | 1       | -0.253  | 0.516667  | 0.263333  | 0.44    | 0.16    | 0.144     |
| HPY0042 | 14320 HPC | 1       | 0.185   | 0.313333  | 0.086667  | 0.355   | 0.155   | -0.19     |
| HPY0043 | 14321 HPC | 1       | 0.08    | 0.37      | -0.006667 | 0.6     | 0       | 0.42      |
| HPY0044 | 14322 HPC | 1       | 0.29    | 0.343333  | 0.223333  | 0.24    | 0.21    | 0.382333  |
| HPY0045 | 14323 HPC | 1       | -0.07   | -0.026667 | 0.076667  | 0.14    | 0.015   | 0.083333  |
| HPY0047 | 14325 HPC | 1       | -0.029  | -0.076667 | 0.127333  | -0.43   | 0.165   | 0.193333  |
| HPY0048 | 14326 HPC | 1       | -0.75   | 0.07      | -0.176667 | -0.07   | -0.2    | -0.1      |
| HPY1778 | 16056 HPC | 1       | -0.0715 | 0.446667  | 0.265     | 0.5255  | 0.345   | 0.384     |
| HPY0050 | 14328 HPC | 1       | -0.532  | -0.043333 | -0.036667 | 0.13    | -0.32   | 0.466     |
| HPY0051 | 14329 HPC | 1       | 0.06    | 0.78      | 0.746667  | 1.265   | -1.72   | -0.854667 |
| HPY0052 | 14330 HPC | 1       | -3.2245 | 0.453333  | 0.604333  | 0.705   | -2.09   | -1.003333 |
| HPY0053 | 14331 HPC | 1       | -1.535  | -0.983333 | -0.973333 | -1.6455 | -2.365  | 0.697667  |
| HPY0054 | 14332 HPC | 1       | -1.76   | -1.19     | -1.17     | -1.3035 | -2.225  | 0.875     |
| HPY1591 | 15869 JHF | 1       | -1.4875 | -0.483333 | -0.096667 | -0.465  | 0.925   | -0.073333 |
| HPY1743 | 16021 JHF | 1       | -2.6305 | 0.164333  | 0.41      | 0.49    | 1.32    | 0.856667  |

|         |       |     |   |         |           |           |         |         |           |
|---------|-------|-----|---|---------|-----------|-----------|---------|---------|-----------|
| HPY1593 | 15871 | JHF | 1 | -3.017  | -0.143333 | 0.406667  | 0.463   | 0.995   | 0.5775    |
| HPY0055 | 14333 | HPC | 1 | 0.2025  | 0.343333  | 0.293     | 0.3     | 0.195   | 0.3       |
| HPY1759 | 16037 | HPC | 1 | -0.1555 | -0.303333 | -0.096667 | -0.401  | 0.105   | 0.375667  |
| HPY0057 | 14335 | HPC | 1 | -0.1845 | -0.511333 | -0.47     | -0.7475 | -0.5    | -0.338    |
| HPY0058 | 14336 | HPC | 1 | 0.165   | -0.376667 | -0.113333 | -0.629  | -0.27   | -0.2605   |
| HPY0059 | 14337 | HPC | 1 | -0.755  | 0.52      | 0.3       | 0.255   | -0.89   | -0.473333 |
| HPY0060 | 14338 | HPC | 1 | -0.789  | -0.719667 | -0.09     | -0.734  | -1.095  | -0.58     |
| HPY0061 | 14339 | HPC | 1 | -0.0455 | 0.043333  | -0.293333 | -0.026  | -0.62   | -0.2085   |
| HPY0062 | 14340 | HPC | 1 | -1.5465 | -0.326667 | -0.304    | 0       | -0.07   | -0.014333 |
| HPY0063 | 14341 | HPC | 1 | -0.25   | -0.196667 | -0.136667 | -0.4355 | -1.095  | -0.367    |
| HPY1688 | 15966 | HPC | 1 | -0.295  | -0.47     | -0.26     | 0.255   | -0.785  | -0.436667 |
| HPY0065 | 14343 | HPC | 1 | -0.13   | 0.1       | 0.103333  | -0.1    | -0.745  | -0.435    |
| HPY0066 | 14344 | HPC | 1 | 0.01    | 0.04      | 0.106667  | -0.67   | -0.72   | -0.155667 |
| HPY0067 | 14345 | HPC | 1 | 0.259   | -0.04     | -0.076667 | -1.09   | -0.055  | 0.029333  |
| HPY0068 | 14346 | HPC | 1 | -0.039  | -0.13     | -0.05     | -0.161  | 0.6     | 0.191667  |
| HPY0069 | 14347 | HPC | 1 | 0.206   | 0.173333  | 0.184667  | -0.33   | 0.29    | 0.526667  |
| HPY0070 | 14348 | HPC | 1 | 0.135   | -0.203333 | 0.266667  | 0.15    | 0.61    | 0.426667  |
| HPY1699 | 15977 | HPC | 1 | 0.349   | 0.36      | -0.062    | 0.22    | -0.0945 | 0.080667  |
| HPY1729 | 16007 | HPC | 1 | 0.1165  | 0.14      | 0.426667  | 0.515   | 0.415   | 0.746     |
| HPY0073 | 14351 | HPC | 1 | 0.15    | 0.186667  | 0.283333  | 0.354   | 0.36    | 0.653667  |
| HPY0074 | 14352 | HPC | 1 | 0.335   | 0.37      | 0.23      | 0.195   | 0.075   | 0.202333  |
| HPY0075 | 14353 | HPC | 1 | 0.2315  | 0.339667  | 0.278667  | 0.2005  | 0.245   | 0.398     |
| HPY0076 | 14354 | HPC | 1 | 1.06    | 0.165     | 0.102667  | -0.155  | 0.28    | 0.206667  |
| HPY0077 | 14355 | HPC | 1 | -0.205  | 0.286667  | 0.07      | 0.34    | 0.235   | 0.4865    |
| HPY0078 | 14356 | HPC | 1 | 0.14    | -0.673333 | -0.36     | 0.1355  | -0.195  | 0.056667  |
| HPY0079 | 14357 | HPC | 1 | 0.525   | -0.503333 | -0.253333 | 0.055   | -0.805  | 0.45      |
| HPY1804 | 16082 | HPC | 1 | 0.071   | 0.523333  | 0.228     | 0.405   | -0.245  | -0.041333 |
| HPY0081 | 14359 | HPC | 1 |         | -0.881    | -0.273667 | -0.89   | -1.91   | -2.064    |
| HPY0082 | 14360 | HPC | 1 | -0.029  | 0.23      | 0.176667  | 0.33    | 0.34    | 0.241333  |
| HPY0083 | 14361 | HPC | 1 | 0.485   | 0.106667  | 0.21      | -0.075  | 0.475   | 0.193333  |
| HPY0084 | 14362 | HPC | 1 | 0.5285  | 0.416667  | 0.182333  | 0.295   | 0.55    | 0.266667  |
| HPY0085 | 14363 | HPC | 1 | 0.138   | -0.288    | -0.083333 | 0.03    | -0.045  | -0.27     |
| HPY0086 | 14364 | HPC | 1 | 0.01    | 0.44      | 0.12      | -0.075  | 0.355   | 0.123333  |
| HPY0087 | 14365 | HPC | 1 | -0.0915 | 0.223333  | 0.1       | 0.07    | -0.015  | 0.505     |
| HPY0088 | 14366 | HPC | 1 | 0.19    | 0.123333  | 0.223333  | 0.0695  | 0.25    | 0.491333  |
| HPY0089 | 14367 | HPC | 1 | -0.015  | -0.073333 | 0.08      | 0.3075  | 0.08    | 0.411     |
| HPY0090 | 14368 | HPC | 1 | -0.03   | -0.18     | 0.11      | -0.1    | 0.395   | 0.303333  |
| HPY0091 | 14369 | HPC | 1 | 0.3395  | -1.516667 | -0.940333 | -1.79   | -0.085  | -1.35     |
| HPY0093 | 14371 | HPC | 1 | -0.1265 | -0.043333 | -0.36     | -0.2915 | -0.115  | 0.174667  |
| HPY0094 | 14372 | HPC | 1 | -0.115  | -0.357333 | -0.21     | -0.765  | -0.09   | 0.23      |
| HPY0095 | 14373 | HPC | 1 | 0.29    | 0.133333  | 0.169333  | 0.06    | 0.23    | 0.12      |
| HPY0096 | 14374 | HPC | 1 | -0.6775 | 0.236667  | -0.19     | 0.4995  | 0.3     | 0.037     |
| HPY0097 | 14375 | HPC | 1 | 0.5295  | -0.043333 | 0.096667  | 0.3965  | -0.375  | 0.226333  |
| HPY0098 | 14376 | HPC | 1 | -0.18   | -0.261333 | -0.040333 | -0.054  | -0.05   |           |
| HPY0099 | 14377 | HPC | 1 | 0.145   | -0.003333 | 0.09      | 0.13    | 0.225   | 0.226667  |
| HPY0100 | 14378 | HPC | 1 | -0.21   | -0.246667 | -2.31E-18 | 0.065   | 0.2     | 0.33      |
| HPY0101 | 14379 | HPC | 1 | -0.425  | 0.069333  | 0.14      | 0.55    | -0.04   | 0.386667  |
| HPY1695 | 15973 | HPC | 1 | -0.17   | -0.06     | -0.063333 | -0.265  | 0.11    | 0.256667  |
| HPY1774 | 16052 | HPC | 1 | -0.44   | 0.090667  | -0.03     | 0.31    | 0.22    | 0.293333  |
| HPY0104 | 14382 | HPC | 1 | -0.185  | 0.32      | 0.1       | -0.075  | -0.06   | 0.21      |
| HPY0105 | 14383 | HPC | 1 | -0.245  | 0.236667  | -0.073333 | 0.24    | 0.005   | 0.33      |
| HPY0106 | 14384 | HPC | 1 | 0.27    | 0.25      | 0.288667  | 0.136   | -0.19   | 0.369333  |
| HPY0107 | 14385 | HPC | 1 | 0.24    | 0.506667  | 0.009667  | -0.0465 | 0.035   | 0.118     |
| HPY0109 | 14387 | HPC | 1 | 0.135   | 0.443333  | 0.216667  | 0.165   | 0.22    | 0.39      |
| HPY0110 | 14388 | HPC | 1 | 0.105   | -0.053333 | 0.063333  | -0.145  | 0.33    | 0.223333  |

|         |       |     |   |         |           |           |         |        |           |
|---------|-------|-----|---|---------|-----------|-----------|---------|--------|-----------|
| HPY0111 | 14389 | HPC | 1 | -0.011  | -0.14     | -0.177667 | -0.01   | 0.215  | -0.094333 |
| HPY0112 | 14390 | HPC | 1 | 0.3245  | 0.086667  | 0.034     | 0.12    | 0.13   | 0.106333  |
| HPY0113 | 14391 | HPC | 1 | -0.225  | 0.45      | 0.183333  | 0.93    | 0.335  | -0.143333 |
| HPY1793 | 16071 | HPC | 1 | -0.2885 | -0.006333 | -0.043333 | 0.293   | 0.105  | 0.1845    |
| HPY0115 | 14393 | HPC | 1 | 0.035   | 0.376667  | 0.276667  | 0.365   | 0.385  | 0.363333  |
| HPY0116 | 14394 | HPC | 1 | 0.09    | 0.126667  | 0.106667  | 0.035   | 0.3    | 0.24      |
| HPY0117 | 14395 | HPC | 1 | -0.145  | 0.07      | 0.07      | 0.06    | 0.205  | 0.428     |
| HPY0118 | 14396 | HPC | 1 | -0.83   | 0.153333  | -0.263333 | -0.425  | -0.445 | 0.04      |
| HPY1783 | 16061 | HPC | 1 | -0.1925 | 0.356     | 0.455667  | 0.063   | -0.06  | -0.185    |
| HPY0120 | 14398 | HPC | 1 | -0.745  | 0.235     | 0.153333  | 0.14    | -0.16  | -0.72     |
| HPY0121 | 14399 | HPC | 1 | -0.136  | 0.186333  | -0.13     | 0.16    | 0.195  | -0.042    |
| HPY0122 | 14400 | HPC | 1 | 0.645   | -0.071333 | -0.013333 | 0.2405  | 0.315  | 0.469667  |
| HPY0123 | 14401 | HPC | 1 | 0.05    | 0.076667  | 0.007     | -0.0515 | 0.225  | 0.07      |
| HPY0124 | 14402 | HPC | 1 | 0.085   | 0.23      | 0.1       | 0.015   | 0.635  | 0.213333  |
| HPY0125 | 14403 | HPC | 1 | -0.06   | -0.222    | 0.076667  | 0.07    | 0.435  | -0.259667 |
| HPY0126 | 14404 | HPC | 1 | -0.355  | -0.133333 | -0.11     | -0.23   | 0.46   | 0.162667  |
| HPY0127 | 14405 | HPC | 1 | -0.105  | 0.046667  | 0.206667  | 0.005   | 0.33   | 0.236333  |
| HPY0128 | 14406 | HPC | 1 |         | 0.0065    | -0.056667 | 0.13    | -1.075 | -0.37     |
| HPY0129 | 14407 | HPC | 1 | 0.355   | -0.09     | 0.113333  | -0.1585 | -0.34  | 0.18      |
| HPY0130 | 14408 | HPC | 1 | -0.1135 | 0.403333  | 0.393333  | 0.265   | 0.095  | 0.166667  |
| HPY0132 | 14410 | HPC | 1 | -0.1    | -0.077333 | 0.04      | -0.15   | -0.005 | 0.146333  |
| HPY0133 | 14411 | HPC | 1 | 0.475   | 0.79      | 0.423333  | 0.62    | 0.38   | 0.399667  |
| HPY0134 | 14412 | HPC | 1 | 0.034   | 0.226667  | 0.216667  | 0.27    | 0.315  | 0.551333  |
| HPY0135 | 14413 | HPC | 1 | -0.529  | 0.218     | 0.102     | 0.26    | -0.01  | 0.04      |
| HPY0136 | 14414 | HPC | 1 | -0.0855 | 0.513333  | 0.39      | 0.41    | 0.39   | 0.268333  |
| HPY0137 | 14415 | HPC | 1 | -0.063  | 0.2       | 0.116667  | 0.123   | 0.225  | 0.436667  |
| HPY0138 | 14416 | HPC | 1 | -0.095  | 0.57      | 0.376667  | 0.505   | 0.355  | 0.576667  |
| HPY0139 | 14417 | HPC | 1 | 0.21    | -0.11     | 0.3       | 0.29    | 0.57   | 0.613667  |
| HPY0140 | 14418 | HPC | 1 | 0.1315  | 0.243333  | 0.113333  | 0.26    | 0.285  | 0.421333  |
| HPY0141 | 14419 | HPC | 1 | 0.248   | 0.32      | 0.17      | -0.0405 | 0.135  | 0.268333  |
| HPY0142 | 14420 | HPC | 1 | -0.17   | 0.113333  | 0.14      | 0.0765  | 0.02   | 0.332     |
| HPY0143 | 14421 | HPC | 1 | 0.345   | 0.283333  | 0.253333  | 0.12    | 0.185  | 0.21      |
| HPY0144 | 14422 | HPC | 1 | -0.588  | 0.376333  | -0.324667 | -1.91   |        | -0.26     |
| HPY0145 | 14423 | HPC | 1 | 0.3655  | 0.21      | 0.186667  | 0.4165  | 0.005  | 0.587667  |
| HPY0146 | 14424 | HPC | 1 | -0.086  | -0.535333 | -0.191333 | 0.06    | 0.106  | 0.412     |
| HPY0147 | 14425 | HPC | 1 | 0.155   | 0.24      | 0.25      | 0.25    | 0.12   | 0.387333  |
| HPY0148 | 14426 | HPC | 1 | 0.125   | 0.646667  | 0.313333  | 0.483   | 0.4    | 0.095667  |
| HPY0149 | 14427 | HPC | 1 | 0.037   | -0.02     | 0.084333  | 0.275   | -0.115 | 0.191     |
| HPY0150 | 14428 | HPC | 1 | 0.235   | -0.3      | 0.096667  | 0.009   | -0.165 | 0.251     |
| HPY0151 | 14429 | HPC | 1 | 0.265   | 0.28      | 0.26      | 0.307   | 0.13   | 0.253667  |
| HPY0152 | 14430 | HPC | 1 | -0.19   | -0.18     | -0.03     | 0.14    | 0.065  | 0.183333  |
| HPY0153 | 14431 | HPC | 1 | 1.0765  | 0.09      | 0.158667  | 0.605   | 0.32   | 0.437     |
| HPY0154 | 14432 | HPC | 1 | -0.005  | 0.146667  | 0.123333  | 0.285   | 0.25   | 0.443333  |
| HPY0155 | 14433 | HPC | 1 | 0.114   | 0.05      | 0.003333  | 0.63    | -0.04  | 0.517667  |
| HPY0156 | 14434 | HPC | 1 | -0.36   | 0.196667  | -0.06     | 0.04    | 0.18   | 0.026667  |
| HPY0157 | 14435 | HPC | 1 | 0.15    | -0.059333 | 0.07      | 0.12    | 0.295  | 0.555667  |
| HPY0158 | 14436 | HPC | 1 | 0.155   | 0.243333  | 0.381     | 0.3     | 0.1    | 0.111333  |
| HPY0159 | 14437 | HPC | 1 | -0.46   | -0.246667 | 0.01      | 0.6335  | -0.255 | -0.259667 |
| HPY0160 | 14438 | HPC | 1 | -0.635  | 0.15      | 0.15      | 0.485   | -0.285 | -0.066667 |
| HPY0161 | 14439 | HPC | 1 | -1.187  | -0.09     | -0.573333 | 0.071   | -1.295 | -1.956    |
| HPY0162 | 14440 | HPC | 1 | 0.2175  | 0.303333  | 0.08      | 0.345   | 0.36   | 0.5       |
| HPY0163 | 14441 | HPC | 1 | 0.0575  | 0.026667  | 0.133667  | 0.425   | 0.295  | 0.276667  |
| HPY0164 | 14442 | HPC | 1 | -0.155  | -0.14     | -0.153333 | -0.08   | 0.115  | 0.191     |
| HPY0165 | 14443 | HPC | 1 | -0.085  | 0.206667  | -0.036667 | 0.135   | 0.455  | 0.33      |
| HPY0166 | 14444 | HPC | 1 | 0.0435  | 0.016667  | 0.093667  | -0.01   | 0.515  | 0.56      |

|         |       |     |   |         |           |           |         |        |           |
|---------|-------|-----|---|---------|-----------|-----------|---------|--------|-----------|
| HPY0167 | 14445 | HPC | 1 | -0.0925 | -0.006667 | -0.16     | 0.011   | -0.365 | 0.1125    |
| HPY0168 | 14446 | HPC | 1 | 0.068   | -1.226    | -0.744    | -0.14   | -0.33  | -0.6875   |
| HPY0169 | 14447 | HPC | 1 | -0.0915 | 0.116667  | 0.12      | 0.085   | 0.135  | 0.53      |
| HPY0170 | 14448 | HPC | 1 | -0.0565 | 0.17      | 0.01      | 0.145   | 0.14   | 0.36      |
| HPY0171 | 14449 | HPC | 1 | 0.03    | 0.193333  | 0.153333  | 0.13    | 0.315  | 0.373667  |
| HPY0172 | 14450 | HPC | 1 | -0.06   | -0.07     | 0.033333  | -0.1895 | -0.125 | 0.084     |
| HPY0173 | 14451 | HPC | 1 | 0.48    | 0.273333  | 0.136667  | 0.355   | 0.045  | 0.192     |
| HPY0174 | 14452 | HPC | 1 | 0.385   | -0.433333 | 0.4       | 0.2125  | 0.325  | 0.032667  |
| HPY0175 | 14453 | HPC | 1 | 0.3     | 0.156667  | 0.24      | -0.18   | 0.21   | 0.16      |
| HPY0176 | 14454 | HPC | 1 | -0.32   | -0.196667 | -0.076667 | 0.08    | 0.33   | 0.475     |
| HPY0177 | 14455 | HPC | 1 | -0.13   | 0.013333  | 0.08      | 0.22    | 0.29   | 0.148667  |
| HPY1594 | 15872 | JHF | 1 | -3.59   | -2.44     | -1.737    | -3.686  | 1.495  | -2.48     |
| HPY1595 | 15873 | JHF | 1 | -3.7345 | -1.963333 | -1.65     | -2.792  | 1.23   | -1.33     |
| HPY0178 | 14456 | HPC | 1 | 0.015   | -0.313333 | -0.375667 | -0.0815 | 0.17   | 0.251333  |
| HPY0179 | 14457 | HPC | 1 | 0.24    | 0.38      | 0.296667  | 0.4345  | 0.015  | 0.258     |
| HPY1796 | 16074 | HPC | 1 | -0.042  | -0.1      | -0.06     | 0.159   | -0.33  | 0.313     |
| HPY0181 | 14459 | HPC | 1 | 0.09    | 0.343333  | 0.11      | 0.2585  | -0.21  | 0.017667  |
| HPY0182 | 14460 | HPC | 1 | 0.2415  | 0.096667  | 0.11      | 0.24    | 0.215  | 0.393667  |
| HPY0183 | 14461 | HPC | 1 | 0.03    | 0.09      | 0.12      | 0.41    | 0.325  | 0.44      |
| HPY0184 | 14462 | HPC | 1 | -0.2    | -0.006667 | -0.406667 | 0.735   | 0.13   | 0.369333  |
| HPY0185 | 14463 | HPC | 1 | 0.1885  | 0.013333  | 0.116667  | 0.0065  | -0.165 | 0.002     |
| HPY0186 | 14464 | HPC | 1 | -0.459  | -1.477667 | -1.446333 | -0.19   | 0.14   | 0.455     |
| HPY0187 | 14465 | HPC | 1 | 0.4545  | -1.386667 | -1.376667 | 0.26    | -0.335 | 0.356333  |
| HPY0188 | 14466 | HPC | 1 | -2.452  | -1.9045   | -1.176667 | 0.05    | -0.04  | -0.48     |
| HPY0189 | 14467 | HPC | 1 | 0.645   | 0.173333  | 0.201     | 0.2295  | 0.165  | 0.161667  |
| HPY0190 | 14468 | HPC | 1 | 0.285   | 0.256667  | 0.078333  | 0.255   | 0.06   | 0.29      |
| HPY0191 | 14469 | HPC | 1 | 0.275   | 0.286667  | 0.156667  | 0.5185  | 0.025  | 0.345667  |
| HPY0192 | 14470 | HPC | 1 | 0.045   | 0.34      | 0.253333  | 0.355   | 0.37   | 0.376667  |
| HPY0193 | 14471 | HPC | 1 | 0.2     | 0.273333  | 0.24      | 0.295   | 0.28   | 0.38      |
| HPY0194 | 14472 | HPC | 1 | 0.005   | -0.23     | 0.096667  | 0.1615  | 0.075  | 0.389333  |
| HPY0195 | 14473 | HPC | 1 | -0.045  | -0.213333 | 0.073333  | 0.27    | 0.235  | 0.321333  |
| HPY0196 | 14474 | HPC | 1 | -0.015  | 0.12      | 0.29      | 0.505   | 0.245  | 0.586667  |
| HPY0197 | 14475 | HPC | 1 | -0.046  | 0.183333  | 0.163333  | 0.091   | 0.27   | 0.437667  |
| HPY0198 | 14476 | HPC | 1 | 0.1925  | 0.173333  | 0.196333  | 0.455   | 0.33   | 0.654     |
| HPY0199 | 14477 | HPC | 1 | -0.005  | -0.096667 | 0.02      | 0.1925  | 0.19   | 0.343333  |
| HPY0200 | 14478 | HPC | 1 | 0.2445  | 0.618     | -0.303333 | 1.37    | -0.665 | 0         |
| HPY0201 | 14479 | HPC | 1 | -0.125  | -0.033333 | -0.033333 | 0.05    | 0.255  | 0.0165    |
| HPY0202 | 14480 | HPC | 1 | 0.3025  | 0.143333  | 0.133333  | 0.28    | 0.47   | 0.263333  |
| HPY0203 | 14481 | HPC | 1 | -0.41   | 0.356667  | 0.248667  | -0.935  | 0.35   | 0.576333  |
| HPY0204 | 14482 | HPC | 1 | 0.065   | -0.303333 | -0.056667 | 0.04    | -0.38  | 0.35      |
| HPY1800 | 16078 | HPC | 1 | -0.651  | -0.846    | -0.567    | -0.43   | -0.455 | -0.216667 |
| HPY0206 | 14484 | HPC | 1 | 0.0825  | -0.233333 | 0.036667  | -0.17   | -0.71  | -0.243667 |
| HPY0207 | 14485 | HPC | 1 | 0.04    | -0.126667 | 0.216667  | 0.145   | 0.125  | 0.308667  |
| HPY0208 | 14486 | HPC | 1 | -0.74   | -0.39     | -0.12     | -0.45   | -0.04  | -0.216667 |
| HPY0209 | 14487 | HPC | 1 | 0.082   | -0.247    | -0.186667 | 0.03    | -0.375 | -0.034    |
| HPY0210 | 14488 | HPC | 1 | 0.07    | 0.013333  | 0.176667  | -0.035  | 0.235  | 0.15      |
| HPY1685 | 15963 | HPC | 1 | -0.725  | 0.05      | 0.333333  | 0.1205  | -0.115 | -0.195    |
| HPY0212 | 14490 | HPC | 1 | -0.08   | -0.253333 | -0.033333 | -0.216  | 0.31   | 0.403     |
| HPY0213 | 14491 | HPC | 1 | 0.1     | 0.45      | -0.033333 | 0       | 0.02   | 0.467     |
| HPY0214 | 14492 | HPC | 1 | 0.09    | 0.34      | 0.153333  | -0.02   | 0.03   | 0.356667  |
| HPY0215 | 14493 | HPC | 1 | 0.2655  | 0.18      | -0.013333 | 0.2865  | -0.005 | -0.078333 |
| HPY0216 | 14494 | HPC | 1 | -0.089  | -0.353333 | -0.236667 | -0.04   | -0.1   | -0.000333 |
| HPY0217 | 14495 | HPC | 1 | 0.125   | -1.206667 | -1.336667 | -2.16   | -0.225 | 0.096667  |
| HPY0218 | 14496 | HPC | 1 | -0.165  | 0.186667  | 0.026667  | -0.005  | 0.075  | -0.066667 |
| HPY0219 | 14497 | HPC | 1 | 0.2     | 0.046667  | 0.18      | 0.435   | 0.105  | 0.133333  |

|         |       |     |   |         |           |           |         |        |           |
|---------|-------|-----|---|---------|-----------|-----------|---------|--------|-----------|
| HPY0220 | 14498 | HPC | 1 | 0.026   | -0.206667 | -0.043333 | 0.24    | 0.3    | 0.271     |
| HPY1711 | 15989 | HPC | 1 | -0.149  | 0.333333  | 0.209     | 0.28    | 0.11   | 0.142667  |
| HPY0222 | 14500 | HPC | 1 | 0.1595  | 0.174     | -0.006667 | -0.0145 | 0.34   | 0.459333  |
| HPY0223 | 14501 | HPC | 1 | -0.25   | -0.08     | -0.043333 | 0.4755  | -0.005 | 0.33      |
| HPY0224 | 14502 | HPC | 1 | -0.045  | 0.16      | 0.136667  | 0.29    | 0.02   | 0.304333  |
| HPY0225 | 14503 | HPC | 1 | -0.337  | 0.478     | -0.8405   | 0.694   | -0.51  | 1.241     |
| HPY0226 | 14504 | HPC | 1 | 0.2975  | 0.01      | 0.07      | 0.571   | 0.045  | 0.337667  |
| HPY0227 | 14505 | HPC | 1 | -1.021  | -0.502333 | -0.31     | -0.065  | -0.63  | 0.303     |
| HPY1701 | 15979 | HPC | 1 | 0.183   | 0.253333  | 0.052667  | 0.035   | 0.16   | 0.349667  |
| HPY0229 | 14507 | HPC | 1 | -0.46   | 0.493333  | 0.236667  | -0.11   | -0.38  | 0.06      |
| HPY1708 | 15986 | HPC | 1 | -0.1935 | -0.11     | -0.147667 | -0.188  | 0.04   | 0         |
| HPY0231 | 14509 | HPC | 1 | 0.135   | -0.340333 | -0.5      | 0.0175  | 0.045  | 0.194667  |
| HPY0232 | 14510 | HPC | 1 | -0.15   | 0.313333  | 0.256667  | 0.425   | 0.26   | 0.423333  |
| HPY0233 | 14511 | HPC | 1 | -0.235  | 0.196667  | 0.03      | 0.12    | 0.335  | 0.356667  |
| HPY0234 | 14512 | HPC | 1 | -0.023  | -0.166667 | 0.03      | -0.25   | -0.08  | 0.338     |
| HPY0235 | 14513 | HPC | 1 | 0.315   | 0.426667  | 0.313333  | 0.525   | 0.05   | 0.523333  |
| HPY0236 | 14514 | HPC | 1 | -0.19   | 0.263333  | 0.263333  | 0.1155  | 0.26   | 0.168     |
| HPY0237 | 14515 | HPC | 1 | 0.097   | 0.327333  | 0.263667  | -0.015  | 0.02   | 0.263333  |
| HPY0238 | 14516 | HPC | 1 | 0.08    | 0.176667  | 0.217667  | 0.295   | 0.13   | 0.386667  |
| HPY0239 | 14517 | HPC | 1 | -0.3185 | -0.092667 | -0.16     | 0.27    | -0.195 | 0.05      |
| HPY0240 | 14518 | HPC | 1 | 0.045   | -0.17     | 0.05      | -0.055  | -0.05  | -0.022    |
| HPY0241 | 14519 | HPC | 1 | -0.125  | 0.073333  | 0.326667  | 0.705   | 0.025  | 0.09      |
| HPY0242 | 14520 | HPC | 1 | -0.66   | -0.474    | -0.096667 | -0.2855 | 0.07   | -0.132    |
| HPY0243 | 14521 | HPC | 1 | 0.0005  | -0.383333 | -0.116667 | -0.21   | 0.18   | 0.123333  |
| HPY0244 | 14522 | HPC | 1 | 0.295   | -0.283333 | 0.026667  | 0.03    | 0.05   | -0.045    |
| HPY1749 | 16027 | HPC | 1 | -0.1    | 0.006667  | 0.03      | -0.54   | -0.07  | -0.082    |
| HPY0246 | 14524 | HPC | 1 | 0.325   | 0.513333  | 0.403667  | 0.395   | 0.44   | 0.446667  |
| HPY0247 | 14525 | HPC | 1 | 0.304   | 0.453333  | 0.131667  | 0.375   | 0.265  | -0.1035   |
| HPY0248 | 14526 | HPC | 1 | 0.5195  | 0.493333  | 0.096667  | 0.41    | 0.43   | 0.374     |
| HPY0249 | 14527 | HPC | 1 | 0.225   | 0.183333  | 0.116667  | 0.215   | 0.055  | 0.229333  |
| HPY1790 | 16068 | HPC | 1 | -0.087  | -0.263333 | -0.073333 | 0.445   | -0.285 | 0.400333  |
| HPY0251 | 14529 | HPC | 1 | 0.214   | 0.502667  | 0.008333  | 0.35    | -0.035 | 0.02      |
| HPY0253 | 14531 | HPC | 1 | -1.9235 | -0.37     | -0.853333 | 0.09    | 0.065  | -0.23     |
| HPY0254 | 14532 | HPC | 1 | -0.485  | 0.223333  | 0.19      | 0.199   | 0.35   | 0.320667  |
| HPY0255 | 14533 | HPC | 1 | -0.0225 | 0.327333  | 0.171     | 0.145   | 0.335  | 0.27      |
| HPY0256 | 14534 | HPC | 1 | -0.0205 | -0.04     | -0.026667 | -0.065  | 0.445  | -0.1345   |
| HPY0257 | 14535 | HPC | 1 | 0.1045  | -0.023333 | 0.036667  | 0.0655  | 0.17   | 0.163     |
| HPY0258 | 14536 | HPC | 1 | 0.3     | 0.003333  | 0.016667  | -0.005  | -0.38  | -0.136667 |
| HPY1775 | 16053 | HPC | 1 | -0.072  | -0.416667 | -0.11     | 0.101   | -0.245 | 0.428333  |
| HPY0260 | 14538 | HPC | 1 | -0.465  | -1.65     | -1.426667 | -0.11   | 0.275  | 0.123333  |
| HPY0261 | 14539 | HPC | 1 | -1.546  | -1.767333 | -0.824333 | -0.2    | -0.46  | 0.15      |
| HPY1794 | 16072 | HPC | 1 | -1.475  | -0.793333 | -0.303333 | -0.16   | -0.126 | -0.250667 |
| HPY0263 | 14541 | HPC | 1 | -0.2    | -0.41     | -0.12     | -0.195  | -0.06  | -0.097333 |
| HPY0264 | 14542 | HPC | 1 | -0.313  | 0.03      | -0.14     | -0.02   | -0.005 | -0.007    |
| HPY0265 | 14543 | HPC | 1 | 0.275   | 0.253333  | 0.086     | 0.3635  | 0.175  | 0.23      |
| HPY0266 | 14544 | HPC | 1 | 0.03    | 0.123333  | -0.096667 | 0.225   | 0.305  | 0.356667  |
| HPY0267 | 14545 | HPC | 1 | 0.16    | -0.036667 | 0.093333  | 0.055   | 0.31   | 0.402     |
| HPY0268 | 14546 | HPC | 1 | 0.529   | 0.417667  | -0.02     | -0.733  | -0.923 | -1.2605   |
| HPY1723 | 16001 | HPC | 1 | -0.08   | 0.09      | 0.003333  | 0.04    | -0.085 | -0.163333 |
| HPY0270 | 14548 | HPC | 1 | 0.1475  | 0.11      | 0.153333  | 0.161   | 0.575  | 0.28      |
| HPY0271 | 14549 | HPC | 1 | -0.085  | -0.403333 | -0.043333 | -0.02   | 0.365  | 0.19      |
| HPY0272 | 14550 | HPC | 1 | -0.295  | 0.263333  | 0.256667  | 0.125   | 0.215  | 0.047667  |
| HPY0273 | 14551 | HPC | 1 | -0.2055 | -0.272    | -0.035333 | 0.123   | -0.081 | -0.27     |
| HPY0274 | 14552 | HPC | 1 | 0.075   | -0.143333 | -0.02     | -0.14   | -0.005 | 0.013333  |
| HPY0275 | 14553 | HPC | 1 | 0.2405  | 0.118     | 0.181     | 0.135   | 0.21   | 0.14      |

|         |           |   |         |           |           |         |        |           |
|---------|-----------|---|---------|-----------|-----------|---------|--------|-----------|
| HPY0276 | 14554 HPC | 1 | 0.545   | -0.326667 | 0.213333  | 0.256   | 0.065  | 0.102667  |
| HPY1745 | 16023 HPC | 1 | -0.035  | 0.417667  | 0.363333  | 0.46    | 0.04   | -0.023    |
| HPY0278 | 14556 HPC | 1 | 0.04    | 0.196667  | 0.156667  | 0.09    | 0.33   | 0.362333  |
| HPY0279 | 14557 HPC | 1 | 0.0585  | -0.2      | 0.081333  | -0.04   | 0.13   | 0.076667  |
| HPY0280 | 14558 HPC | 1 | -0.395  | -0.033333 | -0.123333 | -0.1825 | 0.035  | 0.306     |
| HPY0281 | 14559 HPC | 1 | -0.22   | -0.19     | -0.006667 | -0.07   | 0.2    | -0.063333 |
| HPY0282 | 14560 HPC | 1 | 0.295   | 0.06      | 0.163333  | 0.285   | 0.06   | 0.116667  |
| HPY0283 | 14561 HPC | 1 | -0.315  | -0.226667 | -0.056667 | -0.0355 | 0.1    | 0.345     |
| HPY0284 | 14562 HPC | 1 | 0.1235  | 0.28      | 0.306667  | 0.235   | 0.375  | 0.391667  |
| HPY0285 | 14563 HPC | 1 | -0.275  | -0.183333 | 0.163333  | 0.56    | 0.495  | 0.690333  |
| HPY0286 | 14564 HPC | 1 | 0.075   | -0.1      | 0.123333  | 0.06    | 0.235  | 0.417667  |
| HPY1700 | 15978 HPC | 1 | 0.2165  | -0.416667 | -0.136667 | 0.1725  | -0.607 | 0.2145    |
| HPY0288 | 14566 HPC | 1 | 0.01    | 0.14      | -0.07     | -0.26   | 0.275  | 0.096667  |
| HPY1751 | 16029 HPC | 1 | -0.943  | -0.510333 | -0.346667 | 0.14    | -0.335 | -0.1365   |
| HPY0290 | 14568 HPC | 1 | 0.1405  | -0.313333 | 0.003333  | 0.3     | 0.14   | 0.71      |
| HPY0291 | 14569 HPC | 1 | -0.1445 | -0.186667 | 0.016667  | -0.054  | 0.145  | 0.555     |
| HPY0292 | 14570 HPC | 1 | -0.23   | -0.08     | 0.236667  | 0.065   | 0.195  | 0.416333  |
| HPY0293 | 14571 HPC | 1 | 0.05    | 0.18      | 0.163333  | 0.25    | 0.225  | 0.482     |
| HPY0294 | 14572 HPC | 1 | 0.085   | 0.1       | 0.21      | 0.25    | 0.54   | 0.453333  |
| HPY0295 | 14573 HPC | 1 | 0.147   | 0.11      | 0.17      | 0.358   | 0.25   | 0.47      |
| HPY0296 | 14574 HPC | 1 | 0.005   | -0.136667 | -0.266667 | 0.439   | 0      | 0.26      |
| HPY0297 | 14575 HPC | 1 | -0.2725 | 0.04      | 0.026667  | 0.27    | 0.205  | 0.432     |
| HPY1805 | 16083 HPC | 1 | -0.6305 | -0.036667 | -0.310333 | 0.28    | -0.08  | 0.075333  |
| HPY0299 | 14577 HPC | 1 | 0.135   | -0.016667 | -0.063333 | 0.1185  | -0.215 | 0.638     |
| HPY0300 | 14578 HPC | 1 | 0.25    | 0.353333  | 0.22      | 0.1335  | -0.025 | 0.520333  |
| HPY0301 | 14579 HPC | 1 | -0.11   | 0.186667  | 0.200333  | 0.035   | 0.11   | 0.386667  |
| HPY0302 | 14580 HPC | 1 | 0.069   | 0.263333  | 0.087333  | 0.212   | 0.27   | 0.401333  |
| HPY0303 | 14581 HPC | 1 | -0.46   | -0.076667 | -0.36     | -0.47   | -0.09  | 0.42      |
| HPY0304 | 14582 HPC | 1 | 0.04    | 0.296667  | 0.29      | 0.615   | 0.08   | 0.466667  |
| HPY1731 | 16009 HPC | 1 | -0.024  | -0.216667 | -0.046667 | 0.2225  | -0.005 | 0.228667  |
| HPY1735 | 16013 HPC | 1 | -0.124  | 0.196667  | 0.083667  | 0.16    | 0.3    | 0.27      |
| HPY0307 | 14585 HPC | 1 | 0.02    | 0.1       | -0.113333 | 0.146   | 0.18   | 0.135333  |
| HPY0308 | 14586 HPC | 1 | 0.452   | 0.083333  | -0.096667 | 0.03    | 0.01   | -0.145    |
| HPY0309 | 14587 HPC | 1 | -0.005  | -0.003333 | 0.196667  | 0       | 0.115  | 0.343333  |
| HPY0310 | 14588 HPC | 1 | -0.315  | 0.246667  | 0.126667  | 0.25    | 0.385  | 0.286667  |
| HPY0311 | 14589 HPC | 1 | -0.015  | 0.016667  | 0.109667  | 0.227   | -0.64  | -0.052667 |
| HPY0312 | 14590 HPC | 1 | 0.2     | 0.183333  | 0.098667  | -0.1625 | -0.05  | 0.55      |
| HPY0313 | 14591 HPC | 1 | 0.53    | 0.246667  | 0.323333  | -0.055  | 0.405  | 0.306667  |
| HPY0314 | 14592 HPC | 1 | -0.991  | -0.490333 | -0.943333 | -0.5805 | -1.025 | -0.397    |
| HPY0315 | 14593 HPC | 1 | -1.9595 | -0.092667 | 0.15      | -1.07   | -1.615 | -0.476    |
| HPY0317 | 14595 HPC | 1 | -1.365  | 0.483333  | 0.373333  | -0.01   | -2.065 | -1.033333 |
| HPY0318 | 14596 HPC | 1 | 0       | -0.06     | 0.17      | -0.19   | 0.225  | 0.378667  |
| HPY0319 | 14597 HPC | 1 | 0.114   | -0.096667 | 0.113333  | 0.019   | 0.115  | 0.353     |
| HPY1744 | 16022 HPC | 1 | 0.5005  | 0.166333  | 0.313333  | -0.0025 | 0.29   | 0.334333  |
| HPY0321 | 14599 HPC | 1 | 0.34    | 0.166667  | -0.03     | 0.31    | 0.295  | 0.113333  |
| HPY0322 | 14600 HPC | 1 | 0.175   | 0.143333  | 0.22      | -0.045  | -0.18  | -0.153333 |
| HPY0323 | 14601 HPC | 1 | -0.035  | -0.033333 | 0.253333  | 0.17    | 0.49   | 0.436     |
| HPY0324 | 14602 HPC | 1 | 0.28    | 0.468333  | 0.413333  | 1       | -0.15  | -0.009667 |
| HPY0325 | 14603 HPC | 1 | 0.0795  | -0.113333 | 0.15      | 0.61    | 0.5    | 0.812     |
| HPY0326 | 14604 HPC | 1 | -0.035  | -0.343333 | 0.136667  | -0.16   | 0.075  | 0.177333  |
| HPY0327 | 14605 HPC | 1 | -0.09   | -0.223333 | 0.066667  | 0.1385  | -0.1   | 0.390667  |
| HPY0328 | 14606 HPC | 1 | 0.0375  | 0.246667  | 0.291333  | 0.485   | -0.09  | 0.136667  |
| HPY0329 | 14607 HPC | 1 | 0.33    | -0.256667 | -0.14     | -0.347  | -0.22  | 0.031     |
| HPY0330 | 14608 HPC | 1 | -0.115  | 0.063333  | 0.013333  | 0.215   | 0.18   | 0.263333  |
| HPY0331 | 14609 HPC | 1 | 0.055   | 0.053333  | -0.04     | -0.155  | 0.155  | 0.472333  |

|         |           |   |         |           |           |         |        |           |
|---------|-----------|---|---------|-----------|-----------|---------|--------|-----------|
| HPY0332 | 14610 HPC | 1 | -0.4595 | 0.39      | -0.28     | 0.345   | 0.14   | 0.243     |
| HPY0333 | 14611 HPC | 1 | -0.215  | -0.1      | 0.01      | 0.0315  | 0.35   | 0.235667  |
| HPY0334 | 14612 HPC | 1 | -0.205  | -0.883333 | -0.163333 | -0.0975 | -0.54  | -0.105333 |
| HPY0335 | 14613 HPC | 1 | -2.296  | -1.557    | -1.303333 | -1.566  | -2.19  | -1.634667 |
| HPY0336 | 14614 HPC | 1 | -2.6115 | -1.476667 | -2.090333 | -2.1445 | -2.29  | -1.940667 |
| HPY1806 | 16084 JHF | 1 | -1.555  | -1.163333 | -0.92     | -1.31   | 1.635  | -1.276667 |
| HPY0337 | 14615 HPC | 1 | -0.5475 | -0.786667 | -0.713333 | -0.6    | -0.77  | -0.513333 |
| HPY0338 | 14616 HPC | 1 | -0.705  | -0.666667 | -0.44     | -0.5675 | -0.72  | -0.274667 |
| HPY0339 | 14617 HPC | 1 | -2.16   | -1.766667 | -1.636667 | -1.39   | -1.845 | -1.487667 |
| HPY0340 | 14618 HPC | 1 | -0.9505 | -0.91     | -1.01     | -1.69   | -2.09  | -1.347333 |
| HPY0341 | 14619 HPC | 1 | -1.0705 | -1.344    | -0.770333 | -0.805  | -0.8   | -0.797333 |
| HPY0342 | 14620 HPC | 1 | -1.82   | -1.836667 | -1.4      | -2.525  | -2.45  | -1.436    |
| HPY0343 | 14621 HPC | 1 | -0.675  | -1.055333 | -0.866667 | -0.9485 | -1.95  | -0.998667 |
| HPY0344 | 14622 HPC | 1 | -4.3565 | -1.533333 | -1.536667 | -3.075  | -2.74  | -2.15     |
| HPY0345 | 14623 HPC | 1 | -0.805  | -1.580333 | -0.99     | -0.52   | -2.075 | -1.648333 |
| HPY0346 | 14624 HPC | 1 | -1.2315 | -1.303333 | -1.303333 | -2.565  | -2.485 | -1.685333 |
| HPY0347 | 14625 HPC | 1 | -0.11   | 0.006667  | 0.023333  | -0.4395 | -0.25  | 0.127667  |
| HPY0348 | 14626 HPC | 1 | -0.062  | 0.016667  | -0.013333 | 0.362   | -0.015 | 0.083333  |
| HPY0349 | 14627 HPC | 1 | 0.145   | 0.3       | 0.176667  | 0.36    | 0.345  | 0.55      |
| HPY0350 | 14628 HPC | 1 | 0.161   | 0.04      | -0.033333 | 0.2575  | -0.605 | -0.16     |
| HPY1791 | 16069 HPC | 1 | 0       | 0.066667  | 0.016667  | 0.155   | -0.1   | 0.124667  |
| HPY0352 | 14630 HPC | 1 | 0.5185  | 0.29      | 0.053333  | 0.265   | 0.21   | 0.410667  |
| HPY0353 | 14631 HPC | 1 | -0.09   | 0.1       | 0.066667  | 0.105   | 0.36   | 0.376667  |
| HPY0354 | 14632 HPC | 1 | -0.009  | 0.24      | -0.126667 | -0.3155 | 0.07   | 0.4575    |
| HPY0355 | 14633 HPC | 1 | -0.045  | 0.016667  | 0.136667  | 0.181   | 0.22   | 0.373333  |
| HPY0356 | 14634 HPC | 1 | -2.126  | -1.193333 | -0.916667 | 0.2175  | 0.225  | 0.282667  |
| HPY0357 | 14635 HPC | 1 | -0.16   | -0.155333 | 0.086667  | 0.02    | 0.255  | -0.030333 |
| HPY1797 | 16075 HPC | 1 | -0.29   | -0.19     | 0.066667  | 0.01    | 0.185  | 0.137333  |
| HPY0360 | 14638 HPC | 1 | -0.073  | -0.133333 | 0.003333  | 0.23    | -0.165 | 0.44      |
| HPY0361 | 14639 HPC | 1 | 0.16    | 0.373333  | 0.3       | 0.25    | -0.035 | 0.1       |
| HPY0362 | 14640 HPC | 1 | -0.04   | 0.006667  | 0.126667  | 0.04    | 0.32   | 0.35      |
| HPY0363 | 14641 HPC | 1 | 0.015   | 0.143333  | 0.12      | 0.215   | 0.12   | 0.336     |
| HPY0364 | 14642 HPC | 1 | 0.26    | -1.236667 | 0.193333  | 0.215   | 0.185  | 0.466     |
| HPY0365 | 14643 HPC | 1 | 0.453   | -0.239    | -0.173333 | -0.02   | 0.295  | 0.12      |
| HPY0366 | 14644 HPC | 1 | 0.027   | -0.166667 | 0.131333  | 0.28    | 0.3    | 0.226667  |
| HPY0367 | 14645 HPC | 1 | 0.125   | -0.03     | 0.276667  | 0.19    | 0.1    | -0.215    |
| HPY0368 | 14646 HPC | 1 | 0.3435  | -0.463333 | 0.013333  | -0.1165 | 0.28   | 0.194     |
| HPY0369 | 14647 HPC | 1 | -0.11   | -0.146667 | 0.096667  | 0.1405  | 0.4    | 0.240667  |
| HPY0370 | 14648 HPC | 1 | 0.07    | -0.2      | 0.036667  | 0.3515  | 0.14   | 0.345333  |
| HPY0371 | 14649 HPC | 1 | 0.2665  | 0.43      | 0.326667  | 0.34    | 0.06   | 0.043333  |
| HPY0372 | 14650 HPC | 1 | 0.105   | 0.296667  | 0.07      | 0.574   | -0.295 | 0.254     |
| HPY0373 | 14651 HPC | 1 | 0.5     | 0.556667  | 0.566667  | 1.07    | -1.915 | -1.537    |
| HPY0374 | 14652 HPC | 1 | -0.085  | 0.236667  | 0.134     | -0.165  | 0.015  | 0.012333  |
| HPY0375 | 14653 HPC | 1 | -0.18   | -0.066667 | -0.172333 | -0.055  | -0.265 | -0.136667 |
| HPY0376 | 14654 HPC | 1 | 0.08    | -0.011667 | 0.156667  | 0.065   | 0.2    | 0.23      |
| HPY0377 | 14655 HPC | 1 | 0.12    | -0.07     | 0.134333  | 0.01    | 0.22   | 0.359333  |
| HPY0378 | 14656 HPC | 1 | -0.0595 | 0.06      | -0.208667 | -0.27   | -0.13  | 0.181     |
| HPY0379 | 14657 HPC | 1 | -0.595  | -0.226667 | -0.033333 | -0.59   | 0.25   | -0.065    |
| HPY0380 | 14658 HPC | 1 | -0.32   | 0.09      | -0.02     | -0.0935 | 0.1    | 0.295667  |
| HPY0381 | 14659 HPC | 1 | 0.057   | -0.413333 | -0.173333 | -0.3125 | 0.2    | 0.133333  |
| HPY0382 | 14660 HPC | 1 | 0.276   | 0.15      | 0.09      | 0.2615  | 0.08   | 0.403667  |
| HPY0383 | 14661 HPC | 1 | 0.08    | -0.26     | 0.036667  | -0.015  | 0.29   | 0.430667  |
| HPY0384 | 14662 HPC | 1 | 0.195   | 0.24      | 0.086667  | 0.475   | -0.835 | 0.026667  |
| HPY0385 | 14663 HPC | 1 | 0.22    | 0.205     | -0.307    | 0       | -0.06  | -0.16     |
| HPY0386 | 14664 HPC | 1 | 0.3295  | 0.016667  | 0.136667  | -0.466  | 0.3825 | 0.228     |

|         |           |   |         |           |           |         |         |           |
|---------|-----------|---|---------|-----------|-----------|---------|---------|-----------|
| HPY0387 | 14665 HPC | 1 | 0.035   | -0.26     | 0.069     | -0.065  | 0.275   | 0.375     |
| HPY0388 | 14666 HPC | 1 | 0.1845  | -0.06     | 0.13      | -0.018  | 0.445   | 0.430667  |
| HPY0389 | 14667 HPC | 1 | -0.01   | -0.106667 | 0         | -0.215  | 0.4     | 0.343333  |
| HPY1734 | 16012 HPC | 1 | -0.425  | -0.510333 | -0.136667 | -0.45   | 0.255   | 0.378667  |
| HPY0391 | 14669 HPC | 1 | 0.1815  | 0.22      | 0.113333  | -0.2965 | 0.07    | 0.252667  |
| HPY0392 | 14670 HPC | 1 | -0.0455 | 0.29      | 0.016667  | 0.4135  | 0       | -0.481    |
| HPY0393 | 14671 HPC | 1 | 0.4625  | -0.016667 | 0.136333  | 0.225   | 0.185   | 0.316667  |
| HPY0394 | 14672 HPC | 1 | 0.271   | 0.02      | 0.116667  | 0.215   | 0.38    | 0.456667  |
| HPY0395 | 14673 HPC | 1 | -0.025  | -0.156667 | -0.123333 | 0.05    | 0.21    | 0.176667  |
| HPY0396 | 14674 HPC | 1 | 0.23    | 0.223333  | 0.293333  | 0.02    | 0.275   | 0.456667  |
| HPY0397 | 14675 HPC | 1 | 0.13    | 0.133333  | 0.233333  | 0.23    | 0.25    | 0.606667  |
| HPY0398 | 14676 HPC | 1 | -0.099  | 0.026667  | -0.073667 | -0.075  | -0.47   | 0.096667  |
| HPY0399 | 14677 HPC | 1 | 0.025   | 0.096667  | 0.146667  | 0.23    | 0.31    | 0.38      |
| HPY0400 | 14678 HPC | 1 | 0.445   | -0.34     | -0.033333 | -0.08   | 0.115   | 0.225667  |
| HPY0401 | 14679 HPC | 1 | -0.315  | -0.366667 | -0.143333 | -0.155  | 0.11    | 0.146667  |
| HPY0402 | 14680 HPC | 1 | 0.125   | -0.186667 | 0.056667  | 0.065   | 0.035   | 0.346667  |
| HPY0403 | 14681 HPC | 1 | 0.145   | 0.014667  | 0.23      | 0.185   | 0.265   | 0.256667  |
| HPY0404 | 14682 HPC | 1 | -0.085  | -0.107    | 0.183333  | -0.003  | 0.37    | 0.363667  |
| HPY0405 | 14683 HPC | 1 | -0.1    | -0.173333 | 0.013333  | 0.33    | 0.215   | 0.276667  |
| HPY0406 | 14684 HPC | 1 | 0.085   | 0.003333  | 0.066667  | -0.065  | -0.06   | 0.094     |
| HPY0407 | 14685 HPC | 1 | -0.349  | 0.269333  | 0.047     | 0.25    | 0.135   | -0.1215   |
| HPY0408 | 14686 HPC | 1 | -0.325  | -0.046667 | -0.02     | 0.01    | -0.6415 | -0.300667 |
| HPY0409 | 14687 HPC | 1 | 0.19    | 0.01      | 0.107667  | 0.185   | 0.065   | 0.256667  |
| HPY0410 | 14688 HPC | 1 | -0.07   | 0.046667  | 0.043333  | 0.415   | -0.26   | 0.198667  |
| HPY0411 | 14689 HPC | 1 | 0.1905  | 0.192667  | 0.168333  | 0.005   | 0.295   | 0.115     |
| HPY0412 | 14690 HPC | 1 | -0.745  | 0.155     | -0.623333 | 0.6     | -0.42   | -0.74     |
| HPY0413 | 14691 HPC | 1 | 0.1935  | -0.273333 | -0.07     | -2.103  | -0.675  | 0.509667  |
| HPY0414 | 14692 HPC | 1 | 0.4455  | 0.273333  | 0.263333  | -1.925  | -1.19   | 1.305     |
| HPY0415 | 14693 HPC | 1 | 0.12    | -0.376667 | 0.103333  | 0.055   | 0.245   | 0.316     |
| HPY0416 | 14694 HPC | 1 | 0.41    | 0.423333  | 0.263333  | 0.48    | 0.235   | 0.473333  |
| HPY0417 | 14695 HPC | 1 | 0.225   | -0.08     | 0.138667  | 0.135   | 0.19    | 0.151333  |
| HPY0418 | 14696 HPC | 1 | -0.09   | 0.19      | 0.209333  | 0.24    | 0.125   | 0.136667  |
| HPY0419 | 14697 HPC | 1 | -0.259  | -0.216667 | 0.15      | -0.0175 | 0.28    | 0.418     |
| HPY0420 | 14698 HPC | 1 | 0.1895  | 0.246667  | 0.142667  | 0.265   | 0.31    | 0.376667  |
| HPY0421 | 14699 HPC | 1 | 0.21    | -0.007    | 0.136667  | 0.3155  | 0.085   | 0.479     |
| HPY1656 | 15934 JHF | 1 | -2.255  | -1.213333 | -0.586667 | -1.19   | 0.985   | -0.993333 |
| HPY1657 | 15935 JHF | 1 | -0.27   | -0.14     | -0.093333 | -0.8775 | 1.26    | 0.83      |
| HPY1658 | 15936 JHF | 1 | -0.7    | -0.26     | -0.033333 | -0.195  | 1.395   | 1.1315    |
| HPY1659 | 15937 JHF | 1 | -0.48   | -0.526667 | -0.2      | -0.9545 | 1.44    | 0.899     |
| HPY1660 | 15938 JHF | 1 | 0.0845  | -0.254667 | 0.11      | 0.12    | 1.41    | 1.3195    |
| HPY1661 | 15939 JHF | 1 | -1.03   | -0.336667 | -0.722333 | -1.0245 | 0.675   | -0.4765   |
| HPY1662 | 15940 JHF | 1 | -2.989  | -3.895667 | -0.64     | -0.6    | 0.84    | 0.25      |
| HPY1663 | 15941 JHF | 1 | -1.9455 | 0.574     | 1.073333  | -1.58   | 1       | 0.505     |
| HPY1664 | 15942 JHF | 1 | -4.25   | 0.419333  | 0.863333  | -1.27   | 1       | 0.06      |
| HPY0422 | 14700 HPC | 1 | 0       | 0.096667  | 0.073333  | 0.165   | 0.27    | 0.31      |
| HPY0423 | 14701 HPC | 1 | -1.985  | -0.363333 | -0.303333 | -1.422  | -2.065  | -1.681333 |
| HPY0424 | 14702 HPC | 1 | -0.2715 | -0.076667 | -0.083333 | -0.207  | -0.36   | -2.231667 |
| HPY0425 | 14703 HPC | 1 | -0.28   | -0.46     | -0.043333 | -0.395  | -0.26   | -2.61     |
| HPY0426 | 14704 HPC | 1 | -0.2565 | -0.466667 | -0.092    | -0.215  | -0.515  | -2.233333 |
| HPY0427 | 14705 HPC | 1 | -2.314  | -1.1      | -0.253333 | -1.05   | -1.175  | -0.606667 |
| HPY1718 | 15996 HPC | 1 | -4.53   | -1.834333 | -1.576667 | -3.761  | -3.3315 | -2.582    |
| HPY0430 | 14708 HPC | 1 | -2.914  | -0.8715   | -2.296667 | -1.8    | -1.9725 | -1.5      |
| HPY0431 | 14709 HPC | 1 | -2.21   | -1.506667 | -1.553333 | -2.2    | -3.18   | -2.32     |
| HPY0432 | 14710 HPC | 1 | -2.6685 | -1.686667 | -1.566667 | -2.655  | -3.565  | -2.863    |
| HPY1739 | 16017 HPC | 1 | -2.7695 | -1.233333 | -1.677667 | -2.09   | -3.205  | -2.518667 |



|         |       |     |   |         |           |           |         |         |           |
|---------|-------|-----|---|---------|-----------|-----------|---------|---------|-----------|
| HPY0434 | 14712 | HPC | 1 | -3.2455 | -1.21     | -1.293333 | -2.636  | -3.165  | -1.791    |
| HPY0435 | 14713 | HPC | 1 | -3.215  | -1.353333 | -1.2      | -2.9975 | -3      | -2.877667 |
| HPY1684 | 15962 | HPC | 1 | -1.747  | -0.756667 | -1.781667 |         | -2.155  | 0.118     |
| HPY0437 | 14715 | HPC | 1 | -0.475  | 0.316667  | 0.543333  | -2.105  | -2.215  | -1.713333 |
| HPY0438 | 14716 | HPC | 1 | -1.77   | 0.67      | 0.87      | -3.41   | -2.75   | -2.26     |
| HPY1777 | 16055 | HPC | 1 | -3.598  | -1.32     | -1.113333 | -2.67   | -2.58   | -1.365    |
| HPY1802 | 16080 | HPC | 1 | -2.5245 | -2.103333 | -1.32     | -2.465  | -2.1655 | -1.616667 |
| HPY0441 | 14719 | HPC | 1 | -2.07   | -1.486667 | -1.95     | -3.404  | -2.65   | -2.358333 |
| HPY0443 | 14721 | HPC | 1 | -3      | -2.115667 | -2.413667 | -3.38   | -3.941  | -1.64     |
| HPY0445 | 14723 | HPC | 1 | -1.864  | -1.4105   | -0.85     | -0.72   | -2.235  |           |
| HPY0446 | 14724 | HPC | 1 | -2.18   | -2.29     | -1.34     | -2.265  | -2.125  | -1.813333 |
| HPY0447 | 14725 | HPC | 1 | -5.484  | -2.851    | -2.175    | -3.5    | -2.88   | -2.684    |
| HPY0448 | 14726 | HPC | 1 | -2.72   | -3.169333 | -1.513333 | -2.64   | -3.1    | -2.624333 |
| HPY0449 | 14727 | HPC | 1 | -3.57   | -2.113333 | -1.826667 | -2.18   | -2.805  | -2.450667 |
| HPY0450 | 14728 | HPC | 1 | -3.47   | -3.312667 | -1.521333 | -1.6315 | -2.455  | -2.301    |
| HPY0451 | 14729 | HPC | 1 | -3.905  | -2.238333 | -2.173333 | -4.27   | -3.395  | -3.699333 |
| HPY0452 | 14730 | HPC | 1 | -2.845  | -3.106667 | -2.066333 | -3.37   | -4.115  | -2.908667 |
| HPY0453 | 14731 | HPC | 1 | -1.31   | -1.425    | -1.043333 | -1.35   | -2.325  | -2.209667 |
| HPY0454 | 14732 | HPC | 1 | -3.2465 | -1.986667 | -1.768667 | -2.88   | -2.445  | -2.946667 |
| HPY0455 | 14733 | HPC | 1 | 0.07    | -1.434667 | -1.966667 | -3.593  | -1.2    | -2.685    |
| HPY0456 | 14734 | HPC | 1 | -0.436  | -0.273333 | -0.173333 | -2.0175 | -2.05   | -1.215667 |
| HPY0457 | 14735 | HPC | 1 | 1.503   | -0.018667 | 0.563333  | -0.8    | -2.8315 |           |
| HPY0458 | 14736 | HPC | 1 | 0.52    | 0.6705    | 0.503333  | -1.49   | -1.94   | -0.359    |
| HPY0459 | 14737 | HPC | 1 | 1.8095  | 0.635667  | 0.930667  | -2.894  | -3.325  | -2.182667 |
| HPY0460 | 14738 | HPC | 1 | 1.29    | 0.246667  | 0.64      | -0.827  | -1.655  | -0.527667 |
| HPY0462 | 14740 | HPC | 1 | 0.1825  | -1.455667 | -1.327333 | -2.64   | -1.105  | -0.195    |
| HPY0463 | 14741 | HPC | 1 | 0.37    | -0.156667 | 0.19      | -0.04   | 0.125   | 0.2       |
| HPY0464 | 14742 | HPC | 1 | -0.355  | -0.43     | -0.223333 | -0.08   | -0.235  | -0.213333 |
| HPY0465 | 14743 | HPC | 1 | -0.16   | -0.54     | -0.09     | -0.015  | 0.105   | 0.018     |
| HPY0466 | 14744 | HPC | 1 | 0.128   | -0.056667 | 0.144     | 0.17    | 0.22    | 0.389     |
| HPY0467 | 14745 | HPC | 1 | 0.57    | 0.1       | 0.006667  | 0.2     | 0.47    | 0.383333  |
| HPY0468 | 14746 | HPC | 1 | 0.11    | -0.04     | 0.126667  | -0.12   | 0.18    | 0.086667  |
| HPY0469 | 14747 | HPC | 1 | -0.05   | -0.126667 | -0.036667 | -0.15   | -0.3    | -0.0105   |
| HPY0470 | 14748 | HPC | 1 | 0.385   | -0.273333 | 0.056667  | 0.1     | 0.235   | 0.332     |
| HPY0471 | 14749 | HPC | 1 | 0.4845  | 0.2       | 0.312667  | 0.305   | 0.125   | 0.296667  |
| HPY0472 | 14750 | HPC | 1 | 0.4145  | 0.083333  | 0.063333  | 0.14    | 0.245   | 0.465     |
| HPY0473 | 14751 | HPC | 1 | -0.025  | -0.393333 | -0.013333 | 0.0795  | -0.03   | 0.188     |
| HPY0474 | 14752 | HPC | 1 | -0.01   | 0.013333  | 0.17      | 0.16    | 0.405   | 0.013333  |
| HPY0475 | 14753 | HPC | 1 | -0.42   | -0.11     | -0.193333 | 0.31    | 0.365   | -0.306667 |
| HPY0476 | 14754 | HPC | 1 | 0.205   | -0.11     | 0.116667  | 0.085   | 0.225   | 0.348     |
| HPY0477 | 14755 | HPC | 1 | -0.1    | 0.126667  | 0.13      | 0.29    | -0.475  | 0.019667  |
| HPY0478 | 14756 | HPC | 1 | -0.0365 | -0.096667 | -0.053333 | -0.045  | -0.025  | 0.193333  |
| HPY0479 | 14757 | HPC | 1 | 0.26    | -0.36     | 0.02      | 0.079   | 0.185   | 0.224667  |
| HPY0480 | 14758 | HPC | 1 | 0.0455  | 0.286667  | 0.17      | 0.41    | 0.395   | 0.516667  |
| HPY1716 | 15994 | HPC | 1 | 0.1655  | 0.283333  | 0.121     | -2.38   | -0.385  | 0.08      |
| HPY0482 | 14760 | HPC | 1 | 0.005   | -0.076667 | 0.01      | -3.17   | -0.04   | 0.663333  |
| HPY0483 | 14761 | HPC | 1 | -0.2    | -1.57     | -1.108333 | -2.095  | 0.015   | 0.212667  |
| HPY0484 | 14762 | HPC | 1 | 0.2475  | -1.63     | -1.098667 | -2.72   | 0.205   | 0.19      |
| HPY0485 | 14763 | HPC | 1 | 0.1095  | -0.28     | -0.04     | -0.255  | -0.035  | -0.079    |
| HPY0486 | 14764 | HPC | 1 | -0.1555 | 0.061333  | -0.184    | 0.03    | -0.125  | 0.175333  |
| HPY0487 | 14765 | HPC | 1 | 0.17    | -0.033333 | 0.046667  | 0.43    | 0.09    | -0.506    |
| HPY0488 | 14766 | HPC | 1 | -1.65   | -0.193333 | -0.247    | -0.89   | -0.77   | -0.166    |
| HPY0489 | 14767 | HPC | 1 | -0.23   | 0.553333  | 0.44      | -0.0725 | -1.1705 | -0.590333 |
| HPY0490 | 14768 | HPC | 1 | 0.285   | 0.103333  | 0.06      | 0.185   | 0.315   | 0.092     |
| HPY0491 | 14769 | HPC | 1 | -0.4085 | -0.032    | -0.18     | 0.137   | 0.0755  | -0.145    |

|         |       |     |   |         |           |           |         |        |          |
|---------|-------|-----|---|---------|-----------|-----------|---------|--------|----------|
| HPY0492 | 14770 | HPC | 1 | 0.215   | 0.016667  | 0.183333  | 0.54    | 0.095  | 0.106667 |
| HPY0493 | 14771 | HPC | 1 | -0.01   | 0.05      | 0.04      | 0.48    | 0.11   | 0.406667 |
| HPY1704 | 15982 | HPC | 1 | 0.005   | -0.306667 | -0.12     | -0.017  | -0.456 | 0.473667 |
| HPY0495 | 14773 | HPC | 1 | 0.1615  | -0.026667 | 0.091     | 0.4435  | 0.12   | 0.436    |
| HPY0496 | 14774 | HPC | 1 | 0.285   | -0.240333 | 0.026667  | 0.4065  | 0.13   | 0.383667 |
| HPY0497 | 14775 | HPC | 1 | 0.25    | 0.056667  | 0.086667  | 0.025   | 0.11   | 0.257    |
| HPY0498 | 14776 | HPC | 1 | -0.395  | -0.036667 | -0.276667 | 0.39    | -0.155 | 0.35     |
| HPY0499 | 14777 | HPC | 1 | -0.1705 | -0.17     | -0.06     | 0.1335  | 0.089  | 0.253333 |
| HPY0500 | 14778 | HPC | 1 | 0.265   | -0.223333 | 0.103333  | 0.245   | 0.21   | 0.294333 |
| HPY0501 | 14779 | HPC | 1 | -0.065  | -0.176667 | -0.003333 | 0.115   | 0.265  | 0.583    |
| HPY0502 | 14780 | HPC | 1 | -0.406  | -1.218333 | -0.493333 | 0.13    | 0.115  | 0.119    |
| HPY0503 | 14781 | HPC | 1 | -0.34   | -0.216667 | 0.046667  | 0.17    | 0.235  | 0.332    |
| HPY0504 | 14782 | HPC | 1 | -1.1625 | -1.7065   | -0.366667 | -0.1595 | -0.13  | 0.58     |
| HPY1736 | 16014 | HPC | 1 | -0.8225 | -0.41     | -0.256667 | -0.1215 | -0.2   | -0.478   |
| HPY0506 | 14784 | HPC | 1 | -0.0135 | -0.083333 | 0.146667  | 0.105   | 0.105  | 0.25     |
| HPY0507 | 14785 | HPC | 1 | -0.21   | -0.48     | -0.05     | 0.075   | 0.385  | 0.383    |
| HPY0508 | 14786 | HPC | 1 | -0.12   | -0.076667 | 0.193333  | 0.285   | 0.3    | 0.343333 |
| HPY0509 | 14787 | HPC | 1 | -0.12   | -0.14     | 0.01      | 0.11    | 0.25   | 0.311333 |
| HPY0510 | 14788 | HPC | 1 | -0.2875 | -0.22     | -0.073333 | 0.118   | 0.23   | 0.424333 |
| HPY0511 | 14789 | HPC | 1 | -0.491  | 0.135     | -0.53     | -0.3    | -2.105 | -1.129   |
| HPY0513 | 14791 | HPC | 1 | -1.4895 | -1.523333 | -0.642333 | -0.4735 | -0.34  | -0.3245  |
| HPY0514 | 14792 | HPC | 1 | 0       | 0.173333  | -0.063333 | 0.64    | 0.275  | 0.483333 |
| HPY0515 | 14793 | HPC | 1 | 0.155   | 0.16      | 0.113333  | 0.275   | 0.18   | 0.418667 |
| HPY0516 | 14794 | HPC | 1 | -0.08   | 0.05      | -0.073333 | 0.3085  | 0.265  | 0.363333 |
| HPY1697 | 15975 | HPC | 1 | 0.0375  | -1.006667 | -0.126667 | 0.105   | 0.19   | 0.782333 |
| HPY0518 | 14796 | HPC | 1 | 0.06    | -0.42     | 0.015     | 0.085   | 0.37   | 0.276667 |
| HPY0519 | 14797 | HPC | 1 | 0.244   | -0.575333 | -0.163333 | -0.1755 | 0.365  | 0.309667 |
| HPY0520 | 14798 | HPC | 1 | 0.0705  | -1.526667 | -1.33     | -1.6985 | 0.23   | 0.171333 |
| HPY0521 | 14799 | HPC | 1 | -1.79   | -2.26     | -2.06     | -3.577  | -0.67  | -0.507   |
| HPY0522 | 14800 | HPC | 1 | 0.4435  | -2.116667 | -2.886667 | -3.21   | -0.015 | 0.142667 |
| HPY0523 | 14801 | HPC | 1 | 0.36    | -2.371    | -3.093333 | -3.249  | -0.115 | 0.054333 |
| HPY0524 | 14802 | HPC | 1 | 0       | -4.006667 | -2.006667 | -2.65   | 0.275  | 0.16     |
| HPY0525 | 14803 | HPC | 1 | -0.08   | -3.673333 | -3.326667 | -6.018  | 0.61   | 0.379667 |
| HPY0526 | 14804 | HPC | 1 | 0.172   | -4.306333 | -2.433333 | -2.307  | 0.38   | 0.18     |
| HPY1753 | 16031 | HPC | 1 | 0.1415  | -2.713333 | -3.02     | -2.896  | -0.01  | 0.394667 |
| HPY0528 | 14806 | HPC | 1 | 0.295   | -2.963333 | -2.796667 | -4.01   | 0.49   | 0.435333 |
| HPY0529 | 14807 | HPC | 1 | 0.4165  | -3.08     | -2.873333 | -3.577  | 0.63   | 0.44     |
| HPY0530 | 14808 | HPC | 1 | 0.035   | -2.583333 | -2.95     | -2.8545 | 0.47   | 0.35     |
| HPY0531 | 14809 | HPC | 1 | 0.28    | -2.93     | -2.57     | -3.1755 | 0.515  | 0.354333 |
| HPY0532 | 14810 | HPC | 1 | 0.28    | -3.126667 | -2.843667 | -4.425  | 0.565  | 0.439    |
| HPY0534 | 14812 | HPC | 1 | 0.199   | -3.246667 | -2.986667 | -2.44   | 0.365  | 0.262667 |
| HPY0535 | 14813 | HPC | 1 | 0.229   | -3.076667 | -2.941667 | -4.464  | 0.28   | 0.343333 |
| HPY0536 | 14814 | HPC | 1 | -0.74   | -3.98     | -4.857667 | -5.5295 | 0.185  | 0.173    |
| HPY0537 | 14815 | HPC | 1 | 0.432   | -4.032333 | -3.218    | -3.72   | 0.385  | 0.413333 |
| HPY0538 | 14816 | HPC | 1 | 0.43    | -3.363333 | -3.316667 | -3.7    | 0.335  | 0.308667 |
| HPY0539 | 14817 | HPC | 1 | 0.345   | -2.633333 | -3.083333 | -3.85   | 0.605  | 0.35     |
| HPY0540 | 14818 | HPC | 1 | 0.2635  | -2.52     | -2.986667 | -4.0405 | 0.485  | 0.565    |
| HPY1714 | 15992 | HPC | 1 | -0.0805 | -3.376667 | -3.196667 | -3.629  | 0.005  | 0.335    |
| HPY0542 | 14820 | HPC | 1 | -0.111  | -2.813    | -3.012333 | -3.3055 | 0.215  | 0.253333 |
| HPY0543 | 14821 | HPC | 1 | -0.085  | -2.203    | -2.2      | -3.535  | 0.195  | 0.367    |
| HPY0544 | 14822 | HPC | 1 | 0.17    | -2.92     | -2.696667 | -3.38   | 0.32   | 0.340667 |
| HPY0545 | 14823 | HPC | 1 | -0.04   | -2.816667 | -2.5      | -3.448  | 0.225  | 0.218667 |
| HPY0546 | 14824 | HPC | 1 | -0.095  | -2.92     | -2.443    | -3.9545 | 0.07   | -0.441   |
| HPY1758 | 16036 | HPC | 1 | -0.11   | -2.656667 | -2.876667 | -3.68   | -0.34  | 0.525    |
| HPY0548 | 14826 | HPC | 1 | -2.227  | -1.506667 | -1.62     | 0.676   | -0.32  | 0.085    |

|         |       |     |   |         |           |           |         |        |           |
|---------|-------|-----|---|---------|-----------|-----------|---------|--------|-----------|
| HPY0549 | 14827 | HPC | 1 | -0.08   | -0.239333 | -0.18     | 0.07    | 0.275  | 0.11      |
| HPY0550 | 14828 | HPC | 1 | 0.0655  | 0.036667  | -0.069    | -0.035  | 0.455  | 0.196667  |
| HPY0551 | 14829 | HPC | 1 | 0.205   | -0.3      | -0.2      | -0.243  | 0.28   | -0.025667 |
| HPY0552 | 14830 | HPC | 1 | 0.535   | -0.236667 | 0.19      | 0.31    | -0.155 | 0.066667  |
| HPY0553 | 14831 | HPC | 1 | 0.16    | -0.23     | -0.116667 | -0.095  | -0.26  | -0.054667 |
| HPY0554 | 14832 | HPC | 1 | 0.11    | -0.023333 | -0.023333 | 0.645   | -0.66  | -0.196667 |
| HPY1710 | 15988 | HPC | 1 | -0.235  | -0.016667 | -0.036667 | 0.065   | 0.095  | 0.159333  |
| HPY0556 | 14834 | HPC | 1 | 0.265   | 0.37      | -0.096667 | 0.455   | 0.315  | 0.455333  |
| HPY0557 | 14835 | HPC | 1 | -0.105  | 0.03      | -0.026667 | -0.5525 | 0.29   | 0.501667  |
| HPY0558 | 14836 | HPC | 1 | -0.21   | -0.11     | -0.12     | 0.105   | -0.035 | -0.12     |
| HPY0559 | 14837 | HPC | 1 | 0.3225  | -0.07     | -0.046667 | 0.18    | -0.725 | -0.413333 |
| HPY0560 | 14838 | HPC | 1 | -0.26   | 0.059     | -0.172    | -0.04   | 0.77   | 0.158     |
| HPY0561 | 14839 | HPC | 1 | 0.339   | -0.286667 | -0.05     | 0.135   | 0.475  | 0.63      |
| HPY0562 | 14840 | HPC | 1 | -0.918  | -0.7385   | -0.49     | 0       | 0      | 0.01      |
| HPY0563 | 14841 | HPC | 1 | -0.125  | 0.136667  | -0.156667 | 0.15    | 0.135  | -0.1945   |
| HPY0564 | 14842 | HPC | 1 | 0.286   | 0.409     | 0         | 0.16    | 0.105  | 0.2       |
| HPY0565 | 14843 | HPC | 1 | 0.07    | 0.19      | 0.24      | 0.49    | 0.17   | 0.283333  |
| HPY0566 | 14844 | HPC | 1 | 0.3025  | -0.203333 | 0.021667  | 0.32    | -0.275 | 0.096667  |
| HPY0567 | 14845 | HPC | 1 | 0.51    | 0.223333  | 0.25      | 0.755   | -0.04  | 0.16      |
| HPY0568 | 14846 | HPC | 1 | -0.145  | -0.39     | -0.073333 | 0.26    | 0.055  | 0.183333  |
| HPY0569 | 14847 | HPC | 1 | -0.225  | -0.123333 | -0.056667 | 0.18    | 0.295  | 0.479667  |
| HPY0570 | 14848 | HPC | 1 | 0.225   | -0.073333 | 0.006667  | 0.31    | 0.22   | 0.522     |
| HPY0572 | 14850 | HPC | 1 | 0.439   | -0.066667 | 0.045     | 0.49    | 0.15   | 0.436667  |
| HPY0573 | 14851 | HPC | 1 | 0.571   | -0.131    | 0.107     | 0.585   | 0.525  | 0.495333  |
| HPY0574 | 14852 | HPC | 1 | -0.3645 | -0.470333 | -0.11     | 0.14    | -0.035 | 0.123     |
| HPY0575 | 14853 | HPC | 1 | 0.155   | 0.213333  | 0.233333  | 0.39    | 0.35   | 0.41      |
| HPY0576 | 14854 | HPC | 1 | 0.185   | 0.273333  | 0.063333  | 0.6     | 0.065  | 0.218667  |
| HPY0577 | 14855 | HPC | 1 | 0.315   | 0.196667  | 0.22      | 0.34    | 0.43   | 0.353333  |
| HPY0578 | 14856 | HPC | 1 | -0.105  | 0.153333  | 0.098     | 0.11    | 0.13   | 0.19      |
| HPY0579 | 14857 | HPC | 1 | 0.015   | -0.17     | -0.056667 | -0.064  | 0.175  | 0.07      |
| HPY0580 | 14858 | HPC | 1 | 0.18    | -0.07     | 0.036667  | 0.2165  | 0.015  | 0.29      |
| HPY0581 | 14859 | HPC | 1 | 0.175   | 0.063333  | 0.05      | -0.147  | 0.1    | 0.395     |
| HPY0582 | 14860 | HPC | 1 | 0.205   | 0.223333  | 0.11      | 0.19    | 0.275  | 0.310333  |
| HPY0583 | 14861 | HPC | 1 | 0.35    | -0.083333 | -0.07     | -0.06   | -0.12  | -0.013333 |
| HPY0584 | 14862 | HPC | 1 | 0.12    | -0.143333 | -0.176667 | 0.065   | 0.26   | 0.287667  |
| HPY0585 | 14863 | HPC | 1 | 0.39    | 0.086667  | 0.233333  | 0.159   | 0.13   | 0.346667  |
| HPY0586 | 14864 | HPC | 1 | 0.015   | -0.09     | 0.11      | 0.2     | -0.165 | 0.575     |
| HPY0587 | 14865 | HPC | 1 | -0.08   | -0.216667 | -0.093333 | 0.1475  | 0.425  | 0.422667  |
| HPY0588 | 14866 | HPC | 1 | 0.175   | -0.066333 | 0.306333  | 0.665   | 0.67   | 0.718667  |
| HPY0589 | 14867 | HPC | 1 | -0.13   | -0.136667 | -0.163333 | 0.02    | 0.275  | 0.333333  |
| HPY0590 | 14868 | HPC | 1 | 0.417   | 0.043333  | 0.096667  | 0.48    | 0.45   | 0.589     |
| HPY0591 | 14869 | HPC | 1 | -0.015  | 0.18      | 0.123333  | 0.55    | -0.005 | 0.313333  |
| HPY1601 | 15879 | JHF | 1 | 0.147   | -0.183333 | 0.219     | -2.875  | 1.27   | 0.62      |
| HPY1762 | 16040 | HPC | 1 | -2.269  | -1.583333 | -1.506667 | 0.87    | -2.405 | -1.294    |
| HPY0593 | 14871 | HPC | 1 | -1.685  | -2.036667 | -1.9      | -0.057  | -3.01  | -1.76     |
| HPY0594 | 14872 | HPC | 1 | 0.079   | -0.063333 | -0.876667 | 0.23    | -0.325 | -0.03     |
| HPY0595 | 14873 | HPC | 1 | -0.32   | -0.08     | 0.04      | 0.14    | 0.175  | 0.343333  |
| HPY0596 | 14874 | HPC | 1 | 0.0365  | 0.053333  | 0.29      | 0.532   | 0.18   | 0.494333  |
| HPY0597 | 14875 | HPC | 1 | 0.285   | -0.036667 | 0.136667  | 0.375   | 0.25   | 0.091333  |
| HPY0598 | 14876 | HPC | 1 | 0.045   | -0.21     | -0.002333 | 0.12    | 0.085  | 0.235     |
| HPY1776 | 16054 | HPC | 1 | -0.609  | -0.763333 | -0.334    | 0.43    | 0.08   | 0.188     |
| HPY0600 | 14878 | HPC | 1 | -0.45   | -0.41     | 0.053333  | 2.83    | 0.06   | 0.123     |
| HPY0601 | 14879 | HPC | 1 | -0.01   | 0.056667  | 0.25      | 0.269   | 0.46   | 0.574     |
| HPY0602 | 14880 | HPC | 1 | -0.092  | -0.693333 | -0.15     | 0.17    | -0.08  | 0.311     |
| HPY0603 | 14881 | HPC | 1 | -0.34   | -0.293333 | 0.025667  | 0.215   | 0.315  | 0.17      |

|         |           |   |         |           |           |         |        |           |
|---------|-----------|---|---------|-----------|-----------|---------|--------|-----------|
| HPY0604 | 14882 HPC | 1 | -0.368  | -0.08     | -0.14     | -0.12   | 0.295  | 0.18      |
| HPY0605 | 14883 HPC | 1 | 0.23    | 0.11      | 0.236667  | 0.295   | 0.5    | 0.443333  |
| HPY0606 | 14884 HPC | 1 | -0.31   | 0.036667  | 0.043333  | 0.37    | 0.195  | 0.3345    |
| HPY0607 | 14885 HPC | 1 | -0.175  | 0.016667  | 0.043333  | 0.122   | 0.2    | 0.279333  |
| HPY0608 | 14886 HPC | 1 | -0.2    | -0.053333 | -0.226667 | -0.3    | 0.05   | 0.303     |
| HPY1757 | 16035 HPC | 1 | -0.6245 | 0.003333  | -0.023    | 0.125   | -0.25  | 0.246     |
| HPY1754 | 16032 HPC | 1 | -0.06   | 0.09      | -0.046667 | 0.2215  | -0.345 | 0.424333  |
| HPY0611 | 14889 HPC | 1 | -0.065  | 0.186667  | -0.001    | 0.17    | 0.65   | 0.703667  |
| HPY0612 | 14890 HPC | 1 | 0.095   | -0.206667 | 0.066667  | -0.051  | 0.67   | 0.25      |
| HPY0613 | 14891 HPC | 1 | 0.12    | -0.113333 | 0.043333  | 0.3415  | 0.39   | 0.635     |
| HPY0614 | 14892 HPC | 1 | -0.0485 | -0.24     | -0.077333 | 0.3385  | -0.295 | 0.114     |
| HPY0615 | 14893 HPC | 1 | -0.025  | -0.08     | 0.124667  | 0.12    | 0.23   | 0.195667  |
| HPY0616 | 14894 HPC | 1 | -0.391  | -0.031    | 0.01      | 0.267   | 0.37   | -0.025    |
| HPY0617 | 14895 HPC | 1 | 0.015   | -0.076667 | 0.03      | -0.05   | 0.145  | 0.274333  |
| HPY0618 | 14896 HPC | 1 | -0.035  | -0.546667 | -0.159    | -0.335  | 0.09   | 0.069333  |
| HPY1602 | 15880 JHF | 1 | 0.1625  | -0.335667 | -0.116667 | -0.63   | 0.995  | 0.771     |
| HPY0619 | 14897 HPC | 1 | 0.025   | -0.49     | -0.083    | 0.3855  | -0.11  | -0.435    |
| HPY0620 | 14898 HPC | 1 | -0.175  | -0.24     | -0.396667 | 0.03    | 0.065  | 0.42      |
| HPY0621 | 14899 HPC | 1 | 0.065   | -0.1      | 0.036667  | 0.075   | 0.045  | 0.313333  |
| HPY0622 | 14900 HPC | 1 | -0.41   | 0.044667  | 0.758     | 0.38    | 0.35   | 0.311333  |
| HPY0623 | 14901 HPC | 1 | 0.015   | 0.083333  | 0.03      | 0.23    | 0.185  | 0.250333  |
| HPY0624 | 14902 HPC | 1 | 0.19    | -0.093333 | -0.013333 | 0.14    | -0.075 | 0.392     |
| HPY0625 | 14903 HPC | 1 | 0.085   | 0.02      | 0.11      | -0.02   | 0.375  | 0.296667  |
| HPY0626 | 14904 HPC | 1 | 0.02    | -0.32     | -0.073333 | 0.22    | 0.09   | 0.26      |
| HPY0627 | 14905 HPC | 1 | 0.5795  | -0.096667 | -0.03     | 0.345   | 0.1    | 0.152     |
| HPY0628 | 14906 HPC | 1 | 0.225   | 0.228     | 0.146667  | 0.341   | 0.245  | 0.584667  |
| HPY0629 | 14907 HPC | 1 | -0.3125 | -0.36     | -0.106667 | -0.3    | -0.245 | -0.07     |
| HPY0630 | 14908 HPC | 1 | -0.354  | 0.066667  | -0.093333 | -0.098  | -0.105 | 0.242333  |
| HPY0631 | 14909 HPC | 1 | -0.05   | -0.093333 | -0.053333 | -0.095  | 0.375  | 0.196667  |
| HPY0632 | 14910 HPC | 1 | 0.05    | -0.5      | -0.03     | 0.3565  | 0.15   | 0.316333  |
| HPY0633 | 14911 HPC | 1 | 0.366   | 0.036667  | -0.010333 | 0.245   | 0.035  | -0.07     |
| HPY0634 | 14912 HPC | 1 | -0.0425 | -0.247667 | 0.064333  | 0.22    | 0.245  | 0.416667  |
| HPY0635 | 14913 HPC | 1 | -0.04   | -0.063333 | 0.066667  | 0.005   | 0.215  | 0.462     |
| HPY0636 | 14914 HPC | 1 | -0.375  | 0.113333  | 0.093333  | 0.0575  | 0.225  | 0.188333  |
| HPY1786 | 16064 HPC | 1 | 0.4     | 0.133333  | 0.063333  | 0.0855  | -0.295 | 0.209333  |
| HPY0638 | 14916 HPC | 1 | 0.535   | -0.003333 | 0.256667  | 0.175   | 0.33   | 0.463333  |
| HPY0639 | 14917 HPC | 1 | 0.321   | -0.143333 | -0.03     | 0.38    | 0.33   | 0.656667  |
| HPY0640 | 14918 HPC | 1 | 0.3165  | -0.383333 | -0.08     | 0.0005  | 0.235  | 0.407333  |
| HPY0641 | 14919 HPC | 1 | -0.803  | -0.574667 | -0.226667 | -0.203  | -0.388 | -0.039333 |
| HPY1603 | 15881 JHF | 1 | -0.81   | -0.763333 | -0.270333 | -0.49   | 1.23   | 0.047     |
| HPY0642 | 14920 HPC | 1 | -0.015  | -0.116667 | -0.076667 | -0.3005 | -0.51  | 0.217     |
| HPY1604 | 15882 JHF | 1 | -1.3825 | -0.946667 | -0.507333 | -1.24   | 1.03   | 0.773333  |
| HPY0643 | 14921 HPC | 1 | 0.422   | -0.162333 | 0.186667  | 0.097   | 0.535  | 0.611667  |
| HPY0644 | 14922 HPC | 1 | -0.31   | -0.423    | -0.02     | 0.201   | 0.44   | 0.306667  |
| HPY0645 | 14923 HPC | 1 | 0.155   | -0.18     | 0.046667  | 0.2875  | -0.045 | 0.123333  |
| HPY0646 | 14924 HPC | 1 | 0.135   | -0.153333 | -0.043333 | 0.5155  | 0.315  | 0.267     |
| HPY0647 | 14925 HPC | 1 | -0.29   | -0.133333 | -0.06     | 0.067   | -0.135 | 0.313333  |
| HPY0648 | 14926 HPC | 1 | 0.36    | -0.236667 | 0.013333  | 0.32    | 0.14   | 0.420667  |
| HPY0649 | 14927 HPC | 1 | -0.3    | 0.216667  | 0.073333  | 0.195   | 0.46   | 0.286667  |
| HPY0650 | 14928 HPC | 1 | 0.29    | 0.033333  | 0.256667  | 0.29    | -0.15  | 0.404667  |
| HPY0652 | 14930 HPC | 1 | 0.02    | 0.273333  | 0.16      | 0.5     | -0.055 | 0.270333  |
| HPY0653 | 14931 HPC | 1 | -0.095  | -0.346667 | 0.086667  | -0.03   | 0.51   | 0.12      |
| HPY0654 | 14932 HPC | 1 | -0.04   | -0.25     | -0.263333 | -0.39   | 0.005  | 0.193     |
| HPY0655 | 14933 HPC | 1 | 0.088   | -0.01     | 0.055     | 0.175   | 0.32   | 0.296667  |
| HPY0656 | 14934 HPC | 1 | 0.34    | 0.016667  | 0.066667  | 0.225   | 0.325  | 0.538667  |

|         |       |     |   |         |           |           |         |         |           |
|---------|-------|-----|---|---------|-----------|-----------|---------|---------|-----------|
| HPY0657 | 14935 | HPC | 1 | 0.02    | -0.04     | -0.03     | 0.12    | 0       | 0.179333  |
| HPY1741 | 16019 | HPC | 1 | -0.217  | -0.226667 | -0.182    | 0.264   | -0.06   | 0.18      |
| HPY0659 | 14937 | HPC | 1 | 0.105   | 0.09      | 0.116667  | -0.099  | 0.245   | 0.224333  |
| HPY0660 | 14938 | HPC | 1 | 0.755   | -0.183333 | 0.15      | 0.01    | 0.265   | 0.313333  |
| HPY0661 | 14939 | HPC | 1 | 0.005   | -0.302333 | -0.23     | 0.57    | 0.03    | -0.420333 |
| HPY0662 | 14940 | HPC | 1 | 0.05    | -0.027667 | -0.07     | 0.225   | -0.045  | 0.432333  |
| HPY0663 | 14941 | HPC | 1 | 0.14    | -0.266667 | -0.091    | 0.04    | 0.08    | 0.466667  |
| HPY0664 | 14942 | HPC | 1 | -0.1    | -0.338333 | -0.156667 | 0.17    | 0.34    | 0.226667  |
| HPY0665 | 14943 | HPC | 1 | 0.175   | -0.196667 | -0.07     | -0.305  | 0.205   | 0.366667  |
| HPY0666 | 14944 | HPC | 1 | -0.062  | -0.31     | -0.056667 | -0.043  | -0.045  | 0.069333  |
| HPY0667 | 14945 | HPC | 1 | -1.13   | -0.643333 | -0.413333 | -1.2865 | 0.103   | 0.202333  |
| HPY0668 | 14946 | HPC | 1 | -0.0815 | -0.203333 | 0.045     | 0.54    | -0.225  | 0.003333  |
| HPY1799 | 16077 | HPC | 1 | -0.405  | -0.326667 | -0.176667 | -0.105  | -0.35   | -0.146    |
| HPY0670 | 14948 | HPC | 1 | -1.525  | -0.17     | 0.393333  | 0.925   | -1.825  | -1.206667 |
| HPY0671 | 14949 | HPC | 1 | 0.083   | 0.066667  | -0.03     | 0.45    | 0.295   | 0.223333  |
| HPY0672 | 14950 | HPC | 1 | -0.04   | -0.227333 | 0.013333  | -0.15   | 0.32    | 0.503     |
| HPY1605 | 15883 | JHF | 1 | -2.217  | -1.513333 | -0.967    | -2.225  | 1.085   | -0.983333 |
| HPY0673 | 14951 | HPC | 1 | 0.71    | -1.183333 | -1.351333 | -1.287  | -1.76   | 0.555     |
| HPY0674 | 14952 | HPC | 1 | -1.735  | -1.243333 | -1.603333 | -1.87   | -2.275  | -0.4845   |
| HPY0675 | 14953 | HPC | 1 | -0.045  | -0.468    | -0.173333 | -0.236  | -0.0875 | 0.242     |
| HPY0676 | 14954 | HPC | 1 | 0.06    | -0.32     | 0.016667  | -0.31   | 0.28    | 0.23      |
| HPY0677 | 14955 | HPC | 1 | 0.16    | -0.02     | -0.032333 | 0.295   | 0.045   | 0.3       |
| HPY0679 | 14957 | HPC | 1 | 0.1965  | -0.013333 | 0.15      | -0.11   | 0.225   | 0.389333  |
| HPY0680 | 14958 | HPC | 1 | 0.2695  | 0.126667  | 0.224     | 0.225   | 0.39    | 0.49      |
| HPY0681 | 14959 | HPC | 1 | -0.729  | 0.024333  | 0.068333  | 0.195   | 0.475   | 0.19      |
| HPY0682 | 14960 | HPC | 1 | -0.9505 | -0.474    | -0.563333 | 0.0755  | 0.29    | -0.016667 |
| HPY0683 | 14961 | HPC | 1 | -0.16   | 0.123333  | 0.126667  | 0.045   | 0.22    | 0.266667  |
| HPY0684 | 14962 | HPC | 1 | 0.429   | 0.01      | -0.043    | 0.755   | -0.085  | 0.669667  |
| HPY0685 | 14963 | HPC | 1 | 0.235   | -0.123333 | 0.073333  | -0.063  | 0.225   | 0.222     |
| HPY0686 | 14964 | HPC | 1 | -0.5    | -0.45     | -0.273333 | -0.31   | 0.01    | 0.793333  |
| HPY0687 | 14965 | HPC | 1 | 0.1035  | -0.022333 | -0.27     | -0.63   | -0.1    | -0.524    |
| HPY0688 | 14966 | HPC | 1 | -0.335  | -0.213333 | 0.01      | 0.145   | 0.145   | 0.209333  |
| HPY1748 | 16026 | HPC | 1 | 0.07    | -0.213333 | 0.003333  | 0.631   | 0.045   | 0.285     |
| HPY0690 | 14968 | HPC | 1 | -0.516  | -0.193333 | -0.2      | 0.211   | -0.045  | 0.159667  |
| HPY0691 | 14969 | HPC | 1 | -0.515  | 0.38      | 0.013333  | 0.305   | 0.175   | 0.268     |
| HPY1698 | 15976 | HPC | 1 | -0.16   | -0.036667 | -0.093333 | 0.355   | 0.085   | 0.612333  |
| HPY0693 | 14971 | HPC | 1 | -0.115  | -0.08     | -0.01     | 0.23    | 0.1     | 0.521667  |
| HPY0694 | 14972 | HPC | 1 | 0.375   | -0.203333 | -0.05     | 0.045   | 0.225   | 0.383333  |
| HPY0695 | 14973 | HPC | 1 | -0.1765 | -0.028    | -0.086667 | 0.56    | 0.075   | 0.44      |
| HPY0696 | 14974 | HPC | 1 | -0.05   | 0.093333  | 0.18      | 0.825   | 0.205   | 0.428     |
| HPY0697 | 14975 | HPC | 1 | -0.09   | 0.346667  | 0.083333  | 0.5755  | 0.35    | 0.837333  |
| HPY1606 | 15884 | JHF | 1 | -2.775  | -1.686667 | -1.193333 | 0.115   | 1.25    | 0.729     |
| HPY1607 | 15885 | JHF | 1 | -2.81   | -1.29     | -1.253333 | 0.1035  | 1.12    | 0.624     |
| HPY0699 | 14977 | HPC | 1 | -0.117  | -0.253333 | -0.996667 | -0.075  | 0.1     | 0.375     |
| HPY0700 | 14978 | HPC | 1 | -0.35   | 0.066667  | -0.176667 | -0.213  | -0.17   | -0.3035   |
| HPY0701 | 14979 | HPC | 1 | -0.105  | 0.083333  | -0.006667 | 0.139   | 0.045   | -0.041    |
| HPY0702 | 14980 | HPC | 1 | -0.18   | -0.253333 | -0.18     | 0.13    | -0.415  | 0.2395    |
| HPY0703 | 14981 | HPC | 1 | 0.04    | -0.073333 | -0.136667 | 0.14    | 0.39    | 0.363333  |
| HPY1766 | 16044 | HPC | 1 | -0.119  | -0.09     | -0.025667 | 0.515   | 0.235   | 0.331     |
| HPY0706 | 14984 | HPC | 1 | 0.0265  | 0.113333  | 0.159667  | 0.53    | 0.405   | 0.44      |
| HPY0707 | 14985 | HPC | 1 | 0.015   | -0.25     | 0.12      | 0.0135  | 0.17    | 0.289667  |
| HPY0708 | 14986 | HPC | 1 | 0.605   | 0.023333  | -0.04     | 0.23    | -0.47   | 0.4455    |
| HPY0709 | 14987 | HPC | 1 | -0.181  | -0.373333 | -0.176667 | -0.43   | -0.19   | 0.06      |
| HPY0710 | 14988 | HPC | 1 | -0.2975 | 0.15      | 0.153333  | -0.37   | 0.22    | -0.222667 |
| HPY0711 | 14989 | HPC | 1 | 0.26    | 0.043333  | 0.273333  | 0.3     | 0.15    | 0.43      |

|         |           |   |         |           |           |         |        |           |
|---------|-----------|---|---------|-----------|-----------|---------|--------|-----------|
| HPY0712 | 14990 HPC | 1 | -1.488  | -1.253333 | -0.543333 | 0.638   | 0.355  | 0.54      |
| HPY0713 | 14991 HPC | 1 | -2.707  | -1.615    | -1.249667 | 0.3925  | -0.09  | -0.1505   |
| HPY0714 | 14992 HPC | 1 | 0.14    | -0.353333 | 0.083333  | 0.36    | 0.395  | 0.493667  |
| HPY0715 | 14993 HPC | 1 | 0.154   | -0.266667 | 0.013333  | 0.215   | 0.465  | 0.313     |
| HPY0716 | 14994 HPC | 1 | -0.015  | -0.257333 | -0.023333 | -0.12   | 0.16   | 0.384667  |
| HPY0717 | 14995 HPC | 1 | -0.3    | -0.136667 | -0.16     | -0.19   | 0.065  | 0.363333  |
| HPY0718 | 14996 HPC | 1 | 0.12    | -0.23     | -0.143333 | -0.112  | 0.06   | 0.636     |
| HPY0719 | 14997 HPC | 1 | 0.635   | -0.34     | 0.013333  | 0.1345  | -0.065 | 0.456     |
| HPY0720 | 14998 HPC | 1 | 0.282   | -0.21     | -0.14     | -0.12   | 0.315  | -0.155333 |
| HPY0721 | 14999 HPC | 1 | -0.815  | 0.103333  | 0.186667  | -0.745  | 0.495  | 0.32      |
| HPY0722 | 15000 HPC | 1 | -1.9    | -0.327    | -0.046667 | -2.05   | 0.32   | -1.317667 |
| HPY0723 | 15001 HPC | 1 | -0.2    | -0.003333 | -0.21     | -0.33   | 0.155  | 0.27      |
| HPY0724 | 15002 HPC | 1 | 0.004   | 0.4       | -0.002667 | 0.3     | -0.015 | 0.299     |
| HPY0725 | 15003 HPC | 1 | 0.5085  | 0.023333  | 2.31E-18  | -0.06   | -0.255 | 0.194667  |
| HPY0726 | 15004 HPC | 1 | -0.01   | -0.003333 | 0.003333  | 0.12    | 0.05   | 0.216667  |
| HPY0727 | 15005 HPC | 1 | 0.065   | 0.026667  | 0.093333  | 0.1     | 0.165  | 0.25      |
| HPY0728 | 15006 HPC | 1 | 0.105   | -0.073333 | 0.103333  | -0.245  | 0.315  | 0.18      |
| HPY0729 | 15007 HPC | 1 | 0.235   | -0.13     | 0.19      | -0.05   | 0.24   | 0.233333  |
| HPY0730 | 15008 HPC | 1 | -0.319  | 0.588     | 0.176667  | 0.5225  | -0.75  | -0.46     |
| HPY0731 | 15009 HPC | 1 | -0.69   | -0.37     | -0.19     | -0.1765 | -0.265 | 0.191333  |
| HPY0733 | 15011 HPC | 1 | -2.448  | -0.083333 | 0.07      | -0.43   | -1.03  | 0.2665    |
| HPY0734 | 15012 HPC | 1 | -0.41   | -0.243333 | -0.32     | -0.03   | 0.11   | 0.262333  |
| HPY0735 | 15013 HPC | 1 | 0.05    | 0.15      | 0.136333  | 0.325   | -0.09  | 0.5       |
| HPY0736 | 15014 HPC | 1 | -0.22   | 0.123333  | -0.076667 | 0.009   | 0.105  | 0.1       |
| HPY0737 | 15015 HPC | 1 | 0.0825  | -0.25     | -0.031333 | 0.125   | -0.04  | 0.196667  |
| HPY0738 | 15016 HPC | 1 | -0.2    | -0.093333 | -0.07     | 0.0135  | 0.305  | 0.315667  |
| HPY0739 | 15017 HPC | 1 | -0.075  | -0.436667 | 0.066667  | 0.095   | 0.655  | 0.243333  |
| HPY0740 | 15018 HPC | 1 | 0.24    | 0.046667  | 0.08      | -0.075  | 0.235  | 0.486667  |
| HPY0741 | 15019 HPC | 1 | 0.1755  | -0.223333 | 0.06      | -0.32   | 0.19   | 0.642     |
| HPY0742 | 15020 HPC | 1 | 0.11    | 0.31      | 0.256667  | 0.295   | 0.495  | 0.64      |
| HPY0743 | 15021 HPC | 1 | -0.2    | 0.033333  | 0.02      | 0.225   | 0.22   | 0.471667  |
| HPY0744 | 15022 HPC | 1 | -0.705  | -0.296667 | -0.193333 | -1.0325 | -0.36  | 0.046667  |
| HPY0745 | 15023 HPC | 1 | 0.035   | 0.143333  | 0.17      | 0.0805  | 0.28   | 0.476333  |
| HPY0746 | 15024 HPC | 1 | 0.1     | 0.41      | 0.233333  | 0.605   | 0.155  | 0.397333  |
| HPY0747 | 15025 HPC | 1 | 0.108   | -0.273333 | 0.089333  | 0.05    | 0.16   | 0.153333  |
| HPY0748 | 15026 HPC | 1 | 0.47    | 0.21      | 0.19      | 0.215   | 0.31   | 0.306667  |
| HPY0749 | 15027 HPC | 1 | 0.19    | 0.016667  | 0.126667  | 0.01    | 0.02   | 0.33      |
| HPY0750 | 15028 HPC | 1 | 0.255   | 0.043333  | 0.028     | 0.3075  | 0.085  | 0.46      |
| HPY0751 | 15029 HPC | 1 | -0.08   | -0.043333 | 0.136667  | 0.3605  | 0.505  | 0.334333  |
| HPY0752 | 15030 HPC | 1 | 0.07    | -0.04     | -0.016667 | 0.255   | 0.21   | 0.523333  |
| HPY0753 | 15031 HPC | 1 | 0.02    | -0.216667 | -0.057667 | 0.445   | 0.33   | 0.572667  |
| HPY0754 | 15032 HPC | 1 | -0.1355 | -0.433    | -0.12     | -0.22   | 0.04   | 0.08      |
| HPY0755 | 15033 HPC | 1 | 0.215   | -0.243333 | -0.008333 | 0.19    | 0.285  | 0.293333  |
| HPY0756 | 15034 HPC | 1 | -0.1205 | -0.202    | 0.106667  | 0.06    | -0.275 | -0.1      |
| HPY0757 | 15035 HPC | 1 | 0.245   | 0.056667  | 0.16      | 0.13    | 0.19   | 0.4       |
| HPY0758 | 15036 HPC | 1 | 0.43    | 0.5       | 0.25      | 0.31    | 0.15   | 0.6       |
| HPY0759 | 15037 HPC | 1 | 0.36    | 0.23      | 0.103333  | 0.21    | 0.12   | 0.512     |
| HPY0760 | 15038 HPC | 1 | 0.075   | 0.213333  | 0.043333  | 0.35    | 0.245  | 0.42      |
| HPY0761 | 15039 HPC | 1 | 0.0285  | -0.006667 | 0.089     | 0.25    | 0.11   | 0.106667  |
| HPY0762 | 15040 HPC | 1 | -0.091  | -0.391    | -0.139333 | -0.468  | -0.345 | -0.067    |
| HPY0763 | 15041 HPC | 1 | 0.185   | 0.183333  | 0.09      | -0.185  | 0.25   | 0.383333  |
| HPY0764 | 15042 HPC | 1 | -0.285  | -0.346667 | -0.473333 | -1.13   | -0.815 | -0.035    |
| HPY0765 | 15043 HPC | 1 | -3.37   | -1.257333 | -1.85     | -2.8585 | -1.115 | -1.828667 |
| HPY1722 | 16000 HPC | 1 | -2.09   | -1.576667 | -1.383333 | -2.383  | -2.191 | -0.902    |
| HPY0767 | 15045 HPC | 1 | -0.322  | -1.395    | -0.695    | -1.53   | -0.54  | 0.13      |

|         |           |   |         |           |           |         |         |           |
|---------|-----------|---|---------|-----------|-----------|---------|---------|-----------|
| HPY0768 | 15046 HPC | 1 | 0.3685  | -0.146667 | 0.085     | 0.229   | 0       | 0.206667  |
| HPY0769 | 15047 HPC | 1 | 0.2035  | -0.56     | -0.048333 | 0.45    | -0.045  | 0.133333  |
| HPY0770 | 15048 HPC | 1 | 0.415   | 0.093333  | 0.186667  | 0.305   | 0.065   | 0.233333  |
| HPY0771 | 15049 HPC | 1 | 0.217   | 0.243333  | 0.263333  | 0.72    | -0.11   | 0.379333  |
| HPY0772 | 15050 HPC | 1 | -0.24   | -0.093333 | 0.023333  | 0.14    | -0.116  | 0.51      |
| HPY0773 | 15051 HPC | 1 | 0.105   | 0.096667  | 0.173667  | 0.28    | 0.32    | 0.485333  |
| HPY0774 | 15052 HPC | 1 | -0.08   | -0.15     | 0.06      | 0.125   | 0.135   | 0.36      |
| HPY0775 | 15053 HPC | 1 | -0.005  | -0.006667 | -0.446667 | 0.136   | 0.265   | 0.186     |
| HPY0776 | 15054 HPC | 1 | 0.0725  | -0.034667 | 0.123333  | 0.85    | -0.65   | -0.261    |
| HPY0777 | 15055 HPC | 1 | -0.09   | -0.31     | -0.1      | 0.14    | 0.345   | 0.46      |
| HPY0778 | 15056 HPC | 1 | -0.591  | -0.676333 | -0.156667 | -0.04   | 0.37    | 0.37      |
| HPY1771 | 16049 HPC | 1 | -0.11   | 0.036667  | 0.036667  | 0.07    | 0.165   | 0.05      |
| HPY0780 | 15058 HPC | 1 | -0.255  | -0.106667 | 0.09      | 0.6     | -0.355  | -0.002333 |
| HPY0781 | 15059 HPC | 1 | -0.1    | -0.256667 | 0.033333  | 0.311   | -0.295  | 0.152333  |
| HPY0782 | 15060 HPC | 1 | 0.09    | -0.003333 | 0.15      | 0.402   | -0.405  | 0.623     |
| HPY0783 | 15061 HPC | 1 | -0.51   | -0.736667 | -0.21     | 0.212   | 0.125   | 0.312333  |
| HPY0784 | 15062 HPC | 1 | -0.56   | -0.376667 | -0.263    | 0.12    | 0.135   | -0.289    |
| HPY0785 | 15063 HPC | 1 | 0.29    | -0.37     | -0.006667 | 0.14    | -0.27   | 0.704667  |
| HPY1769 | 16047 HPC | 1 | -0.0455 | -0.11     | -0.161    | 0.25    | 0.095   | 0.083667  |
| HPY0787 | 15065 HPC | 1 | 0.283   | -0.11     | 0.130333  | 0.36    | 0.465   | 0.646667  |
| HPY0788 | 15066 HPC | 1 | -0.15   | 0.086667  | 0.03      | 0.4265  | 0.095   | 0.451667  |
| HPY0789 | 15067 HPC | 1 | -0.661  | -0.42     | -0.406667 | -0.467  | -0.515  | -0.146    |
| HPY0790 | 15068 HPC | 1 | 0.4665  | -0.05     | 0.225     | -0.7165 | -0.435  | 0.184     |
| HPY1608 | 15886 JHF | 1 | -0.304  | -0.796667 | -0.53     | -1.22   | 1.05    | -0.552333 |
| HPY0791 | 15069 HPC | 1 | -0.03   | -0.089667 | -0.24     | 0.14    | -0.255  | -0.37     |
| HPY0792 | 15070 HPC | 1 | 0.36    | -0.273333 | 0.216667  | 0.28    | 0.435   | 0.503667  |
| HPY0793 | 15071 HPC | 1 | -0.255  | -0.163667 | 0.066667  | 0.3     | 0.425   | 0.482667  |
| HPY0794 | 15072 HPC | 1 | 0.175   | 0.153333  | 0.14      | 0.745   | 0.07    | 0.353333  |
| HPY0795 | 15073 HPC | 1 | 0.25    | -0.283333 | 0.11      | 0.075   | 0.05    | 0.037333  |
| HPY0796 | 15074 HPC | 1 | 0.005   | 0.226667  | -0.573333 | 0.393   | 0.065   | 0.213333  |
| HPY0797 | 15075 HPC | 1 | 0.095   | -0.156667 | 0.186667  | 0.3     | 0.17    | 0.041333  |
| HPY0798 | 15076 HPC | 1 | 0.205   | -0.393333 | 0.216     | 0.53    | 0.08    | 0.738667  |
| HPY0799 | 15077 HPC | 1 | -0.066  | -0.153333 | -0.246667 | 0.1705  | -0.1475 | 0.27      |
| HPY0800 | 15078 HPC | 1 | -0.1435 | 0.013333  | -0.016667 | 0.3765  | 0.22    | 0.4405    |
| HPY0801 | 15079 HPC | 1 | -0.4835 | -0.02     | -0.186667 | 0.372   | -0.0985 | 0.12      |
| HPY0802 | 15080 HPC | 1 | -0.2095 | -0.174    | -0.099667 | 0.37    | 0.39    | 0.442667  |
| HPY0803 | 15081 HPC | 1 | -0.305  | -0.263333 | -0.176667 | 0.129   | 0.03    | 0.176667  |
| HPY0804 | 15082 HPC | 1 | 0.285   | -0.41     | -0.09     | -0.08   | 0.22    | 0.324333  |
| HPY0805 | 15083 HPC | 1 | -0.1145 | -0.31     | -0.075    | -0.065  | 0.035   | 0.193333  |
| HPY0806 | 15084 HPC | 1 | 0.1205  | -0.676667 | -0.1      | -0.12   | 0.185   | -0.177333 |
| HPY0807 | 15085 HPC | 1 | -0.08   | -0.063333 | 0.026667  | -0.02   | -0.03   | 0.162     |
| HPY0808 | 15086 HPC | 1 | -0.075  | -0.096667 | -0.283333 | 0.02    | -0.12   | 0.213333  |
| HPY1740 | 16018 HPC | 1 | -0.201  | -0.273333 | -0.073333 | -0.6595 | -0.01   | 0.342     |
| HPY0810 | 15088 HPC | 1 | 0.332   | -0.176667 | 0.026667  | 0.004   | 0.245   | 0.322667  |
| HPY0812 | 15090 HPC | 1 | -0.01   | -0.4      | -0.15     | -0.1675 | 0.03    | -0.083333 |
| HPY0813 | 15091 HPC | 1 | 0.025   | -0.14     | 0.02      | 0.215   | 0.13    | 0.491     |
| HPY0814 | 15092 HPC | 1 | 0.06    | -0.236667 | -0.076667 | -0.035  | 0.21    | 0.171     |
| HPY0815 | 15093 HPC | 1 | -0.16   | 0.216667  | 0.08      | 0       | 0.245   | 0.35      |
| HPY1609 | 15887 JHF | 1 | -3.366  | -2.08     | -1.402667 | -3.013  | 1.505   | -1.853333 |
| HPY1610 | 15888 JHF | 1 | -2.32   | -1.776667 | -1.74     | -2.745  | 1.285   | -1.622333 |
| HPY0816 | 15094 HPC | 1 | -0.24   | 0.233333  | 0.08      | 0.08    | 0.455   | 0.501333  |
| HPY0817 | 15095 HPC | 1 | -0.255  | 0.036667  | -0.186667 | 0.2     | 0.22    | 0.176667  |
| HPY0818 | 15096 HPC | 1 | 0.13    | -0.253333 | -0.123333 | -0.008  | 0.2     | 0.145667  |
| HPY0819 | 15097 HPC | 1 | -0.113  | -0.623333 | -0.18     | -0.1155 | -0.085  | -0.2935   |
| HPY0820 | 15098 HPC | 1 | 0.05    | -0.073333 | 0.073333  | 0.29    | 0.015   | 0.226667  |

|         |           |   |         |           |           |         |        |           |
|---------|-----------|---|---------|-----------|-----------|---------|--------|-----------|
| HPY0821 | 15099 HPC | 1 | -0.1475 | -0.419667 | 0.013333  | 0.08    | 0.41   | 0.509     |
| HPY0822 | 15100 HPC | 1 | -0.155  | -0.096667 | 0.033333  | 0.305   | 0.32   | 0.153333  |
| HPY0823 | 15101 HPC | 1 | 0.125   | -0.446667 | 0.023333  | -0.352  | 0.33   | -0.035667 |
| HPY0824 | 15102 HPC | 1 | -0.535  | -0.033333 | 0.133333  | 0.26    | 0.51   | 0.368667  |
| HPY0825 | 15103 HPC | 1 | 0.063   | -0.216667 | -0.091333 | -0.015  | 0.3    | 0.29      |
| HPY0826 | 15104 HPC | 1 | -0.68   | -0.473333 | -0.237667 | -0.03   | -0.155 | -0.22     |
| HPY0827 | 15105 HPC | 1 | 0.355   | -0.176667 | 0.043333  | -0.295  | 0.21   | 0.303333  |
| HPY0828 | 15106 HPC | 1 | 0.315   | 0.31      | 0.283333  | 0.48    | 0.465  | 0.644667  |
| HPY0829 | 15107 HPC | 1 | -0.04   | 0.209     | 0.173     | 0.425   | 0.685  | 0.549333  |
| HPY0830 | 15108 HPC | 1 | -0.05   | -0.136667 | -0.133333 | 0.015   | 0.405  | 0.32      |
| HPY0831 | 15109 HPC | 1 | -0.33   | -0.49     | -0.126667 | -0.105  | 0.135  | 0.324     |
| HPY0832 | 15110 HPC | 1 | -0.325  | -0.31     | -0.173333 | -0.045  | 0.21   | 0.255667  |
| HPY0833 | 15111 HPC | 1 | 0.245   | -0.023333 | -0.179    | 0.125   | -0.014 | 0.307     |
| HPY0834 | 15112 HPC | 1 | 0.17    | -0.006667 | 0.036667  | 0.084   | 0.21   | 0.56      |
| HPY0835 | 15113 HPC | 1 | 0.6135  | 0.19      | 0.193333  | -0.075  | -0.005 | 0.585     |
| HPY0836 | 15114 HPC | 1 | -0.597  | -0.163333 | -0.205333 | 0.715   | -0.02  | 0.173     |
| HPY0837 | 15115 HPC | 1 | 0.601   | 0.266     | -0.081    | -0.301  | -0.125 | -0.14     |
| HPY0838 | 15116 HPC | 1 | 0.175   | 2.89E-18  | 0.213333  | 0.48    | 0.215  | 0.6       |
| HPY0839 | 15117 HPC | 1 | -0.035  | 0.18      | 0.076667  | 0.155   | -0.085 | 0.216667  |
| HPY0840 | 15118 HPC | 1 | 0.207   | 0.293333  | 0.13      | 0.2735  | 0.25   | 0.458     |
| HPY0841 | 15119 HPC | 1 | -0.1615 | -0.2      | 0.023333  | -0.126  | 0.12   | 0.104     |
| HPY0842 | 15120 HPC | 1 | 0.225   | -0.163333 | -0.033333 | -0.1545 | 0.21   | 0.257333  |
| HPY0843 | 15121 HPC | 1 | -0.385  | -0.056667 | 0.036667  | -0.0375 | -0.64  | -0.354    |
| HPY0844 | 15122 HPC | 1 | 0.045   | -0.073333 | 0.153333  | -0.06   | -0.07  | 0.12      |
| HPY0845 | 15123 HPC | 1 | 0.08    | 0.266667  | 0.18      | 0.52    | -0.125 | -0.045667 |
| HPY0846 | 15124 HPC | 1 | -0.0005 | -0.157667 | -0.135    | 0.3875  | -0.265 | -0.123    |
| HPY0848 | 15126 HPC | 1 | -1.8625 | -1.33     | -1.05     | -1.9725 | 0.145  | -1.240333 |
| HPY0849 | 15127 HPC | 1 | -1.06   | -0.564333 | -0.736667 | -0.26   | -0.765 | 0.01      |
| HPY0850 | 15128 HPC | 1 | 0.24    | 0.076667  | 0.073333  | 0.225   | -0.29  | -0.156667 |
| HPY0851 | 15129 HPC | 1 | 0.135   | 0.266667  | 0.095667  | 0.265   | 0.35   | 0.043333  |
| HPY0852 | 15130 HPC | 1 | -0.08   | -0.41     | -0.183333 | 0.04    | 0.075  | 0.291333  |
| HPY0853 | 15131 HPC | 1 | -0.2325 | -0.273333 | -0.23     | -0.049  | 0.21   | -0.06     |
| HPY0854 | 15132 HPC | 1 | -0.48   | -1.01     | -0.33     | -0.0485 | -0.145 | 0.438     |
| HPY0855 | 15133 HPC | 1 | 0.816   | -1.416667 | -2.763667 | 1.353   | -2.6   | -1.297667 |
| HPY0856 | 15134 HPC | 1 | -1.89   | -1.116667 | -1.09     | 1.339   | -2.285 | -1.457    |
| HPY0857 | 15135 HPC | 1 | -0.325  | -0.53     | -0.33     | -0.132  | -0.42  | -0.4255   |
| HPY0858 | 15136 HPC | 1 | -0.124  | -0.09     | -0.06     | 0.235   | -0.2   | 0.221333  |
| HPY0859 | 15137 HPC | 1 | 0.1775  | 0.05      | 0.092333  | 0.175   | -0.22  | 0.203333  |
| HPY0860 | 15138 HPC | 1 | -0.565  | -0.26     | 0.029333  | 0.105   | 0.115  | 0.323333  |
| HPY0861 | 15139 HPC | 1 | -0.145  | 0.08      | 0.036667  | 0.175   | -0.37  | 0.076667  |
| HPY0862 | 15140 HPC | 1 | -0.02   | 0.14      | 0.09      | 0.345   | 0.29   | 0.643333  |
| HPY0863 | 15141 HPC | 1 | 0.355   | -0.243333 | 0.026667  | 0.1025  | 0.315  | 0.280333  |
| HPY0864 | 15142 HPC | 1 | -0.2355 | -0.106667 | -0.183333 | -0.41   | 0.555  | -0.155333 |
| HPY0865 | 15143 HPC | 1 | -0.0365 | 0.16      | 0.068333  | 0.275   | 0.21   | 0.06      |
| HPY0866 | 15144 HPC | 1 | -0.14   | -0.403333 | -0.083333 | 0.0235  | 0.235  | 0.334333  |
| HPY0867 | 15145 HPC | 1 | 0.275   | 2.31E-18  | 0.236667  | 0.015   | 0.475  | 0.493333  |
| HPY0868 | 15146 HPC | 1 | -0.14   | 0.026667  | 0.056667  | 0.3515  | -0.015 | 0.328667  |
| HPY0869 | 15147 HPC | 1 | -0.265  | 0.113333  | -0.103333 | 0.14    | 0.235  | 0.095667  |
| HPY0870 | 15148 HPC | 1 | 0.06    | 0.06      | 0.143333  | 0.3835  | 0.27   | 0.628333  |
| HPY0871 | 15149 HPC | 1 | -0.042  | 0.066667  | 0.111667  | -0.27   | -0.3   | -0.003333 |
| HPY0872 | 15150 HPC | 1 | 0.21    | -0.42     | -0.123333 | -0.309  | -0.415 | -0.012    |
| HPY0873 | 15151 HPC | 1 | 0.4875  | 0.076667  | -0.166667 | -0.3455 | 0.0195 | -0.171    |
| HPY0874 | 15152 HPC | 1 | 0.45    | -0.116667 | 0.2       | 0.262   | 0.05   | 0.035333  |
| HPY0875 | 15153 HPC | 1 | 0.025   | 0.07      | 0.163333  | 0.255   | 0.265  | 0.29      |
| HPY0876 | 15154 HPC | 1 | 0.115   | -0.053333 | 0.1       | 0.225   | 0.245  | 0.273333  |



|         |           |   |         |           |           |         |         |           |
|---------|-----------|---|---------|-----------|-----------|---------|---------|-----------|
| HPY1792 | 16070 HPC | 1 | -0.089  | -0.04     | -0.074667 | 0.03    | 0.22    | 0.499     |
| HPY0878 | 15156 HPC | 1 | 0.41    | -0.22     | 0.07      | 0.06    | -0.765  | 0.16      |
| HPY0879 | 15157 HPC | 1 | 0.001   | -0.2      | 0.018     | -0.06   | 0.295   | 0.176667  |
| HPY1611 | 15889 JHF | 1 | -2.8365 | -1.547333 | -1.202    | -1.6375 | 1.215   | -0.039667 |
| HPY1612 | 15890 JHF | 1 | 1.463   | -0.1155   | -0.77     | -0.14   | 0.45    | 0.45      |
| HPY0880 | 15158 HPC | 1 | -2.3565 | -0.05     | 0.133333  | -1.56   | -2.1485 | -1.4185   |
| HPY0881 | 15159 HPC | 1 | -0.2    | 0.077     | 0.7485    | 0.24    | -0.315  | -1.071    |
| HPY0882 | 15160 HPC | 1 | -2.25   | -0.5115   | -1.549    | -1.3585 | -1.185  | -2.003    |
| HPY0883 | 15161 HPC | 1 | 0.255   | -0.275    | 0.096667  | 0.2     | 0.155   | 0.319667  |
| HPY0884 | 15162 HPC | 1 | 0.06    | -0.136667 | -0.15     | -0.11   | 0.065   | 0.36      |
| HPY0885 | 15163 HPC | 1 | 0.065   | -0.113333 | 0.043333  | -0.17   | 0.185   | 0.103333  |
| HPY0886 | 15164 HPC | 1 | 0.5235  | 0.113333  | 0.231     | 0.16    | 0.295   | 0.22      |
| HPY1756 | 16034 HPC | 1 | -0.53   | -0.296667 | -0.54     | -0.807  | 0.155   | 0.147333  |
| HPY1613 | 15891 JHF | 1 | -1.043  | -1.498667 | -1.19     | -2.385  | 1.19    | 0.578667  |
| HPY0888 | 15166 HPC | 1 | 0.165   | -0.083333 | 0.023333  | 0.125   | 0.355   | 0.403667  |
| HPY0889 | 15167 HPC | 1 | 0.465   | 0.036667  | 0.086667  | 0.18    | 0.045   | 0.414     |
| HPY0890 | 15168 HPC | 1 | 0.198   | -0.136667 | 0.03      | -0.01   | 0.21    | 0.38      |
| HPY0891 | 15169 HPC | 1 | 0.439   | -0.076667 | 0.089333  | 0.085   | -0.06   | 0.286667  |
| HPY0892 | 15170 HPC | 1 | 0.0215  | -0.91     | -0.66     | 0.56    | 0.405   | 0.27      |
| HPY0893 | 15171 HPC | 1 | -0.713  | -0.797    | -1.146667 | 0.0125  | 0.17    | -0.2555   |
| HPY0895 | 15173 HPC | 1 | -0.0015 | -0.670333 | -0.4      | -0.16   | -0.645  | -0.145    |
| HPY0896 | 15174 HPC | 1 | -0.135  | 0.27      | 0.1       | 0.07    | -0.57   | 0.29      |
| HPY0897 | 15175 HPC | 1 | 0.02    | 0.086667  | 0.073333  | 0.2045  | -0.425  | -0.198    |
| HPY1614 | 15892 JHF | 1 | -1.845  | -1.253333 | -0.873333 | 1.13    | 1.22    | 0.277     |
| HPY1615 | 15893 JHF | 1 | 0.44    | -0.593333 | -0.193333 | -2.177  | 0.45    | 0.906667  |
| HPY1616 | 15894 JHF | 1 | -0.2155 | -2.89E-18 | -0.06     | -1.6845 | -0.125  | 0.8625    |
| HPY1617 | 15895 JHF | 1 | 0.179   | 0.169     | 0.14      | 2.06    | 0.8     | 0.495     |
| HPY1618 | 15896 JHF | 1 | -1.375  | -0.648667 | -1.116333 | -0.9    | 0.72    | 0.8325    |
| HPY1619 | 15897 JHF | 1 | -1.675  | -1.206667 | -0.936667 | -1.275  | 0.96    | 0.205     |
| HPY1620 | 15898 JHF | 1 | -1.44   | -0.28     | -0.495    | -1.05   | 0.91    | 0.2       |
| HPY0898 | 15176 HPC | 1 | -0.0805 | 0.04      | 0.066667  | 0.1855  | -0.26   | 0.115667  |
| HPY0899 | 15177 HPC | 1 | -0.1605 | 0.03      | 0.09      | 0.45    | 0.435   | 0.404     |
| HPY0900 | 15178 HPC | 1 | -0.129  | -0.093333 | 0.025333  | -0.115  | 0.075   | 0.256667  |
| HPY0901 | 15179 HPC | 1 | 0.0475  | -0.263667 | -0.303333 | -0.25   | -0.595  | -0.37     |
| HPY0902 | 15180 HPC | 1 | -0.2615 | -0.515333 | -0.412333 | -0.595  | -0.31   | 0.082667  |
| HPY0903 | 15181 HPC | 1 | -0.19   | -0.173333 | -0.136667 | -1.025  | -0.13   | 0.164     |
| HPY0904 | 15182 HPC | 1 | 0.344   | -0.223333 | -0.051333 | -0.115  | 0.16    | 0.186667  |
| HPY1779 | 16057 HPC | 1 | -0.3785 | -0.463333 | -0.304    | -0.17   | -0.41   | 0.161667  |
| HPY0908 | 15186 HPC | 1 | -0.085  | 0.436667  | -0.083333 | 0.12    | 0.085   | 0.4735    |
| HPY0909 | 15187 HPC | 1 | -0.09   | -0.14     | -0.175333 | -0.35   | -0.555  | -0.232    |
| HPY0910 | 15188 HPC | 1 | 0.095   | -0.113333 | 0.073333  | -0.02   | 0.235   | 0.399333  |
| HPY0911 | 15189 HPC | 1 | -0.1465 | 0.368     | -0.005    | 0.205   | 0.075   | -0.125    |
| HPY0912 | 15190 HPC | 1 | -0.069  | 0.116667  | 0.08      | 0.22    | 0.44    | 0.51      |
| HPY0913 | 15191 HPC | 1 | -0.04   | 0.426667  | 0.2       | 0.48    | 0.25    | 0.462     |
| HPY0914 | 15192 HPC | 1 | 0.01    | 0.06      | 0.086667  | 0.355   | 0.37    | 0.313333  |
| HPY0915 | 15193 HPC | 1 | 0.0415  | -0.01     | -0.076667 | 0.0275  | 0.07    | 0.4155    |
| HPY0916 | 15194 HPC | 1 | 0.04    | 0.237667  | 0.156667  | 0.055   | 0.035   | 0.476667  |
| HPY0917 | 15195 HPC | 1 | -0.162  | -0.249    | -0.513333 | 0.39    | -0.835  | -0.132    |
| HPY1738 | 16016 HPC | 1 | -0.31   | -0.494    | -0.12     | -0.06   | -0.065  | 0.0975    |
| HPY1760 | 16038 HPC | 1 | -0.135  | -0.04     | 0.003333  | 0.135   | 0.03    | 0.221667  |
| HPY0920 | 15198 HPC | 1 | -0.1    | 0.033333  | 0.023333  | -0.02   | 0.295   | 0.285     |
| HPY0921 | 15199 HPC | 1 | 0.132   | -0.064    | 0.072333  | -0.065  | 0.145   | 0.18      |
| HPY1755 | 16033 HPC | 1 | -0.26   | -0.1      | -0.176667 | -0.025  | 0.22    | 0.22      |
| HPY0923 | 15201 HPC | 1 | 0.055   | 0.073333  | 0.156667  | 0.31    | -0.34   | -0.016667 |
| HPY0924 | 15202 HPC | 1 | -0.17   | -0.006667 | -0.143333 | -0.01   | -0.195  | 0.2715    |

|         |           |   |         |           |           |         |         |           |
|---------|-----------|---|---------|-----------|-----------|---------|---------|-----------|
| HPY0925 | 15203 HPC | 1 | 0.11    | -0.37     | 0.093333  | -0.33   | 0.105   | 0.283333  |
| HPY0926 | 15204 HPC | 1 | 0.2005  | -0.483667 | -0.077667 | -0.505  | 0.205   | 0.143333  |
| HPY1687 | 15965 HPC | 1 | 0.025   | -0.036667 | 0.003333  | -0.035  | 0.155   | 0.33      |
| HPY0928 | 15206 HPC | 1 | -0.16   | -0.073333 | 0.083333  | 0.05    | 0.645   | 0.15      |
| HPY0929 | 15207 HPC | 1 | 0.025   | 0.12      | 0.266667  | 0.255   | 0.16    | 0.3       |
| HPY0930 | 15208 HPC | 1 | -0.1035 | -0.158667 | 0.115333  | -0.135  | 0.305   | 0.26      |
| HPY0931 | 15209 HPC | 1 | -0.3    | -0.113333 | -0.08     | 0.04    | 0.2735  | -0.015    |
| HPY0932 | 15210 HPC | 1 | -0.11   | 0.25      | 0.03      | 0.11    | -0.1    | 0.6715    |
| HPY0933 | 15211 HPC | 1 | -0.245  | -0.006667 | 0.006667  | -0.4045 | 0.41    | 0.385     |
| HPY0934 | 15212 HPC | 1 | -0.25   | -0.333333 | 0.093333  | -0.18   | 0.275   | 0.155333  |
| HPY0935 | 15213 HPC | 1 | -0.115  | -0.04     | 0.09      | -0.32   | -0.105  | 0.236667  |
| HPY0936 | 15214 HPC | 1 | 0.345   | -0.04     | 0.053333  | -0.0145 | 0.055   | 0.344667  |
| HPY0937 | 15215 HPC | 1 | -0.615  | -0.303333 | 0.04      | 0.11    | -0.12   | -0.216667 |
| HPY0938 | 15216 HPC | 1 | -0.318  | -0.365    | -0.273333 | -0.35   | 0.19    | -0.68     |
| HPY0939 | 15217 HPC | 1 | 0.305   | -0.296667 | 0.013333  | 0.045   | 0.165   | 0.096667  |
| HPY0940 | 15218 HPC | 1 | 0.3885  | -0.14     | 0.053333  | 0.346   | 0.21    | 0.47      |
| HPY0941 | 15219 HPC | 1 | -0.28   | 0.056667  | -0.003333 | 0.29    | 0.02    | 0.1       |
| HPY0942 | 15220 HPC | 1 | 0.375   | 0.053333  | 0.166667  | 0.5     | 0.255   | 0.486667  |
| HPY0943 | 15221 HPC | 1 | 0.065   | -0.154667 | 0.113333  | -0.39   | -0.185  | 0.292     |
| HPY0944 | 15222 HPC | 1 | -0.04   | -0.296667 | -0.039    | 0.16    | 0.145   | 0.015     |
| HPY0945 | 15223 HPC | 1 | -2.6675 | -1.172333 | -1.799    | -1.9935 | -2.165  | -1.745    |
| HPY0946 | 15224 HPC | 1 | 0.12    | 0.153333  | -0.04     | 0.245   | -0.35   | 0.19      |
| HPY0947 | 15225 HPC | 1 | -0.603  | -0.300667 | -0.116667 | -0.285  | 0.03    | 0.211667  |
| HPY0948 | 15226 HPC | 1 | 0.08    | -0.473333 | 0.173333  | 0.215   | 0.28    | 0.323333  |
| HPY0949 | 15227 HPC | 1 | 0.35    | 0.013667  | 0.09      | 0.01    | 0.45    | 0.372     |
| HPY0950 | 15228 HPC | 1 | -0.04   | -0.34     | 0.016667  | 0.04    | 0.23    | 0.28      |
| HPY0951 | 15229 HPC | 1 | 0.285   | 0.01      | 0.153333  | -0.1775 | 0.245   | 0.255667  |
| HPY0952 | 15230 HPC | 1 | -0.375  | 0.286667  | 0.026667  | -0.17   | -0.22   | -0.15     |
| HPY1703 | 15981 HPC | 1 | -0.245  | -0.17     | -0.116667 | -0.5045 | -0.2845 | -0.008333 |
| HPY0954 | 15232 HPC | 1 | -0.2735 | -0.207    | -0.08     | 0.37    | 0.085   | 0.525333  |
| HPY0955 | 15233 HPC | 1 | 0.22    | 0.096667  | 0.201333  | 0.28    | 0.1     | 0.487667  |
| HPY0956 | 15234 HPC | 1 | 0.13    | -0.033333 | 0.126667  | 0.26    | 0.16    | 0.266667  |
| HPY0957 | 15235 HPC | 1 | -0.1065 | -0.046667 | 0.09      | -0.05   | 0.32    | 0.3935    |
| HPY0958 | 15236 HPC | 1 | 0.44    | 0.19      | 0.246667  | 0.27    | 0.16    | 0.489     |
| HPY0959 | 15237 HPC | 1 | -0.065  | 0.153333  | -0.04     | -0.01   | 0.18    | 0.405667  |
| HPY1686 | 15964 HPC | 1 | 0.3145  | 0.116667  | 0.096667  | 0.5685  | -0.08   | 0.129333  |
| HPY0961 | 15239 HPC | 1 | -0.03   | 0.116667  | 0.143333  | 0.11    | 0.3     | 0.246667  |
| HPY1682 | 15960 HPC | 1 | -0.099  | -1.433333 | -1.252333 | -0.321  | -2.75   | -1.013333 |
| HPY1622 | 15900 JHF | 1 | -1.15   | -1.276667 | -0.753333 | -1.48   | 1.42    | -0.48     |
| HPY0963 | 15241 HPC | 1 | -0.195  | -1.974    | -1.633333 | -0.06   | -0.55   | 0.095333  |
| HPY0964 | 15242 HPC | 1 | -1.035  | -1.8      | -1.276667 | 0.237   | -0.72   | 0.127667  |
| HPY0965 | 15243 HPC | 1 | -0.0765 | -1.866667 | -1.543333 | -0.57   | -0.26   | -0.026667 |
| HPY0966 | 15244 HPC | 1 | 0.0165  | -0.599333 | -0.006667 | -0.195  | 0.115   | 0.1665    |
| HPY1746 | 16024 HPC | 1 | -3.6425 | 0.264     | 0.49      | -6.437  | -2.02   | 0.543     |
| HPY0968 | 15246 HPC | 1 | -0.51   | -0.059    | -0.383333 | 0.72    | 0.105   |           |
| HPY1798 | 16076 HPC | 1 | 0.03    | -0.08     | 0.01      | 0.065   | 0.31    | 0.243333  |
| HPY0970 | 15248 HPC | 1 | -0.225  | -0.316667 | -0.009    | -0.055  | 0.38    | 0.156667  |
| HPY0971 | 15249 HPC | 1 | 0.627   | -0.04     | 0.09      | 0.279   | 0.385   | 0.436     |
| HPY0972 | 15250 HPC | 1 | 0.11    | -0.356667 | -0.116667 | -0.48   | 0.19    | 0.063333  |
| HPY0973 | 15251 HPC | 1 | -0.06   | 0.023333  | 0.12      | 0.405   | -0.495  | -0.130333 |
| HPY0974 | 15252 HPC | 1 | 0.2155  | 0.043667  | 0.096667  | 0.3905  | -0.04   | 0.317333  |
| HPY0975 | 15253 HPC | 1 | -1.0545 | -0.127    | -0.223333 | -0.411  | -0.9    | -0.447    |
| HPY0976 | 15254 HPC | 1 | 0.3     | -0.05     | 0.06      | 0.2     | 0.16    | 0.036667  |
| HPY0977 | 15255 HPC | 1 | 0.165   | 0.113333  | 0.160333  | 0.345   | -0.065  | 0.136667  |
| HPY0978 | 15256 HPC | 1 | -0.056  | -0.146667 | 0.023333  | 0.3295  | -0.065  | 0.043333  |

|         |       |     |   |         |           |           |         |         |           |
|---------|-------|-----|---|---------|-----------|-----------|---------|---------|-----------|
| HPY0979 | 15257 | HPC | 1 | 0.32    | 0.13      | 0.08      | 0.0275  | -0.405  | 0.23      |
| HPY1623 | 15901 | JHF | 1 | -2.7745 | -1.338    | -1.32     | -3.36   | 1.44    | 0.887     |
| HPY0980 | 15258 | HPC | 1 | -0.825  | -0.661    | -0.726667 | -0.24   | -1.085  | -0.314    |
| HPY0981 | 15259 | HPC | 1 | -0.46   | -0.316667 | -0.193333 | -0.322  | -0.43   | -0.099667 |
| HPY0982 | 15260 | HPC | 1 | -2.245  | -1.703333 | -1.356667 | -2.98   | -2.695  | -1.712    |
| HPY0983 | 15261 | HPC | 1 | -0.23   | 0.03      | 0.07      | 0.468   | 0.41    | 0.413     |
| HPY1624 | 15902 | JHF | 1 | -0.255  | -0.763333 | -0.2      | -0.19   | 1.37    | -0.326667 |
| HPY1625 | 15903 | JHF | 1 | -3.44   | 0.123333  | 0.533333  | 0.605   | 1.515   | -2.456667 |
| HPY1626 | 15904 | JHF | 1 | -2.9225 | 0.191     | 0.4       | 0.3515  | 1.59    | -1.605    |
| HPY1627 | 15905 | JHF | 1 | -5.5945 | -0.233333 | 0.266667  | 0.1255  | 1.355   | -2.025    |
| HPY1628 | 15906 | JHF | 1 |         | 0.056667  | 0.472333  | 0.11    | 1.35    | -1.843333 |
| HPY1629 | 15907 | JHF | 1 | -3.06   | -0.036667 | 0.353333  | 0.2705  | 1.24    | -1.41     |
| HPY1630 | 15908 | JHF | 1 | -2.6445 | 0.289667  | 0.526667  | 0.46    | 1.54    | -1.894    |
| HPY1631 | 15909 | JHF | 1 | -3.06   | 0.096667  | 0.48      | -0.3005 | 1.2     | -2.516667 |
| HPY1632 | 15910 | JHF | 1 | -1.985  | 0.186667  | 0.446667  | -0.385  | 1.365   | -1.479667 |
| HPY1633 | 15911 | JHF | 1 | 0.121   | 0.316333  | 0.513333  | -1.53   | 1.2795  | 0.66      |
| HPY1634 | 15912 | JHF | 1 | 0.098   | 0.083333  | 0.487333  | -2.385  | 1.385   | 0.506667  |
| HPY1635 | 15913 | JHF | 1 | -0.3275 | 0.080333  | 0.863333  | -0.12   | 1.345   | 0.859667  |
| HPY1752 | 16030 | JHF | 1 | -0.0955 | 1.073333  | 1.033333  | 0.035   | 1.335   | 1.035333  |
| HPY1637 | 15915 | JHF | 1 | -0.785  | 0.556667  | 0.833333  | -1.305  | 1.37    | -0.003333 |
| HPY1638 | 15916 | JHF | 1 | -1.796  | 0.229667  | 0.623333  | -2.513  | 1.365   | -0.405    |
| HPY1639 | 15917 | JHF | 1 | 0.4385  | -0.066667 | 0.69      | -3.243  | 1.495   | -0.152333 |
| HPY1640 | 15918 | JHF | 1 | 0.63    | 0.226667  | 0.743333  | -4.085  | 1.5     | -1.786667 |
| HPY1641 | 15919 | JHF | 1 | 0.375   | 0.31      | 0.73      | -3.36   | 1.52    | -2.173333 |
| HPY1642 | 15920 | JHF | 1 | 0.585   | 0.4       | 0.87      | -3.22   | 1.595   | -1.323333 |
| HPY1643 | 15921 | JHF | 1 | 0.805   | -0.004667 | 0.509     | -3.443  | 1.395   | -0.59     |
| HPY1644 | 15922 | JHF | 1 | 1.045   | 0.263333  | 0.66      | -2.7335 | 1.43    | -0.78     |
| HPY1645 | 15923 | JHF | 1 | -1.2055 | -0.333333 | 0.081667  | -4.1565 | 1.38    | -1.366667 |
| HPY0984 | 15262 | HPC | 1 | -1.95   | -0.336    | -0.761667 | -1.486  | -1.3705 | 0.09      |
| HPY0985 | 15263 | HPC | 1 | -2.163  | -1.1915   | -1.48     | -2.585  | -2.445  | -1.273333 |
| HPY0986 | 15264 | HPC | 1 | -1.885  | -2.096667 | -1.293333 | -3.225  | -2.775  | -0.923333 |
| HPY0987 | 15265 | HPC | 1 | -1.1305 | -1.463    | -1.289    | -2.703  | 0.05    | -2.316333 |
| HPY0988 | 15266 | HPC | 1 | -0.248  | 0.5       | 0.853667  | -2.155  | -2.455  | -1.844    |
| HPY0989 | 15267 | HPC | 1 | -1.245  | 0.586667  | 0.923333  | -3.355  | -2.8    | -2.136667 |
| HPY0990 | 15268 | HPC | 1 | -2.24   | 0.5       | 0.39      | -3.965  | 0.395   | -2.036667 |
| HPY0991 | 15269 | HPC | 1 | -2.43   | -0.056667 | 0.316667  | -4.33   | 0.57    | -2.699    |
| HPY1646 | 15924 | JHF | 1 | -2.401  | -1.489333 | -0.804333 | -4.847  | 1.075   | -2.536667 |
| HPY0992 | 15270 | HPC | 1 | -4.8545 | -0.363333 | 0.203333  | -4.2205 | 0.345   | -2.806333 |
| HPY0993 | 15271 | HPC | 1 | 1.187   | 0.84      | 0.602667  | -3.32   | -1.88   | -1.893333 |
| HPY0994 | 15272 | HPC | 1 | 1.183   | 0.213333  | 0.8       | -3.05   | -1.69   | -1.913    |
| HPY0995 | 15273 | HPC | 1 | -0.07   | -0.203333 | 0.37      | -3.03   | -0.005  | -0.511333 |
| HPY0996 | 15274 | HPC | 1 | -0.045  | -1.57     | -0.935667 | -3.4    | 0.33    | -0.713333 |
| HPY1648 | 15926 | JHF | 1 | 0.305   | -0.196667 | 0.33      | -2.285  | 1.3     | 0.33      |
| HPY1649 | 15927 | JHF | 1 | -0.608  | 0.110667  | 1.003333  | 0.145   | 1.285   | 1.4105    |
| HPY1650 | 15928 | JHF | 1 | -1.112  | 0.47      | 0.64      | -0.05   | 1.14    | 0.04      |
| HPY1651 | 15929 | JHF | 1 | -4.7005 | -0.686667 | -0.39     | -2.8025 | 1.315   | 0.72      |
| HPY1652 | 15930 | JHF | 1 | -3.601  | -1.423    | -1.101    | -1.87   | 1.085   | 0.341     |
| HPY1653 | 15931 | JHF | 1 | -2.94   | -1.936667 | -1.24     | -3.975  | 1.53    | 0.393333  |
| HPY1654 | 15932 | JHF | 1 | -0.9905 | -1.055333 | -0.892667 | -0.22   | 0.705   | -0.115    |
| HPY1655 | 15933 | JHF | 1 | -2.105  | -1.33     | -0.876667 | -2.3165 | 1.11    | 0.425667  |
| HPY0997 | 15275 | HPC | 1 | -1.705  | 0.416667  | 0.946667  | -3.205  | -2.675  | -1.955    |
| HPY0998 | 15276 | HPC | 1 | -0.3655 | 0.476667  | 0.801667  | -2.655  | -2.525  | -1.79     |
| HPY0999 | 15277 | HPC | 1 | 0.825   | 0.556667  | 0.806667  | 0.2     | -1.8    | 0.755     |
| HPY1000 | 15278 | HP1 | 1 | 1.27    | 0.947333  | 0.96      | 1.26    | -2.635  | 1.0415    |
| HPY1001 | 15279 | HP1 | 1 | 1.194   | 1.0865    | 1.157     | 1.34    | -2.69   | 0.61      |

|         |       |     |   |         |           |           |         |        |           |
|---------|-------|-----|---|---------|-----------|-----------|---------|--------|-----------|
| HPY1002 | 15280 | HP1 | 1 | 1.46    | 0.636667  | 1.153333  | 1.135   | -3.25  | 0.986667  |
| HPY1003 | 15281 | HP1 | 1 | 1.367   | 0.626667  | 1.003333  | 1.069   | -2.945 | 0.73      |
| HPY1004 | 15282 | HP1 | 1 | 1.675   | 1.253333  | 1.24      | 1.59    | -3.34  | 0.9       |
| HPY1006 | 15284 | HP1 | 1 | 1.34    | 1.286667  | 1.256667  | 1.475   | -2.63  | 1.663333  |
| HPY1007 | 15285 | HP1 | 1 | 0.335   | -0.34     | -0.03     | -2.07   | -0.39  | 0.683333  |
| HPY1008 | 15286 | HP1 | 1 | 0.235   | -0.096667 | 0.213333  | -2.4665 | -1.295 | 1.259333  |
| HPY1009 | 15287 | HP1 | 1 | -1.075  | 0.799     | 1.094     | 1.25    | -1.47  | 0.55      |
| HPY1599 | 15877 | JHF | 1 | -0.8005 | -0.988667 | -1.03     | -1.505  | 0.95   | -1.129    |
| HPY1010 | 15288 | HP1 | 1 | 0.005   | -0.234333 | 0.123333  | 0.07    | 0.37   | 0.41      |
| HPY1011 | 15289 | HP1 | 1 | -0.06   | -0.083333 | 0.11      | 0.11    | 0.115  | 0.040667  |
| HPY1012 | 15290 | HP1 | 1 | 0.227   | 0.2       | 0.073333  | 0.295   | 0.365  | 0.43      |
| HPY1013 | 15291 | HP1 | 1 | 0.292   | 0.346667  | 0.147333  | 0.465   | 0.215  | 0.318333  |
| HPY1014 | 15292 | HP1 | 1 | 0.1035  | 0.306667  | 0.175333  | 0.215   | 0.41   | 0.284667  |
| HPY1015 | 15293 | HP1 | 1 | 0.45    | 0.25      | 0.113333  | 0.108   | -0.37  | 0.464333  |
| HPY1016 | 15294 | HP1 | 1 | 0.53    | -0.09     | 0.14      | -0.227  | 0.15   | 0.216667  |
| HPY1017 | 15295 | HP1 | 1 | 0.185   | 0.276667  | -0.066667 | 0.31    | 0.185  | 0.47      |
| HPY1019 | 15297 | HP1 | 1 | -0.105  | 0.14      | 0.07      | 0.233   | 0.075  | 0.370667  |
| HPY1020 | 15298 | HP1 | 1 | 0.145   | -0.033333 | 0.15      | 0.11    | 0.16   | 0.421333  |
| HPY1021 | 15299 | HP1 | 1 | 0.24    | 0.413333  | 0.266667  | 0.365   | 0.065  | 0.6       |
| HPY1022 | 15300 | HP1 | 1 | 0.1     | 0.006667  | 0.223333  | 0.155   | 0.255  | 0.25      |
| HPY1023 | 15301 | HP1 | 1 | -0.07   | 0.286667  | -0.156667 | 0.37    | -0.51  | 0.65      |
| HPY1024 | 15302 | HP1 | 1 | 0.165   | 0.033333  | 0.12      | 0.1305  | 0.32   | 0.274     |
| HPY1025 | 15303 | HP1 | 1 | 0.085   | 0.43      | 0.106667  | 0.325   | 0.64   | 0.17      |
| HPY1707 | 15985 | HP1 | 1 | -0.367  | -0.4      | -0.336667 | 0.035   | -0.32  | 0.3775    |
| HPY1027 | 15305 | HP1 | 1 | 0.0585  | -0.456    | 0.036667  | -0.05   | 0.14   | 0.01      |
| HPY1028 | 15306 | HP1 | 1 | 0.157   | -0.427333 | 0.173333  | 0.42    | 0.095  | 0.198     |
| HPY1029 | 15307 | HP1 | 1 | 0.185   | -0.816667 | -0.379333 | -0.271  | -0.6   | -0.163333 |
| HPY1030 | 15308 | HP1 | 1 | -0.065  | -0.433333 | 0.083333  | 0.37    | 0.19   | 0.244     |
| HPY1031 | 15309 | HP1 | 1 | 0.1465  | -0.08     | 0.033333  | 0.23    | 0.37   | 0.196667  |
| HPY1032 | 15310 | HP1 | 1 | 0.338   | -0.443333 | -0.023333 | 0.2265  | -0.06  | 0.111     |
| HPY1033 | 15311 | HP1 | 1 | 0.09    | -0.416667 | -0.05     | -0.0465 | 0.16   | 0.173333  |
| HPY1034 | 15312 | HP1 | 1 | -0.125  | -0.33     | 0.15      | 0.11    | 0.19   | 0.435667  |
| HPY1035 | 15313 | HP1 | 1 | 0.035   | -0.143333 | 0.12      | 0.185   | 0.19   | 0.323333  |
| HPY1036 | 15314 | HP1 | 1 | 0.309   | -0.38     | -0.203333 | -0.169  | -0.135 | 0.168     |
| HPY1037 | 15315 | HP1 | 1 | 0.245   | 0.106667  | 0.123333  | 0.095   | 0.33   | 0.283333  |
| HPY1038 | 15316 | HP1 | 1 | -0.06   | -0.04     | -0.053333 | 0.0405  | 0.47   | -0.114    |
| HPY1039 | 15317 | HP1 | 1 | -0.04   | -0.376667 | -0.126667 | -0.365  | -0.08  | 0.073333  |
| HPY1040 | 15318 | HP1 | 1 | -0.387  | -0.311    | -0.27     | -0.17   | -0.385 | -0.11     |
| HPY1041 | 15319 | HP1 | 1 | 0.32    | -0.1      | 0.066667  | 0.175   | 0.18   | 0.26      |
| HPY1042 | 15320 | HP1 | 1 | 0.055   | 0.016667  | 0.11      | 0.12    | 0.115  | 0.293333  |
| HPY1043 | 15321 | HP1 | 1 | -0.005  | -0.003333 | 0.253333  | 0.315   | 0.055  | 0.294667  |
| HPY1044 | 15322 | HP1 | 1 | -0.122  | -0.11     | 0.111     | 0.16    | 0.065  | 0.042667  |
| HPY1803 | 16081 | HP1 | 1 | -3.545  | 0.981333  | 0.609     | 1.08    | -2.875 | -2.399    |
| HPY1046 | 15324 | HP1 | 1 | -0.37   | -0.193333 | -0.25     | -0.489  | 0.05   | -0.246667 |
| HPY1047 | 15325 | HP1 | 1 | 0       | -0.513333 | -0.233333 | -0.326  | 0.13   | 0.22      |
| HPY1048 | 15326 | HP1 | 1 | -0.07   | 0.0445    | -0.113333 | -0.16   | -0.06  | -0.131    |
| HPY1049 | 15327 | HP1 | 1 | -0.2    | -0.173333 | -0.038333 | 0.1     | -0.005 | -0.1115   |
| HPY1781 | 16059 | HP1 | 1 | 0.0645  | 0.152333  | 0.046667  | 0.295   | 0.13   | 0.501     |
| HPY1051 | 15329 | HP1 | 1 | -0.0385 | -0.033667 | 0.24      | 0.517   | 0.07   | 0.335     |
| HPY1052 | 15330 | HP1 | 1 | 0.105   | -0.09     | 0.2       | 0.23    | 0.165  | 0.158     |
| HPY1782 | 16060 | HP1 | 1 | -0.11   | -0.133333 | 0.053333  | -0.563  | -0.475 | -0.263333 |
| HPY1054 | 15332 | HP1 | 1 | 0.145   | -0.11     | 0.183333  | 0.33    | -0.26  | 0.101333  |
| HPY1055 | 15333 | HP1 | 1 | -0.145  | -0.126667 | -0.086667 | 0.1635  | -0.295 | -0.062667 |
| HPY1056 | 15334 | HP1 | 1 | -0.08   | -0.153333 | 0.026667  | 0.675   | 0      | 0.416667  |
| HPY1694 | 15972 | HP1 | 1 | 0.235   | 0.11      | 0.113333  | 0.185   | -0.08  | 0.371667  |

|         |       |     |   |         |           |           |         |        |           |
|---------|-------|-----|---|---------|-----------|-----------|---------|--------|-----------|
| HPY1058 | 15336 | HP1 | 1 | -0.028  | -0.105333 | -0.156667 | -0.08   | -0.385 | -0.1115   |
| HPY1059 | 15337 | HP1 | 1 | 0.64    | 0.58      | 0.38      | 0.645   | 0.21   | 0.233333  |
| HPY1060 | 15338 | HP1 | 1 | 0.405   | 0.293333  | 0.506667  | 0.435   | 0.45   | 0.329333  |
| HPY1061 | 15339 | HP1 | 1 | 0.579   | 0.216667  | 0.21      | 0.727   | 0.19   | 0.66      |
| HPY1062 | 15340 | HP1 | 1 | -0.28   | -0.153333 | -0.023333 | 0       | 0.175  | 0.25      |
| HPY1063 | 15341 | HP1 | 1 | -0.045  | 9.25E-18  | 0.093333  | 0.28    | 0.355  | 0.135     |
| HPY1064 | 15342 | HP1 | 1 | 0.2725  | 0.27      | 0.053333  | -0.03   | -0.02  | 0.39      |
| HPY1065 | 15343 | HP1 | 1 | -0.2815 | -0.133333 | -0.192    | 0.27    | 0.39   | 0.415     |
| HPY1066 | 15344 | HP1 | 1 | 0.516   | 0.25      | 0.373333  | 0.295   | 0.025  | 0.21      |
| HPY1067 | 15345 | HP1 | 1 | 0.211   | 0.29      | 0.247667  | 0.345   | -0.07  | 0.32      |
| HPY1068 | 15346 | HP1 | 1 | -0.044  | -0.246667 | -0.013333 | 0.03    | -0.075 | 0.040667  |
| HPY1069 | 15347 | HP1 | 1 | 0.189   | -0.006667 | 0.154667  | -0.14   | 0.17   | 0.256667  |
| HPY1070 | 15348 | HP1 | 1 | 0.2585  | -1.65     | -0.549667 | -0.45   | -0.254 | 0.2015    |
| HPY1071 | 15349 | HP1 | 1 | 0.36    | -0.044667 | 0.16      | 0.347   | 0.015  | 0.437667  |
| HPY1072 | 15350 | HP1 | 1 | -0.025  | -0.283333 | -0.166667 | -0.08   | 0.125  | 0.100333  |
| HPY1073 | 15351 | HP1 | 1 | -0.4015 | 0.347667  | 0.113333  | -0.34   | 0.235  | 0.175667  |
| HPY1074 | 15352 | HP1 | 1 | -1.825  | -0.946667 | -0.996667 | -1.6595 | 0.21   | 0.43      |
| HPY1075 | 15353 | HP1 | 1 | 0.1     | 0.033333  | 0.2       | -0.04   | 0.17   | 0.263333  |
| HPY1076 | 15354 | HP1 | 1 | 0.287   | -0.28     | 0.053333  | 0.07    | 0.005  | 0.550667  |
| HPY1077 | 15355 | HP1 | 1 | 0.254   | 0.003333  | 0.046667  | -0.22   | 0.095  | 0.52      |
| HPY1078 | 15356 | HP1 | 1 | 0.035   | -0.7      | -0.21     | -3.1    | -1.31  | -1.027    |
| HPY1079 | 15357 | HP1 | 1 | -0.2    | 0.036667  | 0.196667  | -2.9985 | 0.14   | -0.028    |
| HPY1080 | 15358 | HP1 | 1 | 0.1     | -0.07     | 0.286667  | -0.075  | -0.075 | 0.234333  |
| HPY1081 | 15359 | HP1 | 1 | -0.145  | -0.206667 | 0.116667  | 0.23    | 0.155  | 0.073333  |
| HPY1082 | 15360 | HP1 | 1 | 0.165   | 0.023333  | -0.010667 | 0.285   | 0.24   | 0.173333  |
| HPY1083 | 15361 | HP1 | 1 | -0.115  | 0.092333  | 0.31      | 0.49    | 0.48   | 0.410333  |
| HPY1084 | 15362 | HP1 | 1 | 0.4485  | -0.35     | -0.153333 | 0.01    | 0.035  | 0.266667  |
| HPY1085 | 15363 | HP1 | 1 | 0.2375  | 0.033333  | 0.173333  | 0.09    | 0.405  | 0.34      |
| HPY1086 | 15364 | HP1 | 1 | -0.1345 | -0.236667 | 0.039     | -0.025  | 0.24   | -0.053333 |
| HPY1087 | 15365 | HP1 | 1 | -0.04   | 0.2       | 0.106667  | 0.01    | -0.165 | 0.119333  |
| HPY1088 | 15366 | HP1 | 1 | -0.1515 | -0.05     | -0.124667 | 0.22    | -0.13  | 0.075     |
| HPY1089 | 15367 | HP1 | 1 | 0.04    | -0.44     | -0.026667 | -0.14   | 0.15   | 0.163333  |
| HPY1090 | 15368 | HP1 | 1 | 0.18    | -0.023333 | 0.083333  | -0.09   | 0.04   | 0.186667  |
| HPY1091 | 15369 | HP1 | 1 | 0.2525  | 0.163333  | 0.236667  | 0.1975  | 0.04   | 0.260333  |
| HPY1092 | 15370 | HP1 | 1 | 0.135   | 0.16      | 0.173333  | 0.07    | 0.135  | 0.25      |
| HPY1598 | 15876 | JHF | 1 | -0.9225 | -0.675    | -0.955333 | -0.53   | 0.805  | -0.58     |
| HPY1093 | 15371 | HP1 | 1 | -1.01   | 0.430667  | -0.162333 | -0.9505 | -1.02  | 0.29      |
| HPY1094 | 15372 | HP1 | 1 | -3.964  | -0.31     | -0.453333 | -1.8    | -2.625 | -1.45     |
| HPY1095 | 15373 | HP1 | 1 | -1.4    | 0.673333  | 0.87      | -3.545  | -2.675 | -2.114667 |
| HPY1096 | 15374 | HP1 | 1 | -0.02   | 0.236667  | 0.88      | -3.68   | -2.605 | -1.817333 |
| HPY1097 | 15375 | HP1 | 1 | -0.435  | 0.078667  | -0.065333 | 0.59    | -0.285 | 0.73      |
| HPY1098 | 15376 | HP1 | 1 | 0.1565  | -0.289667 | 0.006667  | 0.53    | 0.09   | 0.335667  |
| HPY1099 | 15377 | HP1 | 1 | 0.165   | 0.173333  | 0.053333  | 0.29    | -0.06  | 0.178667  |
| HPY1100 | 15378 | HP1 | 1 | 0.0815  | 0.051     | 0.053333  | 0.15    | -0.125 | 0.283     |
| HPY1101 | 15379 | HP1 | 1 | 0.0025  | 0.206667  | 0.08      | 0.066   | 0.23   | 0.470667  |
| HPY1102 | 15380 | HP1 | 1 | 0       | -0.24     | 0.136667  | 0.07    | 0.105  | -0.055    |
| HPY1103 | 15381 | HP1 | 1 | 0.085   | 0.186667  | 0.15      | -0.005  | 0.29   | 0.27      |
| HPY1104 | 15382 | HP1 | 1 | 0.025   | 0.4       | 0.33      | 0.2765  | 0.305  | 0.485333  |
| HPY1105 | 15383 | HP1 | 1 | -1.091  | -0.525    | -0.260333 | -0.237  | -0.02  | 0.643     |
| HPY1665 | 15943 | JHF | 1 | -1.48   | -0.173333 | 0.026667  | -1.655  | 1.09   | 1.230333  |
| HPY1106 | 15384 | HP1 | 1 | 0.0355  | 0.098     | 0.323333  | 0.51    | 0.245  | 0.582667  |
| HPY1107 | 15385 | HP1 | 1 | 0.05    | 0.123333  | -0.003333 | 0.677   | -0.06  | 0.061667  |
| HPY1108 | 15386 | HP1 | 1 | 0.3125  | 0.263333  | 0.23      | 0.5065  | -0.16  | 0.425667  |
| HPY1109 | 15387 | HP1 | 1 | -0.22   | 0.233333  | -0.096667 | 0.503   | 0.39   | 0.496333  |
| HPY1110 | 15388 | HP1 | 1 | -0.02   | 0.093333  | -0.023333 | 0.285   | 0.005  | 0.1385    |

|         |       |     |   |         |           |           |         |        |           |
|---------|-------|-----|---|---------|-----------|-----------|---------|--------|-----------|
| HPY1111 | 15389 | HP1 | 1 | -0.055  | 0.313333  | 0.253333  | 0.265   | 0.25   | 0.306667  |
| HPY1112 | 15390 | HP1 | 1 | -0.035  | 0.06      | 0.123333  | 0.13    | -0.06  | 0.257     |
| HPY1113 | 15391 | HP1 | 1 | -0.22   | -0.083333 | -0.226667 | 0.0795  | 0.11   | 0.173333  |
| HPY1795 | 16073 | HP1 | 1 | 0.1105  | -0.026667 | -0.093333 | 0.175   | 0.19   | 0.326667  |
| HPY1115 | 15393 | HP1 | 1 | -0.3925 | -0.263333 | -0.232667 | -0.64   | -0.925 | -0.47     |
| HPY1666 | 15944 | JHF | 1 | -2.5675 | -0.344333 | -0.023333 | -1.139  | 1.235  | -0.464    |
| HPY1765 | 16043 | HP1 | 1 | -1.288  | -0.413333 | -0.173333 | -0.675  | -0.985 | 0.130667  |
| HPY1117 | 15395 | HP1 | 1 | 0.066   | 0.103333  | 0.2       | 0.565   | 0.115  | 0.586333  |
| HPY1118 | 15396 | HP1 | 1 | -0.185  | -0.033667 | 0.057     | -0.054  | 0.095  | 0.236667  |
| HPY1119 | 15397 | HP1 | 1 | 0.12    | 0.243333  | 0.316667  | 0.34    | 0.445  | 0.576333  |
| HPY1120 | 15398 | HP1 | 1 | 0.1305  | -0.023333 | 0.113333  | -0.3    | 0.395  | 0.4295    |
| HPY1667 | 15945 | JHF | 1 | -2.8415 | -1.953333 | -1.150333 | -2.695  | 1.345  | -1.516667 |
| HPY1121 | 15399 | HP1 | 1 | -0.53   | 0.03      | -0.003333 | -0.178  | 0.095  | 0.135     |
| HPY1122 | 15400 | HP1 | 1 | 0.041   | 0.53      | 0.109667  | 0.555   | -0.15  | -0.16     |
| HPY1123 | 15401 | HP1 | 1 | -0.075  | 0.27      | 0.096667  | 0.456   | -0.045 | 0.087     |
| HPY1124 | 15402 | HP1 | 1 | -0.09   | -0.01     | 0.086667  | 0.17    | 0.395  | 0.033333  |
| HPY1125 | 15403 | HP1 | 1 | -0.089  | -0.072    | 0.3       | 0.115   | 0.245  | 0.338667  |
| HPY1126 | 15404 | HP1 | 1 | -0.045  | -0.06     | 0.136667  | 0.18    | 0.27   | 0.289     |
| HPY1807 | 16085 | HP1 | 1 | 0.0135  | -0.152    | 0.123333  | -0.3945 | -0.235 | 0.149     |
| HPY1129 | 15407 | HP1 | 1 | -0.395  | 0.063333  | -0.25     | -0.05   | 0.31   | 0.08      |
| HPY1130 | 15408 | HP1 | 1 | -0.25   | -0.113333 | -0.066667 | 0.055   | 0.21   | 0.126667  |
| HPY1131 | 15409 | HP1 | 1 | -0.111  | 0.11      | 0.171     | 0.035   | 0.155  | 0.126667  |
| HPY1725 | 16003 | HP1 | 1 | -0.2275 | -0.050667 | -0.06     | -0.08   | 0.06   | 0.5855    |
| HPY1133 | 15411 | HP1 | 1 | 0.005   | 0.186667  | 0.27      | 0.235   | 0.435  | 0.396667  |
| HPY1134 | 15412 | HP1 | 1 | 0.2635  | 0.453333  | 0.282667  | 0.385   | 0.515  | 0.373333  |
| HPY1135 | 15413 | HP1 | 1 | -0.17   | 0.24      | 0.273333  | 0.1095  | 0.03   | 0.149     |
| HPY1136 | 15414 | HP1 | 1 | 0.195   | 0.034     | 0.283333  | 0.3665  | 0.18   | 0.621667  |
| HPY1137 | 15415 | HP1 | 1 | 0.1805  | -0.023333 | 0.073333  | 0.542   | -0.16  | 0.123     |
| HPY1138 | 15416 | HP1 | 1 | -0.08   | -0.2      | 0.26      | 0.33    | 0.33   | 0.293     |
| HPY1139 | 15417 | HP1 | 1 | 0.074   | -0.023333 | 0.067     | -0.045  | 0.195  | 0.116667  |
| HPY1140 | 15418 | HP1 | 1 | -0.25   | 0.07      | 0.076667  | 0.53    | 0.195  | 0.065667  |
| HPY1141 | 15419 | HP1 | 1 | -0.165  | 0.043333  | 0.103333  | 0.168   | -0.165 | 0.112667  |
| HPY1801 | 16079 | HP1 | 1 | -0.1915 | -1.796667 | -1.483    | 0.165   | 0.19   | -2.056333 |
| HPY1143 | 15421 | HP1 | 1 | 0.147   | -0.006667 | 0.113333  | 0.1935  | 0.03   | 0.292333  |
| HPY1144 | 15422 | HP1 | 1 | -0.2    | -0.24     | -0.446667 | -0.509  | -1.335 | -1.075    |
| HPY1145 | 15423 | HP1 | 1 | -0.178  | -0.154667 | -0.038667 | -0.246  | -0.015 | 0.049     |
| HPY1146 | 15424 | HP1 | 1 | -0.27   | 0.073333  | 0.073333  | 0.045   | 0.15   | -0.486333 |
| HPY1147 | 15425 | HP1 | 1 | -0.305  | 0.17      | 0.123333  | 0.51    | 0.125  | 0.685333  |
| HPY1148 | 15426 | HP1 | 1 | -0.075  | 0.246     | 0.159     | 0.405   | 0.41   | 0.424     |
| HPY1149 | 15427 | HP1 | 1 | -0.303  | -0.004667 | -0.04     | 0.31    | 0.1305 | -0.06     |
| HPY1150 | 15428 | HP1 | 1 | 0.17    | -0.066667 | 0.166667  | 0.2445  | -0.32  | 0.252     |
| HPY1151 | 15429 | HP1 | 1 | -0.48   | -0.065    | 0.03      | -0.6365 | 0.065  | 0.426667  |
| HPY1152 | 15430 | HP1 | 1 | 0.07    | 0.023333  | -0.08     | 0.133   | 0.135  | 0.378667  |
| HPY1153 | 15431 | HP1 | 1 | -0.1755 | -0.025    | -0.345667 | -0.02   | -0.045 | -0.185    |
| HPY1154 | 15432 | HP1 | 1 | -0.105  | 0.003333  | 0.086667  | 0.42    | 0.58   | 0.719667  |
| HPY1155 | 15433 | HP1 | 1 | 0.3225  | 0.096667  | 0.08      | 0.089   | 0.37   | 0.714333  |
| HPY1156 | 15434 | HP1 | 1 | -0.072  | 0.086667  | 0.076667  | 0.104   | 0.16   | 0.525     |
| HPY1157 | 15435 | HP1 | 1 | -0.455  | -0.246667 | -0.3      | -0.14   | 0.055  | 0.149667  |
| HPY1158 | 15436 | HP1 | 1 | -0.2315 | -0.01     | 0.13      | 0.0735  | 0.21   | 0.129333  |
| HPY1159 | 15437 | HP1 | 1 | 0.083   | 0.276667  | 0.18      | 0.335   | 0.26   | 0.461     |
| HPY1160 | 15438 | HP1 | 1 | -0.335  | 0.066667  | 0.183333  | 0.018   | -0.57  | 0.247667  |
| HPY1161 | 15439 | HP1 | 1 | 0.084   | 0.11      | 0.346667  | 0.195   | 0.195  | 0.368     |
| HPY1162 | 15440 | HP1 | 1 | 0.022   | 0.086667  | 0.136667  | 0.245   | 0.135  | 0.262     |
| HPY1163 | 15441 | HP1 | 1 | -0.552  | -0.418333 | -0.073333 | -0.25   | 0.22   | 0.041     |
| HPY1164 | 15442 | HP1 | 1 | 0.14    | 0.213333  | 0.036667  | 0.2045  | 0.345  | 0.215667  |

|         |       |     |   |         |           |           |         |         |           |
|---------|-------|-----|---|---------|-----------|-----------|---------|---------|-----------|
| HPY1165 | 15443 | HP1 | 1 | -0.049  | -0.02     | -0.149    | -0.08   | 0.195   | 0.036667  |
| HPY1166 | 15444 | HP1 | 1 | -0.04   | 0.1       | 0.153333  | -0.01   | 0.405   | 0.396667  |
| HPY1167 | 15445 | HP1 | 1 | 0.2105  | -0.173667 | 0.156667  | -0.105  | 0.24    | 0.731     |
| HPY1168 | 15446 | HP1 | 1 | 0.265   | 0.373333  | 0.113333  | 0.39    | -0.08   | 0.390333  |
| HPY1169 | 15447 | HP1 | 1 | 0.2815  | 0.199667  | 0.026667  | 0.085   | 0.395   | 0.16      |
| HPY1170 | 15448 | HP1 | 1 | 0.2425  | 0.276667  | 0.129667  | 0.05    | 0.255   | 0.17      |
| HPY1171 | 15449 | HP1 | 1 | -0.0905 | 0.39      | 0.176667  | 0.3     | 0.31    | 0.321667  |
| HPY1172 | 15450 | HP1 | 1 | 0.24    | 0.253333  | 0.153333  | 0.3355  | 0.015   | 0.523333  |
| HPY1173 | 15451 | HP1 | 1 | 0.16    | 0.25      | 0.133333  | 0.365   | 0.165   | 0.473333  |
| HPY1174 | 15452 | HP1 | 1 | 0.638   | 0.47      | 0.29      | 0.29    | -0.115  | 0.358333  |
| HPY1175 | 15453 | HP1 | 1 | 0.08    | 0.51      | 0.18      | -0.29   | 0.125   | 0.68      |
| HPY1177 | 15455 | HP1 | 1 | 0.405   | -1.176667 | -1.03     | -2.246  | -0.495  | 0.659667  |
| HPY1178 | 15456 | HP1 | 1 | 0.01    | 0.07      | 0.243333  | 0.097   | 0.185   | 0.37      |
| HPY1179 | 15457 | HP1 | 1 | -0.275  | 0.193333  | -0.003333 | 0.1     | 0.07    | 0.453     |
| HPY1180 | 15458 | HP1 | 1 | 0.51    | 0.576667  | 0.243333  | 0.26    | 0.225   | 0.386667  |
| HPY1181 | 15459 | HP1 | 1 | 0.505   | 0.533333  | 0.336667  | 0.4275  | -0.19   | 0.244667  |
| HPY1182 | 15460 | HP1 | 1 | 0.0365  | 0.09      | 0.09      | 0.015   | 0.22    | 0.55      |
| HPY1183 | 15461 | HP1 | 1 | 0.493   | 0.612     | 0.348667  | 0.495   | 0.31    | 0.396667  |
| HPY1184 | 15462 | HP1 | 1 | 0.5355  | 0.41      | 0.336333  | 0.39    | 0.25    | 0.303333  |
| HPY1185 | 15463 | HP1 | 1 | 0.525   | 0.023333  | 0.106667  | 0.12    | 0.285   | 0.106667  |
| HPY1186 | 15464 | HP1 | 1 | 0.286   | 0.206667  | 0.158     | 0.295   | 0.42    | 0.08      |
| HPY1187 | 15465 | HP1 | 1 | -0.185  | 0.503667  | 0.448667  | -0.265  | -0.28   | -0.086667 |
| HPY1188 | 15466 | HP1 | 1 | -0.583  | 0.09      | 0.136667  | -0.295  | -0.67   | 0.19      |
| HPY1189 | 15467 | HP1 | 1 | -0.6915 | 0.013333  | -0.036667 | -0.0615 | -0.02   | -0.119    |
| HPY1190 | 15468 | HP1 | 1 | -0.0605 | -0.196667 | 0.03      | 0       | 0.06    | 0.205667  |
| HPY1191 | 15469 | HP1 | 1 | -0.11   | -0.29     | 0.013333  | -0.17   | 0.02    | 0.132667  |
| HPY1192 | 15470 | HP1 | 1 | -0.5095 | -0.152667 | -0.144667 | -0.76   | -0.915  | -0.4      |
| HPY1193 | 15471 | HP1 | 1 | -1.811  | 1         | 0.818     | 1.65    | -2.48   | -1.523333 |
| HPY1194 | 15472 | HP1 | 1 | -1.175  |           | 0.058667  | 1.4     | -1.075  |           |
| HPY1195 | 15473 | HP1 | 1 | 0.04    | 0.253333  | 0.283333  | 0.305   | 0.31    | 0.233333  |
| HPY1196 | 15474 | HP1 | 1 | -0.08   | 0.176667  | 0.08      | 0.225   | 0.41    | 0.436667  |
| HPY1197 | 15475 | HP1 | 1 | -0.12   | 0.096667  | -0.028667 | 0.45    | 0.27    | 0.689     |
| HPY1750 | 16028 | HP1 | 1 | -0.6615 | 0.1       | 0.05      | 0.44    | 0.34    | 0.397     |
| HPY1199 | 15477 | HP1 | 1 | 0.37    | 0.17      | 0.133333  | 0.285   | 0.345   | 0.489667  |
| HPY1200 | 15478 | HP1 | 1 | 0.22    | -0.3      | 0.21      | 0.229   | 0.405   | 0.491667  |
| HPY1201 | 15479 | HP1 | 1 | 0.136   | 0.093333  | 0.09      | 0.0615  | 0.175   | 0.680333  |
| HPY1202 | 15480 | HP1 | 1 | 0.305   | 0.18      | 0.096667  | 0.29    | 0.035   | 0.3075    |
| HPY1726 | 16004 | HP1 | 1 | -0.31   | 0.26      | -0.003333 | 0.105   | 0.005   | 0.540667  |
| HPY1204 | 15482 | HP1 | 1 | -0.28   | 0.237     | -0.203333 | 0.65    | -0.045  | 0.16      |
| HPY1205 | 15483 | HP1 | 1 | 0.181   | 0.27      | 0.083333  | 0.7015  | 0.09    | 0.749333  |
| HPY1206 | 15484 | HP1 | 1 | 0.266   | -0.006667 | 0.08      | 0.195   | 0.025   | 0.086667  |
| HPY1207 | 15485 | HP1 | 1 | 0.238   | 0.223333  | 0.28      | 0.5515  | 0.13    | 0.364333  |
| HPY1208 | 15486 | HP1 | 1 | 0.12    | 0.05      | -0.03     | -0.13   | -0.17   | -0.14     |
| HPY1668 | 15946 | JHF | 1 | -3.669  | -0.631667 | -0.673333 | -2.7365 | 1.485   | 0.295667  |
| HPY1209 | 15487 | HP1 | 1 | 0.11    | -1.74     | -1.096667 | 0.858   | -1.82   | -0.774    |
| HPY1210 | 15488 | HP1 | 1 | -0.1735 | -0.26     | -0.123333 | -0.0195 | -0.005  | 0.454     |
| HPY1211 | 15489 | HP1 | 1 | -0.485  | 0.115     | -0.366667 | 0.1     | 0.395   | 0.2       |
| HPY1212 | 15490 | HP1 | 1 | -1.14   | -0.166667 | -0.163333 | -0.13   | 0.155   | 0.37      |
| HPY1213 | 15491 | HP1 | 1 | 0.2     | -0.048333 | 0.054667  | -0.235  | -0.07   | 0.311667  |
| HPY1214 | 15492 | HP1 | 1 | 0.165   | 0.226667  | 0.143333  | 0.32    | 0.104   | 0.496667  |
| HPY1215 | 15493 | HP1 | 1 | 0.19    | 0.38      | -0.006667 | 0.088   | -0.4535 | -0.042    |
| HPY1216 | 15494 | HP1 | 1 | 0.575   | 0.326667  | 0.186667  | 0.3285  | 0.29    | 0.297333  |
| HPY1217 | 15495 | HP1 | 1 | 0.36    | 0.373333  | 0.236667  | -0.245  | -0.235  | 0.119667  |
| HPY1218 | 15496 | HP1 | 1 | 0.15    | 0.096667  | 0.17      | -0.04   | 0.27    | 0.216667  |
| HPY1219 | 15497 | HP1 | 1 | -0.0035 | 0.176667  | 0.103333  | -0.04   | 0.045   | 0.179     |

|         |       |     |   |         |           |           |        |         |           |
|---------|-------|-----|---|---------|-----------|-----------|--------|---------|-----------|
| HPY1220 | 15498 | HP1 | 1 | -0.15   | -0.076667 | 0.01      | 0.083  | -0.105  | 0.243     |
| HPY1221 | 15499 | HP1 | 1 | 0.206   | 0.113333  | 0.104667  | 0.265  | 0.265   | 0.393333  |
| HPY1222 | 15500 | HP1 | 1 | 0.344   | 0.103333  | 0.12      | -0.14  | -0.805  | 0.208667  |
| HPY1223 | 15501 | HP1 | 1 | -0.0885 | 0.096667  | 0.174     | -0.15  | 0.345   | 0.306667  |
| HPY1224 | 15502 | HP1 | 1 | -0.01   | -0.097    | 0.005667  | -0.1   | -0.38   | 0.1       |
| HPY1225 | 15503 | HP1 | 1 | 0.2995  | -0.096667 | -0.073333 | 0.16   | -0.315  | -0.056    |
| HPY1226 | 15504 | HP1 | 1 | -0.0585 | 0.12      | 0.163333  | 0.01   | 0.32    | 0.45      |
| HPY1227 | 15505 | HP1 | 1 | -0.285  | 0.25      | 0.287667  | 0.26   | -0.06   | 0.336667  |
| HPY1228 | 15506 | HP1 | 1 |         | -0.302    | 0.2105    | -0.579 | 0.147   |           |
| HPY1229 | 15507 | HP1 | 1 | 0.0545  | 0.3       | 0.199667  | 0.28   | 0.275   | 0.3       |
| HPY1230 | 15508 | HP1 | 1 | -0.31   | 0.25      | 0.006667  | -0.11  | 0.195   | 0.26      |
| HPY1231 | 15509 | HP1 | 1 | -0.335  | -0.253333 | 0.163333  | 0.06   | 0.24    | 0.300333  |
| HPY1232 | 15510 | HP1 | 1 | 0.02    | -0.09     | 0.036667  | -0.085 | 0.3     | 0.321333  |
| HPY1233 | 15511 | HP1 | 1 | 0.3     | -0.076667 | 0.03      | 0.0005 | -0.235  | 0.241     |
| HPY1234 | 15512 | HP1 | 1 | 0.205   | 0.176667  | 0.08      | 0.46   | 0.195   | 0.34      |
| HPY1235 | 15513 | HP1 | 1 | -0.049  | 0.003333  | -0.11     | 0.1115 | -0.26   | -0.2435   |
| HPY1236 | 15514 | HP1 | 1 | 0.55    | 0.36      | 0.223333  | 0.31   | 0.465   | 0.249     |
| HPY1237 | 15515 | HP1 | 1 | 0.25    | 0.248333  | 0.176667  | 0.215  | 0.065   | 0.221     |
| HPY1238 | 15516 | HP1 | 1 | 0.47    | 0.776667  | 0.403333  | 0.283  | 0.425   | 0.620667  |
| HPY1669 | 15947 | JHF | 1 | -0.565  | -1.043333 | -0.89     | -0.26  | 1.37    | 0.390667  |
| HPY1239 | 15517 | HP1 | 1 | 0.34    | 0.72      | 0.163333  | 0.49   | -0.55   | 0.259     |
| HPY1240 | 15518 | HP1 | 1 | -0.15   | -0.22     | -0.053333 | 0.515  | 0.2     | 0.603333  |
| HPY1770 | 16048 | HP1 | 1 | -0.43   | -0.01     | -0.046667 | -0.345 | 0.09    | 0.45      |
| HPY1242 | 15520 | HP1 | 1 | 0.29    | 0.213333  | 0.21      | 0.121  | 0.37    | 0.220333  |
| HPY1243 | 15521 | HP1 | 1 | -2.52   | -1.38     | -1.223333 | -2.63  | -0.115  | 0.033333  |
| HPY1244 | 15522 | HP1 | 1 | 0.06    | -0.247333 | -0.176667 | 0.49   | 0.085   | 0.155667  |
| HPY1245 | 15523 | HP1 | 1 | 0.25    | 0.423333  | 0.296667  | 0.458  | 0.2     | 0.403333  |
| HPY1246 | 15524 | HP1 | 1 | 0.3265  | 0.453333  | 0.34      | 0.06   | 0.24    | 0.22      |
| HPY1713 | 15991 | HP1 | 1 | -0.1585 | -0.006333 | 0         | -0.058 | -0.1555 | 0.4345    |
| HPY1720 | 15998 | HP1 | 1 | -0.26   | 0.336667  | 0.056667  | 0.2485 | 0.062   | 0.195     |
| HPY1249 | 15527 | HP1 | 1 | 0.055   | 0.056667  | 0.23      | -0.27  | 0.195   | 0.35      |
| HPY1250 | 15528 | HP1 | 1 | 0.295   | 0.563333  | 0.303333  | -0.225 | -0.525  | 0.478     |
| HPY1251 | 15529 | HP1 | 1 | -0.12   | 0.09      | 0.066667  | 0.065  | 0.425   | 0.377667  |
| HPY1709 | 15987 | HP1 | 1 | -0.14   | -0.11     | 0.113333  | 0.005  | 0.3225  | 0.36      |
| HPY1253 | 15531 | HP1 | 1 | 0.215   | 0.343333  | 0.403333  | 0.4    | 0.195   | 0.236667  |
| HPY1254 | 15532 | HP1 | 1 | 0.125   | -0.113333 | 0.286667  | 0.245  | 0.405   | 0.161     |
| HPY1255 | 15533 | HP1 | 1 | 0.22    | -0.023333 | -0.09     | 0.03   | -0.075  | 0.4       |
| HPY1256 | 15534 | HP1 | 1 | 0.501   | 0.386667  | 0.163333  | 0.17   | 0.19    | 0.591333  |
| HPY1257 | 15535 | HP1 | 1 | 0.104   | -0.056667 | 0.126667  | -0.32  | 0.27    | 0.066667  |
| HPY1258 | 15536 | HP1 | 1 | 0.11    | 0.35      | 0.323333  | 0.0825 | 0.39    | 0.395333  |
| HPY1259 | 15537 | HP1 | 1 | 0.0455  | 0.086667  | -0.13     | 0.375  | 0.275   | 0.723667  |
| HPY1260 | 15538 | HP1 | 1 | 0.285   | -0.048    | 0.23      | 0.136  | -0.055  | -0.620667 |
| HPY1261 | 15539 | HP1 | 1 | -0.21   | 0.243333  | 0.14      | 0.055  | 0.275   | 0.615     |
| HPY1262 | 15540 | HP1 | 1 | 0.0165  | 0.486667  | 0.213333  | 0.5765 | -0.055  | 0.281     |
| HPY1263 | 15541 | HP1 | 1 | 0.1525  | 0.3       | 0.23      | 0.245  | 0.515   | 0.55      |
| HPY1264 | 15542 | HP1 | 1 | -0.045  | 0.058333  | 0.263333  | 0.32   | 0.5245  | 0.635333  |
| HPY1712 | 15990 | HP1 | 1 | 0.005   | -0.183333 | 0.02      | 0.09   | 0.14    | -0.312    |
| HPY1266 | 15544 | HP1 | 1 | 0.245   | 0.476667  | 0.286     | 0.185  | 0.085   | 0.26      |
| HPY1267 | 15545 | HP1 | 1 | 0.325   | 0.736667  | 0.45      | 0.42   | 0.425   | 0.61      |
| HPY1268 | 15546 | HP1 | 1 | 0.155   | 0.22      | 0.25      | 0.2605 | 0.255   | 0.581     |
| HPY1269 | 15547 | HP1 | 1 | 0.3355  | 0.343333  | 0.143333  | 0.2115 | 0.185   | 0.435     |
| HPY1270 | 15548 | HP1 | 1 | 0.45    | 0.64      | 0.25      | 0.23   | 0.14    | 0.443333  |
| HPY1721 | 15999 | HP1 | 1 | -0.026  | 0.606667  | -0.230333 | 0.625  | 0.025   | 0.244     |
| HPY1272 | 15550 | HP1 | 1 | 0.48    | 0.593333  | 0.45      | 0.24   | 0.045   | 0.243333  |
| HPY1273 | 15551 | HP1 | 1 | 0.03    | 0.526667  | 0.226667  | 0.19   | 0.4     | 0.236667  |



|         |       |     |   |         |           |           |         |        |           |
|---------|-------|-----|---|---------|-----------|-----------|---------|--------|-----------|
| HPY1274 | 15552 | HP1 | 1 | 0.24    | 0.12      | 0.086667  | 0.135   | 0.035  | 0.186667  |
| HPY1275 | 15553 | HP1 | 1 | 0.18    | 0.433333  | 0.223333  | 0.15    | 0.365  | 0.436667  |
| HPY1276 | 15554 | HP1 | 1 | -0.675  | -0.788    | -0.306667 | -0.45   | -1.39  | -0.593333 |
| HPY1277 | 15555 | HP1 | 1 | -0.0405 | 0.063333  | 0.002667  | -0.355  | 0.2    | 0.213333  |
| HPY1278 | 15556 | HP1 | 1 | 0.01    | 0.07      | 0.08      | 0.255   | 0.26   | 0.226667  |
| HPY1279 | 15557 | HP1 | 1 | -0.1    | 0.12      | 0.13      | 0.155   | 0.14   | 0.22      |
| HPY1280 | 15558 | HP1 | 1 | -0.3375 | 0.25      | 0.108333  | 0.04    | 0.115  | -0.019667 |
| HPY1281 | 15559 | HP1 | 1 | -0.0625 | 0.11      | -0.023333 | 0.34    | 0.265  | 0.246667  |
| HPY1282 | 15560 | HP1 | 1 | 0.156   | 0.071     | -0.7705   | 0.4     |        | -0.054    |
| HPY1283 | 15561 | HP1 | 1 | -2.013  | -1.979333 | -1.333333 | 1.26    | -2.465 | -1.447333 |
| HPY1284 | 15562 | HP1 | 1 | -0.0355 | -0.1      | 0.11      | 0.25    | -0.045 | 0.04      |
| HPY1733 | 16011 | HP1 | 1 | -0.2235 | -0.086667 | 0.043333  | 0.325   | 0.145  | 0.347     |
| HPY1286 | 15564 | HP1 | 1 | -0.4405 | -0.27     | -0.037    | -0.165  | 0.445  | 0.123333  |
| HPY1287 | 15565 | HP1 | 1 | -0.065  | 0.133333  | 0.256667  | 0.084   | 0.04   | 0.254     |
| HPY1288 | 15566 | HP1 | 1 | -1.73   | -0.696667 | -0.686667 | -1.48   | 0.415  | -0.706667 |
| HPY1289 | 15567 | HP1 | 1 | -0.95   | 0.233333  | 0.096667  | -1.097  | 0.62   | -0.399667 |
| HPY1706 | 15984 | HP1 | 1 | 0.253   | 0.146667  | 0.15      | 0.1765  | -0.01  | 0.474     |
| HPY1693 | 15971 | HP1 | 1 | 0.585   | 0.083333  | 0.14      | -0.1455 | -0.01  | 0.276     |
| HPY1292 | 15570 | HP1 | 1 | -0.065  | 0.47      | 0.083333  | 0.73    | 0.32   | 0.25      |
| HPY1293 | 15571 | HP1 | 1 | 0.335   | 0.336667  | 0.22      | 0.3295  | 0.505  | 0.603333  |
| HPY1294 | 15572 | HP1 | 1 | -0.075  | 0.516667  | 0.193333  | 0.28    | 0.655  | 0.57      |
| HPY1295 | 15573 | HP1 | 1 | -0.6055 | -0.08     | -0.343333 | 0.36    | 0.26   | 0.54      |
| HPY1296 | 15574 | HP1 | 1 | -0.0335 | 0.067     | -0.010333 | 0.305   | 0.275  | 0.462333  |
| HPY1297 | 15575 | HP1 | 1 | -0.25   | -0.012    | -0.38     | 0.32    | 0.22   | 0.12      |
| HPY1789 | 16067 | HP1 | 1 | -0.75   | -0.008333 | -0.183333 | 0.27    | 0.31   | 0.002667  |
| HPY1299 | 15577 | HP1 | 1 | 0.32    | 0.213333  | 0.2       | 0.455   | 0.435  | 0.453333  |
| HPY1300 | 15578 | HP1 | 1 | 0.4725  | 0.236667  | 0.204333  | 0       | 0.215  | 0.233333  |
| HPY1301 | 15579 | HP1 | 1 | -0.015  | -0.043333 | 0.31      | -0.1965 | 0.265  | 0.38      |
| HPY1302 | 15580 | HP1 | 1 | -0.205  | 0.22      | -0.096667 | 0.4945  | 0.18   | 0.246667  |
| HPY1303 | 15581 | HP1 | 1 | -0.1275 | -0.216667 | -0.12     | -0.02   | 0.165  | 0.3405    |
| HPY1304 | 15582 | HP1 | 1 | 0.17    | 0.246667  | 0.27      | -0.1    | 0.035  | 0.38      |
| HPY1305 | 15583 | HP1 | 1 | -0.16   | 0.046667  | -0.01     | -0.29   | 0.485  | 0.28      |
| HPY1306 | 15584 | HP1 | 1 | -0.2    | 0.426667  | 0.129667  | 0.37    | 0.53   | 0.734     |
| HPY1728 | 16006 | HP1 | 1 | -0.075  | -0.093333 | 0.036667  | 0.4735  | 0.37   | 0.366     |
| HPY1308 | 15586 | HP1 | 1 | -0.1915 | -0.01     | -0.193333 | -0.13   | 0.025  | 0.530333  |
| HPY1309 | 15587 | HP1 | 1 | -0.12   | 0.206667  | 0.163333  | -0.068  | 0.38   | 0.543     |
| HPY1310 | 15588 | HP1 | 1 | 0.0535  | 0.126667  | -0.106667 | 0.235   | 0.425  | 0.368     |
| HPY1311 | 15589 | HP1 | 1 | -0.13   | -0.463667 | -0.496667 | 0.62    | 0.115  | -0.17     |
| HPY1312 | 15590 | HP1 | 1 | -0.47   | 0.036667  | 0.026667  | 0.5     | 0.22   | 0.120667  |
| HPY1313 | 15591 | HP1 | 1 | 0.16    | 0.47      | 0.16      | 0.405   | 0.26   | 0.343333  |
| HPY1314 | 15592 | HP1 | 1 | 0.025   | 0.513333  | 0.253333  | 0.255   | 0.355  | 0.58      |
| HPY1747 | 16025 | HP1 | 1 | 0.085   | 0.236667  | 0.163333  | -0.22   | 0.23   | 0.547     |
| HPY1316 | 15594 | HP1 | 1 | -0.239  | 0.066667  | 0.166667  | 0.07    | 0.3    | 0.364667  |
| HPY1317 | 15595 | HP1 | 1 | -0.3165 | -0.09     | -0.346667 | -0.81   | 0.2395 | 0.07      |
| HPY1318 | 15596 | HP1 | 1 | -0.344  | -0.106667 | -0.04     | 0.27    | 0.325  | 0.552667  |
| HPY1319 | 15597 | HP1 | 1 | 0.12    | 0.14      | 0.233333  | 0.19    | 0.75   | 0.55      |
| HPY1320 | 15598 | HP1 | 1 | 0.38    | 0.326667  | 0.223333  | 0.405   | 0.215  | 0.682     |
| HPY1321 | 15599 | HP1 | 1 | -0.2555 | -0.073333 | 0.070667  | -0.33   | 0.375  | 0.236667  |
| HPY1322 | 15600 | HP1 | 1 | -0.3085 | 0.04      | 0.260333  | 0.12    | 0.06   | 0.506667  |
| HPY1323 | 15601 | HP1 | 1 | -0.08   | 0.543333  | 0.42      | 0.045   | 0.225  | 0.015333  |
| HPY1324 | 15602 | HP1 | 1 | -1.2405 | -0.853333 | -0.817    | 0.49    | 0.085  | 0.67      |
| HPY1325 | 15603 | HP1 | 1 | 0.01    | 0.233333  | 0.216667  | 0.0555  | 0.195  | 0.395667  |
| HPY1326 | 15604 | HP1 | 1 | -0.0415 | 0.336667  | 0.206667  | 0.305   | 0.185  | 0.303333  |
| HPY1327 | 15605 | HP1 | 1 | 0.08    | 0.246667  | 0.393     | 0.24    | 0.16   | 0.36      |
| HPY1328 | 15606 | HP1 | 1 | -0.065  | -0.245    | 0.116667  | 0.005   | 0.07   | 0.342     |

|         |       |     |   |         |           |           |         |         |           |
|---------|-------|-----|---|---------|-----------|-----------|---------|---------|-----------|
| HPY1329 | 15607 | HP1 | 1 | -0.01   | 0.31      | -0.1      | 0.19    | -0.08   | 0.326667  |
| HPY1330 | 15608 | HP1 | 1 | 0.565   | 0.266667  | 0.28      | 0.0835  | 0.165   | 0.425333  |
| HPY1331 | 15609 | HP1 | 1 | 0.265   | -0.06     | -0.22     | -0.065  | -0.2    | 0.12      |
| HPY1332 | 15610 | HP1 | 1 | 0.225   | -0.023333 | 0.163333  | 0.025   | 0.085   | 0.303667  |
| HPY1333 | 15611 | HP1 | 1 | 0.195   | 0.053333  | 0.203333  | 0.06    | -0.175  | 0.093333  |
| HPY1334 | 15612 | HP1 | 1 | -3.074  | -1.306667 | -1.042667 | 1.21    | -2.105  | -1.31     |
| HPY1335 | 15613 | HP1 | 1 | -0.025  | 0.012667  | 0.143333  | 0.1795  | 0.225   | 0.161     |
| HPY1336 | 15614 | HP1 | 1 | -0.4425 | -0.59     | -0.266667 | -0.38   | -0.0745 | -0.26     |
| HPY1337 | 15615 | HP1 | 1 | -0.15   | -0.26     | -0.086667 | -0.057  | -0.165  | 0.198     |
| HPY1338 | 15616 | HP1 | 1 | 0.08    | -0.077667 | -0.146667 | -0.06   | 0.005   | 0.11      |
| HPY1339 | 15617 | HP1 | 1 | 0.3375  | 0.103333  | 0.196667  | 0.35    | 0.29    | 0.119333  |
| HPY1340 | 15618 | HP1 | 1 | 0.22    | 0.03      | -0.053333 | 0.14    | 0.105   | 0.333667  |
| HPY1341 | 15619 | HP1 | 1 | 0.036   | 0.143333  | 0.192333  | -0.215  | 0.03    | 0.216667  |
| HPY1342 | 15620 | HP1 | 1 | -1.205  | -0.223    | -0.283333 | 0.2185  | -0.775  | 0.202333  |
| HPY1343 | 15621 | HP1 | 1 | -0.09   | -0.06     | 0.063333  | -0.4195 | 0.035   | 0.132667  |
| HPY1344 | 15622 | HP1 | 1 | -0.345  | 0.076667  | 0.083333  | 0.215   | 0.245   | 0.23      |
| HPY1345 | 15623 | HP1 | 1 | -0.095  | -0.213333 | 0.026667  | 0.075   | 0.15    | 0.307     |
| HPY1346 | 15624 | HP1 | 1 | 0.16    | 0.246667  | 0.193333  | -0.02   | 0.19    | 0.43      |
| HPY1347 | 15625 | HP1 | 1 | -0.185  | 0.296667  | 0.19      | 0.01    | 0.2     | 0.309333  |
| HPY1348 | 15626 | HP1 | 1 | 0.12    | 0.343333  | 0.156667  | 0.48    | -0.045  | 0.37      |
| HPY1349 | 15627 | HP1 | 1 | 0.335   | 0.463333  | 0.27      | 0.335   | 0.345   | 0.366333  |
| HPY1350 | 15628 | HP1 | 1 | -0.075  | 0.096667  | 0.26      | 0.408   | 0.135   | 0.202333  |
| HPY1351 | 15629 | HP1 | 1 | -2.9015 | -0.726667 | -0.543333 | -2.94   | 0.085   | -0.493    |
| HPY1352 | 15630 | HP1 | 1 | -2.6455 | -0.806667 | -0.436667 | -3.9505 | 0.225   | -0.656667 |
| HPY1692 | 15970 | HP1 | 1 | -0.245  | -0.19     | -0.126667 | -0.49   | -0.055  | -0.176333 |
| HPY1354 | 15632 | HP1 | 1 | 0.085   | 0.016667  | 0.023333  | -0.05   | -0.405  | 0.17      |
| HPY1355 | 15633 | HP1 | 1 | 0.1195  | 0.003333  | 0.006667  | -0.694  | -0.235  | 0.358     |
| HPY1356 | 15634 | HP1 | 1 | 0.06    | 0.136667  | 0.16      | 0.1     | 0.275   | 0.169333  |
| HPY1357 | 15635 | HP1 | 1 | 0.195   | 0.033333  | 0.033333  | -0.25   | 0.175   | 0.415     |
| HPY1358 | 15636 | HP1 | 1 | -0.094  | 0.19      | 0.018333  | 0.125   | 0.205   | 0.436667  |
| HPY1359 | 15637 | HP1 | 1 | -0.155  | 0.103333  | -0.013333 | -0.38   | 0.06    | 0.143333  |
| HPY1780 | 16058 | HP1 | 1 | -0.145  | -0.07     | -0.02     | 0.12    | -0.308  | -0.146    |
| HPY1361 | 15639 | HP1 | 1 | 0.34    | 0.563333  | 0.333333  | 0.205   | -0.085  | 0.15      |
| HPY1362 | 15640 | HP1 | 1 | 0.28    | 0.706667  | 0.503333  | 0.67    | 0.235   | 0.593333  |
| HPY1363 | 15641 | HP1 | 1 | -0.405  | 0.193333  | 0.266667  | 0       | 0.02    | 0.158333  |
| HPY1696 | 15974 | HP1 | 1 | -0.12   | -0.043333 | 0.09      | -0.0485 | -0.03   | -0.002333 |
| HPY1365 | 15643 | HP1 | 1 | -0.275  | -0.17     | 0.046667  | -0.285  | 0.245   | -0.098    |
| HPY1366 | 15644 | HP1 | 1 | -2.2665 | 0.093333  | 0.313333  | -2.83   | -0.31   | -0.116667 |
| HPY1367 | 15645 | HP1 | 1 | -2.62   | 0.906667  | 0.836667  | -2.2015 | -2.33   | -1.178333 |
| HPY1368 | 15646 | HP1 | 1 | -2.245  | 0.743667  | 1.073333  | -2.053  | -2.46   | 0.919333  |
| HPY1369 | 15647 | HP1 | 1 | -0.105  | 0.33      | 0.29      | -0.24   | -0.87   | 0.186667  |
| HPY1370 | 15648 | HP1 | 1 | -0.63   | -0.53     | -0.246667 | -0.47   | -0.57   | -0.356667 |
| HPY1764 | 16042 | HP1 | 1 | 0.0005  | 0.17      | 0.276667  | 0.145   | -0.11   | 0.162333  |
| HPY1372 | 15650 | HP1 | 1 | 0.145   | 0.45      | 0.273333  | -0.24   | 0.31    | 0.253333  |
| HPY1373 | 15651 | HP1 | 1 | -0.113  | 0.416667  | 0.184667  | 0.275   | 0.425   | 0.186667  |
| HPY1374 | 15652 | HP1 | 1 | 0.125   | 0.4       | 0.35      | 0.104   | 0.1     | 0.303333  |
| HPY1375 | 15653 | HP1 | 1 | -0.36   | 0.326667  | -0.156667 | 0.375   | 0.055   | 0.01      |
| HPY1376 | 15654 | HP1 | 1 | 0.135   | 0.043333  | 0.246667  | -0.34   | 0.245   | 0.166     |
| HPY1377 | 15655 | HP1 | 1 | -0.1765 | 0.176     | 0.023333  | 0.46    | 0.315   | 0.173333  |
| HPY1378 | 15656 | HP1 | 1 | 0.095   | 0.283333  | 0.38      | 0.445   | 0.28    | 0.27      |
| HPY1379 | 15657 | HP1 | 1 | -0.1995 | 0.066667  | 0.08      | 0.101   | 0.08    | 0.204667  |
| HPY1380 | 15658 | HP1 | 1 | -0.21   | 0.14      | -0.056667 | -0.315  | -0.18   | 0.255667  |
| HPY1381 | 15659 | HP1 | 1 | -1.3    | -1.558667 | -0.536667 | -0.535  | -0.795  | -0.426    |
| HPY1382 | 15660 | HP1 | 1 | -0.555  | 0.22      | 0.173333  | 0.2     | 0.045   | 0.165667  |
| HPY1671 | 15949 | JHF | 1 | -0.453  | -0.45     | -0.193333 | -0.81   | 1.265   | 0.605     |

|         |       |     |   |         |           |           |         |         |           |
|---------|-------|-----|---|---------|-----------|-----------|---------|---------|-----------|
| HPY1785 | 16063 | JHF | 1 | -0.35   | -0.346667 | -0.033333 | -0.2    | 1.38    | 0.336667  |
| HPY1383 | 15661 | HP1 | 1 | -0.77   | -0.266667 | -0.146667 | -0.09   | -0.53   | -0.431333 |
| HPY1384 | 15662 | HP1 | 1 | 0.22    | 0.355     | 0.133333  | -0.241  | -0.065  | 0.168667  |
| HPY1385 | 15663 | HP1 | 1 | 0.053   | -0.113333 | 0.079333  | -0.2    | 0.31    | 0.35      |
| HPY1386 | 15664 | HP1 | 1 | 0.165   | 0.253333  | 0.25      | 0.095   | 0.53    | 0.523667  |
| HPY1387 | 15665 | HP1 | 1 | 0.0425  | 0.166667  | 0.1       | -0.0735 | 0.005   | 0.192667  |
| HPY1717 | 15995 | HP1 | 1 | -1.977  | 0.596667  | 0.7       | -1.722  | -1.43   | -1.174333 |
| HPY1389 | 15667 | HP1 | 1 | -0.987  | 0.693     | 0.256667  | -0.13   | -1.9175 | -0.38     |
| HPY1390 | 15668 | HP1 | 1 | -2.735  | -1.233333 | -0.846667 | -1.3    | -2.315  | -1.335    |
| HPY1678 | 15956 | JHF | 1 | -2.345  | -0.873333 | -0.94     | -0.32   | 1.055   | -1.160667 |
| HPY1391 | 15669 | HP1 | 1 | 0.135   | 0.093333  | 0.093333  | 0.235   | -0.09   | 0.387667  |
| HPY1392 | 15670 | HP1 | 1 | 0.45    | -0.18     | 0.202     | -0.01   | 0.045   | 0.313333  |
| HPY1393 | 15671 | HP1 | 1 | 0.0385  | 0.193333  | 0.076667  | 0.125   | -0.025  | 0.248     |
| HPY1394 | 15672 | HP1 | 1 | 0.255   | 0.153333  | 0.156667  | 0.13    | -0.25   | 0.232667  |
| HPY1395 | 15673 | HP1 | 1 | -0.12   | 0.133333  | -0.02     | 0.32    | -0.25   | 0.188667  |
| HPY1396 | 15674 | HP1 | 1 | -1.22   | -0.766667 | -0.846667 | -0.89   | -0.39   | -0.05     |
| HPY1397 | 15675 | HP1 | 1 | -0.5295 | -0.923333 | -0.587    | -0.095  | -1.095  | -0.663333 |
| HPY1398 | 15676 | HP1 | 1 | -0.316  | 0.216667  | -0.013333 | -0.165  | 0.22    | 0.455667  |
| HPY1677 | 15955 | JHF | 1 | -3.1385 | -1.289333 | -1.410333 | -3.185  | 1.42    | 0.833333  |
| HPY1399 | 15677 | HP1 | 1 | 0.08    | 0.17      | 0.33      | 0.373   | 0.29    | 0.269     |
| HPY1400 | 15678 | HP1 | 1 | -0.0455 | 0.383333  | 0.183333  | 0.285   | 0.395   | 0.313333  |
| HPY1401 | 15679 | HP1 | 1 | 0.012   | 0.24      | 0.282333  | 0.22    | 0.28    | 0.036667  |
| HPY1763 | 16041 | HP1 | 1 | -0.3545 | -0.003333 | 0.055667  | 0.31    | 0.075   | 0.3265    |
| HPY1403 | 15681 | HP1 | 1 | -0.1025 | 0.14      | 0.13      | 0.01    | 0.065   | -0.145    |
| HPY1676 | 15954 | JHF | 1 | -1.915  | -0.336667 | 0.056667  | -1.26   | 1.385   | -1.046667 |
| HPY1404 | 15682 | HP1 | 1 | -0.87   | -0.707    | -0.153333 | -0.97   | -0.985  | -0.556667 |
| HPY1405 | 15683 | HP1 | 1 | -0.371  | -0.68     | -0.63     | -0.56   | -0.015  | -0.063    |
| HPY1406 | 15684 | HP1 | 1 | 0.14    | 0.16      | 0.233333  | 0.1195  | 0.315   | 0.532     |
| HPY1407 | 15685 | HP1 | 1 | 0.555   | 0.386667  | 0.19      | 0.36    | 0.045   | 0.41      |
| HPY1408 | 15686 | HP1 | 1 | -1.18   | -0.396667 | -0.263333 | -0.685  | -1.12   | 0.015     |
| HPY1409 | 15687 | HP1 | 1 | -0.64   | -0.543333 | -0.206667 | -0.29   | -0.62   | -2.356667 |
| HPY1410 | 15688 | HP1 | 1 | -0.15   | -0.266667 | 0.015     | -0.43   | -0.415  | -2.62     |
| HPY1411 | 15689 | HP1 | 1 | -0.34   | -0.206667 | 0.083333  | -0.257  | -0.24   | -2.178333 |
| HPY1673 | 15951 | JHF | 1 | -0.911  | -0.55     | -0.349333 | -1.19   | 1.13    | -1.233333 |
| HPY1412 | 15690 | HP1 | 1 | -1.755  | -0.336667 | 0.026667  | -1.1    | -1.6    | -1.35     |
| HPY1413 | 15691 | HP1 | 1 | 0.27    | 0.166667  | -0.24     | -0.2    | -0.31   | 0.415     |
| HPY1414 | 15692 | HP1 | 1 | 0.185   | 0.483333  | 0.343333  | 0.37    | 0.035   | 0.293333  |
| HPY1415 | 15693 | HP1 | 1 | -0.15   | -0.173333 | 0.183333  | -0.265  | -0.02   | 0.26      |
| HPY1416 | 15694 | HP1 | 1 | -0.239  | 0.013333  | -0.057333 | -0.105  | -0.14   | -0.1      |
| HPY1417 | 15695 | HP1 | 1 | -0.34   | -0.25     | 0.013333  | -2.63   | 0.09    | 0.147333  |
| HPY1418 | 15696 | HP1 | 1 | -0.112  | -0.028    | -0.22     | -0.33   | -0.23   | -0.555    |
| HPY1419 | 15697 | HP1 | 1 | -0.28   | 0.46      | 0.06      | 0.32    | 0.445   | -0.036667 |
| HPY1420 | 15698 | HP1 | 1 | 0.17    | 0.146667  | 0.076667  | 0.355   | 0.515   | 0.506     |
| HPY1421 | 15699 | HP1 | 1 | 0.1425  | 0.243333  | 0.132333  | 0.19    | 0.19    | 0.183333  |
| HPY1423 | 15701 | HP1 | 1 | 0.171   | 0.423333  | 0.092333  | -0.43   | -0.835  | -0.104333 |
| HPY1424 | 15702 | HP1 | 1 | -0.11   | 0.016667  | 0.08      | 0.275   | -0.74   | -0.201    |
| HPY1425 | 15703 | HP1 | 1 | -0.175  | 0.493333  | 0.1       | 0.4375  | -1.85   | -0.756    |
| HPY1737 | 16015 | HP1 | 1 | 1.047   | 0.036667  | -0.190667 | 0.39    | -2.185  | -2.409    |
| HPY1427 | 15705 | HP1 | 1 | 0.02    | 0.196667  | 0.093333  | 0.515   | -0.03   | -0.243333 |
| HPY1428 | 15706 | HP1 | 1 | 0.11    | -0.076667 | -0.013667 | 0.1     | 0.26    | 0.4       |
| HPY1429 | 15707 | HP1 | 1 | -0.2    | 0.08      | 0.12      | -0.2    | 0.22    | 0.166667  |
| HPY1430 | 15708 | HP1 | 1 | -0.2    | 0.336667  | 0.006667  | -0.055  | 0.255   | 0.373333  |
| HPY1431 | 15709 | HP1 | 1 | -0.118  | -0.353333 | -0.013333 | -0.12   | -0.01   | 0.426667  |
| HPY1432 | 15710 | HP1 | 1 | -0.105  | 0.753333  | -0.043333 | -0.23   | -0.3    | -0.193    |
| HPY1433 | 15711 | HP1 | 1 | -4.4595 | -2.023333 | -1.966667 | -3.305  | -0.785  | -0.310333 |

|         |       |     |   |         |           |           |         |        |           |
|---------|-------|-----|---|---------|-----------|-----------|---------|--------|-----------|
| HPY1434 | 15712 | HP1 | 1 | 0.104   | -0.086667 | 0.15      | -0.17   | 0.235  | 0.306667  |
| HPY1435 | 15713 | HP1 | 1 | -0.5825 | 0.063333  | -0.013333 | 0.29    | 0.09   | 0.176667  |
| HPY1436 | 15714 | HP1 | 1 | 0.115   | -0.106667 | -0.046667 | 0.3995  | -0.235 | 0.543     |
| HPY1437 | 15715 | HP1 | 1 | -0.83   | -0.96     | -0.56     | -1.39   | -0.41  | 0.079667  |
| HPY1438 | 15716 | HP1 | 1 | -3.8    | -1.28     | -1.14     | 0.285   | -2.045 | 0.302667  |
| HPY1439 | 15717 | HP1 | 1 | -1.3825 | 0.194     | -0.053333 | 0.13    | -0.645 | -0.68     |
| HPY1440 | 15718 | HP1 | 1 | -0.3925 | -0.056667 | 0.05      | 0.28    | -0.055 | 0.204     |
| HPY1441 | 15719 | HP1 | 1 | -0.23   | -0.186667 | 0.046667  | -0.1    | 0.265  | 0.295667  |
| HPY1442 | 15720 | HP1 | 1 | 0.035   | -0.213333 | -0.03     | 0.1425  | 0.39   | 0.1       |
| HPY1443 | 15721 | HP1 | 1 | 0.155   | -0.076667 | -0.006667 | -0.0775 | -0.385 | -0.103333 |
| HPY1444 | 15722 | HP1 | 1 | 0.1735  | -0.049    | -0.06     | -0.0215 | 0.145  | -0.04     |
| HPY1445 | 15723 | HP1 | 1 | -0.002  | 0.436667  | 0.33      | 0.585   | 0.175  | 0.33      |
| HPY1446 | 15724 | HP1 | 1 | -0.265  | 0.153333  | 0.376667  | 0.46    | 0.115  | 0.118667  |
| HPY1447 | 15725 | HP1 | 1 | 0.2105  | -0.073333 | 0.056667  | 0.1     | 0.035  | 0.0905    |
| HPY1448 | 15726 | HP1 | 1 | -0.48   | 0.116333  | 0.066667  | -0.357  | -0.275 | -0.225    |
| HPY1449 | 15727 | HP1 | 1 | -0.29   | 0.313333  | 0.13      | -0.035  | 0.19   | 0.038     |
| HPY1450 | 15728 | HP1 | 1 | 0.06    | -0.006667 | 0.193333  | -0.01   | 0.24   | 0.166667  |
| HPY1451 | 15729 | HP1 | 1 | 0.12    | 0.296667  | 0.173333  | 0.23    | -0.25  | 0.372     |
| HPY1690 | 15968 | HP1 | 1 | 0.155   | 0.24      | 0.226667  | -0.08   | 0.01   | 0.14      |
| HPY1453 | 15731 | HP1 | 1 | -0.595  | 0.53      | 0.13      | 0.2     | -0.075 | 0.296667  |
| HPY1454 | 15732 | HP1 | 1 | 0.315   | 0.173333  | 0.31      | 0.4645  | 0.29   | 0.554333  |
| HPY1455 | 15733 | HP1 | 1 | -0.39   | -0.04     | -0.046667 | 0.111   | 0.245  | 0.388333  |
| HPY1456 | 15734 | HP1 | 1 | -0.335  | -0.026667 | 0.056667  | 0.075   | -0.045 | -0.016667 |
| HPY1457 | 15735 | HP1 | 1 | -0.015  | 0.46      | 0.31      | 0.235   | 0.38   | 0.18      |
| HPY1458 | 15736 | HP1 | 1 | -0.12   | -0.206667 | -0.063333 | -0.3    | 0.19   | -0.107667 |
| HPY1459 | 15737 | HP1 | 1 | 0.194   | 0.126667  | 0.103     | 0.25    | 0.24   | 0.493333  |
| HPY1460 | 15738 | HP1 | 1 | -0.08   | 0.19      | 0.1       | -0.0515 | 0.205  | 0.267     |
| HPY1461 | 15739 | HP1 | 1 | 0.205   | 0.39      | 0.086667  | 0.33    | 0.06   | 0.253333  |
| HPY1462 | 15740 | HP1 | 1 | 0.05    | 0.04      | 0.053333  | 0.09    | 0.015  | 0.193667  |
| HPY1463 | 15741 | HP1 | 1 | 0.26    | 0.27      | 0.076667  | -0.345  | 0.04   | 0.279667  |
| HPY1464 | 15742 | HP1 | 1 | -2.473  | 0.1675    | -0.013333 | -0.6    | 0.0505 | 0.04      |
| HPY1465 | 15743 | HP1 | 1 | 0.0235  | 0.46      | 0.206     | 0.285   | 0.305  | 0.456667  |
| HPY1466 | 15744 | HP1 | 1 | 0.172   | 0.123333  | 0.03      | 0.391   | -0.115 | 0.338     |
| HPY1467 | 15745 | HP1 | 1 | 0.25    | 0.243333  | 0.223333  | 0.405   | -0.075 | -0.026667 |
| HPY1468 | 15746 | HP1 | 1 | 0.33    | 0.78      | 0.01      | -0.085  | -0.08  | 0.266667  |
| HPY1469 | 15747 | HP1 | 1 | -0.245  | 0.473333  | 0.26      | 0.15    | 0.105  | 0.13      |
| HPY1768 | 16046 | HP1 | 1 | 0.105   | -0.016667 | -0.006667 | 0.05    | -0.04  | -0.01     |
| HPY1471 | 15749 | HP1 | 1 | -1.13   | -0.666333 | -0.476667 | 0.01    | -0.18  | 0.036667  |
| HPY1472 | 15750 | HP1 | 1 | -0.18   | -1.66     | -1.523333 | -2.506  | 0.285  | -1.976667 |
| HPY1473 | 15751 | HP1 | 1 | -0.435  | 0.293333  | 0.093333  | -0.37   | 0.45   | 0.123333  |
| HPY1474 | 15752 | HP1 | 1 | 0.038   | -0.103333 | -0.063667 | -0.03   | 0.405  | 0.008     |
| HPY1475 | 15753 | HP1 | 1 | 0.05    | 0.283333  | 0.09      | 0.161   | -0.105 | 0.393667  |
| HPY1476 | 15754 | HP1 | 1 | 0.0965  | -0.231    | 0.033333  | 0.4095  | 0.085  | 1.316     |
| HPY1477 | 15755 | HP1 | 1 | 0.085   | 0.23      | 0.106667  | 0.355   | -0.11  | 0.078     |
| HPY1478 | 15756 | HP1 | 1 | -0.03   | 0.03      | -0.133333 | -0.06   | 0.19   | -0.125    |
| HPY1479 | 15757 | HP1 | 1 | -0.07   | 0.236667  | 0.213333  | 0.11    | 0.135  | 0.275     |
| HPY1480 | 15758 | HP1 | 1 | 0.265   | 0.336667  | 0.223333  | 0.245   | 0.145  | 0.323333  |
| HPY1481 | 15759 | HP1 | 1 | -0.48   | -0.196667 | -0.056667 | -0.217  | 0.055  | 0.034667  |
| HPY1482 | 15760 | HP1 | 1 | -0.38   | 0.040333  | -0.106667 | 0.3205  | 0.375  | 0.62      |
| HPY1483 | 15761 | HP1 | 1 | -0.44   | 0.322     | 0.238333  | -0.01   | 0.3    | 0.180333  |
| HPY1484 | 15762 | HP1 | 1 | 0.27    | 0.093333  | 0.176667  | -0.12   | -0.205 | -0.092333 |
| HPY1485 | 15763 | HP1 | 1 | 0.12    | -0.14     | 0.143333  | 0.132   | 0.37   | 0.54      |
| HPY1689 | 15967 | HP1 | 1 | 0.049   | -0.093333 | 0.036667  | -0.2125 | 0.21   | 0.467667  |
| HPY1487 | 15765 | HP1 | 1 | 0.05    | 0.35      | 0.276667  | -0.07   | -0.07  | 0.2       |
| HPY1488 | 15766 | HP1 | 1 | 0.135   | 0.266667  | 0.086667  | 0.078   | 0.12   | 0.462667  |

|         |       |     |   |         |           |           |         |        |           |
|---------|-------|-----|---|---------|-----------|-----------|---------|--------|-----------|
| HPY1489 | 15767 | HP1 | 1 | 0.018   | 0.253333  | 0.026667  | -0.34   | -0.325 | -0.4      |
| HPY1490 | 15768 | HP1 | 1 | 0.06    | 0.166     | 0.023333  | 0.595   | -0.115 | 0.593333  |
| HPY1491 | 15769 | HP1 | 1 | 0.005   | -0.023333 | -0.11     | 0.265   | -0.125 | 0.023333  |
| HPY1492 | 15770 | HP1 | 1 | -0.384  | -0.323333 | -0.13     | 0.625   | 0.305  | 0.286667  |
| HPY1493 | 15771 | HP1 | 1 | 0.2     | 0.06      | 0.129     | 0.23    | 0.105  | 0.343333  |
| HPY1494 | 15772 | HP1 | 1 | -0.065  | -0.04     | 0.066667  | 0.045   | 0.035  | 0.176667  |
| HPY1495 | 15773 | HP1 | 1 | 0.205   | 0.04      | 0.206667  | 0.125   | 0.015  | 0.076667  |
| HPY1496 | 15774 | HP1 | 1 | 0.35    | 0.01      | 0.23      | -0.12   | 0.22   | 0.323333  |
| HPY1702 | 15980 | HP1 | 1 | -0.35   | -0.131667 | -0.05     | -0.401  | -0.515 | -0.039    |
| HPY1498 | 15776 | HP1 | 1 | 0.385   | 0.123333  | 0.316667  | 0.335   | 0.4    | 0.393667  |
| HPY1499 | 15777 | HP1 | 1 | -2.485  | -1.32     | -0.91     | -2.37   | 0.09   | -1.586667 |
| HPY1500 | 15778 | HP1 | 1 | -0.35   | 0.08      | 0.25      | 0.14    | 0.205  |           |
| HPY1501 | 15779 | HP1 | 1 | 0.22    | 0.226667  | 0.34      | 0.44    | 0.105  | 0.342667  |
| HPY1502 | 15780 | HP1 | 1 | 0.15    | -0.126667 | 0.296667  | -0.005  | 0.32   | 0.267667  |
| HPY1773 | 16051 | HP1 | 1 | -0.081  | -0.09     | -0.08     | 0.15    | 0.07   | 0.346     |
| HPY1504 | 15782 | HP1 | 1 | 0.12    | -0.133333 | 0.07      | 0.0005  | 0.155  | 0.05      |
| HPY1505 | 15783 | HP1 | 1 | 0.1085  | -0.023333 | 0.166667  | 0.33    | -0.06  | 0.4545    |
| HPY1506 | 15784 | HP1 | 1 | -0.235  | 0.276667  | -0.26     | 0.4865  | -0.19  | 0.308667  |
| HPY1507 | 15785 | HP1 | 1 | 0.23    | 0.46      | 0.386667  | 0.535   | 0.175  | 0.62      |
| HPY1509 | 15787 | HP1 | 1 | 0.105   | 0.146667  | 0.06      | 0.46    | 0.09   | 0.386667  |
| HPY1510 | 15788 | HP1 | 1 | 0.262   | 0.306667  | 0.116667  | 0       | -0.695 | -0.073    |
| HPY1511 | 15789 | HP1 | 1 | -2.065  | -0.255667 | -0.27     | 0.23    | -0.685 | -0.2735   |
| HPY1512 | 15790 | HP1 | 1 | -0.48   | 0.313333  | 0.01      | 0.365   | 0.155  | 0.163333  |
| HPY1513 | 15791 | HP1 | 1 | -0.0325 | 0.12      | -0.156667 | -0.302  | -0.21  | 0.2       |
| HPY1715 | 15993 | HP1 | 1 | 0.038   | 0.168667  | -0.013333 | 0.105   | -0.269 | 0.507     |
| HPY1674 | 15952 | JHF | 1 | -0.5605 | -0.946667 | -0.48     | -0.902  | 0.835  | 0.06      |
| HPY1675 | 15953 | JHF | 1 | -1.34   | -0.34     | -0.213333 | -1.0445 | 0.91   | -0.534333 |
| HPY1516 | 15794 | HP1 | 1 | 0.4925  | -0.643333 | -0.613333 | -1.89   | -1.305 | -0.731    |
| HPY1517 | 15795 | HP1 | 1 | -0.575  | -0.256667 | -0.103333 | -0.78   | -0.04  | -0.483    |
| HPY1518 | 15796 | HP1 | 1 | -0.6    | -0.371    | -0.61     | -0.27   | -0.39  | -0.453    |
| HPY1519 | 15797 | HP1 | 1 | 0.905   | -1.27     | -1.133333 | -2.3765 | -2.24  | -1.676667 |
| HPY1520 | 15798 | HP1 | 1 | 0.761   | -1.383333 | -1.156667 | -1.8305 | -1.995 | -1.12     |
| HPY1521 | 15799 | HP1 | 1 | -0.31   | -0.19     | -0.153333 | 0.0605  | 0.185  | 0.188333  |
| HPY1522 | 15800 | HP1 | 1 | -1.785  | -0.863333 | -0.88     | -1.12   | -1.51  | -0.797667 |
| HPY1730 | 16008 | HP1 | 1 | -0.3295 | -0.005    | -0.01     | 0.2695  | 0.135  | 0.169     |
| HPY1524 | 15802 | HP1 | 1 | 1.2905  | -0.163333 | -0.186667 | 0.15    | -0.035 | -0.145    |
| HPY1525 | 15803 | HP1 | 1 | 0.125   | 0.046667  | 0.023333  | 0.2005  | 0.57   | 0.424     |
| HPY1526 | 15804 | HP1 | 1 | 0.065   | 0.48      | 0.293333  | 0.2     | 0.375  | 0.41      |
| HPY1527 | 15805 | HP1 | 1 | -0.009  | 0.267667  | 0.08      | 0.002   | -0.04  | 0.228667  |
| HPY1528 | 15806 | HP1 | 1 | -0.355  | -0.121667 | 0.29      | 0.64    | 0.225  | 0.13      |
| HPY1529 | 15807 | HP1 | 1 | 0.17    | 0.036667  | 0.18      | -0.185  | 0.415  | 0.424667  |
| HPY1732 | 16010 | HP1 | 1 | -0.289  | -0.286667 | -0.257667 | -0.465  | 0.071  | -0.227333 |
| HPY1808 | 16086 | HP1 | 1 | -0.075  | 0.036667  | 0.01      | 0.238   | 0.435  | 0.732333  |
| HPY1532 | 15810 | HP1 | 1 | -0.091  | 0.303333  | 0.313     | 0.25    | 0.22   | 0.316667  |
| HPY1533 | 15811 | HP1 | 1 | -0.3345 | 0.249333  | 0.283333  | 0.0165  | 0.04   | 0.335     |
| HPY1534 | 15812 | HP1 | 1 | -1.369  | 0.566667  | 0.905333  | -3.44   | -2.665 | -2.036667 |
| HPY1535 | 15813 | HP1 | 1 | -0.39   | 0.4       | 0.656667  | -2.471  | -2.475 | -1.652    |
| HPY1536 | 15814 | HP1 | 1 | -0.09   | 0.024667  | -0.073333 | 0.49    | -0.03  | -1.8475   |
| HPY1537 | 15815 | HP1 | 1 | 0.815   | 0.853667  | 0.81      | 0.95    | -2.53  | -1.670667 |
| HPY1679 | 15957 | JHF | 1 | -0.145  | -0.376667 | 0.073333  | -2.09   | 1.435  | -1.403333 |
| HPY1680 | 15958 | JHF | 1 | -0.6625 | -0.144333 | 0.39      | -2.99   | 1.315  | -1.477667 |
| HPY1538 | 15816 | HP1 | 1 | 0.57    | 0.446667  | 0.46      | 0.0735  | -0.05  | 0.263667  |
| HPY1539 | 15817 | HP1 | 1 | -0.005  | 0.566667  | 0.44      | 0.415   | 0.135  | 0.549667  |
| HPY1540 | 15818 | HP1 | 1 | -0.025  | 0.346667  | 0.043333  | -0.175  | 0.415  | 0.1755    |
| HPY1761 | 16039 | HP1 | 1 | 0.145   | 0.343333  | -0.05     | 0.315   | 0.035  | 0.048667  |

|         |       |     |   |         |           |           |         |        |           |
|---------|-------|-----|---|---------|-----------|-----------|---------|--------|-----------|
| HPY1784 | 16062 | HP1 | 1 | -0.395  | -0.707667 | -0.322667 | -1.185  | -0.19  | 0.3515    |
| HPY1543 | 15821 | HP1 | 1 | -0.085  | 0.366667  | 0.14      | 0.285   | 0.105  | 0.04      |
| HPY1544 | 15822 | HP1 | 1 | 0.295   | 0.176667  | 0.23      | 0.335   | 0.035  | 0.08      |
| HPY1545 | 15823 | HP1 | 1 | 0.419   | 0.043333  | 0.24      | -0.2675 | -0.005 | 0.205     |
| HPY1546 | 15824 | HP1 | 1 | 0.395   | 0.656667  | 0.416667  | 0.24    | 0.195  | -0.127    |
| HPY1772 | 16050 | HP1 | 1 | 0.3265  | 0         | 0.17      | 0.169   | 0.005  | 0.577667  |
| HPY1548 | 15826 | HP1 | 1 | 0.36    | 0.516667  | 0.11      | -0.13   | -0.225 | 0         |
| HPY1549 | 15827 | HP1 | 1 | 0.18    | 0.183333  | 0.04      | -0.04   | 0.085  | -0.074    |
| HPY1550 | 15828 | HP1 | 1 | 0.461   | 0.463333  | 0.23      | 0.131   | 0.125  | 0.029333  |
| HPY1551 | 15829 | HP1 | 1 | -0.03   | -0.152667 | -0.041667 | 0.241   | 0.14   | 0.211667  |
| HPY1705 | 15983 | HP1 | 1 | 0.2995  | 0.15      | 0.048667  | 0.055   | 0.005  | 0.256667  |
| HPY1553 | 15831 | HP1 | 1 | -0.075  | -0.06     | 0.211     | 0.13    | 0.07   | 0.225     |
| HPY1554 | 15832 | HP1 | 1 | -0.06   | 0.04      | 0.14      | 0.005   | 0.345  | 0.3       |
| HPY1555 | 15833 | HP1 | 1 | -0.117  | 0.33      | 0.323333  | 0.196   | 0.22   | 0.337     |
| HPY1556 | 15834 | HP1 | 1 | -0.164  | 0.145     | 0.015333  | -0.18   | 0.1825 | 0.17      |
| HPY1557 | 15835 | HP1 | 1 | -0.049  | -0.083333 | -0.09     | -0.23   | -0.15  | -0.2485   |
| HPY1558 | 15836 | HP1 | 1 | 0.16    | -0.146667 | 0.13      | -0.155  | 0.13   | 0.23      |
| HPY1559 | 15837 | HP1 | 1 | -0.22   | 0.103333  | -0.016667 | 0.51    | 0.125  | 0.316667  |
| HPY1560 | 15838 | HP1 | 1 | 0.465   | 0.26      | 0.165333  | 0.412   | -0.115 | 0.324     |
| HPY1561 | 15839 | HP1 | 1 | 0.2     | 0.066667  | 0.253333  | 0.4955  | -0.06  | 0.403     |
| HPY1562 | 15840 | HP1 | 1 | 0.215   | -0.047667 | 0.266667  | 0.01    | -0.2   | 0.181667  |
| HPY1563 | 15841 | HP1 | 1 | -0.0315 | -0.143333 | 0.045     | -0.255  | 0.11   | 0.286667  |
| HPY1564 | 15842 | HP1 | 1 | 0.085   | 0.033333  | 0.12      | -0.155  | 0.14   | 0.323333  |
| HPY1565 | 15843 | HP1 | 1 | 0.1335  | 0.463333  | 0.25      | 0.335   | 0.035  | 0.328     |
| HPY1566 | 15844 | HP1 | 1 | -0.197  | 0.503333  | 0.378667  | 0.01    | -0.19  | 0.114     |
| HPY1567 | 15845 | HP1 | 1 | 0.1215  | 0.166667  | 0.203333  | 0.621   | 0.44   | 0.863333  |
| HPY1568 | 15846 | HP1 | 1 | 0.165   | -0.12     | 0.186667  | 0.575   | 0.46   | 0.585333  |
| HPY1569 | 15847 | HP1 | 1 | 0.35    | -0.123333 | 0.166667  | -0.1405 | 0.4    | 0.358333  |
| HPY1570 | 15848 | HP1 | 1 | 0.2885  | 0.173333  | 0.097667  | 0.215   | 0.125  | 0.38      |
| HPY1571 | 15849 | HP1 | 1 | 0.142   | 0.076667  | -0.016667 | -0.006  | 0.045  | 0.331667  |
| HPY1572 | 15850 | HP1 | 1 | -0.21   | 0.503333  | 0.148667  | 0.003   | -0.15  | -0.024333 |
| HPY1573 | 15851 | HP1 | 1 | -0.1    | 0.17      | 0.216667  | 0.2     | 0.06   | 0.13      |
| HPY1574 | 15852 | HP1 | 1 | -0.58   | -0.206667 | 0.056667  | 0.175   | 0.34   | 0.063333  |
| HPY1575 | 15853 | HP1 | 1 | 0.055   | 0.056667  | -0.016667 | -0.3535 | 0.36   | 0.486     |
| HPY1576 | 15854 | HP1 | 1 | 0.112   | 0.21      | 0.306667  | 0.245   | 0.39   | 0.488333  |
| HPY1577 | 15855 | HP1 | 1 | 0.446   | 0.575333  | 0.206     | 0       | 0.2    | 0.295667  |
| HPY1578 | 15856 | HP1 | 1 | -2.33   | -1.116667 | -0.99     | -1.6705 | -1.69  | -0.522667 |
| HPY1579 | 15857 | HP1 | 1 | 0.1855  | 0.21      | 0.183333  | 0.319   | -0.745 | -0.197    |
| HPY1580 | 15858 | HP1 | 1 | 0.015   | 0.3       | 0.133333  | 0.38    | 0.225  | 0.246667  |
| HPY1581 | 15859 | HP1 | 1 | 0.105   | 0.373333  | 0.266667  | -0.0265 | 0.115  | 0.180667  |
| HPY1582 | 15860 | HP1 | 1 | 0.16    | -0.043333 | 0.213     | 0.235   | 0.005  | -0.056667 |
| HPY1583 | 15861 | HP1 | 1 | 0.265   | 0.356667  | 0.286667  | 0.18    | 0.01   | 0.213333  |
| HPY1584 | 15862 | HP1 | 1 | -0.155  | 0.153333  | 0.333333  | 0.195   | 0.385  | 0.286667  |
| HPY1585 | 15863 | HP1 | 1 | 0.16    | 0.323333  | 0.196667  | 0.11    | 0.26   | 0.39      |
| HPY1586 | 15864 | HP1 | 1 | -0.532  | 0.343333  | -0.163333 | -1.48   | -1.02  | -0.84     |
| HPY1587 | 15865 | HP1 | 1 | -1.55   | -0.446667 | -0.486667 | -0.02   | 0.075  |           |
| HPY1588 | 15866 | HP1 | 1 | -0.055  | -0.18     | -0.23     | 0.146   | 0.09   | 0.06      |
| HPY1681 | 15959 | JHF | 1 | -1.765  | -0.698    | -0.373333 | -1.0105 | 0.865  | 0.435     |
| HPY1589 | 15867 | HP1 | 1 | -0.23   | -1.143333 | -1.221    | -0.41   | -1.745 | -1.200667 |
| HPY1590 | 15868 | HP1 | 1 | -1.19   | -0.075667 | -0.326667 | -0.15   | -0.28  | -0.1      |

| 292       | 26695     | 87A       | G27     | CCUG      | 342     | 326       | G39       | Hp1    |   |
|-----------|-----------|-----------|---------|-----------|---------|-----------|-----------|--------|---|
| 1         | 1         | 1         | 1       | 1         | 1       | 1         | 1         | 1      | 1 |
| -0.126667 | -0.170333 | -0.436667 | 0.07    | -0.14     | 0.005   | -0.17725  | 0.123333  | -0.265 |   |
| -0.136667 | -0.123333 | 0.083333  | -0.055  | -0.08     | -0.045  | -0.0675   | 0.063333  | 0.05   |   |
| -0.566667 | -0.453333 | -0.758333 | -0.084  | 0.005667  | -0.295  | -0.247667 | -0.59     | -0.225 |   |
| 0.1       | -0.183333 | 0.14      | 0.2115  | 0.333333  | 0       | 0.0325    | 0.139     | 0.04   |   |
| 0.146667  | -0.01     | 0.1       | -0.085  | 0.183333  | -0.115  | -0.0325   | 0.123333  | 0.01   |   |
| -0.213333 | 0.213333  | 0.26      | -0.06   | 0.516667  | 0.055   | 0.235     | 0.443333  | 0.24   |   |
| 0.195     | -0.385    | -0.241    |         | 0.625     | -0.1095 | 0.014667  | 0.34      | 0.105  |   |
| 0.016667  | 0.106667  | -0.37     | -0.165  | 0.376667  | 0.06    | -0.2      | 0.102667  | -0.385 |   |
| -0.023333 | -0.376667 | 0.13      | 0.095   | 0.08      | 0.02    | -0.0925   | 0.131667  | 0.035  |   |
| 0.204333  | -0.094667 | 0.148667  | 0.125   | -0.051667 | 0.048   | 0.069     | 0.189333  | 0.159  |   |
| -0.275667 | -0.196    | -0.043333 | -0.224  | -0.183333 | -0.085  | -0.025    | -0.061333 | 0.055  |   |
| -0.202333 | -0.443333 | -0.25     | 0.03    | -0.094667 | -0.16   | -0.33325  | -0.231333 | -0.26  |   |
| -0.17     | -0.123333 | -0.22     | -0.085  | -0.022    | -0.055  | -0.05     | -0.02     | -0.035 |   |
| -0.063333 | 0.086667  | -0.08     | -0.0995 | 0.033333  | -0.085  | -0.12525  | -0.057667 | 0.19   |   |
| -0.403333 | -0.263333 | -0.025333 | 0.09    | -0.629333 | 0.015   | -0.046667 | -0.053333 | -0.005 |   |
| 0.148     | 0.01      | 0.273667  | -0.2295 | 0.036667  | -0.0315 | 0.03925   | 0.099     | 0.042  |   |
| 0.26      | -0.003333 | 0.28      | 0.37    | 0.013333  | 0.185   | 0.1025    | 0.293333  | 0.345  |   |
| 0.11      | 0.203333  | 0.37      | 0.52    | 0.366667  | 0.245   | 0.205     | 0.496667  | 0.4    |   |
| 0.413333  | 0.063333  | 0.186667  | 0.19    | 0.443333  | 0.34    | 0.045     | 0.176667  | 0.095  |   |
| 0.046667  | 0.106667  | -0.166667 | 0.39    | 0.256667  | 0.18    | 0.0425    | 0.283333  | -0.125 |   |
| -0.83     | -0.66     | -0.873    | -0.37   | -0.521    | -0.195  | -0.466667 | -0.426    | -0.975 |   |
| -0.271    | -0.8185   | -1.266333 |         |           | -0.88   | -0.22     | -0.388    | -0.665 |   |
| 0.453333  | 0.436667  | -0.27     | 0.25    | 0.333333  | 0.435   | -0.155    | -0.22     | -0.235 |   |
| 0.296667  | 0.17      | 0.486667  | 0.335   | 0.366667  | 0.26    | 0.23      | 0.436333  | 0.3    |   |
| -0.006667 | -0.233333 | 0.086667  | -0.0145 | -0.216667 | 0.065   | 0.0825    | 0.233333  | 0.075  |   |
| 0.386667  | 0.293333  | 0.013333  | -0.15   | 0.523333  | 0.135   | 0.08      | 0.326667  | 0.26   |   |
| -0.036667 | -0.086667 | -0.093667 | -0.06   | -0.27     | -0.06   | 0.08      | 0.08      | 0.045  |   |
| 0.52      | 0.856667  | -0.733333 | -0.83   | 0.396667  | -0.57   | -0.35     | 0.066667  | -0.815 |   |
| 0.203333  | -0.133333 | -0.003333 | 0.065   | 0.013333  | -0.015  | 0.0425    | -0.096667 | 0.225  |   |
| 0.613333  | 0.556667  | -0.488    | 0.6475  | 0.366667  | 0.445   | 0.06125   | 0.341333  | 0.115  |   |
| 0.328667  | 0.013     | 0.110667  | 0.327   | 0.15      | 0.3715  | 0.184     | 0.388     | 0.2275 |   |
| -0.153333 | -0.166667 | 0.003333  | -0.065  | -0.243333 | -0.15   | -0.25     | 0.046667  | 0.043  |   |
| -0.246667 | -0.48     | 0.346667  | 0.088   | 0.216667  | 0       | 0.0025    | 0.189     | -0.13  |   |
| 0.136667  | 0.214333  | 0.333     | 0.36    | 0.02      | 0.345   | 0.202     | 0.336667  | 0.3335 |   |
| 0.031667  | -0.023333 | 0.011     | 0.4735  | -0.053333 | 0.1415  | 0.19575   | 0.301     | 0.343  |   |
| 0.443333  | 0.086667  | 0.124     | 0.325   | 0.006667  | 0.305   | 0.025     | 0.12      | 0.17   |   |
| -0.02     | -0.276667 | 0.066667  | 0.33    | -0.006667 | -0.01   | -0.049333 | 0.06      | -0.005 |   |
| 0.012     | 0.113333  | 0.194333  | 0.175   | 0.504333  | -0.027  | 0.0575    | 0.108     | 0.15   |   |
| 0.08      | -0.103333 | 0.016667  | 0.17    | 0.35      | 0.22    | 0.30325   | 0.234     | 0.215  |   |
| 0.13      | -0.16     | -0.38     | 0.05    | 0.23      | 0.205   | -0.0975   | -0.153333 | -0.185 |   |
| 0.163333  | -0.213333 | 0.303333  | 0.325   | 0.54      | -0.035  | 0.2125    | 0.29      | -0.205 |   |
| 0.04      | 0.016667  | 0.273333  | 0.1     | 0.34      | 0.315   | 0.3275    | 0.436667  | 0.265  |   |
| -0.033333 | -0.15     | 0.033333  | 0.13    | 0.226667  | 0.12    | 0.0375    | 0.25      | 0.19   |   |
| 0.080667  | -0.008667 | 0.193     | 0.1375  | -0.246667 | 0.0945  | 0.0065    | -0.009    | 0.079  |   |
| -0.062667 | -0.466667 | -0.38     | 0.18    | 0.236667  | -0.045  | -0.0275   | -0.05     | 0.055  |   |
| 0.250333  | 0.026667  | 0.257333  | -0.2975 | 0.240333  | 0.191   | 0.29325   | 0.318667  | 0.2635 |   |
| 0.286667  | 0.106667  | 0.013333  | 0.0535  | -0.083333 | 0.245   | 0.1395    | 0.136667  | 0.3    |   |
| 0.83      | 0.723333  | 0.92      | 0.816   | 1.004333  | 0.77    | 0.75      | 0.799     | 0.515  |   |
| 0.568     | 0.944667  | 0.404333  | 0.647   | 0.273333  | 0.6175  | 0.47325   | 0.32      | -0.994 |   |
| -1.519667 | 0.726667  | 0.045333  | 1.025   | 0.851333  | 0.72    | 0.135     | -0.874    | -1.115 |   |
| -1.706667 | 0.763     | 0.663333  | 0.81    | 1.029333  | 0.59    | 0.0075    | -1.2665   | -0.75  |   |
| -0.043    | -1.400667 | -0.248    | -0.6195 | -0.108333 | -0.502  | -0.135    | -0.398    | -0.455 |   |
| 0.453333  | -3.023333 | -2.196667 | -2.5    | -1.703333 | -1.55   | -1.7325   | -2.14     | -1.265 |   |

|           |           |           |         |           |         |           |           |        |
|-----------|-----------|-----------|---------|-----------|---------|-----------|-----------|--------|
| 0.091333  | -2.753333 | -1.972333 | -2.4575 | -1.6      | -1.335  | -1.343    | -1.87     | -1.04  |
| 0.195333  | 0.168667  | 0.355     | 0.5565  | 0.423333  | 0.3735  | 0.10325   | 0.242333  | 0.121  |
| 0.073     | -0.066667 | -0.124    | 0.0065  | 0.096667  | 0.065   | -0.07375  | -0.140667 | 0.005  |
| -0.553333 | 0.01      | -0.336667 | -0.787  | -0.42     | -0.445  | -0.46     | -0.482667 | -0.35  |
| -0.086667 | -0.006667 | -0.273333 | -0.18   | -0.263333 | -0.77   | -0.01     | -0.446667 | -0.155 |
| 0.233333  | 0.183333  | 0.306667  | 0.39    | 0.586667  | 0.385   | 0.055     | -0.097667 | 0.405  |
| -0.281333 | 0.113333  | 0.017333  | -0.0225 | -0.3      | 0.005   | -0.17     | -0.685    | -0.07  |
| -0.333333 | 0.223333  | -0.122667 | -0.05   | -0.051333 | -0.0245 | -0.02325  | -0.47     | 0.14   |
| -0.45     | -0.243333 | -1.876667 | -2.19   | -1.403333 | -1.46   | -1.05     | -1.05     | -0.725 |
| -0.88     | 0.466667  | -0.333333 | -0.055  | -0.296667 | -0.035  | -0.3725   | -0.543333 | 0.105  |
| -0.566667 | 0.07      | -0.023333 | -0.565  | -0.343333 | -0.335  | -0.3675   | -0.553333 | 0.124  |
| -0.583333 | 0.11      | -0.183333 | -0.355  | 0.077     | -0.19   | -0.237    | -0.390667 | -0.31  |
| -0.05     | 0.44      | 0.012667  | -0.67   | -0.4      | 0.15    | -0.3275   | -0.313333 | -0.022 |
| 0.346667  | 0.103333  | 0.346667  | 0.385   | -0.4      | 0.185   | -0.0375   | -0.106667 | -0.06  |
| 0.14      | -0.096667 | 0.01      | 0.11    | -0.096667 | 0.245   | -0.16     | 0.17      | -0.065 |
| 0.266667  | 0.108     | 0.269333  | 0.4635  | -0.05     | 0.2255  | -0.00675  | 0.218667  | 0.237  |
| 0.103333  | -0.153333 | 0.306667  | 0.305   | -0.133333 | 0.245   | 0.1125    | 0.187333  | 0.13   |
| 0.25      | 0.162     | 0.099     | -0.213  | 0.35      | 0.1765  | -0.01925  | 0.179     | 0.2815 |
| 0.297667  | -0.353333 | 0.452667  | 0.149   | 0.273333  | 0.45    | 0.353     | 0.44      | 0.41   |
| 0.27      | -0.01     | 0.471     | 0.375   | 0.246667  | 0.4     | 0.3125    | 0.436667  | 0.34   |
| -0.233333 | 0.033333  | 0.335333  | -0.0905 | 0.186667  | 0.205   | 0.2525    | 0.322333  | 0.195  |
| 0.17      | -0.03     | 0.265333  | 0.05    | 0.015333  | 0.21    | -0.06325  | 0.179     | 0.015  |
| 0.235     | -0.22     | 0.025     | 0.24    | -0.000667 | -0.2385 | 0.2845    | 0.03      | 0.096  |
| 0.33      | 0.043333  | 0.107     | 0.264   | 0.41      | 0.09    | 0.1475    | 0.4       | 0.24   |
| 0.086667  | 0.006667  | 0.136667  | 0.255   | 0.296667  | 0.17    | 0.08      | -0.053333 | 0.18   |
| -0.486667 | 0.633333  | 0.146667  | -0.49   | -0.543333 | -0.435  | -0.145    | 0.079     | 0.21   |
| 0.249667  | 0.297667  | 0.227667  | 0.3625  | 0.480333  | 0.3735  | 0.16475   | 0.326     | 0.3455 |
| -0.1195   | -0.2705   | -1.68     |         | -0.294    | -0.46   | -0.296333 | -0.66     | -0.37  |
| 0.173333  | 0.023333  | -0.073333 | 0.09    | -0.013333 | 0.365   | 0.13225   | 0.111     | 0.32   |
| -0.183333 | -0.08     | 0.063333  | 0.287   | 0.113333  | 0.02    | -0.2425   | 0.153667  | 0.3    |
| 0.075     | -0.250667 | 0.316667  | 0.2905  | 0.411     | 0.231   | 0.24575   | 0.199333  | 0.3605 |
| 0.026     | -0.126667 | 0.111     | 0.077   | -0.125    | -0.1    | -0.33     | -0.3935   | 0.1    |
| 0.286667  | -0.023333 | 0.216667  | 0.035   | 0.193333  | 0.21    | 0.0125    | 0.236667  | 0.04   |
| 0.103333  | 0.026667  | 0.066667  | 0.025   | -0.146667 | 0.07    | 0.105     | 0.166667  | 0.145  |
| 0.14      | 0.18      | 0.33      | 0.195   | -0.063333 | 0.295   | 0.17      | 0.286667  | 0.225  |
| -0.013333 | -0.55     | -0.143333 | 0.041   | -0.5      | -0.285  | -0.07     | -0.0855   | -0.355 |
| -0.071    | -0.026667 | 0.06      | 0.1845  | -0.26     | -0.05   | -0.1225   | -0.139333 | -0.01  |
| -0.283667 | 0.090667  | -0.931667 | 0.2565  | -1.07     | -1.502  | -1.27275  | -1.724333 | 0.1285 |
| -0.353333 | -0.28     | -0.526667 | 0.016   | -0.036667 | -0.3715 | -0.195    | -0.188333 | -0.855 |
| -0.18     | -0.31     | -0.373333 | -0.0555 | -0.435    | -0.15   | -0.395    | -0.252333 | 0.035  |
| -0.021333 | -0.05     | 0.06      | 0.33    | 0.016333  | -0.07   | 0.02175   | 0.225     | 0.27   |
| -0.105333 | -0.673333 | -0.716667 | 0.038   | 0.266     | -0.08   | 0.037667  | -0.02     | -0.07  |
| 0.326667  | 0.273333  | 0.116667  | 0.425   | 0.05      | 0.23    | 0.005     | 0.15      | 0.235  |
| -0.065    | -0.018333 | -0.154    | 0.131   | -0.279667 | -0.055  | -0.07425  | -0.082667 | -0.09  |
| 0.14      | 0.25      | 0.42      | 0.285   | 0.223333  | 0.245   | 0.11      | 0.206667  | 0.045  |
| -0.103333 | 0.183333  | 0.133333  | 0.035   | 0.16      | 0.03    | -0.045    | 0.12      | 0.16   |
| -0.036667 | 0.19      | 0.14      | 0.21    | 0.066667  | 0.02    | -0.11     | 0.078     | 0.065  |
| -0.196667 | 0.036667  | 0.253333  | 0.115   | -0.156667 | 0.09    | 0.03      | 0.073333  | 0.08   |
| 0.08      | 0.016667  | 0.136667  | 0.099   | 0.166667  | -0.21   | -0.0625   | 0.051     | 0.015  |
| 0.02      | 0.136667  | -0.12     | 0.084   | 0.073333  | 0.065   | -0.19     | -0.023333 | 0.25   |
| -0.096667 | -0.183333 | 0.14      | 0.1     | -0.01     | 0.2     | -0.0775   | 0.113333  | 0.11   |
| 0.423333  | 0.103333  | 0.14      | 0.425   | 0.09      | 0.285   | 0.125     | 0.256667  | 0.295  |
| -0.016667 | -0.093333 | -0.405    | -0.07   | 0.063333  | -0.305  | 0.164     | 0.287333  | 0.245  |
| 0.14      | 0.013333  | 0.376667  | 0.305   | 0.426667  | 0.39    | 0.13      | 0.3       | 0.165  |
| 0.046667  | -0.14     | 0.2       | 0.215   | -0.056667 | 0.145   | 0.015     | 0.123333  | 0.06   |



|           |           |           |         |           |         |           |           |        |
|-----------|-----------|-----------|---------|-----------|---------|-----------|-----------|--------|
| 0.01      | -0.103333 | 0.05      | 0.07    | -0.076667 | 0.125   | -0.01     | -0.073333 | -0.165 |
| 0.333333  | -0.136667 | 0.226667  | 0.4055  | -0.186667 | 0.1975  | 0.275     | 0.249667  | 0.269  |
| 0.006667  | -0.24     | -0.356667 | 0.15    | 0         | -0.025  | -0.38     | 0.495     | -0.025 |
| -0.105    | -0.423333 | -0.084333 | -0.038  | -0.15     | -0.02   | 0.112667  | -0.13     | 0.005  |
| 0.323333  | 0.123333  | 0.346333  | 0.25    | 0.116667  | 0.37    | 0.195     | 0.258     | 0.255  |
| 0.143333  | -0.036667 | 0.2       | 0.335   | -0.04     | 0.1     | -0.01     | 0.1       | 0.055  |
| 0.186667  | 0.113333  | 0.233333  | 0.4455  | -0.103333 | 0.215   | 0.1975    | 0.273333  | 0.14   |
| 0.226667  | 0.576667  | 0.099333  | 0.794   | -0.04     | 0.32    | 0.14      | 0.063333  | -0.025 |
| 0.51      | 0.196     | 0.207667  | 0.88    | 0.206667  | 0.7675  | 0.085333  | 0.7245    | 0.191  |
| -0.956667 | 0.003333  | -0.27     | 0.229   | -0.183    | 0.19    | 0.103333  | -0.515    | -0.55  |
| -0.1      | -0.176667 | 0.24      | 0.41    | -0.0805   | 0.055   | -0.067    | 0.1725    | 0.215  |
| 0.04      | -0.13     | 0.149     | 0       | 0.21      | 0.075   | 0.219     | 0.271667  | 0.145  |
| -0.076667 | 0.023333  | 0.243333  | 0.125   | -0.051667 | 0.23    | 0.0275    | 0.126667  | 0.225  |
| 0.183333  | -0.063333 | 0.383333  | 0.205   | 0.356667  | 0.1745  | 0.17      | 0.343333  | 0.42   |
| 0.126667  | 0.013     | 0.309333  | 0.02    | -0.053333 | 0.27    | 0.19725   | 0.148333  | 0.08   |
| -0.31     | -0.316667 | -0.116667 | -0.105  | -0.296667 | -0.285  | -0.1875   | -0.206667 | -0.01  |
| 0.14      | 0.003333  | 0.073333  | 0.06    | 0.063333  | 0.155   | 0.0825    | 0.176     | 0.305  |
| -0.085    | 0.243333  | -1.032    | -0.43   | 0.61      | 0.01    | -0.853333 | 0.66      | -0.07  |
| -0.03     | 0.16      | -0.14     | -0.025  | -0.143333 | 0.015   | -0.045    | 0.033333  | -0.005 |
| 0.306667  | 0.16      | 0.35      | 0.15    | 0.235667  | 0.145   | 0.0975    | 0.233333  | 0.285  |
| -0.063333 | -0.09     | 0.073333  | 0.07    | 0.01      | 0.14    | -0.01     | 0.15      | 0.2    |
| 0.09      | -0.023333 | 0.258     | 0.16    | 0.346667  | 0.205   | 0.3025    | 0.366667  | 0.13   |
| 0.43      | 0.103333  | 0.393333  | 0.175   | 0.04      | 0.255   | 0.205     | 0.296667  | 0.19   |
| 0.316667  | -0.294667 | -0.073333 | 0.22    | 0.109667  | 0.08    | -0.00025  | -0.007667 | -0.02  |
| 0.386667  | -0.026667 | 0.386667  | 0.465   | 0.47      | 0.275   | 0.3515    | 0.486     | 0.135  |
| 0.266667  | -0.026667 | 0.273333  | 0.26    | 0.173333  | 0.31    | 0.02      | 0.086667  | 0.16   |
| 0.4       | 0.093333  | 0.393333  | 0.415   | 0.72      | 0.335   | 0.32      | 0.430667  | 0.445  |
| 0.296667  | -0.103333 | 0.286667  | 0.37    | -0.003333 | 0.215   | 0.0825    | 0.17      | 0.105  |
| 0.203333  | 0.023333  | 0.27      | 0.125   | 0.123333  | 0.235   | 0.0975    | 0.203333  | 0.435  |
| 0.36      | 0.11      | 0.48      | 0.22    | 0.32      | 0.405   | 0.2175    | 0.336667  | 0.45   |
| 0.34      | 0.18      | 0.09      | 0.095   | -0.01     | 0.095   | 0.0525    | 0.144667  | 0.255  |
| 0.156667  | 0.186667  | 0.4       | 0.285   | 0.293333  | 0.3     | 0.15      | 0.37      | 0.245  |
| -0.205333 | -0.449333 | -0.377333 | 0.2     | 0.25      | -0.205  | 0.00575   | -0.305333 | -0.015 |
| 0.35      | 0.073333  | 0.12      | 0.03    | 0.086667  | 0.115   | 0.0625    | 0.31      | 0.13   |
| -0.123333 | -0.264    | -0.28     | -0.11   | -0.098    | -0.05   | -0.14     | -0.38     | -0.29  |
| 0.096667  | -0.056667 | 0.396667  | 0.235   | 0.11      | 0.295   | 0.2775    | 0.5       | 0.09   |
| 0.403333  | -0.376667 | 0.306667  | 0.295   | 0.523333  | 0.43    | 0.38      | 0.496667  | 0.39   |
| 0.153667  | 0.145667  | 0.016333  | -0.1195 | 0.156     | 0.23    | 0.0545    | 0.047333  | 0.3085 |
| -0.143333 | -0.033333 | 0.103333  | 0.21    | -0.286667 | -0.044  | -0.0375   | -0.123333 | -0.025 |
| 0.043333  | -0.083333 | 0.032667  | 0.155   | 0.07      | 0.125   | 0.025     | 0.183333  | 0.145  |
| 0.06      | 0.12      | 0.146667  | 0.255   | 0.13      | 0.08    | 0.0175    | 0.093333  | 0.185  |
| -0.12     | -0.120667 | 0.154333  | 0.18    | -0.111333 | 0.063   | 0.093333  | 0.245     | 0.0295 |
| -0.06     | 0.036667  | 0.275333  | 0.285   | 0.03      | 0.175   | 0.0425    | 0.316667  | 0.155  |
| -0.166667 | -0.1      | 0.268667  | -0.1065 | -0.225333 | 0.125   | 0.113333  | -0.07     | 0.145  |
| -0.23     | -0.22     | -0.283333 | -0.54   | -0.066667 | -0.09   | -0.32875  | -0.14     | -0.095 |
| 0.05      | -0.154    | 0.286667  | 0.325   | 0.106667  | 0.165   | 0.24      | 0.323333  | 0.04   |
| 0.173333  | -0.05     | 0.126667  | 0.38    | 0.17      | 0.2     | 0.075     | 0.156667  | 0.315  |
| 0.523333  | 0.13      | 0.113333  | 0.36    | 0.273333  | 0.26    | 0.168     | 0.008667  | 0.1675 |
| 0.17      | 0.063333  | -0.084333 | 0.18    | 0.353333  | 0.35    | 0.195     | 0.429333  | 0.425  |
| -0.4775   | 0.782667  | -0.9855   | 0.002   | 1         | -0.3745 | -0.496667 | -1.87     | -0.06  |
| 0.21      | -0.053333 | 0.323333  | 0.31    | 0.403333  | -0.17   | 0.365     | 0.443333  | 0.355  |
| 0.195     | -0.003333 | 0.338333  | 0.2765  | -0.096667 | -0.009  | 0.27725   | 0.428667  | 0.191  |
| 0.19      | -0.296667 | -0.31     | -0.04   | -0.03     | -0.425  | -0.1625   | -0.153333 | -0.145 |
| 0.023333  | -0.243333 | -0.07     | -0.09   | -0.28     | -0.19   | -0.035    | -0.026667 | 0.035  |
| 0.126667  | -0.096667 | 0.123333  | 0.28    | -0.333333 | 0       | -0.09     | -0.116667 | 0.185  |

|           |           |           |         |           |         |           |           |         |
|-----------|-----------|-----------|---------|-----------|---------|-----------|-----------|---------|
| -0.116667 | -0.073333 | -0.54     | -0.02   | -0.183333 | -0.335  | -0.265    | -0.31     | -0.175  |
| -0.225333 | -0.2725   | -1.23     | -0.05   | 0.625     | -0.657  | -0.468    | -0.731    | -0.174  |
| 0.33      | 0.076667  | 0.303333  | 0.185   | 0.063333  | 0.18    | 0.125     | 0.076667  | 0.215   |
| 0.003333  | 0.093333  | 0.226667  | 0.27    | 0.143333  | -0.045  | 0.045     | 0.18      | 0.125   |
| -0.033333 | -0.116667 | 0.076667  | 0.13    | 0.183333  | 0.23    | 0.005     | 0.078333  | 0.205   |
| -0.093333 | 0.086667  | 0         | -0.03   | -0.297    | -0.085  | -0.21825  | -0.03     | 0.03    |
| 0.2       | 0.15      | 0.126667  | 0.144   | -0.246667 | 0.13    | 0.105     | 0.17      | 0.1895  |
| 0.39      | 0.126667  | 0.253333  | 0.45    | -0.196667 | 0.305   | 0.2       | 0.246667  | 0.03    |
| 0.213333  | 0.133333  | 0.096667  | 0.159   | 0.106667  | 0.07    | 0.065     | 0.1       | 0.01    |
| 0.016667  | -0.46     | -0.003333 | -0.14   | 0.01      | -0.08   | -0.0125   | -0.096667 | -0.035  |
| -0.336667 | -0.123333 | 0.183333  | 0       | 0.376667  | 0.2115  | 0.125     | 0.346667  | 0.185   |
| -2.457333 | -4.471    | -3.017667 | -3.337  | 0.28      | -2.296  | -1.61125  | -0.737333 | -1.258  |
| -1.94     | -3.249333 | -2.613333 | -2.97   | -0.51     | -1.93   | -1.4925   | -0.98     | -1.17   |
| -0.003333 | -0.076667 | 0.253333  | 0.12    | -0.07     | -0.08   | 0.015     | 0.21      | -0.05   |
| 0.306667  | 0.11      | 0.286667  | 0.125   | 0.336667  | 0.345   | 0.055     | 0.08      | 0.335   |
| 0.133333  | 0.193333  | -0.196667 | 0.05    | 0.123333  | -0.03   | -0.0125   | -0.563333 | 0.09    |
| 0.04      | -0.106667 | -0.156667 | 0.08    | 0.686667  | -0.085  | -0.15775  | 0.158667  | 0.32    |
| 0.136667  | 0.04      | 0.126667  | 0.065   | 0.206667  | 0.23    | 0.052     | 0.17      | 0.23    |
| 0.18      | -0.11     | 0.223333  | 0.335   | 0.11      | 0.03    | 0.1       | 0.303333  | 0.055   |
| 0.06      | -0.416667 | -0.213333 | 0.091   | 0.06      | -0.165  | -0.025    | -0.286667 | -0.125  |
| -0.006667 | 0.123333  | -0.053333 | 0.11    | -0.03     | 0.09    | 0.07      | -0.095333 | 0.055   |
| -0.1      | 0.1       | -1.050333 | -0.2065 | -0.117333 | -0.04   | -0.314    | 0.078     | -0.0535 |
| 0.293333  | -0.056667 | -1.08     | 0.26    | 0.073333  | 0.31    | -0.2075   | -0.253333 | -0.025  |
| -0.31     | -0.591333 | -1.725    | -1.06   | 0.27      | -0.4815 | -0.633333 | -0.5715   | 0.025   |
| 0.323333  | 0         | -0.073333 | 0.01    | -0.166667 | 0.093   | 0.09      | 0.306667  | 0.305   |
| 0.256667  | 0.123333  | 0.38      | 0.32    | 0.133333  | 0.185   | 0.1375    | 0.294     | 0.235   |
| 0.383333  | 0.193333  | 0.436667  | 0.21    | 0.126667  | 0.23    | 0.2125    | 0.443333  | 0.375   |
| 0.233333  | -0.106667 | 0.183333  | 0.055   | 0.04      | 0.02    | 0.09      | 0.315667  | 0.23    |
| -0.243333 | -0.07     | 0.046667  | -0.07   | -0.1      | -0.08   | 0.0225    | -0.086667 | 0.065   |
| 0.1       | 0.06      | -0.02     | 0.24    | -0.223333 | -0.13   | -0.1125   | -0.063333 | 0.135   |
| -0.01     | -0.073333 | 0.123333  | 0.076   | -0.072333 | -0.045  | -0.037    | 0.138     | 0.125   |
| -0.183333 | -0.076667 | 0.253333  | 0.1     | -0.003333 | 0.05    | 0.04375   | 0.385     | 0.275   |
| -0.073333 | -0.35     | -0.043333 | 0.01    | -0.19     | 0.11    | -0.07     | 0.09      | 0.02    |
| 0.110333  | -0.322    | 0.056667  | 0.076   | 0.193333  | 0.0415  | 0.03075   | 0.078667  | 0.1165  |
| -0.453333 | -0.323333 | -0.143333 | 0.065   | 0.153333  | 0.26    | 0.1725    | 0.12      | -0.14   |
| -0.26     | -0.238667 | -0.534    | -0.164  | -0.87     | -0.07   | -0.59     | 0.365     | 0.41    |
| -0.293333 | -0.23     | 0.006667  | 0.1     | -0.126333 | 0.005   | -0.16975  | 0.02      | -0.1    |
| 0.14      | -0.103333 | 0.32      | 0.175   | 0.273333  | 0.235   | 0.095     | 0.3       | 0.175   |
| -0.323333 | -0.447    | 0.16      | -0.455  | -0.19     | -0.265  | -0.115    | -0.203333 | -0.34   |
| -0.236667 | 0.006667  | -0.116667 | 0.1     | -0.15     | 0.015   | 0.03      | -0.05     | -0.09   |
| 0.022333  | 0.306333  | -0.217667 | -0.2395 | -0.145    | -0.228  | -0.21175  | -0.300333 | -0.347  |
| 0.05      | -0.046667 | -0.08     | -0.17   | -0.296667 | -0.04   | 0.0875    | 0.116667  | -0.72   |
| 0.133333  | 0.043333  | 0.15      | 0.195   | -0.116667 | 0.175   | 0.02      | 0.19      | 0.11    |
| -0.083333 | 0.066667  | -0.28     | -0.34   | -0.34     | -0.245  | -0.195    | -0.143333 | -0.03   |
| -0.135    | -0.453333 | -0.516667 |         | 0.044     | -0.08   | -0.375333 | -0.015    | -0.045  |
| -0.006667 | -0.066667 | 0.153333  | 0.21    | 0.066667  | 0.17    | -0.0125   | 0.04      | 0.18    |
| -0.17     | -0.096667 | 0.063333  | 0.46    | 0.193333  | 0.155   | 0.1335    | 0.135667  | -0.055  |
| 0.016667  | 0.043333  | 0.146667  | 0.185   | -0.306667 | -0.0465 | -0.03     | -0.016667 | 0.02    |
| -0.066667 | -0.043333 | 0.256667  | 0.332   | 0.613333  | 0.1     | 0.25      | 0.22      | 0.27    |
| 0.006667  | 0.203333  | 0.366667  | -0.05   | 0.516667  | 0.35    | 0.21      | 0.356     | 0.38    |
| -0.093333 | 0.02      | 0.156667  | -0.055  | -0.076667 | 0.08    | 0.025     | 0.12      | 0.195   |
| -0.183333 | 0.09      | -0.116667 | -0.42   | -0.33     | -0.395  | -0.1775   | -0.113333 | 0.025   |
| -1.636667 | 0.113333  | -0.666667 | -2.325  | -1.243333 | -1.455  | -1.06     | -0.583667 | 0.08    |
| 0.116667  | 0.033333  | 0.21      | 0.26    | 0.19      | 0.075   | 0.1775    | 0.208333  | 0.07    |
| 0.17      | 0.056667  | 0.096667  | 0.425   | 0.126667  | 0.09    | 0.0625    | 0.229333  | -0.065  |

|           |           |           |         |           |         |           |           |         |
|-----------|-----------|-----------|---------|-----------|---------|-----------|-----------|---------|
| 0.073333  | -0.13     | 0.073333  | -0.005  | -0.136667 | -0.075  | -0.075    | 0.073333  | 0.055   |
| 0.032667  | -0.191667 | 0.149     | 0.033   | 0.170667  | -0.0185 | -0.0465   | -0.009667 | 0.1725  |
| 0.08      | -0.136667 | 0.19      | 0.02    | 0.184     | -1.255  | 0.074     | 0.163333  | -0.005  |
| 0.043333  | -0.116667 | 0.2       | -0.0135 | -0.01     | 0.125   | 0.04825   | 0.196667  | 0.095   |
| -0.103333 | 0.096667  | 0.026667  | 0.085   | 0.04      | 0.23    | 0.1425    | 0.283333  | 0.225   |
| -0.63     | -0.293    | -0.52     |         |           | -0.885  | -0.87     | -0.2805   | -0.596  |
| 0.05      | 0.04      | 0.076667  | 0.2425  | 0.006667  | -0.435  | -0.1665   | 0.059     | 0.195   |
| -0.309333 | 0.352     | 0.033333  | -0.2575 | 0.142667  | -0.145  | -0.174    | -0.189333 | -0.12   |
| 0.129333  | 0.035     | 0.242667  | 0.1415  | 0.268     | 0.1585  | 0.08475   | 0.3       | 0.2475  |
| 0.333333  | 0.22      | 0.156667  | 0.045   | 0.34      | 0.09    | 0.1475    | 0.19      | 0.22    |
| -0.144333 | -0.024667 | -0.047    | -0.1    | -0.433333 | 0.0165  | 0.09525   | 0.095333  | 0.2045  |
| -0.26     | -0.253333 | -0.173333 | 0.23    | -0.32     | -0.26   | -0.35     | 0.086667  | -0.185  |
| 0.25      | 0.133333  | 0.28      | 0.488   | 0.486667  | 0.15    | 0.16      | 0.311     | 0.16    |
| 0.263333  | 0.023333  | 0.096667  | 0.398   | 0.216667  | 0.183   | -0.004    | 0.1       | 0.115   |
| 0.01      | -0.236667 | 0.056667  | 0.1     | 0.073333  | 0.18    | -0.0575   | -0.14     | 0.1     |
| 0.116667  | -0.053333 | 0.343333  | 0.346   | 0.526667  | 0.275   | 0.2625    | 0.385     | 0.325   |
| 0.076667  | -0.186667 | 0.156667  | 0.1     | 0.206667  | 0.015   | 0.13825   | 0.29      | -0.035  |
| 0.081667  | 0.005333  | 0.425333  | 0.3365  | 0.306667  | 0.2455  | 0.153     | 0.422333  | 0.2475  |
| 0.11      | 0.02      | 0.143333  | 0.185   | 0.03      | 0.075   | 0.06      | 0.194     | 0.2     |
| -0.12     | -0.273333 | -0.19     | 0       | -0.179667 | -0.045  | -0.22275  | 0.046667  | -0.04   |
| 0.12      | 0.03      | -0.136667 | 0.245   | -0.363333 | -0.035  | 0.0175    | -0.056667 | 0.07    |
| 0.32      | -0.288    | 0.056667  | 0.195   | 0.113333  | 0.085   | 0.1       | 0.173333  | 0.325   |
| -0.32     | -0.25     | -0.473333 | -0.224  | -0.023667 | -0.148  | -0.2025   | -0.252667 | -0.2    |
| -0.123    | -0.228667 | -0.153667 | -0.1205 | -0.279333 | -0.197  | -0.046    | -0.034333 | -0.007  |
| 0.013333  | -0.166667 | 0.203333  | 0.38    | 0.113333  | 0.115   | 0.015     | 0.27      | 0.2     |
| -0.143333 | -0.033    | -0.132    | 0.09    | 0.075333  | -0.055  | -0.1      | 0.01      | -0.042  |
| 0.216667  | 0.029333  | 0.466667  | 0.3     | 0.316667  | 0.395   | 0.275     | 0.524     | 0.285   |
| 0.122333  | -0.033667 | 0.343     | 0.279   | 0.31      | 0.2795  | 0.23775   | 0.301667  | 0.2375  |
| 0.183333  | 0.02      | 0.466667  | 0.315   | 0.41      | 0.215   | 0.205     | 0.497     | 0.345   |
| -0.026667 | 0.073333  | 0.333333  | 0.47    | 0.1       | 0.32    | 0.3425    | 0.349333  | 0.36    |
| 0.003333  | 0.129     | -0.049333 | 0.0505  | -0.146667 | 0.1     | -0.00575  | 0.088667  | 0.035   |
| 0.124333  | -0.013333 | 0.060667  | 0.1285  | 0.260667  | 0.0695  | 0.062     | 0.194667  | 0.2485  |
| -0.541333 | -0.955    | -0.948333 | 0.086   | 0.59      | -1.11   | 0.206667  | -0.65     | -0.4    |
| -0.046667 | -0.16     | 0.126667  | -0.0455 | 0.126667  | 0.06    | 0.2125    | 0.046667  | 0.09    |
| 0.097     | -0.023667 | 0.354     | 0.1305  | 0.208333  | 0.155   | 0.12525   | 0.342     | 0.1715  |
| -0.166667 | -0.253333 | -0.093333 | -0.021  | -0.142667 | -0.115  | -0.1675   | -0.463333 | -0.105  |
| 0.073333  | -0.15     | 0.086667  | 0.2635  | 0.15      | 0.125   | 0.0975    | 0.14      | 0.225   |
| -0.2      | 0.15      | 0.12      | 0.3     | 0.37      | 0.03    | 0.276     | 0.293333  | 0.29    |
| -0.138333 | -0.183333 | 0.117     | 0.2215  | -0.023333 | 0.12    | 0.10025   | 0.034     | -0.03   |
| -1.806667 | -0.103333 | -0.003333 | 0.085   | -0.026667 | 0.095   | -0.025    | 0.146667  | -0.925  |
| -1.583333 | -0.233333 | -0.387667 | 0.3     | 0.464333  | -0.165  | 0.046     | 0.065     | -1.1665 |
| -0.803333 | 0.026667  | -0.22     | 0.09    | -0.086667 | 0.005   | -0.0525   | -0.211    | -0.345  |
| -0.423333 | 0.086667  | -0.046667 | -0.1    | -0.08     | 0.05    | -0.1      | -0.138333 | -0.145  |
| -0.55     | -0.19     | -0.05     | 0.04    | 0.143333  | -0.06   | -0.178    | 0.25      | 0.13    |
| 0.076667  | -0.126667 | 0.243333  | 0.36    | 0.026667  | 0.21    | 0.21      | 0.216667  | 0.215   |
| 0.043333  | -0.183333 | 0.280667  | 0.23    | 0.156667  | -0.0235 | 0.2625    | 0.356667  | 0.035   |
| 0.22      | -0.01     | 0.253333  | 0.285   | -0.053333 | 0.125   | 0.205     | 0.297     | 0.075   |
| 0.106667  | 0.266667  | -0.213333 | 0.59    | 0.82      | 0.38    | -0.096667 | 0.16      | 0.21    |
| -0.066667 | -0.063333 | 0.026667  | -0.0025 | 0.123333  | 0.12    | -0.075    | 0.005667  | 0.03    |
| 0.003333  | -0.34     | 0.14      | -0.0005 | 0.526667  | -0.125  | -0.03     | -0.051333 | -0.075  |
| -0.213333 | -0.263333 | 0.236667  | 0.115   | -0.153333 | -0.29   | -0.05075  | -0.015333 | 0.015   |
| -0.061    | 0.05      | 0.116667  | 0.183   | 0.34      | 0.18    | 0.11      | 0.206     | -0.105  |
| -0.135333 | -0.093333 | -0.18     | -0.08   | -0.244    | -0.415  | -0.159    | -0.130333 | -0.155  |
| -0.293333 | -0.243333 | -0.03     | 0.212   | -0.336667 | -0.165  | -0.1275   | -0.007    | -0.09   |
| 0.094333  | 0.074333  | 0.303     | 0.345   | 0.122333  | 0.24    | 0.1295    | 0.14      | 0.1445  |

|           |           |           |         |           |         |           |           |         |
|-----------|-----------|-----------|---------|-----------|---------|-----------|-----------|---------|
| 0.12      | -0.063333 | -0.064    | -0.015  | -0.15     | -0.135  | -0.0045   | 0.04      | 0.0775  |
| 0.343333  | -0.28     | 0.12      | -0.012  | 0.222667  | 0.4     | 0.006667  | 0.46      | 0.28    |
| 0.303333  | 0.03      | 0.326667  | 0.185   | 0.03      | 0.07    | 0.1425    | 0.006667  | 0.12    |
| 0.063333  | 0.247     | 0.266667  | 0.0305  | -0.102    | -0.1205 | 0.0065    | 0.073667  | 0.1635  |
| -0.243333 | -0.12     | 0.023333  | -0.275  | -0.156667 | 0.035   | -0.085    | 0.116667  | 0.185   |
| -0.116667 | 0.013333  | 0.06      | 0.0695  | 0.063333  | 0.085   | 0.16      | 0.123333  | 0.1     |
| 0.21      | 0.3       | 0.306667  | 0.245   | -0.123333 | 0.195   | 0.16      | 0.25      | 0.255   |
| 0.113333  | -0.126667 | -0.056667 | 0.03    | -0.266667 | 0.035   | -0.0775   | -0.18     | -0.035  |
| 0.05      | 0.03      | 0.233333  | 0.185   | -0.063333 | -0.005  | 0.06      | 0.08      | 0.26    |
| -0.023333 | -0.356667 | 0.013333  | -0.0345 | 0.063333  | 0.19    | 0.015     | 0.123333  | 0.035   |
| 0.133333  | 0.043333  | 0.213333  | 0.255   | -0.246667 | 0.155   | 0.025     | 0.1       | 0.125   |
| 0.100667  | -0.127    | 0.035667  | 0.1645  | -0.283333 | 0.155   | 0.18025   | 0.29      | 0.475   |
| -0.16     | -0.366667 | -0.093333 | -0.067  | -0.033333 | 0.135   | 0.0615    | 0.15      | 0.41    |
| 0.1015    | -0.060667 | -0.05     | -0.6    | 0.034     | -0.8025 | -0.593667 | -0.2475   | 0.07    |
| 0.152333  | -0.08     | 0.267667  | 0.2175  | 0.066667  | 0.08    | 0.19325   | 0.116667  | 0.05    |
| -0.036667 | -0.25     | -0.042333 | -0.11   | -0.153333 | -0.045  | -0.11425  | 0.025     | -0.015  |
| -0.1      | 0.01      | 0.11      | 0.1255  | 0.053333  | 0.155   | 0.1425    | -0.126667 | -0.035  |
| 0.153333  | 0.13      | 0.056667  | 0.376   | 0.04      | 0.13    | -0.0175   | 0.066667  | 0.08    |
| -0.106667 | -0.046667 | 0.246667  | 0.23    | 0.24      | 0.125   | 0.04075   | 0.315     | 0.275   |
| 0.076667  | -0.063333 | 0.15      | -0.045  | -0.073333 | 0.01    | 0.0475    | 0.096667  | 0.02    |
| -0.186667 | -0.256667 | -0.206667 | -0.1805 | 0.003667  | -0.125  | 0.0055    | -0.04     | 0.05    |
| -0.09     | -0.293333 | -0.11     | 0.1     | -0.186667 | -0.145  | -0.05725  | 0.201333  | 0.055   |
| -0.110667 | 0.224     | -0.131333 | -0.375  | -0.203667 | -0.089  | 0.038     | 0.152333  | 0.085   |
| 0.003333  | -0.416667 | -0.09     | 0.089   | 0.013333  | -0.07   | 0.074     | 0.185     | 0.145   |
| 0.273333  | 0.036667  | 0.146667  | 0.23    | -0.15     | 0.275   | 0.0575    | 0.32      | 0.065   |
| -0.073333 | -0.136667 | 0.15      | 0.27    | -0.06     | -0.005  | -0.035    | 0.026667  | -0.02   |
| 0.091667  | -0.527333 | 0.114333  | 0.16    | 0.063333  | 0.1755  | 0.16775   | 0.315667  | -0.0875 |
| -0.471    | -0.350667 | -0.287333 | -0.079  | -0.484333 | -0.54   | -0.430333 | -0.2065   | -0.25   |
| 0.13      | 0.123333  | 0.36      | 0.22    | -0.023333 | 0.305   | 0.055     | 0.106667  | 0.325   |
| -0.406667 | -0.257333 | -0.011667 | 0.061   | -0.316667 | 0.005   | -0.06225  | -0.085667 | -0.085  |
| 0.073667  | -0.107    | 0.136333  | 0.155   | 0.218667  | 0.068   | 0.1095    | 0.111333  | 0.092   |
| -0.303333 | -0.54     | -0.156667 | -0.16   | -0.213333 | 0.045   | -0.11     | -0.035    | 0.05    |
| 0.1       | 0.126667  | 0.273333  | -0.06   | 0.08      | 0.145   | 0.2225    | 0.12      | 0.235   |
| -0.27     | 0.196667  | 0.246667  | 0.205   | 0.043667  | 0.385   | 0.25      | 0.506667  | 0.26    |
| 0.253333  | 0.036667  | 0.383333  | 0.355   | 0.2       | 0.375   | 0.1625    | 0.373333  | 0.26    |
| -0.323333 | 0.273333  | 0.171333  | 0.3565  | 0.083667  | -0.08   | 0.25      | -0.285    | 0.155   |
| 0.06      | 0.21      | 0.328667  | 0.265   | 0.073333  | 0.215   | 0.135     | 0.233333  | 0.14    |
| 0.046667  | 0.176667  | 0.506667  | 0.63    | 0.083333  | 0.38    | 0.275     | 0.402667  | 0.105   |
| -0.621667 | -0.19     | -1.532667 |         | -0.805667 | -0.485  | -0.5985   | -1.141    | -1.005  |
| 0.315     | 0.206667  | -1.996667 |         | -0.09     | 0.14    | -0.721667 | 0.64      | -1.36   |
| 0.08      | 1.01      | -0.89     | -0.5165 | -1.163    | -0.875  | -0.35     | -0.383333 | -0.165  |
| 0.106667  | -0.09     | 0.22      | 0.135   | -0.106667 | 0.065   | -0.0825   | 0.056667  | -0.055  |
| 0.11      | 0.1       | 0.223333  | 0.115   | -0.086667 | 0.11    | 0.14      | 0.143333  | 0.22    |
| 0.133333  | -0.133333 | 0.053333  | 0.325   | -0.075333 | 0.18    | 0         | 0.195     | 0.02    |
| -0.276667 | -0.175333 | -0.056667 | -1.41   | -0.303333 | -0.25   | -0.01     | -0.337333 | -0.05   |
| 0.166667  | 0.323333  | -0.106667 | 0.375   | 0.303333  | 0       | 0.11      | 0.179333  | 0.075   |
| 0.016667  | -0.113333 | 0.11      | 0.195   | -0.236667 | -0.26   | 0.0675    | 0.04      | 0.045   |
| 0.266667  | 0.043333  | 0.113333  | 0.453   | 0.48      | 0.54    | 0.2575    | 0.535333  | 0.265   |
| 0.076667  | -0.233333 | 0.43      | 0.1825  | -0.06     | 0.085   | 0.047     | 0.192333  | 0.05    |
| -0.12     | 0.09      | 0.12      | 0.175   | -0.133333 | 0.06    | -0.0275   | 0.16      | 0.005   |
| -0.343333 | -0.203333 | -0.113333 | 0.28    | -0.3      | -0.245  | -0.085    | -0.14     | -0.34   |
| 0.177667  | 0.046667  | 0.233333  | 0.5815  | 0.029667  | 0.2365  | 0.152     | 0.205     | 0.171   |
| 0.096667  | 0.076667  | -0.02     | 0.0705  | -0.163333 | 0.005   | -0.1425   | -0.163333 | 0.235   |
| 0.11      | 0.01      | 0.093333  | 0.11    | -0.016667 | -0.105  | -0.04     | 0.123333  | 0.045   |
| -0.093333 | -0.003333 | 0.333333  | 0.01    | 0.13      | 0.08    | 0.0825    | 0.133333  | 0.065   |

|           |           |           |         |           |         |           |           |         |
|-----------|-----------|-----------|---------|-----------|---------|-----------|-----------|---------|
| -0.65     | -0.374333 | -0.066667 | 0.2155  | -0.223333 | -0.32   | 0.1505    | 0.100667  | -0.045  |
| -0.29     | -0.066667 | 0.179333  | 0.08    | -0.096667 | 0.1     | -0.1225   | -0.04     | -0.185  |
| -0.383333 | -0.06     | 0.073333  | -0.215  | -0.36     | -0.05   | -0.121    | -0.065333 | 0.03    |
| -2.203333 | 0.396667  | -2.281667 | -2.346  | -1.709667 | -1.685  | -2.07625  | -2.275    | -0.985  |
| -1.832    | 0.627333  | -2.046667 | -1.56   | -0.749    | -1.778  | -1.43     | -1.466667 | -0.769  |
| -2.023333 | -3.449667 | -1.026667 | -2.765  | -1.64     | -1.68   | -1.465    | -1.7      | -1.245  |
| -0.035    | 0.125333  | -0.270333 | -0.29   | -0.186    | 0.412   | 0.0465    | -0.155    | 0.124   |
| -0.57     | 0.28      | -0.246667 | -0.335  | -0.026667 | 0.065   | -0.2      | -0.3      | 0.035   |
| -1.863333 | 0.852333  | -0.646667 | 0.7125  | 0.653333  | 0.8     | -0.5275   | -2.51     | 0.565   |
| -1.49     | 0.606667  | -0.546667 | 0.97    | 0.76      | 0.7     | -0.2625   | -0.813667 | 0.555   |
| -1.793333 | -0.296667 | -0.790333 | -0.0195 | 0.84      | 0.1     | -0.385    | -0.449333 | -0.365  |
| -1.528333 | 0.84      | -1.156667 | 0.8765  | 0.356     | 1.1     | -0.295    | -1.885    | 0.57    |
| -1.526667 | 0.45      | -0.798333 | 0.35    | 0.983667  | 0.415   | 0.16825   | -0.696667 | 0.1715  |
| -2.426333 | 0.876667  | -1.635    | -0.18   | 0.353333  | -0.01   | -0.8525   | -1.497667 | 0.415   |
| -1.583333 | 0.576667  | -1.174333 | -0.3275 | 0.661     | -0.255  | -0.96     | -1.475    | -0.465  |
| -1.353333 | 0.926667  | -0.65     | 0.724   | 0.686667  | 0.55    | -0.32     | -0.716667 | -0.405  |
| 0.243333  | 0.213333  | 0.08      | 0.07    | 0.01      | 0.215   | -0.04     | 0.086667  | 0.03    |
| 0.39      | 0.053333  | 0.13      | 0.155   | -0.266667 | 0.22    | 0.0125    | 0.13      | 0.005   |
| 0.3       | 0.140333  | 0.436667  | 0.445   | 0.35      | 0.275   | 0.2875    | 0.426667  | 0.23    |
| -0.27     | 0.256667  | -0.283333 | 0.435   | 0.233333  | 0.305   | -0.2975   | -0.3      | -0.04   |
| 0.12      | -0.013333 | -0.013333 | 0.275   | 0.083333  | 0.12    | -0.0275   | 0.066667  | 0.155   |
| 0.026667  | 0.093333  | 0.143     | 0.165   | 0.216667  | 0.35    | 0.055     | 0.18      | 0.165   |
| -0.206667 | -0.18     | 0.11      | 0.284   | 0.036667  | 0.245   | 0.025     | 0.169667  | 0.02    |
| -0.076667 | -0.341    | 0.027333  | 0.18    | 0.053333  | 0.032   | -0.06     | -0.006667 | -0.055  |
| -0.01     | -0.036667 | 0.283333  | 0.235   | -0.093333 | 0.18    | 0.0525    | 0.115333  | -0.03   |
| -1.436667 | -0.133333 | 0.208667  | 0.35    | -0.166667 | 0.33    | -0.2305   | -0.716667 | -0.075  |
| -0.683333 | -0.206667 | -0.02     | 0.09    | 0.01      | -0.3545 | -0.216667 | 0.015     | -0.03   |
| -0.123333 | -0.09     | -0.073333 | -0.01   | -0.375667 | -0.055  | -0.055    | -0.134667 | -0.025  |
| -0.003333 | -0.21     | -0.136333 | 0.03    | 0.726333  | 0.06    | -0.0675   | -0.054667 | 0.155   |
| -0.066667 | 0.286667  | 0.273333  | 0.295   | 0.193333  | 0.205   | 0.0775    | 0.025667  | 0.145   |
| -0.16     | -0.19     | 0.28      | 0.02    | 0.046667  | 0.15    | 0.0425    | 0.073333  | 0.04    |
| 0.133333  | 0.12      | 0.156667  | 0       | -0.183333 | -0.095  | 0.0225    | 0.066667  | 0.23    |
| -0.102    | 0.079333  | 0.140333  | 0.141   | 0.061333  | 0.05    | 0.0075    | 0.117667  | 0.27    |
| -0.31     | -0.68     | -0.195333 | -0.013  | -0.065    | -0.36   | -0.436667 | -0.245    | 0.03    |
| -0.102333 | -0.133333 | -0.179333 | 0.176   | -0.243333 | -0.0965 | -0.201    | 0.205     | 0.017   |
| -0.09     | 0.066667  | 0.153333  | 0.185   | 0.31      | 0.143   | 0.11      | 0.34      | 0.075   |
| -0.24     | -0.183333 | -0.220667 | 0.01    | -0.38     | -0.435  | -0.3125   | -0.39     | 0       |
| 0.093333  | 0.02      | 0.046667  | 0.019   | -0.126667 | -0.015  | -0.08     | -0.12     | -0.08   |
| 0.086667  | 0.066667  | 0.142333  | 0.135   | -0.313333 | 0.068   | 0.085     | 0.206667  | 0.035   |
| 0.186667  | 0.023333  | 0.066667  | 0.02    | -0.026667 | 0.125   | 0.1975    | 0.286667  | 0.175   |
| 0.266667  | 0.066667  | 0.32      | 0.38    | 0.183333  | 0.395   | 0.245     | 0.296667  | 0.02    |
| 0.656667  | 0.382     | -0.92     | 0.589   | 0.460333  | 0.5     | 0.1065    | 0.118     | 0.685   |
| 0.106667  | 0.27      | 0.04      | 0.41    | 0.15      | -0.08   | 0.0375    | 0.093333  | 0.16    |
| -0.126667 | -0.026667 | -0.166667 | 0.01    | -0.162667 | 0.125   | -0.10425  | 0.04      | 0.065   |
| 0.056667  | 0.06      | 0.26      | 0.255   | 0.236667  | 0.235   | 0.09      | 0.371667  | 0.14    |
| 0.306667  | -0.006667 | 0.193333  | 0.2     | -0.156667 | 0.091   | 0.15      | 0.163333  | 0.06    |
| -0.301    | -0.327667 | -0.483333 | 0.1     | 0.543     | -0.61   | 0.045     | 0.34      | 0.2875  |
| 0.046667  | -0.063333 | -0.196667 | 0.05    | -0.502667 | -0.275  | -0.155    | -0.374667 | -0.285  |
| -0.075    | -0.175    | 0.03      | -0.26   | -0.03     | 0.01    | -0.096667 | 0.03      | 0.06    |
| -0.126667 | 0.016667  | -0.113333 | -0.285  | -0.353333 | -0.045  | -0.14     | -0.096667 | -0.16   |
| 0.283333  | 0.193333  | 0.413333  | 0.09    | 0.363333  | 0.155   | 0.325     | 0.366667  | 0.355   |
| 0.173333  | -0.036667 | 0.066667  | 0.15    | -0.19     | 0.175   | -0.0225   | -0.11     | -0.05   |
| 0.05      | 0.253333  | -0.08     | 0.43    | 0.256667  | 0.14    | 0.2075    | 0.17      | 0.285   |
| 0.316     | -0.549333 | -0.415333 | 0.16    | -0.2905   | -0.2955 | -0.153667 | -0.06     | -0.3125 |
| 0.006667  | -0.24     | -0.043333 | 0.2475  | -0.123333 | 0.0615  | 0.13425   | 0.100333  | 0.03    |

|           |           |           |         |           |         |          |           |         |
|-----------|-----------|-----------|---------|-----------|---------|----------|-----------|---------|
| 0.056667  | -0.056667 | 0.056667  | 0.005   | -0.326667 | 0.015   | -0.0875  | -0.046667 | 0.175   |
| 0.04      | -0.21     | 0.216667  | -0.14   | -0.22     | 0.035   | 0.09     | 0.023333  | 0.015   |
| 0.146667  | -0.106667 | 0.13      | 0.09    | -0.256667 | -0.035  | -0.075   | 0         | 0.17    |
| -0.19     | -0.346667 | -0.066333 | -0.2315 | -0.397    | -0.095  | -0.3885  | -0.393    | -0.185  |
| -0.05     | -0.133333 | 0.123333  | 0.255   | -0.02     | 0.11    | 0.1475   | 0.196667  | 0.025   |
| -0.04     | -0.173333 | -0.23     | -0.02   | 0.059667  | -0.035  | -0.01375 | 0.148333  | 0.125   |
| 0.207     | -0.008    | 0.266333  | 0.2175  | 0.196667  | 0.1505  | 0.022    | 0.175333  | 0.2245  |
| 0.026667  | -0.146667 | -0.01     | 0.09    | 0.096667  | 0.15    | 0.0225   | -0.133333 | 0.03    |
| -0.15     | -0.45     | -0.053333 | 0.145   | 0.09      | -0.015  | -0.1025  | 9.25E-18  | -0.07   |
| 0.076667  | 0.016667  | 0.253333  | 0.265   | 0.116667  | 0.05    | 0.075    | 0.183333  | 0.26    |
| 0.283333  | 0.033333  | 0.256667  | 0.275   | 0.056667  | 0.32    | 0.11     | 0.295     | 0.285   |
| -0.027    | 0.144     | -0.198    | -0.0555 | 0.456667  | 0.0595  | 0.0555   | 0.226333  | -0.1135 |
| -0.06     | -0.103333 | 0.403333  | 0.3005  | 0.03      | 0.28    | 0.15     | 0.417333  | 0.235   |
| -0.073333 | -0.2      | -0.21     | 0.305   | -0.36     | -0.37   | -0.03    | 0.01      | -0.2    |
| -0.116667 | -0.113333 | 0.046667  | -0.074  | -0.073333 | -0.12   | -0.1245  | -0.127    | -0.1    |
| 0.03      | -0.38     | 0.25      | 0.22    | 0.243333  | 0.235   | 0.145    | 0.24      | 0.2     |
| -0.119667 | 0.049333  | 0.04      | 0.388   | 0.125333  | 0.1655  | 0.164    | 0.3       | -0.25   |
| -0.003333 | -0.083333 | -0.08     | 0.42    | -0.48     | -0.085  | -0.1125  | 0.103333  | -0.09   |
| -0.083333 | -0.133333 | 0.166667  | 0.305   | -0.213333 | 0.105   | -0.03    | 0.126667  | 0.065   |
| 0.12      | -0.45     | -0.083333 | 0.31    | -0.21     | -0.43   | 8.67E-19 | 0.033667  | -0.035  |
| -0.3      | -0.070667 | -0.131    | 0.22    | -0.443333 | 0.031   | 0.0115   | -0.0425   | 0.039   |
| 0.3       | -0.02     | -0.273333 | 0.2     | 0.296667  | 0.04    | -0.055   | 0.083333  | -0.12   |
| 0.073333  | -0.133333 | 0.174667  | 0.23    | 0.013333  | 0.13    | 0.0375   | 0.121     | -0.005  |
| -0.096667 | 0.04      | -0.056667 | -0.01   | -0.44     | -0.175  | 0.065    | -0.023333 | -0.04   |
| 0.185     | 0.0435    | -0.050333 | 0.11    | 0.29      | 0.159   | 0.10325  | 0.208667  | 0.13    |
| -0.65     | -0.529333 | -2.016667 | -0.384  | 0.59      | -0.895  | -0.80325 | -0.8      | -0.725  |
| -2.133333 | 0.386667  | -1.888333 | -2.42   | -1.706667 | -1.46   | -1.101   | -0.03     | -1.135  |
| -1.916667 | 0.513333  | -2.553333 | -2.995  | -2.203333 | -2.32   | -1.155   | -0.07     | -1.4    |
| -0.06     | -0.106667 | 0.113333  | 0.01    | -0.303333 | 0.02    | -0.04    | 0.131     | -0.135  |
| 0.383333  | 0.11      | 0.399667  | 0.35    | 0.276667  | 0.35    | 0.3225   | 0.403333  | 0.305   |
| -0.046667 | 0.106667  | 0.163333  | 0.3     | -0.266667 | 0.155   | -0.0325  | 0.094333  | -0.05   |
| -0.196667 | -0.04     | -0.193333 | 0.1225  | -0.153333 | -0.035  | 0.0175   | -0.006667 | -0.03   |
| -0.122333 | -0.126333 | -0.097333 | 0.066   | -0.221667 | 0.065   | -0.02525 | -0.213667 | 0.18    |
| 0.082     | -0.087333 | 0.028333  | 0.3215  | 0.126667  | 0.165   | 0.19375  | 0.285667  | 0.1945  |
| 0.086667  | 0.133333  | 0.173667  | 0.245   | -0.186667 | 0.24    | 0.255    | 0.263333  | 0.165   |
| -1.686667 | -3.07     | -1.591667 | -2.17   | -1.403333 | -1.184  | -1.28675 | -1.783333 | -0.88   |
| 0.036667  | -3.606667 | -0.383333 | -1.365  | -0.34     | -0.59   | -0.1925  | -0.333333 | -0.275  |
| -0.369    | -3.380333 | -0.229667 | -0.5545 | -0.482333 | -0.46   | -0.09675 | -0.355    | -0.4    |
| -0.579    | -3.036667 | -0.516667 | -1.2565 | -0.756667 | -0.865  | -0.3665  | -0.417333 | -0.58   |
| -0.459667 | -2.776667 | -0.218667 | -0.38   | -0.27     | -0.21   | -0.27475 | -0.48     | -0.345  |
| -0.608333 | -1.966667 | -0.823333 | -1.5345 | -1.14     | -0.685  | -0.9155  | -1.193333 | -0.31   |
| -1.73     | -2.413333 | -0.57     | -1.26   | -2.028    | -1.4135 | -0.885   | -1.5805   | -2.325  |
| 0.353333  | -2.593333 | -1.863    | -1.925  | -1.558    | -1.69   | -1.2025  | -1.461667 | -0.81   |
| -0.196667 | -2.682    | -0.74     | -1.15   | -0.4      | -1.5675 | -1.17525 | -2.1225   | -1.035  |
| 0.043333  | -0.153333 | -0.026667 | 0.06    | -0.226667 | 0.03    | 0.0285   | -0.054    | -0.17   |
| -1.486667 | 0.633333  | -1.286667 | -1.2    | -1.343333 | -0.845  | -0.9325  | -0.98     | -0.54   |
| -0.256667 | 0.55      | -0.11     | -0.105  | -0.32     | -0.155  | -0.67    | -1.246667 | -0.24   |
| -0.24     | 0.573333  | -0.186667 | -0.175  | -0.32     | -0.205  | -0.18    | -0.255    | -0.175  |
| -0.331    | 0.622333  | -0.162667 | -0.227  | -0.465333 | -0.1265 | -0.3525  | -0.145667 | -0.0995 |
| -1.576667 | 0.326667  | -0.717333 | -1.855  | -1.193333 | -0.93   | -0.7825  | -1.195    | -0.835  |
| 0.606667  | 0.986667  | -1.08     | 0.64    | 0.61      | 0.855   | -0.6575  | -1.344    | -1.505  |
| 0.7       | 0.955     | -1.596333 | 0.94    | 0.6       | 0.635   | 1.02     | -1.435    | -2.977  |
| 0.66      | 0.57      | -0.856667 | 0.66    | -0.64     | 0.65    | -0.3225  | -0.373    | -1.255  |
| 1.093333  | 1.01      | -1.643333 | 0.495   | -1.46     | 0.585   | -0.495   | -1.213333 | -1.66   |
| 0.945     | 0.59      | -2.467333 | -1.8665 | -1.54     | -1.27   | -1.66525 | -1.817333 | -1.295  |

|           |           |           |         |           |         |           |           |         |
|-----------|-----------|-----------|---------|-----------|---------|-----------|-----------|---------|
| 0.656667  | 0.933333  | -2.166    | -2.5705 | -0.836667 | -1.805  | -1.6425   | -1.813333 | -1.205  |
| 1.17      | 1.173333  | -3.14     | -3.235  | -1.24     | -1.57   | -1.695    | -1.813333 | -1.485  |
| 0.735     | 0.365667  | -2.523    | -1.422  | -0.8615   | -1.759  | -0.896667 | -1.45     | -1.52   |
| -2.143333 | 0.88      | -1.206667 | 0.5     | 0.998333  | 0.48    | -0.02625  | -0.709    | -0.93   |
| -2.51     | 1.376667  | -0.976667 | 0.825   | 0.86      | 0.56    | -0.0125   | -0.286667 | -1.19   |
| -1.94     | 0.983333  | -2.781667 | -2.113  | -0.796667 | -1.885  | -1.36     | -1.741333 | -1.7    |
| -3.404    | 1.026667  | -2.453333 | -2.04   | -1.21     | -1.64   | -2.145    | -1.954333 | -1.865  |
| -2.143333 | 0.993333  | -2.64     | -3.14   | -2.02     | -2.22   | -1.6475   | -0.69     | -1.395  |
| -3.387    | 0.71      | -3.51     | -2.865  | -1.464    | -3.2905 | -2.273    | -0.463667 | -1.12   |
| -0.77     | 0.6865    | -5.006    |         | -2.437    | -2.8615 | -1.789    | -1.54     | -1.42   |
| -2.026    | 0.703333  | -1.998333 | -2.23   | -2.563333 | -2.175  | -2.089    | -0.726333 | -2.38   |
| -2.687    | 1.225     | -4.211333 | -4.0315 | -2.253333 | -3.0465 | -2.72875  | -2.75     | -1.883  |
| -2.35     | 1.003333  | -1.785    | -2.845  | -2.696667 | -2.233  | -2.3425   | -3.054333 | -2.775  |
| -2.396667 | 1.166     | -2.965333 | -3.17   | -2.173333 | -2.865  | -2.48     | -2.65     | -1.61   |
| -2.929667 | 0.66      | -3.013    | -2.08   | -1.912    | -2.41   | -1.84     | -2.3045   | -2.085  |
| -3.094    | 1.306667  | -2.658333 | -3.585  | -2.393333 | -3.467  | -3.13925  | -2.17     | -3.45   |
| 0.273333  | 1.433333  | -3.336667 | -3.555  | -2.673333 | -2.165  | -2.7825   | -3.024667 | -1.79   |
| 0.31      | 0.867     | -1.12     | -0.8365 | -0.936667 | -0.214  | -0.7525   | -1.492    | -0.895  |
| 0.713667  | 1.081     | -0.825    | 0.86    | 0.842333  | 0.7345  | -0.629    | -1.411    | -1.3145 |
| -3.31     | 0.264667  | -0.767667 | -2.03   | -1.037333 | -2.04   | -2.42     | -3.6      | -0.34   |
| -1.612333 | 0.663333  | -0.625333 | -1.276  | -1.594667 | -1.695  | -2.3025   | -2.766667 | 0.01    |
| -2.202    | 0.5165    | -1.081    | -2.169  | -2.406667 | -2.577  | -2.67525  | -1.602    | -0.4595 |
| -0.959    | 0.82      | 0.397     |         |           | -2.5115 | -1.3875   | -2.056    | -0.288  |
| -2.378667 | 1.042333  | -0.195667 | -2.17   | -1.698333 | -2.2965 | -2.343    | -2.637    | -0.4285 |
| -1.123333 | 0.49      | 0.552667  | -1.17   | -1.19     | -1.27   | -0.9425   | -1.666667 | -0.865  |
| -1.513    | 0.25      | -1.614333 | -0.34   | -1.13     | -1.0705 | -1.54825  | -1.939    | -0.016  |
| 0.076667  | 0.15      | 0.15      | 0.09    | 0.003333  | -0.075  | -0.1125   | -0.115333 | 0.115   |
| -0.683333 | -0.113333 | -0.5      | -0.235  | -0.416667 | -0.305  | -0.4525   | -0.36     | -0.25   |
| -0.41     | -0.063333 | -0.073333 | -0.05   | -0.243333 | -0.075  | -0.13875  | -0.143    | -0.18   |
| 0.063333  | -0.12     | 0.29      | 0.4025  | 0.03      | 0.0465  | 0.162     | 0.216333  | 0.015   |
| 0.22      | -0.053333 | 0.453333  | 0.24    | 0.466667  | 0.085   | 0.495     | 0.576333  | 0.06    |
| -0.1      | -0.066667 | 0.143333  | 0.387   | -0.016667 | 0.09    | 0.195     | 0.313333  | 0.14    |
| -0.393333 | -0.206667 | 0.006667  | 0.14    | 0.245     | -0.06   | -0.04     | -0.1535   | 0       |
| 0.143333  | 0.103333  | 0.17      | 0.29    | -0.28     | 0.115   | 0.13      | 0.226667  | 0.15    |
| 0.083333  | -0.032    | 0.252     | 0.2835  | 0.205     | 0.1625  | 0.18525   | 0.251333  | 0.312   |
| 0.056667  | -0.38     | 0.285667  | 0.111   | -0.024    | 0.15    | 0.12325   | 0.246333  | 0.06    |
| -0.24     | -0.18     | -0.06     | 0.075   | -0.473333 | -0.18   | -0.0875   | -0.233333 | -0.155  |
| 0.006667  | -0.33     | 0.21      | 0.22    | 0.113333  | -0.045  | -0.045    | 0.15      | -0.015  |
| -0.053333 | -0.353333 | -0.353333 | -0.055  | -0.166667 | -0.0865 | 0.0825    | -0.025    | -0.245  |
| 0.03      | 0.06      | 0.216667  | 0.22    | -0.34     | -0.035  | 0.02      | 0.169     | 0.11    |
| 0.06      | 0.163333  | 0.103333  | 0.28    | 0.126667  | 0.275   | 0.0575    | 0.063333  | 0.25    |
| -0.05     | -0.04     | -0.04     | -0.093  | -0.133333 | -0.105  | -0.1225   | -0.123333 | -0.07   |
| -0.046667 | 0.01      | -0.049667 | 0.125   | -0.376667 | -0.105  | -0.1255   | -0.073333 | -0.029  |
| 0.213333  | 0.014333  | 0.372     | 0.2665  | 0.253333  | 0.4225  | 0.251     | 0.462     | 0.1655  |
| -0.099    | 0.089333  | -0.138    | 0.176   | 0.17      | -0.0465 | 0.216     | 0.254667  | -0.0045 |
| -0.006667 | -0.16     | 0.196667  | 0.13    | 0.19      | -0.16   | 0.105     | 0.256667  | 0.045   |
| -0.263333 | -0.05     | 0.176667  | -0.058  | -0.056667 | 0.09    | -0.27     | -0.733333 | -0.87   |
| 0.126     | 0.034333  | 0.254     | 0.289   | 0.06      | 0.24    | -0.3075   | -0.703333 | -0.7045 |
| 0.056667  | 0.093333  | -0.13     | -0.15   | 0.003333  | 0.04    | -0.3025   | -0.336667 | -0.015  |
| -0.004    | -0.1      | 0.115333  | -0.1065 | 0.279667  | 0.02    | 0.00875   | 0.025333  | 0.18    |
| -0.146667 | -0.136667 | 0.006     | 0.05    | 0.191     | -0.085  | 0.016667  | 0.103333  | 0.05    |
| -0.661    | 0.312     | -0.795333 | -0.8925 | -0.346667 | -0.238  | -0.58375  | -0.724667 | -0.4315 |
| -0.226667 | 0.166667  | -0.523333 | -0.483  | -0.193333 | 0.01    | -0.082    | -0.69     | -0.72   |
| 0.103333  | -0.193333 | 0.383333  | 0.29    | 0.176667  | 0.175   | -0.03     | 0.203333  | 0.125   |
| 0.135667  | -0.759667 | -0.466667 | -0.197  | 0.175     | -0.12   | -0.556667 | -0.1985   | -0.12   |

|           |           |           |         |           |         |           |           |         |
|-----------|-----------|-----------|---------|-----------|---------|-----------|-----------|---------|
| 0.1       | -0.033333 | -0.083333 | 0.21    | 0.05      | -0.02   | 0.0675    | 0.190333  | -0.295  |
| -0.073333 | 0.05      | 0.196667  | 0.18    | 0.236667  | 0.215   | 0.165     | 0.316667  | 0.165   |
| 0.060333  | -0.161667 | -0.084667 | -0.134  | -0.363333 | -0.1    | 0.04325   | -0.09     | -0.06   |
| -0.017333 | -0.137    | -0.092    | 0.065   | 0.043333  | 0.1865  | -0.088    | -0.077    | -0.2525 |
| -0.12     | -0.293333 | -0.776667 | -0.09   | 0.06      | -0.32   | -0.116667 | -0.145    | -0.04   |
| 0.036667  | -0.03     | -0.253333 | 0.22    | 0.09      | 0.12    | -0.0725   | 0.12      | 0.15    |
| -0.293333 | -0.256667 | -0.18     | 0.11    | 0.193333  | -0.065  | -0.0425   | -0.012333 | 0.08    |
| -0.21     | -0.08     | -0.096667 | -0.12   | 0.66      | -0.085  | -0.21     | 0         | 0.275   |
| 0.233333  | 0.07      | 0.183333  | 0.52    | -0.136667 | -0.07   | 0.04      | 0.106     | 0.035   |
| 0.053333  | -0.103333 | 0.12      | 0.0045  | 0.2       | 0.185   | 0.0125    | 0.125     | 0.165   |
| -0.306667 | -0.275    | -0.516667 | 0.11    | -0.377    | 0.0755  | 0.02025   | -0.204333 | -0.55   |
| 0.193333  | -0.043333 | 0.05      | 0.13    | -0.27     | 0.04    | -0.0725   | -0.073333 | 0.115   |
| -0.056667 | -0.432333 | -0.890667 | -0.5965 | -0.84     | -0.385  | -0.048667 | -0.4815   | -0.1285 |
| 0.083333  | 0.037667  | -0.060333 | -0.3095 | 0.048333  | -0.18   | -0.1135   | -0.3665   | 0.14    |
| 0.172333  | 0.131     | 0.175667  | 0.261   | 0.262333  | 0.144   | 0.2005    | 0.272333  | 0.1795  |
| -0.053333 | -0.29     | -0.083333 | -0.064  | -0.07     | -0.26   | 0.0575    | -0.077667 | -0.09   |
| 0.086667  | 0.18      | 0.023333  | 0.25    | -0.09     | 0.23    | -0.02     | 0.126667  | -0.025  |
| -0.043333 | -0.04     | 0.14      | 0.22    | 0.186667  | 0.07    | 0.08      | 0.1       | -0.075  |
| -0.554333 | -0.056667 | -0.093333 | -0.093  | -0.276667 | 0.08    | -0.07825  | -0.02     | -0.07   |
| -0.109333 | 0.334333  | -0.83     | -0.763  |           | -0.1    | 0.6315    | -0.12     | 0.435   |
| -1.183    | -0.294333 | -0.938333 | -2.11   | -0.483333 | -0.4865 | -0.45525  | -0.654667 | -0.3495 |
| 0.11      | -0.333333 | -0.876667 | -0.255  | -0.046667 | -0.275  | 0.0225    | -0.173333 | 0.075   |
| 0.016667  | -0.24     | -0.06     | -0.075  | 0.023333  | -0.05   | 0.14      | 0.07      | 0.085   |
| -0.21     | -0.18     | 0.16      | 0.067   | 0.233333  | 0.175   | 0.11      | 0.213333  | -0.06   |
| 0.027     | -0.273333 | 0.132     | 0.333   | 0.016667  | 0.045   | 0.12425   | 0.106667  | 0.165   |
| -0.108667 | -0.145    | 0.24      | 0.14    | 0.138333  | 0.19    | 0.2435    | 0.365     | -0.409  |
| -0.396667 | 0.013333  | -9.25E-18 | 0.12    | -0.42     | -0.09   | -0.165    | -0.066667 | -0.035  |
| -0.213333 | -0.056667 | -0.176667 | 0.156   | -0.193333 | -0.17   | -0.13     | -0.13     | -0.175  |
| -1.95     | 0.176667  | -0.31     | 0.1145  | -0.106667 | -0.035  | -0.385    | -0.646667 | -0.365  |
| -1.803333 | 0.181667  | 0.21      | 0.484   | 0.136667  | 0.255   | 0.21975   | 0.267667  | 0.13    |
| -3.526667 | -0.206667 | -0.23     | -0.387  | -0.196667 | -0.115  | -0.205    | -0.386667 | -0.245  |
| -3.140667 | 0.093333  | 0.1       | 0.08    | 0.13      | 0.005   | 0.2275    | 0.084333  | 0.12    |
| -3.503333 | -0.203333 | 0.153333  | 0.17    | -0.133333 | 0.05    | 0.0675    | 0.13      | 0       |
| -3.253333 | -0.306667 | 0.146667  | 0.03    | -0.59     | -0.03   | -0.01     | -0.086667 | -0.17   |
| -3.631    | -0.09     | 0.204     | 0.1835  | -0.126667 | 0.33    | 0.17425   | 0.183333  | 0.15    |
| -3.81     | 0.096667  | 0.233333  | 0.17    | 0.11      | 0.085   | 0.1775    | 0.24      | -1.75   |
| -3.985    | -0.06     | 0.176667  | 0.175   | -0.043333 | 0.055   | 0.0525    | 0.186667  | -2.035  |
| -3.216667 | -0.133333 | -0.063333 | -0.095  | -0.24     | -0.065  | -0.015    | -0.186667 | -1.92   |
| -3.34     | -0.06     | 0.003333  | 0.105   | -0.293333 | -0.015  | 0.01      | 0.02      | -1.755  |
| -4.1      | -0.146667 | 0.156667  | 0.47    | 0.01      | 0.325   | 0.135     | 0.22      | -2.365  |
| -2.92     | 0.013333  | 0.263333  | 0.475   | -0.01     | 0.23    | 0.1175    | 0.086667  | -1.81   |
| -3.585333 | -0.32     | -0.143333 | -0.009  | -0.213    | -0.03   | -0.025    | -0.143333 | -2.235  |
| -3.933667 | -0.263333 | -0.183333 | -0.355  | -0.263333 | -0.195  | 0.026667  | -0.143667 | -3.97   |
| -4.477333 | -0.007333 | 0.041667  | 0.506   | -0.141333 | 0.079   | 0.03875   | 0.07      | -2.112  |
| -3.433333 | 0.083333  | 0.146667  | 0.155   | -0.126667 | 0.11    | 0.0975    | 0.093333  | -2.205  |
| -3.87     | -0.163333 | 0.094667  | 0.15    | -0.17     | 0.155   | 0.17      | 0.193333  | -2.265  |
| -3.2      | 0.113333  | 0.283333  | 0.41    | -0.053333 | 0.27    | 0.19      | 0.393333  | -1.98   |
| -2.76     | 0.133333  | -0.056667 | 0.245   | -0.122333 | 0.04    | 0.1       | -0.143333 | -2.36   |
| -4.227667 | -0.12     | -0.030333 | 0.23    | 0.223333  | 0.225   | 0.0525    | 0.12      | -2.563  |
| -2.91     | -0.28     | -0.183333 | 0       | -0.393333 | -0.265  | -0.1525   | -0.553333 | -1.565  |
| -3.066667 | -0.02     | 0.113333  | 0.165   | -0.166667 | -0.105  | -0.06     | -0.08     | -2.025  |
| -2.5      | 0.153333  | 0.04      | -0.01   | -0.26     | -0.055  | -0.0475   | 0.126667  | -1.98   |
| -2.823333 | -0.16     | -0.4      | 0.015   | -0.28     | 0.025   | -0.3575   | -0.333333 | -2.069  |
| -0.626667 | 0.16      | 0.046667  | 0.44    | -0.073333 | 0.045   | 0.0775    | 0.163333  | -1.795  |
| -0.28     | 0.333333  | -0.48     | -0.425  | -0.783333 | -1.22   | -0.295    | -0.18     | -1.03   |



|           |           |           |         |           |         |          |           |         |
|-----------|-----------|-----------|---------|-----------|---------|----------|-----------|---------|
| -0.026667 | 0.106667  | 0.173333  | 0.03    | -0.043333 | 0.1     | 0.0675   | 0.293333  | -0.0645 |
| -0.03     | -0.015    | 0.267     | 0.077   | -0.03     | 0.0995  | 0.09975  | 0.235667  | 0.074   |
| -0.466667 | -0.483333 | -0.103333 | -0.505  | -0.181333 | -0.045  | -0.27    | -0.08     | -0.19   |
| 0.073333  | 0.056667  | 0.163333  | 0.42    | -0.076667 | 0.02    | 0.06725  | 0.106667  | -0.035  |
| -0.076667 | -0.02     | -0.023333 | 0.12    | -0.201    | -0.18   | -0.1075  | -0.027333 | -0.045  |
| 0.04      | 0.32      | 0.156667  | 0.651   | 0.37      | 0.155   | 0.1175   | 0.197     | 0.155   |
| 0.006667  | -0.023333 | 0.163333  | 0.145   | -0.09     | 0.145   | 0.115    | 0.059     | 0.145   |
| 0.22      | -0.13     | 0.336667  | 0.14    | 0.34      | 0.415   | 0.4525   | 0.54      | 0.14    |
| 0.043333  | 0.036667  | 0.27      | 0.225   | 0.063333  | -0.05   | 0.0675   | 0.133333  | 0.105   |
| -0.143333 | -0.266667 | 0.013333  | -0.04   | 0.236667  | 0.025   | -0.04525 | 0.013667  | 0.09    |
| -0.41     | 0.07      | -0.393333 | -0.41   | -0.2      | -0.14   | -0.4925  | -0.486667 | -0.475  |
| 0         | -0.546333 | -0.3745   |         | 1         | -0.59   | 0.2995   | -0.479    | -0.74   |
| -0.187667 | -0.13     | 0.32      | 0.05    | -0.103333 | 0.11    | 0.085    | 0.186667  | -0.09   |
| -0.647    | -0.277    | -0.514667 |         | 0.07      | -0.62   | -0.45    | -0.5145   | -0.41   |
| -0.076667 | -0.32     | -0.123333 | -0.025  | 0.12      | -0.115  | -0.0025  | -0.035    | -0.19   |
| -0.155    | -0.564333 | -0.263333 | -0.566  | -0.044333 | -0.395  | 0.162667 | -0.36     | -0.1395 |
| 0.15      | -0.013333 | 0.333333  | 0.385   | 0.176667  | 0.26    | 0.22     | 0.299     | 0.315   |
| -0.126333 | -0.043667 | -0.213667 | 0.145   | -0.147    | 0.3     | 0.144    | 0.34      | 0.1135  |
| 0.163333  | 0.26      | 0.44      | 0.3     | 0.193333  | 0.265   | 0.2875   | 0.426333  | 0.36    |
| -0.023333 | 0.096667  | 0.236667  | 0.115   | -0.136    | 0.045   | -0.055   | -0.065333 | -0.03   |
| -0.176667 | -0.32     | 0.23      | 0.135   | -0.193333 | 0.17    | 0.0225   | 0.153333  | -0.15   |
| 0.103333  | -0.083333 | 0.283333  | 0.07    | -0.24     | 0.255   | 0.195    | 0.243333  | 0.1     |
| 0.142     | -0.034333 | 0.366     | 0.3615  | 0.29      | 0.19    | 0.323    | 0.561333  | 0.291   |
| 0.018333  | -0.234667 | 0.098667  | 0.1115  | -0.286333 | 0.045   | 0.16425  | 0.26      | 0.08    |
| -0.171    | 0.026333  | -0.209    | -0.0495 | -0.472333 | 0.29    | -0.011   | -0.075    | 0.035   |
| 0.09      | 0.063333  | 0.333333  | 0.015   | 0.093333  | 0.135   | 0.39275  | 0.300333  | 0.115   |
| -0.096667 | -0.056667 | 0.172     | -0.04   | 0.026667  | 0.195   | 0.1525   | 0.253333  | 0.16    |
| 0.183333  | -0.126667 | 0.28      | 0.245   | 0.256667  | 0.22    | 0.22675  | 0.375     | 0.275   |
| 0.006667  | -0.029667 | 0.122333  | 0.0595  | 0.182     | 0.028   | -0.00975 | 0.531667  | 0.103   |
| -0.08     | -0.026667 | 0.063333  | 0.23    | -0.113333 | 0.2125  | 0.025    | 0.23      | -0.11   |
| -0.053333 | 0.116667  | 0.01      | 0.145   | -0.322333 | 0.0285  | -0.0225  | -0.096667 | -0.025  |
| 0.133333  | -0.026667 | 0.156667  | 0.18    | -0.006667 | 0.155   | 0.0915   | 0.136667  | 0.14    |
| 0.003333  | 0.056667  | 0.106667  | 0.205   | 0.176667  | 0.25    | 0.1575   | 0.276667  | 0.145   |
| -0.043333 | 0.03      | -0.22     | 0.36    | 0.063333  | 0.1     | 0.225    | 0.255     | -0.045  |
| -0.073333 | -0.103333 | 0.126667  | 0.175   | 0.056667  | -0.075  | 0.12475  | 0.07      | 0.085   |
| 0.12      | 0.106667  | 0.31      | 0.27    | 0.145667  | 0.175   | 0.21     | 0.215667  | -0.075  |
| -0.076667 | -0.13     | 0.02      | 0.41    | -0.016667 | 0.07    | -0.0975  | -0.057667 | 0       |
| -0.093333 | -0.04     | 0.136667  | 0.225   | -0.156667 | -0.02   | 0.07     | 0.256667  | 0.08    |
| -0.356667 | -0.67     | 0.173333  | -0.02   | -0.04     | 0.235   | 0.0725   | 0.233333  | 0.11    |
| -0.183333 | -0.19     | 0.083333  | -0.025  | -0.096667 | -0.025  | -0.07    | -0.006667 | 0.085   |
| 0.19      | -0.096667 | 0.39      | 0.215   | 0.01      | 0.295   | 0.1975   | 0.313333  | 0.06    |
| -0.05     | 0.136667  | 0.47      | 0.14    | 0.41      | 0.041   | 0.25     | 0.426667  | 0.165   |
| -1.986    | -3.697333 | -1.147667 | -2.842  | -1.808    | -2.0025 | -1.09325 | -0.673    | -0.078  |
| 0.938     | 0.743333  | -1.204667 | 0.79    | 0.646667  | 0.76    | -0.051   | -1.006    | -1.15   |
| 0.243333  | 0.815333  | -1.226667 | 0.46    | 0.17      | -0.0385 | -0.6375  | -1.018333 | -1.265  |
| 0.148333  | -0.071333 | -0.296667 | 0.1055  | 0.171667  | -0.485  | -0.20475 | -0.196    | -0.23   |
| 0.02      | 0.096667  | 0.136667  | 0.08    | 0.193333  | 0.035   | -0.0025  | 0.006667  | -0.075  |
| 0.18      | -0.11     | 0.106667  | 0.16    | -0.023333 | 0.17    | 0.1325   | 0.166667  | 0.17    |
| 0.01      | 0.126667  | 0.25      | 0.225   | 0.271     | 0.17    | 0.0425   | 0.185667  | 0.235   |
| 0.223333  | 0.07      | 0.14      | -0.03   | -0.463333 | -0.105  | 0.0075   | -0.05     | 0.11    |
| -0.347    | 0.017667  | -0.509667 | -0.084  | -0.306667 | -0.1175 | -0.393   | -0.436667 | 0.1045  |
| -0.29     | -0.05     | -0.366667 | -0.075  | -0.53     | -0.225  | -0.13    | -0.183333 | 0.045   |
| 0.066667  | -0.07     | 0.196667  | 0.14    | -0.06     | 0.215   | 0.135    | 0.18      | 0.21    |
| -0.062    | -0.140667 | -0.097333 | 0.096   | -0.18     | -0.2    | -0.2545  | -0.125333 | -0.025  |
| -0.263333 | -0.32     | -0.007    | 0.015   | -0.18     | -0.06   | -0.1125  | -0.116667 | -0.04   |

|           |           |           |         |           |        |           |           |         |
|-----------|-----------|-----------|---------|-----------|--------|-----------|-----------|---------|
| -0.601667 | -0.166333 | -0.256667 | 0.04    | -0.023333 | -0.36  | -0.285    | 0.0415    | -0.035  |
| 0.09      | 0.083333  | 0.18      | 0.255   | 0.143333  | 0.185  | 0.265     | 0.322     | 0.1     |
| 0.04      | -0.093333 | -0.044333 | 0.1135  | -0.39     | -0.28  | 0.0115    | -0.318    | -0.11   |
| -0.273333 | -0.19     | 0.193333  | 0.1     | 0.043333  | 0.065  | -0.03775  | 0.006333  | -0.115  |
| -0.066667 | -0.493333 | -0.466667 | -0.3775 | -0.473333 | -0.25  | -0.22325  | -0.106333 | -0.52   |
| -0.309667 | 0.114     | 0.082     | -0.113  | 0.248333  | 0.018  | 0.12225   | 0.118     | 0.0995  |
| -0.033333 | 0.126667  | 0.063333  | -0.045  | -0.093333 | -0.005 | 0.0575    | -0.26     | 0.22    |
| -0.16     | -0.586667 | -0.31     | -0.068  | 0.686667  | -0.15  | 0.06      | 0.084333  | -0.245  |
| -0.076667 | -0.376667 | 0.103333  | 0.005   | -0.02     | -0.075 | 0.0225    | 0.020333  | -0.535  |
| 0.163333  | -0.316667 | 0.16      | 0.07    | -0.233333 | 0.03   | 0.0075    | -0.076667 | -0.705  |
| 0.068667  | -3.47E-18 | 0.205333  | 0.2     | -0.186667 | 0.16   | 0.1275    | 0.217333  | 0.2895  |
| 0.176667  | 0.15      | 0.213333  | 0.05    | -0.276667 | 0.01   | 0.0675    | 0.03      | 0.125   |
| -0.455    | -0.224    | -0.026667 | -0.054  | -0.393    | -0.335 | -0.199    | -0.332333 | -0.215  |
| -0.256667 | -0.02     | 0.36      | -0.055  | -0.046667 | 0.015  | 0.04      | 0.032     | 0.19    |
| -0.28     | -0.32     | 0.14      | -0.195  | -0.528    | 0.02   | -0.215    | -0.176667 | -0.04   |
| -1.253667 | -2.23     | -0.894    | -1.289  | -1.040333 | -1.38  | -0.759333 | -0.646    | -0.175  |
| -0.646667 | -0.186667 | -0.241333 | -0.41   | -0.243333 | -0.615 | -0.5275   | -0.449667 | 0.06    |
| -0.233333 | -0.306667 | -0.09     | -0.095  | -0.02     | -0.365 | -0.1075   | -0.126667 | -0.065  |
| -0.286667 | 0.006667  | 0.176667  | 0.14    | -0.166667 | -0.01  | -0.08     | 0.073333  | 0.155   |
| -0.54     | -0.475    | -0.435    | 0.09    | 0.16      | -0.12  | 0.003333  | -0.0875   | -0.24   |
| -0.006667 | -0.013333 | 0.322667  | 0.2     | -0.046667 | 0.2    | 0.07      | 0.147     | 0.14    |
| 0.156667  | -0.05     | 0.143333  | 0.25    | -0.08     | 0.04   | 0.11      | -0.023333 | 0.13    |
| -0.006667 | -0.046667 | 0.293333  | 0.105   | 0.053333  | -0.055 | 0.2625    | 0.436667  | 0.235   |
| -0.083333 | 0.02      | 0.236667  | 0.165   | -0.096667 | 0.145  | -0.0425   | 0.086667  | 0.185   |
| 0.113333  | 0.03      | 0.12      | 0.4     | 0.003333  | 0.11   | 0.246667  | -0.005    | 0.11    |
| 0.14      | -0.036667 | 0.4       | 0.18    | 0.056667  | 0.415  | 0.245     | 0.3       | 0.195   |
| -0.293    | -0.016667 | 0.118667  | -0.1945 | -0.36     | -0.035 | -0.173    | -0.161667 | -0.125  |
| -0.349333 | -0.193333 | 0.08      | -0.07   | -0.363333 | -0.16  | -0.1025   | -0.036667 | 0.085   |
| 0.093333  | 0.09      | 0.33      | -0.04   | -0.066667 | 0.045  | 0.0575    | 0.182     | 0.17    |
| -0.046667 | -0.346667 | 0.083333  | 0.22    | 0.333333  | 0.155  | -0.01475  | 0.115667  | 0.08    |
| -0.003333 | -0.039667 | 0.236333  | 0.0975  | 0.15      | 0.198  | 0.06725   | 0.211     | 0.156   |
| -0.079333 | -0.120333 | 0.147667  | 0.2885  | 0.07      | 0.127  | 0.01525   | 0.062667  | 0.1265  |
| -0.053333 | 0.05      | 0.078333  | 0.07    | -0.136667 | 0.385  | 0.1075    | 0.053333  | 0.14    |
| -0.71     | -0.42     | -0.215667 | -0.4785 | 0.066667  | -0.02  | 0.0325    | -0.09     | 0.185   |
| 0.143333  | 0.04      | 0.186667  | 0.165   | 0         | 0.265  | 0.11      | 0.152667  | 0.345   |
| 0.05      | -0.046667 | 0.3       | 0.335   | 0.146667  | 0.275  | 0.195     | 0.193333  | 0.61    |
| 0.293333  | -0.13     | 0.273333  | 0.23    | 0.046667  | 0.24   | 0.1725    | 0.21      | 0.06    |
| -0.263333 | 0.003333  | -0.106667 | -0.055  | -0.483333 | -0.05  | -0.1425   | -0.15     | -0.22   |
| -0.496667 | -0.213333 | -0.81     | -0.39   | -0.202333 | -0.348 | -0.508333 | -0.455    | -1.05   |
| -0.544667 | -2.645667 | 0.022667  | -0.521  | -0.303333 | -0.455 | -0.21175  | -0.320667 | -1.011  |
| -0.253333 | -0.364    | -0.468333 | 0.12    | -0.066667 | -0.225 | 0.03975   | 0.236     | -0.65   |
| -0.901667 | -2.310667 | -0.51     | -1.219  | -0.503333 | -0.945 | -0.4735   | -0.73     | -0.3845 |
| 0.07      | -0.003333 | 0.136667  | -0.03   | -0.09     | 0.165  | 0.1675    | 0.056667  | 0.12    |
| -0.373333 | -0.08     | -0.046667 | -0.085  | 0.033333  | 0.1    | 0.0775    | 0.095333  | -0.22   |
| -0.25     | -0.063333 | 0.11      | 0.329   | -0.333333 | 0.215  | 0.0525    | -0.003333 | -0.01   |
| -0.093333 | -0.046667 | 0.04      | 0.09    | -0.036667 | -0.06  | 0.0225    | 0.076667  | -0.175  |
| 0.13      | 0.073333  | 0.221667  | -0.06   | 0.28      | -0.095 | 0.18      | 0.441     | -0.025  |
| 0.043333  | 0.03      | 0.273333  | 0.114   | -0.09     | 0.125  | 0.015     | 0.126667  | 0.115   |
| -0.03     | -0.153333 | 0.17      | -0.051  | 0.013333  | 0.17   | 0.16125   | 0.3       | -0.075  |
| 0.14      | 0.093333  | 0.206667  | 0.075   | 0         | 0.175  | 0.08      | 0.07      | 0.27    |
| 0.056667  | -0.12     | 0.313333  | 0.005   | 0.119333  | 0.2    | 0.0825    | 0.028667  | 0.445   |
| -0.116667 | -0.193333 | 0.13      | 0.065   | -0.39     | -0.095 | -0.02     | -0.023333 | -0.195  |
| -0.103333 | -0.216667 | -0.13     | -0.0755 | -0.243333 | 0.005  | -0.03425  | 0.019667  | -0.2    |
| 0.037333  | -0.056333 | 0.268667  | 0.254   | -0.02     | 0.25   | 0.01075   | 0.185333  | 0.1195  |
| 0.036667  | 0.093333  | 0.186667  | 0.215   | 0.246667  | 0.17   | 0.2175    | 0.196667  | 0.12    |

|           |           |           |         |           |         |           |           |        |
|-----------|-----------|-----------|---------|-----------|---------|-----------|-----------|--------|
| 0.013333  | -0.016667 | 0.126667  | 0.2     | -0.043333 | 0.19    | 0.25      | 0.314667  | 0.035  |
| -0.317667 | -0.158667 | 0.049333  | -0.1955 | 0.132     | 0.116   | 0.042     | -0.097    | 0.1385 |
| -0.033333 | 0.143333  | 0.11      | 0.13    | -0.143333 | 0.31    | 0.145     | 0.27      | 0.025  |
| 0.066667  | -0.093333 | 0.246667  | 0.155   | -0.216667 | 0.11    | 0.135     | 0.305     | 0.155  |
| -0.284667 | -0.353333 | -0.158667 | 0.05    | -0.335    | -0.115  | -0.166667 | -0.035    | -0.17  |
| 0.09      | 0.033333  | 0.063333  | 0.08    | 0.04      | 0.4     | 0.1075    | 0.163333  | 0.16   |
| 0.046667  | -0.293333 | 0.176333  | 0.121   | -0.25     | 0.036   | 0.08525   | 0.177     | 0.0685 |
| 0.19      | -0.16     | 0.016667  | 0.14    | 0.033333  | -0.16   | 0.1055    | -0.044    | 0.1    |
| -0.01     | 0.043333  | -0.02     | -0.025  | -0.206667 | -0.13   | -0.17     | -0.083333 | -0.09  |
| 0.02      | 0.1       | 0.256667  | 0.11    | -0.053333 | 0.15    | 0.085     | 0.05      | 0.065  |
| -0.576667 | -0.203333 | -0.46     | -0.1    | -0.196667 | -0.35   | -0.31     | -0.146667 | -0.35  |
| -0.018667 | 0.09      | 0.135     | 0.045   | -0.083333 | 0.102   | 0.02775   | 0.109667  | 0.055  |
| -0.173333 | 0.153333  | -0.216667 | -0.22   | -0.153333 | 0.135   | -0.105    | -0.256667 | 0.12   |
| 0.743333  | 0.836667  | -0.416667 | -3.285  | -1.563333 | -1.01   | -1.1175   | -1.267    | -0.67  |
| 0.18      | -0.24     | 0.086667  | -0.33   | 0.01      | 0.16    | 0.1225    | 0.18      | 0.135  |
| -0.213333 | -0.016667 | 0.143333  | -0.035  | -0.29     | -0.015  | 0.0125    | 0.05      | 0.045  |
| -1.513    | -2.315    | -0.621667 | -2.178  | -1.203333 | -1.4435 | -0.92625  | -1.076333 | -0.678 |
| -1.707333 | 0.293667  | -1.969667 | -1.551  | -0.757333 | -1.133  | -0.279333 | -1.3515   | 0.0245 |
| -1.5      | 0.923333  | -1.971667 | -2.315  | -0.833333 | -1.6    | -1.6555   | -1.911333 | -0.335 |
| -0.13     | -0.076667 | -0.186667 | -0.17   | -0.353333 | -0.26   | -0.243333 | -0.36     | -0.19  |
| -0.123333 | -0.016667 | 0.243333  | 0.374   | 0.083333  | 0.05    | 0.0975    | 0.074     | 0.025  |
| -0.123333 | -0.19     | 0.316667  | 0.33    | 0.18      | 0.12    | 0.1975    | 0.256667  | 0.245  |
| -0.256667 | -0.013333 | 0.276667  | 0.105   | -0.173333 | 0.035   | -0.062    | -0.083333 | 0.1    |
| 0.166333  | 0.043667  | 0.499     | 0.479   | 0.346667  | 0.319   | 0.2305    | 0.459667  | 0.2475 |
| -0.885333 | -0.237333 | -0.781667 | -1.664  | 0.191     | -1.3545 | -0.46475  | -0.459    | -0.568 |
| -1.162333 | -0.441333 | -1.149    | -1.47   | -0.543667 | -0.9655 | -1.134333 | -0.446333 | -0.915 |
| 0.106667  | -0.19     | 0.07      | -0.148  | 0.306667  | 0.065   | 0.1225    | 0.013333  | 0.1    |
| -0.07     | -0.03     | 0.112333  | 0.259   | 0.581     | 0.495   | 0.01125   | -0.08     | 0.345  |
| -0.106667 | -0.176667 | 0.048     | 0.075   | -0.213333 | -0.08   | -0.045    | 0.014     | 0.065  |
| 0.016667  | -0.316667 | -0.673333 | -0.195  | -0.156667 | -0.04   | -0.4875   | -0.316667 | -0.12  |
| -0.046667 | -0.28     | 0.036667  | 0.03    | 0.180667  | -0.17   | 0.16325   | -0.015    | 0.005  |
| -0.33     | -0.313333 | 0.006667  | 0.121   | -0.38     | -0.015  | 0.0575    | 0.075667  | 0.06   |
| -0.18     | -0.32     | 0.148667  | -0.2925 | -0.046667 | 0.225   | 0.463333  | -0.335    | -0.215 |
| 0.003333  | 0.096667  | 0.116667  | 0.055   | -0.273333 | 0.085   | -0.07     | -0.12     | 0.03   |
| -0.15     | 0.003333  | 0.256667  | -0.21   | 0.256667  | 0.4     | 0.12      | 0.136667  | 0.31   |
| -0.367667 | -0.371    | 0.097667  | -0.3705 | 0.11      | -0.15   | 0.048     | -0.003333 | -0.055 |
| -0.17     | 0.206667  | 0.183333  | 0.08    | -0.02     | 0.195   | 0.0575    | 0.14      | -0.08  |
| 0.026667  | -0.11     | 0.08      | 0.095   | -0.04     | -0.235  | -0.03     | -0.156667 | -0.12  |
| -0.196667 | -0.103333 | -0.053333 | -0.1    | -0.044333 | -0.05   | -0.12     | 0.135     | 0.095  |
| 0.066667  | 0.033333  | 0.213333  | 0.15    | 0.013333  | 0.275   | 0.155     | 0.446667  | 0.26   |
| 0.173333  | -0.296667 | 0.35      | 0.015   | 0.31      | 0.265   | 0.3775    | 0.313333  | 0.18   |
| -2.596667 | -2.943333 | -0.007    | -3.04   | -0.403333 | -0.205  | -0.1075   | -0.130333 | 0      |
| -1.582667 | -2.831333 | 0.205667  | -2.2705 | -0.36     | 0.015   | -0.007    | -0.075    | 0.05   |
| -0.192    | -0.3      | -0.626667 | -0.02   | -0.382667 | -0.32   | 0.044667  | -0.7      | -0.38  |
| -0.246667 | -0.253333 | -0.17     | -0.2    | -0.203333 | -0.195  | -0.21     | 0.065     | -0.29  |
| 0.016667  | -0.11     | 0.004     | -0.047  | -0.1      | 0.07    | -0.06075  | -0.134    | 0.18   |
| -0.173333 | -0.016667 | -0.068    | -0.1545 | -0.226667 | -0.11   | -0.216667 | -0.05     | 0.18   |
| 0.046667  | -0.046667 | 0.257667  | 0.03    | 0.053333  | 0.145   | 0.115     | 0.093333  | 0.04   |
| 0.034     | -0.079    | 0.148333  | 0.0755  | -0.009    | -0.01   | 0.17875   | 0.226333  | 0.2    |
| -0.009    | 0.037667  | 0.092     | 0.0915  | -0.033333 | -0.017  | 0.119     | 0.190333  | 0.103  |
| -0.076667 | -0.11     | 0.106667  | 0.007   | 0.026667  | 0.09    | 0.0075    | -0.003333 | 0.14   |
| 0.176667  | -0.16     | 0.053333  | -0.06   | -0.164667 | 0.035   | 0.003333  | 0.017     | 0      |
| -0.056667 | -0.496667 | -0.362333 | 0.2     | 0.323667  | -0.66   | -0.345    | -0.104    | -0.2   |
| -0.226667 | -0.486667 | -0.396667 | -0.995  | -0.196667 | -0.59   | -0.563    | -0.712    | -0.27  |
| -0.006667 | -0.013333 | 0.27      | 0.215   | 0.06      | 0.03    | 0.1       | 0.264     | 0.18   |

|           |           |           |         |           |         |           |           |         |
|-----------|-----------|-----------|---------|-----------|---------|-----------|-----------|---------|
| -0.876667 | -0.016667 | 0.133333  | 0.1     | -0.283333 | 0.145   | 0.0675    | -0.163333 | -0.465  |
| -0.9275   | -0.1395   | -0.268667 | 0.1725  | 0.181333  | -0.6635 | -0.29375  | -0.3865   | -0.9455 |
| -0.116667 | 0.126667  | 0.176667  | 0.16    | -0.07     | 0.095   | 0.095     | 0.11      | -0.01   |
| -0.196667 | -0.286667 | 0.21      | 0.03    | 0.29      | 0.195   | 0.1725    | 0.103333  | -0.015  |
| -0.326667 | -0.236667 | -0.03     | 0.109   | -0.253333 | -0.23   | -0.12     | -0.060667 | -0.09   |
| -0.116667 | 0.043333  | 0.216667  | -0.07   | 0.206667  | 0.035   | -0.095    | 0.056667  | 0.085   |
| -0.18     | 0.056667  | 0.086667  | 0.1     | -0.093333 | -0.005  | -0.0125   | -0.04     | 0.155   |
| 0.096667  | 0.083333  | -0.14     | 0.25    | -0.343333 | 0.015   | 0.024     | 0.101667  | -0.035  |
| -0.18     | -0.436667 | -0.35     | 0.1     | -0.176667 | -0.04   | -0.18     | -0.193333 | 0.17    |
| -0.39     | -0.013333 | -0.213333 | 0.03    | -0.233333 | -0.135  | -0.1075   | -0.060667 | 0.135   |
| -1.693333 | -0.213333 | -0.520333 | 0.13    | -1.278    | -1.135  | 0.09425   | 0.202333  | -0.87   |
| -0.07     | -0.08     | 0.150667  | 0.18    | -0.06     | -0.02   | -0.0775   | 0.017333  | 0.125   |
| -0.015667 | -0.054333 | -0.020667 | 0.24    | 0.431     | 0.3275  | 0.185     | 0.226667  | 0.17    |
| -0.243333 | 0.226667  | -0.06     | -0.035  | 0.133333  | 0.08    | -0.015    | 0.25      | 0.07    |
| -0.126667 | -0.096667 | 0.086667  | -0.105  | 0.203333  | 0.15    | 0.0675    | 0.103333  | 0.075   |
| 0.07      | 0.043333  | 0.157     | 0.291   | 0.366667  | 0.125   | 0.1425    | 0.254     | 0.075   |
| -0.01     | -0.08     | 0.24      | 0.2     | 0.09      | 0.16    | 0.065     | 0.073333  | 0.09    |
| -0.153333 | 0.106667  | 0.235667  | -0.045  | 0.053333  | 0.025   | 0.0775    | 0.089333  | -0.05   |
| -0.905667 | -0.143333 | 0.316667  | -0.336  | 0.461333  | -0.475  | 0.3005    | 0.056667  | -0.57   |
| -0.31     | 0.286667  | 0.072     | -0.475  | -0.49     | -0.12   | -0.13     | -0.09     | -0.17   |
| -0.344    | 0.279333  | -0.033    | -0.42   | -0.266667 | -0.579  | -0.104    | -0.187667 | -0.5415 |
| -0.066667 | 0.053333  | -0.056667 | -0.05   | -0.316667 | -0.2    | -0.11     | -0.063333 | -0.025  |
| 0.26      | -0.01     | 0.216667  | 0.3855  | 0.215     | -0.21   | 0.146667  | 0.275     | 0.21    |
| -0.006667 | -0.266667 | -0.086667 | -0.31   | -0.36     | -0.7    | -0.272    | 0.080333  | -0.585  |
| -0.188    | 0.123333  | 0.137667  | -0.026  | -0.036667 | -0.172  | -0.03275  | 0.181     | -0.104  |
| -0.173333 | -0.173333 | 0.11      | 0.16    | 0.053333  | 0.08    | -0.08     | -0.005667 | 0.175   |
| -0.193333 | -0.313333 | 0.183333  | -0.315  | -0.23     | -0.015  | -0.02     | 0.163333  | 0.15    |
| 0         | 0.143333  | 0.3       | 0.255   | 0.17      | 0.26    | 0.115     | 0.16      | 0.34    |
| -0.23     | -0.176667 | 0.1       | -0.0305 | -0.37     | 0.1     | 0.0775    | 0.046667  | -0.08   |
| 0.313333  | -0.066667 | 0.37      | 0.32    | 0.23      | 0.355   | 0.2225    | 0.446667  | 0.285   |
| -0.406667 | -0.053333 | 0.076667  | -0.13   | 0.21      | -0.115  | 0.065     | 0.03      | 0.095   |
| -0.81     | -0.03     | -0.26     | -1.21   | -0.046667 | -0.575  | -0.44     | -0.283333 | -0.195  |
| 0.026667  | -0.006667 | 0.306667  | 0.03    | 0.113333  | 0.085   | 0.0675    | 0.23      | 0.2     |
| 0.24      | 0.236667  | 0.312333  | 0.295   | 0.14      | 0.075   | 0.1575    | 0.323667  | 0.08    |
| 0.094667  | 0.185     | 0.232     | 0.32    | 0.136667  | 0.0415  | 0.058     | 0.220333  | 0.0995  |
| 0.303333  | 0.036667  | 0.4       | 0.485   | 0.096667  | 0.12    | 0.155     | 0.266667  | 0.31    |
| 0.206667  | 0         | 0.23      | 0.17    | -0.08     | 0.11    | 0.135     | 0.276667  | 0.21    |
| 0.086667  | -0.06     | 0.005333  | 0.185   | -0.02     | 0.2185  | 0.08      | 0.106667  | 0.175   |
| 0.21      | -0.063333 | 0.046667  | 0.09    | -0.41     | -0.02   | 0.2325    | 0.076667  | -0.13   |
| 0.066667  | 0.08      | 0.196667  | 0.085   | 0.01      | 0.05    | 0.0625    | 0.193333  | 0.075   |
| -0.33     | -0.34     | 0.08      | -0.1    | 0.113333  | 0.005   | 0.18      | 0.196667  | -0.12   |
| -0.356667 | -0.17     | -0.19     | -0.07   | -0.15     | -0.28   | -0.046667 | -0.3      | -0.295  |
| -0.093333 | -0.24     | 0.18      | 0.2     | 0.11      | -0.01   | 0.1175    | 0.233667  | 0.055   |
| -0.595333 | -0.22     | -0.110333 | -0.39   | -0.330333 | -0.16   | -0.15225  | -0.136667 | 0.195   |
| -0.073333 | -0.006667 | 0.093333  | 0.17    | 0.143333  | 0.065   | 0.0675    | 0.136667  | 0.23    |
| 0.216667  | 0.133333  | 0.416667  | 0.345   | 0.023333  | 0.345   | 0.235     | 0.413333  | 0.4     |
| 0.266667  | 0.08      | 0.41      | 0.225   | 0.196667  | 0.22    | 0.23      | 0.328333  | 0.36    |
| 0.033333  | -0.046667 | 0.323333  | 0.435   | 0.073333  | -0.08   | 0.18      | 0.436667  | 0.24    |
| 0.173667  | -0.038    | 0.073333  | -0.029  | 0.02      | -0.0075 | 0.0585    | 0.219333  | 0.001   |
| 0.01      | -0.066    | 0.002     | 0.111   | -0.240667 | -0.5955 | -0.114    | 0.004     | -0.14   |
| -0.146667 | -0.183333 | 0.176667  | -0.2095 | 0.013333  | -0.035  | 0.095     | 0.263333  | 0.235   |
| -0.706667 | 0.453333  | -0.12     | -0.705  | -0.806667 | -0.325  | -0.28     | -0.273333 | -0.12   |
| -2.911667 | 0.376667  | -3.234333 | -2.8    | -1.862    | -2.475  | -2.26675  | -2.827667 | -1.41   |
| -2.223333 | 0.671     | -1.869667 | -1.5435 | -1.013333 | -1.6135 | -1.5575   | -2.120333 | -0.82   |
| -0.423333 | -0.27     | -0.6635   | 0.134   | -0.3615   | -0.235  | -0.24     | -0.0945   | -0.877  |

|           |           |           |         |           |         |           |           |         |
|-----------|-----------|-----------|---------|-----------|---------|-----------|-----------|---------|
| 0.15      | 0.03      | -0.02     | 0.185   | -0.163333 | 0.025   | 0.0325    | 0.07      | -0.14   |
| -0.231333 | -0.075333 | -0.418    | 0.133   | 0.053333  | -0.212  | -0.3595   | -0.427    | -0.152  |
| 0.226667  | 0.266667  | 0.3       | 0.415   | 0.23      | 0.385   | 0.355     | 0.268333  | 0.195   |
| 0.216667  | 0.226667  | 0.23      | 0.21    | 0.253333  | 0.33    | 0.3875    | 0.496667  | 0.275   |
| -0.16     | -0.09     | -0.233333 | -0.04   | -0.093333 | -0.025  | -0.015    | -0.100667 | 0.04    |
| 0.063333  | -0.046667 | 0.223333  | 0.115   | 0.176667  | 0.055   | 0.3775    | 0.313333  | 0.155   |
| 0.033333  | 0.043333  | 0.123333  | 0.005   | -0.076667 | 0.03    | 0.0125    | -0.123333 | 0.045   |
| -0.16     | -0.136667 | -0.183333 | -0.135  | -0.253333 | -0.23   | -0.075    | -0.093333 | -0.24   |
| 0.176667  | 0.173333  | 0.016667  | 0.499   | 0.495     | 0.15    | 0.106667  | 0.42      | 0.365   |
| 0.2       | -0.103333 | 0.38      | 0.185   | 0.09      | 0.12    | 0.195     | 0.416667  | 0.16    |
| -0.211333 | -0.205333 | -0.121    | -0.0695 | -0.565667 | -0.215  | -0.2885   | -0.301    | -0.17   |
| -0.059    | 0.02      | 0.306667  | 0.2365  | 0.153333  | 0.125   | 0.0775    | 0.251333  | 0.11    |
| -0.453333 | -0.198333 | -0.137333 | 0.153   | -0.122333 | -0.08   | 0.133333  | 0.08      | -0.085  |
| 0.02      | -0.086667 | -0.006667 | 0.03    | -0.123333 | 0.085   | -0.04     | -0.165    | 0.07    |
| -0.013333 | 0.03      | 0.116667  | 0.18    | 0.163333  | 0.15    | 0.175     | 0.243333  | 0.295   |
| -0.09     | -0.206667 | 0.063333  | 0.07    | -0.133333 | 0.215   | -0.15     | -0.06     | 0.125   |
| -0.26     | -0.329333 | -0.384667 | -0.04   | -0.797333 | -0.455  | -0.25975  | -0.215    | -0.26   |
| 0.153333  | -0.013333 | -0.04     | 0.24    | -0.21     | 0.175   | 0.0075    | -0.056667 | 0.135   |
| 0.036333  | 0.108667  | 0.055     | -0.0285 | -0.062667 | -0.033  | 0.00775   | 0.074     | 0.0365  |
| 0.068667  | -0.054    | 0.182333  | 0.228   | -0.146667 | 0.11    | 0.104     | 0.209     | 0.2195  |
| 0.206667  | -0.143333 | 0.193333  | 0.145   | -0.096667 | 0.035   | 0.06475   | 0.112     | 0.09    |
| -0.399667 | 0.063333  | -0.574667 | -0.105  | -0.393667 | -0.59   | -0.286667 | -0.565    | -0.145  |
| 0.303667  | 0.1735    | 0.451     | 0.656   | 0.447333  | -0.1865 | 0.20475   | 0.437     | 0.5195  |
| -0.873333 | -1.666667 | -0.426667 | -1.48   | -0.156667 | -1.555  | -0.325    | -0.156667 | -0.65   |
| -0.37     | -0.24     | 0.183333  | 0.14    | -0.249667 | -0.085  | -0.015    | 0.035667  | 0.06    |
| -0.036667 | -0.07     | 0.06      | -0.131  | -0.51     | -0.115  | 0.105     | 0.093333  | 0.145   |
| -0.053333 | -0.01     | -9.25E-18 | 0.2     | 0.2       | 0.03    | -0.0475   | 0.094333  | 0.18    |
| 0.17      | -0.033333 | 0.406667  | 0.22    | 0.28      | 0.19    | 0.1475    | 0.411     | 0.39    |
| 0.043333  | 0.006667  | -0.16     | 0.045   | -0.293333 | -0.095  | -0.0275   | -0.08     | -0.035  |
| 0.063333  | -0.056667 | 0.17      | 0.1105  | 0.266667  | 0.08    | 0.1775    | 0.329333  | -0.055  |
| 0.03      | 0.17      | 0.38      | 0.22    | 0.08      | 0.155   | 0.125     | 0.066667  | 0.235   |
| -0.07     | -0.04     | -0.02     | -0.0205 | -0.196667 | 0.045   | -0.085    | 0.116667  | 0.12    |
| -0.196667 | -0.02     | 0.073333  | 0.1355  | -0.25     | 0.14    | -0.02     | -0.015    | 0.07    |
| -0.01     | -0.24     | -0.06     | -0.075  | -0.22     | -0.12   | 0.36225   | 0.043333  | -0.13   |
| -0.493333 | -0.117    | -0.073    | -0.18   | 0.6       | 0.074   | -0.163333 | -0.32     | -0.365  |
| -0.215    | -0.342    | -0.033333 | 0.02    | -0.503333 | -0.0605 | -0.04075  | 0.088667  | -0.0245 |
| 0.003333  | -0.093333 | -0.096667 | -0.15   | -0.33     | -0.09   | -0.1225   | -0.083333 | -0.375  |
| -0.056667 | -0.003333 | 0.05      | -0.035  | -0.44     | -0.14   | -0.0725   | -0.043333 | -0.11   |
| -0.145333 | -0.119667 | -0.162667 | 0.054   | -0.166667 | 0.2355  | -0.062    | -0.123    | 0.0475  |
| -0.236667 | -0.193333 | -0.09     | -0.12   | -0.24     | 0.125   | -0.09     | -0.093333 | -0.265  |
| -0.056667 | 0.116667  | 0.04      | -0.02   | 0.21      | 0.17    | 0.0395    | 0.189667  | -0.17   |
| 0.106667  | -0.353333 | 0.043333  | 0.1415  | -0.136667 | 0.055   | 0.1025    | -0.003333 | -0.015  |
| -0.16     | -0.1      | -0.14     | 0.467   | -0.566667 | -0.06   | -0.17475  | -0.116667 | -0.17   |
| 0.1       | -0.01     | 0.143333  | -0.04   | -0.213333 | -0.08   | -0.025    | 0.073333  | -0.055  |
| -0.203333 | 0.003333  | -0.15     | -0.135  | -0.456667 | -0.07   | -0.18     | -0.126667 | -0.285  |
| -0.006667 | -0.003333 | 0.123333  | 0.0785  | -0.076667 | -0.015  | 0.14      | 0.28      | 0.07    |
| 0.093333  | 0.07      | 0.096667  | 0.005   | -0.123333 | -0.1885 | -0.0975   | 0.046667  | 0.02    |
| 0.05      | -0.063333 | 0.123333  | 0.05    | 0.13      | -0.085  | -0.0425   | 0.113333  | -0.0175 |
| -2.066    | -3.514    | -2.113    | 0.597   | -1.536667 | -2.159  | -1.82175  | -2.056667 | -0.992  |
| -1.876667 | -2.596667 | -2.26     | 0.515   | -1.93     | -1.755  | -1.77     | -2.09     | -1.265  |
| 0.003333  | -0.166667 | 0.116667  | 0.165   | 9.25E-18  | 0.065   | -0.021    | 0.223333  | 0.115   |
| -0.33     | -0.293333 | -0.11     | 0.165   | -0.15     | -0.235  | -0.1375   | -0.006667 | -0.195  |
| -0.173333 | 0.14      | 0.006667  | 0.225   | -0.11     | -0.05   | -0.165    | -0.106667 | -0.19   |
| -0.196667 | -0.036667 | -0.04     | 0.175   | -0.406667 | -0.03   | -0.25     | -0.187667 | -0.095  |
| -0.016667 | -0.1      | 0.056667  | 0.28    | 0.09      | 0.115   | 0.18025   | 0.13      | 0.045   |

|           |           |           |         |           |         |           |           |         |
|-----------|-----------|-----------|---------|-----------|---------|-----------|-----------|---------|
| -0.076667 | -0.087333 | -0.134667 | 0.078   | -0.363667 | 0.015   | -0.04625  | -0.131667 | -0.03   |
| 0.026667  | -0.04     | 0.246667  | 0.28    | 0.163333  | -0.04   | 0.125     | 0.223333  | 0.155   |
| -0.363333 | -0.34     | -0.036667 | 0.03    | -0.1385   | -0.02   | 0.006667  | -0.5135   | -0.08   |
| -0.236667 | -0.443333 | 0.033333  | 0.08    | -0.453667 | -0.06   | -0.1555   | -0.011    | 0.03    |
| 0.049667  | -0.203    | 0.121667  | -0.0045 | -0.083333 | 0.045   | 0.02025   | 0.057     | 0.112   |
| -0.216667 | -0.096333 | -0.173333 | 0.16    | -0.133333 | -0.24   | -0.16875  | -0.119333 | -0.18   |
| 0.193333  | -0.036667 | 0.181333  | 0.15    | -0.096667 | 0.125   | 0.0675    | 0.143333  | 0.205   |
| 0.063333  | -0.016333 | 0.29      | 0.1865  | 0.036667  | 0.26    | 0.3225    | 0.576667  | 0.26    |
| 0.05      | -0.38     | 0.26      | 0.115   | 0.226667  | 0.205   | 0.0525    | 0.306667  | 0.116   |
| -0.093333 | -0.14     | 0.123333  | 0.0125  | 0.23      | 0.025   | -0.0175   | 0.233667  | 0.09    |
| -0.036667 | -0.046667 | -0.016667 | -0.085  | -0.293333 | -0.16   | 0.0025    | 0.066667  | 0.085   |
| -0.036667 | -0.08     | 0.14      | -0.15   | -0.126667 | -0.14   | 0.03      | 0.026667  | -0.205  |
| -0.055    | 0.077333  | -0.133    | 0.03    | 0.236333  | -0.0135 | 0.233     | 0.099667  | 0.1025  |
| 0.12      | 0.026667  | 0.2       | 0.165   | -0.106667 | 0.08    | 0.0875    | 0.14      | 0.205   |
| 0.246667  | -0.016667 | -0.03     | 0.055   | -0.173333 | 0.18    | 0.1025    | 0.241     | 0.205   |
| -0.343333 | -0.170667 | -0.023333 | -0.28   | 0.165333  | -0.168  | -0.059    | 0.114333  | -0.056  |
| 0.175667  | -0.0215   | -0.475667 | 0.08    | 0.4435    | -0.159  | -0.334667 | -0.18     | -0.0105 |
| 0.006667  | -0.04     | 0.466667  | 0.2     | -0.077    | 0.185   | 0.47      | 0.438333  | 0.32    |
| 0         | 0.12      | 0.183333  | 0.335   | 0.306667  | 0.155   | 0.2125    | 0.213333  | 0.355   |
| 0.18      | 0.223333  | 0.366667  | 0.23    | 0.21      | 0.25    | 0.1725    | 0.313333  | 0.455   |
| -0.026667 | -0.07     | 0.166667  | -0.3855 | -0.26     | 0.365   | -0.0725   | -0.043333 | 0.15    |
| 0.04      | -0.05     | 0.12      | 0.08    | -0.236667 | 0.01    | 0.01      | 0.01      | -0.105  |
| 0.046667  | 0.166667  | -0.346333 | 0.095   | -0.286667 | -0.145  | -0.2025   | -0.1      | 0.09    |
| 0         | 0.126667  | 0.18      | 0.2065  | 0.133333  | -0.065  | 0.12375   | -0.648    | 0.16    |
| -0.11     | -0.026667 | -0.112333 | 0.16    | -0.276667 | -0.0635 | 0.025     | 0.07      | -0.085  |
| -0.167    | -0.04     | -0.003667 | 0       | 0.108     | -0.1615 | -0.25375  | -0.025667 | 0.0315  |
| -1.656667 | -0.6      | -0.753333 | -2.305  | -1.263333 | -1.67   | -1.205    | -1.603333 | -0.76   |
| -0.65     | 0.013333  | -0.862667 | -0.74   | -0.134667 | -1.23   | -0.47     | -0.53     | -0.415  |
| 0.073333  | 0.253333  | 0.2       | 0.17    | -0.143333 | 0.085   | 0.075     | -0.04     | 0.025   |
| 0.267667  | -0.081    | 0.103667  | 0.0605  | 0.433333  | 0.227   | 0.20025   | 0.235667  | 0.25    |
| 0.033333  | 0.276667  | 0.193333  | -0.185  | -0.42     | -0.055  | 0.235     | 0.290333  | -0.07   |
| -0.346667 | -0.21     | -0.263333 | -0.4    | -0.353333 | -0.48   | -0.32     | 0.050667  | -0.087  |
| -0.538667 | -0.91     | -0.177667 | -0.278  | -0.8355   | -0.579  | -0.360667 | -0.1535   | -0.305  |
| 0.835333  | 1.011333  | -2.805333 | -1.78   | -1.163333 | -5.342  | -1.9      | -1.640667 | -1.0795 |
| 0.913333  | 0.983333  | -1.513333 | -1.865  | -1.25     | -1.205  | -1.4525   | -1.283333 | -0.83   |
| -0.336667 | -0.276667 | -0.296667 | -0.12   | 0.1835    | -1.725  | -0.236667 | -0.13     | -0.435  |
| 0.056667  | 0.12      | 0.166667  | 0.115   | -0.19     | 0.07    | -0.0075   | 0.083333  | 0.09    |
| 0.321667  | 0.239333  | 0.106667  | 0.343   | 0.3       | 0.0955  | 0.08125   | 0.267667  | 0.3165  |
| -0.056667 | -0.053333 | 0.283333  | -0.04   | -0.18     | -0.09   | -0.0425   | 0.093     | 0.175   |
| -0.03     | 0.13      | 0.336667  | 0.45    | 0.443333  | 0.215   | 0.22      | 0.26      | 0.2     |
| 0.04      | -0.103333 | 0.053333  | 0.355   | 0.26      | 0.305   | 0.1475    | 0.266667  | 0.02    |
| -0.113333 | 0.043333  | 0.373333  | 0.13    | 0.036667  | 0.075   | 0.02      | 0.083333  | -0.005  |
| -0.163333 | -0.283333 | -0.263333 | 0.156   | -0.106667 | 0.01    | -0.185    | -0.116667 | 0.025   |
| -0.002    | -0.128    | -0.064667 | -0.001  | 0.093333  | 0.1295  | 0.10925   | 0.152333  | 0.1325  |
| -0.14     | -0.286667 | -0.003333 | -0.2    | -0.33     | -0.205  | -0.065    | -0.004    | -0.15   |
| -0.1      | 0.039333  | 0.106667  | 0.13    | -0.006667 | 0.115   | 0.1125    | 0.146667  | 0.135   |
| -0.098667 | -0.093333 | 0.043333  | 0.125   | 0.296667  | 0.11    | 0.255     | 0.18      | -0.04   |
| 0.03      | -0.323333 | 0.156667  | 0.19    | 0.223333  | 0.385   | 0.4125    | 0.48      | 0.22    |
| 0.14      | 0.003333  | 0.327333  | 0.165   | -0.116667 | 0.11    | 0.1075    | 0.076667  | 0.11    |
| 0.380667  | 0.335     | 0.132333  | -0.0745 | -0.033333 | -0.16   | -0.06175  | 0.123667  | 0.043   |
| 0.173333  | 0.053333  | -0.08     | 0.305   | -0.363333 | -0.085  | -0.005    | 0.15      | 0.11    |
| 0.126667  | 0.15      | -0.033333 | -0.215  | -0.24     | -0.265  | -0.353333 | 0.035     | -0.025  |
| 0.2       | 0.02      | 0.15      | 0.28    | -0.366667 | -0.069  | -0.055    | 0.084333  | -0.005  |
| -0.036667 | -0.063333 | 0.216667  | 0.307   | 0.016667  | -0.09   | 0.015     | 0.183667  | 0.125   |
| -0.006667 | 0.036667  | 0.34      | 0.1     | -0.13     | 0.015   | 0.10325   | 0.24      | 0.22    |

|           |           |           |         |           |         |           |           |         |
|-----------|-----------|-----------|---------|-----------|---------|-----------|-----------|---------|
| 0.162333  | 0.024333  | 0.274667  | 0.05    | 0.013333  | 0.162   | 0.15775   | 0.285     | 0.258   |
| -0.16     | 0.066667  | -0.156    | 0.43    | 0.705     | 0.08    | 0.438667  | 0.06      | 0.138   |
| -0.106    | -0.115    | 0.143     | 0.058   | -0.060333 | -0.1505 | -0.07275  | 0.009667  | 0.024   |
| -1.751667 | -4.8475   | -1.614333 | -2.802  | -1.424    | -1.9485 | -1.44     | -1.604667 | -0.136  |
| -1.695    | -1.696667 | -2.896667 | -1.368  | -0.338    | -2.355  | -1.562    | -0.6      | -1.14   |
| 0.143667  | 0.474     | -1.055333 | 0.115   | 0.331667  | -0.059  | -0.6785   | -1.083    | -0.805  |
| 0.827     | -0.135    | -2.2415   |         | -0.053667 | -1.94   | 0.0495    | -1.62     | -0.88   |
| -0.349333 | 0.04      | -0.697333 | -1.33   | -0.07     | -2.2645 | -0.02     | -0.88     | -1.215  |
| 0.11      | 0.01      | 0.24      | 0.195   | 0.056667  | 0.13    | 0.23875   | 0.26      | 0.035   |
| -0.11     | -0.09     | 0.006667  | 0.09    | 0.106667  | -0.11   | -0.0375   | 0.056667  | -0.02   |
| 0.02      | -0.026667 | 0.2       | 0.29    | -0.16     | -0.055  | -0.1175   | 0.113333  | -0.09   |
| 0.115333  | 0.012333  | 0.307667  | 0.0655  | -0.246667 | 0.119   | 0.10925   | 0.23      | 0.2575  |
| -0.323333 | 0.026     | -0.025667 | -0.22   | -0.300667 | -0.295  | -0.08825  | -0.087333 | -0.245  |
| -0.178333 | -3.118667 | -0.966333 | -2.106  | -1.456667 | -2.2215 | -0.94375  | -0.648    | -0.9345 |
| 0.113333  | 0.02      | 0.733333  | 0.355   | 0.11      | 0.08    | 0.0625    | 0.230333  | 0       |
| 0         | 0.073333  | 0.35      | 0.345   | 0.016667  | 0.095   | 0.1375    | 0.32      | -0.01   |
| -0.04     | -0.053333 | 0.15      | 0.14    | -0.35     | -0.1    | -0.1425   | 0.14      | -0.215  |
| -0.113667 | 0.15      | 0.274333  | 0.2625  | -0.176667 | -0.142  | 0.01      | 0.201667  | -0.0865 |
| -0.346667 | -0.373333 | -1.423333 | -0.173  | -0.08     | -1.042  | -1.07     | -1.433333 | -1.135  |
| -0.742667 | -1.061667 | -1.709333 | -0.28   | 0.193333  | -1.575  | -0.992    | -1.586    | -0.695  |
| -0.506667 | 0.223333  | -0.923333 | -0.0925 | -0.086667 | 0.12    | -0.1595   | -0.237667 | -0.28   |
| 0.076667  | 0.22      | 0.09      | -0.05   | 0.063333  | 0.355   | 0.116667  | 0.08      | 0.415   |
| -0.283333 | 0.103333  | -0.28     | -0.08   | 0.186667  | -0.29   | -0.3075   | -0.61     | -0.02   |
| -1.6      | -1.676667 | -0.368    | 1.24    | -0.255333 | -1.64   | -0.9325   | -1.705    | -0.915  |
| -2.32     | -0.556667 | -2.243333 | -2.56   | -1.876667 | -1.97   | -1.3      | -0.53     | -1.185  |
| -2.533333 | -0.33     | -2.276333 | -2.92   | -1.808667 | -2.415  | -2.083333 | -0.691667 | -1.42   |
| -1.856667 | -1.902667 | -0.563333 | 0.68    | 0.469667  | -1.91   | -1.10675  | -1.276333 | -1.205  |
| -1.624    | -2.18     | -1.028    | -2.0175 | -1.545333 | -1.62   | -1.418667 | -1.0745   | -1.305  |
| -1.193333 | -1.563333 | -0.833333 | -0.75   | -0.975    | -1.125  | -0.91     | -1.253667 | -0.9    |
| -0.455    | -2.203333 | -0.25     | 0.1     | 0.09      | -0.402  | -0.833333 | -2.795    | -1.709  |
| -0.103333 | 0.133333  | 0.153333  | 0.03    | 0.07      | -0.005  | -0.0875   | -0.01     | -0.01   |
| -0.43     | -0.196667 | -0.276667 | -0.02   | -0.586667 | 0.045   | -0.08     | -0.029667 | -0.045  |
| -0.198667 | 0.035667  | 0.139667  | 0.3045  | -0.333333 | -0.0085 | -0.075    | 0.033667  | 0.2235  |
| -0.14     | -0.05     | -0.555333 |         | -0.346    | -1.41   | -0.32525  | -0.182667 | -0.365  |
| -0.145    | -0.135333 | -0.404667 | -0.03   | -0.0735   | -0.692  | -0.473667 | -0.057    | -0.1315 |
| -1.08     | 0.073333  | -0.483333 | -1.27   | -1.026667 | -1.06   | -0.4675   | -0.28     | 0.04    |
| -1.932    | 0.143667  | -1.056667 | -2.6055 | -1.753    | -2.066  | -1.021    | -0.714333 | 0.239   |
| -1.263333 | -0.127    | -0.712667 | -2.2445 | -1.513333 | -1.575  | -0.7565   | -0.352667 | -0.1    |
| -0.103333 | -0.173333 | -0.057    | 0.09    | -0.06     | 0.12    | 0.09975   | 0.198333  | 0.39    |
| -0.075667 | 0.114     | -0.252667 | 0.06    | 0.04      | -0.072  | -0.07525  | -0.043667 | 0.428   |
| 0.056667  | 0.036667  | 0.27      | 0.14    | -0.19     | -0.025  | 0.1525    | 0.153333  | 0.115   |
| 0.161333  | -0.142    | 0.153333  | 0.2005  | 0.116667  | -0.033  | 0.197     | 0.182     | 0.2865  |
| 0.236667  | 0.023333  | 0.08      | 0.175   | 0.213333  | 0       | 0.0225    | 0.2       | 0.035   |
| 0.006667  | -0.016667 | 0.336667  | -0.133  | 0.253333  | 0.18    | 0.21      | 0.275333  | 0.14    |
| 0.156667  | -0.003333 | 0.25      | 0.065   | 0.203333  | 0.045   | 0.015     | 0.213333  | 0.115   |
| -0.013333 | -0.033333 | 0.003333  | -0.064  | -0.066667 | 0.095   | -0.075    | -0.27     | 0.13    |
| -0.223333 | 0.226667  | 0.133333  | 0.1     | 0.083333  | -0.03   | -0.0125   | 0.104333  | 0.305   |
| -0.76     | -0.61     | -0.313    | -0.465  | 0.104     | -1.3635 | -0.73625  | -0.5515   | -0.804  |
| -0.003333 | -0.106667 | -0.083333 | -0.3    | -0.594333 | -0.315  | -0.03825  | -0.250667 | -0.13   |
| 0.05      | 0.016667  | 0.216667  | 0.081   | 0.05      | -0.555  | 0.005     | 0.03      | 0.055   |
| -0.043333 | -0.293333 | -0.043333 | -0.042  | -0.366667 | 0.02    | -0.1375   | -0.116667 | 0.015   |
| 0.158333  | 0.112     | 0.149667  | 0.0745  | 0.203333  | 0.1925  | 0.044     | 0.091333  | 0.1565  |
| -0.08     | -0.016667 | 0.076667  | 0.0685  | -0.06     | -0.11   | 0.095     | 0.248333  | 0.025   |
| 0.05      | 0.213333  | 0.223333  | 0.28    | 0.23      | 0.27    | 0.1525    | 0.204     | 0.32    |
| -0.063333 | -0.196667 | 0.01      | -0.0735 | -0.464333 | -0.015  | 0.19175   | 0.033     | 0.135   |

|           |           |           |         |           |         |           |           |         |
|-----------|-----------|-----------|---------|-----------|---------|-----------|-----------|---------|
| 0.056667  | -0.043333 | 0.07      | 0.175   | -0.166667 | -0.125  | -0.0525   | 0.016667  | 0.095   |
| -0.027    | 0.111667  | 0.144333  | 0.286   | -0.316    | -0.0095 | -0.0315   | -0.048    | -0.009  |
| 0.103333  | 0.013333  | -0.006667 | 0.055   | -0.2      | 0.03    | -0.015    | 0.136667  | 0.065   |
| -0.153333 | -0.296667 | 0.09      | 0.065   | -0.123333 | 0.085   | 0.0225    | 0.093333  | 0.02    |
| 0.076667  | 0.13      | 0.25      | 0.3     | 0.02      | -0.02   | 0.1475    | 0.218667  | 0.155   |
| -0.085667 | 0.054667  | 0.134667  | -0.0735 | -0.349667 | 0.013   | -0.13     | 0.208333  | 0.1075  |
| -0.26     | -0.076667 | -0.133333 | -0.375  | -0.42     | -0.18   | -0.2775   | -0.203333 | 0.075   |
| -0.276667 | -0.266667 | -0.103667 | 0.17    | 0.002     | -0.195  | 0.014     | 0.173333  | -0.135  |
| -0.11     | -0.246667 | 0.11      | -0.1115 | -0.12     | -0.2    | -0.04     | -0.043667 | -0.155  |
| -0.12     | 0.193333  | -0.03     | -0.146  | -0.036667 | -0.28   | -0.2075   | -0.09     | -0.115  |
| -0.17     | 0.06      | 0.156667  | 0.105   | -0.056667 | 0.085   | 0.005     | 0.12      | -0.145  |
| 0.166667  | 0.05      | 0.203333  | 0.095   | 4.63E-18  | -0.06   | 0.005     | 0.086667  | 0.115   |
| -0.556667 | 0.273333  | -0.366667 | -0.245  | -0.173333 | -0.11   | -0.1225   | -0.180667 | -0.25   |
| -0.737667 | -0.46     | -0.552    | -0.206  | -0.756    | -0.615  | -0.33     | -0.48     | -0.415  |
| 0.076667  | 0.046667  | 0.18      | 0       | -0.123333 | 0.165   | -0.06     | 0.186667  | 0.145   |
| 0.14      | 0.1       | 0.143333  | 0.12    | -0.28     | 0.08    | 0.0875    | 0.156667  | 0.165   |
| -0.316667 | -0.11     | -0.2      | 0.07    | 0.15      | 0.055   | 0.015     | -0.056667 | -0.165  |
| 0.02      | 0.206667  | 0.506667  | 0.295   | 0.096667  | 0.17    | 0.183     | 0.32      | 0.245   |
| -0.133333 | -0.153333 | -0.003333 | 0.21    | -0.146667 | 0.19    | -0.02025  | 0.09      | 0.06    |
| -0.2      | 0.006667  | -0.116667 | -0.02   | -0.153333 | 0       | -0.0125   | 0.096667  | -0.03   |
| -1.596667 | 0.456667  | -2.15     | -1.32   | -1.672    | -2.075  | -1.49575  | -1.78     | 0.28    |
| 0.087667  | 0.106667  | 0.136667  | 0.015   | 0.156667  | 0.29    | 0.0275    | 0.21      | 0.05    |
| -0.02     | -0.09     | -0.126667 | 0.14    | -0.4      | -0.095  | -0.31175  | -0.133333 | -0.255  |
| 0.026667  | -0.046667 | 0.23      | 0.3385  | 0.066667  | 0.17    | 0.2225    | 0.258333  | -0.12   |
| -0.09     | -0.013333 | 0.47      | 0.49    | 0.270667  | 0.165   | 0.426667  | 0.504333  | 0.285   |
| -0.186667 | -0.09     | 0.176667  | -0.225  | -0.08     | -0.1    | 0.27375   | 0.390667  | -0.005  |
| 0.11      | -0.043333 | 0.19      | 0.11    | -0.076667 | -0.045  | 0.22      | 0.08      | 0.04    |
| -0.353333 | -0.02     | 0.26      | 0.205   | -0.183333 | -0.2    | 0.1875    | 0.226667  | -0.09   |
| -0.023333 | 0.126667  | 0.36      | 0.268   | 0.226667  | -0.014  | 0.2825    | 0.216667  | -0.095  |
| -0.031333 | -0.107    | 0.003667  | -0.1    | -0.256667 | 0.126   | 0.079     | 0.058     | 0.0105  |
| 0.156667  | 0.036667  | 0.443333  | 0.27    | -0.103333 | 0.09    | 0.475     | 0.446667  | 0.095   |
| -0.09     | 0.013333  | 0.373333  | 0.215   | -0.073333 | -0.035  | 0.438     | 0.44      | 0.12    |
| -0.053333 | -0.17     | 0.186667  | -0.02   | -0.25     | -0.05   | 0.3       | 0.026667  | -0.06   |
| 0.143333  | 0.02      | 0.39      | 0.21    | 0.013333  | 0.27    | 0.3675    | 0.33      | 0.13    |
| 0.243333  | -0.1      | 0.463333  | 0.13    | 0.18      | 0.25    | 0.4175    | 0.403333  | 0.11    |
| 0.163333  | 0.003333  | 0.396667  | -0.135  | -0.103333 | -0.005  | 0.4       | 0.18      | 0.075   |
| -0.06     | -0.196667 | 0.476667  | 0.145   | -0.233333 | 0.135   | 0.3       | 0.35      | 0.115   |
| -2.393    | 0.334333  | -2.486333 | -3.0705 | -2.636667 | -1.456  | -1.5855   | -1.866    | -1.465  |
| -2.393333 | -2.916667 | -2.271667 | -2.79   | -1.806667 | -1.605  | -1.3575   | -1.783667 | -1.295  |
| -1.88     | 0.153333  | -0.066667 | -0.28   | -1.21     | -0.24   | -0.1875   | -0.117333 | -0.72   |
| -2.036667 | 0.256667  | -0.813333 | -1.305  | -1.263333 | -0.96   | -0.49     | -0.28     | -1.02   |
| -2.088    | 0.255333  | -0.204333 | 0.267   | -0.910667 | -0.141  | -0.35675  | -0.098333 | -1.2605 |
| -0.507333 | -0.043333 | -0.225333 | -0.244  | -0.690333 | -0.025  | -0.35     | -0.363    | -0.53   |
| -1.333333 | 0.293333  | -0.680333 | -0.84   | -1.208    | 0.593   | -0.883333 | 0.315     | 0.2305  |
| 0.0595    | -0.648333 | -1.353333 | -0.027  | -0.269    | -0.585  | -0.45775  | -1.22     | -1.03   |
| -0.123333 | -0.003333 | 0.126667  | 0.12    | 0.043333  | 0.02    | 0.0125    | 0.085667  | 0.01    |
| -0.336667 | -0.16     | -0.003333 | -0.145  | -0.133333 | -0.115  | -0.2525   | -0.068    | -0.06   |
| 0.36      | 0.17      | 0.266667  | 0.22    | 0.223333  | 0.14    | 0.3375    | 0.396667  | 0.14    |
| -0.126667 | -0.186667 | -0.316667 | 0.289   | -0.11     | -0.255  | -0.055    | -0.173667 | -0.065  |
| 0.16      | 0.33      | 0.183333  | 0.275   | -0.016667 | 0.14    | 0.1925    | 0.103333  | 0.36    |
| 0.213333  | 0.03      | 0.2       | 0.305   | -0.023333 | 0.275   | 0.0575    | 0.186667  | 0.145   |
| 0.173333  | 0.183333  | -0.056667 | -0.22   | -0.371    | 0.04    | -0.1425   | -0.31     | -0.145  |
| 0.093333  | -0.016667 | 0.216667  | 0.28    | 0.046667  | 0.225   | 0.0975    | 0.134     | 0.175   |
| -0.013333 | 0.103333  | 0.22      | 0.165   | 0.077     | 0.165   | 0.10625   | 0.2       | 0.24    |
| -0.29     | -0.05     | 0.07      | 0.18    | 0.083333  | 0.19    | 0.2175    | 0.25      | -0.085  |



|           |           |           |         |           |         |           |           |         |
|-----------|-----------|-----------|---------|-----------|---------|-----------|-----------|---------|
| 0.073333  | 0.206667  | -0.02     | 0.05    | -0.016667 | 0.01    | 0.0225    | 0.17      | 0.165   |
| -1.826    | -3.083333 | -1.344667 | -2.834  | -1.937    | -1.805  | -1.466    | -1.737333 | -1.145  |
| -1.073333 | -0.123333 | -0.533333 | 0.27    | 0.51      | -0.105  | 0.036667  | -0.37     | -0.405  |
| -0.216667 | 0.27      | -0.138333 | 0.2     | 0.31      | 0.475   | 0.26725   | -0.165    | -0.177  |
| -1.573333 | 0.926667  | -0.886667 | 1.2445  | 1.003333  | 1.06    | -0.0425   | -0.51     | -0.99   |
| -0.24     | -0.166667 | 0.123333  | 0.2     | -0.05     | -0.01   | 0         | -0.076667 | -0.235  |
| -2.665    | -4.015333 | -0.115    | -2.06   | -2.172333 | -2.763  | -1.36925  | -1.975    | -1.925  |
| -3.173333 | -4.466667 | 0.23      | 0.02    | -3.03     | -3.085  | -1.645    | -1.188667 | -1.99   |
| -2.819667 | -4.2135   | -1.517    | -0.0465 | -2.569    | -2.86   | -1.82875  | -1.118333 | -1.6    |
| -3.51     | -4.699333 | -2.51     | -0.145  | -2.496667 | -3.19   | -2.6275   | -1.82     | -1.845  |
| -3.346    | -3.7      | -4.946    | 0.35    | -1.05     | -3.874  | -2.219    | -1.282    | -1.781  |
| -3.543333 | -5.185333 | -3.438667 | 0.0075  | -2.506667 | -3.17   | -2.285    | -1.29     | -1.7    |
| -2.735333 | -3.437667 | -3.297    | -0.082  | -2.74     | -2.67   | -1.57275  | -0.923667 | -1.545  |
| -3.44     | -3.407    | -4.711    | 0.21    | -2.883333 | -3.5    | -2.4325   | -1.464667 | -2.18   |
| -2.96     | -3.132    | -3.507    | -0.059  | -3.393333 | -2.76   | -2.275    | -1.013    | -1.255  |
| -2.772333 | -3.839    | -3.366667 | -2.2715 | -1.832    | -3.62   | -2.21075  | -1.335    | -1.825  |
| -3.791    | -6.4915   | -3.422    | -2.346  | -3.311333 | -3.568  | -2.652    | -1.385667 | -1.422  |
| -4.445    | -3.968    | -5.191667 | -0.2955 | -3.893333 | -3.455  | -2.6885   | -0.36     | -0.37   |
| -3.12     | -3.925    | -3.963333 | 0.235   | -3.246667 | -3.44   | -1.9825   | -1.256667 | 0.005   |
| -3.983333 | -2.52     | -3.2885   | -0.925  | -3.026667 | -3.57   | -2.6725   | -2.398333 | -0.785  |
| -3.883333 | -3.533333 | -3.434    | -2.765  | -1.786667 | -3.825  | -2.755    | -2.706667 | -1.1    |
| -3.784667 | -3.695    | -4.299667 | -3.559  | -3.233333 | -3.395  | -3.505    | -3.556    | -0.31   |
| -3.433333 | -3.713    | -4.890667 | -4.185  | -4.034667 | -4.25   | -3.405    | -3.512    | 0.28    |
| -3.876667 | -4.2      | -3.081    | -3.8    | -3.233333 | -3.14   | -3.5075   | -3.631    | 0.23    |
| -3.606667 | -3.293333 | -0.4      | -3.595  | -2.973333 | -2.56   | -2.852    | -3.447333 | -0.355  |
| -3.317333 | -3.871333 | -1.675667 | -3.726  | -3.406667 | -3.516  | -3.068    | -3.378667 | -0.39   |
| -3.11     | -3.146667 | -2.066667 | -3.51   | -2.815667 | -2.995  | -2.68     | -3.124333 | -0.49   |
| -4.182    | -5.255    | -2.383    | -5.0045 | -2.315    | -3.7695 | -3.59025  | -4.062667 | -0.2785 |
| -0.3975   | 0.06      | -1.3      |         | 0.346     | 0.214   | -0.661333 | -1.503    | -1.61   |
| -2.430667 | 1.023333  | -1.049667 | 0.75    | 1.341     | 0.91    | 0.18      | -1.1525   | -1.414  |
| 0.333333  | 0.92      | -0.79     | 0.63    | 0.605667  | 0.52    | -0.4025   | -1.193    | -1.05   |
| -3.39     | -0.19     | -1.936667 | -1.93   | -1.133667 | -3.97   | -1.800333 | -2.9965   | -1.55   |
| -1.72     | 0.903333  | -1.046667 | 0.82    | 1.1       | 0.62    | 0.1625    | -0.146667 | -0.97   |
| -2.33     | 1.34      | -0.81     | 0.765   | 0.786667  | 0.54    | -0.01775  | -0.313333 | -1.015  |
| -2.933333 | 0.003333  | -1.443333 | -3.514  | -2.44     | -3.34   | -1.9575   | -3.035    | 0.265   |
| -2.67     | -0.19     | -1.08     | -3.46   | -2.07     | -2.535  | -2.24     | -2.713333 | 0.035   |
| -3.753333 | -2.328667 | -2.819667 | -3.7435 | -2.106667 | -3.2715 | -2.89525  | -3.417    | -0.892  |
| -4.199    | -0.373333 | -1.895333 | -5.11   | -2.813333 | -3.4465 | -3.1275   | -3.506667 | -0.165  |
| -2.7435   | 0.5315    | 1.3495    | -2.09   | 0.917     |         | -1.854667 | -2.7635   | 1.004   |
| -2.18     | 0.706667  | -0.121667 | -3.76   | -2.183333 | -2.125  | -2.2375   | -2.266667 | 0.705   |
| -2.793333 | 0.16      | -0.99     | -2.915  | -2.052    | -2.095  | -2.2825   | -2.81     | -0.335  |
| -2.966667 | -0.08     | -1.593333 | -2.97   | -2.36     | -2.5    | -1.835    | -2.823333 | -0.645  |
| -3.337667 | -2.836667 | -3.6      | -2.735  | -1.68     | -3.085  | -2.065    | -1.336667 | -1.675  |
| -3.973333 | -4.536667 | -3.571667 | 0.1565  | -0.168333 | -2.855  | -2.267    | -1.279333 | -1.495  |
| -2.166667 | -1.963    | -1.988    | -0.15   | -0.26     | -2.578  | -2.126667 | -1.557667 | -1.245  |
| -3.333333 | -6.403667 | -2.604    | -3.36   | -1.98     | -3.185  | -2.4575   | -1.126667 | -1.63   |
| -2.95     | -3.170333 | -2.461667 | -2.7775 | -2.195    | -2.61   | -1.81175  | -1.250667 | -1.4485 |
| -3.303333 | -3.79     | -3.241333 | -3.06   | -2.453333 | -2.405  | -1.6375   | -1.278667 | -1.58   |
| -1.585    | -1.162    | 0.262     | -1.5    | -2.2325   | -1.318  | -1.165    | -1.125667 | -1.4405 |
| -2.15     | -2.446667 | -2.054    | -2.3    | -1.856667 | -1.85   | -0.965    | -0.863667 | -1.575  |
| -2.373333 | 1.3       | -0.996667 | 0.79    | 0.736667  | 0.455   | 0.015     | -0.293333 | -1.28   |
| -1.802333 | 1.063     | -1.177667 | 0.8845  | 0.79      | 0.7275  | 0.07275   | 0.086667  | -0.8775 |
| -1.956667 | 0.566667  | -2.283333 | 0.87    | -1.206667 | -2.3    | -1.526667 | -0.41     | -1.065  |
| -2.316    | 1.110667  | -3.013333 | 1.11    | -1.45     | -2.415  | -2.283333 | -0.256667 | -2.025  |
| -2.8245   | 0.2475    | -3.510333 | 0.91    | -1.6045   | -1.726  | -1.965333 | -0.347667 | -2.6745 |

|           |           |           |         |           |         |           |           |        |
|-----------|-----------|-----------|---------|-----------|---------|-----------|-----------|--------|
| -2.69     | 1.136667  | -2.023333 | 1.1865  | -1.448333 | -1.94   | -1.325    | -0.017    | -1.22  |
| -2.096667 | 1.156667  | -2.223333 | 1.1155  | -1.74     | -1.685  | -1.4525   | -0.186667 | -1.433 |
| -2.73     | 1.136667  | -3.44     | 1.35    | -1.666667 | -2.555  | -1.36125  | -0.286667 | -1.51  |
| -3.063333 | 0.99      | -3.087333 | 1.095   | -2.574    | -1.9895 | -1.33     | -0.2      | -1.365 |
| -1.913333 | 0.456667  | -1.736667 | -1.985  | -1.756667 | -1.705  | -0.9675   | 0.073333  | -1.04  |
| -2.476667 | 0.313333  | -2.273333 | -2.845  | -2.196667 | -2.12   | -1.1475   | -0.163333 | -1.255 |
| -1.551667 | 0.803333  | -1.566667 | 0.93    | 0.335333  | -2.002  | -1.35925  | 0.251333  | -1.235 |
| -0.646333 | -1.217333 | -1.507    | -2.611  | -1.506667 | -0.52   | -1.3095   | -1.598667 | -0.87  |
| -0.066667 | -0.153333 | 0.216667  | 0.171   | -0.073333 | 0.11    | 0.0575    | 0.029333  | 0.12   |
| -0.033333 | -0.13     | -0.06     | -0.11   | -0.316667 | -0.025  | -0.0325   | 0.146667  | -0.065 |
| 0.263333  | 0         | 0.28      | 0.28    | 0.003333  | 0.11    | 0.095     | 0.273333  | 0.225  |
| 0.139667  | 0.104333  | 0.298     | 0.3875  | 0.186667  | 0.196   | 0.18      | 0.331667  | 0.314  |
| 0.126333  | 0.031     | 0.235333  | 0.0995  | 0.243333  | 0.246   | 0.119     | 0.249667  | 0.325  |
| 0.003333  | 0.1       | 0.226667  | -0.07   | 0.083333  | 0.04    | -0.053333 | -0.85     | 0.36   |
| -0.01     | -0.03     | -0.196667 | 0.195   | 0.18      | 0.1     | 0.085     | 0.236667  | 0.09   |
| 0.236667  | -0.066667 | -0.3      | 0.345   | 0.273333  | -0.165  | 0.0425    | 0.106667  | 0.095  |
| 0.153333  | 0.04      | 0.07      | 0.17    | 0.126667  | 0.075   | 0.1275    | 0.086667  | 0.225  |
| 0.23      | 0.123333  | 0.356667  | 0.395   | -0.03     | 0.295   | 0.1275    | 0.247667  | 0.33   |
| 0.45      | 0.033333  | 0.223333  | 0.335   | 0.65      | 0.395   | 0.37      | 0.476667  | 0.57   |
| -0.08     | 0.1       | 0.115333  | 0.105   | 0.106667  | 0.005   | -0.05     | 0.086     | 0.005  |
| -0.03     | -0.233333 | -0.203333 | -0.06   | 0.03      | -0.17   | -0.13     | 0.075333  | -0.195 |
| 0.033333  | 0.033333  | 0.18      | 0.04    | 0         | 0.005   | 0.025     | 0.256667  | 0.085  |
| 0.033333  | -0.22     | 0.173333  | 0.105   | 0.679     | 0.235   | -0.036667 | 0.067667  | 0.32   |
| -1.73E-18 | -0.126667 | -0.023333 | -0.1035 | -0.356667 | -0.05   | -0.11325  | -0.146667 | 0.04   |
| 0.103333  | -0.142333 | 0.207667  | 0.1     | 0.305     | 0.215   | -0.033333 | -0.08     | 0.02   |
| 0.060333  | -0.296667 | 0.211667  | 0.2315  | 0.082667  | 0.16    | 0.26      | 0.123333  | 0.245  |
| -0.063333 | -0.066667 | -0.023333 | 0.165   | -0.163333 | -0.015  | -0.0025   | 0.076667  | 0.055  |
| -0.056667 | -0.16     | 0.073333  | -0.045  | 0.236667  | 0.115   | 0.0725    | 0.143333  | -0.08  |
| -0.033333 | -0.163333 | 0.083333  | -0.005  | 0.37      | 0.235   | 0.0725    | 0.224667  | 0.08   |
| -0.261    | 0.053667  | -0.033333 |         | 0.001     | 0.065   | 0.146     | -0.013    | 0.17   |
| -0.163333 | -0.26     | -0.166667 | -0.44   | -0.136667 | -0.035  | -0.236667 | -0.055    | 0.065  |
| 0.243333  | -0.016667 | 0.1       | 0.22    | -0.173333 | 0.05    | 0.0925    | 0.12      | 0.14   |
| -0.11     | -0.113333 | 0.276667  | 0.155   | 0.136667  | 0.095   | 0.1525    | 0.29      | 0.095  |
| 0.243333  | 0.146667  | 0.033333  | 0.315   | -0.199667 | 0.045   | -0.0525   | -0.176667 | -0.025 |
| 0.016667  | -0.006667 | 0.443333  | 0.245   | 0.22      | 0.18    | 0.1425    | 0.263333  | 0.2    |
| 0.015     | -0.31     | 0.203333  | 0.34    | -0.35     | 0.02    | -0.16     | -0.0325   | 0.11   |
| -0.096667 | -0.08     | 0.106667  | -0.125  | -0.44     | -0.12   | -0.21     | -0.063333 | -0.035 |
| 0.180333  | -0.21     | -0.618333 | 0.0985  | -0.16     | -0.42   | -0.1      | -0.325    | -0.16  |
| 0.04      | 0.026667  | 0.243333  | 0.13    | -0.046667 | 0.16    | 0.0725    | 0.23      | 0.14   |
| 0.06      | 0.013333  | 0.256667  | 0.075   | -0.29     | 0.205   | -0.045    | 0.136667  | 0.24   |
| 0.006667  | -0.163333 | 0.18      | 0.08    | -0.033333 | 0.02    | -0.03     | -0.126667 | -0.025 |
| 0.041667  | -0.029333 | -0.112667 | 0.092   | 0.093333  | -0.006  | 0.019     | 0.046667  | 0.281  |
| 1.093333  | 1.206667  | -1.182    | 1.175   | 0.919333  | 1.025   | 0.761     | 1.008333  | 1.34   |
| -0.13     | -0.196667 | -0.44     | -0.27   | -0.17     | 0.12    | -0.3075   | -0.286667 | -0.1   |
| -0.61     | -0.416667 | -0.308667 | -0.37   | -0.476333 | -0.38   | -0.7725   | 0.112333  | -0.15  |
| -0.333    | -0.138    | -0.273    | -0.352  | -0.215    | 0.07    | -0.871667 | -0.067    | 0      |
| -0.31     | -0.166667 | -0.22     | 0.15    | 0.077333  | 0.065   | 0.02975   | 0.075333  | 0.2    |
| 0.096667  | 0.13      | 0.076333  | 0.265   | 0.246333  | 0.265   | -0.069333 | 0.33      | 0.165  |
| -0.221667 | -0.212333 | -0.203667 | -0.1425 | -0.073333 | -0.005  | -0.00825  | -0.071    | 0.205  |
| 0.126667  | 0.086667  | 0.1       | 0.035   | -0.19     | 0.06    | 0.1       | 0.27      | 0.295  |
| -0.196667 | 0.263333  | -0.129    | -0.054  | 0.343333  | -0.2    | 0.0175    | 0.011333  | 0.085  |
| 0.076667  | 0.273333  | 0.11      | 0.28    | 0.023333  | 0.225   | 0.2       | 0.146667  | 0.3    |
| -0.2      | -0.113333 | -0.223333 | -0.04   | -0.34     | -0.37   | 0.0375    | -0.046667 | -0.19  |
| -0.006667 | -0.186667 | 0.123333  | 0.275   | -0.146667 | -0.11   | 0.1       | 0.176667  | -0.105 |
| 0.09      | 0.026667  | 0.116667  | 0.28    | 0.126667  | 0.055   | 0.175     | 0.126667  | 0.095  |

|           |           |           |         |           |         |           |           |         |
|-----------|-----------|-----------|---------|-----------|---------|-----------|-----------|---------|
| -0.113333 | -0.16     | -0.123333 | -0.05   | 0.432333  | -0.035  | -0.313333 | -0.12     | -0.035  |
| 0.343333  | 0.11      | 0.443333  | 0.37    | 0.46      | 0.355   | 0.3575    | 0.493333  | 0.355   |
| 0.463333  | -0.173333 | -0.1      | 0.085   | 0.42      | 0.085   | 0.2       | 0.237667  | -0.03   |
| 0.38      | 0.14      | 0.24      | 0.23    | 0.38      | 0.255   | 0.4025    | 0.273333  | 0.175   |
| 0.076667  | -0.023333 | 0.273333  | 0.22    | 0.13      | 0.275   | 0.1375    | 0.28      | 0.3     |
| 0.15      | -0.206667 | 0.14      | 0.305   | 0.033333  | 0.115   | 0.07      | 0.12      | 0.21    |
| -0.196667 | -0.85     | -0.986333 | -0.13   | -0.434    | -0.26   | -0.54875  | -0.564333 | -0.635  |
| -0.057333 | -0.145    | -0.231    | 0.049   | 0.622667  | -0.3155 | 0.056     | -0.031667 | 0.0395  |
| 0.4       | 0.043333  | 0.29      | 0.335   | 0.453333  | 0.335   | 0.2825    | 0.266     | 0.34    |
| 0.173333  | -0.104667 | 0.286667  | -0.193  | 0.223333  | -0.072  | 0.137     | 0.301     | 0.2135  |
| -0.003333 | -0.033333 | -0.126667 | 0.04    | -0.46     | 0.03    | -0.1275   | 0.086667  | -0.015  |
| 0.007667  | 0.074667  | 0.304667  | 0.4685  | 0.066667  | 0.1235  | 0.03175   | 0.264333  | 0.2655  |
| -0.468333 | -0.215    | -0.9      | -0.1005 | 0.49      | -0.364  | -0.556667 | -0.659    | -0.262  |
| 0.046667  | -0.03     | -0.066667 | 0.175   | -0.106667 | 0.005   | -0.16     | -0.02     | -0.085  |
| -0.153333 | -0.16     | -0.063333 | 0.199   | -0.166667 | -0.16   | -0.1575   | -0.06     | -0.12   |
| -0.165667 | -0.794    | -0.453333 | -0.05   | -0.176667 | -0.295  | -0.255    | -0.183333 | -0.255  |
| -1.256667 | -0.143333 | -1.5      | -1.81   | -1.206667 | -1.1365 | -1.145    | -1.103333 | -1.22   |
| 0.003333  | 0.176667  | 0.193333  | 0.305   | 0.006667  | 0.135   | 0.1       | 0.103333  | 0.05    |
| 0.183333  | 0.003333  | 0.096667  | 0.005   | -0.386667 | -0.01   | 0.0475    | 0.046667  | 0.16    |
| 0.106667  | 0.036667  | 0.193333  | 0.015   | -0.323333 | -0.2    | -0.085    | -0.486667 | 0.1     |
| -0.853667 | 0.546667  | -1.652667 | -2.144  | -1.99     | -2.05   | -1.7375   | -1.453333 | -0.4655 |
| -0.976667 | 0.026667  | -0.68     | -2.287  | -1.673333 | -2.15   | -1.065    | -0.894    | -0.7765 |
| 0.266667  | 0.07      | -0.073333 | -0.12   | -0.403333 | -0.315  | -0.1025   | -0.026667 | 0.02    |
| -0.016667 | -0.14     | 0.096667  | 0.075   | -0.2      | -0.16   | -0.0925   | -0.019    | 0.2     |
| 0.05      | -0.026667 | 0.276667  | 0.31    | -0.047    | 0.215   | 0.24675   | 0.27      | 0.225   |
| 0.18      | -0.033333 | 0.173333  | 0.02    | -0.063333 | 0.12    | 0.165     | 0.36      | 0.125   |
| -0.15     | -0.203333 | 0.09      | -0.11   | -0.24     | 0.005   | -0.11     | -0.05     | -0.09   |
| 0.091667  | -0.059    | 0.272667  | 0.2345  | 0.332333  | -0.037  | 0.137     | 0.316     | 0.026   |
| -0.281    | -0.023    | 0.076     | 0.006   | -0.553333 | -0.319  | -0.0305   | 0.299333  | -0.052  |
| -0.166667 | 0.09      | 0.163333  | 0.06    | 0.103333  | -0.015  | 0.1025    | 0.196667  | 0.425   |
| -0.273667 | -0.125    | -0.126667 | -0.17   | 0.063333  | -0.108  | 0.02575   | 0.101     | 0.018   |
| -0.116667 | -0.033333 | -0.01     | -0.035  | -0.21     | -0.055  | -0.12     | -0.036667 | 0.03    |
| -0.033333 | 0.066667  | 0.246667  | 0.055   | 0.163333  | 0.11    | 0.15      | 0.2       | 0.395   |
| 0.136667  | 0.186667  | 0.396667  | 0.3     | 0.106667  | 0.24    | 0.2275    | 0.3       | 0.08    |
| 0.186667  | 0.033333  | 0.306667  | 0.37    | 0.066667  | 0.415   | 0.1375    | 0.203333  | 0.24    |
| -1.29     | -1.721667 | -0.105    | -0.21   | -1.3      | -1.2265 | -0.58     |           | -0.9285 |
| -0.312333 | -0.263333 | -0.599667 | -0.85   | -0.223333 | -0.8195 | -0.2395   | -0.538    | -1.6395 |
| -1.923333 | 0.843333  | -1.593333 | -1.67   | -0.39     | -1.355  | -0.925    | -1.18     | -1.085  |
| -2.436667 | 1.18      | -1.03     | 0.605   | 0.916667  | 0.355   | 0.03      | -0.22     | -1.225  |
| -1.9      | 0.906667  | -1.003333 | 0.89    | 0.996667  | 0.64    | 0.1175    | -0.13     | -0.895  |
| -0.519333 | -0.312333 | -1.12     | -2.2715 | 0.170333  | -0.6385 | -0.70325  | -0.336    | -0.5035 |
| 0.031667  | 0.043333  | 0.213333  | 0.1295  | -0.139    | 0.22    | 0.2925    | 0.255     | -0.02   |
| 0.036667  | 0.086667  | 0.086667  | -0.035  | -0.12     | 0.005   | -0.0775   | 0.006667  | 0       |
| 0.086667  | 0.003333  | 0.223333  | -0.095  | -0.243333 | 0.175   | 0.09      | 0.153333  | 0.115   |
| -0.143333 | 0.066667  | 0.19      | -0.025  | -0.18     | -0.035  | 0.12      | 0.163333  | 0.175   |
| 0.126667  | 0.056667  | 0.156667  | 0.09    | -0.123333 | 0.02    | 0.0225    | 0.096333  | 0.18    |
| 0.18      | 0.053333  | 0.456667  | 0.345   | 0.166667  | 0.165   | 0.16      | 0.323333  | 0.165   |
| 0.08      | -0.06     | 0.366667  | 0.23    | -0.133333 | 0.18    | 0.1325    | 0.36      | 0.36    |
| -0.274333 | -0.322    | -0.683    | -0.284  | -0.6535   | -0.4155 | -0.249333 | -0.311333 | -0.335  |
| -1.086667 | -1.836667 | -0.663333 | -1.575  | -1.29     | -1.12   | -0.6325   | -0.68     | -0.2    |
| -0.021667 | 0.098667  | 0.42      | 0.2205  | -0.15     | 0.24    | 0.105     | 0.265667  | 0.21    |
| 0.1       | 0.143333  | 0.123333  | 0.195   | 0.033333  | 0.155   | 0.0375    | 0.113333  | 0.315   |
| 0.136667  | 0.133333  | 0.29      | 0.315   | 0.216667  | 0.19    | 0.07      | 0.116667  | 0.185   |
| -0.046667 | -0.18     | 0.19      | 0.145   | 0.163333  | 0.22    | 0.228     | 0.405333  | 0.14    |
| -0.043333 | -0.15     | 0.21      | 0.01    | -0.293333 | -0.165  | 0.03175   | 0.035     | 0.145   |

|           |           |           |         |           |         |           |           |         |
|-----------|-----------|-----------|---------|-----------|---------|-----------|-----------|---------|
| 0.27      | -0.05     | 0.263333  | 0.24    | 0.116667  | 0.295   | 0.025     | 0.135333  | 0.315   |
| 0.226667  | 0.12      | 0.343333  | 0.215   | -0.09     | 0.225   | 0.1025    | 0.16      | 0.22    |
| -0.046667 | -0.153333 | 0.086667  | -0.365  | -0.023333 | -0.125  | 0.0715    | -0.06     | -0.1795 |
| 0.187333  | -0.102667 | -0.069333 | 0.0935  | 0.137667  | -0.0595 | 0.272     | 0.288     | 0.127   |
| -0.461667 | -0.073333 | -0.919667 | -0.304  | -0.706667 | -0.45   | -0.668    | -0.61     | -0.515  |
| -1.619    | -3.058333 | -1.22     | -2.3635 | -1.397333 | -1.31   | -0.84475  | -0.629667 | -0.78   |
| -0.647667 | 0.337667  | -0.525333 | -1.0945 | -0.41     | -0.245  | -0.43875  | -0.586667 | -0.265  |
| 0.116667  | -0.093333 | 0.013333  | 0.145   | -0.03     | 0.18    | 0.0825    | 0.133333  | 0.12    |
| -0.096667 | -0.173333 | -0.06     | -0.178  | 0.104667  | -0.195  | -0.16     | -0.000333 | 0.015   |
| 0.14      | 0.106667  | 0.2       | 0.325   | 0.013333  | 0.17    | 0.06      | 0.29      | 0.255   |
| -0.113333 | -0.26     | 0.206667  | 0.13    | -0.21     | 0.075   | -0.02     | -0.03     | 0.035   |
| -1.786    | -2.639667 | -1.891333 | -2.415  | -1.24     | -1.528  | -1.4525   | -1.865333 | -0.9215 |
| -0.34     | -0.033333 | -0.143333 | -0.175  | -0.363333 | -0.045  | -0.1125   | -0.33     | -0.015  |
| -0.138    | -1.0415   | -0.042667 | -0.0055 | 0.55      | -0.101  | 0.3495    | 0.426333  | -0.187  |
| -0.003333 | -0.106667 | 0.023333  | 0.13    | 0.2       | 0.07    | 0.185     | 0.25      | -0.145  |
| -0.033333 | -0.103333 | 0.114667  | 0.435   | 0.153333  | -0.1    | -0.025    | -0.066667 | -0.08   |
| -0.086667 | -0.023333 | 0.078667  | 0.184   | 0.303333  | 0.1     | 0.0045    | -0.003    | -0.125  |
| -0.103333 | 0.056667  | 0.166667  | -0.01   | 0.066667  | 0.115   | 0.16      | 0.21      | 0.13    |
| 0.133333  | 0.153333  | -0.21     | 0.0075  | -0.017333 | 0.035   | -0.0995   | -0.064667 | 0.16    |
| 0.01      | -0.106667 | -0.363333 | -0.235  | -0.27     | -0.35   | -0.035    | -0.155    | -0.39   |
| 0.033333  | -0.076667 | 0.153333  | -0.115  | 0.256667  | 0.06    | 0.16      | 0.186667  | 0.26    |
| -0.079    | -0.314333 | 0.27      | 0.14    | 0.203333  | 0.0975  | 0.11975   | 0.278333  | 0.086   |
| -0.086667 | -0.326667 | -0.076667 | -0.225  | 0.035     | -0.025  | -0.063    | -0.58     | -0.09   |
| 0.036667  | -0.026667 | 0.24      | 0.015   | 0.39      | 0.205   | 0.21725   | 0.395     | 0.1     |
| 0.278667  | -0.010667 | 0.405333  | 0.3165  | 0.275     | 0.2625  | 0.19425   | 0.402667  | 0.2525  |
| 0.116667  | -0.196667 | -0.11     | -0.07   | -0.386667 | -0.095  | -0.11     | -0.082    | -0.195  |
| 0.001333  | -0.118    | 0.022     | 0.1745  | -0.221    | 0.225   | 0.084     | 0.181     | 0.22    |
| 0.07      | -0.006667 | 0.083333  | 0.265   | -0.22     | 0.115   | -0.025    | 0.03      | -0.125  |
| -0.37     | -0.32     | -0.032333 | -0.15   | -0.176667 | -0.035  | 0.01275   | -0.153333 | -0.035  |
| 0.300333  | 0.131333  | 0.181     | 0.123   | 0.063333  | -0.0915 | -0.0825   | 0.046     | -0.0645 |
| -0.046667 | -0.236667 | 0.006667  | 0.03    | 0.166667  | 0       | 0.0175    | 0.113333  | 0.07    |
| 0.14      | 0.033333  | -0.033333 | 0.07    | -0.313333 | 0.015   | -0.3125   | -0.233333 | -0.105  |
| -2.584    | 0.017     | -1.718333 | -3.33   | -1.881667 | -2.273  | -1.8785   | -2.264333 | -1.2875 |
| -0.166667 | -0.036667 | 0.126667  | 0.17    | -0.04     | 0.145   | 0.127     | 0.23      | 0.145   |
| -1.545667 | 0.301667  | -0.702    | 0.017   | 0.585     | 0.06    | -0.046667 | -0.7275   | 0.346   |
| -0.457667 | 0.016667  | -0.656667 | -0.85   | -0.866667 | -1.06   | -0.66     | -0.099    | -0.845  |
| 0.043333  | -0.266667 | -0.703333 | -0.8    | -0.766667 | -0.79   | -0.491    | -0.401333 | -0.31   |
| 0.073333  | -0.123333 | -0.13     | 0.06    | 0.133333  | 0.235   | -0.2275   | -0.07     | 0.225   |
| 0.093333  | -0.06     | 0.393333  | 0.3     | 0.319     | 0.079   | 0.28325   | 0.382333  | 0.085   |
| -0.126    | -0.37     | -0.131    | 0.003   | 0.13      | -0.145  | -0.297    | 0.14      | -0.265  |
| 0.25      | -0.183333 | 0.236667  | 0.26    | 0         | -0.14   | 0.086667  | 0.1       | -0.165  |
| -0.25     | -0.38     | -0.28     | -0.11   | -0.25     | -0.38   | -0.166667 | -0.17     | -0.02   |
| -0.073333 | -0.113333 | -0.031667 | 0.025   | -0.12     | 0.075   | -0.07     | 0.023333  | 0.06    |
| -0.024333 | -0.407    | -0.790333 | -0.219  | 0.26      | -0.3185 | -0.318333 | -0.273    | -0.1285 |
| 0.006667  | -0.32     | 0.006667  | 0.205   | -0.066667 | -0.04   | 0.04      | -0.006667 | 0.04    |
| 0.153333  | -0.066667 | 0.07      | -0.075  | 0.16      | 0.005   | 0.02      | 0.2       | 0.195   |
| 0.036667  | -0.133333 | 0.123333  | 0.095   | -0.146667 | 0.035   | -0.0675   | -0.083333 | 0.165   |
| -0.09     | -0.086667 | -0.013333 | -0.22   | -0.316667 | -0.795  | -0.0875   | -0.156667 | -0.52   |
| 0.036667  | 0.05      | -0.006667 | 0.05    | -0.02     | 0.145   | -0.015    | 0.096667  | 0.37    |
| 0.316667  | 0.096667  | 0.14      | 0.18    | 0.303333  | 0.28    | 0.1775    | 0.25      | 0.345   |
| -0.01     | 0.13      | -0.02     | 0.246   | 0.113333  | 0.005   | -0.053333 | 0.282667  | 0.3     |
| 0.16      | 0.023333  | 0.056667  | 0.325   | 0.263333  | 0.3     | 0.20125   | 0.37      | 0.28    |
| 0.02      | -0.033333 | 0.18      | -0.185  | 0.083333  | 0.125   | 0.295     | 0.32      | 0.15    |
| -0.226667 | -0.293333 | -0.003333 | 0.17    | -0.225333 | -0.385  | -0.146667 | -0.31     | -0.02   |
| 0.2       | 0.053333  | 0.153333  | 0.28    | 0.036667  | 0.035   | 0.03      | 0.18      | 0.31    |

|           |           |           |         |           |         |           |           |         |
|-----------|-----------|-----------|---------|-----------|---------|-----------|-----------|---------|
| 0.170333  | 0.008     | -0.067    | -0.2675 | -0.45     | 0.039   | -0.0725   | -0.036333 | 0.0045  |
| 0.103333  | -0.006667 | 0.236667  | 0.245   | 0.07      | 0.15    | -0.06     | 0.17      | 0.11    |
| 0.257667  | -0.106667 | 0.199     | 0.0925  | -0.006667 | 0.1     | 0.1685    | 0.119333  | 0.135   |
| 0.25      | 0.2       | 0.206667  | 0.25    | 0.143333  | 0.18    | 0.1625    | 0.24      | 0.225   |
| 0.046667  | -0.03     | 0.29      | 0.07    | 0.323333  | 0.135   | 0.225     | 0.316667  | 0.135   |
| 0.064     | -0.018333 | 0.304333  | 0.0315  | 0.531     | 0.304   | 0.3995    | 0.312     | 0.1285  |
| 0.033333  | -0.16     | 0.276667  | 0.275   | 0.266667  | 0.26    | 0.2125    | 0.35      | 0.175   |
| 0.303333  | 0.2       | 0.413333  | 0.465   | -0.056667 | 0.3     | 0.145     | 0.38      | 0.115   |
| 0.27      | 0.083333  | 0.113333  | 0.49    | 0.233333  | 0.33    | 0.2025    | 0.406667  | 0.3285  |
| 0.226667  | 0.18      | 0.37      | 0.485   | 0.243333  | 0.38    | 0.2075    | 0.466667  | 0.245   |
| 0.273333  | 0.043333  | 0.27      | 0.32    | 0.43      | 0.29    | 0.1975    | 0.306667  | 0.245   |
| 0.883333  | 0.273333  | 0.043333  | 0.41    | -0.893333 | 0.66    | 0.4775    | 0.696667  | -0.02   |
| 0.23      | 0.133333  | 0.14      | 0.405   | 0.153333  | 0.11    | 0.1725    | 0.206667  | 0.19    |
| 0.1       | -0.253333 | -0.236667 | 0.17    | 0.023333  | 0.11    | -0.12375  | 0.005333  | 0.095   |
| 0.22      | 0.18      | 0.405333  | 0.435   | 0.076667  | 0.25    | 0.1775    | 0.261667  | 0.31    |
| 0.303333  | 0.4       | 0.156     | 0.309   | 0.333333  | 0.32    | 0.21      | 0.29      | 0.435   |
| 0.356667  | 0.14      | 0.263333  | 0.425   | 0.1       | 0.23    | 0.06      | 0.063333  | 0.335   |
| 0.421333  | 0.215333  | 0.421333  | 0.396   | 0.606667  | 0.4645  | 0.39325   | 0.599333  | 0.4175  |
| 0.193333  | -0.045333 | 0.345333  | 0.455   | 0.253333  | 0.227   | 0.2205    | 0.373333  | 0.261   |
| -0.133333 | -0.034667 | 0.253333  | -0.09   | 0.073333  | -0.02   | -0.1125   | 0.039333  | -0.365  |
| 0.010333  | -0.097667 | 0.187667  | 0.156   | 0.337     | 0.111   | 0.18225   | 0.178667  | 0.133   |
| 0.436667  | 0.636667  | 0.287667  | 1.195   | 0.266667  | 0.63    | 0.3525    | 0.55      | 0.061   |
| 0.113333  | 0.526667  | -0.033333 | 0.2795  | 0.08      | 0.38    | 0.12425   | 0.04      | 0.06    |
| -0.343333 | -0.06     | -0.389333 | -0.1    | 0.398     | 0.04    | -0.02025  | 0.082333  | -0.405  |
| 0.05      | -0.063333 | 0.08      | 0.14    | -0.136667 | -0.025  | -0.0475   | -0.043333 | -0.15   |
| -0.166667 | 0.056667  | -0.003333 | 0.12    | -0.01     | 0.075   | -0.04375  | 0.043333  | 0.09    |
| -0.37     | 0.194     | -0.01     | -0.4385 | -0.422    | 0.219   | 0.5615    | 0.645     | -0.3    |
| 1.265333  | 0.605667  | -1.459333 | 1.27    | 0.97      | 0.833   | 0.4985    | 0.924     | 1.1185  |
| 1.026     | -0.205    | -0.675    |         | 0.384     | -0.124  | -0.578    | -0.151    | -0.182  |
| 0.246667  | -0.17     | 0.323333  | 0.175   | 0.053333  | 0.285   | 0.13      | 0.42      | 0.12    |
| 0.12      | -0.27     | -0.313333 | -0.065  | -0.143333 | 0.225   | 0.0725    | 0.16      | -0.025  |
| -0.006667 | -0.143333 | 0.186667  | 0.02    | -0.166667 | 0.085   | 0.075     | -0.02     | 0.02    |
| 0.016667  | -0.33     | -0.036667 | 0.19    | -0.1      | -0.165  | -0.077    | 0.006667  | -0.015  |
| 0.383333  | -0.173333 | 0.233333  | 0.22    | -0.12     | 0.215   | 0.1475    | 0.316667  | -0.025  |
| 0.146667  | -0.15     | 0.08      | 0.15    | -0.27     | 0.09    | -0.02     | -0.026667 | -0.08   |
| -0.096667 | -0.123333 | 0.4       | 0.135   | 0.15      | 0.33    | 0.0825    | 0.093333  | 0.095   |
| 0.17      | -0.02     | 0.103333  | 0.1     | 0.086667  | 0.358   | 0.26075   | 0.125     | 0.35    |
| 0.316667  | -0.116667 | 0.056667  | 0.185   | 0.056667  | 0.175   | 0.1605    | 0.268333  | 0.225   |
| -0.209    | -0.707333 | -0.261    | -0.381  | -0.109667 | -0.19   | -0.225667 | -0.12     | 0.04    |
| 0.4       | -0.09     | 0.266667  | 0.115   | 0.246667  | 0.385   | 0.2225    | 0.333333  | 0.44    |
| 0.086667  | 0.153333  | 0.326667  | 0.37    | 0.15      | 0.26    | 0.0325    | 0.3       | 0.095   |
| 0.056667  | -0.053333 | 0.343333  | 0.265   | 0.123333  | 0.305   | 0.2025    | 0.203333  | 0.155   |
| -0.216667 | -0.02     | 0.296667  | 0.395   | 0.043333  | 0.159   | 0.015     | 0.006333  | 0.15    |
| -2.199    | -3.258    | -1.973    | -1.0375 | -0.529    | -2.36   | -1.837    | -2.372    | -1.31   |
| 0.386667  | 0.443333  | -0.643333 | -2.14   | -1.016667 | 0.5     | 0.0775    | 0.226667  | 0.21    |
| -0.073667 | -0.223333 | -0.043333 | 0.015   | -0.17     | -0.12   | -0.1175   | -0.01     | -0.12   |
| -0.28     | -0.413333 | 0.143333  | -0.155  | -0.57     | 0.02    | -0.28     | -0.14     | -0.005  |
| -0.286667 | -0.376667 | -0.066667 | -0.58   | -0.383333 | -0.405  | -0.3525   | -0.22     | -0.63   |
| 0.069     | -0.020333 | -0.034667 | 0.096   | -0.09     | -0.0085 | -0.0615   | 0.051333  | -0.0765 |
| 0.24      | -0.083333 | 0.137     | 0.15    | -0.016667 | 0.21    | 0.1675    | 0.3       | 0.36    |
| -0.013333 | -0.26     | 0.09      | -0.505  | -0.076667 | -0.075  | -0.163333 | 0.085     | 0.51    |
| 0.036667  | -0.116667 | 0.203333  | 0.12    | 0.2       | 0.255   | 0.164     | 0.132     | 0.315   |
| 0.273333  | 0.113333  | 0.166667  | 0.29    | 0.243333  | 0.27    | -0.02     | 0.073333  | 0.315   |
| 0.1       | -0.033333 | 0.276667  | 0.23    | 0.09      | 0.245   | 0.0575    | 0.206     | 0.225   |
| 0.14      | -0.448    | -0.1      | -0.06   | 0.203333  | 0.065   | 0.11325   | 0.047     | 0.055   |

|           |           |           |         |           |         |           |           |        |
|-----------|-----------|-----------|---------|-----------|---------|-----------|-----------|--------|
| -0.136667 | -0.073333 | -0.19     | 0.115   | -0.263333 | 0.09    | -0.195    | -0.043333 | 0.015  |
| 0.263667  | 0.082333  | 0.117333  | 0.1905  | 0.243333  | 0.268   | 0.213     | 0.240333  | 0.024  |
| -0.13     | -0.033333 | -0.463333 | 0.14    | -0.396667 | -0.04   | -3.47E-18 | -0.036667 | -0.055 |
| 0.118333  | -0.105333 | 0.064     | -0.01   | 0.03      | 0.0395  | 0.10775   | 0.256667  | 0.0785 |
| -0.126667 | 0.053333  | -0.04     | 0.16    | 0.003333  | 0.035   | -0.27075  | -0.255    | 0.065  |
| 0.003333  | 0.026667  | -0.076667 | 0.1375  | 0         | 0.005   | -0.24975  | -0.3      | 0.205  |
| 0.126667  | -0.093333 | -0.033333 | 0.151   | -0.116667 | -0.085  | -0.01     | -0.083333 | 0      |
| -0.063333 | -0.216333 | -0.066667 | 0.42    | 0.579667  | -0.335  | 0.13      | 0.172333  | 0.24   |
| 0.4125    | -0.5495   | -2.131    | -0.113  | 0.149     | -0.523  | -0.3965   |           | 0.115  |
| 0.292     | 0.123333  | 0.355     | 0.4435  | 0.263333  | 0.268   | 0.0955    | 0.181333  | 0.279  |
| 0.043333  | 0.196667  | 0.316667  | 0.37    | 0.426667  | 0.43    | 0.165     | 0.314667  | 0.36   |
| -0.153333 | 0.08      | 0.14      | 0.0625  | 0.2       | -0.06   | -0.0625   | 0.068667  | -0.045 |
| -0.09     | 0.076667  | 0.02      | 0.095   | -0.2      | -0.055  | -0.08     | -0.003333 | 0      |
| 0.276667  | -0.15     | 0.07      | 0.035   | 0.116667  | -0.06   | 0.135     | 0.183333  | 0.13   |
| 0.436667  | 0.063333  | 0.27      | 0.245   | 0.493333  | 0.3     | 0.2375    | 0.363333  | 0.435  |
| 0.042333  | -0.206667 | -0.383333 | 0.072   | 0.156667  | 0       | 0.17      | -0.041667 | 0.06   |
| 0.123333  | -0.11     | 0.136667  | 0.38    | 0.28      | 0.315   | 0.27      | 0.27      | 0.15   |
| 0.34      | 0.233333  | 0.23      | 0.125   | 0.146667  | 0.225   | 0.2575    | 0.436667  | 0.27   |
| 0.426667  | 0.076667  | 0.54      | 0.245   | 0.293333  | 0.405   | 0.445     | 0.62      | 0.47   |
| -0.203333 | -2.463333 | -0.909333 | -2.33   | -0.043333 | -1.485  | -1.1      | -1.632667 | -0.78  |
| 0.616     | 0.025     | -0.772667 | 0.329   | 0.605667  | 0.045   | 0.071333  | 0.35      | -0.24  |
| 0         | -0.386667 | 0.182333  | -0.2475 | 0.24      | -0.115  | 0.27925   | 0.14      | 0.055  |
| 0.103333  | -0.093333 | 0.05      | -0.05   | 0.123333  | -0.115  | 0.02      | 0.01      | -0.005 |
| 0.19      | 0.139     | 0.246667  | 0.09    | 0.249     | 0.34    | 0.158     | 0.151667  | 0.01   |
| -1.496667 | 0.34      | -0.14     | -0.22   | 0.733333  | 0.365   | -0.13325  | -0.082    | -0.1   |
| 0.123333  | -0.07     | 0.129667  | 0.67    | 0.268333  | 0.27    | 0.20575   | 0.535333  | 0.145  |
| 0.193333  | 0.053333  | 0.11      | 0.47    | 0.324667  | 0.28    | 0.5225    | 0.493333  | 0.02   |
| -0.036667 | 0.01      | 0.15      | 0.315   | -0.183333 | 0.185   | 0.0525    | 0.056667  | 0.105  |
| -0.047667 | -0.175    | -0.017    | 0.029   | -0.256667 | 0.08    | 0.111     | -0.031667 | 0.025  |
| -0.226667 | -0.153333 | -0.096    | 0.11    | -0.553333 | 0.15    | -0.0555   | -0.047333 | -0.075 |
| -0.006667 | 0.02      | 0.183333  | 0.22    | -0.103333 | 0.1     | 0         | 0.166667  | 0.08   |
| -0.11     | 0.233333  | 0.146667  | 0.485   | 0.073333  | 0.245   | 0.05      | 0.235     | 0.195  |
| 0.043333  | -0.166667 | 0.25      | 0.1     | 0.066667  | 0.255   | 0.18      | 0.153333  | -0.07  |
| -0.03     | -0.066667 | -0.001667 | 0.115   | -0.203333 | 0.051   | -0.0775   | 0.087     | -0.01  |
| 0.13      | 0.113333  | 0.286667  | 0.325   | 0.126667  | 0.435   | 0.235     | 0.356667  | 0.225  |
| 0.063333  | -0.02     | -0.033333 | 0.28    | -0.046333 | -0.06   | 0.0675    | 0.113333  | -0.055 |
| 0.09      | 0.196667  | 0.213333  | 0.21    | 0.02      | 0.14    | 0.2       | 0.356     | 0.205  |
| -0.1      | 0.113333  | 0.24      | 0.325   | 0.29      | 0.18    | 0.1225    | 0.27      | 0.185  |
| 0.028333  | -0.123333 | 0.060333  | 0.339   | 0.081333  | 0.09    | 0.094     | 0.117333  | 0.145  |
| 0.093333  | -0.336667 | 0.007333  | -0.07   | -0.046667 | 0.165   | 0.05      | 0.176667  | 0.17   |
| 0.053333  | -0.153333 | -0.086667 | 0.06    | 0.22      | 0.045   | 0.115     | 0.143333  | 0.17   |
| -0.006667 | -0.006667 | 0.16      | 0.33    | 0.34      | -0.03   | 0.123333  | 0.21      | 0.27   |
| 0.123333  | 0.063333  | 0.246     | -0.385  | -0.013333 | 0       | 0.1525    | 0.25      | 0.265  |
| 0.323333  | 0.076667  | 0.25      | 0.265   | 0.223333  | 0.195   | 0.18275   | 0.330333  | 0.055  |
| 0.256667  | -0.07     | 0.2       | 0.128   | -0.023333 | 0.235   | 0.2       | -0.11     | 0.095  |
| 0.16      | -0.27     | -0.08     | 0.2455  | -0.096667 | -0.3295 | 0.0675    | 0.086667  | -0.05  |
| -0.203333 | 0.103333  | 0.066667  | 0.303   | 0.226667  | -0.015  | -0.025    | -0.094667 | -0.02  |
| 0.186667  | 0.283333  | 0.353333  | 0.455   | 0.19      | 0.285   | 0.175     | 0.287667  | 0.22   |
| 0.423333  | 0.133333  | 0.53      | 0.515   | 0.333333  | 0.375   | 0.3625    | 0.608667  | 0.29   |
| 0.093333  | -0.026667 | 0.373333  | 0.333   | 0.336667  | 0.425   | 0.2675    | 0.424     | 0.225  |
| 0.22      | 0.066667  | 0.316667  | 0.19    | 0.32      | 0.22    | 0.1125    | 0.14      | 0.19   |
| 0.325     | 0         | 0.305     | 0.38    | 0.5       | 0.37    | -0.11425  | 0.49      | 0.56   |
| 0.246     | -0.285333 | -0.056    | -0.17   | 0.331     | 0.098   | 0.283     | 0.438667  | 0.5065 |
| 0.176667  | 0.203333  | 0.433333  | 0.295   | 0.493333  | 0.485   | 0.39      | 0.58      | 0.4    |
| 0.383333  | 0.126667  | 0.406667  | 0.36    | 0.32      | 0.4     | 0.2115    | 0.376667  | 0.1425 |

|           |           |           |         |           |         |           |           |         |
|-----------|-----------|-----------|---------|-----------|---------|-----------|-----------|---------|
| 0.166667  | -0.07     | 0.083333  | 0.3495  | -0.113333 | 0.155   | 0.09175   | 0.065333  | 0.16    |
| 0.42      | -0.053333 | 0.41      | 0.335   | 0.39      | 0.305   | 0.2       | 0.453333  | 0.195   |
| 0.536667  | 0.086667  | -0.993333 | 0.029   | -0.2045   | 0.1     | 0.07      | -0.275    | -1.37   |
| 0.129667  | 0.184     | -0.083667 | -0.122  | -0.11     | -0.25   | -0.08525  | -0.172667 | -0.135  |
| 0.176667  | 0.006667  | 0.253333  | 0.315   | 0.216667  | 0.125   | 0.1025    | 0.395     | 0.055   |
| -0.02     | 0.15      | 0.138667  | 0.235   | 0.156667  | 0.155   | -0.01     | 0.103333  | 0.05    |
| 0.089333  | 0.097333  | 0.179     | -0.07   | 0.16      | 0.1745  | 0.197     | 0.342333  | 0.253   |
| 0.11      | -0.416667 | 0.173333  | 0.115   | 0.246667  | 0.13    | 0.1125    | 0.146667  | 0.095   |
| -0.0425   | 0.063     | -0.073    | -0.118  |           |         | 0.0295    | -0.098    | -0.576  |
| 0.413333  | 0.656667  | -0.855333 | 0.88    | 0.91      | 0.87    | 0.503333  | -2.165    | -1.03   |
| 0.556667  | 0.26      | 0.26      | 0.385   | 0.41      | 0.34    | 0.2625    | 0.266667  | 0.341   |
| 0.126667  | -0.14     | -0.053333 | 0.05    | -0.01     | 0.115   | -0.02     | -0.04     | 0.115   |
| -0.03     | -0.040667 | 0.074333  | 0.1245  | 0.103333  | -0.104  | -0.146    | -0.098333 | -0.089  |
| 0.436667  | 0.133333  | 0.21      | -0.145  | 0.363333  | 0.07    | -0.0175   | 0.153333  | -0.06   |
| -1.096667 | -0.406667 | -0.626667 | -2.005  | -0.563333 | -1.58   | -1.0125   | -1.406667 | -1.045  |
| -0.843333 | -0.32     | -0.493333 | -1.32   | -0.426667 | -1.25   | -0.5475   | -0.69     | -0.785  |
| 0.173667  | -0.003667 | 0.199333  | -0.061  | -0.07     | 0.22    | 0.20825   | 0.056667  | 0.17    |
| 0.193333  | 0.08      | 0.203333  | 0.575   | 0.096667  | 0.215   | 0.19      | 0.263333  | 0.14    |
| 0.18      | -0.183333 | 0.016667  | -0.19   | 0.377     | 0.225   | 0.036667  | 0.215     | 0.355   |
| 0.203333  | -0.073333 | 0.403333  | 0.125   | 0.11      | 0.34    | 0.1575    | 0.366667  | 0.235   |
| 0.286667  | -0.153333 | 0.48      | 0.16    | 0.536667  | 0.4     | 0.2725    | 0.527333  | 0.37    |
| -0.293333 | -0.396667 | 0.016667  | -0.315  | -0.0295   | -0.17   | -0.283333 | -0.06     | -0.005  |
| 0.260667  | -0.26     | 0.04      | -0.0675 | 0.158     | 0.1825  | 0.1315    | 0.0905    | 0.0325  |
| -0.186667 | -0.453333 | -0.041    | 0.0735  | -0.113333 | 0.135   | -0.19775  | -0.315    | -0.145  |
| -0.446667 | -0.855667 | -0.533    | -0.36   | 0.023333  | -0.42   | -0.44     | 0.2135    | -0.318  |
| 0.076667  | -0.066667 | 0.316667  | 0.465   | 0.07      | 0.11    | 0.05      | 0.293333  | 0.105   |
| 0.376667  | 0.261     | 0.235667  | 0.259   | 0.136667  | 0.1915  | 0.08625   | 0.273667  | 0.2615  |
| 0.23      | -0.063333 | -0.03     | 0.11    | 0.036667  | 0.02    | 0.115     | 0.16      | 0.08    |
| 0.013333  | -0.253333 | 0.1       | 0.135   | -0.003333 | 0.205   | 0.32      | 0.339667  | -0.015  |
| -0.111667 | -0.283333 | -0.07     | 0.14    | -0.423333 | 0.04    | -0.01     | 0.003333  | -0.095  |
| 0.046667  | -0.13     | 0.203333  | 0.389   | 0.246667  | 0.23    | 0.0525    | 0.26      | 0.19    |
| -0.016667 | -0.406667 | 0.153333  | 0.125   | 0.073333  | 0.095   | -0.06     | 0.126667  | 0.065   |
| -0.086667 | -0.546667 | 0.35      | 0.115   | 0.33      | -0.01   | 0.3025    | 0.437333  | 0.33    |
| 0.253333  | -0.107    | 0.113333  | 0.1345  | 0.433333  | 0.03    | 0.11      | 0.110667  | -0.065  |
| -0.013333 | -0.593333 | 0.123333  | -0.07   | 0.01      | -0.11   | -0.0925   | -0.06     | 0.02    |
| -0.106667 | -0.39     | 0.123333  | 0.13    | 0.09      | 0.26    | 0.05625   | 0.148333  | 0.045   |
| -0.021333 | -0.386667 | -0.013333 | -0.09   | 0.076667  | -0.18   | 0.04      | 0.04      | 0.1     |
| -0.073333 | -0.256667 | -0.296667 | 0.03    | -0.390667 | 0.12    | -0.033333 | -0.344    | 0.035   |
| -0.16     | -0.35     | 0.05      | -0.43   | -0.06     | -0.015  | -0.1025   | -0.15     | -0.065  |
| 0.213333  | -0.006667 | 0.31      | 0.112   | 0.361333  | 0.3     | 0.16      | 0.447     | 0.31    |
| 0.2       | -0.053333 | 0.36      | 0.125   | 0.326667  | 0.38    | 0.1625    | 0.563333  | 0.26    |
| 0.046667  | -0.291333 | 0.226667  | 0.02    | -0.146667 | 0.145   | 0.076667  | 0.205     | 0.195   |
| 0.08      | -0.223333 | 0.083333  | -0.16   | 0.036667  | -0.075  | -0.06975  | -0.046333 | -0.11   |
| -0.096667 | -0.62     | -0.46     | -0.02   | -0.39     | -0.66   | -0.51     | -0.343333 | -0.2    |
| -0.073333 | -0.363333 | 0.186667  | -0.365  | -0.31     | -0.05   | 0.06      | 0.053333  | -0.105  |
| 0.01      | -0.296667 | 0.093333  | -0.16   | -0.15     | 0.085   | -0.035    | -0.02     | 0.035   |
| 0.296667  | -0.266667 | 0.226667  | -0.217  | -0.11     | 0.305   | 0.103333  | 0.400333  | 0.135   |
| -0.139    | -0.386    | -0.118    | -0.3655 | 0.196667  | -0.1485 | -0.14175  | -0.166667 | -0.795  |
| -0.051333 | 0.301667  | 0.163667  | 0.2505  | 0.15      | -0.0585 | -0.0195   | 0.121333  | -0.1405 |
| -0.27     | 0.026667  | 0.216667  | 0.085   | 0.166667  | 0.055   | 0.0075    | 0.006667  | 0.06    |
| -0.633333 | -0.386667 | -0.793333 | -0.885  | 0.37      | -0.03   | -0.395    | -1.273333 | -0.7865 |
| 0.3       | 0.15      | 0.356667  | 0.205   | 0.27      | 0.335   | 0.0375    | 0.26      | 0.145   |
| 0.457333  | -0.596667 | 0.12      | -0.265  | -0.08     | 0.205   | 0.1025    | 0.113333  | 0.21    |
| 0.076667  | 0.199333  | 0.1       | -0.24   | 0.116667  | 0.04    | 0.3175    | 0.226667  | 0.07    |
| 0.036667  | 0.06      | 0.093333  | 0.194   | 0.006667  | -0.005  | 0.0525    | 0.225     | 0.16    |

|           |           |           |         |           |         |           |           |        |
|-----------|-----------|-----------|---------|-----------|---------|-----------|-----------|--------|
| 0.21      | -0.3      | 0.093333  | 0.17    | 0.08      | 0.045   | 0.0175    | 0.126667  | 0.095  |
| 0.333333  | -0.016667 | 0.092333  | 0.255   | 0.216667  | 0.36    | -0.0325   | 0.133333  | 0.2    |
| 0.096667  | 0.216667  | -0.303333 | 0.045   | 0.15      | 0.3     | -0.059    | 0.072333  | 0.33   |
| -0.086667 | -0.01     | 0.307667  | 0.241   | 0.07      | 0.07    | 0.04      | 0.066667  | 0.205  |
| 0.22      | 0.283333  | 0.15      | 0.455   | 0.116667  | 0.195   | -0.005    | 0.043333  | 0.34   |
| -1.338    | 1.035333  | -0.670333 | 0.91    | 0.54      | 0.8145  | -1.126    | -1.701    | 0.6885 |
| -0.18     | -0.053333 | 0.013333  | 0.335   | -0.096667 | 0.075   | -0.07     | 0.062     | 0.07   |
| -0.165    | -0.7      | -0.851    | -0.219  | -0.623    | -0.235  | -0.592333 | -0.62     | -0.075 |
| 0.003333  | 0.1       | 0.04      | 0.07    | -0.396667 | -0.09   | -0.085    | -0.163333 | 0.225  |
| -0.16     | -0.14     | 0.026667  | 0.1235  | -0.107667 | -0.01   | -0.09225  | -0.038333 | 0.215  |
| 0.203333  | 0.04      | -0.04     | -0.165  | -0.016667 | 0.005   | 0.045     | 0.04      | 0.115  |
| 0.186667  | -0.04     | 0.23      | 0.22    | 0         | 0.13    | 0.2075    | 0.426667  | 0.04   |
| -0.029667 | 0.145333  | 0.091333  | 0.075   | 0.073     | 0.0605  | -0.01425  | 0.037333  | 0.0445 |
| -0.116667 | 0.433333  | 0.146667  | -0.17   | 0.16      | -0.13   | -0.1175   | -0.143333 | -0.145 |
| -0.11     | 0.073333  | 0.156667  | -0.015  | -0.193333 | 0.045   | -0.08     | -0.053333 | -0.13  |
| 0.003333  | -0.2      | -0.186667 | 0.21    | -0.4      | -0.27   | -0.245    | -0.216667 | 0.02   |
| 0.02      | -0.233333 | -0.1      | 0.134   | -0.123333 | 0.11    | 0.011     | -0.198    | 0.16   |
| 0.41      | 0.066667  | 0.16      | 0.305   | 0.056667  | 0.27    | 0.125     | 0.246667  | 0.13   |
| 0.363333  | 0.07      | 0.083333  | 0.24    | -0.036667 | 0.042   | 0.155     | -0.07     | 0.205  |
| 0.32      | 0.106667  | 0.18      | 0.185   | 0.106667  | 0.26    | 0.1       | 0.153333  | 0.24   |
| 0.486667  | 0.083333  | 0.346667  | 0.405   | 0.26      | 0.29    | 0.1475    | 0.316667  | 0.245  |
| 0.29      | 0.08      | 0.093333  | 0.355   | -0.183333 | 0.155   | 0.0425    | 0.176667  | 0.06   |
| 0.166667  | 0.076667  | -0.18     | 0.07    | -0.123333 | -0.015  | -0.2675   | -0.14     | -0.925 |
| -0.023333 | -0.013333 | 0.056667  | 0.19    | -0.116667 | -0.015  | -0.0625   | -0.083667 | -1.16  |
| -0.223333 | -0.046667 | -0.85     | 0.015   | 0.06      | -0.1945 | -0.9225   | -0.82     | -0.195 |
| -0.346667 | 0.096667  | -0.113333 | -0.25   | -0.133333 | -0.02   | -0.1775   | -0.04     | 0.155  |
| -0.036667 | -0.066667 | -0.02     | 0.005   | -0.126667 | 0.055   | -0.0875   | -0.073333 | 0.07   |
| 0.06      | 0.063333  | 0.25      | 0.265   | -0.11     | 0.08    | -0.025    | 0.09      | 0.32   |
| 0.016667  | 0.053333  | 0.15      | 0.35    | -0.193333 | 0.06    | -0.0175   | 0.066667  | -0.005 |
| 0.274     | -0.121667 | 0.191333  | 0.1405  | 0.287333  | 0.137   | 0.19425   | 0.339333  | 0.1445 |
| -0.263333 | -0.223333 | -0.27     | 0.045   | -0.093333 | -0.185  | -0.15     | -0.117667 | 0.14   |
| -0.206667 | 0.046667  | -0.173333 | -0.28   | -0.123333 | -0.145  | 0.09825   | -0.215333 | 0.09   |
| 0.206667  | 0.18      | 0.143333  | 0.305   | 0.166667  | 0.145   | 0.055     | 0.111333  | 0.035  |
| 0.366667  | 0.093333  | 0.426667  | 0.245   | 0.363333  | 0.485   | 0.305     | 0.48      | 0.365  |
| -0.006667 | -0.016667 | 0.003333  | 0.075   | -0.346667 | 0       | -0.01     | 0.03      | -0.195 |
| 0.076667  | -0.12     | 0.21      | 0.16    | -0.12     | -0.03   | 0.005     | 0.038333  | -0.105 |
| -0.263333 | -0.266667 | -0.036667 | -0.1595 | -0.053333 | -0.295  | -0.4225   | -0.473333 | -0.37  |
| 0.246667  | 0.286667  | -0.29     | -1.895  | -1.51     | -1.34   | -0.6475   | -0.233333 | -0.785 |
| 0.716667  | 1.07      | -0.233333 | -2.549  | -1.518    | -1.725  | -0.715    | -0.253333 | -1.065 |
| 1.107     | 0.72      | -0.192667 | -2.55   | -1.635    | -1.55   | -0.30725  | -0.212333 | -1.28  |
| 0.51      | 0.496667  | 0.346667  | 0.15    | 0.32      | 0.04    | 0.175     | 0.07      | -1.08  |
| -0.256667 | 0.36      | 0.026667  | -0.37   | -0.143333 | -0.075  | -0.025    | -0.216667 | -1.43  |
| 0.138667  | -0.005333 | 0.224333  | 0.251   | -0.111333 | 0.247   | 0.0285    | -0.033333 | -1.355 |
| 0.176667  | 0.123333  | 0.246667  | 0.2165  | 0.186667  | 0.16    | 0.055     | -0.153333 | -0.03  |
| 0.148333  | -0.174    | 0.202     | -0.1945 | 0.306667  | 0.0485  | 0.04475   | 0.364333  | 0.206  |
| 0.273333  | 0.186667  | 0.293333  | 0.315   | 0.16      | 0.265   | 0.19      | 0.291333  | 0.22   |
| -0.036667 | -0.174333 | -0.006    | 0.21    | 0.107     | 0.18    | -0.022    | 0.210667  | -0.41  |
| 0.133333  | -0.103333 | 0.1       | 0.165   | -0.086667 | 0.1     | -0.0075   | 0.196667  | -0.02  |
| 0.153333  | -0.032667 | 0.061333  | 0.125   | 0.123333  | 0.084   | 0.068333  | 0.271667  | 0.171  |
| 0.123333  | -0.023333 | 0.063333  | 0.425   | 0.2       | -0.1    | 0.195     | 0.131     | 0.195  |
| 0.023333  | -0.03     | 0.036667  | -0.0095 | -0.293333 | 0.05    | -0.138    | 0.096667  | 0.145  |
| 0.016667  | 0.056667  | 0.08      | 0.27    | 0.2       | 0.035   | 0.09      | 0.103333  | 0.275  |
| -1.116667 | 0.251333  | -0.396667 | 0.12    | 0.283333  | 0.015   | 0.346667  | 0.182     | -0.39  |
| 0.176667  | 0.003333  | -0.003333 | 0.21    | -0.014667 | 0.18    | 0.04      | -0.023333 | 0.15   |
| -0.37     | -3.673333 | -0.16     | -0.57   | -0.35     | -0.355  | -0.35     | -0.643333 | -0.21  |



|           |           |           |         |           |         |           |           |         |
|-----------|-----------|-----------|---------|-----------|---------|-----------|-----------|---------|
| -0.086667 | -4.003333 | -0.163333 | -0.23   | -0.093333 | -0.295  | -0.285    | -0.283333 | -0.22   |
| -0.64     | -0.103333 | -0.319667 | -1.64   | -0.496667 | -0.395  | -0.344    | -0.769    | 0.28    |
| 0.11      | -0.296667 | -0.09     | -0.28   | -0.045    | 0.105   | -0.12     | 0.140667  | -0.035  |
| 0.025     | -0.032333 | 0.056333  | 0.1315  | -0.036667 | -0.0335 | -0.019    | 0.052333  | -0.0665 |
| 0.333333  | -0.003333 | 0.235667  | -0.005  | -0.083333 | 0.105   | 0.20825   | 0.22      | 0.0035  |
| 0.18      | 0.173333  | 0.253333  | 0.1     | -0.046667 | 0.22    | -0.0185   | 0.096667  | 0.22    |
| 0.303333  | 0.76      | -1.561667 | -2.205  | -1.5      | -1.6955 | -0.70825  | -0.736    | 1.265   |
| 0.715     | 0.504667  | -0.065    | -0.92   | -0.628    | -2.096  | -0.65     | 0.23      | 1.1     |
| -1.696667 | 0.933333  | -2.19     | -2.9455 | -1.876667 | -1.875  | -1.615    | -1.663667 | 0.385   |
| -0.213333 | -2.72     | -0.276667 | -0.34   | -0.613333 | -0.41   | -0.405    | -0.746667 | -0.825  |
| 0.133333  | 0.046667  | -0.013333 | 0.0555  | 0.22      | 0.105   | -0.0215   | 0.166667  | 0.075   |
| 0.19      | 0.07      | 0.135333  | 0.31    | -0.103333 | 0.085   | 0.0325    | 0.045333  | 0.06    |
| 0.146667  | 0.156667  | 0.17      | 0.165   | 0.033333  | 0.12    | -0.025    | -0.056667 | 0.055   |
| 0.253333  | 0.193333  | 0.313333  | 0.29    | 0.2       | 0.11    | 0.135     | 0.21      | 0.105   |
| -0.083333 | -0.033333 | -0.023333 | 0.04    | -0.496333 | 0.04    | -6.94E-18 | 0.093     | 0.045   |
| -0.657333 | 0.043333  | -0.53     | -0.73   | -0.172667 | -0.695  | -0.7575   | -1.066667 | -0.26   |
| 0.094667  | 0.467     | -0.228667 | 0.1135  | -0.826667 | 0.1485  | -0.2525   | -0.467667 | -0.16   |
| -0.16     | -0.336667 | 0.11      | -0.315  | -0.166667 | -0.21   | -0.125    | 0.033333  | -0.135  |
| -1.752333 | -3.739    | -0.877    | -2.601  | -1.39     | -1.9045 | -0.97925  | -0.332333 | -1.0265 |
| 0.06      | -0.06     | -0.08     | 0.185   | -0.111    | 0       | -0.0375   | 0.026667  | 0.21    |
| 0.3       | 0.04      | 0.15      | 0.15    | 0.053333  | 0.295   | -0.0025   | 0.293333  | 0.25    |
| 0.156333  | 0.034     | -1.035333 | 0.2835  | 0.143333  | 0.0585  | -0.09475  | 0.103     | 0.046   |
| 0.187     | -0.13     | -1.619    | -0.232  | -0.053333 | 0.09    | -0.3195   | 0.013333  | 0.055   |
| -0.076667 | -0.043333 | -0.783333 | -0.111  | 0.093333  | -0.065  | -0.3045   | 0.081667  | 0.025   |
| -1.523333 | -2.436667 | -1.05     | -2.15   | -1.436667 | -1.2435 | -1.14     | -1.718667 | -0.425  |
| -1.046667 | 0.17      | -0.483333 | -1.225  | -0.61     | -0.715  | -0.156667 | -0.9485   | 0.665   |
| -0.8935   | -0.53     | -0.751667 |         | -0.8215   | -1.0285 | -0.733    | -0.337667 | -1.01   |
| 0.063333  | -0.13     | 0.396667  | 0.28    | -0.093333 | 0.14    | 0.1675    | 0.203333  | 0.21    |
| 0.276667  | -0.08     | 0.223333  | 0.12    | 0.223333  | 0.21    | 0.32      | 0.42      | 0.215   |
| -0.79     | 0.196667  | -0.45     | -1.275  | -0.673333 | -0.95   | -0.5325   | -0.866667 | -0.605  |
| -0.293333 | 0.443333  | -0.316667 | -0.545  | -0.273333 | -0.2    | -0.4375   | -0.353333 | -0.095  |
| -0.273333 | 0.543333  | -0.196667 | -0.075  | -0.346667 | -0.185  | -0.26     | -0.106667 | -0.14   |
| -0.233333 | 0.503333  | -0.143333 | -0.03   | -0.316667 | -0.185  | -0.5575   | -1.07     | -0.22   |
| -0.595667 | -1.707333 | -0.867333 | -1.1965 | -1.016667 | -0.6985 | -0.96225  | -1.210333 | -0.275  |
| -1.421333 | 0.616667  | -1.146667 | -1.185  | -0.813333 | -0.77   | -1.0675   | -1.356667 | -0.585  |
| 0.103333  | -0.333333 | -0.24     | 0       | 0.01      | -0.18   | -0.02775  | -0.342333 | -0.18   |
| 0.033333  | -0.093333 | 0.106667  | 0.3     | -0.345333 | -0.085  | 0.0885    | 0.003     | 0.075   |
| -0.333333 | 0.116667  | -0.24     | -0.12   | -0.053333 | -0.125  | -0.1575   | -0.176667 | -0.1    |
| -0.19     | 0.069667  | -0.107667 | 0.0605  | -0.056333 | 0.0635  | -0.16925  | -0.165    | 0.082   |
| -1.476667 | 0.213333  | -0.95     | 0.01    | -0.43     | -0.055  | -0.405    | -0.206667 | 0.065   |
| -0.926667 | -0.356667 | -0.386667 | -0.25   | -0.257667 | -0.155  | -0.2825   | -0.293333 | 0.05    |
| 0.186667  | -0.403333 | 0.046667  | 0.255   | 0.11      | 0.185   | 0.085     | 0.05      | 0.13    |
| 0.16      | -0.136667 | 0.284     | 0.195   | 0.096667  | 0.0885  | 0.1725    | 0.31      | 0.26    |
| 0.299     | 0.173333  | 0.336667  | 0.331   | 0.093333  | 0.385   | 0.1275    | 0.412667  | 0.287   |
| -0.12     | 0.066667  | -0.263333 | -0.03   | -0.27     | -0.075  | -0.198    | -0.101    | 0.095   |
| 0         | 0.31      | -0.196667 | -0.01   | -0.496667 | -0.21   | -0.19     | -0.306667 | -0.08   |
| 0.261667  | 0.133333  | -1.3      | -1.5295 | -0.753333 | -1.355  | -1.11     | -1.073333 | -0.76   |
| 0.709     | 0.970333  | -2.692    | -3.0705 | -1.712667 | -2.6795 | -2.02975  | -2.566667 | -1.2545 |
| 0.166667  | -0.363333 | 0.066667  | 0.135   | -0.093333 | -0.01   | -0.145    | 0.003333  | -0.055  |
| 0.241     | 0.033333  | 0.156667  | 0.115   | 0.05      | 0.12    | -0.065    | -0.176667 | 0.135   |
| 0.13      | -0.033333 | 0.2       | 0.36    | 0.096667  | 0.225   | 0.015     | 0.153333  | 0.18    |
| -0.003333 | -0.12     | 0.16      | 0.34    | 0.11      | 0.135   | 0.0625    | 0.239333  | 0.1     |
| -0.01     | -0.173333 | -0.053333 | 0.153   | -0.416667 | 0.005   | -0.24     | -0.183333 | -0.17   |
| 0.352333  | 0.030667  | 0.106667  | 0.275   | 0.04      | 0.115   | -0.23     | -0.076667 | -0.18   |
| -0.309    | 0.183333  | -0.695667 | 0.02    | -0.59     | -0.13   | -1.00725  | -1.06     | -0.47   |

|           |           |           |         |           |         |           |           |         |
|-----------|-----------|-----------|---------|-----------|---------|-----------|-----------|---------|
| 0.246667  | 0.126     | 0.253333  | 0.2035  | 0.177667  | 0.308   | 0.0725    | 0.155333  | 0.203   |
| 0.08      | -0.136667 | 0.03      | 0.095   | 0.06      | 0.265   | 0.0375    | 0.163333  | 0.235   |
| -0.47     | -0.326667 | -0.376667 | 0.0655  | 0.055333  | 0       | -0.33375  | -0.629333 | -0.295  |
| -0.563333 | 0.266667  | -0.723333 | -0.51   | -0.61     | -0.935  | -0.575    | -0.806667 | -0.365  |
| -1.22     | 0.83      | -1.876667 | -2.06   | -1.416667 | -1.565  | -1.4      | -1.656667 | -0.695  |
| -0.329667 | 0.276667  | -0.37     | -0.3015 | -0.01     | -0.08   | 0.1325    | 0.339     | 0.21    |
| 0.163333  | -0.246667 | -0.1      | 0.31    | -0.14     | 0.03    | -0.135    | 0.010667  | 0.125   |
| -0.073333 | -0.406667 | -0.113333 | -0.245  | -0.483333 | -0.275  | -0.0625   | -0.166667 | -0.175  |
| 0.126667  | -0.496667 | -0.023333 | 0.1295  | -0.207333 | -0.095  | 0.042     | 0         | -0.035  |
| 0.06      | 0.07      | 0.1       | 0.2     | 0.13      | -0.03   | -0.12     | 0.13      | -0.23   |
| -0.086667 | -0.263333 | -0.196667 | 0.1     | 0.02      | -0.05   | 0.1       | -0.022    | 0.19    |
| 0.324     | -0.2      | 0.346667  | 0.13    | 0.39      | 0.373   | 0.1925    | 0.419667  | 0.544   |
| 0.046667  | -0.09     | 0.05      | 0.01    | 0.266667  | 0.165   | 0.143333  | -0.004    | 0.025   |
| 0.315667  | -0.3465   | -0.087667 | 0.58    | 0.457333  | 0.168   | 0.185     | 0.05      | -0.0085 |
| 0.276667  | -0.126667 | 0.02      | 0.47    | 0.242     | -0.065  | 0.007     | 0.066     | -0.105  |
| -0.053333 | -0.28     | -0.253333 | -0.152  | -0.21     | 0.055   | -0.2075   | -0.07     | -0.12   |
| 0.096667  | 0.063333  | 0.343333  | 0.43    | 0.046667  | 0.16    | 0.175     | 0.191333  | 0.085   |
| 0.13      | -0.133333 | 0.019667  | 0.085   | -0.01     | 0.09    | -0.12     | -0.066667 | 0.25    |
| 0.006667  | -0.13     | 0.293333  | 0.319   | 0.023333  | 0.135   | 0.0625    | 0.103333  | 0.235   |
| -0.15     | -0.113333 | 0.02      | 0.12    | 0.113333  | 0.03    | -0.1125   | -0.003333 | 0.075   |
| 0.286667  | -0.083333 | 0.326667  | 0.285   | 0.236667  | 0.315   | 0.2075    | 0.31      | 0.5     |
| -0.053333 | -0.336667 | 0.099333  | -0.125  | -0.046667 | 0.085   | 0.03425   | 0.095     | -0.09   |
| 0.1       | -0.06     | 0.316667  | 0.18    | 0.113333  | -0.125  | 0.02      | 0.163667  | 0.085   |
| 0.09      | -0.033333 | 0.17      | 0.18    | 0.246667  | 0.345   | 0.055     | 0.216667  | 0.175   |
| -0.55     | -0.33     | 0.02      | -0.074  | 0.040333  | -0.03   | -0.23725  | -0.083667 | -0.25   |
| 0.179667  | 0.041     | 0.054667  | 0.3005  | 0.353333  | 0.1415  | 0.07325   | 0.046     | 0.218   |
| 0.086667  | -0.073333 | 0.08      | 0.165   | -0.056667 | 0.16    | -0.0675   | 0.093333  | 0.26    |
| 0.51      | 0.116667  | 0.253333  | 0.27    | 0.383333  | 0.265   | 0.19975   | 0.43      | 0.235   |
| 0.363333  | 0.17      | 0.14      | 0.6     | 0.07      | 0.485   | 0.13      | 0.35      | 0.4     |
| 0.226667  | 0.04      | 0.173333  | 0.415   | -0.053333 | 0.21    | 0.07      | 0.246667  | 0.24    |
| -0.222    | -0.446667 | -0.243667 | -0.11   | 0.42      | -0.325  | -0.18     | -0.222    | -0.003  |
| 0.079     | -0.229667 | 0.315333  | 0.0615  | 0.194     | 0.1095  | 0.2315    | 0.219667  | 0.359   |
| 0.003333  | 0.126667  | 0.02      | -0.045  | -0.1      | 0.075   | -0.0375   | 0.083333  | 0.025   |
| 0.246667  | 0.086667  | 0.176667  | 0.115   | 0.29      | 0.185   | 0.1525    | 0.243333  | 0.125   |
| 0.51      | 0.24      | 0.33      | 0.12    | 0.613333  | 0.46    | 0.2215    | 0.386667  | 0.325   |
| -0.003333 | -0.003333 | -0.036667 | -0.025  | 0.403333  | -0.185  | -0.115    | 0.02      | -0.055  |
| -0.06     | -0.01     | -0.037    | -0.02   | 0.066667  | -0.06   | -0.0325   | -0.067    | 0.09    |
| -0.258    | 0.156667  | -0.48     | -1.1965 | -0.308333 | -0.69   | -0.62125  | -0.827333 | 0.31    |
| -0.09     | -0.04     | -2.04     | -2.265  | 0.156667  | -1.885  | -1.2975   | -0.626667 | 0.18    |
| -0.01     | -0.08     | -0.12     | -0.235  | 0.196667  | 0.08    | -0.185    | 0.02      | 0.16    |
| 0.025333  | 0.022667  | -0.157667 | 0.143   | -0.023333 | -0.0175 | -0.061    | 0.004667  | 0.205   |
| 0.11      | -0.133333 | 0         | 0.1085  | 0.186667  | 0.255   | 0.07      | 0.053333  | 0.245   |
| -0.143333 | -0.39     | -0.184667 | -0.114  | -0.7      | 0.02    | 0.142333  | 0.005     | 0.105   |
| 0.25      | 0.24      | 0.363333  | 0.255   | 0.37      | 0.24    | 0.135     | 0.296667  | 0.405   |
| -0.033333 | -0.09     | 0.036667  | 0.09    | 0.22      | -0.055  | -0.17     | -0.083333 | -0.055  |
| 0.04      | -0.073333 | 0.086667  | -0.14   | -0.013333 | -0.09   | -0.246667 | -0.127    | 0.055   |
| 0.376667  | 0.196667  | 0.406667  | 0.365   | 0.476667  | 0.315   | 0.1675    | 0.255     | 0.26    |
| -0.136667 | -0.01     | 0.103333  | 0.01    | 0.31      | 0.19    | -0.1225   | -0.080667 | 0.05    |
| -0.163333 | -0.573333 | -0.186667 | 0.09    | -0.08     | -0.03   | -0.17275  | -0.003    | -0.09   |
| 0.233667  | -0.272333 | 0.151333  | -0.0125 | 0.012     | -0.114  | 0.16325   | 0.068667  | 0.148   |
| -0.023333 | 0.09      | 0.063333  | -0.435  | -0.113333 | 0.01    | 0.005     | 0.003333  | 0.07    |
| -0.11     | -0.133333 | 0.086667  | 0.165   | -0.259667 | -0.23   | -0.095    | -0.026667 | -0.03   |
| 0.046667  | -0.046667 | 0.136667  | 0.125   | -0.183333 | 0.09    | -0.035    | -0.023333 | 0.1     |
| 0.043333  | 0.236667  | 0.206667  | 0.165   | 0.085333  | 0.16    | 0.14      | 0.203333  | 0.21    |
| 0.143333  | -0.136667 | 0.233333  | 0.165   | 0.063333  | 0.18    | 0.0075    | 0.153333  | 0.335   |

|           |           |           |         |           |         |           |           |        |
|-----------|-----------|-----------|---------|-----------|---------|-----------|-----------|--------|
| 0.08      | 0.017     | -0.083333 | 0.059   | 0.263333  | -0.04   | -0.2675   | -0.21     | 0.07   |
| -0.166667 | 0.013333  | 0.163333  | 0.335   | 0.016667  | -0.235  | -0.015    | 0.203333  | -0.09  |
| 0.113333  | 0.003333  | 0.153333  | 0.215   | 0.11      | 0.25    | -0.015    | 0.18      | 0.18   |
| -0.106667 | -0.146667 | -0.096667 | -0.125  | -0.246667 | -0.14   | -0.075    | -0.236667 | -0.2   |
| 0.13      | 0.03      | 0.276667  | 0.34    | 0.283667  | 0.13    | 0.165     | 0.201667  | 0.115  |
| 0.09      | 0.076667  | 0.2       | 0.263   | 0.04      | 0.27    | 0.0225    | 0.029333  | 0.175  |
| 0.09      | 0.21      | 0.283333  | 0.225   | 0.366667  | 0.305   | 0.2025    | 0.29      | 0.39   |
| 0.08      | -0.023333 | 0.133333  | 0.175   | -0.056667 | 0.26    | -0.0265   | -0.007333 | 0.335  |
| 0.11      | 0.153333  | -0.24     | -0.08   | -0.039667 | 0.055   | -0.29525  | -0.12     | 0.23   |
| 0.213333  | -0.173333 | 0.118     | 0.195   | 0.076667  | 0.2435  | 0.0425    | 0.196667  | 0.405  |
| -1.57     | 0.14      | -0.68     | -2.355  | -1.4      | -1.345  | -0.872    | -0.56     | 0.065  |
| 0.169     | -0.49     | -0.71     | -0.532  | -0.53     | -0.54   | -0.336667 | -0.995    | -0.2   |
| 0.373333  | 0.133333  | 0.401333  | 0.34    | 0.136667  | 0.43    | 0.2475    | 0.39      | 0.44   |
| 0.043333  | -0.156667 | 0.28      | 0.16    | -0.003333 | 0.055   | 0.045     | 0.167333  | 0.27   |
| -0.068333 | -0.098    | 0.036667  | 0.018   | -0.113333 | 0.06    | -0.31525  | -0.073333 | 0.075  |
| 0.136667  | -0.046667 | 0.2       | 0.29    | 0.13      | 0.15    | -0.0025   | 0.053     | 0.17   |
| 0.113333  | 0.043333  | 0.02      | 0.17    | 0.026667  | 0.06    | -0.06425  | 0.076667  | 0.11   |
| -0.033333 | -0.393333 | -0.256667 | 0.1     | 0.323     | 0.0185  | -0.1505   | -0.1315   | 0.02   |
| 0.443333  | 0.166667  | 0.41      | 0.395   | 0.283333  | 0.395   | 0.195     | 0.366667  | 0.415  |
| 0.29      | 0.006667  | 0.176667  | 0.325   | 0.41      | 0.285   | 0.145     | 0.146667  | 0.35   |
| 0.18      | 0.15      | -0.017    | 0.3115  | 0.22      | 0.155   | -0.1445   | -0.2      | 0.3    |
| -0.576667 | 0.186667  | -0.073667 | -0.23   | -0.255667 | -0.47   | 0.19      | -0.379    | -0.015 |
| 0.173333  | -0.166667 | 0.086667  | -0.0485 | 0.456667  | 0.07    | 0.0675    | 0.063333  | 0.12   |
| -0.052333 | -0.37     | -0.19     | 0.1     | 0.38      | 0.06    | -0.118    | -0.026667 | 0.155  |
| 0.025     | -0.013    | 0.080333  | 0.051   | -0.183333 | 0.22    | 0.11875   | 0.126667  | 0.365  |
| -1.253333 | -1.863333 | -0.749    | -1.18   | -0.92     | -1.52   | -1.103333 | -0.7735   | -0.27  |
| -0.703333 | -1.193333 | -1.023333 | -1.253  | 0         | -0.643  | -0.649    | -0.608    | -0.41  |
| -0.88     | 0.28      | 0.04      | -1.78   | -0.596667 | -0.17   | -0.7925   | -0.97     | -0.395 |
| -0.353333 | -0.44     | -0.903333 | -1.005  | -0.486667 | -0.625  | -0.7625   | -0.826667 | -0.435 |
| -0.186667 | -0.133    | -0.448333 | -0.615  | 0.230667  | -0.225  | -0.149    | -0.2      | -0.285 |
| -1.43     | 0.966667  | -0.65     | -2.165  | -1.543333 | -1.62   | -1.2625   | -1.916667 | 0.73   |
| -1.656667 | 0.746667  | -0.663333 | -2.24   | -1.47     | -1.435  | -1.395    | -2.423333 | 0.17   |
| -0.21     | -0.05     | -0.23     | -0.235  | -0.24     | -0.1    | -0.7075   | -0.08     | -0.215 |
| 1.24      | 0.61      | -2.06     | -1.698  | -1.42     | -1.64   | -1.428    | -1.742333 | -0.8   |
| 0.043333  | -0.326667 | -0.412667 | -0.06   | -0.996667 | -0.1    | -0.23     | -0.118    | -0.04  |
| 0.206667  | 0.04      | -0.236667 | -0.03   | -0.173333 | 0.135   | -0.265    | -0.147333 | -0.045 |
| 0.096667  | -0.186667 | 0.13      | 0.07    | -0.16     | 0.145   | 0.055     | 0.06      | 0.11   |
| 0.31      | 0.05      | 0.31      | 0.32    | 0.42      | 0.29    | 0.2475    | 0.342     | 0.4    |
| -0.136667 | 0.033333  | -0.03     | -0.03   | -0.026667 | 0.12    | 0.0225    | 0.066667  | 0.07   |
| -0.715667 | -0.41     | -0.716667 | -0.421  | 0.263667  | -0.955  | -0.419333 | -0.304    | -0.52  |
| -0.15     | -0.003333 | 0.16      | -0.14   | -0.283333 | 0.06    | 0.015     | -0.016667 | -0.23  |
| -0.119    | 0.136333  | -0.097667 | -0.4545 | 0.053333  | -0.0865 | -0.10925  | -0.128667 | -0.183 |
| 0.096667  | -0.236    | 0.043333  | -0.005  | -0.103333 | -0.155  | -0.05     | 0.075     | -0.145 |
| 0.149667  | -0.097    | 0.19      | 0.046   | 0.2       | 0.209   | 0.03975   | 0.122333  | 0.0535 |
| 0.122667  | -0.080333 | 0.066333  | -0.1255 | -0.038333 | -0.04   | -0.115    | -0.693333 | 0.09   |
| -2.452333 | 1.352667  | -0.903333 | 1.003   | 0.914333  | 0.5875  | 0.0305    | -0.188333 | -1.157 |
| -1.766667 | 0.79      | -1.17     | 0.665   | 0.713333  | 0.67    | 0.0775    | -0.166667 | -1.005 |
| -1.123333 | -0.609667 | -1.05     | -0.97   | 0.155333  | -0.55   | -0.8975   | -1.144    | -0.55  |
| 0.73      | 1.073333  | -0.423333 | 0.61    | 1.04      | 0.85    | 0.5695    | 0.755     | 0.915  |
| -0.606667 | -2.793333 | -2.171    | -2.67   | -2.02     | -1.99   | -1.865    | -2.189    | -0.54  |
| -0.181    | -2.633333 | -2.324    | -2.6795 | -1.756333 | -1.755  | -1.76075  | -2.398    | -0.715 |
| 0.413333  | 0.146667  | 0.393333  | 0.18    | 0.106667  | 0.345   | 0.215     | 0.37      | 0.295  |
| 0.09      | 0.076667  | 0.27      | 0.17    | 0.46      | 0.345   | 0.265     | 0.47      | 0.295  |
| 0.163333  | -0.1      | -0.14     | 0.0945  | 0.03      | -0.02   | 0.1325    | 0.126667  | 0.3    |
| -0.156667 | -0.06     | 0.136667  | -0.0245 | -1.85E-17 | -0.15   | 0.1215    | 0.213667  | 0.22   |

|           |           |           |         |           |         |           |           |         |
|-----------|-----------|-----------|---------|-----------|---------|-----------|-----------|---------|
| -0.093333 | -0.32     | -0.256667 | -0.13   | -0.38     | -0.685  | -0.203333 | -0.415    | -0.3    |
| 0.353333  | -0.09     | 0.29      | 0.01    | 0.18      | 0.2     | 0.245     | 0.407     | 0.24    |
| 0.28      | -0.11     | 0.053333  | -0.455  | 0.183333  | 0.27    | 0.0825    | 0.283333  | 0.29    |
| 0.12      | 0.16      | 0.2       | 0.42    | -0.166667 | 0.19    | 0.0875    | -0.01     | 0.2     |
| 0.25      | -0.046667 | 0.27      | 0.335   | 0.32      | 0.38    | 0.1325    | 0.077667  | 0.315   |
| 0.193333  | 0.131667  | 0.09      | 0.028   | 0.026667  | 0.345   | 0.11175   | 0.163333  | 0.46    |
| 0.244     | -0.26     | -0.04     | 0.125   | 0.32      | 0.235   | -0.093    | 0.285     | 0.5     |
| -0.316667 | -0.166667 | 0.133333  | -0.1955 | 0.1       | 0.06    | 0.1015    | 0.09      | 0.155   |
| 0.263333  | 0.146667  | 0.286667  | 0.255   | 0.203333  | 0.21    | 0.235     | 0.346667  | 0.36    |
| 0.03      | -0.023333 | -0.103333 | 0.193   | -0.625333 | -0.25   | -0.24     | -0.23     | -0.085  |
| 0.214667  | 0.103667  | 0.318667  | 0.19    | 0.232     | 0.2965  | 0.0985    | 0.136333  | 0.3505  |
| -0.023333 | -0.003333 | 0.113333  | 0.3465  | -0.02     | 0.155   | 0.0575    | -0.01     | 0.11    |
| 0.233333  | -0.07     | 0.19      | 0.165   | 0.16      | 0.075   | -0.01     | -0.003333 | 0.185   |
| 0.333333  | 0.153333  | 0.223667  | 0.25    | -0.16     | 0.205   | 0.0225    | 0.083333  | 0.3     |
| -0.386333 | -0.353333 | -0.516667 | 0.091   | -0.3445   | -0.295  | -0.193333 | 0.0165    | -0.24   |
| 0.096667  | -0.266667 | -0.443333 | 0.05    | -0.144667 | -0.12   | -0.203333 | -0.441    | -0.105  |
| -0.166667 | -0.19     | -0.046667 | -0.095  | -0.223333 | 0.043   | -0.045    | 0.052667  | 0.02    |
| -0.046667 | -0.14     | -0.253333 | 0.2925  | 0.153333  | -0.105  | -0.05     | -0.053333 | 0.145   |
| -0.083333 | -0.063333 | 0.036667  | 0.155   | 0.006667  | 0.185   | -0.05     | 0.015667  | 0.05    |
| -0.65     | 0.093333  | -0.256333 | -0.705  | 0.016667  | -0.4715 | -0.535    | -0.686667 | -0.4    |
| -0.23     | 0.33      | 0.05      | -0.275  | 0.076667  | -0.23   | -0.2775   | -0.356667 | -0.15   |
| -0.043    | 0.061     | 0.118333  | 0.086   | -0.059    | -0.0525 | -0.11375  | -0.091333 | -0.1335 |
| 0.173333  | 0.093333  | 0.38      | 0.005   | 0.286667  | 0.1985  | 0.175     | 0.306     | 0.255   |
| 0.24      | 0.206667  | 0.336667  | 0.325   | 0.406667  | 0.19    | 0.2       | 0.426667  | 0.27    |
| 0.092667  | 0.19      | -0.007667 | 0.2955  | 0.461333  | 0.206   | 0.16675   | 0         | 0.2225  |
| 0.249     | -0.333333 | 0.232333  | 0.4075  | 0.745667  | 0.305   | 0.263333  | 0.247667  | 0.725   |
| 0.1       | 0.003333  | 0.253333  | 0.095   | 0.18      | 0.165   | 0.2825    | 0.272333  | 0.575   |
| 0.133333  | 0.026667  | 0.213333  | 0.1645  | -0.183333 | 0.175   | 0.0775    | 0.24      | 0.21    |
| 0.22      | -0.147667 | 0.21      | 0.0195  | 0.278     | 0.117   | 0.10625   | 0.427333  | 0.261   |
| 0.113333  | -0.11     | 0.036667  | 0.04    | -0.026667 | 0.115   | 0.05      | 0.073333  | 0.09    |
| 0.15      | 0.143333  | 0.026667  | 0.25    | 0.403333  | 0.115   | 0.194     | 0.113333  | 0.275   |
| 0.133333  | 0.053333  | 0.15      | 0.0925  | 0.11      | 0.125   | 0.15      | 0.061     | 0.11    |
| -0.263333 | -0.236667 | 0.056667  | -0.07   | -0.23     | 0       | -0.1925   | -0.12     | -0.14   |
| 0.166667  | -0.35     | 0.07      | -0.135  | -0.403333 | 0.195   | 0.1405    | 0.146667  | -0.33   |
| 0.159667  | 0.000667  | 0.126     | 0.186   | -0.083333 | 0.07    | 0.0565    | 0.132667  | 0.2     |
| 0.307     | 0.050667  | 0.277667  | 0.493   | 0.998333  | 0.525   | 0.24125   | 0.372667  | 0.41    |
| 0.723333  | 0.603333  | -0.723333 | 0.8995  | 0.653333  | 0.62    | -0.515    | -0.77     | -0.87   |
| 0.623333  | 0.19      | 0.203333  | 0.68    | -0.059333 | 0.465   | 0.236667  | 0.03      | 0.15    |
| 0.18      | -0.08     | 0.44      | 0.305   | 0.313333  | 0.355   | 0.1025    | 0.396667  | 0.075   |
| 0.02      | 0.286667  | 0.046667  | 0.205   | -0.063333 | 0.035   | 0.015     | 0.021333  | 0.04    |
| 0.050667  | -0.044    | 0.055     | 0.3945  | -0.065333 | 0.0975  | -0.16475  | -0.034    | 0.362   |
| 0.163333  | 0.14      | 0.356667  | 0.24    | 0.316667  | 0.29    | 0.2005    | 0.339     | 0.375   |
| -0.026667 | -0.18     | 0.29      | 0.28    | 0.453333  | 0.09    | 0.04      | 0.032667  | 0.055   |
| 0.096667  | 0.05      | 0.5       | -0.015  | 0.173333  | 0.285   | 0.1675    | 0.307667  | 0.25    |
| -0.1      | 0.556667  | -0.763333 | -1.215  | -0.23     | -0.26   | -0.705    | -0.63     | -0.615  |
| -0.916667 | -0.251333 | -0.660667 | -0.344  | -0.249333 | -1.37   | -0.69825  | -1.520667 | -1.155  |
| -0.42     | -0.223333 | -0.073333 | -0.02   | 0.113333  | 0.325   | 0.0105    | 0.11      | 0.1     |
| -1.093333 | -1.750333 | -0.906667 | -0.97   | -1.49     | -1.535  | -0.99325  | -0.99     | -0.82   |
| -0.78     | 0.465     | -1.245333 | 0.702   | 0.065667  | -0.605  | -0.154333 | 0.451667  | -1.825  |
| -0.732    | -0.146667 | -0.645667 | -0.22   | -0.539667 | -0.335  | -0.591667 | -0.98     | -1.235  |
