# Supplementary material
Source: PubMed Central journal article supplement (PMC133449)
Supplement: gb-2002-3-11-research0065-s9.pdf [file gb-2002-3-11-research0065-s9.pdf]

| UID     | NAME      | GWEIGHT | SS1 | G50 | 314 | H34 | J99 | AR32 |
|---------|-----------|---------|-----|-----|-----|-----|-----|------|
| EWEIGHT |           |         |     | 1   | 1   | 1   | 1   | 1    |
| HPY0001 | 14249 HPC | 1       | 1   | 1   | 1   | 1   | 1   | 1    |
| HPY0002 | 14250 HPC | 1       | 0   | 1   | 1   | 0   | 1   | 1    |
| HPY0003 | 14251 HPC | 1       |     | 0   | 0   | 0   | 1   | 0    |
| HPY0004 | 14252 HPC | 1       | 1   | 1   | 1   | 1   | 1   | 1    |
| HPY0005 | 14253 HPC | 1       | 1   | 1   | 1   | 1   | 1   | 1    |
| HPY0006 | 14254 HPC | 1       | 1   | 1   | 1   | 1   | 0   | 1    |
| HPY0007 | 14255 HPC | 1       | 1   | 1   | 0   | 1   | 1   | 0    |
| HPY0009 | 14257 HPC | 1       | -1  | 1   | 1   | 1   | 1   | 1    |
| HPY0010 | 14258 HPC | 1       | 1   | 1   | 1   | 1   | 1   | 1    |
| HPY0012 | 14260 HPC | 1       | 1   | 1   | 1   | 1   | 1   | 1    |
| HPY0013 | 14261 HPC | 1       | 1   | 1   | 1   | 1   | 1   | 1    |
| HPY0014 | 14262 HPC | 1       | 1   | 1   | 1   | 1   | 1   | 1    |
| HPY0015 | 14293 HPC | 1       | 1   | 1   | 1   | 1   | 1   | 1    |
| HPY0016 | 14294 HPC | 1       | 1   | 1   | 1   | 1   | 1   | 1    |
| HPY0017 | 14295 HPC | 1       | 0   | 1   | 1   | 1   | 1   | 1    |
| HPY0018 | 14296 HPC | 1       | 1   | 1   | 1   | 1   | 1   | 1    |
| HPY0019 | 14297 HPC | 1       | 1   | 1   | 1   | 1   | 1   | 1    |
| HPY0020 | 14298 HPC | 1       | 1   | 1   | 1   | 1   | 1   | 1    |
| HPY0021 | 14299 HPC | 1       | 1   | 1   | 1   | 1   | 0   | 1    |
| HPY0022 | 14300 HPC | 1       | 1   | 1   | 0   | 1   | 1   | 0    |
| HPY0023 | 14301 HPC | 1       | 0   | 0   | 0   | 0   | 0   | 0    |
| HPY0024 | 14302 HPC | 1       | 1   | 1   | 1   | 1   | 0   | 1    |
| HPY0025 | 14303 HPC | 1       | 1   | 0   | -1  | 1   | -1  | -1   |
| HPY0026 | 14304 HPC | 1       | 1   | 1   | 1   | 1   | 1   | 1    |
| HPY0027 | 14305 HPC | 1       | 1   | 1   | 1   | 1   | 1   | 1    |
| HPY0028 | 14306 HPC | 1       | 1   | 1   | 1   | 1   | 1   | 1    |
| HPY0029 | 14307 HPC | 1       | 1   | 1   | 1   | 1   | 1   | 1    |
| HPY0030 | 14308 HPC | 1       | -1  | 0   | 0   | -1  | -1  | 1    |
| HPY0031 | 14309 HPC | 1       | 1   | 1   | 1   | 1   | 1   | 1    |
| HPY0032 | 14310 HPC | 1       | 1   | 1   | 1   | 1   | -1  | -1   |
| HPY0033 | 14311 HPC | 1       | 1   | 1   | 1   | 1   | 1   | 1    |
| HPY0034 | 14312 HPC | 1       | 0   | 1   | 1   | 0   | 1   | 1    |
| HPY0035 | 14313 HPC | 1       | 0   | 1   | 1   | 1   | 1   | 1    |
| HPY0036 | 14314 HPC | 1       | 1   | 1   | 1   | 1   | 1   | 1    |
| HPY0037 | 14315 HPC | 1       | 1   | 1   | 1   | 1   | 1   | 1    |
| HPY0038 | 14316 HPC | 1       | 1   | 1   | 1   | 1   | 1   | 1    |
| HPY0039 | 14317 HPC | 1       | 1   | 1   | 0   | 1   | 1   | 1    |
| HPY0040 | 14318 HPC | 1       | 1   | 1   | 1   | 1   | 1   | 1    |
| HPY0041 | 14319 HPC | 1       | 1   | 1   | 1   | 1   | 1   | 1    |
| HPY0042 | 14320 HPC | 1       | 1   | 1   | 1   | 1   | 1   | 0    |
| HPY0043 | 14321 HPC | 1       | 1   | 1   | 1   | 1   | 1   | 1    |
| HPY0044 | 14322 HPC | 1       | 1   | 1   | 1   | 1   | 1   | 1    |
| HPY0045 | 14323 HPC | 1       | 1   | 1   | 1   | 1   | 1   | 1    |
| HPY0047 | 14325 HPC | 1       | 1   | 1   | 1   | 0   | 1   | 1    |
| HPY0048 | 14326 HPC | 1       | 0   | 1   | 0   | 1   | 1   | 0    |
| HPY1778 | 16056 HPC | 1       | 1   | 1   | 1   | 1   | 1   | 1    |
| HPY0050 | 14328 HPC | 1       | 0   | 1   | 1   | 1   | 0   | 1    |
| HPY0051 | 14329 HPC | 1       | 1   | 1   | 1   | 1   | -1  | -1   |
| HPY0052 | 14330 HPC | 1       | -1  | 1   | 1   | 1   | -1  | -1   |
| HPY0053 | 14331 HPC | 1       | -1  | 0   | -1  | -1  | -1  | 1    |
| HPY0054 | 14332 HPC | 1       | -1  | -1  | -1  | -1  | -1  | 1    |
| HPY1591 | 15869 JHF | 1       | -1  | 0   | 1   | 0   | 1   | 0    |
| HPY1743 | 16021 JHF | 1       | -1  | 1   | 1   | 1   | 1   | 1    |

|         |       |     |   |    |    |    |    |    |    |
|---------|-------|-----|---|----|----|----|----|----|----|
| HPY1593 | 15871 | JHF | 1 | -1 | 1  | 1  | 1  | 1  | 1  |
| HPY0055 | 14333 | HPC | 1 | 1  | 1  | 1  | 1  | 1  | 1  |
| HPY1759 | 16037 | HPC | 1 | 1  | 1  | 1  | 0  | 1  | 1  |
| HPY0057 | 14335 | HPC | 1 | 1  | 0  | 0  | 0  | 0  | 0  |
| HPY0058 | 14336 | HPC | 1 | 1  | 1  | 1  | 0  | 0  | 0  |
| HPY0059 | 14337 | HPC | 1 | 0  | 1  | 1  | 1  | -1 | 0  |
| HPY0060 | 14338 | HPC | 1 | 0  | 0  | 1  | 0  | -1 | -1 |
| HPY0061 | 14339 | HPC | 1 | 1  | 1  | 0  | 1  | 0  | 0  |
| HPY0062 | 14340 | HPC | 1 | -1 | 1  | 0  | 1  | 1  | 0  |
| HPY0063 | 14341 | HPC | 1 | 1  | 1  | 1  | 0  | -1 | 0  |
| HPY1688 | 15966 | HPC | 1 | 1  | 0  | 0  | 1  | -1 | 0  |
| HPY0065 | 14343 | HPC | 1 | 1  | 1  | 1  | 1  | -1 | 0  |
| HPY0066 | 14344 | HPC | 1 | 1  | 1  | 1  | 0  | -1 | 0  |
| HPY0067 | 14345 | HPC | 1 | 1  | 1  | 1  | -1 | 1  | 1  |
| HPY0068 | 14346 | HPC | 1 | 1  | 1  | 1  | 1  | 1  | 1  |
| HPY0069 | 14347 | HPC | 1 | 1  | 1  | 1  | 0  | 1  | 1  |
| HPY0070 | 14348 | HPC | 1 | 1  | 1  | 1  | 1  | 1  | 1  |
| HPY1699 | 15977 | HPC | 1 | 1  | 1  | 1  | 1  | 1  | 1  |
| HPY1729 | 16007 | HPC | 1 | 1  | 1  | 1  | 1  | 1  | 1  |
| HPY0073 | 14351 | HPC | 1 | 1  | 1  | 1  | 1  | 1  | 1  |
| HPY0074 | 14352 | HPC | 1 | 1  | 1  | 1  | 1  | 1  | 1  |
| HPY0075 | 14353 | HPC | 1 | 1  | 1  | 1  | 1  | 1  | 1  |
| HPY0076 | 14354 | HPC | 1 | 1  | 1  | 1  | 1  | 1  | 1  |
| HPY0077 | 14355 | HPC | 1 | 1  | 1  | 1  | 1  | 1  | 1  |
| HPY0078 | 14356 | HPC | 1 | 1  | 0  | 0  | 1  | 1  | 1  |
| HPY0079 | 14357 | HPC | 1 | 1  | 0  | 0  | 1  | -1 | 1  |
| HPY1804 | 16082 | HPC | 1 | 1  | 1  | 1  | 1  | 0  | 0  |
| HPY0081 | 14359 | HPC | 1 |    | 0  | 0  | -1 | -1 | -1 |
| HPY0082 | 14360 | HPC | 1 | 1  | 1  | 1  | 1  | 1  | 1  |
| HPY0083 | 14361 | HPC | 1 | 1  | 1  | 1  | 1  | 1  | 1  |
| HPY0084 | 14362 | HPC | 1 | 1  | 1  | 1  | 1  | 1  | 1  |
| HPY0085 | 14363 | HPC | 1 | 1  | 1  | 1  | 1  | 1  | 0  |
| HPY0086 | 14364 | HPC | 1 | 1  | 1  | 1  | 1  | 1  | 1  |
| HPY0087 | 14365 | HPC | 1 | 1  | 1  | 1  | 1  | 1  | 1  |
| HPY0088 | 14366 | HPC | 1 | 1  | 1  | 1  | 1  | 1  | 1  |
| HPY0089 | 14367 | HPC | 1 | 1  | 1  | 1  | 1  | 1  | 1  |
| HPY0090 | 14368 | HPC | 1 | 1  | 1  | 1  | 1  | 1  | 1  |
| HPY0091 | 14369 | HPC | 1 | 1  | -1 | -1 | -1 | 1  | -1 |
| HPY0093 | 14371 | HPC | 1 | 1  | 1  | 0  | 0  | 1  | 1  |
| HPY0094 | 14372 | HPC | 1 | 1  | 1  | 0  | 0  | 1  | 1  |
| HPY0095 | 14373 | HPC | 1 | 1  | 1  | 1  | 1  | 1  | 1  |
| HPY0096 | 14374 | HPC | 1 | 0  | 1  | 0  | 1  | 1  | 1  |
| HPY0097 | 14375 | HPC | 1 | 1  | 1  | 1  | 1  | 0  | 1  |
| HPY0098 | 14376 | HPC | 1 | 1  | 1  | 1  | 1  | 1  |    |
| HPY0099 | 14377 | HPC | 1 | 1  | 1  | 1  | 1  | 1  | 1  |
| HPY0100 | 14378 | HPC | 1 | 1  | 1  | 1  | 1  | 1  | 1  |
| HPY0101 | 14379 | HPC | 1 | 0  | 1  | 1  | 1  | 1  | 1  |
| HPY1695 | 15973 | HPC | 1 | 1  | 1  | 1  | 0  | 1  | 1  |
| HPY1774 | 16052 | HPC | 1 | 0  | 1  | 1  | 1  | 1  | 1  |
| HPY0104 | 14382 | HPC | 1 | 1  | 1  | 1  | 1  | 1  | 1  |
| HPY0105 | 14383 | HPC | 1 | 1  | 1  | 1  | 1  | 1  | 1  |
| HPY0106 | 14384 | HPC | 1 | 1  | 1  | 1  | 1  | 1  | 1  |
| HPY0107 | 14385 | HPC | 1 | 1  | 1  | 1  | 1  | 1  | 1  |
| HPY0109 | 14387 | HPC | 1 | 1  | 1  | 1  | 1  | 1  | 1  |
| HPY0110 | 14388 | HPC | 1 | 1  | 1  | 1  | 1  | 1  | 1  |

|         |           |   |    |   |   |    |    |    |
|---------|-----------|---|----|---|---|----|----|----|
| HPY0111 | 14389 HPC | 1 | 1  | 1 | 0 | 1  | 1  | 0  |
| HPY0112 | 14390 HPC | 1 | 1  | 1 | 1 | 1  | 1  | 1  |
| HPY0113 | 14391 HPC | 1 | 1  | 1 | 1 | 1  | 1  | 0  |
| HPY1793 | 16071 HPC | 1 | 1  | 1 | 1 | 1  | 1  | 1  |
| HPY0115 | 14393 HPC | 1 | 1  | 1 | 1 | 1  | 1  | 1  |
| HPY0116 | 14394 HPC | 1 | 1  | 1 | 1 | 1  | 1  | 1  |
| HPY0117 | 14395 HPC | 1 | 1  | 1 | 1 | 1  | 1  | 1  |
| HPY0118 | 14396 HPC | 1 | 0  | 1 | 0 | 0  | 0  | 1  |
| HPY1783 | 16061 HPC | 1 | 1  | 1 | 1 | 1  | 1  | 0  |
| HPY0120 | 14398 HPC | 1 | 0  | 1 | 1 | 1  | 1  | -1 |
| HPY0121 | 14399 HPC | 1 | 1  | 1 | 1 | 1  | 1  | 0  |
| HPY0122 | 14400 HPC | 1 | 1  | 1 | 1 | 1  | 1  | 1  |
| HPY0123 | 14401 HPC | 1 | 1  | 1 | 1 | 1  | 1  | 1  |
| HPY0124 | 14402 HPC | 1 | 1  | 1 | 1 | 1  | 1  | 1  |
| HPY0125 | 14403 HPC | 1 | 1  | 1 | 1 | 1  | 1  | 0  |
| HPY0126 | 14404 HPC | 1 | 0  | 1 | 1 | 0  | 1  | 1  |
| HPY0127 | 14405 HPC | 1 | 1  | 1 | 1 | 1  | 1  | 1  |
| HPY0128 | 14406 HPC | 1 |    | 1 | 1 | 1  | -1 | 0  |
| HPY0129 | 14407 HPC | 1 | 1  | 1 | 1 | 1  | 0  | 1  |
| HPY0130 | 14408 HPC | 1 | 1  | 1 | 1 | 1  | 1  | 1  |
| HPY0132 | 14410 HPC | 1 | 1  | 1 | 1 | 1  | 1  | 1  |
| HPY0133 | 14411 HPC | 1 | 1  | 1 | 1 | 1  | 1  | 1  |
| HPY0134 | 14412 HPC | 1 | 1  | 1 | 1 | 1  | 1  | 1  |
| HPY0135 | 14413 HPC | 1 | 0  | 1 | 1 | 1  | 1  | 1  |
| HPY0136 | 14414 HPC | 1 | 1  | 1 | 1 | 1  | 1  | 1  |
| HPY0137 | 14415 HPC | 1 | 1  | 1 | 1 | 1  | 1  | 1  |
| HPY0138 | 14416 HPC | 1 | 1  | 1 | 1 | 1  | 1  | 1  |
| HPY0139 | 14417 HPC | 1 | 1  | 1 | 1 | 1  | 1  | 1  |
| HPY0140 | 14418 HPC | 1 | 1  | 1 | 1 | 1  | 1  | 1  |
| HPY0141 | 14419 HPC | 1 | 1  | 1 | 1 | 1  | 1  | 1  |
| HPY0142 | 14420 HPC | 1 | 1  | 1 | 1 | 1  | 1  | 1  |
| HPY0143 | 14421 HPC | 1 | 1  | 1 | 1 | 1  | 1  | 1  |
| HPY0144 | 14422 HPC | 1 | 0  | 1 | 0 | -1 |    | 0  |
| HPY0145 | 14423 HPC | 1 | 1  | 1 | 1 | 1  | 1  | 1  |
| HPY0146 | 14424 HPC | 1 | 1  | 0 | 0 | 1  | 1  | 1  |
| HPY0147 | 14425 HPC | 1 | 1  | 1 | 1 | 1  | 1  | 1  |
| HPY0148 | 14426 HPC | 1 | 1  | 1 | 1 | 1  | 1  | 1  |
| HPY0149 | 14427 HPC | 1 | 1  | 1 | 1 | 1  | 1  | 1  |
| HPY0150 | 14428 HPC | 1 | 1  | 1 | 1 | 1  | 1  | 1  |
| HPY0151 | 14429 HPC | 1 | 1  | 1 | 1 | 1  | 1  | 1  |
| HPY0152 | 14430 HPC | 1 | 1  | 1 | 1 | 1  | 1  | 1  |
| HPY0153 | 14431 HPC | 1 | 1  | 1 | 1 | 1  | 1  | 1  |
| HPY0154 | 14432 HPC | 1 | 1  | 1 | 1 | 1  | 1  | 1  |
| HPY0155 | 14433 HPC | 1 | 1  | 1 | 1 | 1  | 1  | 1  |
| HPY0156 | 14434 HPC | 1 | 0  | 1 | 1 | 1  | 1  | 1  |
| HPY0157 | 14435 HPC | 1 | 1  | 1 | 1 | 1  | 1  | 1  |
| HPY0158 | 14436 HPC | 1 | 1  | 1 | 1 | 1  | 1  | 1  |
| HPY0159 | 14437 HPC | 1 | 0  | 1 | 1 | 1  | 0  | 0  |
| HPY0160 | 14438 HPC | 1 | 0  | 1 | 1 | 1  | 0  | 0  |
| HPY0161 | 14439 HPC | 1 | -1 | 1 | 0 | 1  | -1 | -1 |
| HPY0162 | 14440 HPC | 1 | 1  | 1 | 1 | 1  | 1  | 1  |
| HPY0163 | 14441 HPC | 1 | 1  | 1 | 1 | 1  | 1  | 1  |
| HPY0164 | 14442 HPC | 1 | 1  | 1 | 1 | 1  | 1  | 1  |
| HPY0165 | 14443 HPC | 1 | 1  | 1 | 1 | 1  | 1  | 1  |
| HPY0166 | 14444 HPC | 1 | 1  | 1 | 1 | 1  | 1  | 1  |

|         |           |   |    |    |    |    |   |    |
|---------|-----------|---|----|----|----|----|---|----|
| HPY0167 | 14445 HPC | 1 | 1  | 1  | 1  | 1  | 0 | 1  |
| HPY0168 | 14446 HPC | 1 | 1  | -1 | -1 | 1  | 0 | -1 |
| HPY0169 | 14447 HPC | 1 | 1  | 1  | 1  | 1  | 1 | 1  |
| HPY0170 | 14448 HPC | 1 | 1  | 1  | 1  | 1  | 1 | 1  |
| HPY0171 | 14449 HPC | 1 | 1  | 1  | 1  | 1  | 1 | 1  |
| HPY0172 | 14450 HPC | 1 | 1  | 1  | 1  | 1  | 1 | 1  |
| HPY0173 | 14451 HPC | 1 | 1  | 1  | 1  | 1  | 1 | 1  |
| HPY0174 | 14452 HPC | 1 | 1  | 0  | 1  | 1  | 1 | 1  |
| HPY0175 | 14453 HPC | 1 | 1  | 1  | 1  | 1  | 1 | 1  |
| HPY0176 | 14454 HPC | 1 | 0  | 1  | 1  | 1  | 1 | 1  |
| HPY0177 | 14455 HPC | 1 | 1  | 1  | 1  | 1  | 1 | 1  |
| HPY1594 | 15872 JHF | 1 | -1 | -1 | -1 | -1 | 1 | -1 |
| HPY1595 | 15873 JHF | 1 | -1 | -1 | -1 | -1 | 1 | -1 |
| HPY0178 | 14456 HPC | 1 | 1  | 1  | 0  | 1  | 1 | 1  |
| HPY0179 | 14457 HPC | 1 | 1  | 1  | 1  | 1  | 1 | 1  |
| HPY1796 | 16074 HPC | 1 | 1  | 1  | 1  | 1  | 0 | 1  |
| HPY0181 | 14459 HPC | 1 | 1  | 1  | 1  | 1  | 0 | 1  |
| HPY0182 | 14460 HPC | 1 | 1  | 1  | 1  | 1  | 1 | 1  |
| HPY0183 | 14461 HPC | 1 | 1  | 1  | 1  | 1  | 1 | 1  |
| HPY0184 | 14462 HPC | 1 | 1  | 1  | 0  | 1  | 1 | 1  |
| HPY0185 | 14463 HPC | 1 | 1  | 1  | 1  | 1  | 1 | 1  |
| HPY0186 | 14464 HPC | 1 | 0  | -1 | -1 | 1  | 1 | 1  |
| HPY0187 | 14465 HPC | 1 | 1  | -1 | -1 | 1  | 0 | 1  |
| HPY0188 | 14466 HPC | 1 | -1 | -1 | -1 | 1  | 1 | 0  |
| HPY0189 | 14467 HPC | 1 | 1  | 1  | 1  | 1  | 1 | 1  |
| HPY0190 | 14468 HPC | 1 | 1  | 1  | 1  | 1  | 1 | 1  |
| HPY0191 | 14469 HPC | 1 | 1  | 1  | 1  | 1  | 1 | 1  |
| HPY0192 | 14470 HPC | 1 | 1  | 1  | 1  | 1  | 1 | 1  |
| HPY0193 | 14471 HPC | 1 | 1  | 1  | 1  | 1  | 1 | 1  |
| HPY0194 | 14472 HPC | 1 | 1  | 1  | 1  | 1  | 1 | 1  |
| HPY0195 | 14473 HPC | 1 | 1  | 1  | 1  | 1  | 1 | 1  |
| HPY0196 | 14474 HPC | 1 | 1  | 1  | 1  | 1  | 1 | 1  |
| HPY0197 | 14475 HPC | 1 | 1  | 1  | 1  | 1  | 1 | 1  |
| HPY0198 | 14476 HPC | 1 | 1  | 1  | 1  | 1  | 1 | 1  |
| HPY0199 | 14477 HPC | 1 | 1  | 1  | 1  | 1  | 1 | 1  |
| HPY0200 | 14478 HPC | 1 | 1  | 1  | 0  | 1  | 0 | 1  |
| HPY0201 | 14479 HPC | 1 | 1  | 1  | 1  | 1  | 1 | 1  |
| HPY0202 | 14480 HPC | 1 | 1  | 1  | 1  | 1  | 1 | 1  |
| HPY0203 | 14481 HPC | 1 | 0  | 1  | 1  | -1 | 1 | 1  |
| HPY0204 | 14482 HPC | 1 | 1  | 1  | 1  | 1  | 0 | 1  |
| HPY1800 | 16078 HPC | 1 | 0  | 0  | 0  | 0  | 0 | 0  |
| HPY0206 | 14484 HPC | 1 | 1  | 1  | 1  | 1  | 0 | 0  |
| HPY0207 | 14485 HPC | 1 | 1  | 1  | 1  | 1  | 1 | 1  |
| HPY0208 | 14486 HPC | 1 | 0  | 1  | 1  | 0  | 1 | 0  |
| HPY0209 | 14487 HPC | 1 | 1  | 1  | 0  | 1  | 0 | 0  |
| HPY0210 | 14488 HPC | 1 | 1  | 1  | 1  | 1  | 1 | 1  |
| HPY1685 | 15963 HPC | 1 | 0  | 1  | 1  | 1  | 1 | 0  |
| HPY0212 | 14490 HPC | 1 | 1  | 1  | 1  | 0  | 1 | 1  |
| HPY0213 | 14491 HPC | 1 | 1  | 1  | 1  | 1  | 1 | 1  |
| HPY0214 | 14492 HPC | 1 | 1  | 1  | 1  | 1  | 1 | 1  |
| HPY0215 | 14493 HPC | 1 | 1  | 1  | 1  | 1  | 1 | 0  |
| HPY0216 | 14494 HPC | 1 | 1  | 1  | 0  | 1  | 1 | 1  |
| HPY0217 | 14495 HPC | 1 | 1  | -1 | -1 | -1 | 0 | 1  |
| HPY0218 | 14496 HPC | 1 | 1  | 1  | 1  | 1  | 1 | 0  |
| HPY0219 | 14497 HPC | 1 | 1  | 1  | 1  | 1  | 1 | 1  |

|         |           |   |    |    |    |   |    |    |
|---------|-----------|---|----|----|----|---|----|----|
| HPY0220 | 14498 HPC | 1 | 1  | 1  | 1  | 1 | 1  | 1  |
| HPY1711 | 15989 HPC | 1 | 1  | 1  | 1  | 1 | 1  | 1  |
| HPY0222 | 14500 HPC | 1 | 1  | 1  | 1  | 1 | 1  | 1  |
| HPY0223 | 14501 HPC | 1 | 1  | 1  | 1  | 1 | 1  | 1  |
| HPY0224 | 14502 HPC | 1 | 1  | 1  | 1  | 1 | 1  | 1  |
| HPY0225 | 14503 HPC | 1 | 0  | 1  | -1 | 1 | 0  | 1  |
| HPY0226 | 14504 HPC | 1 | 1  | 1  | 1  | 1 | 1  | 1  |
| HPY0227 | 14505 HPC | 1 | -1 | 0  | 0  | 1 | 0  | 1  |
| HPY1701 | 15979 HPC | 1 | 1  | 1  | 1  | 1 | 1  | 1  |
| HPY0229 | 14507 HPC | 1 | 0  | 1  | 1  | 1 | 0  | 1  |
| HPY1708 | 15986 HPC | 1 | 1  | 1  | 1  | 1 | 1  | 1  |
| HPY0231 | 14509 HPC | 1 | 1  | 1  | 0  | 1 | 1  | 1  |
| HPY0232 | 14510 HPC | 1 | 1  | 1  | 1  | 1 | 1  | 1  |
| HPY0233 | 14511 HPC | 1 | 1  | 1  | 1  | 1 | 1  | 1  |
| HPY0234 | 14512 HPC | 1 | 1  | 1  | 1  | 0 | 1  | 1  |
| HPY0235 | 14513 HPC | 1 | 1  | 1  | 1  | 1 | 1  | 1  |
| HPY0236 | 14514 HPC | 1 | 1  | 1  | 1  | 1 | 1  | 1  |
| HPY0237 | 14515 HPC | 1 | 1  | 1  | 1  | 1 | 1  | 1  |
| HPY0238 | 14516 HPC | 1 | 1  | 1  | 1  | 1 | 1  | 1  |
| HPY0239 | 14517 HPC | 1 | 0  | 1  | 1  | 1 | 1  | 1  |
| HPY0240 | 14518 HPC | 1 | 1  | 1  | 1  | 1 | 1  | 0  |
| HPY0241 | 14519 HPC | 1 | 1  | 1  | 1  | 1 | 1  | 1  |
| HPY0242 | 14520 HPC | 1 | 0  | 0  | 1  | 0 | 1  | 0  |
| HPY0243 | 14521 HPC | 1 | 1  | 1  | 1  | 0 | 1  | 1  |
| HPY0244 | 14522 HPC | 1 | 1  | 1  | 1  | 1 | 1  | 0  |
| HPY1749 | 16027 HPC | 1 | 1  | 1  | 1  | 0 | 1  | 0  |
| HPY0246 | 14524 HPC | 1 | 1  | 1  | 1  | 1 | 1  | 1  |
| HPY0247 | 14525 HPC | 1 | 1  | 1  | 1  | 1 | 1  | 0  |
| HPY0248 | 14526 HPC | 1 | 1  | 1  | 1  | 1 | 1  | 1  |
| HPY0249 | 14527 HPC | 1 | 1  | 1  | 1  | 1 | 1  | 1  |
| HPY1790 | 16068 HPC | 1 | 1  | 1  | 1  | 1 | 0  | 1  |
| HPY0251 | 14529 HPC | 1 | 1  | 1  | 1  | 1 | 1  | 1  |
| HPY0253 | 14531 HPC | 1 | -1 | 1  | -1 | 1 | 1  | 0  |
| HPY0254 | 14532 HPC | 1 | 0  | 1  | 1  | 1 | 1  | 1  |
| HPY0255 | 14533 HPC | 1 | 1  | 1  | 1  | 1 | 1  | 1  |
| HPY0256 | 14534 HPC | 1 | 1  | 1  | 1  | 1 | 1  | 0  |
| HPY0257 | 14535 HPC | 1 | 1  | 1  | 1  | 1 | 1  | 1  |
| HPY0258 | 14536 HPC | 1 | 1  | 1  | 1  | 1 | 0  | 0  |
| HPY1775 | 16053 HPC | 1 | 1  | 0  | 1  | 1 | 0  | 1  |
| HPY0260 | 14538 HPC | 1 | 0  | -1 | -1 | 1 | 1  | 1  |
| HPY0261 | 14539 HPC | 1 | -1 | -1 | -1 | 1 | 0  | 1  |
| HPY1794 | 16072 HPC | 1 | -1 | 0  | 0  | 1 | 1  | 0  |
| HPY0263 | 14541 HPC | 1 | 1  | 0  | 1  | 1 | 1  | 0  |
| HPY0264 | 14542 HPC | 1 | 0  | 1  | 1  | 1 | 1  | 1  |
| HPY0265 | 14543 HPC | 1 | 1  | 1  | 1  | 1 | 1  | 1  |
| HPY0266 | 14544 HPC | 1 | 1  | 1  | 1  | 1 | 1  | 1  |
| HPY0267 | 14545 HPC | 1 | 1  | 1  | 1  | 1 | 1  | 1  |
| HPY0268 | 14546 HPC | 1 | 1  | 1  | 1  | 0 | -1 | -1 |
| HPY1723 | 16001 HPC | 1 | 1  | 1  | 1  | 1 | 1  | 0  |
| HPY0270 | 14548 HPC | 1 | 1  | 1  | 1  | 1 | 1  | 1  |
| HPY0271 | 14549 HPC | 1 | 1  | 1  | 1  | 1 | 1  | 1  |
| HPY0272 | 14550 HPC | 1 | 1  | 1  | 1  | 1 | 1  | 1  |
| HPY0273 | 14551 HPC | 1 | 1  | 1  | 1  | 1 | 1  | 0  |
| HPY0274 | 14552 HPC | 1 | 1  | 1  | 1  | 1 | 1  | 1  |
| HPY0275 | 14553 HPC | 1 | 1  | 1  | 1  | 1 | 1  | 1  |

|         |           |   |    |   |    |    |    |    |
|---------|-----------|---|----|---|----|----|----|----|
| HPY0276 | 14554 HPC | 1 | 1  | 1 | 1  | 1  | 1  | 1  |
| HPY1745 | 16023 HPC | 1 | 1  | 1 | 1  | 1  | 1  | 0  |
| HPY0278 | 14556 HPC | 1 | 1  | 1 | 1  | 1  | 1  | 1  |
| HPY0279 | 14557 HPC | 1 | 1  | 1 | 1  | 1  | 1  | 1  |
| HPY0280 | 14558 HPC | 1 | 0  | 1 | 1  | 1  | 1  | 1  |
| HPY0281 | 14559 HPC | 1 | 1  | 1 | 1  | 1  | 1  | 0  |
| HPY0282 | 14560 HPC | 1 | 1  | 1 | 1  | 1  | 1  | 1  |
| HPY0283 | 14561 HPC | 1 | 0  | 1 | 1  | 1  | 1  | 1  |
| HPY0284 | 14562 HPC | 1 | 1  | 1 | 1  | 1  | 1  | 1  |
| HPY0285 | 14563 HPC | 1 | 1  | 1 | 1  | 1  | 1  | 1  |
| HPY0286 | 14564 HPC | 1 | 1  | 1 | 1  | 1  | 1  | 1  |
| HPY1700 | 15978 HPC | 1 | 1  | 0 | 1  | 1  | 0  | 1  |
| HPY0288 | 14566 HPC | 1 | 1  | 1 | 1  | 0  | 1  | 1  |
| HPY1751 | 16029 HPC | 1 | 0  | 0 | 0  | 1  | 0  | 0  |
| HPY0290 | 14568 HPC | 1 | 1  | 1 | 1  | 1  | 1  | 1  |
| HPY0291 | 14569 HPC | 1 | 1  | 1 | 1  | 1  | 1  | 1  |
| HPY0292 | 14570 HPC | 1 | 1  | 1 | 1  | 1  | 1  | 1  |
| HPY0293 | 14571 HPC | 1 | 1  | 1 | 1  | 1  | 1  | 1  |
| HPY0294 | 14572 HPC | 1 | 1  | 1 | 1  | 1  | 1  | 1  |
| HPY0295 | 14573 HPC | 1 | 1  | 1 | 1  | 1  | 1  | 1  |
| HPY0296 | 14574 HPC | 1 | 1  | 1 | 0  | 1  | 1  | 1  |
| HPY0297 | 14575 HPC | 1 | 1  | 1 | 1  | 1  | 1  | 1  |
| HPY1805 | 16083 HPC | 1 | 0  | 1 | 0  | 1  | 1  | 1  |
| HPY0299 | 14577 HPC | 1 | 1  | 1 | 1  | 1  | 0  | 1  |
| HPY0300 | 14578 HPC | 1 | 1  | 1 | 1  | 1  | 1  | 1  |
| HPY0301 | 14579 HPC | 1 | 1  | 1 | 1  | 1  | 1  | 1  |
| HPY0302 | 14580 HPC | 1 | 1  | 1 | 1  | 1  | 1  | 1  |
| HPY0303 | 14581 HPC | 1 | 0  | 1 | 0  | 0  | 1  | 1  |
| HPY0304 | 14582 HPC | 1 | 1  | 1 | 1  | 1  | 1  | 1  |
| HPY1731 | 16009 HPC | 1 | 1  | 1 | 1  | 1  | 1  | 1  |
| HPY1735 | 16013 HPC | 1 | 1  | 1 | 1  | 1  | 1  | 1  |
| HPY0307 | 14585 HPC | 1 | 1  | 1 | 1  | 1  | 1  | 1  |
| HPY0308 | 14586 HPC | 1 | 1  | 1 | 1  | 1  | 1  | 0  |
| HPY0309 | 14587 HPC | 1 | 1  | 1 | 1  | 1  | 1  | 1  |
| HPY0310 | 14588 HPC | 1 | 0  | 1 | 1  | 1  | 1  | 1  |
| HPY0311 | 14589 HPC | 1 | 1  | 1 | 1  | 1  | 0  | 0  |
| HPY0312 | 14590 HPC | 1 | 1  | 1 | 1  | 1  | 1  | 1  |
| HPY0313 | 14591 HPC | 1 | 1  | 1 | 1  | 1  | 1  | 1  |
| HPY0314 | 14592 HPC | 1 | -1 | 0 | -1 | 0  | -1 | 0  |
| HPY0315 | 14593 HPC | 1 | -1 | 1 | 1  | -1 | -1 | 0  |
| HPY0317 | 14595 HPC | 1 | -1 | 1 | 1  | 1  | -1 | -1 |
| HPY0318 | 14596 HPC | 1 | 1  | 1 | 1  | 1  | 1  | 1  |
| HPY0319 | 14597 HPC | 1 | 1  | 1 | 1  | 1  | 1  | 1  |
| HPY1744 | 16022 HPC | 1 | 1  | 1 | 1  | 1  | 1  | 1  |
| HPY0321 | 14599 HPC | 1 | 1  | 1 | 1  | 1  | 1  | 1  |
| HPY0322 | 14600 HPC | 1 | 1  | 1 | 1  | 1  | 1  | 0  |
| HPY0323 | 14601 HPC | 1 | 1  | 1 | 1  | 1  | 1  | 1  |
| HPY0324 | 14602 HPC | 1 | 1  | 1 | 1  | 1  | 1  | 0  |
| HPY0325 | 14603 HPC | 1 | 1  | 1 | 1  | 1  | 1  | 1  |
| HPY0326 | 14604 HPC | 1 | 1  | 1 | 1  | 1  | 1  | 1  |
| HPY0327 | 14605 HPC | 1 | 1  | 1 | 1  | 1  | 1  | 1  |
| HPY0328 | 14606 HPC | 1 | 1  | 1 | 1  | 1  | 1  | 1  |
| HPY0329 | 14607 HPC | 1 | 1  | 1 | 1  | 0  | 0  | 1  |
| HPY0330 | 14608 HPC | 1 | 1  | 1 | 1  | 1  | 1  | 1  |
| HPY0331 | 14609 HPC | 1 | 1  | 1 | 1  | 1  | 1  | 1  |

|         |           |   |    |    |    |    |    |    |
|---------|-----------|---|----|----|----|----|----|----|
| HPY0332 | 14610 HPC | 1 | 0  | 1  | 0  | 1  | 1  | 1  |
| HPY0333 | 14611 HPC | 1 | 1  | 1  | 1  | 1  | 1  | 1  |
| HPY0334 | 14612 HPC | 1 | 1  | 0  | 0  | 1  | 0  | 0  |
| HPY0335 | 14613 HPC | 1 | -1 | -1 | -1 | -1 | -1 | -1 |
| HPY0336 | 14614 HPC | 1 | -1 | -1 | -1 | -1 | -1 | -1 |
| HPY1806 | 16084 JHF | 1 | -1 | -1 | -1 | -1 | 1  | -1 |
| HPY0337 | 14615 HPC | 1 | 0  | 0  | -1 | 0  | -1 | 0  |
| HPY0338 | 14616 HPC | 1 | 0  | 0  | 0  | 0  | -1 | 0  |
| HPY0339 | 14617 HPC | 1 | -1 | -1 | -1 | -1 | -1 | -1 |
| HPY0340 | 14618 HPC | 1 | 0  | 0  | -1 | -1 | -1 | -1 |
| HPY0341 | 14619 HPC | 1 | -1 | -1 | -1 | 0  | -1 | -1 |
| HPY0342 | 14620 HPC | 1 | -1 | -1 | -1 | -1 | -1 | -1 |
| HPY0343 | 14621 HPC | 1 | 0  | 0  | -1 | -1 | -1 | -1 |
| HPY0344 | 14622 HPC | 1 | -1 | -1 | -1 | -1 | -1 | -1 |
| HPY0345 | 14623 HPC | 1 | 0  | -1 | -1 | 0  | -1 | -1 |
| HPY0346 | 14624 HPC | 1 | -1 | -1 | -1 | -1 | -1 | -1 |
| HPY0347 | 14625 HPC | 1 | 1  | 1  | 1  | 0  | 0  | 1  |
| HPY0348 | 14626 HPC | 1 | 1  | 1  | 1  | 1  | 1  | 1  |
| HPY0349 | 14627 HPC | 1 | 1  | 1  | 1  | 1  | 1  | 1  |
| HPY0350 | 14628 HPC | 1 | 1  | 1  | 1  | 1  | 0  | 0  |
| HPY1791 | 16069 HPC | 1 | 1  | 1  | 1  | 1  | 1  | 1  |
| HPY0352 | 14630 HPC | 1 | 1  | 1  | 1  | 1  | 1  | 1  |
| HPY0353 | 14631 HPC | 1 | 1  | 1  | 1  | 1  | 1  | 1  |
| HPY0354 | 14632 HPC | 1 | 1  | 1  | 1  | 0  | 1  | 1  |
| HPY0355 | 14633 HPC | 1 | 1  | 1  | 1  | 1  | 1  | 1  |
| HPY0356 | 14634 HPC | 1 | -1 | -1 | -1 | 1  | 1  | 1  |
| HPY0357 | 14635 HPC | 1 | 1  | 1  | 1  | 1  | 1  | 0  |
| HPY1797 | 16075 HPC | 1 | 1  | 1  | 1  | 1  | 1  | 1  |
| HPY0360 | 14638 HPC | 1 | 1  | 1  | 1  | 1  | 1  | 1  |
| HPY0361 | 14639 HPC | 1 | 1  | 1  | 1  | 1  | 1  | 1  |
| HPY0362 | 14640 HPC | 1 | 1  | 1  | 1  | 1  | 1  | 1  |
| HPY0363 | 14641 HPC | 1 | 1  | 1  | 1  | 1  | 1  | 1  |
| HPY0364 | 14642 HPC | 1 | 1  | -1 | 1  | 1  | 1  | 1  |
| HPY0365 | 14643 HPC | 1 | 1  | 1  | 0  | 1  | 1  | 1  |
| HPY0366 | 14644 HPC | 1 | 1  | 1  | 1  | 1  | 1  | 1  |
| HPY0367 | 14645 HPC | 1 | 1  | 1  | 1  | 1  | 1  | 0  |
| HPY0368 | 14646 HPC | 1 | 1  | 0  | 1  | 1  | 1  | 1  |
| HPY0369 | 14647 HPC | 1 | 1  | 1  | 1  | 1  | 1  | 1  |
| HPY0370 | 14648 HPC | 1 | 1  | 1  | 1  | 1  | 1  | 1  |
| HPY0371 | 14649 HPC | 1 | 1  | 1  | 1  | 1  | 1  | 1  |
| HPY0372 | 14650 HPC | 1 | 1  | 1  | 1  | 1  | 0  | 1  |
| HPY0373 | 14651 HPC | 1 | 1  | 1  | 1  | 1  | -1 | -1 |
| HPY0374 | 14652 HPC | 1 | 1  | 1  | 1  | 1  | 1  | 1  |
| HPY0375 | 14653 HPC | 1 | 1  | 1  | 0  | 1  | 0  | 0  |
| HPY0376 | 14654 HPC | 1 | 1  | 1  | 1  | 1  | 1  | 1  |
| HPY0377 | 14655 HPC | 1 | 1  | 1  | 1  | 1  | 1  | 1  |
| HPY0378 | 14656 HPC | 1 | 1  | 1  | 0  | 0  | 1  | 1  |
| HPY0379 | 14657 HPC | 1 | 0  | 1  | 1  | 0  | 1  | 0  |
| HPY0380 | 14658 HPC | 1 | 0  | 1  | 1  | 1  | 1  | 1  |
| HPY0381 | 14659 HPC | 1 | 1  | 0  | 0  | 0  | 1  | 1  |
| HPY0382 | 14660 HPC | 1 | 1  | 1  | 1  | 1  | 1  | 1  |
| HPY0383 | 14661 HPC | 1 | 1  | 1  | 1  | 1  | 1  | 1  |
| HPY0384 | 14662 HPC | 1 | 1  | 1  | 1  | 1  | -1 | 1  |
| HPY0385 | 14663 HPC | 1 | 1  | 1  | 0  | 1  | 1  | 0  |
| HPY0386 | 14664 HPC | 1 | 1  | 1  | 1  | 0  | 1  | 1  |

|         |           |   |    |    |    |    |    |    |
|---------|-----------|---|----|----|----|----|----|----|
| HPY0387 | 14665 HPC | 1 | 1  | 1  | 1  | 1  | 1  | 1  |
| HPY0388 | 14666 HPC | 1 | 1  | 1  | 1  | 1  | 1  | 1  |
| HPY0389 | 14667 HPC | 1 | 1  | 1  | 1  | 0  | 1  | 1  |
| HPY1734 | 16012 HPC | 1 | 0  | 0  | 1  | 0  | 1  | 1  |
| HPY0391 | 14669 HPC | 1 | 1  | 1  | 1  | 0  | 1  | 1  |
| HPY0392 | 14670 HPC | 1 | 1  | 1  | 1  | 1  | 1  | 0  |
| HPY0393 | 14671 HPC | 1 | 1  | 1  | 1  | 1  | 1  | 1  |
| HPY0394 | 14672 HPC | 1 | 1  | 1  | 1  | 1  | 1  | 1  |
| HPY0395 | 14673 HPC | 1 | 1  | 1  | 1  | 1  | 1  | 1  |
| HPY0396 | 14674 HPC | 1 | 1  | 1  | 1  | 1  | 1  | 1  |
| HPY0397 | 14675 HPC | 1 | 1  | 1  | 1  | 1  | 1  | 1  |
| HPY0398 | 14676 HPC | 1 | 1  | 1  | 1  | 1  | 0  | 1  |
| HPY0399 | 14677 HPC | 1 | 1  | 1  | 1  | 1  | 1  | 1  |
| HPY0400 | 14678 HPC | 1 | 1  | 1  | 1  | 1  | 1  | 1  |
| HPY0401 | 14679 HPC | 1 | 0  | 1  | 1  | 1  | 1  | 1  |
| HPY0402 | 14680 HPC | 1 | 1  | 1  | 1  | 1  | 1  | 1  |
| HPY0403 | 14681 HPC | 1 | 1  | 1  | 1  | 1  | 1  | 1  |
| HPY0404 | 14682 HPC | 1 | 1  | 1  | 1  | 1  | 1  | 1  |
| HPY0405 | 14683 HPC | 1 | 1  | 1  | 1  | 1  | 1  | 1  |
| HPY0406 | 14684 HPC | 1 | 1  | 1  | 1  | 1  | 1  | 1  |
| HPY0407 | 14685 HPC | 1 | 0  | 1  | 1  | 1  | 1  | 0  |
| HPY0408 | 14686 HPC | 1 | 0  | 1  | 1  | 1  | 0  | 0  |
| HPY0409 | 14687 HPC | 1 | 1  | 1  | 1  | 1  | 1  | 1  |
| HPY0410 | 14688 HPC | 1 | 1  | 1  | 1  | 1  | 0  | 1  |
| HPY0411 | 14689 HPC | 1 | 1  | 1  | 1  | 1  | 1  | 1  |
| HPY0412 | 14690 HPC | 1 | 0  | 1  | 0  | 1  | 0  | -1 |
| HPY0413 | 14691 HPC | 1 | 1  | 1  | 1  | -1 | 0  | 1  |
| HPY0414 | 14692 HPC | 1 | 1  | 1  | 1  | -1 | -1 | 1  |
| HPY0415 | 14693 HPC | 1 | 1  | 1  | 1  | 1  | 1  | 1  |
| HPY0416 | 14694 HPC | 1 | 1  | 1  | 1  | 1  | 1  | 1  |
| HPY0417 | 14695 HPC | 1 | 1  | 1  | 1  | 1  | 1  | 1  |
| HPY0418 | 14696 HPC | 1 | 1  | 1  | 1  | 1  | 1  | 1  |
| HPY0419 | 14697 HPC | 1 | 1  | 1  | 1  | 1  | 1  | 1  |
| HPY0420 | 14698 HPC | 1 | 1  | 1  | 1  | 1  | 1  | 1  |
| HPY0421 | 14699 HPC | 1 | 1  | 1  | 1  | 1  | 1  | 1  |
| HPY1656 | 15934 JHF | 1 | -1 | -1 | 0  | -1 | 1  | -1 |
| HPY1657 | 15935 JHF | 1 | 1  | 1  | 1  | 0  | 1  | 1  |
| HPY1658 | 15936 JHF | 1 | 0  | 1  | 1  | 1  | 1  | 1  |
| HPY1659 | 15937 JHF | 1 | 0  | 0  | 0  | -1 | 1  | 1  |
| HPY1660 | 15938 JHF | 1 | 1  | 1  | 1  | 1  | 1  | 1  |
| HPY1661 | 15939 JHF | 1 | -1 | 1  | -1 | -1 | 1  | 0  |
| HPY1662 | 15940 JHF | 1 | -1 | -1 | -1 | 0  | 1  | 1  |
| HPY1663 | 15941 JHF | 1 | -1 | 1  | 1  | -1 | 1  | 1  |
| HPY1664 | 15942 JHF | 1 | -1 | 1  | 1  | -1 | 1  | 1  |
| HPY0422 | 14700 HPC | 1 | 1  | 1  | 1  | 1  | 1  | 1  |
| HPY0423 | 14701 HPC | 1 | -1 | 1  | 0  | -1 | -1 | -1 |
| HPY0424 | 14702 HPC | 1 | 1  | 1  | 1  | 0  | 0  | -1 |
| HPY0425 | 14703 HPC | 1 | 1  | 0  | 1  | 0  | 0  | -1 |
| HPY0426 | 14704 HPC | 1 | 1  | 0  | 1  | 0  | 0  | -1 |
| HPY0427 | 14705 HPC | 1 | -1 | -1 | 0  | -1 | -1 | -1 |
| HPY1718 | 15996 HPC | 1 | -1 | -1 | -1 | -1 | -1 | -1 |
| HPY0430 | 14708 HPC | 1 | -1 | 0  | -1 | -1 | -1 | -1 |
| HPY0431 | 14709 HPC | 1 | -1 | -1 | -1 | -1 | -1 | -1 |
| HPY0432 | 14710 HPC | 1 | -1 | -1 | -1 | -1 | -1 | -1 |
| HPY1739 | 16017 HPC | 1 | -1 | -1 | -1 | -1 | -1 | -1 |



|         |           |   |    |    |    |    |    |    |
|---------|-----------|---|----|----|----|----|----|----|
| HPY0434 | 14712 HPC | 1 | -1 | -1 | -1 | -1 | -1 | -1 |
| HPY0435 | 14713 HPC | 1 | -1 | -1 | -1 | -1 | -1 | -1 |
| HPY1684 | 15962 HPC | 1 | -1 | 0  | -1 |    | -1 | 1  |
| HPY0437 | 14715 HPC | 1 | 0  | 1  | 1  | -1 | -1 | -1 |
| HPY0438 | 14716 HPC | 1 | -1 | 1  | 1  | -1 | -1 | -1 |
| HPY1777 | 16055 HPC | 1 | -1 | -1 | -1 | -1 | -1 | -1 |
| HPY1802 | 16080 HPC | 1 | -1 | -1 | -1 | -1 | -1 | -1 |
| HPY0441 | 14719 HPC | 1 | -1 | -1 | -1 | -1 | -1 | -1 |
| HPY0443 | 14721 HPC | 1 | -1 | -1 | -1 | -1 | -1 | -1 |
| HPY0445 | 14723 HPC | 1 | -1 | -1 | -1 | 0  | -1 |    |
| HPY0446 | 14724 HPC | 1 | -1 | -1 | -1 | -1 | -1 | -1 |
| HPY0447 | 14725 HPC | 1 | -1 | -1 | -1 | -1 | -1 | -1 |
| HPY0448 | 14726 HPC | 1 | -1 | -1 | -1 | -1 | -1 | -1 |
| HPY0449 | 14727 HPC | 1 | -1 | -1 | -1 | -1 | -1 | -1 |
| HPY0450 | 14728 HPC | 1 | -1 | -1 | -1 | -1 | -1 | -1 |
| HPY0451 | 14729 HPC | 1 | -1 | -1 | -1 | -1 | -1 | -1 |
| HPY0452 | 14730 HPC | 1 | -1 | -1 | -1 | -1 | -1 | -1 |
| HPY0453 | 14731 HPC | 1 | -1 | -1 | -1 | -1 | -1 | -1 |
| HPY0454 | 14732 HPC | 1 | -1 | -1 | -1 | -1 | -1 | -1 |
| HPY0455 | 14733 HPC | 1 | 1  | -1 | -1 | -1 | -1 | -1 |
| HPY0456 | 14734 HPC | 1 | 0  | 1  | 0  | -1 | -1 | -1 |
| HPY0457 | 14735 HPC | 1 | 1  | 1  | 1  | 0  | -1 |    |
| HPY0458 | 14736 HPC | 1 | 1  | 1  | 1  | -1 | -1 | 0  |
| HPY0459 | 14737 HPC | 1 | 1  | 1  | 1  | -1 | -1 | -1 |
| HPY0460 | 14738 HPC | 1 | 1  | 1  | 1  | 0  | -1 | -1 |
| HPY0462 | 14740 HPC | 1 | 1  | -1 | -1 | -1 | -1 | 0  |
| HPY0463 | 14741 HPC | 1 | 1  | 1  | 1  | 1  | 1  | 1  |
| HPY0464 | 14742 HPC | 1 | 0  | 0  | 0  | 1  | 0  | 0  |
| HPY0465 | 14743 HPC | 1 | 1  | 0  | 1  | 1  | 1  | 1  |
| HPY0466 | 14744 HPC | 1 | 1  | 1  | 1  | 1  | 1  | 1  |
| HPY0467 | 14745 HPC | 1 | 1  | 1  | 1  | 1  | 1  | 1  |
| HPY0468 | 14746 HPC | 1 | 1  | 1  | 1  | 1  | 1  | 1  |
| HPY0469 | 14747 HPC | 1 | 1  | 1  | 1  | 1  | 0  | 0  |
| HPY0470 | 14748 HPC | 1 | 1  | 1  | 1  | 1  | 1  | 1  |
| HPY0471 | 14749 HPC | 1 | 1  | 1  | 1  | 1  | 1  | 1  |
| HPY0472 | 14750 HPC | 1 | 1  | 1  | 1  | 1  | 1  | 1  |
| HPY0473 | 14751 HPC | 1 | 1  | 1  | 1  | 1  | 1  | 1  |
| HPY0474 | 14752 HPC | 1 | 1  | 1  | 1  | 1  | 1  | 1  |
| HPY0475 | 14753 HPC | 1 | 0  | 1  | 0  | 1  | 1  | 0  |
| HPY0476 | 14754 HPC | 1 | 1  | 1  | 1  | 1  | 1  | 1  |
| HPY0477 | 14755 HPC | 1 | 1  | 1  | 1  | 1  | 0  | 1  |
| HPY0478 | 14756 HPC | 1 | 1  | 1  | 1  | 1  | 1  | 1  |
| HPY0479 | 14757 HPC | 1 | 1  | 1  | 1  | 1  | 1  | 1  |
| HPY0480 | 14758 HPC | 1 | 1  | 1  | 1  | 1  | 1  | 1  |
| HPY1716 | 15994 HPC | 1 | 1  | 1  | 1  | -1 | 0  | 1  |
| HPY0482 | 14760 HPC | 1 | 1  | 1  | 1  | -1 | 1  | 1  |
| HPY0483 | 14761 HPC | 1 | 1  | -1 | -1 | -1 | 1  | 1  |
| HPY0484 | 14762 HPC | 1 | 1  | -1 | -1 | -1 | 1  | 1  |
| HPY0485 | 14763 HPC | 1 | 1  | 1  | 1  | 0  | 1  | 0  |
| HPY0486 | 14764 HPC | 1 | 1  | 1  | 0  | 1  | 1  | 1  |
| HPY0487 | 14765 HPC | 1 | 1  | 1  | 1  | 1  | 1  | 0  |
| HPY0488 | 14766 HPC | 1 | -1 | 1  | 0  | -1 | -1 | 0  |
| HPY0489 | 14767 HPC | 1 | 1  | 1  | 1  | 1  | -1 | -1 |
| HPY0490 | 14768 HPC | 1 | 1  | 1  | 1  | 1  | 1  | 1  |
| HPY0491 | 14769 HPC | 1 | 0  | 1  | 0  | 1  | 1  | 0  |

|         |           |   |    |    |    |    |    |    |
|---------|-----------|---|----|----|----|----|----|----|
| HPY0492 | 14770 HPC | 1 | 1  | 1  | 1  | 1  | 1  | 1  |
| HPY0493 | 14771 HPC | 1 | 1  | 1  | 1  | 1  | 1  | 1  |
| HPY1704 | 15982 HPC | 1 | 1  | 1  | 1  | 1  | 0  | 1  |
| HPY0495 | 14773 HPC | 1 | 1  | 1  | 1  | 1  | 1  | 1  |
| HPY0496 | 14774 HPC | 1 | 1  | 1  | 1  | 1  | 1  | 1  |
| HPY0497 | 14775 HPC | 1 | 1  | 1  | 1  | 1  | 1  | 1  |
| HPY0498 | 14776 HPC | 1 | 0  | 1  | 0  | 1  | 1  | 1  |
| HPY0499 | 14777 HPC | 1 | 1  | 1  | 1  | 1  | 1  | 1  |
| HPY0500 | 14778 HPC | 1 | 1  | 1  | 1  | 1  | 1  | 1  |
| HPY0501 | 14779 HPC | 1 | 1  | 1  | 1  | 1  | 1  | 1  |
| HPY0502 | 14780 HPC | 1 | 0  | -1 | 0  | 1  | 1  | 1  |
| HPY0503 | 14781 HPC | 1 | 0  | -1 | 1  | 1  | 1  | 1  |
| HPY0504 | 14782 HPC | 1 | -1 | -1 | 0  | 1  | 1  | 1  |
| HPY1736 | 16014 HPC | 1 | 0  | 0  | 0  | 1  | 1  | 0  |
| HPY0506 | 14784 HPC | 1 | 1  | 1  | 1  | 1  | 1  | 1  |
| HPY0507 | 14785 HPC | 1 | 1  | 0  | 1  | 1  | 1  | 1  |
| HPY0508 | 14786 HPC | 1 | 1  | 1  | 1  | 1  | 1  | 1  |
| HPY0509 | 14787 HPC | 1 | 1  | 1  | 1  | 1  | 1  | 1  |
| HPY0510 | 14788 HPC | 1 | 1  | 1  | 1  | 1  | 1  | 1  |
| HPY0511 | 14789 HPC | 1 | 0  | 1  | 0  | 0  | -1 | -1 |
| HPY0513 | 14791 HPC | 1 | -1 | -1 | -1 | 0  | 0  | 0  |
| HPY0514 | 14792 HPC | 1 | 1  | 1  | 1  | 1  | 1  | 1  |
| HPY0515 | 14793 HPC | 1 | 1  | 1  | 1  | 1  | 1  | 1  |
| HPY0516 | 14794 HPC | 1 | 1  | 1  | 1  | 1  | 1  | 1  |
| HPY1697 | 15975 HPC | 1 | 1  | 0  | 1  | 1  | 1  | 1  |
| HPY0518 | 14796 HPC | 1 | 1  | 0  | 1  | 1  | 1  | 1  |
| HPY0519 | 14797 HPC | 1 | 1  | 0  | 0  | 1  | 1  | 1  |
| HPY0520 | 14798 HPC | 1 | 1  | -1 | -1 | -1 | 1  | 1  |
| HPY0521 | 14799 HPC | 1 | -1 | -1 | -1 | -1 | 0  | 0  |
| HPY0522 | 14800 HPC | 1 | 1  | -1 | -1 | -1 | 1  | 1  |
| HPY0523 | 14801 HPC | 1 | 1  | -1 | -1 | -1 | 1  | 1  |
| HPY0524 | 14802 HPC | 1 | 1  | -1 | -1 | -1 | 1  | 1  |
| HPY0525 | 14803 HPC | 1 | 1  | -1 | -1 | -1 | 1  | 1  |
| HPY0526 | 14804 HPC | 1 | 1  | -1 | -1 | -1 | 1  | 1  |
| HPY1753 | 16031 HPC | 1 | 1  | -1 | -1 | -1 | 1  | 1  |
| HPY0528 | 14806 HPC | 1 | 1  | -1 | -1 | -1 | 1  | 1  |
| HPY0529 | 14807 HPC | 1 | 1  | -1 | -1 | -1 | 1  | 1  |
| HPY0530 | 14808 HPC | 1 | 1  | -1 | -1 | -1 | 1  | 1  |
| HPY0531 | 14809 HPC | 1 | 1  | -1 | -1 | -1 | 1  | 1  |
| HPY0532 | 14810 HPC | 1 | 1  | -1 | -1 | -1 | 1  | 1  |
| HPY0534 | 14812 HPC | 1 | 1  | -1 | -1 | -1 | 1  | 1  |
| HPY0535 | 14813 HPC | 1 | 1  | -1 | -1 | -1 | 1  | 1  |
| HPY0536 | 14814 HPC | 1 | 0  | -1 | -1 | -1 | 1  | 1  |
| HPY0537 | 14815 HPC | 1 | 1  | -1 | -1 | -1 | 1  | 1  |
| HPY0538 | 14816 HPC | 1 | 1  | -1 | -1 | -1 | 1  | 1  |
| HPY0539 | 14817 HPC | 1 | 1  | -1 | -1 | -1 | 1  | 1  |
| HPY0540 | 14818 HPC | 1 | 1  | -1 | -1 | -1 | 1  | 1  |
| HPY1714 | 15992 HPC | 1 | 1  | -1 | -1 | -1 | 1  | 1  |
| HPY0542 | 14820 HPC | 1 | 1  | -1 | -1 | -1 | 1  | 1  |
| HPY0543 | 14821 HPC | 1 | 1  | -1 | -1 | -1 | 1  | 1  |
| HPY0544 | 14822 HPC | 1 | 1  | -1 | -1 | -1 | 1  | 1  |
| HPY0545 | 14823 HPC | 1 | 1  | -1 | -1 | -1 | 1  | 1  |
| HPY0546 | 14824 HPC | 1 | 1  | -1 | -1 | -1 | 1  | 0  |
| HPY1758 | 16036 HPC | 1 | 1  | -1 | -1 | -1 | 0  | 1  |
| HPY0548 | 14826 HPC | 1 | -1 | -1 | -1 | 1  | 0  | 1  |

|         |           |   |    |    |    |    |    |    |
|---------|-----------|---|----|----|----|----|----|----|
| HPY0549 | 14827 HPC | 1 | 1  | 1  | 0  | 1  | 1  | 1  |
| HPY0550 | 14828 HPC | 1 | 1  | 1  | 1  | 1  | 1  | 1  |
| HPY0551 | 14829 HPC | 1 | 1  | 1  | 0  | 0  | 1  | 0  |
| HPY0552 | 14830 HPC | 1 | 1  | 1  | 1  | 1  | 1  | 1  |
| HPY0553 | 14831 HPC | 1 | 1  | 1  | 1  | 1  | 0  | 0  |
| HPY0554 | 14832 HPC | 1 | 1  | 1  | 1  | 1  | 0  | 0  |
| HPY1710 | 15988 HPC | 1 | 1  | 1  | 1  | 1  | 1  | 1  |
| HPY0556 | 14834 HPC | 1 | 1  | 1  | 1  | 1  | 1  | 1  |
| HPY0557 | 14835 HPC | 1 | 1  | 1  | 1  | 0  | 1  | 1  |
| HPY0558 | 14836 HPC | 1 | 1  | 1  | 1  | 1  | 1  | 0  |
| HPY0559 | 14837 HPC | 1 | 1  | 1  | 1  | 1  | -1 | 0  |
| HPY0560 | 14838 HPC | 1 | 1  | 1  | 0  | 1  | 1  | 1  |
| HPY0561 | 14839 HPC | 1 | 1  | 1  | 1  | 1  | 1  | 1  |
| HPY0562 | 14840 HPC | 1 | 0  | 0  | 0  | 1  | 1  | 1  |
| HPY0563 | 14841 HPC | 1 | 1  | 1  | 1  | 1  | 1  | 0  |
| HPY0564 | 14842 HPC | 1 | 1  | 1  | 1  | 1  | 1  | 1  |
| HPY0565 | 14843 HPC | 1 | 1  | 1  | 1  | 1  | 1  | 1  |
| HPY0566 | 14844 HPC | 1 | 1  | 1  | 1  | 1  | 0  | 1  |
| HPY0567 | 14845 HPC | 1 | 1  | 1  | 1  | 1  | 1  | 1  |
| HPY0568 | 14846 HPC | 1 | 1  | 1  | 1  | 1  | 1  | 1  |
| HPY0569 | 14847 HPC | 1 | 1  | 1  | 1  | 1  | 1  | 1  |
| HPY0570 | 14848 HPC | 1 | 1  | 1  | 1  | 1  | 1  | 1  |
| HPY0572 | 14850 HPC | 1 | 1  | 1  | 1  | 1  | 1  | 1  |
| HPY0573 | 14851 HPC | 1 | 1  | 1  | 1  | 1  | 1  | 1  |
| HPY0574 | 14852 HPC | 1 | 0  | 0  | 1  | 1  | 1  | 1  |
| HPY0575 | 14853 HPC | 1 | 1  | 1  | 1  | 1  | 1  | 1  |
| HPY0576 | 14854 HPC | 1 | 1  | 1  | 1  | 1  | 1  | 1  |
| HPY0577 | 14855 HPC | 1 | 1  | 1  | 1  | 1  | 1  | 1  |
| HPY0578 | 14856 HPC | 1 | 1  | 1  | 1  | 1  | 1  | 1  |
| HPY0579 | 14857 HPC | 1 | 1  | 1  | 1  | 1  | 1  | 1  |
| HPY0580 | 14858 HPC | 1 | 1  | 1  | 1  | 1  | 1  | 1  |
| HPY0581 | 14859 HPC | 1 | 1  | 1  | 1  | 1  | 1  | 1  |
| HPY0582 | 14860 HPC | 1 | 1  | 1  | 1  | 1  | 1  | 1  |
| HPY0583 | 14861 HPC | 1 | 1  | 1  | 1  | 1  | 1  | 0  |
| HPY0584 | 14862 HPC | 1 | 1  | 1  | 0  | 1  | 1  | 1  |
| HPY0585 | 14863 HPC | 1 | 1  | 1  | 1  | 1  | 1  | 1  |
| HPY0586 | 14864 HPC | 1 | 1  | 1  | 1  | 1  | 1  | 1  |
| HPY0587 | 14865 HPC | 1 | 1  | 1  | 1  | 1  | 1  | 1  |
| HPY0588 | 14866 HPC | 1 | 1  | 1  | 1  | 1  | 1  | 1  |
| HPY0589 | 14867 HPC | 1 | 1  | 1  | 0  | 1  | 1  | 1  |
| HPY0590 | 14868 HPC | 1 | 1  | 1  | 1  | 1  | 1  | 1  |
| HPY0591 | 14869 HPC | 1 | 1  | 1  | 1  | 1  | 1  | 1  |
| HPY1601 | 15879 JHF | 1 | 1  | 1  | 1  | -1 | 1  | 1  |
| HPY1762 | 16040 HPC | 1 | -1 | -1 | -1 | 1  | -1 | -1 |
| HPY0593 | 14871 HPC | 1 | -1 | -1 | -1 | 1  | -1 | -1 |
| HPY0594 | 14872 HPC | 1 | 1  | 1  | -1 | 1  | 0  | 0  |
| HPY0595 | 14873 HPC | 1 | 0  | 1  | 1  | 1  | 1  | 1  |
| HPY0596 | 14874 HPC | 1 | 1  | 1  | 1  | 1  | 1  | 1  |
| HPY0597 | 14875 HPC | 1 | 1  | 1  | 1  | 1  | 1  | 1  |
| HPY0598 | 14876 HPC | 1 | 1  | 1  | 1  | 1  | 1  | 1  |
| HPY1776 | 16054 HPC | 1 | 0  | 0  | 0  | 1  | 1  | 1  |
| HPY0600 | 14878 HPC | 1 | 0  | 0  | 1  | 1  | 1  | 1  |
| HPY0601 | 14879 HPC | 1 | 1  | 1  | 1  | 1  | 1  | 1  |
| HPY0602 | 14880 HPC | 1 | 1  | 0  | 1  | 1  | 1  | 1  |
| HPY0603 | 14881 HPC | 1 | 0  | 1  | 1  | 1  | 1  | 1  |

|         |           |   |    |   |   |    |   |   |
|---------|-----------|---|----|---|---|----|---|---|
| HPY0604 | 14882 HPC | 1 | 0  | 1 | 1 | 1  | 1 | 1 |
| HPY0605 | 14883 HPC | 1 | 1  | 1 | 1 | 1  | 1 | 1 |
| HPY0606 | 14884 HPC | 1 | 0  | 1 | 1 | 1  | 1 | 1 |
| HPY0607 | 14885 HPC | 1 | 1  | 1 | 1 | 1  | 1 | 1 |
| HPY0608 | 14886 HPC | 1 | 1  | 1 | 0 | 0  | 1 | 1 |
| HPY1757 | 16035 HPC | 1 | 0  | 1 | 1 | 1  | 0 | 1 |
| HPY1754 | 16032 HPC | 1 | 1  | 1 | 1 | 1  | 0 | 1 |
| HPY0611 | 14889 HPC | 1 | 1  | 1 | 1 | 1  | 1 | 1 |
| HPY0612 | 14890 HPC | 1 | 1  | 1 | 1 | 1  | 1 | 1 |
| HPY0613 | 14891 HPC | 1 | 1  | 1 | 1 | 1  | 1 | 1 |
| HPY0614 | 14892 HPC | 1 | 1  | 1 | 1 | 1  | 0 | 1 |
| HPY0615 | 14893 HPC | 1 | 1  | 1 | 1 | 1  | 1 | 1 |
| HPY0616 | 14894 HPC | 1 | 0  | 1 | 1 | 1  | 1 | 0 |
| HPY0617 | 14895 HPC | 1 | 1  | 1 | 1 | 1  | 1 | 1 |
| HPY0618 | 14896 HPC | 1 | 1  | 0 | 1 | 0  | 1 | 1 |
| HPY1602 | 15880 JHF | 1 | 1  | 1 | 1 | 0  | 1 | 1 |
| HPY0619 | 14897 HPC | 1 | 1  | 0 | 1 | 1  | 1 | 0 |
| HPY0620 | 14898 HPC | 1 | 1  | 1 | 0 | 1  | 1 | 1 |
| HPY0621 | 14899 HPC | 1 | 1  | 1 | 1 | 1  | 1 | 1 |
| HPY0622 | 14900 HPC | 1 | 0  | 1 | 1 | 1  | 1 | 1 |
| HPY0623 | 14901 HPC | 1 | 1  | 1 | 1 | 1  | 1 | 1 |
| HPY0624 | 14902 HPC | 1 | 1  | 1 | 1 | 1  | 1 | 1 |
| HPY0625 | 14903 HPC | 1 | 1  | 1 | 1 | 1  | 1 | 1 |
| HPY0626 | 14904 HPC | 1 | 1  | 1 | 1 | 1  | 1 | 1 |
| HPY0627 | 14905 HPC | 1 | 1  | 1 | 1 | 1  | 1 | 1 |
| HPY0628 | 14906 HPC | 1 | 1  | 1 | 1 | 1  | 1 | 1 |
| HPY0629 | 14907 HPC | 1 | 0  | 1 | 1 | 0  | 0 | 0 |
| HPY0630 | 14908 HPC | 1 | 0  | 1 | 1 | 1  | 1 | 1 |
| HPY0631 | 14909 HPC | 1 | 1  | 1 | 1 | 1  | 1 | 1 |
| HPY0632 | 14910 HPC | 1 | 1  | 0 | 1 | 1  | 1 | 1 |
| HPY0633 | 14911 HPC | 1 | 1  | 1 | 1 | 1  | 1 | 0 |
| HPY0634 | 14912 HPC | 1 | 1  | 1 | 1 | 1  | 1 | 1 |
| HPY0635 | 14913 HPC | 1 | 1  | 1 | 1 | 1  | 1 | 1 |
| HPY0636 | 14914 HPC | 1 | 0  | 1 | 1 | 1  | 1 | 1 |
| HPY1786 | 16064 HPC | 1 | 1  | 1 | 1 | 1  | 0 | 1 |
| HPY0638 | 14916 HPC | 1 | 1  | 1 | 1 | 1  | 1 | 1 |
| HPY0639 | 14917 HPC | 1 | 1  | 1 | 1 | 1  | 1 | 1 |
| HPY0640 | 14918 HPC | 1 | 1  | 1 | 1 | 1  | 1 | 1 |
| HPY0641 | 14919 HPC | 1 | 0  | 0 | 0 | 1  | 0 | 0 |
| HPY1603 | 15881 JHF | 1 | 0  | 0 | 0 | 0  | 1 | 1 |
| HPY0642 | 14920 HPC | 1 | 1  | 1 | 1 | 0  | 0 | 1 |
| HPY1604 | 15882 JHF | 1 | -1 | 0 | 0 | -1 | 1 | 1 |
| HPY0643 | 14921 HPC | 1 | 1  | 1 | 1 | 1  | 1 | 1 |
| HPY0644 | 14922 HPC | 1 | 0  | 0 | 1 | 1  | 1 | 1 |
| HPY0645 | 14923 HPC | 1 | 1  | 1 | 1 | 1  | 1 | 1 |
| HPY0646 | 14924 HPC | 1 | 1  | 1 | 1 | 1  | 1 | 1 |
| HPY0647 | 14925 HPC | 1 | 1  | 1 | 1 | 1  | 1 | 1 |
| HPY0648 | 14926 HPC | 1 | 1  | 1 | 1 | 1  | 1 | 1 |
| HPY0649 | 14927 HPC | 1 | 1  | 1 | 1 | 1  | 1 | 1 |
| HPY0650 | 14928 HPC | 1 | 1  | 1 | 1 | 1  | 1 | 1 |
| HPY0652 | 14930 HPC | 1 | 1  | 1 | 1 | 1  | 1 | 1 |
| HPY0653 | 14931 HPC | 1 | 1  | 1 | 1 | 1  | 1 | 1 |
| HPY0654 | 14932 HPC | 1 | 1  | 1 | 0 | 0  | 1 | 1 |
| HPY0655 | 14933 HPC | 1 | 1  | 1 | 1 | 1  | 1 | 1 |
| HPY0656 | 14934 HPC | 1 | 1  | 1 | 1 | 1  | 1 | 1 |

|         |       |     |   |    |    |    |    |    |    |
|---------|-------|-----|---|----|----|----|----|----|----|
| HPY0657 | 14935 | HPC | 1 | 1  | 1  | 1  | 1  | 1  | 1  |
| HPY1741 | 16019 | HPC | 1 | 1  | 1  | 0  | 1  | 1  | 1  |
| HPY0659 | 14937 | HPC | 1 | 1  | 1  | 1  | 1  | 1  | 1  |
| HPY0660 | 14938 | HPC | 1 | 1  | 1  | 1  | 1  | 1  | 1  |
| HPY0661 | 14939 | HPC | 1 | 1  | 1  | 0  | 1  | 1  | 0  |
| HPY0662 | 14940 | HPC | 1 | 1  | 1  | 1  | 1  | 1  | 1  |
| HPY0663 | 14941 | HPC | 1 | 1  | 1  | 1  | 1  | 1  | 1  |
| HPY0664 | 14942 | HPC | 1 | 1  | 1  | 1  | 1  | 1  | 1  |
| HPY0665 | 14943 | HPC | 1 | 1  | 1  | 1  | 0  | 1  | 1  |
| HPY0666 | 14944 | HPC | 1 | 1  | 1  | 1  | 1  | 1  | 1  |
| HPY0667 | 14945 | HPC | 1 | -1 | 0  | 0  | -1 | 1  | 1  |
| HPY0668 | 14946 | HPC | 1 | 1  | 1  | 1  | 1  | 0  | 1  |
| HPY1799 | 16077 | HPC | 1 | 0  | 1  | 0  | 1  | 0  | 0  |
| HPY0670 | 14948 | HPC | 1 | -1 | 1  | 1  | 1  | -1 | -1 |
| HPY0671 | 14949 | HPC | 1 | 1  | 1  | 1  | 1  | 1  | 1  |
| HPY0672 | 14950 | HPC | 1 | 1  | 1  | 1  | 1  | 1  | 1  |
| HPY1605 | 15883 | JHF | 1 | -1 | -1 | -1 | -1 | 1  | -1 |
| HPY0673 | 14951 | HPC | 1 | 1  | -1 | -1 | -1 | -1 | 1  |
| HPY0674 | 14952 | HPC | 1 | -1 | -1 | -1 | -1 | -1 | 0  |
| HPY0675 | 14953 | HPC | 1 | 1  | 0  | 0  | 0  | 1  | 1  |
| HPY0676 | 14954 | HPC | 1 | 1  | 1  | 1  | 0  | 1  | 1  |
| HPY0677 | 14955 | HPC | 1 | 1  | 1  | 1  | 1  | 1  | 1  |
| HPY0679 | 14957 | HPC | 1 | 1  | 1  | 1  | 1  | 1  | 1  |
| HPY0680 | 14958 | HPC | 1 | 1  | 1  | 1  | 1  | 1  | 1  |
| HPY0681 | 14959 | HPC | 1 | 0  | 1  | 1  | 1  | 1  | 1  |
| HPY0682 | 14960 | HPC | 1 | 0  | 0  | 0  | 1  | 1  | 0  |
| HPY0683 | 14961 | HPC | 1 | 1  | 1  | 1  | 1  | 1  | 1  |
| HPY0684 | 14962 | HPC | 1 | 1  | 1  | 1  | 1  | 1  | 1  |
| HPY0685 | 14963 | HPC | 1 | 1  | 1  | 1  | 1  | 1  | 1  |
| HPY0686 | 14964 | HPC | 1 | 0  | 0  | 0  | 0  | 1  | 1  |
| HPY0687 | 14965 | HPC | 1 | 1  | 1  | 0  | 0  | 1  | 0  |
| HPY0688 | 14966 | HPC | 1 | 0  | 1  | 1  | 1  | 1  | 1  |
| HPY1748 | 16026 | HPC | 1 | 1  | 1  | 1  | 1  | 1  | 1  |
| HPY0690 | 14968 | HPC | 1 | 0  | 1  | 0  | 1  | 1  | 1  |
| HPY0691 | 14969 | HPC | 1 | 0  | 1  | 1  | 1  | 1  | 1  |
| HPY1698 | 15976 | HPC | 1 | 1  | 1  | 1  | 1  | 1  | 1  |
| HPY0693 | 14971 | HPC | 1 | 1  | 1  | 1  | 1  | 1  | 1  |
| HPY0694 | 14972 | HPC | 1 | 1  | 1  | 1  | 1  | 1  | 1  |
| HPY0695 | 14973 | HPC | 1 | 1  | 1  | 1  | 1  | 1  | 1  |
| HPY0696 | 14974 | HPC | 1 | 1  | 1  | 1  | 1  | 1  | 1  |
| HPY0697 | 14975 | HPC | 1 | 1  | 1  | 1  | 1  | 1  | 1  |
| HPY1606 | 15884 | JHF | 1 | -1 | -1 | -1 | 1  | 1  | 1  |
| HPY1607 | 15885 | JHF | 1 | -1 | -1 | -1 | 1  | 1  | 1  |
| HPY0699 | 14977 | HPC | 1 | 1  | 1  | -1 | 1  | 1  | 1  |
| HPY0700 | 14978 | HPC | 1 | 0  | 1  | 0  | 0  | 1  | 0  |
| HPY0701 | 14979 | HPC | 1 | 1  | 1  | 1  | 1  | 1  | 0  |
| HPY0702 | 14980 | HPC | 1 | 1  | 1  | 0  | 1  | 0  | 1  |
| HPY0703 | 14981 | HPC | 1 | 1  | 1  | 1  | 1  | 1  | 1  |
| HPY1766 | 16044 | HPC | 1 | 1  | 1  | 1  | 1  | 1  | 1  |
| HPY0706 | 14984 | HPC | 1 | 1  | 1  | 1  | 1  | 1  | 1  |
| HPY0707 | 14985 | HPC | 1 | 1  | 1  | 1  | 1  | 1  | 1  |
| HPY0708 | 14986 | HPC | 1 | 1  | 1  | 1  | 1  | 0  | 1  |
| HPY0709 | 14987 | HPC | 1 | 1  | 1  | 0  | 0  | 1  | 1  |
| HPY0710 | 14988 | HPC | 1 | 1  | 1  | 1  | 0  | 1  | 0  |
| HPY0711 | 14989 | HPC | 1 | 1  | 1  | 1  | 1  | 1  | 1  |

|         |           |   |    |    |    |    |    |    |
|---------|-----------|---|----|----|----|----|----|----|
| HPY0712 | 14990 HPC | 1 | -1 | -1 | 0  | 1  | 1  | 1  |
| HPY0713 | 14991 HPC | 1 | -1 | -1 | -1 | 1  | 1  | 0  |
| HPY0714 | 14992 HPC | 1 | 1  | 1  | 1  | 1  | 1  | 1  |
| HPY0715 | 14993 HPC | 1 | 1  | 1  | 1  | 1  | 1  | 1  |
| HPY0716 | 14994 HPC | 1 | 1  | 1  | 1  | 1  | 1  | 1  |
| HPY0717 | 14995 HPC | 1 | 1  | 1  | 1  | 1  | 1  | 1  |
| HPY0718 | 14996 HPC | 1 | 1  | 1  | 1  | 1  | 1  | 1  |
| HPY0719 | 14997 HPC | 1 | 1  | 1  | 1  | 1  | 1  | 1  |
| HPY0720 | 14998 HPC | 1 | 1  | 1  | 1  | 1  | 1  | 0  |
| HPY0721 | 14999 HPC | 1 | 0  | 1  | 1  | 0  | 1  | 1  |
| HPY0722 | 15000 HPC | 1 | -1 | 1  | 1  | -1 | 1  | -1 |
| HPY0723 | 15001 HPC | 1 | 1  | 1  | 0  | 0  | 1  | 1  |
| HPY0724 | 15002 HPC | 1 | 1  | 1  | 1  | 1  | 1  | 1  |
| HPY0725 | 15003 HPC | 1 | 1  | 1  | 1  | 1  | 0  | 1  |
| HPY0726 | 15004 HPC | 1 | 1  | 1  | 1  | 1  | 1  | 1  |
| HPY0727 | 15005 HPC | 1 | 1  | 1  | 1  | 1  | 1  | 1  |
| HPY0728 | 15006 HPC | 1 | 1  | 1  | 1  | 0  | 1  | 1  |
| HPY0729 | 15007 HPC | 1 | 1  | 1  | 1  | 1  | 1  | 1  |
| HPY0730 | 15008 HPC | 1 | 0  | 1  | 1  | 1  | -1 | 0  |
| HPY0731 | 15009 HPC | 1 | 0  | 1  | 0  | 1  | 0  | 1  |
| HPY0733 | 15011 HPC | 1 | -1 | 1  | 1  | 0  | -1 | 1  |
| HPY0734 | 15012 HPC | 1 | 0  | 1  | 0  | 1  | 1  | 1  |
| HPY0735 | 15013 HPC | 1 | 1  | 1  | 1  | 1  | 1  | 1  |
| HPY0736 | 15014 HPC | 1 | 1  | 1  | 1  | 1  | 1  | 1  |
| HPY0737 | 15015 HPC | 1 | 1  | 1  | 1  | 1  | 1  | 1  |
| HPY0738 | 15016 HPC | 1 | 1  | 1  | 1  | 1  | 1  | 1  |
| HPY0739 | 15017 HPC | 1 | 1  | 0  | 1  | 1  | 1  | 1  |
| HPY0740 | 15018 HPC | 1 | 1  | 1  | 1  | 1  | 1  | 1  |
| HPY0741 | 15019 HPC | 1 | 1  | 1  | 1  | 0  | 1  | 1  |
| HPY0742 | 15020 HPC | 1 | 1  | 1  | 1  | 1  | 1  | 1  |
| HPY0743 | 15021 HPC | 1 | 1  | 1  | 1  | 1  | 1  | 1  |
| HPY0744 | 15022 HPC | 1 | 0  | 1  | 0  | -1 | 0  | 1  |
| HPY0745 | 15023 HPC | 1 | 1  | 1  | 1  | 1  | 1  | 1  |
| HPY0746 | 15024 HPC | 1 | 1  | 1  | 1  | 1  | 1  | 1  |
| HPY0747 | 15025 HPC | 1 | 1  | 1  | 1  | 1  | 1  | 1  |
| HPY0748 | 15026 HPC | 1 | 1  | 1  | 1  | 1  | 1  | 1  |
| HPY0749 | 15027 HPC | 1 | 1  | 1  | 1  | 1  | 1  | 1  |
| HPY0750 | 15028 HPC | 1 | 1  | 1  | 1  | 1  | 1  | 1  |
| HPY0751 | 15029 HPC | 1 | 1  | 1  | 1  | 1  | 1  | 1  |
| HPY0752 | 15030 HPC | 1 | 1  | 1  | 1  | 1  | 1  | 1  |
| HPY0753 | 15031 HPC | 1 | 1  | 1  | 1  | 1  | 1  | 1  |
| HPY0754 | 15032 HPC | 1 | 1  | 0  | 1  | 0  | 1  | 1  |
| HPY0755 | 15033 HPC | 1 | 1  | 1  | 1  | 1  | 1  | 1  |
| HPY0756 | 15034 HPC | 1 | 1  | 1  | 1  | 1  | 0  | 0  |
| HPY0757 | 15035 HPC | 1 | 1  | 1  | 1  | 1  | 1  | 1  |
| HPY0758 | 15036 HPC | 1 | 1  | 1  | 1  | 1  | 1  | 1  |
| HPY0759 | 15037 HPC | 1 | 1  | 1  | 1  | 1  | 1  | 1  |
| HPY0760 | 15038 HPC | 1 | 1  | 1  | 1  | 1  | 1  | 1  |
| HPY0761 | 15039 HPC | 1 | 1  | 1  | 1  | 1  | 1  | 1  |
| HPY0762 | 15040 HPC | 1 | 1  | 1  | 1  | 0  | 0  | 0  |
| HPY0763 | 15041 HPC | 1 | 1  | 1  | 1  | 1  | 1  | 1  |
| HPY0764 | 15042 HPC | 1 | 1  | 1  | 0  | -1 | -1 | 0  |
| HPY0765 | 15043 HPC | 1 | -1 | -1 | -1 | -1 | -1 | -1 |
| HPY1722 | 16000 HPC | 1 | -1 | -1 | -1 | -1 | -1 | -1 |
| HPY0767 | 15045 HPC | 1 | 0  | -1 | -1 | -1 | 0  | 1  |

|         |           |   |    |    |    |    |   |    |
|---------|-----------|---|----|----|----|----|---|----|
| HPY0768 | 15046 HPC | 1 | 1  | 1  | 1  | 1  | 1 | 1  |
| HPY0769 | 15047 HPC | 1 | 1  | 0  | 1  | 1  | 1 | 1  |
| HPY0770 | 15048 HPC | 1 | 1  | 1  | 1  | 1  | 1 | 1  |
| HPY0771 | 15049 HPC | 1 | 1  | 1  | 1  | 1  | 1 | 1  |
| HPY0772 | 15050 HPC | 1 | 1  | 1  | 1  | 1  | 1 | 1  |
| HPY0773 | 15051 HPC | 1 | 1  | 1  | 1  | 1  | 1 | 1  |
| HPY0774 | 15052 HPC | 1 | 1  | 1  | 1  | 1  | 1 | 1  |
| HPY0775 | 15053 HPC | 1 | 1  | 1  | 0  | 1  | 1 | 1  |
| HPY0776 | 15054 HPC | 1 | 1  | 1  | 1  | 1  | 0 | 0  |
| HPY0777 | 15055 HPC | 1 | 1  | 1  | 1  | 1  | 1 | 1  |
| HPY0778 | 15056 HPC | 1 | 0  | 0  | 1  | 1  | 1 | 1  |
| HPY1771 | 16049 HPC | 1 | 1  | 1  | 1  | 1  | 1 | 1  |
| HPY0780 | 15058 HPC | 1 | 1  | 1  | 1  | 1  | 0 | 1  |
| HPY0781 | 15059 HPC | 1 | 1  | 1  | 1  | 1  | 0 | 1  |
| HPY0782 | 15060 HPC | 1 | 1  | 1  | 1  | 1  | 0 | 1  |
| HPY0783 | 15061 HPC | 1 | 0  | 0  | 0  | 1  | 1 | 1  |
| HPY0784 | 15062 HPC | 1 | 0  | 1  | 0  | 1  | 1 | 0  |
| HPY0785 | 15063 HPC | 1 | 1  | 1  | 1  | 1  | 0 | 1  |
| HPY1769 | 16047 HPC | 1 | 1  | 1  | 1  | 1  | 1 | 1  |
| HPY0787 | 15065 HPC | 1 | 1  | 1  | 1  | 1  | 1 | 1  |
| HPY0788 | 15066 HPC | 1 | 1  | 1  | 1  | 1  | 1 | 1  |
| HPY0789 | 15067 HPC | 1 | 0  | 0  | 0  | 0  | 0 | 0  |
| HPY0790 | 15068 HPC | 1 | 1  | 1  | 1  | 0  | 0 | 1  |
| HPY1608 | 15886 JHF | 1 | 0  | 0  | 0  | -1 | 1 | -1 |
| HPY0791 | 15069 HPC | 1 | 1  | 1  | 0  | 1  | 0 | 0  |
| HPY0792 | 15070 HPC | 1 | 1  | 1  | 1  | 1  | 1 | 1  |
| HPY0793 | 15071 HPC | 1 | 1  | 1  | 1  | 1  | 1 | 1  |
| HPY0794 | 15072 HPC | 1 | 1  | 1  | 1  | 1  | 1 | 1  |
| HPY0795 | 15073 HPC | 1 | 1  | 1  | 1  | 1  | 1 | 1  |
| HPY0796 | 15074 HPC | 1 | 1  | 1  | 0  | 1  | 1 | 1  |
| HPY0797 | 15075 HPC | 1 | 1  | 1  | 1  | 1  | 1 | 1  |
| HPY0798 | 15076 HPC | 1 | 1  | 1  | 1  | 1  | 1 | 1  |
| HPY0799 | 15077 HPC | 1 | 1  | 1  | 0  | 1  | 1 | 1  |
| HPY0800 | 15078 HPC | 1 | 1  | 1  | 1  | 1  | 1 | 1  |
| HPY0801 | 15079 HPC | 1 | 0  | 1  | 0  | 1  | 1 | 1  |
| HPY0802 | 15080 HPC | 1 | 1  | 1  | 1  | 1  | 1 | 1  |
| HPY0803 | 15081 HPC | 1 | 0  | 1  | 0  | 1  | 1 | 1  |
| HPY0804 | 15082 HPC | 1 | 1  | 0  | 1  | 1  | 1 | 1  |
| HPY0805 | 15083 HPC | 1 | 1  | 1  | 1  | 1  | 1 | 1  |
| HPY0806 | 15084 HPC | 1 | 1  | 0  | 1  | 1  | 1 | 0  |
| HPY0807 | 15085 HPC | 1 | 1  | 1  | 1  | 1  | 1 | 1  |
| HPY0808 | 15086 HPC | 1 | 1  | 1  | 0  | 1  | 1 | 1  |
| HPY1740 | 16018 HPC | 1 | 1  | 1  | 1  | 0  | 1 | 1  |
| HPY0810 | 15088 HPC | 1 | 1  | 1  | 1  | 1  | 1 | 1  |
| HPY0812 | 15090 HPC | 1 | 1  | 1  | 1  | 1  | 1 | 0  |
| HPY0813 | 15091 HPC | 1 | 1  | 1  | 1  | 1  | 1 | 1  |
| HPY0814 | 15092 HPC | 1 | 1  | 1  | 1  | 1  | 1 | 1  |
| HPY0815 | 15093 HPC | 1 | 1  | 1  | 1  | 1  | 1 | 1  |
| HPY1609 | 15887 JHF | 1 | -1 | -1 | -1 | -1 | 1 | -1 |
| HPY1610 | 15888 JHF | 1 | -1 | -1 | -1 | -1 | 1 | -1 |
| HPY0816 | 15094 HPC | 1 | 1  | 1  | 1  | 1  | 1 | 1  |
| HPY0817 | 15095 HPC | 1 | 1  | 1  | 0  | 1  | 1 | 1  |
| HPY0818 | 15096 HPC | 1 | 1  | 1  | 1  | 1  | 1 | 1  |
| HPY0819 | 15097 HPC | 1 | 1  | 0  | 0  | 1  | 1 | 0  |
| HPY0820 | 15098 HPC | 1 | 1  | 1  | 1  | 1  | 1 | 1  |

|         |           |   |    |    |    |    |    |    |
|---------|-----------|---|----|----|----|----|----|----|
| HPY0821 | 15099 HPC | 1 | 1  | 0  | 1  | 1  | 1  | 1  |
| HPY0822 | 15100 HPC | 1 | 1  | 1  | 1  | 1  | 1  | 1  |
| HPY0823 | 15101 HPC | 1 | 1  | 0  | 1  | 0  | 1  | 0  |
| HPY0824 | 15102 HPC | 1 | 0  | 1  | 1  | 1  | 1  | 1  |
| HPY0825 | 15103 HPC | 1 | 1  | 1  | 1  | 1  | 1  | 1  |
| HPY0826 | 15104 HPC | 1 | 0  | 0  | 0  | 1  | 1  | 0  |
| HPY0827 | 15105 HPC | 1 | 1  | 1  | 1  | 0  | 1  | 1  |
| HPY0828 | 15106 HPC | 1 | 1  | 1  | 1  | 1  | 1  | 1  |
| HPY0829 | 15107 HPC | 1 | 1  | 1  | 1  | 1  | 1  | 1  |
| HPY0830 | 15108 HPC | 1 | 1  | 1  | 1  | 1  | 1  | 1  |
| HPY0831 | 15109 HPC | 1 | 0  | 0  | 1  | 1  | 1  | 1  |
| HPY0832 | 15110 HPC | 1 | 0  | 1  | 0  | 1  | 1  | 1  |
| HPY0833 | 15111 HPC | 1 | 1  | 1  | 0  | 1  | 1  | 1  |
| HPY0834 | 15112 HPC | 1 | 1  | 1  | 1  | 1  | 1  | 1  |
| HPY0835 | 15113 HPC | 1 | 1  | 1  | 1  | 1  | 1  | 1  |
| HPY0836 | 15114 HPC | 1 | 0  | 1  | 0  | 1  | 1  | 1  |
| HPY0837 | 15115 HPC | 1 | 1  | 1  | 1  | 0  | 1  | 0  |
| HPY0838 | 15116 HPC | 1 | 1  | 1  | 1  | 1  | 1  | 1  |
| HPY0839 | 15117 HPC | 1 | 1  | 1  | 1  | 1  | 1  | 1  |
| HPY0840 | 15118 HPC | 1 | 1  | 1  | 1  | 1  | 1  | 1  |
| HPY0841 | 15119 HPC | 1 | 1  | 1  | 1  | 1  | 1  | 1  |
| HPY0842 | 15120 HPC | 1 | 1  | 1  | 1  | 1  | 1  | 1  |
| HPY0843 | 15121 HPC | 1 | 0  | 1  | 1  | 1  | 0  | 0  |
| HPY0844 | 15122 HPC | 1 | 1  | 1  | 1  | 1  | 1  | 1  |
| HPY0845 | 15123 HPC | 1 | 1  | 1  | 1  | 1  | 1  | 0  |
| HPY0846 | 15124 HPC | 1 | 1  | 1  | 1  | 1  | 0  | 0  |
| HPY0848 | 15126 HPC | 1 | -1 | -1 | -1 | -1 | 1  | -1 |
| HPY0849 | 15127 HPC | 1 | -1 | 0  | -1 | 0  | -1 | 1  |
| HPY0850 | 15128 HPC | 1 | 1  | 1  | 1  | 1  | 0  | 0  |
| HPY0851 | 15129 HPC | 1 | 1  | 1  | 1  | 1  | 1  | 1  |
| HPY0852 | 15130 HPC | 1 | 1  | 0  | 0  | 1  | 1  | 1  |
| HPY0853 | 15131 HPC | 1 | 1  | 1  | 0  | 1  | 1  | 0  |
| HPY0854 | 15132 HPC | 1 | 0  | 0  | 0  | 1  | 1  | 1  |
| HPY0855 | 15133 HPC | 1 | 1  | -1 | -1 | 1  | -1 | -1 |
| HPY0856 | 15134 HPC | 1 | -1 | -1 | -1 | 1  | -1 | -1 |
| HPY0857 | 15135 HPC | 1 | 0  | 0  | 0  | 1  | 0  | 0  |
| HPY0858 | 15136 HPC | 1 | 1  | 1  | 1  | 1  | 1  | 1  |
| HPY0859 | 15137 HPC | 1 | 1  | 1  | 1  | 1  | 0  | 1  |
| HPY0860 | 15138 HPC | 1 | 0  | 1  | 1  | 1  | 1  | 1  |
| HPY0861 | 15139 HPC | 1 | 1  | 1  | 1  | 1  | 0  | 1  |
| HPY0862 | 15140 HPC | 1 | 1  | 1  | 1  | 1  | 1  | 1  |
| HPY0863 | 15141 HPC | 1 | 1  | 1  | 1  | 1  | 1  | 1  |
| HPY0864 | 15142 HPC | 1 | 1  | 1  | 0  | 0  | 1  | 0  |
| HPY0865 | 15143 HPC | 1 | 1  | 1  | 1  | 1  | 1  | 1  |
| HPY0866 | 15144 HPC | 1 | 1  | 1  | 1  | 1  | 1  | 1  |
| HPY0867 | 15145 HPC | 1 | 1  | 1  | 1  | 1  | 1  | 1  |
| HPY0868 | 15146 HPC | 1 | 1  | 1  | 1  | 1  | 1  | 1  |
| HPY0869 | 15147 HPC | 1 | 1  | 1  | 1  | 1  | 1  | 1  |
| HPY0870 | 15148 HPC | 1 | 1  | 1  | 1  | 1  | 1  | 1  |
| HPY0871 | 15149 HPC | 1 | 1  | 1  | 1  | 0  | 0  | 1  |
| HPY0872 | 15150 HPC | 1 | 1  | 0  | 1  | 0  | 0  | 0  |
| HPY0873 | 15151 HPC | 1 | 1  | 1  | 0  | 0  | 1  | 0  |
| HPY0874 | 15152 HPC | 1 | 1  | 1  | 1  | 1  | 1  | 1  |
| HPY0875 | 15153 HPC | 1 | 1  | 1  | 1  | 1  | 1  | 1  |
| HPY0876 | 15154 HPC | 1 | 1  | 1  | 1  | 1  | 1  | 1  |



|         |           |   |    |    |    |    |    |    |
|---------|-----------|---|----|----|----|----|----|----|
| HPY1792 | 16070 HPC | 1 | 1  | 1  | 1  | 1  | 1  | 1  |
| HPY0878 | 15156 HPC | 1 | 1  | 1  | 1  | 1  | -1 | 1  |
| HPY0879 | 15157 HPC | 1 | 1  | 1  | 1  | 1  | 1  | 1  |
| HPY1611 | 15889 JHF | 1 | -1 | -1 | -1 | -1 | 1  | 0  |
| HPY1612 | 15890 JHF | 1 | 1  | 1  | -1 | 1  | 1  | 1  |
| HPY0880 | 15158 HPC | 1 | -1 | 1  | 1  | -1 | -1 | -1 |
| HPY0881 | 15159 HPC | 1 | 1  | 1  | 1  | 1  | 0  | -1 |
| HPY0882 | 15160 HPC | 1 | -1 | 0  | -1 | -1 | -1 | -1 |
| HPY0883 | 15161 HPC | 1 | 1  | 1  | 1  | 1  | 1  | 1  |
| HPY0884 | 15162 HPC | 1 | 1  | 1  | 1  | 1  | 1  | 1  |
| HPY0885 | 15163 HPC | 1 | 1  | 1  | 1  | 1  | 1  | 1  |
| HPY0886 | 15164 HPC | 1 | 1  | 1  | 1  | 1  | 1  | 1  |
| HPY1756 | 16034 HPC | 1 | 0  | 1  | 0  | 0  | 1  | 1  |
| HPY1613 | 15891 JHF | 1 | -1 | -1 | -1 | -1 | 1  | 1  |
| HPY0888 | 15166 HPC | 1 | 1  | 1  | 1  | 1  | 1  | 1  |
| HPY0889 | 15167 HPC | 1 | 1  | 1  | 1  | 1  | 1  | 1  |
| HPY0890 | 15168 HPC | 1 | 1  | 1  | 1  | 1  | 1  | 1  |
| HPY0891 | 15169 HPC | 1 | 1  | 1  | 1  | 1  | 1  | 1  |
| HPY0892 | 15170 HPC | 1 | 1  | 0  | -1 | 1  | 1  | 1  |
| HPY0893 | 15171 HPC | 1 | 0  | 0  | -1 | 1  | 1  | 0  |
| HPY0895 | 15173 HPC | 1 | 1  | 0  | 0  | 1  | 0  | 0  |
| HPY0896 | 15174 HPC | 1 | 1  | 1  | 1  | 1  | 0  | 1  |
| HPY0897 | 15175 HPC | 1 | 1  | 1  | 1  | 1  | 0  | 0  |
| HPY1614 | 15892 JHF | 1 | -1 | -1 | -1 | 1  | 1  | 1  |
| HPY1615 | 15893 JHF | 1 | 1  | 0  | 0  | -1 | 1  | 1  |
| HPY1616 | 15894 JHF | 1 | 1  | 1  | 1  | -1 | 1  | 1  |
| HPY1617 | 15895 JHF | 1 | 1  | 1  | 1  | 1  | 1  | 1  |
| HPY1618 | 15896 JHF | 1 | -1 | 0  | -1 | -1 | 1  | 1  |
| HPY1619 | 15897 JHF | 1 | -1 | -1 | -1 | -1 | 1  | 1  |
| HPY1620 | 15898 JHF | 1 | -1 | 1  | 0  | -1 | 1  | 1  |
| HPY0898 | 15176 HPC | 1 | 1  | 1  | 1  | 1  | 0  | 1  |
| HPY0899 | 15177 HPC | 1 | 1  | 1  | 1  | 1  | 1  | 1  |
| HPY0900 | 15178 HPC | 1 | 1  | 1  | 1  | 1  | 1  | 1  |
| HPY0901 | 15179 HPC | 1 | 1  | 1  | 0  | 0  | 0  | 0  |
| HPY0902 | 15180 HPC | 1 | 1  | 0  | 0  | 0  | 0  | 1  |
| HPY0903 | 15181 HPC | 1 | 1  | 1  | 1  | -1 | 1  | 1  |
| HPY0904 | 15182 HPC | 1 | 1  | 1  | 1  | 1  | 1  | 1  |
| HPY1779 | 16057 HPC | 1 | 0  | 0  | 0  | 1  | 0  | 1  |
| HPY0908 | 15186 HPC | 1 | 1  | 1  | 1  | 1  | 1  | 1  |
| HPY0909 | 15187 HPC | 1 | 1  | 1  | 0  | 0  | 0  | 0  |
| HPY0910 | 15188 HPC | 1 | 1  | 1  | 1  | 1  | 1  | 1  |
| HPY0911 | 15189 HPC | 1 | 1  | 1  | 1  | 1  | 1  | 0  |
| HPY0912 | 15190 HPC | 1 | 1  | 1  | 1  | 1  | 1  | 1  |
| HPY0913 | 15191 HPC | 1 | 1  | 1  | 1  | 1  | 1  | 1  |
| HPY0914 | 15192 HPC | 1 | 1  | 1  | 1  | 1  | 1  | 1  |
| HPY0915 | 15193 HPC | 1 | 1  | 1  | 1  | 1  | 1  | 1  |
| HPY0916 | 15194 HPC | 1 | 1  | 1  | 1  | 1  | 1  | 1  |
| HPY0917 | 15195 HPC | 1 | 1  | 1  | 0  | 1  | -1 | 0  |
| HPY1738 | 16016 HPC | 1 | 0  | 0  | 1  | 1  | 1  | 1  |
| HPY1760 | 16038 HPC | 1 | 1  | 1  | 1  | 1  | 1  | 1  |
| HPY0920 | 15198 HPC | 1 | 1  | 1  | 1  | 1  | 1  | 1  |
| HPY0921 | 15199 HPC | 1 | 1  | 1  | 1  | 1  | 1  | 1  |
| HPY1755 | 16033 HPC | 1 | 1  | 1  | 0  | 1  | 1  | 1  |
| HPY0923 | 15201 HPC | 1 | 1  | 1  | 1  | 1  | 0  | 0  |
| HPY0924 | 15202 HPC | 1 | 1  | 1  | 1  | 1  | 1  | 1  |

|         |           |   |    |    |    |    |    |    |
|---------|-----------|---|----|----|----|----|----|----|
| HPY0925 | 15203 HPC | 1 | 1  | 1  | 1  | 0  | 1  | 1  |
| HPY0926 | 15204 HPC | 1 | 1  | 0  | 1  | 0  | 1  | 1  |
| HPY1687 | 15965 HPC | 1 | 1  | 1  | 1  | 1  | 1  | 1  |
| HPY0928 | 15206 HPC | 1 | 1  | 1  | 1  | 1  | 1  | 1  |
| HPY0929 | 15207 HPC | 1 | 1  | 1  | 1  | 1  | 1  | 1  |
| HPY0930 | 15208 HPC | 1 | 1  | 1  | 1  | 1  | 1  | 1  |
| HPY0931 | 15209 HPC | 1 | 1  | 1  | 1  | 1  | 1  | 0  |
| HPY0932 | 15210 HPC | 1 | 1  | 1  | 1  | 1  | 1  | 1  |
| HPY0933 | 15211 HPC | 1 | 1  | 1  | 1  | 0  | 1  | 1  |
| HPY0934 | 15212 HPC | 1 | 1  | 1  | 1  | 1  | 1  | 1  |
| HPY0935 | 15213 HPC | 1 | 1  | 1  | 1  | 0  | 1  | 1  |
| HPY0936 | 15214 HPC | 1 | 1  | 1  | 1  | 1  | 1  | 1  |
| HPY0937 | 15215 HPC | 1 | 0  | 1  | 1  | 1  | 1  | 0  |
| HPY0938 | 15216 HPC | 1 | 0  | 1  | 0  | 0  | 1  | -1 |
| HPY0939 | 15217 HPC | 1 | 1  | 1  | 1  | 1  | 1  | 1  |
| HPY0940 | 15218 HPC | 1 | 1  | 1  | 1  | 1  | 1  | 1  |
| HPY0941 | 15219 HPC | 1 | 1  | 1  | 1  | 1  | 1  | 1  |
| HPY0942 | 15220 HPC | 1 | 1  | 1  | 1  | 1  | 1  | 1  |
| HPY0943 | 15221 HPC | 1 | 1  | 1  | 1  | 0  | 1  | 1  |
| HPY0944 | 15222 HPC | 1 | 1  | 1  | 1  | 1  | 1  | 1  |
| HPY0945 | 15223 HPC | 1 | -1 | -1 | -1 | -1 | -1 | -1 |
| HPY0946 | 15224 HPC | 1 | 1  | 1  | 1  | 1  | 0  | 1  |
| HPY0947 | 15225 HPC | 1 | 0  | 1  | 1  | 0  | 1  | 1  |
| HPY0948 | 15226 HPC | 1 | 1  | 0  | 1  | 1  | 1  | 1  |
| HPY0949 | 15227 HPC | 1 | 1  | 1  | 1  | 1  | 1  | 1  |
| HPY0950 | 15228 HPC | 1 | 1  | 1  | 1  | 1  | 1  | 1  |
| HPY0951 | 15229 HPC | 1 | 1  | 1  | 1  | 1  | 1  | 1  |
| HPY0952 | 15230 HPC | 1 | 0  | 1  | 1  | 1  | 0  | 0  |
| HPY1703 | 15981 HPC | 1 | 1  | 1  | 1  | 0  | 0  | 1  |
| HPY0954 | 15232 HPC | 1 | 1  | 1  | 1  | 1  | 1  | 1  |
| HPY0955 | 15233 HPC | 1 | 1  | 1  | 1  | 1  | 1  | 1  |
| HPY0956 | 15234 HPC | 1 | 1  | 1  | 1  | 1  | 1  | 1  |
| HPY0957 | 15235 HPC | 1 | 1  | 1  | 1  | 1  | 1  | 1  |
| HPY0958 | 15236 HPC | 1 | 1  | 1  | 1  | 1  | 1  | 1  |
| HPY0959 | 15237 HPC | 1 | 1  | 1  | 1  | 1  | 1  | 1  |
| HPY1686 | 15964 HPC | 1 | 1  | 1  | 1  | 1  | 1  | 1  |
| HPY0961 | 15239 HPC | 1 | 1  | 1  | 1  | 1  | 1  | 1  |
| HPY1682 | 15960 HPC | 1 | 1  | -1 | -1 | 0  | -1 | -1 |
| HPY1622 | 15900 JHF | 1 | -1 | -1 | -1 | -1 | 1  | 0  |
| HPY0963 | 15241 HPC | 1 | 1  | -1 | -1 | 1  | 0  | 1  |
| HPY0964 | 15242 HPC | 1 | -1 | -1 | -1 | 1  | -1 | 1  |
| HPY0965 | 15243 HPC | 1 | 1  | -1 | -1 | 0  | 0  | 0  |
| HPY0966 | 15244 HPC | 1 | 1  | 0  | 1  | 1  | 1  | 1  |
| HPY1746 | 16024 HPC | 1 | -1 | 1  | 1  | -1 | -1 | 1  |
| HPY0968 | 15246 HPC | 1 | 0  | 1  | 0  | 1  | 1  |    |
| HPY1798 | 16076 HPC | 1 | 1  | 1  | 1  | 1  | 1  | 1  |
| HPY0970 | 15248 HPC | 1 | 1  | 1  | 1  | 1  | 1  | 1  |
| HPY0971 | 15249 HPC | 1 | 1  | 1  | 1  | 1  | 1  | 1  |
| HPY0972 | 15250 HPC | 1 | 1  | 1  | 1  | 0  | 1  | 1  |
| HPY0973 | 15251 HPC | 1 | 1  | 1  | 1  | 1  | 0  | 0  |
| HPY0974 | 15252 HPC | 1 | 1  | 1  | 1  | 1  | 1  | 1  |
| HPY0975 | 15253 HPC | 1 | -1 | 1  | 0  | 0  | -1 | 0  |
| HPY0976 | 15254 HPC | 1 | 1  | 1  | 1  | 1  | 1  | 1  |
| HPY0977 | 15255 HPC | 1 | 1  | 1  | 1  | 1  | 1  | 1  |
| HPY0978 | 15256 HPC | 1 | 1  | 1  | 1  | 1  | 1  | 1  |

|         |       |     |   |    |    |    |    |    |    |
|---------|-------|-----|---|----|----|----|----|----|----|
| HPY0979 | 15257 | HPC | 1 | 1  | 1  | 1  | 1  | 0  | 1  |
| HPY1623 | 15901 | JHF | 1 | -1 | -1 | -1 | -1 | 1  | 1  |
| HPY0980 | 15258 | HPC | 1 | 0  | 0  | -1 | 0  | -1 | 0  |
| HPY0981 | 15259 | HPC | 1 | 0  | 1  | 0  | 0  | 0  | 0  |
| HPY0982 | 15260 | HPC | 1 | -1 | -1 | -1 | -1 | -1 | -1 |
| HPY0983 | 15261 | HPC | 1 | 1  | 1  | 1  | 1  | 1  | 1  |
| HPY1624 | 15902 | JHF | 1 | 1  | 0  | 0  | 1  | 1  | 0  |
| HPY1625 | 15903 | JHF | 1 | -1 | 1  | 1  | 1  | 1  | -1 |
| HPY1626 | 15904 | JHF | 1 | -1 | 1  | 1  | 1  | 1  | -1 |
| HPY1627 | 15905 | JHF | 1 | -1 | 1  | 1  | 1  | 1  | -1 |
| HPY1628 | 15906 | JHF | 1 |    | 1  | 1  | 1  | 1  | -1 |
| HPY1629 | 15907 | JHF | 1 | -1 | 1  | 1  | 1  | 1  | -1 |
| HPY1630 | 15908 | JHF | 1 | -1 | 1  | 1  | 1  | 1  | -1 |
| HPY1631 | 15909 | JHF | 1 | -1 | 1  | 1  | 0  | 1  | -1 |
| HPY1632 | 15910 | JHF | 1 | -1 | 1  | 1  | 0  | 1  | -1 |
| HPY1633 | 15911 | JHF | 1 | 1  | 1  | 1  | -1 | 1  | 1  |
| HPY1634 | 15912 | JHF | 1 | 1  | 1  | 1  | -1 | 1  | 1  |
| HPY1635 | 15913 | JHF | 1 | 0  | 1  | 1  | 1  | 1  | 1  |
| HPY1752 | 16030 | JHF | 1 | 1  | 1  | 1  | 1  | 1  | 1  |
| HPY1637 | 15915 | JHF | 1 | 0  | 1  | 1  | -1 | 1  | 1  |
| HPY1638 | 15916 | JHF | 1 | -1 | 1  | 1  | -1 | 1  | 0  |
| HPY1639 | 15917 | JHF | 1 | 1  | 1  | 1  | -1 | 1  | 0  |
| HPY1640 | 15918 | JHF | 1 | 1  | 1  | 1  | -1 | 1  | -1 |
| HPY1641 | 15919 | JHF | 1 | 1  | 1  | 1  | -1 | 1  | -1 |
| HPY1642 | 15920 | JHF | 1 | 1  | 1  | 1  | -1 | 1  | -1 |
| HPY1643 | 15921 | JHF | 1 | 1  | 1  | 1  | -1 | 1  | -1 |
| HPY1644 | 15922 | JHF | 1 | 1  | 1  | 1  | -1 | 1  | -1 |
| HPY1645 | 15923 | JHF | 1 | -1 | 1  | 1  | -1 | 1  | -1 |
| HPY0984 | 15262 | HPC | 1 | -1 | 1  | -1 | -1 | -1 | 1  |
| HPY0985 | 15263 | HPC | 1 | -1 | -1 | -1 | -1 | -1 | -1 |
| HPY0986 | 15264 | HPC | 1 | -1 | -1 | -1 | -1 | -1 | -1 |
| HPY0987 | 15265 | HPC | 1 | -1 | -1 | -1 | -1 | 1  | -1 |
| HPY0988 | 15266 | HPC | 1 | 1  | 1  | 1  | -1 | -1 | -1 |
| HPY0989 | 15267 | HPC | 1 | -1 | 1  | 1  | -1 | -1 | -1 |
| HPY0990 | 15268 | HPC | 1 | -1 | 1  | 1  | -1 | 1  | -1 |
| HPY0991 | 15269 | HPC | 1 | -1 | 1  | 1  | -1 | 1  | -1 |
| HPY1646 | 15924 | JHF | 1 | -1 | -1 | -1 | -1 | 1  | -1 |
| HPY0992 | 15270 | HPC | 1 | -1 | 1  | 1  | -1 | 1  | -1 |
| HPY0993 | 15271 | HPC | 1 | 1  | 1  | 1  | -1 | -1 | -1 |
| HPY0994 | 15272 | HPC | 1 | 1  | 1  | 1  | -1 | -1 | -1 |
| HPY0995 | 15273 | HPC | 1 | 1  | 1  | 1  | -1 | 1  | 0  |
| HPY0996 | 15274 | HPC | 1 | 1  | -1 | -1 | -1 | 1  | -1 |
| HPY1648 | 15926 | JHF | 1 | 1  | 1  | 1  | -1 | 1  | 1  |
| HPY1649 | 15927 | JHF | 1 | 0  | 1  | 1  | 1  | 1  | 1  |
| HPY1650 | 15928 | JHF | 1 | -1 | 1  | 1  | 1  | 1  | 1  |
| HPY1651 | 15929 | JHF | 1 | -1 | 0  | 0  | -1 | 1  | 1  |
| HPY1652 | 15930 | JHF | 1 | -1 | -1 | -1 | -1 | 1  | 1  |
| HPY1653 | 15931 | JHF | 1 | -1 | -1 | -1 | -1 | 1  | 1  |
| HPY1654 | 15932 | JHF | 1 | -1 | 0  | -1 | 0  | 1  | 0  |
| HPY1655 | 15933 | JHF | 1 | -1 | -1 | -1 | -1 | 1  | 1  |
| HPY0997 | 15275 | HPC | 1 | -1 | 1  | 1  | -1 | -1 | -1 |
| HPY0998 | 15276 | HPC | 1 | 0  | 1  | 1  | -1 | -1 | -1 |
| HPY0999 | 15277 | HPC | 1 | 1  | 1  | 1  | 1  | -1 | 1  |
| HPY1000 | 15278 | HP1 | 1 | 1  | 1  | 1  | 1  | -1 | 1  |
| HPY1001 | 15279 | HP1 | 1 | 1  | 1  | 1  | 1  | -1 | 1  |

|         |       |     |   |    |   |    |    |    |    |
|---------|-------|-----|---|----|---|----|----|----|----|
| HPY1002 | 15280 | HP1 | 1 | 1  | 1 | 1  | 1  | -1 | 1  |
| HPY1003 | 15281 | HP1 | 1 | 1  | 1 | 1  | 1  | -1 | 1  |
| HPY1004 | 15282 | HP1 | 1 | 1  | 1 | 1  | 1  | -1 | 1  |
| HPY1006 | 15284 | HP1 | 1 | 1  | 1 | 1  | 1  | -1 | 1  |
| HPY1007 | 15285 | HP1 | 1 | 1  | 1 | 1  | -1 | 0  | 1  |
| HPY1008 | 15286 | HP1 | 1 | 1  | 1 | 1  | -1 | -1 | 1  |
| HPY1009 | 15287 | HP1 | 1 | -1 | 1 | 1  | 1  | -1 | 1  |
| HPY1599 | 15877 | JHF | 1 | 0  | 0 | -1 | -1 | 1  | -1 |
| HPY1010 | 15288 | HP1 | 1 | 1  | 1 | 1  | 1  | 1  | 1  |
| HPY1011 | 15289 | HP1 | 1 | 1  | 1 | 1  | 1  | 1  | 1  |
| HPY1012 | 15290 | HP1 | 1 | 1  | 1 | 1  | 1  | 1  | 1  |
| HPY1013 | 15291 | HP1 | 1 | 1  | 1 | 1  | 1  | 1  | 1  |
| HPY1014 | 15292 | HP1 | 1 | 1  | 1 | 1  | 1  | 1  | 1  |
| HPY1015 | 15293 | HP1 | 1 | 1  | 1 | 1  | 1  | 0  | 1  |
| HPY1016 | 15294 | HP1 | 1 | 1  | 1 | 1  | 0  | 1  | 1  |
| HPY1017 | 15295 | HP1 | 1 | 1  | 1 | 1  | 1  | 1  | 1  |
| HPY1019 | 15297 | HP1 | 1 | 1  | 1 | 1  | 1  | 1  | 1  |
| HPY1020 | 15298 | HP1 | 1 | 1  | 1 | 1  | 1  | 1  | 1  |
| HPY1021 | 15299 | HP1 | 1 | 1  | 1 | 1  | 1  | 1  | 1  |
| HPY1022 | 15300 | HP1 | 1 | 1  | 1 | 1  | 1  | 1  | 1  |
| HPY1023 | 15301 | HP1 | 1 | 1  | 1 | 1  | 1  | 0  | 1  |
| HPY1024 | 15302 | HP1 | 1 | 1  | 1 | 1  | 1  | 1  | 1  |
| HPY1025 | 15303 | HP1 | 1 | 1  | 1 | 1  | 1  | 1  | 1  |
| HPY1707 | 15985 | HP1 | 1 | 0  | 1 | 0  | 1  | 0  | 1  |
| HPY1027 | 15305 | HP1 | 1 | 1  | 0 | 1  | 1  | 1  | 1  |
| HPY1028 | 15306 | HP1 | 1 | 1  | 0 | 1  | 1  | 1  | 1  |
| HPY1029 | 15307 | HP1 | 1 | 1  | 0 | 0  | 0  | 0  | 0  |
| HPY1030 | 15308 | HP1 | 1 | 1  | 0 | 1  | 1  | 1  | 1  |
| HPY1031 | 15309 | HP1 | 1 | 1  | 1 | 1  | 1  | 1  | 1  |
| HPY1032 | 15310 | HP1 | 1 | 1  | 0 | 1  | 1  | 1  | 1  |
| HPY1033 | 15311 | HP1 | 1 | 1  | 0 | 1  | 1  | 1  | 1  |
| HPY1034 | 15312 | HP1 | 1 | 1  | 1 | 1  | 1  | 1  | 1  |
| HPY1035 | 15313 | HP1 | 1 | 1  | 1 | 1  | 1  | 1  | 1  |
| HPY1036 | 15314 | HP1 | 1 | 1  | 1 | 0  | 1  | 1  | 1  |
| HPY1037 | 15315 | HP1 | 1 | 1  | 1 | 1  | 1  | 1  | 1  |
| HPY1038 | 15316 | HP1 | 1 | 1  | 1 | 1  | 1  | 1  | 0  |
| HPY1039 | 15317 | HP1 | 1 | 1  | 1 | 1  | 0  | 1  | 1  |
| HPY1040 | 15318 | HP1 | 1 | 0  | 1 | 0  | 1  | 0  | 0  |
| HPY1041 | 15319 | HP1 | 1 | 1  | 1 | 1  | 1  | 1  | 1  |
| HPY1042 | 15320 | HP1 | 1 | 1  | 1 | 1  | 1  | 1  | 1  |
| HPY1043 | 15321 | HP1 | 1 | 1  | 1 | 1  | 1  | 1  | 1  |
| HPY1044 | 15322 | HP1 | 1 | 1  | 1 | 1  | 1  | 1  | 1  |
| HPY1803 | 16081 | HP1 | 1 | -1 | 1 | 1  | 1  | -1 | -1 |
| HPY1046 | 15324 | HP1 | 1 | 0  | 1 | 0  | 0  | 1  | 0  |
| HPY1047 | 15325 | HP1 | 1 | 1  | 0 | 0  | 0  | 1  | 1  |
| HPY1048 | 15326 | HP1 | 1 | 1  | 1 | 1  | 1  | 1  | 0  |
| HPY1049 | 15327 | HP1 | 1 | 1  | 1 | 1  | 1  | 1  | 0  |
| HPY1781 | 16059 | HP1 | 1 | 1  | 1 | 1  | 1  | 1  | 1  |
| HPY1051 | 15329 | HP1 | 1 | 1  | 1 | 1  | 1  | 1  | 1  |
| HPY1052 | 15330 | HP1 | 1 | 1  | 1 | 1  | 1  | 1  | 1  |
| HPY1782 | 16060 | HP1 | 1 | 1  | 1 | 1  | 0  | 0  | 0  |
| HPY1054 | 15332 | HP1 | 1 | 1  | 1 | 1  | 1  | 0  | 1  |
| HPY1055 | 15333 | HP1 | 1 | 1  | 1 | 1  | 1  | 0  | 0  |
| HPY1056 | 15334 | HP1 | 1 | 1  | 1 | 1  | 1  | 1  | 1  |
| HPY1694 | 15972 | HP1 | 1 | 1  | 1 | 1  | 1  | 1  | 1  |

|         |       |     |   |    |    |    |    |    |    |
|---------|-------|-----|---|----|----|----|----|----|----|
| HPY1058 | 15336 | HP1 | 1 | 1  | 1  | 1  | 1  | 0  | 0  |
| HPY1059 | 15337 | HP1 | 1 | 1  | 1  | 1  | 1  | 1  | 1  |
| HPY1060 | 15338 | HP1 | 1 | 1  | 1  | 1  | 1  | 1  | 1  |
| HPY1061 | 15339 | HP1 | 1 | 1  | 1  | 1  | 1  | 1  | 1  |
| HPY1062 | 15340 | HP1 | 1 | 1  | 1  | 1  | 1  | 1  | 1  |
| HPY1063 | 15341 | HP1 | 1 | 1  | 1  | 1  | 1  | 1  | 1  |
| HPY1064 | 15342 | HP1 | 1 | 1  | 1  | 1  | 1  | 1  | 1  |
| HPY1065 | 15343 | HP1 | 1 | 1  | 1  | 0  | 1  | 1  | 1  |
| HPY1066 | 15344 | HP1 | 1 | 1  | 1  | 1  | 1  | 1  | 1  |
| HPY1067 | 15345 | HP1 | 1 | 1  | 1  | 1  | 1  | 1  | 1  |
| HPY1068 | 15346 | HP1 | 1 | 1  | 1  | 1  | 1  | 1  | 1  |
| HPY1069 | 15347 | HP1 | 1 | 1  | 1  | 1  | 1  | 1  | 1  |
| HPY1070 | 15348 | HP1 | 1 | 1  | -1 | 0  | 0  | 0  | 1  |
| HPY1071 | 15349 | HP1 | 1 | 1  | 1  | 1  | 1  | 1  | 1  |
| HPY1072 | 15350 | HP1 | 1 | 1  | 1  | 0  | 1  | 1  | 1  |
| HPY1073 | 15351 | HP1 | 1 | 0  | 1  | 1  | 0  | 1  | 1  |
| HPY1074 | 15352 | HP1 | 1 | -1 | 0  | -1 | -1 | 1  | 1  |
| HPY1075 | 15353 | HP1 | 1 | 1  | 1  | 1  | 1  | 1  | 1  |
| HPY1076 | 15354 | HP1 | 1 | 1  | 1  | 1  | 1  | 1  | 1  |
| HPY1077 | 15355 | HP1 | 1 | 1  | 1  | 1  | 0  | 1  | 1  |
| HPY1078 | 15356 | HP1 | 1 | 1  | 0  | 0  | -1 | -1 | -1 |
| HPY1079 | 15357 | HP1 | 1 | 1  | 1  | 1  | -1 | 1  | 0  |
| HPY1080 | 15358 | HP1 | 1 | 1  | 1  | 1  | 1  | 1  | 1  |
| HPY1081 | 15359 | HP1 | 1 | 1  | 1  | 1  | 1  | 1  | 1  |
| HPY1082 | 15360 | HP1 | 1 | 1  | 1  | 1  | 1  | 1  | 1  |
| HPY1083 | 15361 | HP1 | 1 | 1  | 1  | 1  | 1  | 1  | 1  |
| HPY1084 | 15362 | HP1 | 1 | 1  | 1  | 1  | 1  | 1  | 1  |
| HPY1085 | 15363 | HP1 | 1 | 1  | 1  | 1  | 1  | 1  | 1  |
| HPY1086 | 15364 | HP1 | 1 | 1  | 1  | 1  | 1  | 1  | 0  |
| HPY1087 | 15365 | HP1 | 1 | 1  | 1  | 1  | 1  | 1  | 1  |
| HPY1088 | 15366 | HP1 | 1 | 1  | 1  | 1  | 1  | 1  | 1  |
| HPY1089 | 15367 | HP1 | 1 | 1  | 0  | 1  | 1  | 1  | 1  |
| HPY1090 | 15368 | HP1 | 1 | 1  | 1  | 1  | 1  | 1  | 1  |
| HPY1091 | 15369 | HP1 | 1 | 1  | 1  | 1  | 1  | 1  | 1  |
| HPY1092 | 15370 | HP1 | 1 | 1  | 1  | 1  | 1  | 1  | 1  |
| HPY1598 | 15876 | JHF | 1 | 0  | 0  | -1 | 0  | 1  | -1 |
| HPY1093 | 15371 | HP1 | 1 | -1 | 1  | 1  | -1 | -1 | 1  |
| HPY1094 | 15372 | HP1 | 1 | -1 | 1  | 0  | -1 | -1 | -1 |
| HPY1095 | 15373 | HP1 | 1 | -1 | 1  | 1  | -1 | -1 | -1 |
| HPY1096 | 15374 | HP1 | 1 | 1  | 1  | 1  | -1 | -1 | -1 |
| HPY1097 | 15375 | HP1 | 1 | 0  | 1  | 1  | 1  | 0  | 1  |
| HPY1098 | 15376 | HP1 | 1 | 1  | 1  | 1  | 1  | 1  | 1  |
| HPY1099 | 15377 | HP1 | 1 | 1  | 1  | 1  | 1  | 1  | 1  |
| HPY1100 | 15378 | HP1 | 1 | 1  | 1  | 1  | 1  | 1  | 1  |
| HPY1101 | 15379 | HP1 | 1 | 1  | 1  | 1  | 1  | 1  | 1  |
| HPY1102 | 15380 | HP1 | 1 | 1  | 1  | 1  | 1  | 1  | 0  |
| HPY1103 | 15381 | HP1 | 1 | 1  | 1  | 1  | 1  | 1  | 1  |
| HPY1104 | 15382 | HP1 | 1 | 1  | 1  | 1  | 1  | 1  | 1  |
| HPY1105 | 15383 | HP1 | 1 | -1 | 0  | 0  | 0  | 1  | 1  |
| HPY1665 | 15943 | JHF | 1 | -1 | 1  | 1  | -1 | 1  | 1  |
| HPY1106 | 15384 | HP1 | 1 | 1  | 1  | 1  | 1  | 1  | 1  |
| HPY1107 | 15385 | HP1 | 1 | 1  | 1  | 1  | 1  | 1  | 1  |
| HPY1108 | 15386 | HP1 | 1 | 1  | 1  | 1  | 1  | 1  | 1  |
| HPY1109 | 15387 | HP1 | 1 | 1  | 1  | 1  | 1  | 1  | 1  |
| HPY1110 | 15388 | HP1 | 1 | 1  | 1  | 1  | 1  | 1  | 1  |

|         |       |     |   |    |    |    |    |    |    |
|---------|-------|-----|---|----|----|----|----|----|----|
| HPY1111 | 15389 | HP1 | 1 | 1  | 1  | 1  | 1  | 1  | 1  |
| HPY1112 | 15390 | HP1 | 1 | 1  | 1  | 1  | 1  | 1  | 1  |
| HPY1113 | 15391 | HP1 | 1 | 1  | 1  | 0  | 1  | 1  | 1  |
| HPY1795 | 16073 | HP1 | 1 | 1  | 1  | 1  | 1  | 1  | 1  |
| HPY1115 | 15393 | HP1 | 1 | 0  | 1  | 0  | 0  | -1 | 0  |
| HPY1666 | 15944 | JHF | 1 | -1 | 1  | 1  | -1 | 1  | 0  |
| HPY1765 | 16043 | HP1 | 1 | -1 | 0  | 0  | 0  | -1 | 1  |
| HPY1117 | 15395 | HP1 | 1 | 1  | 1  | 1  | 1  | 1  | 1  |
| HPY1118 | 15396 | HP1 | 1 | 1  | 1  | 1  | 1  | 1  | 1  |
| HPY1119 | 15397 | HP1 | 1 | 1  | 1  | 1  | 1  | 1  | 1  |
| HPY1120 | 15398 | HP1 | 1 | 1  | 1  | 1  | 0  | 1  | 1  |
| HPY1667 | 15945 | JHF | 1 | -1 | -1 | -1 | -1 | 1  | -1 |
| HPY1121 | 15399 | HP1 | 1 | 0  | 1  | 1  | 1  | 1  | 1  |
| HPY1122 | 15400 | HP1 | 1 | 1  | 1  | 1  | 1  | 1  | 0  |
| HPY1123 | 15401 | HP1 | 1 | 1  | 1  | 1  | 1  | 1  | 1  |
| HPY1124 | 15402 | HP1 | 1 | 1  | 1  | 1  | 1  | 1  | 1  |
| HPY1125 | 15403 | HP1 | 1 | 1  | 1  | 1  | 1  | 1  | 1  |
| HPY1126 | 15404 | HP1 | 1 | 1  | 1  | 1  | 1  | 1  | 1  |
| HPY1807 | 16085 | HP1 | 1 | 1  | 1  | 1  | 0  | 0  | 1  |
| HPY1129 | 15407 | HP1 | 1 | 0  | 1  | 0  | 1  | 1  | 1  |
| HPY1130 | 15408 | HP1 | 1 | 1  | 1  | 1  | 1  | 1  | 1  |
| HPY1131 | 15409 | HP1 | 1 | 1  | 1  | 1  | 1  | 1  | 1  |
| HPY1725 | 16003 | HP1 | 1 | 1  | 1  | 1  | 1  | 1  | 1  |
| HPY1133 | 15411 | HP1 | 1 | 1  | 1  | 1  | 1  | 1  | 1  |
| HPY1134 | 15412 | HP1 | 1 | 1  | 1  | 1  | 1  | 1  | 1  |
| HPY1135 | 15413 | HP1 | 1 | 1  | 1  | 1  | 1  | 1  | 1  |
| HPY1136 | 15414 | HP1 | 1 | 1  | 1  | 1  | 1  | 1  | 1  |
| HPY1137 | 15415 | HP1 | 1 | 1  | 1  | 1  | 1  | 1  | 1  |
| HPY1138 | 15416 | HP1 | 1 | 1  | 1  | 1  | 1  | 1  | 1  |
| HPY1139 | 15417 | HP1 | 1 | 1  | 1  | 1  | 1  | 1  | 1  |
| HPY1140 | 15418 | HP1 | 1 | 1  | 1  | 1  | 1  | 1  | 1  |
| HPY1141 | 15419 | HP1 | 1 | 1  | 1  | 1  | 1  | 1  | 1  |
| HPY1801 | 16079 | HP1 | 1 | 1  | -1 | -1 | 1  | 1  | -1 |
| HPY1143 | 15421 | HP1 | 1 | 1  | 1  | 1  | 1  | 1  | 1  |
| HPY1144 | 15422 | HP1 | 1 | 1  | 1  | 0  | 0  | -1 | -1 |
| HPY1145 | 15423 | HP1 | 1 | 1  | 1  | 1  | 0  | 1  | 1  |
| HPY1146 | 15424 | HP1 | 1 | 1  | 1  | 1  | 1  | 1  | 0  |
| HPY1147 | 15425 | HP1 | 1 | 0  | 1  | 1  | 1  | 1  | 1  |
| HPY1148 | 15426 | HP1 | 1 | 1  | 1  | 1  | 1  | 1  | 1  |
| HPY1149 | 15427 | HP1 | 1 | 0  | 1  | 1  | 1  | 1  | 0  |
| HPY1150 | 15428 | HP1 | 1 | 1  | 1  | 1  | 1  | 0  | 1  |
| HPY1151 | 15429 | HP1 | 1 | 0  | 1  | 1  | 0  | 1  | 1  |
| HPY1152 | 15430 | HP1 | 1 | 1  | 1  | 1  | 1  | 1  | 1  |
| HPY1153 | 15431 | HP1 | 1 | 1  | 1  | 0  | 1  | 1  | 0  |
| HPY1154 | 15432 | HP1 | 1 | 1  | 1  | 1  | 1  | 1  | 1  |
| HPY1155 | 15433 | HP1 | 1 | 1  | 1  | 1  | 1  | 1  | 1  |
| HPY1156 | 15434 | HP1 | 1 | 1  | 1  | 1  | 1  | 1  | 1  |
| HPY1157 | 15435 | HP1 | 1 | 0  | 1  | 0  | 1  | 1  | 1  |
| HPY1158 | 15436 | HP1 | 1 | 1  | 1  | 1  | 1  | 1  | 1  |
| HPY1159 | 15437 | HP1 | 1 | 1  | 1  | 1  | 1  | 1  | 1  |
| HPY1160 | 15438 | HP1 | 1 | 0  | 1  | 1  | 1  | 0  | 1  |
| HPY1161 | 15439 | HP1 | 1 | 1  | 1  | 1  | 1  | 1  | 1  |
| HPY1162 | 15440 | HP1 | 1 | 1  | 1  | 1  | 1  | 1  | 1  |
| HPY1163 | 15441 | HP1 | 1 | 0  | 0  | 1  | 0  | 1  | 1  |
| HPY1164 | 15442 | HP1 | 1 | 1  | 1  | 1  | 1  | 1  | 1  |

|         |       |     |   |    |    |    |    |    |    |
|---------|-------|-----|---|----|----|----|----|----|----|
| HPY1165 | 15443 | HP1 | 1 | 1  | 1  | 1  | 1  | 1  | 1  |
| HPY1166 | 15444 | HP1 | 1 | 1  | 1  | 1  | 1  | 1  | 1  |
| HPY1167 | 15445 | HP1 | 1 | 1  | 1  | 1  | 1  | 1  | 1  |
| HPY1168 | 15446 | HP1 | 1 | 1  | 1  | 1  | 1  | 1  | 1  |
| HPY1169 | 15447 | HP1 | 1 | 1  | 1  | 1  | 1  | 1  | 1  |
| HPY1170 | 15448 | HP1 | 1 | 1  | 1  | 1  | 1  | 1  | 1  |
| HPY1171 | 15449 | HP1 | 1 | 1  | 1  | 1  | 1  | 1  | 1  |
| HPY1172 | 15450 | HP1 | 1 | 1  | 1  | 1  | 1  | 1  | 1  |
| HPY1173 | 15451 | HP1 | 1 | 1  | 1  | 1  | 1  | 1  | 1  |
| HPY1174 | 15452 | HP1 | 1 | 1  | 1  | 1  | 1  | 1  | 1  |
| HPY1175 | 15453 | HP1 | 1 | 1  | 1  | 1  | 0  | 1  | 1  |
| HPY1177 | 15455 | HP1 | 1 | 1  | -1 | -1 | -1 | 0  | 1  |
| HPY1178 | 15456 | HP1 | 1 | 1  | 1  | 1  | 1  | 1  | 1  |
| HPY1179 | 15457 | HP1 | 1 | 1  | 1  | 1  | 1  | 1  | 1  |
| HPY1180 | 15458 | HP1 | 1 | 1  | 1  | 1  | 1  | 1  | 1  |
| HPY1181 | 15459 | HP1 | 1 | 1  | 1  | 1  | 1  | 1  | 1  |
| HPY1182 | 15460 | HP1 | 1 | 1  | 1  | 1  | 1  | 1  | 1  |
| HPY1183 | 15461 | HP1 | 1 | 1  | 1  | 1  | 1  | 1  | 1  |
| HPY1184 | 15462 | HP1 | 1 | 1  | 1  | 1  | 1  | 1  | 1  |
| HPY1185 | 15463 | HP1 | 1 | 1  | 1  | 1  | 1  | 1  | 1  |
| HPY1186 | 15464 | HP1 | 1 | 1  | 1  | 1  | 1  | 1  | 1  |
| HPY1187 | 15465 | HP1 | 1 | 1  | 1  | 1  | 0  | 0  | 0  |
| HPY1188 | 15466 | HP1 | 1 | 0  | 1  | 1  | 0  | 0  | 1  |
| HPY1189 | 15467 | HP1 | 1 | 0  | 1  | 1  | 1  | 1  | 0  |
| HPY1190 | 15468 | HP1 | 1 | 1  | 1  | 1  | 1  | 1  | 1  |
| HPY1191 | 15469 | HP1 | 1 | 1  | 1  | 1  | 1  | 1  | 1  |
| HPY1192 | 15470 | HP1 | 1 | 0  | 1  | 1  | 0  | -1 | 0  |
| HPY1193 | 15471 | HP1 | 1 | -1 | 1  | 1  | 1  | -1 | -1 |
| HPY1194 | 15472 | HP1 | 1 | -1 |    | 1  | 1  | -1 |    |
| HPY1195 | 15473 | HP1 | 1 | 1  | 1  | 1  | 1  | 1  | 1  |
| HPY1196 | 15474 | HP1 | 1 | 1  | 1  | 1  | 1  | 1  | 1  |
| HPY1197 | 15475 | HP1 | 1 | 1  | 1  | 1  | 1  | 1  | 1  |
| HPY1750 | 16028 | HP1 | 1 | 0  | 1  | 1  | 1  | 1  | 1  |
| HPY1199 | 15477 | HP1 | 1 | 1  | 1  | 1  | 1  | 1  | 1  |
| HPY1200 | 15478 | HP1 | 1 | 1  | 1  | 1  | 1  | 1  | 1  |
| HPY1201 | 15479 | HP1 | 1 | 1  | 1  | 1  | 1  | 1  | 1  |
| HPY1202 | 15480 | HP1 | 1 | 1  | 1  | 1  | 1  | 1  | 1  |
| HPY1726 | 16004 | HP1 | 1 | 0  | 1  | 1  | 1  | 1  | 1  |
| HPY1204 | 15482 | HP1 | 1 | 1  | 1  | 0  | 1  | 1  | 1  |
| HPY1205 | 15483 | HP1 | 1 | 1  | 1  | 1  | 1  | 1  | 1  |
| HPY1206 | 15484 | HP1 | 1 | 1  | 1  | 1  | 1  | 1  | 1  |
| HPY1207 | 15485 | HP1 | 1 | 1  | 1  | 1  | 1  | 1  | 1  |
| HPY1208 | 15486 | HP1 | 1 | 1  | 1  | 1  | 1  | 1  | 0  |
| HPY1668 | 15946 | JHF | 1 | -1 | 0  | -1 | -1 | 1  | 1  |
| HPY1209 | 15487 | HP1 | 1 | 1  | -1 | -1 | 1  | -1 | -1 |
| HPY1210 | 15488 | HP1 | 1 | 1  | 1  | 1  | 1  | 1  | 1  |
| HPY1211 | 15489 | HP1 | 1 | 0  | 1  | 0  | 1  | 1  | 1  |
| HPY1212 | 15490 | HP1 | 1 | -1 | 1  | 0  | 1  | 1  | 1  |
| HPY1213 | 15491 | HP1 | 1 | 1  | 1  | 1  | 0  | 1  | 1  |
| HPY1214 | 15492 | HP1 | 1 | 1  | 1  | 1  | 1  | 1  | 1  |
| HPY1215 | 15493 | HP1 | 1 | 1  | 1  | 1  | 1  | 0  | 0  |
| HPY1216 | 15494 | HP1 | 1 | 1  | 1  | 1  | 1  | 1  | 1  |
| HPY1217 | 15495 | HP1 | 1 | 1  | 1  | 1  | 0  | 0  | 1  |
| HPY1218 | 15496 | HP1 | 1 | 1  | 1  | 1  | 1  | 1  | 1  |
| HPY1219 | 15497 | HP1 | 1 | 1  | 1  | 1  | 1  | 1  | 1  |

|         |       |     |   |    |    |    |    |    |    |
|---------|-------|-----|---|----|----|----|----|----|----|
| HPY1220 | 15498 | HP1 | 1 | 1  | 1  | 1  | 1  | 1  | 1  |
| HPY1221 | 15499 | HP1 | 1 | 1  | 1  | 1  | 1  | 1  | 1  |
| HPY1222 | 15500 | HP1 | 1 | 1  | 1  | 1  | 1  | -1 | 1  |
| HPY1223 | 15501 | HP1 | 1 | 1  | 1  | 1  | 1  | 1  | 1  |
| HPY1224 | 15502 | HP1 | 1 | 1  | 1  | 1  | 1  | 0  | 1  |
| HPY1225 | 15503 | HP1 | 1 | 1  | 1  | 1  | 1  | 0  | 0  |
| HPY1226 | 15504 | HP1 | 1 | 1  | 1  | 1  | 1  | 1  | 1  |
| HPY1227 | 15505 | HP1 | 1 | 1  | 1  | 1  | 1  | 1  | 1  |
| HPY1228 | 15506 | HP1 | 1 |    | 1  | 1  | 0  | 1  |    |
| HPY1229 | 15507 | HP1 | 1 | 1  | 1  | 1  | 1  | 1  | 1  |
| HPY1230 | 15508 | HP1 | 1 | 0  | 1  | 1  | 1  | 1  | 1  |
| HPY1231 | 15509 | HP1 | 1 | 0  | 1  | 1  | 1  | 1  | 1  |
| HPY1232 | 15510 | HP1 | 1 | 1  | 1  | 1  | 1  | 1  | 1  |
| HPY1233 | 15511 | HP1 | 1 | 1  | 1  | 1  | 1  | 0  | 1  |
| HPY1234 | 15512 | HP1 | 1 | 1  | 1  | 1  | 1  | 1  | 1  |
| HPY1235 | 15513 | HP1 | 1 | 1  | 1  | 1  | 1  | 0  | 0  |
| HPY1236 | 15514 | HP1 | 1 | 1  | 1  | 1  | 1  | 1  | 1  |
| HPY1237 | 15515 | HP1 | 1 | 1  | 1  | 1  | 1  | 1  | 1  |
| HPY1238 | 15516 | HP1 | 1 | 1  | 1  | 1  | 1  | 1  | 1  |
| HPY1669 | 15947 | JHF | 1 | 0  | 0  | -1 | 0  | 1  | 1  |
| HPY1239 | 15517 | HP1 | 1 | 1  | 1  | 1  | 1  | 0  | 1  |
| HPY1240 | 15518 | HP1 | 1 | 1  | 1  | 1  | 1  | 1  | 1  |
| HPY1770 | 16048 | HP1 | 1 | 0  | 1  | 1  | 0  | 1  | 1  |
| HPY1242 | 15520 | HP1 | 1 | 1  | 1  | 1  | 1  | 1  | 1  |
| HPY1243 | 15521 | HP1 | 1 | -1 | -1 | -1 | -1 | 1  | 1  |
| HPY1244 | 15522 | HP1 | 1 | 1  | 1  | 0  | 1  | 1  | 1  |
| HPY1245 | 15523 | HP1 | 1 | 1  | 1  | 1  | 1  | 1  | 1  |
| HPY1246 | 15524 | HP1 | 1 | 1  | 1  | 1  | 1  | 1  | 1  |
| HPY1713 | 15991 | HP1 | 1 | 1  | 1  | 1  | 1  | 1  | 1  |
| HPY1720 | 15998 | HP1 | 1 | 1  | 1  | 1  | 1  | 1  | 1  |
| HPY1249 | 15527 | HP1 | 1 | 1  | 1  | 1  | 0  | 1  | 1  |
| HPY1250 | 15528 | HP1 | 1 | 1  | 1  | 1  | 0  | 0  | 1  |
| HPY1251 | 15529 | HP1 | 1 | 1  | 1  | 1  | 1  | 1  | 1  |
| HPY1709 | 15987 | HP1 | 1 | 1  | 1  | 1  | 1  | 1  | 1  |
| HPY1253 | 15531 | HP1 | 1 | 1  | 1  | 1  | 1  | 1  | 1  |
| HPY1254 | 15532 | HP1 | 1 | 1  | 1  | 1  | 1  | 1  | 1  |
| HPY1255 | 15533 | HP1 | 1 | 1  | 1  | 1  | 1  | 1  | 1  |
| HPY1256 | 15534 | HP1 | 1 | 1  | 1  | 1  | 1  | 1  | 1  |
| HPY1257 | 15535 | HP1 | 1 | 1  | 1  | 1  | 0  | 1  | 1  |
| HPY1258 | 15536 | HP1 | 1 | 1  | 1  | 1  | 1  | 1  | 1  |
| HPY1259 | 15537 | HP1 | 1 | 1  | 1  | 1  | 1  | 1  | 1  |
| HPY1260 | 15538 | HP1 | 1 | 1  | 1  | 1  | 1  | 1  | -1 |
| HPY1261 | 15539 | HP1 | 1 | 1  | 1  | 1  | 1  | 1  | 1  |
| HPY1262 | 15540 | HP1 | 1 | 1  | 1  | 1  | 1  | 1  | 1  |
| HPY1263 | 15541 | HP1 | 1 | 1  | 1  | 1  | 1  | 1  | 1  |
| HPY1264 | 15542 | HP1 | 1 | 1  | 1  | 1  | 1  | 1  | 1  |
| HPY1712 | 15990 | HP1 | 1 | 1  | 1  | 1  | 1  | 1  | 0  |
| HPY1266 | 15544 | HP1 | 1 | 1  | 1  | 1  | 1  | 1  | 1  |
| HPY1267 | 15545 | HP1 | 1 | 1  | 1  | 1  | 1  | 1  | 1  |
| HPY1268 | 15546 | HP1 | 1 | 1  | 1  | 1  | 1  | 1  | 1  |
| HPY1269 | 15547 | HP1 | 1 | 1  | 1  | 1  | 1  | 1  | 1  |
| HPY1270 | 15548 | HP1 | 1 | 1  | 1  | 1  | 1  | 1  | 1  |
| HPY1721 | 15999 | HP1 | 1 | 1  | 1  | 0  | 1  | 1  | 1  |
| HPY1272 | 15550 | HP1 | 1 | 1  | 1  | 1  | 1  | 1  | 1  |
| HPY1273 | 15551 | HP1 | 1 | 1  | 1  | 1  | 1  | 1  | 1  |



|         |       |     |   |    |    |    |    |    |    |
|---------|-------|-----|---|----|----|----|----|----|----|
| HPY1274 | 15552 | HP1 | 1 | 1  | 1  | 1  | 1  | 1  | 1  |
| HPY1275 | 15553 | HP1 | 1 | 1  | 1  | 1  | 1  | 1  | 1  |
| HPY1276 | 15554 | HP1 | 1 | 0  | 0  | 0  | 0  | -1 | -1 |
| HPY1277 | 15555 | HP1 | 1 | 1  | 1  | 1  | 0  | 1  | 1  |
| HPY1278 | 15556 | HP1 | 1 | 1  | 1  | 1  | 1  | 1  | 1  |
| HPY1279 | 15557 | HP1 | 1 | 1  | 1  | 1  | 1  | 1  | 1  |
| HPY1280 | 15558 | HP1 | 1 | 0  | 1  | 1  | 1  | 1  | 0  |
| HPY1281 | 15559 | HP1 | 1 | 1  | 1  | 1  | 1  | 1  | 1  |
| HPY1282 | 15560 | HP1 | 1 | 1  | 1  | -1 | 1  |    | 0  |
| HPY1283 | 15561 | HP1 | 1 | -1 | -1 | -1 | 1  | -1 | -1 |
| HPY1284 | 15562 | HP1 | 1 | 1  | 1  | 1  | 1  | 1  | 1  |
| HPY1733 | 16011 | HP1 | 1 | 1  | 1  | 1  | 1  | 1  | 1  |
| HPY1286 | 15564 | HP1 | 1 | 0  | 1  | 1  | 1  | 1  | 1  |
| HPY1287 | 15565 | HP1 | 1 | 1  | 1  | 1  | 1  | 1  | 1  |
| HPY1288 | 15566 | HP1 | 1 | -1 | 0  | -1 | -1 | 1  | -1 |
| HPY1289 | 15567 | HP1 | 1 | 0  | 1  | 1  | -1 | 1  | 0  |
| HPY1706 | 15984 | HP1 | 1 | 1  | 1  | 1  | 1  | 1  | 1  |
| HPY1693 | 15971 | HP1 | 1 | 1  | 1  | 1  | 1  | 1  | 1  |
| HPY1292 | 15570 | HP1 | 1 | 1  | 1  | 1  | 1  | 1  | 1  |
| HPY1293 | 15571 | HP1 | 1 | 1  | 1  | 1  | 1  | 1  | 1  |
| HPY1294 | 15572 | HP1 | 1 | 1  | 1  | 1  | 1  | 1  | 1  |
| HPY1295 | 15573 | HP1 | 1 | 0  | 1  | 0  | 1  | 1  | 1  |
| HPY1296 | 15574 | HP1 | 1 | 1  | 1  | 1  | 1  | 1  | 1  |
| HPY1297 | 15575 | HP1 | 1 | 1  | 1  | 0  | 1  | 1  | 1  |
| HPY1789 | 16067 | HP1 | 1 | 0  | 1  | 0  | 1  | 1  | 1  |
| HPY1299 | 15577 | HP1 | 1 | 1  | 1  | 1  | 1  | 1  | 1  |
| HPY1300 | 15578 | HP1 | 1 | 1  | 1  | 1  | 1  | 1  | 1  |
| HPY1301 | 15579 | HP1 | 1 | 1  | 1  | 1  | 1  | 1  | 1  |
| HPY1302 | 15580 | HP1 | 1 | 1  | 1  | 1  | 1  | 1  | 1  |
| HPY1303 | 15581 | HP1 | 1 | 1  | 1  | 1  | 1  | 1  | 1  |
| HPY1304 | 15582 | HP1 | 1 | 1  | 1  | 1  | 1  | 1  | 1  |
| HPY1305 | 15583 | HP1 | 1 | 1  | 1  | 1  | 0  | 1  | 1  |
| HPY1306 | 15584 | HP1 | 1 | 1  | 1  | 1  | 1  | 1  | 1  |
| HPY1728 | 16006 | HP1 | 1 | 1  | 1  | 1  | 1  | 1  | 1  |
| HPY1308 | 15586 | HP1 | 1 | 1  | 1  | 0  | 1  | 1  | 1  |
| HPY1309 | 15587 | HP1 | 1 | 1  | 1  | 1  | 1  | 1  | 1  |
| HPY1310 | 15588 | HP1 | 1 | 1  | 1  | 1  | 1  | 1  | 1  |
| HPY1311 | 15589 | HP1 | 1 | 1  | 0  | 0  | 1  | 1  | 0  |
| HPY1312 | 15590 | HP1 | 1 | 0  | 1  | 1  | 1  | 1  | 1  |
| HPY1313 | 15591 | HP1 | 1 | 1  | 1  | 1  | 1  | 1  | 1  |
| HPY1314 | 15592 | HP1 | 1 | 1  | 1  | 1  | 1  | 1  | 1  |
| HPY1747 | 16025 | HP1 | 1 | 1  | 1  | 1  | 0  | 1  | 1  |
| HPY1316 | 15594 | HP1 | 1 | 1  | 1  | 1  | 1  | 1  | 1  |
| HPY1317 | 15595 | HP1 | 1 | 0  | 1  | 0  | 0  | 1  | 1  |
| HPY1318 | 15596 | HP1 | 1 | 0  | 1  | 1  | 1  | 1  | 1  |
| HPY1319 | 15597 | HP1 | 1 | 1  | 1  | 1  | 1  | 1  | 1  |
| HPY1320 | 15598 | HP1 | 1 | 1  | 1  | 1  | 1  | 1  | 1  |
| HPY1321 | 15599 | HP1 | 1 | 1  | 1  | 1  | 0  | 1  | 1  |
| HPY1322 | 15600 | HP1 | 1 | 0  | 1  | 1  | 1  | 1  | 1  |
| HPY1323 | 15601 | HP1 | 1 | 1  | 1  | 1  | 1  | 1  | 1  |
| HPY1324 | 15602 | HP1 | 1 | -1 | 0  | -1 | 1  | 1  | 1  |
| HPY1325 | 15603 | HP1 | 1 | 1  | 1  | 1  | 1  | 1  | 1  |
| HPY1326 | 15604 | HP1 | 1 | 1  | 1  | 1  | 1  | 1  | 1  |
| HPY1327 | 15605 | HP1 | 1 | 1  | 1  | 1  | 1  | 1  | 1  |
| HPY1328 | 15606 | HP1 | 1 | 1  | 1  | 1  | 1  | 1  | 1  |

|         |       |     |   |    |    |    |    |    |    |
|---------|-------|-----|---|----|----|----|----|----|----|
| HPY1329 | 15607 | HP1 | 1 | 1  | 1  | 1  | 1  | 1  | 1  |
| HPY1330 | 15608 | HP1 | 1 | 1  | 1  | 1  | 1  | 1  | 1  |
| HPY1331 | 15609 | HP1 | 1 | 1  | 1  | 0  | 1  | 1  | 1  |
| HPY1332 | 15610 | HP1 | 1 | 1  | 1  | 1  | 1  | 1  | 1  |
| HPY1333 | 15611 | HP1 | 1 | 1  | 1  | 1  | 1  | 1  | 1  |
| HPY1334 | 15612 | HP1 | 1 | -1 | -1 | -1 | 1  | -1 | -1 |
| HPY1335 | 15613 | HP1 | 1 | 1  | 1  | 1  | 1  | 1  | 1  |
| HPY1336 | 15614 | HP1 | 1 | 0  | 0  | 0  | 0  | 1  | 0  |
| HPY1337 | 15615 | HP1 | 1 | 1  | 1  | 1  | 1  | 1  | 1  |
| HPY1338 | 15616 | HP1 | 1 | 1  | 1  | 1  | 1  | 1  | 1  |
| HPY1339 | 15617 | HP1 | 1 | 1  | 1  | 1  | 1  | 1  | 1  |
| HPY1340 | 15618 | HP1 | 1 | 1  | 1  | 1  | 1  | 1  | 1  |
| HPY1341 | 15619 | HP1 | 1 | 1  | 1  | 1  | 0  | 1  | 1  |
| HPY1342 | 15620 | HP1 | 1 | -1 | 1  | 0  | 1  | -1 | 1  |
| HPY1343 | 15621 | HP1 | 1 | 1  | 1  | 1  | 0  | 1  | 1  |
| HPY1344 | 15622 | HP1 | 1 | 0  | 1  | 1  | 1  | 1  | 1  |
| HPY1345 | 15623 | HP1 | 1 | 1  | 1  | 1  | 1  | 1  | 1  |
| HPY1346 | 15624 | HP1 | 1 | 1  | 1  | 1  | 1  | 1  | 1  |
| HPY1347 | 15625 | HP1 | 1 | 1  | 1  | 1  | 1  | 1  | 1  |
| HPY1348 | 15626 | HP1 | 1 | 1  | 1  | 1  | 1  | 1  | 1  |
| HPY1349 | 15627 | HP1 | 1 | 1  | 1  | 1  | 1  | 1  | 1  |
| HPY1350 | 15628 | HP1 | 1 | 1  | 1  | 1  | 1  | 1  | 1  |
| HPY1351 | 15629 | HP1 | 1 | -1 | 0  | 0  | -1 | 1  | 0  |
| HPY1352 | 15630 | HP1 | 1 | -1 | 0  | 0  | -1 | 1  | -1 |
| HPY1692 | 15970 | HP1 | 1 | 1  | 1  | 1  | 0  | 1  | 0  |
| HPY1354 | 15632 | HP1 | 1 | 1  | 1  | 1  | 1  | 0  | 1  |
| HPY1355 | 15633 | HP1 | 1 | 1  | 1  | 1  | 0  | 0  | 1  |
| HPY1356 | 15634 | HP1 | 1 | 1  | 1  | 1  | 1  | 1  | 1  |
| HPY1357 | 15635 | HP1 | 1 | 1  | 1  | 1  | 0  | 1  | 1  |
| HPY1358 | 15636 | HP1 | 1 | 1  | 1  | 1  | 1  | 1  | 1  |
| HPY1359 | 15637 | HP1 | 1 | 1  | 1  | 1  | 0  | 1  | 1  |
| HPY1780 | 16058 | HP1 | 1 | 1  | 1  | 1  | 1  | 0  | 0  |
| HPY1361 | 15639 | HP1 | 1 | 1  | 1  | 1  | 1  | 1  | 1  |
| HPY1362 | 15640 | HP1 | 1 | 1  | 1  | 1  | 1  | 1  | 1  |
| HPY1363 | 15641 | HP1 | 1 | 0  | 1  | 1  | 1  | 1  | 1  |
| HPY1696 | 15974 | HP1 | 1 | 1  | 1  | 1  | 1  | 1  | 1  |
| HPY1365 | 15643 | HP1 | 1 | 1  | 1  | 1  | 0  | 1  | 0  |
| HPY1366 | 15644 | HP1 | 1 | -1 | 1  | 1  | -1 | 0  | 0  |
| HPY1367 | 15645 | HP1 | 1 | -1 | 1  | 1  | -1 | -1 | -1 |
| HPY1368 | 15646 | HP1 | 1 | -1 | 1  | 1  | -1 | -1 | 1  |
| HPY1369 | 15647 | HP1 | 1 | 1  | 1  | 1  | 0  | -1 | 1  |
| HPY1370 | 15648 | HP1 | 1 | 0  | 0  | 0  | 0  | 0  | 0  |
| HPY1764 | 16042 | HP1 | 1 | 1  | 1  | 1  | 1  | 1  | 1  |
| HPY1372 | 15650 | HP1 | 1 | 1  | 1  | 1  | 0  | 1  | 1  |
| HPY1373 | 15651 | HP1 | 1 | 1  | 1  | 1  | 1  | 1  | 1  |
| HPY1374 | 15652 | HP1 | 1 | 1  | 1  | 1  | 1  | 1  | 1  |
| HPY1375 | 15653 | HP1 | 1 | 0  | 1  | 1  | 1  | 1  | 1  |
| HPY1376 | 15654 | HP1 | 1 | 1  | 1  | 1  | 0  | 1  | 1  |
| HPY1377 | 15655 | HP1 | 1 | 1  | 1  | 1  | 1  | 1  | 1  |
| HPY1378 | 15656 | HP1 | 1 | 1  | 1  | 1  | 1  | 1  | 1  |
| HPY1379 | 15657 | HP1 | 1 | 1  | 1  | 1  | 1  | 1  | 1  |
| HPY1380 | 15658 | HP1 | 1 | 1  | 1  | 1  | 0  | 1  | 1  |
| HPY1381 | 15659 | HP1 | 1 | -1 | -1 | 0  | 0  | -1 | 0  |
| HPY1382 | 15660 | HP1 | 1 | 0  | 1  | 1  | 1  | 1  | 1  |
| HPY1671 | 15949 | JHF | 1 | 0  | 0  | 0  | 0  | 1  | 1  |

|         |       |     |   |    |    |    |    |    |    |
|---------|-------|-----|---|----|----|----|----|----|----|
| HPY1785 | 16063 | JHF | 1 | 0  | 1  | 1  | 1  | 1  | 1  |
| HPY1383 | 15661 | HP1 | 1 | 0  | 1  | 1  | 1  | 0  | 0  |
| HPY1384 | 15662 | HP1 | 1 | 1  | 1  | 1  | 0  | 1  | 1  |
| HPY1385 | 15663 | HP1 | 1 | 1  | 1  | 1  | 1  | 1  | 1  |
| HPY1386 | 15664 | HP1 | 1 | 1  | 1  | 1  | 1  | 1  | 1  |
| HPY1387 | 15665 | HP1 | 1 | 1  | 1  | 1  | 1  | 1  | 1  |
| HPY1717 | 15995 | HP1 | 1 | -1 | 1  | 1  | -1 | -1 | -1 |
| HPY1389 | 15667 | HP1 | 1 | -1 | 1  | 1  | 1  | -1 | 0  |
| HPY1390 | 15668 | HP1 | 1 | -1 | -1 | -1 | -1 | -1 | -1 |
| HPY1678 | 15956 | JHF | 1 | -1 | 0  | -1 | 0  | 1  | -1 |
| HPY1391 | 15669 | HP1 | 1 | 1  | 1  | 1  | 1  | 1  | 1  |
| HPY1392 | 15670 | HP1 | 1 | 1  | 1  | 1  | 1  | 1  | 1  |
| HPY1393 | 15671 | HP1 | 1 | 1  | 1  | 1  | 1  | 1  | 1  |
| HPY1394 | 15672 | HP1 | 1 | 1  | 1  | 1  | 1  | 0  | 1  |
| HPY1395 | 15673 | HP1 | 1 | 1  | 1  | 1  | 1  | 0  | 1  |
| HPY1396 | 15674 | HP1 | 1 | -1 | 0  | -1 | -1 | 0  | 0  |
| HPY1397 | 15675 | HP1 | 1 | 0  | 0  | 0  | 1  | -1 | -1 |
| HPY1398 | 15676 | HP1 | 1 | 0  | 1  | 1  | 1  | 1  | 1  |
| HPY1677 | 15955 | JHF | 1 | -1 | -1 | -1 | -1 | 1  | 1  |
| HPY1399 | 15677 | HP1 | 1 | 1  | 1  | 1  | 1  | 1  | 1  |
| HPY1400 | 15678 | HP1 | 1 | 1  | 1  | 1  | 1  | 1  | 1  |
| HPY1401 | 15679 | HP1 | 1 | 1  | 1  | 1  | 1  | 1  | 1  |
| HPY1763 | 16041 | HP1 | 1 | 0  | 1  | 1  | 1  | 1  | 1  |
| HPY1403 | 15681 | HP1 | 1 | 1  | 1  | 1  | 1  | 1  | 0  |
| HPY1676 | 15954 | JHF | 1 | -1 | 1  | 1  | -1 | 1  | -1 |
| HPY1404 | 15682 | HP1 | 1 | 0  | 0  | 1  | -1 | -1 | -1 |
| HPY1405 | 15683 | HP1 | 1 | 0  | 0  | 0  | 0  | 1  | 0  |
| HPY1406 | 15684 | HP1 | 1 | 1  | 1  | 1  | 1  | 1  | 1  |
| HPY1407 | 15685 | HP1 | 1 | 1  | 1  | 1  | 1  | 1  | 1  |
| HPY1408 | 15686 | HP1 | 1 | -1 | 1  | 0  | 0  | -1 | 1  |
| HPY1409 | 15687 | HP1 | 1 | 0  | 0  | 0  | 0  | 0  | -1 |
| HPY1410 | 15688 | HP1 | 1 | 1  | 1  | 1  | 0  | 0  | -1 |
| HPY1411 | 15689 | HP1 | 1 | 0  | 1  | 1  | 0  | 0  | -1 |
| HPY1673 | 15951 | JHF | 1 | 0  | 0  | 0  | -1 | 1  | -1 |
| HPY1412 | 15690 | HP1 | 1 | -1 | 1  | 1  | -1 | -1 | -1 |
| HPY1413 | 15691 | HP1 | 1 | 1  | 1  | 0  | 1  | 0  | 1  |
| HPY1414 | 15692 | HP1 | 1 | 1  | 1  | 1  | 1  | 1  | 1  |
| HPY1415 | 15693 | HP1 | 1 | 1  | 1  | 1  | 0  | 1  | 1  |
| HPY1416 | 15694 | HP1 | 1 | 1  | 1  | 1  | 1  | 1  | 0  |
| HPY1417 | 15695 | HP1 | 1 | 0  | 1  | 1  | -1 | 1  | 1  |
| HPY1418 | 15696 | HP1 | 1 | 1  | 1  | 0  | 0  | 0  | -1 |
| HPY1419 | 15697 | HP1 | 1 | 1  | 1  | 1  | 1  | 1  | 0  |
| HPY1420 | 15698 | HP1 | 1 | 1  | 1  | 1  | 1  | 1  | 1  |
| HPY1421 | 15699 | HP1 | 1 | 1  | 1  | 1  | 1  | 1  | 1  |
| HPY1423 | 15701 | HP1 | 1 | 1  | 1  | 1  | 0  | -1 | 0  |
| HPY1424 | 15702 | HP1 | 1 | 1  | 1  | 1  | 1  | -1 | 0  |
| HPY1425 | 15703 | HP1 | 1 | 1  | 1  | 1  | 1  | -1 | -1 |
| HPY1737 | 16015 | HP1 | 1 | 1  | 1  | 0  | 1  | -1 | -1 |
| HPY1427 | 15705 | HP1 | 1 | 1  | 1  | 1  | 1  | 1  | 0  |
| HPY1428 | 15706 | HP1 | 1 | 1  | 1  | 1  | 1  | 1  | 1  |
| HPY1429 | 15707 | HP1 | 1 | 1  | 1  | 1  | 1  | 1  | 1  |
| HPY1430 | 15708 | HP1 | 1 | 1  | 1  | 1  | 1  | 1  | 1  |
| HPY1431 | 15709 | HP1 | 1 | 1  | 1  | 1  | 1  | 1  | 1  |
| HPY1432 | 15710 | HP1 | 1 | 1  | 1  | 1  | 0  | 0  | 0  |
| HPY1433 | 15711 | HP1 | 1 | -1 | -1 | -1 | -1 | -1 | 0  |

|         |       |     |   |    |    |    |    |    |    |
|---------|-------|-----|---|----|----|----|----|----|----|
| HPY1434 | 15712 | HP1 | 1 | 1  | 1  | 1  | 1  | 1  | 1  |
| HPY1435 | 15713 | HP1 | 1 | 0  | 1  | 1  | 1  | 1  | 1  |
| HPY1436 | 15714 | HP1 | 1 | 1  | 1  | 1  | 1  | 0  | 1  |
| HPY1437 | 15715 | HP1 | 1 | 0  | 0  | 0  | -1 | 0  | 1  |
| HPY1438 | 15716 | HP1 | 1 | -1 | -1 | -1 | 1  | -1 | 1  |
| HPY1439 | 15717 | HP1 | 1 | -1 | 1  | 1  | 1  | 0  | -1 |
| HPY1440 | 15718 | HP1 | 1 | 0  | 1  | 1  | 1  | 1  | 1  |
| HPY1441 | 15719 | HP1 | 1 | 1  | 1  | 1  | 1  | 1  | 1  |
| HPY1442 | 15720 | HP1 | 1 | 1  | 1  | 1  | 1  | 1  | 1  |
| HPY1443 | 15721 | HP1 | 1 | 1  | 1  | 1  | 1  | 0  | 0  |
| HPY1444 | 15722 | HP1 | 1 | 1  | 1  | 1  | 1  | 1  | 0  |
| HPY1445 | 15723 | HP1 | 1 | 1  | 1  | 1  | 1  | 1  | 1  |
| HPY1446 | 15724 | HP1 | 1 | 1  | 1  | 1  | 1  | 1  | 1  |
| HPY1447 | 15725 | HP1 | 1 | 1  | 1  | 1  | 1  | 1  | 1  |
| HPY1448 | 15726 | HP1 | 1 | 0  | 1  | 1  | 0  | 0  | 0  |
| HPY1449 | 15727 | HP1 | 1 | 1  | 1  | 1  | 1  | 1  | 1  |
| HPY1450 | 15728 | HP1 | 1 | 1  | 1  | 1  | 1  | 1  | 1  |
| HPY1451 | 15729 | HP1 | 1 | 1  | 1  | 1  | 1  | 0  | 1  |
| HPY1690 | 15968 | HP1 | 1 | 1  | 1  | 1  | 1  | 1  | 1  |
| HPY1453 | 15731 | HP1 | 1 | 0  | 1  | 1  | 1  | 1  | 1  |
| HPY1454 | 15732 | HP1 | 1 | 1  | 1  | 1  | 1  | 1  | 1  |
| HPY1455 | 15733 | HP1 | 1 | 0  | 1  | 1  | 1  | 1  | 1  |
| HPY1456 | 15734 | HP1 | 1 | 0  | 1  | 1  | 1  | 1  | 0  |
| HPY1457 | 15735 | HP1 | 1 | 1  | 1  | 1  | 1  | 1  | 1  |
| HPY1458 | 15736 | HP1 | 1 | 1  | 1  | 1  | 0  | 1  | 0  |
| HPY1459 | 15737 | HP1 | 1 | 1  | 1  | 1  | 1  | 1  | 1  |
| HPY1460 | 15738 | HP1 | 1 | 1  | 1  | 1  | 1  | 1  | 1  |
| HPY1461 | 15739 | HP1 | 1 | 1  | 1  | 1  | 1  | 1  | 1  |
| HPY1462 | 15740 | HP1 | 1 | 1  | 1  | 1  | 1  | 1  | 1  |
| HPY1463 | 15741 | HP1 | 1 | 1  | 1  | 1  | 0  | 1  | 1  |
| HPY1464 | 15742 | HP1 | 1 | -1 | 1  | 1  | 0  | 1  | 1  |
| HPY1465 | 15743 | HP1 | 1 | 1  | 1  | 1  | 1  | 1  | 1  |
| HPY1466 | 15744 | HP1 | 1 | 1  | 1  | 1  | 1  | 1  | 1  |
| HPY1467 | 15745 | HP1 | 1 | 1  | 1  | 1  | 1  | 1  | 0  |
| HPY1468 | 15746 | HP1 | 1 | 1  | 1  | 1  | 1  | 1  | 1  |
| HPY1469 | 15747 | HP1 | 1 | 1  | 1  | 1  | 1  | 1  | 1  |
| HPY1768 | 16046 | HP1 | 1 | 1  | 1  | 1  | 1  | 1  | 0  |
| HPY1471 | 15749 | HP1 | 1 | -1 | 0  | 0  | 1  | 1  | 1  |
| HPY1472 | 15750 | HP1 | 1 | 1  | -1 | -1 | -1 | 1  | -1 |
| HPY1473 | 15751 | HP1 | 1 | 0  | 1  | 1  | 0  | 1  | 1  |
| HPY1474 | 15752 | HP1 | 1 | 1  | 1  | 1  | 1  | 1  | 1  |
| HPY1475 | 15753 | HP1 | 1 | 1  | 1  | 1  | 1  | 1  | 1  |
| HPY1476 | 15754 | HP1 | 1 | 1  | 1  | 1  | 1  | 1  | 1  |
| HPY1477 | 15755 | HP1 | 1 | 1  | 1  | 1  | 1  | 1  | 1  |
| HPY1478 | 15756 | HP1 | 1 | 1  | 1  | 1  | 1  | 1  | 0  |
| HPY1479 | 15757 | HP1 | 1 | 1  | 1  | 1  | 1  | 1  | 1  |
| HPY1480 | 15758 | HP1 | 1 | 1  | 1  | 1  | 1  | 1  | 1  |
| HPY1481 | 15759 | HP1 | 1 | 0  | 1  | 1  | 0  | 1  | 1  |
| HPY1482 | 15760 | HP1 | 1 | 0  | 1  | 1  | 1  | 1  | 1  |
| HPY1483 | 15761 | HP1 | 1 | 0  | 1  | 1  | 1  | 1  | 1  |
| HPY1484 | 15762 | HP1 | 1 | 1  | 1  | 1  | 1  | 0  | 0  |
| HPY1485 | 15763 | HP1 | 1 | 1  | 1  | 1  | 1  | 1  | 1  |
| HPY1689 | 15967 | HP1 | 1 | 1  | 1  | 1  | 0  | 1  | 1  |
| HPY1487 | 15765 | HP1 | 1 | 1  | 1  | 1  | 1  | 1  | 1  |
| HPY1488 | 15766 | HP1 | 1 | 1  | 1  | 1  | 1  | 1  | 1  |

|         |       |     |   |    |    |    |    |    |    |
|---------|-------|-----|---|----|----|----|----|----|----|
| HPY1489 | 15767 | HP1 | 1 | 1  | 1  | 1  | 0  | 0  | 0  |
| HPY1490 | 15768 | HP1 | 1 | 1  | 1  | 1  | 1  | 1  | 1  |
| HPY1491 | 15769 | HP1 | 1 | 1  | 1  | 1  | 1  | 1  | 1  |
| HPY1492 | 15770 | HP1 | 1 | 0  | 1  | 1  | 1  | 1  | 1  |
| HPY1493 | 15771 | HP1 | 1 | 1  | 1  | 1  | 1  | 1  | 1  |
| HPY1494 | 15772 | HP1 | 1 | 1  | 1  | 1  | 1  | 1  | 1  |
| HPY1495 | 15773 | HP1 | 1 | 1  | 1  | 1  | 1  | 1  | 1  |
| HPY1496 | 15774 | HP1 | 1 | 1  | 1  | 1  | 1  | 1  | 1  |
| HPY1702 | 15980 | HP1 | 1 | 0  | 1  | 1  | 0  | 0  | 0  |
| HPY1498 | 15776 | HP1 | 1 | 1  | 1  | 1  | 1  | 1  | 1  |
| HPY1499 | 15777 | HP1 | 1 | -1 | -1 | -1 | -1 | 1  | -1 |
| HPY1500 | 15778 | HP1 | 1 | 0  | 1  | 1  | 1  | 1  | 1  |
| HPY1501 | 15779 | HP1 | 1 | 1  | 1  | 1  | 1  | 1  | 1  |
| HPY1502 | 15780 | HP1 | 1 | 1  | 1  | 1  | 1  | 1  | 1  |
| HPY1773 | 16051 | HP1 | 1 | 1  | 1  | 1  | 1  | 1  | 1  |
| HPY1504 | 15782 | HP1 | 1 | 1  | 1  | 1  | 1  | 1  | 1  |
| HPY1505 | 15783 | HP1 | 1 | 1  | 1  | 1  | 1  | 1  | 1  |
| HPY1506 | 15784 | HP1 | 1 | 1  | 1  | 0  | 1  | 1  | 1  |
| HPY1507 | 15785 | HP1 | 1 | 1  | 1  | 1  | 1  | 1  | 1  |
| HPY1509 | 15787 | HP1 | 1 | 1  | 1  | 1  | 1  | 1  | 1  |
| HPY1510 | 15788 | HP1 | 1 | 1  | 1  | 1  | 1  | 0  | 0  |
| HPY1511 | 15789 | HP1 | 1 | -1 | 1  | 0  | 1  | 0  | 0  |
| HPY1512 | 15790 | HP1 | 1 | 0  | 1  | 1  | 1  | 1  | 1  |
| HPY1513 | 15791 | HP1 | 1 | 1  | 1  | 1  | 0  | 0  | 1  |
| HPY1715 | 15993 | HP1 | 1 | 1  | 1  | 1  | 1  | 0  | 1  |
| HPY1674 | 15952 | JHF | 1 | 0  | 0  | 0  | -1 | 1  | 1  |
| HPY1675 | 15953 | JHF | 1 | -1 | 1  | 0  | -1 | 1  | -1 |
| HPY1516 | 15794 | HP1 | 1 | 1  | 0  | 0  | -1 | -1 | -1 |
| HPY1517 | 15795 | HP1 | 1 | 0  | 1  | 1  | 0  | 1  | 0  |
| HPY1518 | 15796 | HP1 | 1 | 0  | 1  | 0  | 0  | 0  | 0  |
| HPY1519 | 15797 | HP1 | 1 | 1  | -1 | -1 | -1 | -1 | -1 |
| HPY1520 | 15798 | HP1 | 1 | 1  | -1 | -1 | -1 | -1 | -1 |
| HPY1521 | 15799 | HP1 | 1 | 0  | 1  | 1  | 1  | 1  | 1  |
| HPY1522 | 15800 | HP1 | 1 | -1 | 0  | -1 | -1 | -1 | -1 |
| HPY1730 | 16008 | HP1 | 1 | 0  | 1  | 1  | 1  | 1  | 1  |
| HPY1524 | 15802 | HP1 | 1 | 1  | 1  | 0  | 1  | 1  | 0  |
| HPY1525 | 15803 | HP1 | 1 | 1  | 1  | 1  | 1  | 1  | 1  |
| HPY1526 | 15804 | HP1 | 1 | 1  | 1  | 1  | 1  | 1  | 1  |
| HPY1527 | 15805 | HP1 | 1 | 1  | 1  | 1  | 1  | 1  | 1  |
| HPY1528 | 15806 | HP1 | 1 | 0  | 1  | 1  | 1  | 1  | 1  |
| HPY1529 | 15807 | HP1 | 1 | 1  | 1  | 1  | 1  | 1  | 1  |
| HPY1732 | 16010 | HP1 | 1 | 1  | 1  | 0  | 0  | 1  | 0  |
| HPY1808 | 16086 | HP1 | 1 | 1  | 1  | 1  | 1  | 1  | 1  |
| HPY1532 | 15810 | HP1 | 1 | 1  | 1  | 1  | 1  | 1  | 1  |
| HPY1533 | 15811 | HP1 | 1 | 0  | 1  | 1  | 1  | 1  | 1  |
| HPY1534 | 15812 | HP1 | 1 | -1 | 1  | 1  | -1 | -1 | -1 |
| HPY1535 | 15813 | HP1 | 1 | 0  | 1  | 1  | -1 | -1 | -1 |
| HPY1536 | 15814 | HP1 | 1 | 1  | 1  | 1  | 1  | 1  | -1 |
| HPY1537 | 15815 | HP1 | 1 | 1  | 1  | 1  | 1  | -1 | -1 |
| HPY1679 | 15957 | JHF | 1 | 1  | 1  | 1  | -1 | 1  | -1 |
| HPY1680 | 15958 | JHF | 1 | 0  | 1  | 1  | -1 | 1  | -1 |
| HPY1538 | 15816 | HP1 | 1 | 1  | 1  | 1  | 1  | 1  | 1  |
| HPY1539 | 15817 | HP1 | 1 | 1  | 1  | 1  | 1  | 1  | 1  |
| HPY1540 | 15818 | HP1 | 1 | 1  | 1  | 1  | 1  | 1  | 1  |
| HPY1761 | 16039 | HP1 | 1 | 1  | 1  | 1  | 1  | 1  | 1  |

|         |       |     |   |    |    |    |    |    |    |
|---------|-------|-----|---|----|----|----|----|----|----|
| HPY1784 | 16062 | HP1 | 1 | 0  | 0  | 0  | -1 | 1  | 1  |
| HPY1543 | 15821 | HP1 | 1 | 1  | 1  | 1  | 1  | 1  | 1  |
| HPY1544 | 15822 | HP1 | 1 | 1  | 1  | 1  | 1  | 1  | 1  |
| HPY1545 | 15823 | HP1 | 1 | 1  | 1  | 1  | 0  | 1  | 1  |
| HPY1546 | 15824 | HP1 | 1 | 1  | 1  | 1  | 1  | 1  | 0  |
| HPY1772 | 16050 | HP1 | 1 | 1  | 1  | 1  | 1  | 1  | 1  |
| HPY1548 | 15826 | HP1 | 1 | 1  | 1  | 1  | 1  | 0  | 1  |
| HPY1549 | 15827 | HP1 | 1 | 1  | 1  | 1  | 1  | 1  | 0  |
| HPY1550 | 15828 | HP1 | 1 | 1  | 1  | 1  | 1  | 1  | 1  |
| HPY1551 | 15829 | HP1 | 1 | 1  | 1  | 1  | 1  | 1  | 1  |
| HPY1705 | 15983 | HP1 | 1 | 1  | 1  | 1  | 1  | 1  | 1  |
| HPY1553 | 15831 | HP1 | 1 | 1  | 1  | 1  | 1  | 1  | 1  |
| HPY1554 | 15832 | HP1 | 1 | 1  | 1  | 1  | 1  | 1  | 1  |
| HPY1555 | 15833 | HP1 | 1 | 1  | 1  | 1  | 1  | 1  | 1  |
| HPY1556 | 15834 | HP1 | 1 | 1  | 1  | 1  | 1  | 1  | 1  |
| HPY1557 | 15835 | HP1 | 1 | 1  | 1  | 1  | 0  | 1  | 0  |
| HPY1558 | 15836 | HP1 | 1 | 1  | 1  | 1  | 1  | 1  | 1  |
| HPY1559 | 15837 | HP1 | 1 | 1  | 1  | 1  | 1  | 1  | 1  |
| HPY1560 | 15838 | HP1 | 1 | 1  | 1  | 1  | 1  | 1  | 1  |
| HPY1561 | 15839 | HP1 | 1 | 1  | 1  | 1  | 1  | 1  | 1  |
| HPY1562 | 15840 | HP1 | 1 | 1  | 1  | 1  | 1  | 1  | 1  |
| HPY1563 | 15841 | HP1 | 1 | 1  | 1  | 1  | 0  | 1  | 1  |
| HPY1564 | 15842 | HP1 | 1 | 1  | 1  | 1  | 1  | 1  | 1  |
| HPY1565 | 15843 | HP1 | 1 | 1  | 1  | 1  | 1  | 1  | 1  |
| HPY1566 | 15844 | HP1 | 1 | 1  | 1  | 1  | 1  | 1  | 1  |
| HPY1567 | 15845 | HP1 | 1 | 1  | 1  | 1  | 1  | 1  | 1  |
| HPY1568 | 15846 | HP1 | 1 | 1  | 1  | 1  | 1  | 1  | 1  |
| HPY1569 | 15847 | HP1 | 1 | 1  | 1  | 1  | 1  | 1  | 1  |
| HPY1570 | 15848 | HP1 | 1 | 1  | 1  | 1  | 1  | 1  | 1  |
| HPY1571 | 15849 | HP1 | 1 | 1  | 1  | 1  | 1  | 1  | 1  |
| HPY1572 | 15850 | HP1 | 1 | 1  | 1  | 1  | 1  | 1  | 0  |
| HPY1573 | 15851 | HP1 | 1 | 1  | 1  | 1  | 1  | 1  | 1  |
| HPY1574 | 15852 | HP1 | 1 | 0  | 1  | 1  | 1  | 1  | 1  |
| HPY1575 | 15853 | HP1 | 1 | 1  | 1  | 1  | 0  | 1  | 1  |
| HPY1576 | 15854 | HP1 | 1 | 1  | 1  | 1  | 1  | 1  | 1  |
| HPY1577 | 15855 | HP1 | 1 | 1  | 1  | 1  | 1  | 1  | 1  |
| HPY1578 | 15856 | HP1 | 1 | -1 | -1 | -1 | -1 | -1 | 0  |
| HPY1579 | 15857 | HP1 | 1 | 1  | 1  | 1  | 1  | -1 | 0  |
| HPY1580 | 15858 | HP1 | 1 | 1  | 1  | 1  | 1  | 1  | 1  |
| HPY1581 | 15859 | HP1 | 1 | 1  | 1  | 1  | 1  | 1  | 1  |
| HPY1582 | 15860 | HP1 | 1 | 1  | 1  | 1  | 1  | 1  | 0  |
| HPY1583 | 15861 | HP1 | 1 | 1  | 1  | 1  | 1  | 1  | 1  |
| HPY1584 | 15862 | HP1 | 1 | 1  | 1  | 1  | 1  | 1  | 1  |
| HPY1585 | 15863 | HP1 | 1 | 1  | 1  | 1  | 1  | 1  | 1  |
| HPY1586 | 15864 | HP1 | 1 | 0  | 1  | 0  | -1 | -1 | -1 |
| HPY1587 | 15865 | HP1 | 1 | -1 | 0  | 0  | 1  | 1  |    |
| HPY1588 | 15866 | HP1 | 1 | 1  | 1  | 0  | 1  | 1  | 1  |
| HPY1681 | 15959 | JHF | 1 | -1 | 0  | 0  | -1 | 1  | 1  |
| HPY1589 | 15867 | HP1 | 1 | 1  | -1 | -1 | 0  | -1 | -1 |
| HPY1590 | 15868 | HP1 | 1 | -1 | 1  | 0  | 1  | 0  | 0  |

















|    |    |    |    |    |    |    |    |    |
|----|----|----|----|----|----|----|----|----|
| 1  | 1  | 1  | 1  | 1  | 1  | 1  | 1  | 1  |
| 1  | 1  | 1  | 1  | 1  | 1  | 1  | 1  | 1  |
| 1  | 1  | 1  | 1  | 1  | 1  | 1  | 1  | 1  |
| 1  | 0  | 1  | 0  | 1  | 1  | 0  | 0  | 1  |
| 1  | 1  | 1  | 1  | 1  | 1  | 1  | 1  | 1  |
| 1  | 1  | 0  | 1  | 1  | 1  | 1  | 1  | 1  |
| 1  | 1  | 1  | 1  | 1  | 1  | 1  | 1  | 1  |
| 1  | 1  | 1  | 1  | 1  | 1  | 1  | 1  | 1  |
| 1  | 1  | 1  | 1  | 1  | 1  | 1  | 1  | 1  |
| 1  | 0  | 1  | 1  | 1  | 1  | 1  | 1  | 1  |
| 1  | 1  | 1  | 1  | 1  | 1  | 1  | 1  | 1  |
| 1  | 1  | 1  | 1  | 1  | 1  | 1  | 1  | 1  |
| 1  | 1  | 0  | 1  | 1  | 1  | 1  | 1  | 1  |
| 1  | 1  | 1  | 1  | 1  | 1  | 1  | 1  | 1  |
| 1  | 1  | 1  | 1  | 1  | 1  | 1  | 1  | 1  |
| 1  | 1  | 1  | 1  | 1  | 1  | 1  | 1  | 1  |
| 1  | 0  | 1  | 1  | 1  | 1  | 1  | 1  | 1  |
| 1  | 1  | 1  | 1  | 1  | 1  | 1  | 1  | 1  |
| 1  | 1  | 1  | 1  | 1  | 1  | 1  | 1  | 1  |
| 1  | 1  | 1  | 1  | 1  | 1  | 1  | 1  | 1  |
| 1  | 1  | 1  | 1  | 1  | 1  | 1  | 1  | 1  |
| 1  | 1  | 1  | 1  | 1  | 1  | 1  | 1  | 1  |
| 1  | 1  | 1  | 1  | 1  | 1  | 1  | 1  | 1  |
| 1  | 1  | 1  | 1  | 1  | 1  | 1  | 1  | 1  |
| 1  | 1  | 1  | 1  | 1  | 1  | 1  | 1  | 1  |
| 0  | 0  | -1 | 0  | 1  | -1 | -1 | -1 | 0  |
| -1 | 1  | -1 | -1 | -1 | -1 | -1 | 1  | -1 |
| -1 | 1  | -1 | -1 | -1 | -1 | -1 | 1  | -1 |
| 1  | 1  | 1  | 1  | 1  | 1  | 1  | 1  | 1  |
| 1  | 1  | 1  | 1  | 1  | 1  | 1  | 1  | 1  |
| 1  | 1  | 1  | 1  | 1  | 1  | 1  | 1  | 1  |
| 1  | 1  | 1  | 1  | 1  | 1  | 1  | 1  | 1  |
| 1  | 1  | 1  | 1  | 1  | 1  | 1  | 1  | 1  |
| 1  | 1  | 1  | 1  | 1  | 1  | 1  | 1  | 1  |
| 1  | 1  | 1  | 1  | 1  | 1  | 1  | 1  | 1  |
| 1  | 1  | 1  | 1  | 1  | 1  | 1  | 1  | 1  |
| 1  | 1  | 1  | 1  | 1  | 1  | 1  | 1  | 1  |
| -1 | -1 | -1 | -1 | -1 | -1 | -1 | -1 | -1 |
| 1  | -1 | 0  | -1 | 1  | 0  | 0  | 0  | 0  |
| 0  | -1 | 0  | 0  | 1  | 0  | 1  | 0  | 0  |
| 0  | -1 | 0  | -1 | 0  | -1 | 0  | 0  | 0  |
| 0  | -1 | 0  | 0  | 1  | 1  | 0  | 0  | 0  |
| 0  | -1 | -1 | -1 | -1 | 0  | -1 | -1 | 0  |
| -1 | -1 | 0  | -1 | -1 | -1 | -1 | -1 | -1 |
| 1  | -1 | -1 | -1 | -1 | -1 | -1 | -1 | -1 |
| 1  | -1 | -1 | -1 | 1  | -1 | -1 | -1 | -1 |
| 1  | 1  | 1  | 1  | 1  | 1  | 1  | 1  | 1  |
| -1 | 1  | -1 | -1 | -1 | -1 | -1 | -1 | 0  |
| 0  | 1  | 1  | 1  | 1  | 1  | -1 | -1 | 0  |
| 1  | 1  | 0  | 0  | 1  | 1  | 0  | 1  | 1  |
| 0  | 1  | 0  | 0  | 1  | 1  | 0  | 1  | 1  |
| -1 | 1  | -1 | -1 | -1 | -1 | -1 | -1 | -1 |
| 1  | 1  | -1 | 1  | 1  | 1  | -1 | -1 | -1 |
| 1  | 1  | -1 | 1  | 1  | 1  | 1  | -1 | -1 |
| 1  | 1  | -1 | 1  | 0  | 1  | 0  | 0  | -1 |
| 1  | 1  | -1 | 1  | -1 | 1  | 0  | -1 | -1 |
| 1  | 1  | -1 | -1 | -1 | -1 | -1 | -1 | -1 |

|    |   |    |    |    |    |    |    |    |
|----|---|----|----|----|----|----|----|----|
| 1  | 1 | -1 | -1 | 0  | -1 | -1 | -1 | -1 |
| 1  | 1 | -1 | -1 | -1 | -1 | -1 | -1 | -1 |
| 1  | 1 | -1 | -1 | 0  | -1 | -1 | -1 | -1 |
| -1 | 1 | -1 | 1  | 1  | 1  | 1  | 0  | -1 |
| -1 | 1 | -1 | 1  | 1  | 1  | 1  | 1  | -1 |
| -1 | 1 | -1 | -1 | 0  | -1 | -1 | -1 | -1 |
| -1 | 1 | -1 | -1 | -1 | -1 | -1 | -1 | -1 |
| -1 | 1 | -1 | -1 | -1 | -1 | -1 | 0  | -1 |
| -1 | 1 | -1 | -1 | -1 | -1 | -1 | 0  | -1 |
| 0  | 1 | -1 |    | -1 | -1 | -1 | -1 | -1 |
| -1 | 1 | -1 | -1 | -1 | -1 | -1 | 0  | -1 |
| -1 | 1 | -1 | -1 | -1 | -1 | -1 | -1 | -1 |
| -1 | 1 | -1 | -1 | -1 | -1 | -1 | -1 | -1 |
| -1 | 1 | -1 | -1 | -1 | -1 | -1 | -1 | -1 |
| -1 | 1 | -1 | -1 | -1 | -1 | -1 | -1 | -1 |
| -1 | 1 | -1 | -1 | -1 | -1 | -1 | -1 | -1 |
| 1  | 1 | -1 | -1 | -1 | -1 | -1 | -1 | -1 |
| 1  | 1 | -1 | -1 | 0  | 1  | -1 | -1 | -1 |
| 1  | 1 | -1 | 1  | 1  | 1  | -1 | -1 | -1 |
| -1 | 1 | -1 | -1 | 0  | -1 | -1 | -1 | 0  |
| -1 | 1 | 0  | -1 | -1 | -1 | -1 | -1 | 1  |
| -1 | 1 | -1 | -1 | -1 | -1 | -1 | -1 | 0  |
| -1 | 1 | 1  |    |    | -1 | -1 | -1 | 0  |
| -1 | 1 | 0  | -1 | -1 | -1 | -1 | -1 | 0  |
| -1 | 1 | 1  | -1 | -1 | -1 | -1 | -1 | -1 |
| -1 | 1 | -1 | 0  | -1 | -1 | -1 | -1 | 1  |
| 1  | 1 | 1  | 1  | 1  | 1  | 1  | 1  | 1  |
| 0  | 1 | 0  | 0  | 1  | 0  | 0  | 0  | 0  |
| 0  | 1 | 1  | 1  | 1  | 1  | 1  | 1  | 1  |
| 1  | 1 | 1  | 1  | 1  | 1  | 1  | 1  | 1  |
| 1  | 1 | 1  | 1  | 1  | 1  | 1  | 1  | 1  |
| 1  | 1 | 1  | 1  | 1  | 1  | 1  | 1  | 1  |
| 1  | 1 | 1  | 1  | 1  | 1  | 1  | 1  | 1  |
| 1  | 1 | 1  | 1  | 1  | 1  | 1  | 1  | 1  |
| 1  | 1 | 1  | 1  | 1  | 1  | 1  | 1  | 1  |
| 1  | 1 | 1  | 1  | 1  | 1  | 1  | 1  | 1  |
| 1  | 1 | 1  | 1  | 1  | 1  | 1  | 1  | 1  |
| 1  | 1 | 1  | 1  | 1  | 1  | 1  | 1  | 1  |
| 1  | 1 | 1  | 1  | 1  | 1  | 1  | 1  | 1  |
| 1  | 1 | 1  | 1  | 1  | 1  | 1  | 1  | 1  |
| 1  | 1 | 1  | 1  | 1  | 1  | 1  | 1  | 1  |
| 1  | 1 | 1  | 1  | 1  | 1  | 1  | 1  | 1  |
| 1  | 1 | 1  | 1  | 1  | 1  | 1  | 1  | 1  |
| 1  | 1 | 1  | 1  | 1  | 1  | 1  | 1  | 1  |
| 1  | 1 | 1  | 1  | 1  | 1  | 1  | 1  | 1  |
| 1  | 1 | 1  | 1  | 1  | 1  | 1  | 1  | 1  |
| 0  | 1 | -1 | -1 | 1  | 0  | 0  | 0  | 0  |
| 1  | 1 | 0  | 0  | 1  | 1  | 1  | 0  | 0  |
| 1  | 1 | 1  | 1  | 1  | 1  | 1  | 1  | 1  |
| 1  | 1 | 1  | 1  | 1  | 1  | 1  | 1  | 1  |
| 1  | 1 | 1  | 1  | 1  | 1  | 1  | 1  | 1  |
| 0  | 1 | -1 | -1 | 1  | 0  | 0  | 0  | 0  |
| 1  | 1 | 0  | 0  | 1  | 1  | 1  | 0  | 0  |
| 1  | 1 | 1  | 1  | 1  | 1  | 1  | 1  | 1  |
| 1  | 0 | 0  | 0  | 1  | 1  | 0  | 1  | 1  |

|    |   |    |    |   |    |   |   |    |
|----|---|----|----|---|----|---|---|----|
| 1  | 1 | 1  | 1  | 1 | 1  | 1 | 1 | 0  |
| 1  | 1 | 1  | 1  | 1 | 1  | 1 | 1 | 1  |
| 1  | 1 | 1  | 1  | 1 | 1  | 1 | 1 | 1  |
| 1  | 1 | 1  | 1  | 1 | 1  | 1 | 1 | 0  |
| 1  | 1 | -1 | 1  | 1 | 0  | 1 | 1 | 1  |
| 1  | 1 | 0  | 1  | 1 | 1  | 1 | 1 | 1  |
| 0  | 1 | 0  | 1  | 1 | 1  | 1 | 1 | 1  |
| 1  | 1 | 1  | 1  | 1 | 1  | 0 | 1 | 1  |
| 1  | 1 | 1  | 1  | 1 | 1  | 1 | 1 | 1  |
| 1  | 1 | 1  | 1  | 1 | 1  | 1 | 1 | 1  |
| 0  | 1 | 0  | 1  | 1 | 1  | 1 | 1 | 0  |
| 1  | 1 | 1  | 1  | 1 | 1  | 1 | 1 | 1  |
| 1  | 0 | -1 | 0  | 0 | 0  | 1 | 0 | 1  |
| 1  | 1 | 1  | 0  | 1 | 1  | 1 | 0 | 1  |
| 1  | 1 | 1  | 1  | 1 | 1  | 1 | 1 | 1  |
| 1  | 1 | 1  | 1  | 1 | 0  | 1 | 1 | 1  |
| 1  | 1 | 1  | 1  | 1 | 1  | 1 | 1 | 1  |
| 1  | 1 | 1  | 1  | 1 | 1  | 1 | 1 | 1  |
| 0  | 1 | 1  | 1  | 1 | 1  | 1 | 1 | 1  |
| 1  | 1 | -1 | -1 |   | 1  | 1 | 1 | 1  |
| -1 | 1 | -1 | -1 | 1 | 0  | 0 | 0 | 0  |
| 1  | 0 | -1 | 0  | 1 | 0  | 1 | 1 | 1  |
| 1  | 1 | 1  | 1  | 1 | 1  | 1 | 1 | 1  |
| 1  | 1 | 1  | 1  | 1 | 1  | 1 | 1 | 1  |
| 1  | 1 | 1  | 1  | 1 | 1  | 1 | 1 | 1  |
| 1  | 1 | 1  | 1  | 1 | 1  | 1 | 1 | 1  |
| 1  | 1 | 1  | 1  | 1 | 1  | 1 | 1 | 1  |
| 1  | 1 | 1  | 1  | 1 | 1  | 1 | 1 | 1  |
| 0  | 1 | 1  | 1  | 1 | 1  | 1 | 1 | 0  |
| 1  | 1 | 1  | 1  | 1 | 1  | 1 | 1 | 1  |
| -1 | 1 | 0  | 1  | 1 | 1  | 1 | 1 | 1  |
| -1 | 1 | 0  | 1  | 1 | 1  | 0 | 0 | 0  |
| -1 | 1 | 1  | 1  | 1 | 1  | 1 | 1 | 1  |
| -1 | 1 | 0  | 0  | 1 | 1  | 0 | 0 | 0  |
| -1 | 1 | 1  | 1  | 1 | 1  | 1 | 1 | 1  |
| -1 | 1 | 1  | 1  | 1 | 1  | 1 | 1 | 1  |
| -1 | 1 | 1  | 1  | 1 | 1  | 1 | 1 | 1  |
| -1 | 1 | 1  | 1  | 1 | 1  | 1 | 1 | 1  |
| -1 | 1 | 1  | 1  | 1 | 1  | 1 | 1 | 1  |
| -1 | 1 | 1  | 1  | 1 | 1  | 1 | 1 | -1 |
| -1 | 1 | 1  | 1  | 1 | 1  | 1 | 1 | -1 |
| -1 | 1 | 1  | 1  | 1 | 1  | 1 | 1 | -1 |
| -1 | 1 | 1  | 1  | 1 | 1  | 1 | 1 | -1 |
| -1 | 1 | 1  | 1  | 1 | 1  | 1 | 1 | -1 |
| -1 | 1 | 1  | 1  | 1 | 1  | 1 | 1 | -1 |
| -1 | 1 | 1  | 1  | 1 | 1  | 1 | 1 | -1 |
| -1 | 1 | 1  | 1  | 1 | 1  | 1 | 1 | -1 |
| -1 | 1 | 1  | 1  | 1 | 1  | 1 | 1 | -1 |
| -1 | 1 | 1  | 1  | 1 | 1  | 1 | 1 | -1 |
| -1 | 1 | 1  | 1  | 1 | 1  | 1 | 1 | -1 |
| -1 | 1 | 0  | 1  | 1 | 0  | 1 | 0 | -1 |
| -1 | 1 | 1  | 1  | 1 | 1  | 1 | 1 | -1 |
| -1 | 1 | 1  | 1  | 1 | 1  | 1 | 1 | -1 |
| -1 | 1 | 1  | 1  | 1 | 1  | 1 | 1 | -1 |
| -1 | 1 | 1  | 1  | 1 | 1  | 1 | 1 | -1 |
| -1 | 1 | 1  | 1  | 1 | 1  | 1 | 1 | -1 |
| -1 | 1 | 1  | 1  | 1 | 1  | 1 | 1 | -1 |
| -1 | 1 | 1  | 1  | 1 | 1  | 1 | 1 | -1 |
| -1 | 1 | 1  | 1  | 1 | 1  | 1 | 1 | -1 |
| -1 | 1 | 1  | 1  | 1 | 1  | 1 | 1 | -1 |
| -1 | 1 | 0  | 1  | 1 | 1  | 0 | 0 | -1 |
| -1 | 1 | 1  | 1  | 1 | 1  | 1 | 1 | -1 |
| -1 | 1 | 1  | 1  | 1 | 1  | 1 | 1 | -1 |
| 0  | 1 | 1  | 1  | 1 | 1  | 1 | 1 | -1 |
| 0  | 1 | 0  | 0  | 0 | -1 | 0 | 1 | -1 |



|   |   |   |   |   |   |   |   |    |
|---|---|---|---|---|---|---|---|----|
| 1 | 1 | 1 | 1 | 1 | 1 | 1 | 1 | 1  |
| 1 | 1 | 1 | 1 | 1 | 1 | 1 | 1 | 1  |
| 0 | 0 | 1 | 0 | 1 | 1 | 0 | 1 | 1  |
| 1 | 1 | 1 | 1 | 1 | 1 | 1 | 1 | 1  |
| 1 | 1 | 1 | 1 | 1 | 1 | 1 | 1 | 1  |
| 1 | 1 | 1 | 1 | 1 | 1 | 1 | 1 | 1  |
| 1 | 1 | 1 | 1 | 1 | 1 | 1 | 1 | 1  |
| 1 | 1 | 1 | 1 | 1 | 1 | 1 | 1 | 1  |
| 1 | 1 | 1 | 1 | 1 | 1 | 1 | 1 | 1  |
| 0 | 1 | 0 | 0 | 1 | 1 | 0 | 0 | 0  |
| 1 | 0 | 0 | 1 | 1 | 0 | 1 | 0 | -1 |
| 0 | 1 | 0 | 1 | 1 | 0 | 0 | 0 | 0  |
| 1 | 0 | 1 | 1 | 1 | 1 | 1 | 1 | 1  |
| 1 | 1 | 0 | 0 | 1 | 0 | 1 | 0 | 1  |
| 1 | 1 | 1 | 1 | 1 | 1 | 1 | 1 | 1  |
| 1 | 1 | 0 | 1 | 1 | 1 | 1 | 1 | 1  |
| 1 | 1 | 1 | 1 | 1 | 1 | 1 | 1 | 1  |
| 1 | 1 | 1 | 1 | 1 | 1 | 1 | 1 | 1  |
| 1 | 1 | 1 | 1 | 1 | 1 | 1 | 1 | 1  |
| 1 | 1 | 1 | 1 | 1 | 1 | 1 | 1 | 1  |
| 1 | 1 | 1 | 1 | 1 | 1 | 1 | 1 | 1  |
| 1 | 1 | 1 | 1 | 1 | 1 | 1 | 1 | 1  |
| 1 | 1 | 1 | 1 | 1 | 1 | 1 | 1 | 1  |
| 1 | 1 | 1 | 1 | 1 | 1 | 1 | 1 | 1  |
| 1 | 1 | 1 | 1 | 1 | 1 | 1 | 1 | 1  |
| 1 | 1 | 1 | 1 | 1 | 1 | 1 | 1 | 1  |
| 1 | 1 | 1 | 1 | 1 | 1 | 1 | 1 | 1  |
| 1 | 1 | 1 | 1 | 1 | 1 | 1 | 1 | 1  |
| 1 | 1 | 1 | 1 | 1 | 1 | 1 | 1 | 1  |
| 1 | 1 | 1 | 1 | 1 | 1 | 1 | 1 | 1  |
| 1 | 1 | 1 | 1 | 1 | 1 | 1 | 1 | 1  |
| 1 | 1 | 1 | 1 | 1 | 1 | 1 | 1 | 1  |
| 1 | 1 | 1 | 1 | 1 | 1 | 1 | 1 | 1  |
| 1 | 1 | 1 | 1 | 1 | 1 | 1 | 1 | 1  |
| 1 | 1 | 1 | 1 | 1 | 1 | 1 | 1 | 1  |
| 1 | 1 | 1 | 1 | 1 | 1 | 1 | 1 | 1  |
| 1 | 1 | 1 | 1 | 1 | 1 | 1 | 1 | 1  |
| 0 | 1 | 0 | 1 | 1 | 1 | 0 | 0 | 1  |
| 0 | 1 | 0 | 1 | 0 | 0 | 1 | 1 | 1  |
| 1 | 1 | 1 | 1 | 1 | 1 | 1 | 1 | 1  |
| 1 | 1 | 1 | 1 | 1 | 1 | 0 | 1 | 1  |
| 0 | 0 | 1 | 1 | 1 | 1 | 1 | 1 | 1  |





|    |   |    |    |    |    |    |    |    |
|----|---|----|----|----|----|----|----|----|
| -1 | 1 | 1  | 1  | 1  | 1  | 1  | 1  | 0  |
| -1 | 1 | 0  | 1  | 1  | 0  | 0  | 0  | -1 |
| 1  | 1 | 1  | 1  | 1  | 1  | 1  | 1  | 1  |
| 1  | 1 | 1  | 1  | 1  | 1  | 1  | 1  | 1  |
| 0  | 1 | 1  | 1  | 1  | 0  | 1  | 1  | 1  |
| 1  | 1 | 1  | 1  | 1  | 1  | 1  | 1  | 1  |
| 1  | 1 | 1  | 1  | 1  | 1  | 1  | 1  | 1  |
| 1  | 1 | 1  | 1  | 1  | 1  | 1  | 1  | 1  |
| 1  | 0 | 0  | 1  | 1  | 1  | 0  | 1  | 1  |
| 0  | 1 | 0  | 1  | 1  | 1  | 1  | 1  | 1  |
| -1 | 1 | 0  | 1  | -1 | -1 | 1  | 1  | -1 |
| 1  | 1 | 1  | 1  | 1  | 1  | 1  | 1  | 1  |
| 1  | 1 | 1  | 1  | 1  | 1  | 1  | 1  | 1  |
| 1  | 1 | 1  | 1  | 1  | 1  | 1  | 1  | 1  |
| 1  | 1 | 1  | 1  | 1  | 1  | 1  | 1  | 1  |
| 1  | 1 | 1  | 1  | 1  | 1  | 1  | 1  | 1  |
| 1  | 1 | 1  | 1  | 1  | 1  | 1  | 1  | 1  |
| 1  | 1 | 1  | 1  | 1  | 1  | 1  | 1  | 1  |
| 1  | 1 | 1  | 1  | 1  | 1  | 1  | 1  | 1  |
| 1  | 1 | 1  | 0  | 1  | 1  | 1  | 1  | 1  |
| 1  | 1 | 1  | 1  | 1  | 1  | 1  | 1  | 1  |
| 1  | 1 | 1  | 1  | 1  | 1  | 1  | 1  | 1  |
| 1  | 1 | 1  | 1  | 1  | 1  | 1  | 1  | 1  |
| 1  | 1 | 1  | 1  | 1  | 1  | 1  | 1  | 1  |
| 1  | 1 | 1  | 1  | 1  | 1  | 1  | 1  | 1  |
| 1  | 1 | 1  | 1  | 1  | 1  | 1  | 1  | 1  |
| 1  | 1 | 1  | 1  | 1  | 1  | 1  | 1  | 1  |
| 1  | 1 | 1  | 1  | 1  | 1  | 1  | 1  | 1  |
| 1  | 1 | 1  | 1  | 1  | 1  | 1  | 1  | 1  |
| 1  | 1 | 1  | 1  | 1  | 1  | 1  | 1  | 1  |
| 1  | 1 | 1  | 1  | 1  | 1  | 1  | 1  | 1  |
| 1  | 1 | 1  | 1  | 1  | 1  | 1  | 1  | 1  |
| 1  | 1 | 1  | 1  | 1  | 1  | 1  | 1  | 1  |
| 1  | 1 | 1  | 1  | 1  | 1  | 1  | 1  | 1  |
| 1  | 1 | 1  | 1  | 1  | 1  | 1  | 1  | 1  |
| 1  | 1 | 1  | 1  | 1  | 1  | 1  | 1  | 1  |
| 1  | 1 | 1  | 1  | 1  | 1  | 1  | 1  | 1  |
| 1  | 1 | 1  | 1  | 1  | 1  | 1  | 1  | 1  |
| 1  | 1 | 1  | 1  | 1  | 1  | 1  | 1  | 1  |
| 1  | 1 | 1  | 1  | 1  | 1  | 1  | 1  | 1  |
| 1  | 1 | 1  | 1  | 1  | 1  | 1  | 1  | 1  |
| 1  | 1 | 1  | 1  | 1  | 1  | 1  | 1  | 1  |
| 1  | 1 | 1  | 1  | 1  | 1  | 1  | 1  | 1  |
| 1  | 1 | 1  | 1  | 1  | 1  | 1  | 1  | 1  |
| 1  | 1 | 1  | 1  | 1  | 1  | 1  | 1  | 1  |
| 1  | 1 | 1  | 1  | 1  | 1  | 1  | 1  | 1  |
| 0  | 0 | 1  | 1  | 1  | 1  | 1  | 1  | 1  |
| 0  | 1 | 0  | 1  | 1  | 0  | 1  | 1  | 0  |
| 1  | 1 | 1  | 1  | 1  | 1  | 1  | 1  | 1  |
| 0  | 1 | 1  | 0  | 1  | 1  | 1  | 1  | 1  |
| 1  | 1 | 1  | 1  | 1  | 1  | 1  | 1  | 1  |
| 1  | 1 | 1  | 1  | 1  | 1  | 1  | 1  | 1  |
| 1  | 1 | 1  | 1  | 1  | 1  | 1  | 1  | 1  |
| 1  | 1 | 1  | 1  | 1  | 1  | 1  | 1  | 1  |
| 1  | 1 | 1  | 1  | 1  | 1  | 1  | 1  | 1  |
| 1  | 1 | 1  | 1  | 1  | 1  | 1  | 1  | 1  |
| 1  | 1 | 1  | 1  | 1  | 1  | 1  | 1  | 1  |
| 1  | 1 | 1  | 1  | 1  | 1  | 1  | 1  | 1  |
| 1  | 1 | 1  | 1  | 1  | 1  | 1  | 1  | 1  |
| 1  | 1 | 1  | 1  | 1  | 1  | 1  | 1  | 1  |
| 1  | 1 | 1  | 1  | 1  | 1  | 1  | 1  | 1  |
| 1  | 1 | 1  | 1  | 1  | 1  | 1  | 1  | 1  |
| 1  | 1 | 1  | 1  | 1  | 1  | 1  | 1  | 1  |
| 0  | 1 | 1  | 0  | 0  | 0  | 0  | 1  | 1  |
| -1 | 1 | -1 | -1 | -1 | -1 | -1 | -1 | -1 |
| -1 | 1 | -1 | -1 | 0  | -1 | -1 | -1 | -1 |
| 0  | 1 | 0  | 1  | 1  | 0  | 0  | 1  | -1 |











|    |    |    |    |    |    |    |    |    |
|----|----|----|----|----|----|----|----|----|
| 1  | 1  | 1  | 1  | 1  | 1  | 1  | 1  | 1  |
| -1 | -1 | -1 | -1 | -1 | -1 | -1 | -1 | -1 |
| -1 | 1  | 0  | 1  | 1  | 1  | 1  | 0  | 0  |
| 1  | 1  | 1  | 1  | 1  | 1  | 1  | 1  | 1  |
| -1 | 1  | -1 | 1  | 1  | 1  | 1  | 0  | -1 |
| 1  | 1  | 1  | 1  | 1  | 1  | 1  | 1  | 0  |
| -1 | -1 | 1  | -1 | -1 | -1 | -1 | -1 | -1 |
| -1 | -1 | 1  | 1  | -1 | -1 | -1 | -1 | -1 |
| -1 | -1 | -1 | 1  | -1 | -1 | -1 | -1 | -1 |
| -1 | -1 | -1 | 1  | -1 | -1 | -1 | -1 | -1 |
| -1 | -1 | -1 | 1  | 0  | -1 | -1 | -1 | -1 |
| -1 | -1 | -1 | 1  | -1 | -1 | -1 | -1 | -1 |
| -1 | -1 | -1 | 1  | -1 | -1 | -1 | -1 | -1 |
| -1 | -1 | -1 | 1  | -1 | -1 | -1 | -1 | -1 |
| -1 | -1 | -1 | -1 | -1 | -1 | -1 | -1 | -1 |
| -1 | -1 | -1 | -1 | -1 | -1 | -1 | -1 | -1 |
| -1 | -1 | -1 | 0  | -1 | -1 | -1 | 0  | 0  |
| -1 | -1 | -1 | 1  | -1 | -1 | -1 | -1 | 1  |
| -1 | -1 | -1 | -1 | -1 | -1 | -1 | -1 | -1 |
| -1 | -1 | -1 | -1 | -1 | -1 | -1 | -1 | -1 |
| -1 | -1 | -1 | -1 | -1 | -1 | -1 | -1 | 0  |
| -1 | -1 | -1 | -1 | -1 | -1 | -1 | -1 | 1  |
| -1 | -1 | -1 | -1 | -1 | -1 | -1 | -1 | 1  |
| -1 | -1 | 0  | -1 | -1 | -1 | -1 | -1 | 0  |
| -1 | -1 | -1 | -1 | -1 | -1 | -1 | -1 | 0  |
| -1 | -1 | -1 | -1 | -1 | -1 | -1 | -1 | 0  |
| -1 | -1 | -1 | -1 | -1 | -1 | -1 | -1 | 0  |
| 0  | 1  | -1 |    | 1  | 1  | -1 | -1 | -1 |
| -1 | 1  | -1 | 1  | 1  | 1  | 1  | -1 | -1 |
| 1  | 1  | -1 | 1  | 1  | 1  | 0  | -1 | -1 |
| -1 | 1  | -1 | -1 | -1 | -1 | -1 | -1 | -1 |
| -1 | 1  | -1 | 1  | 1  | 1  | 1  | 1  | -1 |
| -1 | 1  | -1 | 1  | 1  | 1  | 1  | 1  | -1 |
| -1 | 1  | -1 | -1 | -1 | -1 | -1 | -1 | 1  |
| -1 | 1  | -1 | -1 | -1 | -1 | -1 | -1 | 1  |
| -1 | -1 | -1 | -1 | -1 | -1 | -1 | -1 | -1 |
| -1 | 0  | -1 | -1 | -1 | -1 | -1 | -1 | 1  |
| -1 | 1  | 1  | -1 | 1  |    | -1 | -1 | 1  |
| -1 | 1  | 1  | -1 | -1 | -1 | -1 | -1 | 1  |
| -1 | 1  | -1 | -1 | -1 | -1 | -1 | -1 | 0  |
| -1 | 1  | -1 | -1 | -1 | -1 | -1 | -1 | 0  |
| -1 | -1 | -1 | -1 | -1 | -1 | -1 | -1 | -1 |
| -1 | -1 | -1 | 1  | 1  | -1 | -1 | -1 | -1 |
| -1 | -1 | -1 | 1  | 1  | -1 | -1 | -1 | -1 |
| -1 | -1 | -1 | -1 | -1 | -1 | -1 | -1 | -1 |
| -1 | -1 | -1 | -1 | -1 | -1 | -1 | -1 | -1 |
| -1 | -1 | -1 | -1 | -1 | -1 | -1 | -1 | -1 |
| -1 | -1 | 1  | -1 | -1 | -1 | -1 | -1 | -1 |
| -1 | -1 | -1 | -1 | -1 | -1 | -1 | -1 | -1 |
| -1 | 1  | -1 | 1  | 1  | 1  | 1  | 1  | -1 |
| -1 | 1  | -1 | 1  | 1  | 1  | 1  | 1  | -1 |
| -1 | 1  | -1 | 1  | -1 | -1 | -1 | 0  | -1 |
| -1 | 1  | -1 | 1  | -1 | -1 | -1 | 1  | -1 |
| -1 | 1  | -1 | 1  | -1 | -1 | -1 | 0  | -1 |













|    |    |    |   |   |   |    |    |    |
|----|----|----|---|---|---|----|----|----|
| 1  | 1  | 1  | 1 | 1 | 1 | 1  | 1  | 1  |
| 1  | 1  | 1  | 1 | 1 | 1 | 1  | 1  | 1  |
| 1  | 1  | 0  | 1 | 1 | 1 | 1  | 1  | 1  |
| 1  | 1  | 1  | 1 | 1 | 1 | 1  | 1  | 1  |
| 1  | 1  | 1  | 1 | 1 | 1 | 1  | 1  | 1  |
| -1 | 1  | 0  | 1 | 1 | 1 | -1 | -1 | 1  |
| 1  | 1  | 1  | 1 | 1 | 1 | 1  | 1  | 1  |
| 1  | 0  | -1 | 0 | 0 | 0 | 0  | 0  | 1  |
| 1  | 1  | 1  | 1 | 1 | 1 | 1  | 1  | 1  |
| 1  | 1  | 1  | 1 | 1 | 1 | 1  | 1  | 1  |
| 1  | 1  | 1  | 0 | 1 | 1 | 1  | 1  | 1  |
| 1  | 1  | 1  | 1 | 1 | 1 | 1  | 1  | 1  |
| 1  | 1  | 1  | 1 | 1 | 1 | 1  | 1  | 1  |
| 1  | 1  | 1  | 1 | 1 | 1 | 1  | 1  | 1  |
| 1  | 1  | 1  | 0 | 1 | 1 | 0  | 1  | 1  |
| 1  | 1  | 1  | 1 | 1 | 1 | 1  | 1  | 1  |
| 1  | 1  | 1  | 1 | 1 | 1 | 1  | 1  | 1  |
| 1  | 1  | 1  | 1 | 1 | 1 | 1  | 1  | 1  |
| 1  | 1  | 1  | 1 | 1 | 1 | 1  | 1  | 1  |
| 1  | 1  | 1  | 1 | 1 | 1 | 1  | 1  | 1  |
| 1  | 1  | 0  | 1 | 1 | 1 | 0  | 1  | -1 |
| 1  | 1  | 1  | 1 | 1 | 1 | 1  | 1  | -1 |
| 1  | 1  | -1 | 1 | 1 | 1 | -1 | -1 | 1  |
| 0  | 1  | 1  | 0 | 1 | 1 | 0  | 1  | 1  |
| 1  | 1  | 1  | 1 | 1 | 1 | 1  | 1  | 1  |
| 1  | 1  | 1  | 1 | 1 | 1 | 1  | 1  | 1  |
| 1  | 1  | 1  | 1 | 1 | 1 | 1  | 1  | 1  |
| 1  | 1  | 1  | 1 | 1 | 1 | 1  | 1  | 1  |
| 1  | 1  | 1  | 1 | 1 | 1 | 1  | 1  | 1  |
| 1  | 1  | 1  | 1 | 1 | 1 | 1  | 1  | 1  |
| 1  | 1  | 1  | 1 | 1 | 1 | 1  | 1  | 1  |
| 0  | 1  | 0  | 1 | 1 | 1 | 1  | 1  | 1  |
| 1  | 1  | 0  | 0 | 1 | 1 | 1  | 1  | 1  |
| 1  | 1  | 1  | 1 | 1 | 1 | 1  | 1  | 1  |
| 1  | 1  | 1  | 1 | 1 | 1 | 1  | 1  | 1  |
| 1  | 1  | 1  | 1 | 1 | 1 | 1  | 1  | 1  |
| 1  | 1  | 1  | 1 | 1 | 1 | 1  | 1  | 1  |
| 1  | 1  | 1  | 1 | 1 | 1 | 1  | 1  | 1  |
| 1  | 1  | 1  | 0 | 1 | 1 | 1  | 1  | 1  |
| 1  | 1  | 1  | 1 | 1 | 1 | 1  | 1  | 1  |
| 1  | 1  | 1  | 1 | 1 | 1 | 1  | 1  | 0  |
| 1  | 1  | 1  | 1 | 1 | 1 | 1  | 1  | 1  |
| 1  | 1  | 1  | 1 | 1 | 1 | 1  | 1  | 1  |
| 1  | 1  | 1  | 1 | 1 | 1 | 1  | 1  | 1  |
| 1  | 1  | 1  | 1 | 1 | 1 | 1  | 1  | 1  |
| 1  | 1  | 1  | 1 | 1 | 1 | 1  | 1  | 1  |
| 1  | 1  | 1  | 1 | 1 | 1 | 1  | 1  | 1  |
| 1  | 1  | 1  | 1 | 1 | 1 | 1  | 1  | 1  |
| 1  | 1  | 0  | 1 | 1 | 1 | 1  | 1  | 0  |
| 1  | 1  | 1  | 1 | 1 | 1 | 1  | 1  | 1  |
| 0  | -1 | 1  | 0 | 1 | 0 | 0  | 0  | 0  |



|    |    |    |    |    |    |    |    |    |
|----|----|----|----|----|----|----|----|----|
| 1  | -1 | 0  | 0  | 1  | 0  | 0  | 1  | 0  |
| 0  | 1  | 0  | -1 | 1  | 0  | 0  | 0  | 1  |
| 1  | 1  | 1  | 0  | 1  | 1  | 1  | 1  | 1  |
| 1  | 1  | 1  | 1  | 1  | 1  | 1  | 1  | 1  |
| 1  | 1  | 1  | 1  | 1  | 1  | 1  | 1  | 1  |
| 1  | 1  | 1  | 1  | 1  | 1  | 1  | 1  | 1  |
| 1  | 1  | -1 | -1 | -1 | -1 | -1 | 0  | 1  |
| 1  | 1  | 1  | -1 | 0  | -1 | -1 | 1  | 1  |
| -1 | 1  | -1 | -1 | -1 | -1 | -1 | -1 | 1  |
| 1  | -1 | 0  | 0  | 0  | 0  | 0  | 0  | -1 |
| 1  | 1  | 1  | 1  | 1  | 1  | 1  | 1  | 1  |
| 1  | 1  | 1  | 1  | 1  | 1  | 1  | 1  | 1  |
| 1  | 1  | 1  | 1  | 1  | 1  | 1  | 1  | 1  |
| 1  | 1  | 1  | 1  | 1  | 1  | 1  | 1  | 1  |
| 1  | 1  | 1  | 1  | 1  | 1  | 1  | 1  | 1  |
| 1  | 1  | 1  | 1  | 1  | 1  | 1  | 1  | 1  |
| 1  | 1  | 1  | 1  | 1  | 1  | 1  | 1  | 1  |
| 0  | 1  | 0  | 0  | 1  | 0  | -1 | -1 | 0  |
| 1  | 1  | 0  | 1  | 0  | 1  | 0  | 0  | 1  |
| 1  | 0  | 1  | 0  | 1  | 1  | 1  | 1  | 1  |
| -1 | -1 | -1 | -1 | -1 | -1 | -1 | 0  | -1 |
| 1  | 1  | 1  | 1  | 1  | 1  | 1  | 1  | 1  |
| 1  | 1  | 1  | 1  | 1  | 1  | 1  | 1  | 1  |
| 1  | 1  | -1 | 1  | 1  | 1  | 1  | 1  | 1  |
| 1  | 1  | -1 | 0  | 1  | 1  | 0  | 1  | 1  |
| 1  | 1  | -1 | 1  | 1  | 1  | 0  | 1  | 1  |
| -1 | -1 | -1 | -1 | -1 | -1 | -1 | -1 | 0  |
| -1 | 1  | 0  | -1 | 0  | 0  | 1  | -1 | 1  |
| -1 | 0  | -1 |    | 0  | -1 | -1 | 0  | -1 |
| 1  | 1  | 1  | 1  | 1  | 1  | 1  | 1  | 1  |
| 1  | 1  | 1  | 1  | 1  | 1  | 1  | 1  | 1  |
| -1 | 1  | 0  | -1 | 0  | -1 | 0  | -1 | 0  |
| 0  | 1  | 0  | 0  | 1  | 1  | 0  | 0  | 1  |
| 0  | 1  | 0  | 1  | 1  | 1  | 0  | 1  | 1  |
| 1  | 1  | 1  | 1  | 1  | 1  | 0  | -1 | 0  |
| 0  | -1 | -1 | -1 | 0  | 0  | -1 | -1 | 0  |
| -1 | 1  | -1 | -1 | 0  | -1 | -1 | -1 | 0  |
| 1  | 0  | 0  | 1  | 1  | 1  | 1  | 0  | 1  |
| 1  | 1  | 1  | 1  | 1  | 1  | 1  | 1  | 1  |
| 0  | 1  | 0  | 1  | 1  | 1  | 1  | 1  | 1  |
| 1  | 1  | 1  | 1  | 1  | 1  | 1  | 1  | 1  |
| 1  | 1  | 1  | 1  | 1  | 1  | 1  | 1  | 1  |
| -1 | 1  | -1 | 1  | 1  | 1  | 0  | 1  | 1  |
| -1 | 0  | 0  | 0  | 1  | 1  | 0  | 1  | 1  |
| 1  | 0  | 1  | 1  | 1  | 1  | 1  | 1  | 1  |
| 1  | 1  | 1  | 1  | 1  | 1  | 1  | 1  | 1  |
| 1  | 1  | 1  | 1  | 1  | 1  | 1  | 1  | 1  |
| 1  | 1  | 0  | 1  | 1  | 1  | 0  | 1  | 1  |
| 1  | 1  | 0  | 1  | 1  | 1  | 0  | 1  | 1  |
| 1  | 1  | -1 | -1 | 0  | -1 | -1 | -1 | -1 |
| 1  | 1  | -1 | -1 | -1 | -1 | -1 | -1 | -1 |
| 1  | 0  | 1  | 1  | 1  | 1  | 1  | 1  | 1  |
| 1  | 1  | 1  | 1  | 1  | 1  | 1  | 1  | 1  |
| 1  | 1  | 1  | 1  | 1  | 1  | 1  | 1  | 1  |
| 1  | 1  | 1  | 1  | 1  | 1  | 1  | 1  | 1  |
| 1  | 1  | 1  | 1  | 1  | 1  | 1  | 1  | 1  |
| 1  | 1  | 1  | 1  | 1  | 1  | 0  | 1  | 1  |
| 1  | 1  | 1  | 1  | 1  | 1  | 0  | 1  | 1  |
| 0  | 1  | -1 | 1  | 0  | 1  | -1 | -1 | 0  |
